# Supplementary material for: Postnatal Conditional Deletion of Bcl11b in Striatal Projection Neurons Mimics the Transcriptional Signature of Huntington’s Disease
Source: Biomedicines. 2022 Sep 23;10(10):2377. doi: 10.3390/biomedicines10102377 (PMC9598565; doi:10.3390/biomedicines10102377)
Supplement: Supplementary file 1 [file biomedicines-10-02377-s001.zip › Table S2 HDSigDB_Mouse_2021_table copy.xls]

## Sheet: HDSigDB_Mouse_2021_table
Term	Overlap	P-value	Adjusted P-value	Old P-value	Old Adjusted P-value	Odds Ratio	Combined Score	Genes
CAG Length-Dependent Genes In dSPNs Of HD Mice Down PMID32681824	891/2690	5.78e-172	1.45e-168	0	0	4.06494	1602.77	POP5;HTR4;ZFYVE28;NDST1;SAMD15;AKT2;PPP4R4;AKT3;RAVER2;PWWP2A;PKNOX1;MEF2A;RBFOX2;FIBCD1;CACNA2D2;MRTFA;SCAMP1;RC3H2;BCR;EML4;EML5;RBP4;RFX4;ORAI2;ASPHD2;FAR1;ATF6;NGEF;ZBTB8A;MTMR3;MEAF6;TARSL2;AGAP3;IQGAP2;NYAP2;RHOT2;EPB41L1;D5ERTD579E;PIP5K1A;SFN;AMZ1;ZBTB7A;VTI1B;MYH7B;CREBBP;PRPF38B;JUP;GPR12;NEBL;TIPARP;LRBA;ERLIN1;PBX2;NETO2;GRIN2B;NR2F6;SFXN3;GSTM6;HRK;LIN54;SRPX;GPR26;LRRC10B;ARHGAP1;BH…
Genes Changed In The Striatum Of zQ175 KI Mice Vs WT GSE123657	1176/4355	6.47e-156	8.1e-153	0	0	3.25861	1164.42	UXS1;NEXMIF;SPINT2;HTR4;PTPDC1;ZFYVE28;NDST1;SAMD14;SAMD15;DPYSL4;AKT2;PPP4R4;RAVER2;DPYSL3;NDST3;PWWP2A;PKNOX1;SAMD10;HES6;STARD7;STARD8;PHKA1;UPB1;BCR;EML5;RBP4;FAR1;ASPHD2;RABL2;ATF6;NGEF;SKAP2;PIF1;ZBTB8A;ABCB4;LYPD1;TAPBPL;IQGAP2;RHOT2;EPB41L1;RDH11;D5ERTD579E;1110051M20RIK;SFN;CFAP65;AMZ1;EXPH5;VTI1B;ZBTB7C;GM10471;MYH7B;CREBBP;GPR12;NEBL;EDEM1;NR2F1;ERLIN1;EIF2AK4;NETO2;GRIN2B;FAT1;NAPEPLD…
Genes Down-Regulated In dSPNs Of 9 Wks R6/2 Vs WT PMID32681824	847/2636	2.51e-152	2.1e-149	0	0	3.7994	1326.27	POP5;HTR4;ZFYVE28;NDST1;AKT2;PPP4R4;AKT3;FIBCD1;CACNA2D2;SCAMP1;RC3H2;BCR;EML5;RBP4;RFX4;ORAI2;ASPHD2;FAR1;ATF6;NGEF;PIF1;MEAF6;LYPD1;PDGFB;IQGAP2;RHOT2;EPB41L1;PRKAR2B;EPB41L2;D5ERTD579E;SYNDIG1;SFN;AMZ1;VTI1B;JUP;GPR12;NEBL;ERLIN1;PBX2;NETO2;L1CAM;GRIN2B;NR2F6;DAZL;SFXN3;HRK;SRPX;GPR26;LRRC10B;BHLHE41;SHB;LRRC1;SMPD3;JPH4;TMEM47;NHSL2;HEY1;TMEM44;NEFM;SH3BGRL3;DLGAP2;STUM;PCMTD1;SLC18A3;OFD1;AR…
Genes Changed In Striatum Of R6/2 Vs WT Mice GSE109416	1164/4397	3.8e-146	2.38e-143	0	0	3.13571	1049.97	PID1;NEXMIF;HTR4;PTPDC1;ZFYVE28;NDST1;SAMD14;SAMD15;PSMD5;AKT2;PPP4R4;AKT3;DPYSL3;NDST3;PWWP2A;MEF2A;STARD4;STARD7;FIBCD1;CACNA2D2;UPB1;BCR;EML5;RBP4;RFX4;ORAI2;FAR1;ASPHD2;RABL2;ATF6;NGEF;ATF4;SLBP;GM10220;SAR1A;TARSL2;FLII;LYPD1;IQGAP2;SLC30A10;RHOT2;HSPH1;EPB41L1;PRKAR2B;D5ERTD579E;CFAP69;AMZ1;ZBTB7A;VTI1B;ABCA1;CREBBP;JUP;GPR12;TIPARP;NEBL;NCAPH2;LRBA;NR2F1;ERLIN1;NETO2;GRIN2B;DAZL;FAT1;NAPEP…
Expression In 22 Mon CHL2 HD Mice GSE10202	1112/4141	1.34e-142	6.69e-140	0	0	3.1423	1026.52	POP5;PID1;NEXMIF;SPINT2;HTR4;ALKBH6;PTPDC1;ZFYVE28;ZDBF2;COMTD1;SAMD14;AKT2;AKT3;DPYSL3;LIPG;ZFP286;HES6;FIBCD1;UPB1;BCR;EML5;RBP4;RFX4;FAR1;ASPHD2;ATF6;NGEF;SF1;ATF4;SLBP;ZBTB8A;CHIA1;FLII;PDGFB;LYPD1;AGAP3;IQGAP2;SLC30A10;HSPH1;EPB41L1;RDH11;PRKAR2B;D5ERTD579E;1110051M20RIK;CFAP69;VTI1B;ABCA1;MYH7B;GPR12;TIPARP;EDEM1;NR2F1;ERLIN1;PBX2;NETO2;NR2F6;DAZL;FXYD2;FAT1;SFXN4;PRRT4;HRK;ACHE;SHB;LRRC1;S…
Genes Down-Regulated In The Astrocytes Of zQ175 KI Mice Vs WT At 12 Month Old GSE124846	464/1062	3.06e-133	1.28e-130	0	0	5.59355	1706.73	CYFIP2;TLNRD1;WIPF3;ADARB1;HTR4;FNBP1L;ZFYVE28;CNST;AI593442;PPP4R4;AKT3;PWWP2A;IER5;ANKS1B;STARD4;WSB2;PRKCB;FIBCD1;MRTFA;SCAMP1;SYTL5;UPB1;BCR;EML5;RBP4;ADCY9;HECW2;ASPHD2;ANKK1;ATF6;NGEF;ZBTB8A;NEDD4L;AGAP3;IQGAP2;HSPH1;RIC8B;EPB41L1;PRKAR2B;FLRT3;ZFP180;D5ERTD579E;SYNDIG1;CHST15;GSG1L;SFN;AMZ1;ZBTB7A;VTI1B;CDK17;MYH7B;NDFIP2;PLK5;ARPP21;PLK2;ERLIN1;NETO2;NR1D1;GRIN2B;WDR54;CYLD;GIPC2;PLCH2;HR…
Genes Down-Regulated In Striatum Of R6/2 Vs WT Mice GSE109416	735/2259	3.03e-132	1.08e-129	0	0	3.72017	1126.59	CYFIP2;TLNRD1;SERPINE2;WIPF3;STMN4;ADARB1;HTR4;ADARB2;FNBP1L;ELK1;SLC4A4;ZFYVE28;NDST1;CNST;SAMD15;AI593442;AKT2;PPP4R4;AKT3;PWWP2A;IER5;ANKS1B;MEF2A;MED1;PRKCI;STARD4;MBNL2;UNC13A;WSB2;PRKCB;FIBCD1;CACNA2D2;SYTL5;UPB1;DKK2;BCR;EML5;GPR162;RBP4;DAAM2;HECW2;RFX4;MAP1A;ORAI2;ASPHD2;FAR1;ANKK1;ATF6;NGEF;GM10220;TARSL2;LYPD1;NEDD4L;IQGAP2;SLC30A10;XKRX;FAM171A1;RHOT2;HSPH1;RIC8B;EPB41L1;FLRT3;PRKAR2B…
Striatum RNA M2 Module (Blue) PMID26900923	648/1866	4.82e-130	1.51e-127	0	0	4.01233	1194.72	CYFIP2;POP5;TLNRD1;RPL31;UXS1;WIPF3;HTR4;FNBP1L;ELK1;SLC4A4;ZFYVE28;CNST;AI593442;MSANTD1;AKT2;PPP4R4;PWWP2A;PKNOX1;IER5;ANKS1B;PRKCI;MBNL2;UNC13A;WSB2;PRKCB;DDX11;STARD8;FIBCD1;MRTFA;SCAMP1;SYTL5;UPB1;DKK2;BCR;EML5;RBP4;HECW2;RFX4;ASPHD2;ANKK1;ATF6;NGEF;ZBTB8A;NEDD4L;IQGAP2;XKRX;FAM171A1;RHOT2;RIC8B;EPB41L1;FLRT3;ZFP180;D5ERTD579E;CHST15;PIP5K1A;GSG1L;SFN;AMZ1;ST3GAL2;VPS16;VTI1B;S100A10;CDK17;M…
Genes Down-Regulated In Expression In 22 Mon CHL2 HD Mice GSE10202	658/1927	3.87e-128	1.08e-125	0	0	3.9165	1149.01	CYFIP2;POP5;TLNRD1;WIPF3;HTR4;FNBP1L;SLC4A4;ZFYVE28;CNST;AI593442;AKT2;AKT3;LIPG;IER5;ANKS1B;PRKCI;MBNL2;IAH1;UNC13A;PRKCB;DDX11;FIBCD1;UPB1;BCR;EML5;RBP4;ADCY9;HECW2;RFX4;ASPHD2;FAR1;ATF6;NGEF;SF1;ZBTB8A;CHIA1;LYPD1;NEDD4L;AGAP3;IQGAP2;SLC30A10;XKRX;HSPH1;RIC8B;EPB41L1;FLRT3;PRKAR2B;ZFP180;D5ERTD579E;LDHD;CHST15;GSG1L;RREB1;ST3GAL2;VTI1B;S100A10;CDK17;MYH7B;NDFIP2;PLK5;ARPP21;GPR12;TIPARP;PLK2;E…
Genes Down-Regulated In The Striatum Of zQ175 KI Mice Vs WT GSE123657	715/2218	1.04e-125	2.59e-123	0	0	3.63867	1047.17	CYFIP2;TLNRD1;UXS1;WIPF3;HTR4;FNBP1L;ELK1;SLC4A4;GPATCH8;ZFYVE28;NDST1;CNST;SAMD15;AI593442;AKT2;PPP4R4;4921524J17RIK;RAVER2;PWWP2A;PKNOX1;IER5;ANKS1B;PRKCI;IAH1;UNC13A;WSB2;PRKCB;DDX11;STARD8;PHKA1;SYTL5;UPB1;DKK2;BCR;EML5;RBP4;ADCY9;DAAM2;HECW2;MAP1A;ASPHD2;FAR1;ANKK1;ATF6;NGEF;ZBTB8A;LYPD1;NEDD4L;IQGAP2;FAM149A;FAM171A1;RHOT2;RIC8B;EPB41L1;ZFP180;D5ERTD579E;CHST15;GSG1L;SFN;AMZ1;ST3GAL2;VTI1B;…
Genes Down-Regulated In The Astrocytes Of zQ175 KI Mice Vs WT At 6 Month Old GSE124846	369/749	5.99e-125	1.36e-122	0	0	6.81152	1948.32	CYFIP2;TLNRD1;LPGAT1;WIPF3;ICAM5;FNBP1L;HTR4;ZFYVE28;RPS6KA4;SYNPR;FRAT1;CNST;AI593442;PPP4R4;AKT3;IER5;AGFG2;ANKS1B;UNC13A;PRKCB;ACTN2;ACTN1;FIBCD1;SCAMP1;UPB1;KRT9;BCR;TIAM2;RBP4;ADCY9;CRISPLD1;HECW2;GM9925;AKAP9;RRAGD;SPATA13;KCNQ3;ASPHD2;RIN1;ATF6;NGEF;CCNO;KCTD16;NECAB2;NEDD4L;TGFA;IQGAP2;ACTR3B;SEC14L3;RIC8B;SEC14L1;EPB41L1;PRKAR2B;ZFP180;PENK;CHST15;INPP5J;GSG1L;OTOF;N4BP3;AMZ1;ZBTB7A;SCN3…
Down-regulated Genes In Striatum Of 6 Mon HD Q175 Mice Vs Q20 PMID26900923	891/3173	3.84e-120	8.01e-118	0	0	3.10426	853.562	POP5;UXS1;HTR4;ZFYVE28;NDST1;AKT2;PPP4R4;RAVER2;AKT3;PWWP2A;PKNOX1;STARD8;FIBCD1;SCAMP1;UPB1;BCR;EML4;EML5;RBP4;RFX4;ASPHD2;ATF6;NGEF;ZBTB8A;TARSL2;CHIA1;AGAP3;IQGAP2;RHOT2;EPB41L1;D5ERTD579E;PIP5K1A;SFN;AMZ1;ZBTB7A;VTI1B;B3GALNT2;MYH7B;GPR12;TIPARP;NEBL;ERLIN1;PBX2;NETO2;DAZL;SFXN3;SFXN4;SFXN2;PRRT4;GSTM6;HRK;SRPX;GPR26;LRRC10B;BHLHE41;SHB;LRRC1;MMP23;SMPD3;JPH4;TMEM47;NHSL2;HEY1;TMEM44;SH3BGRL3…
Differentially Expressed Genes In Striatum Of 10 Mon HD Q175 Mice Vs Q20 PMID26900923	1071/4185	2.28e-119	4.39e-117	0	0	2.85564	780.114	PID1;UXS1;A430005L14RIK;SPINT2;HTR4;PTPDC1;ZFYVE28;SAMD14;AKT2;PPP4R4;RAVER2;NDST3;LIPG;PKNOX1;HES6;STARD7;STARD8;FIBCD1;PHKA1;UPB1;RC3H2;BCR;EML5;RBP4;RFX4;RBP1;ASPHD2;ATF6;ATF3;NGEF;SKAP2;ZBTB8A;SAR1A;ABCB4;AGAP3;TAPBPL;IQGAP2;DEDD2;RHOT2;EPB41L1;D5ERTD579E;SFN;AMZ1;EXPH5;VTI1B;B3GALNT2;MYH7B;GPR12;NEBL;EDEM1;PBX2;NETO2;SFXN3;FAT1;SFXN4;PRRT4;GSTM6;EZH2;HRK;SRPX;LAD1;GPR26;LRRC10B;BHLHE41;SHB;L…
Differentially Expressed Genes In Striatum Of 10 Mon HD Q140 Mice Vs Q20 GSE78274	1019/3899	1.87e-118	3.35e-116	0	0	2.89781	785.53	POP5;NEXMIF;SPINT2;HTR4;PTPDC1;ZFYVE28;SAMD14;SAMD15;LSM11;DPYSL4;AKT2;PPP4R4;RAVER2;AKT3;NDST3;LIPG;HES6;STARD7;PHKA1;UPB1;BCR;RBP4;RFX4;ORAI2;ATF6;ATF3;SKAP2;ATF4;SAR1A;ABCB4;AGAP3;IQGAP2;SLC30A10;DEDD2;RHOT2;HLCS;RDH11;D5ERTD579E;1110051M20RIK;SFN;CFAP65;ZBTB7A;EXPH5;VTI1B;JAG2;ABCA1;GM10471;MYH7B;GPR12;TIPARP;NEBL;EIF2AK4;NETO2;L1CAM;GRIN2B;NR2F6;FAT1;NAPEPLD;SFXN4;GSTM6;DMRTC1A;HRK;SRPX;GPR2…
Genes Down-Regulated In iSPNs Of 9 Wks R6/2 Vs WT PMID32681824	744/2451	6.7e-116	1.1e-113	0	0	3.33759	885.122	CYFIP2;POP5;TLNRD1;RPL31;UXS1;WIPF3;EMC10;STMN4;FNBP1L;SLC4A4;ZFYVE28;CNST;AI593442;SCN11A;AKT2;PPP4R4;4921524J17RIK;AKT3;IER5;ANKS1B;ZP3R;MBNL2;WSB2;PRKCB;COL23A1;CACNA2D2;SCAMP1;UPB1;RC3H2;DKK2;BCR;ADCY9;ASPHD2;FAR1;FAR2;ASTN2;ANKK1;ATF6;NGEF;NAA60;PIF1;ANAPC16;NEDD4L;IQGAP2;XKRX;FAM171A1;HSPH1;RIC8B;C7;FLRT3;PRKAR2B;D5ERTD579E;LDHD;SYNDIG1;CHST15;GSG1L;ZBTB7A;ST3GAL2;LHPP;VTI1B;S100A10;CDK17;N…
Down-regulated Genes In Striatum Of 6 Mon HD Q140 Mice Vs Q20 GSE78274	534/1457	7e-116	1.1e-113	0	0	4.21717	1118.2	CYFIP2;TLNRD1;RPL31;UXS1;WIPF3;FNBP1L;SLC4A4;ZFYVE28;PCMT1;SAMD15;CNST;AI593442;AKT2;PPP4R4;AKT3;PWWP2A;IER5;ANKS1B;PRKCI;MBNL2;WSB2;PRKCB;DDX11;SCAMP1;SYTL5;UPB1;DKK2;BCR;RBP4;ADCY9;HECW2;ASPHD2;ATF6;NGEF;ZBTB8A;MEAF6;TARSL2;NEDD4L;AGAP3;IQGAP2;FAM171A1;RHOT2;RIC8B;FLRT3;ZFP180;D5ERTD579E;SYNDIG1;PIP5K1A;GSG1L;SFN;ST3GAL2;VTI1B;S100A10;CDK17;MYH7B;NDFIP2;PLK5;ARPP21;NEBL;TIPARP;PLK2;NETO2;NR1D1;…
Genes Down-Regulated In CAG Length-Dependent Genes In 10 Mon Mouse Striatum PMID26900923	808/2795	2.25e-114	3.31e-112	0	0	3.15744	826.255	POP5;UXS1;HTR4;ZFYVE28;AKT2;PPP4R4;RAVER2;AKT3;PKNOX1;STARD8;FIBCD1;MRTFA;PHKA1;SCAMP1;UPB1;BCR;EML5;RBP4;RFX4;RBP1;ASPHD2;ATF6;NGEF;ZBTB8A;AGAP3;IQGAP2;RHOT2;EPB41L1;PRKAR2B;D5ERTD579E;SFN;AMZ1;ZBTB7A;VTI1B;B3GALNT2;MYH7B;GPR12;NEBL;ERLIN1;PBX2;NETO2;SFXN3;SFXN4;PRRT4;GSTM6;EZH2;HRK;SRPX;GPR26;LRRC10B;BHLHE41;SHB;LRRC1;MMP23;SMPD3;JPH4;TMEM47;NHSL2;HEY1;TMEM44;SH3BGRL3;JAK2;DLGAP2;PCMTD1;SLC18A3…
Genes Down-Regulated In R6/1 Poor Vs WT GSE135057	793/2720	4.5e-114	6.25e-112	0	0	3.18356	830.881	POP5;HTR4;ZFYVE28;NDST1;AKT2;PPP4R4;AKT3;RAVER2;PKNOX1;MEF2A;STARD8;FIBCD1;UPB1;BCR;EML5;RBP4;RFX4;ORAI3;RBP1;ORAI2;ASPHD2;ATF6;NGEF;ZBTB8A;TARSL2;PDGFB;IQGAP2;RHOT2;HSPH1;EPB41L1;PRKAR2B;EPB41L2;D5ERTD579E;SYNDIG1;PIP5K1A;SFN;AMZ1;ZBTB7A;VTI1B;MYH7B;JUP;GPR12;NEBL;ERLIN1;PBX2;NETO2;GRIN2B;NR2F6;SFXN3;GSTM6;HRK;GPR26;LRRC10B;KCNC3;BHLHE41;SHB;LRRC1;SMPD3;JPH4;NHSL2;HEY1;TMEM44;NEFM;SH3BGRL3;JAK2;…
Genes Changed In Foxp2/Olfm3-expressing Neurons Of HD Patients Vs Control PMID32681824	977/3726	3.21e-113	4.23e-111	0	0	2.86857	743.036	PID1;NEXMIF;HTR4;PTPDC1;ZFYVE28;ZDBF2;LSM11;PSMD5;PPP4R4;AKT3;DPYSL3;NDST3;PKNOX1;MEF2A;RBFOX2;HPCAL1;CACNA2D2;EML5;FAR1;ASPHD2;FAR2;PLBD2;NGEF;SKAP2;MTMR3;AGAP3;IQGAP2;SLC30A10;ADAMTS10;HSPH1;HLCS;ADAMTS19;PRKAR2B;EPB41L2;1110051M20RIK;SYNDIG1;CFAP69;PIP5K1A;PIP5K1B;ZBTB7C;ABCA1;GPR12;CADM1;NEBL;LRBA;NR2F1;EIF2AK4;NETO2;UCK2;FAT1;SFXN2;ARHGAP1;LRRC1;SMPD3;JPH4;MED13;HEY1;TMEM44;JAK2;DLGAP2;STUM;…
Genes Down-Regulated In R6/1 Good Vs WT GSE135057	740/2463	1.39e-112	1.73e-110	0	0	3.27896	844.541	CYFIP2;POP5;TLNRD1;WIPF3;STMN4;HTR4;FNBP1L;SLC4A4;ZFYVE28;NDST1;AI593442;AKT2;PPP4R4;AKT3;RAVER2;IER5;ANKS1B;MBNL2;UNC13A;WSB2;PRKCB;DDX11;STARD8;FIBCD1;PHKA1;SYTL5;UPB1;DKK2;BCR;EML5;GPR162;RBP4;DAAM2;HECW2;RFX4;ORAI3;MAP1A;RBP1;ASPHD2;ANKK1;ATF6;UBA52;NGEF;ZBTB8A;TARSL2;PNP2;PDGFB;NEDD4L;AGAP3;IQGAP2;XKRX;FAM171A1;RHOT2;HSPH1;RIC8B;EPB41L1;FLRT3;ZFP180;D5ERTD579E;LDHD;CHST15;GSG1L;SFN;AMZ1;ZBTB…
Expression In 12 Wk R6/2 HD Mice (Set2) GSE9804	1179/4919	3.16e-112	3.76e-110	0	0	2.67103	685.761	PID1;UXS1;NEXMIF;A430005L14RIK;HTR4;PTPDC1;ZFYVE28;SAMD14;ZFYVE27;DPYSL4;AKT2;PPP4R4;AKT3;DPYSL3;HES6;STARD7;FIBCD1;UPB1;RC3H2;BCR;RBP4;RFX4;ASPHD2;RABL2;ATF6;NGEF;SLBP;ZBTB8A;MTMR3;SAR1A;CHIA1;FLII;LYPD1;IQGAP2;SLC30A10;DEDD2;EPB41L1;RDH11;PRKAR2B;D5ERTD579E;1110051M20RIK;SYNDIG1;CFAP69;AMZ1;VTI1B;ABCA1;MYH7B;CREBBP;GPR12;TIPARP;NEBL;LRBA;EDEM1;NR2F1;ERLIN1;PBX2;EIF2AK4;NETO2;NR2F6;DAZL;FXYD2;FA…
Genes Changed In R6/1 Good Vs WT GSE135057	1139/4679	3.34e-112	3.8e-110	0	0	2.69881	692.74	POP5;NEXMIF;SPINT2;HTR4;ALKBH6;PTPDC1;ZFYVE28;NDST1;SAMD14;ZFYVE27;DPYSL4;PSMD5;AKT2;PPP4R4;RAVER2;AKT3;DPYSL3;SAMD10;HES6;STARD7;STARD8;FIBCD1;PHKA1;UPB1;BCR;EML5;RBP4;RFX4;ORAI3;RBP1;ASPHD2;ATF6;NGEF;SLBP;ZBTB8A;MTMR3;SAR1A;TARSL2;ABCB4;FLII;PDGFB;AGAP3;IQGAP2;DEDD2;RHOT2;HSPH1;EPB41L1;RDH11;D5ERTD579E;1110051M20RIK;SFN;CFAP65;AMZ1;ZBTB7A;VTI1B;MYH7B;CREBBP;GPR12;TIPARP;NEBL;ERLIN1;PBX2;EIF2AK4…
Down-regulated Genes In Striatum Of 10 Mon HD Q175 Mice Vs Q20 PMID26900923	687/2221	4.11e-110	4.47e-108	0	0	3.37283	849.521	CYFIP2;TLNRD1;UXS1;WIPF3;HTR4;FNBP1L;ELK1;SLC4A4;ZFYVE28;CNST;AI593442;MSANTD1;AKT2;PPP4R4;RAVER2;PKNOX1;IER5;ANKS1B;PRKCI;MBNL2;UNC13A;PRKCB;DDX11;STARD8;FIBCD1;PHKA1;SYTL5;UPB1;BCR;EML5;RBP4;ADCY9;HECW2;RFX4;RBP1;ASPHD2;ANKK1;ATF6;NGEF;ZBTB8A;PNP2;NEDD4L;AGAP3;IQGAP2;FAM171A1;RHOT2;RIC8B;EPB41L1;FLRT3;ZFP180;D5ERTD579E;CHST15;GSG1L;SFN;AMZ1;RREB1;ST3GAL2;VTI1B;S100A10;B3GALNT2;CDK17;MYH7B;NDFIP…
Genes Changed In The Astrocytes Of zQ175 KI Mice Vs WT At 6 Month Old GSE124846	404/964	8.94e-108	9.32e-106	0	0	5.08048	1252.28	CYFIP2;TLNRD1;WIPF3;HTR4;FNBP1L;ZFYVE28;CNST;AI593442;PPP4R4;AKT3;IER5;ANKS1B;UNC13A;PRKCB;FIBCD1;SOX11;SCAMP1;UPB1;BCR;RBP4;ADCY9;HECW2;RBP1;ASPHD2;ATF6;NGEF;NEDD4L;IQGAP2;RIC8B;EPB41L1;PRKAR2B;ZFP180;CHST15;GSG1L;AMZ1;ZBTB7A;VTI1B;CDK17;MYH7B;NDFIP2;PLK5;GPR12;ARPP21;PLK2;NETO2;GRIN2B;GPR137C;CYLD;SLC6A6;CDK13;HRK;SRPX;GPR26;LRRC10B;SHB;LYST;ABCC12;SMG5;JPH4;SMPD3;C1QTNF4;NHSL2;NEFL;PHF24;DLGAP…
Genes Down-Regulated In CAG Length-Dependent Genes In 6 Mon Mouse Striatum PMID26900923	935/3572	1.34e-106	1.34e-104	0	0	2.81802	686.979	POP5;UXS1;HTR4;ZFYVE28;NDST1;AKT2;PPP4R4;RAVER2;AKT3;PWWP2A;PKNOX1;STARD8;FIBCD1;PHKA1;SCAMP1;UPB1;BCR;EML4;EML5;RBP4;RFX4;ASPHD2;ATF6;NGEF;ZBTB8A;TARSL2;CHIA1;AGAP3;IQGAP2;RHOT2;EPB41L1;D5ERTD579E;PIP5K1A;SFN;AMZ1;ZBTB7A;VTI1B;JAG2;B3GALNT2;MYH7B;GPR12;TIPARP;NEBL;LRBA;ERLIN1;PBX2;NETO2;DAZL;SFXN3;SFXN4;SFXN2;PRRT4;GSTM6;HRK;LIN54;SRPX;GPR26;LRRC10B;BHLHE41;SHB;LRRC1;MMP23;SMPD3;JPH4;TMEM47;NHSL…
Differentially Expressed Genes In Striatum Of 6 Mon HD Q140 Mice Vs Q20 GSE78274	732/2512	1.06e-103	1.01e-101	0	0	3.11583	738.779	CYFIP2;TLNRD1;RPL31;UXS1;WIPF3;ACCS;DCAF5;FNBP1L;SLC4A4;PTPDC1;ZFYVE28;PCMT1;SAMD14;CNST;SAMD15;DPYSL4;AI593442;AKT2;PPP4R4;AKT3;WDR91;PWWP2A;IER5;ANKS1B;UNC13B;HES6;PRKCI;MBNL2;WSB2;PRKCB;DDX11;SCAMP1;SYTL5;UPB1;DKK2;BCR;RBP4;ADCY9;HECW2;SPIN2C;ASPHD2;ATF6;NGEF;SKAP2;ZBTB8A;MEAF6;TARSL2;ABCB4;NEDD4L;AGAP3;IQGAP2;FAM171A1;RHOT2;RIC8B;HLCS;FLRT3;ZFP180;D5ERTD579E;SYNDIG1;PIP5K1A;GSG1L;SFN;ST3GAL2;…
Genes Changed In The Striatum Of zQ175 Neo- Mice Vs WT GSE123657	996/3956	1.09e-103	1.01e-101	0	0	2.70497	641.297	PID1;NEXMIF;SPINT2;HTR4;PTPDC1;ZFYVE28;ZDBF2;NDST1;SAMD14;SAMD15;DPYSL4;AKT2;PPP4R4;DPYSL3;NDST3;PWWP2A;PKNOX1;HES6;RBFOX2;STARD7;CACNA2D2;UPB1;BCR;EML5;RBP4;RFX4;ORAI3;ASPHD2;ATF6;NGEF;SKAP2;ZBTB8A;ABCB4;FLII;TAPBPL;IQGAP2;NYAP2;DEDD2;RHOT2;RDH11;D5ERTD579E;SFN;AMZ1;EXPH5;VTI1B;ZBTB7C;ABCA1;MYH7B;CREBBP;GPR12;TIPARP;EDEM1;EIF2AK4;NETO2;NR2F6;SFXN3;FAT1;SFXN2;GSTM6;HRK;SRPX;LAD1;GPR26;LRRC10B;SHB…
Down-regulated Genes In Striatum Of HD Q175 Mice PMID26900923	768/2701	1.54e-103	1.38e-101	0	0	3.03407	718.273	CYFIP2;POP5;RPL31;UXS1;WIPF3;STMN4;HTR4;FNBP1L;ELK1;SLC4A4;ZFYVE28;NDST1;CNST;AI593442;AKT2;PPP4R4;4921524J17RIK;PWWP2A;PKNOX1;IER5;ANKS1B;PRKCI;STARD4;MBNL2;UNC13A;WSB2;PRKCB;DDX11;STARD8;FIBCD1;PHKA1;SCAMP1;SYTL5;UPB1;DKK2;GTPBP3;BCR;EML5;RBP4;HECW2;RFX4;ASPHD2;ANKK1;ATF6;NGEF;ZBTB8A;NEDD4L;AGAP3;IQGAP2;FAM171A1;RHOT2;RIC8B;EPB41L1;FLRT3;ZFP180;D5ERTD579E;LDHD;CHST15;PIP5K1A;GSG1L;SFN;AMZ1;ZBTB…
Genes Down-Regulated In dSPNs Of zQ175DN Vs HdhQ20 PMID32681824	343/754	4.31e-103	3.72e-101	0	0	5.78067	1362.53	CYFIP2;CPNE9;CCNK;TLNRD1;WIPF2;WIPF3;HDAC11;PPP2R2A;SLC4A4;ZFYVE28;RPS6KA4;CNST;AI593442;RASSF3;AKT2;PPP4R4;RPS6KA2;AKT3;CPNE2;IER5;AGFG2;ANKS1B;PRKCI;MBNL2;PRKCB;ARL15;LIMCH1;SYTL5;KRT9;BCR;TIAM2;GAREM1;HECW2;MAP1A;AKAP9;RRAGD;SPATA13;SIK3;RIN1;ATF6;NGEF;TRIM11;MEAF6;NEDD4L;STC1;AGAP3;RHOT2;RIC8B;CHTF8;SEC14L1;EPB41L1;ZFP180;D5ERTD579E;PENK;INPP5J;GSG1L;DYM;ZBTB7A;S100A10;VTI1B;CDK17;EGR1;NDFIP2…
Genes Down-Regulated In The Astrocytes Of R6/2 Mice Vs WT At 2 Month Old GSE124846	502/1414	3.07e-102	2.56e-100	0	0	3.95835	925.24	CYFIP2;TLNRD1;WIPF3;HTR4;ADARB2;ZFYVE28;CNST;AI593442;AKT2;PPP4R4;AKT3;ANKS1B;MEF2A;STARD4;MBNL2;UNC13A;PRKCB;DDX11;FIBCD1;HPCAL1;CACNA2D2;MRTFA;PHKA1;SYTL5;UPB1;DKK2;BCR;RBP4;ADCY9;HECW2;MAP1A;ATF6;ATF3;NGEF;ZBTB8A;TARSL2;LYPD1;NEDD4L;AGAP3;IQGAP2;HSPH1;RIC8B;EPB41L1;FLRT3;CHST15;GSG1L;ZBTB7A;S100A10;CDK17;MYH7B;PLK5;GPR12;ARPP21;TIPARP;PLK2;ERLIN1;NETO2;NR1D1;GRIN2B;CYLD;SLC6A6;SQLE;GALNTL6;PLC…
Differentially Expressed Genes In R6/1 HD Mice PMID30811995	592/1832	5.06e-102	4.09e-100	0	0	3.50319	817.091	TLNRD1;NEXMIF;WIPF3;STMN4;HTR4;SLC4A4;GLDN;ZDBF2;ZFYVE28;SAMD14;AI593442;AKT2;PPP4R4;AKT3;LIPG;IER5;ANKS1B;PRKCB;DDX11;FIBCD1;B630019K06RIK;UPB1;BCR;RBP4;GPR165;ADCY9;RBP1;ACOT1;ASPHD2;ATF6;NGEF;ZBTB8A;CHIA1;NEDD4L;IQGAP2;XKRX;ADAMTS19;FLRT3;ZFP180;LDHD;CHST15;GSG1L;AMZ1;VTI1B;S100A10;ABCA1;CDK17;MYH7B;NDFIP2;PLK5;ARPP21;GPR12;PLK2;NR1D1;NETO2;WDR54;DAZL;CYLD;MEX3A;ADI1;GIPC2;FAT1;PCDHB5;DCHS1;PL…
Genes Changed In dSPNs Of zQ175DN Vs HdhQ20 PMID32681824	434/1127	4.32e-101	3.38e-99	0	0	4.43127	1024.06	CYFIP2;TLNRD1;WIPF2;WIPF3;SLC4A4;ZFYVE28;GCSH;SAMD14;CNST;AI593442;AKT2;PPP4R4;AKT3;DPYSL3;NDST3;IER5;ANKS1B;HES6;PRKCI;MBNL2;PRKCB;B630019K06RIK;SOX11;SYTL5;BCR;HECW2;MAP1A;ATF6;NGEF;SKAP2;MEAF6;ENDOD1;NEDD4L;AGAP3;RHOT2;RIC8B;EPB41L1;ZFP180;D5ERTD579E;GSG1L;ZBTB7A;VTI1B;S100A10;ABCA1;CDK17;NDFIP2;PLK5;JUP;ARPP21;NEBL;PLK2;NETO2;NR1D1;TMEM196;CYLD;FAT1;SFXN3;CDK13;HRK;CDKN1A;SETD2;GPR26;LRRC10B;…
Genes Down-Regulated In Expression In 12 Wk R6/2 HD Mice (Set1) GSE9803	610/1945	4.07e-99	3.09e-97	0	0	3.36068	761.366	CYFIP2;TLNRD1;WIPF3;STMN4;HTR4;FNBP1L;SLC4A4;ZFYVE28;NDST1;LSM11;AI593442;AKT2;AKT3;LIPG;IER5;ANKS1B;STARD4;MBNL2;IAH1;UNC13A;WSB2;PRKCB;DDX11;FIBCD1;HPCAL1;BCR;RBP4;ADCY9;DAAM1;DAAM2;HECW2;RFX4;MAP1A;ASPHD2;ATF6;NGEF;ZBTB8A;TARSL2;CHIA1;PNP2;NEDD4L;AGAP3;IQGAP2;RIC8B;FLRT3;D5ERTD579E;LDHD;CHST15;GSG1L;AMZ1;ZBTB7A;RREB1;ST3GAL2;VTI1B;MYH7B;NDFIP2;PLK5;ARPP21;GPR12;PLK2;PBX2;NR1D1;NETO2;GRIN2B;WDR…
Genes Changed In iSPNs Of R6/2 Vs WT PMID32681824	378/910	4.43e-99	3.26e-97	0	0	4.95765	1122.75	CYFIP2;PID1;SERPINE2;WIPF3;PPP2R2A;ICAM5;HTR4;FNBP1L;SLC4A4;GPATCH8;HS6ST3;ZFYVE28;SYNPR;PPP4R4;NDST3;AGFG2;ANKS1B;ACVR1;EPHA6;MBNL2;UNC13A;ACTN2;ARL15;PRKCB;COG5;ACTN1;SCAMP1;FNDC9;BCR;TIAM2;EML5;GAREM1;ADCY9;ADGRB2;HECW2;ADGRB1;SPATA13;AKAP9;KCNQ3;SIK3;ATF6;NGEF;KCTD16;NECAB2;SPTBN4;EPB41;PCDH10;PCDH15;TGFA;NEDD4L;IQGAP2;NYAP2;NKAIN2;FAM171A1;STRIP2;DHX32;SEC14L1;RIC8B;EPB41L1;PRKAR2B;1110051M2…
Genes Down-Regulated In iSPNs Of R6/2 Vs WT PMID32681824	306/641	2.28e-98	1.63e-96	0	0	6.26026	1407.5	CYFIP2;SERPINE2;WIPF3;PPP2R2A;ICAM5;FNBP1L;HTR4;SLC4A4;HS6ST3;ZFYVE28;SYNPR;PPP4R4;AGFG2;ANKS1B;ACVR1;MBNL2;UNC13A;PRKCB;ACTN2;ARL15;ACTN1;SCAMP1;FNDC9;BCR;TIAM2;EML5;ADCY9;GAREM1;ADGRB2;HECW2;ADGRB1;AKAP9;SPATA13;KCNQ3;SIK3;ATF6;NGEF;KCTD16;NECAB2;SPTBN4;EPB41;NEDD4L;TGFA;IQGAP2;NKAIN2;FAM171A1;STRIP2;RIC8B;DHX32;SEC14L1;EPB41L1;PRKAR2B;D5ERTD579E;PENK;GSG1L;AMZ1;SCN3A;VTI1B;CDK17;NDFIP2;RABGAP1…
Genes Down-Regulated In R6/1 HD Mice PMID30811995	438/1163	3.23e-98	2.24e-96	0	0	4.27376	959.381	TLNRD1;WIPF3;STMN4;HTR4;SLC4A4;ZFYVE28;AI593442;AKT2;PPP4R4;AKT3;LIPG;IER5;ANKS1B;PRKCB;DDX11;FIBCD1;UPB1;BCR;RBP4;ADCY9;RBP1;ASPHD2;ATF6;NGEF;ZBTB8A;CHIA1;NEDD4L;IQGAP2;XKRX;FLRT3;ZFP180;LDHD;CHST15;GSG1L;AMZ1;VTI1B;S100A10;CDK17;MYH7B;NDFIP2;PLK5;GPR12;ARPP21;PLK2;NETO2;NR1D1;WDR54;DAZL;CYLD;GIPC2;PLCH2;PRRT4;GSTM6;EZH2;HRK;BSPH1;SRPX;GPR26;LRRC10B;TCF20;SHB;ABCC12;SMG5;LRRC1;JPH4;SMPD3;ZCWPW1;…
Genes Down-Regulated In dSPNs Of R6/2 Vs WT PMID32681824	328/726	2.07e-97	1.4e-95	0	0	5.67776	1264	CYFIP2;SERPINE2;UXS1;WIPF3;PPP2R2A;ICAM5;FNBP1L;SLC4A4;HS6ST3;ZFYVE28;SYNPR;AI593442;AKT2;PPP4R4;AGFG2;ANKS1B;ACVR1;MBNL2;UNC13A;PRKCB;ACTN2;ARL15;LIMCH1;ACTN1;SCAMP1;FNDC9;BCR;TIAM2;ADCY9;GAREM1;ADGRB2;HECW2;ADGRB1;AKAP9;SPATA13;KCNQ3;ATF6;NGEF;KCTD16;NECAB2;SPTBN4;NEDD4L;TGFA;IQGAP2;NKAIN2;FAM171A1;STRIP2;RIC8B;DHX32;SEC14L1;EPB41L1;FLRT3;PRKAR2B;D5ERTD579E;PENK;SYNDIG1;MAP7;GSG1L;DYM;AMZ1;SCN3…
Genes Down-Regulated In dSPNs Of HdhQ170 Vs HdhQ20 PMID32681824	303/639	1.98e-96	1.31e-94	0	0	6.17256	1360.21	CYFIP2;CPNE9;CCNK;TLNRD1;WIPF2;WIPF3;HDAC11;PPP2R2A;SLC4A4;ZFYVE28;RPS6KA4;CNST;AI593442;RASSF3;AKT2;PPP4R4;IER5;AGFG2;ANKS1B;PRKCI;MBNL2;UNC13A;PRKCB;ARL15;LIMCH1;KRT9;BCR;TIAM2;GAREM1;HECW2;AKAP9;RRAGD;SPATA13;SIK3;ATF6;NGEF;TRIM11;MEAF6;NEDD4L;AGAP3;SEC14L3;RIC8B;SEC14L1;EPB41L1;ZFP180;D5ERTD579E;PENK;INPP5J;GSG1L;DYM;ZBTB7A;RAB11FIP3;S100A10;CDK17;EGR1;NDFIP2;PLK5;ARPP21;JUP;BCL11B;EGR4;NEBL;…
Genes Down-Regulated In Expression In 12 Wk R6/2 HD Mice (Set2) GSE9804	651/2187	3.94e-95	2.53e-93	0	0	3.13733	681.974	TLNRD1;SERPINE2;RPL31;UXS1;WIPF3;HTR4;FNBP1L;SLC4A4;ZFYVE28;CNST;AI593442;AKT2;PPP4R4;4921524J17RIK;ZXDB;AKT3;IER5;ANKS1B;PRKCI;MBNL2;IAH1;WSB2;PRKCB;FIBCD1;UPB1;BCR;RBP4;ADCY9;HECW2;RFX4;ASPHD2;ATF6;NGEF;RNF122;ZBTB8A;CHIA1;PNP2;LYPD1;NEDD4L;IQGAP2;SLC30A10;XKRX;RIC8B;EPB41L1;FLRT3;PRKAR2B;ZFP180;D5ERTD579E;LDHD;SYNDIG1;CHST15;GSG1L;AMZ1;ST3GAL2;LHPP;VTI1B;CDK17;MYH7B;NDFIP2;PLK5;ARPP21;GPR12;NE…
Genes Down-Regulated In Expression In Striatum Of 11 Mon BACHD-deltaN17 HD Mice GSE64386	460/1284	1.27e-94	7.98e-93	0	0	3.96284	856.768	TLNRD1;SERPINE2;FNBP1L;NDST1;CNST;AI593442;MSANTD1;PPP4R4;AKT3;IER5;STARD4;MBNL2;WSB2;PRKCB;STARD8;FIBCD1;UPB1;EML5;RFX4;HECW2;ASPHD2;NGEF;ZBTB8A;CHIA1;TARSL2;LYPD1;NEDD4L;IQGAP2;XKRX;RHOT2;RIC8B;FLRT3;D5ERTD579E;LDHD;CHST15;RREB1;ST3GAL2;VTI1B;JAG2;GPR12;ARPP21;PLK2;PBX2;NR1D1;WDR54;NR2F6;DAZL;SLC6A6;UCK2;RNF103;ARL2BP;GIPC2;SFXN3;GALNTL6;PLCH2;EZH2;GSDME;HRK;GPR26;ABCC12;LRRC1;JPH4;SMPD3;TRIM9;…
Genes Changed In The Astrocytes Of zQ175 KI Mice Vs WT At 12 Month Old GSE124846	574/1820	1.02e-93	6.23e-92	0	0	3.35137	717.597	CYFIP2;TLNRD1;WIPF3;ADARB1;ACCS;HTR4;FNBP1L;PTPDC1;ZFYVE28;COMTD1;CNST;AI593442;PPP4R4;AKT3;NDST3;STMN1;PWWP2A;IER5;ANKS1B;UNC13B;STARD4;WSB2;PRKCB;STARD8;FIBCD1;MRTFA;SOX11;SCAMP1;SYTL5;UPB1;BCR;EML5;RBP4;ADCY9;HECW2;ASPHD2;ANKK1;ATF6;NGEF;SKAP2;ZBTB8A;NEDD4L;AGAP3;IQGAP2;HSPH1;RIC8B;EPB41L1;FLRT3;PRKAR2B;EPB41L2;ZFP180;D5ERTD579E;SYNDIG1;CHST15;GSG1L;SFN;AMZ1;ZBTB7A;EXPH5;VTI1B;CDK17;GM10471;MY…
Genes Changed In dSPNs Of R6/2 Vs WT PMID32681824	402/1041	1.17e-93	6.95e-92	0	0	4.40561	942.745	CYFIP2;PID1;SERPINE2;NEXMIF;UXS1;WIPF3;ADARB2;FNBP1L;SLC4A4;GPATCH8;ZFYVE28;AI593442;AKT2;PPP4R4;ANKS1B;UNC13B;MBNL2;UNC13A;PRKCB;SCAMP1;BCR;ADCY9;HECW2;ATF6;NGEF;NEDD4L;IQGAP2;NYAP2;FAM171A1;RIC8B;EPB41L1;PRKAR2B;FLRT3;1110051M20RIK;D5ERTD579E;SYNDIG1;GSG1L;PIP5K1B;AMZ1;VTI1B;CDK17;CREBBP;NDFIP2;ARPP21;NEBL;LRBA;PLK2;POU6F2;NETO2;GRIN2B;CYLD;SLC6A6;RNF103;GIPC2;PAM;GSDME;LRRC10B;MEI4;SHB;LYST;SM…
Down-regulated Genes In Striatum Of 10 Mon HD Q140 Mice Vs Q20 GSE78274	627/2085	2.77e-93	1.61e-91	0	0	3.16333	674.172	CYFIP2;POP5;PATJ;TLNRD1;SERPINE2;WIPF2;WIPF3;ADARB1;HTR4;SLC4A4;ZFYVE28;PCMT1;LSM11;SAMD15;AI593442;AKT2;PPP4R4;4921524J17RIK;AKT3;RAVER2;ANKS1B;PRKCI;MBNL2;IAH1;UNC13A;PRKCB;DDX11;PHKA1;SYTL5;UPB1;BCR;RBP4;ADCY9;DAAM2;HECW2;RFX4;MAP1A;ANKK1;ATF6;ATF4;NEDD4L;AGAP3;IQGAP2;FAM149A;RHOT2;ZFP180;D5ERTD579E;LDHD;GSG1L;SFN;ZBTB7A;RREB1;ST3GAL2;VTI1B;S100A10;JAG2;MYH7B;NDFIP2;PLK5;ARPP21;GPR12;NEBL;TIPA…
Genes Changed In dSPNs Of HdhQ170 Vs HdhQ20 PMID32681824	381/957	3.38e-93	1.92e-91	0	0	4.6089	981.341	CPNE9;CYFIP2;CCNK;TLNRD1;WIPF2;WIPF3;HDAC11;TONSL;PPP2R2A;SLC4A4;ZFYVE28;GCSH;RPS6KA4;SAMD14;CNST;RASSF3;AI593442;AKT2;PPP4R4;DPYSL3;LGALS8;IER5;AGFG2;ANKS1B;HES6;PRKCI;MBNL2;UNC13A;ARL15;LIMCH1;PRKCB;ENTPD5;CIRBP;B630019K06RIK;SOX11;KRT9;BCR;TIAM2;GAREM1;HECW2;SPATA13;AKAP9;RRAGD;SIK3;ATF6;NGEF;TRIM11;SKAP2;BEX3;BEX2;MEAF6;MAGED1;NEDD4L;AGAP3;SEC14L3;SEC14L1;RIC8B;EPB41L1;ZFP180;D5ERTD579E;PENK;…
Genes Down-Regulated In The Striatum Of zQ175 Neo- Mice Vs WT GSE123657	623/2068	5.54e-93	3.08e-91	0	0	3.16813	673.002	CYFIP2;TLNRD1;WIPF3;STMN4;HTR4;FNBP1L;SLC4A4;ZFYVE28;NDST1;SAMD15;AI593442;AKT2;PPP4R4;4921524J17RIK;PWWP2A;PKNOX1;IER5;ANKS1B;IAH1;UNC13A;WSB2;PRKCB;DDX11;UPB1;DKK2;GTPBP3;BCR;EML5;RBP4;HECW2;RFX4;ORAI3;ASPHD2;ANKK1;ATF6;NGEF;ZBTB8A;ANAPC16;NEDD4L;IQGAP2;FAM149A;XKRX;RHOT2;FAM124A;RIC8B;ZFP180;D5ERTD579E;GSG1L;SFN;AMZ1;ST3GAL2;VTI1B;S100A10;MYH7B;NDFIP2;PLK5;ARPP21;GPR12;TIPARP;PLK2;NETO2;WDR54;…
Genes Down-Regulated In Expression In Hsp90 Inhibitor Treated R6/2 HD Mice Vs WT Mice GSE29681	960/3903	2.29e-92	1.24e-90	0	0	2.5732	542.972	POP5;UXS1;HTR4;ZFYVE28;NDST1;AKT2;PPP4R4;AKT3;PWWP2A;MEF2A;RBFOX2;FIBCD1;CACNA2D2;SCAMP1;UPB1;BCR;EML5;RBP4;RFX4;ORAI2;FAR1;ASPHD2;ATF6;NGEF;PIF1;SAR1A;TARSL2;PDGFB;LYPD1;AGAP3;IQGAP2;SLC30A10;RHOT2;HSPH1;EPB41L1;PRKAR2B;EPB41L2;D5ERTD579E;SYNDIG1;AMZ1;ZBTB7A;VTI1B;GM10471;MYH7B;PRPF38B;JUP;GPR12;CADM1;TIPARP;NEBL;ERLIN1;PBX2;NETO2;GRIN2B;NR2F6;DAZL;ZFAT;SFXN3;PRRT4;GSTM6;HRK;GPR26;BHLHE41;ARHGAP…
Genes Down-Regulated In dSPNs Of zQ175DN Vs WT PMID32681824	237/451	9.31e-87	4.96e-85	0	0	7.43635	1473.09	CYFIP2;SERPINE2;UXS1;WIPF3;PPP2R2A;ICAM5;FNBP1L;SLC4A4;HS6ST3;ZFYVE28;PPP4R4;ANKS1B;ACVR1;MBNL2;RBFOX2;UNC13A;PRKCB;ACTN2;ARL15;SCAMP1;BCR;EML5;ADCY9;GAREM1;HECW2;ADGRB1;AKAP9;SPATA13;SIK3;ATF6;NGEF;KCTD16;NEDD4L;TGFA;IQGAP2;MBTD1;RIC8B;SEC14L1;EPB41L1;D5ERTD579E;PENK;MAP7;GSG1L;SCN3A;VTI1B;CDK17;NDFIP2;ARPP21;BCL11B;NEBL;PLK2;NETO2;GRIN2B;DCLK1;GPR137C;SRPK1;CYLD;SLC6A6;STAG1;CCDC88C;PPP1R1B;PCS…
Genes Changed In dSPNs Of zQ175DN Vs WT PMID32681824	285/622	4.33e-86	2.26e-84	0	0	5.74639	1129.49	CYFIP2;PID1;SERPINE2;UXS1;WIPF3;PPP2R2A;ICAM5;ADARB2;FNBP1L;SLC4A4;HS6ST3;ZFYVE28;PPP4R4;ANKS1B;ACVR1;MBNL2;RBFOX2;UNC13A;EPHA6;PRKCB;ACTN2;ARL15;SCAMP1;BCR;EML5;ADCY9;GAREM1;HECW2;ADGRB1;AKAP9;SPATA13;SIK3;ASTN2;ATF6;NGEF;KCTD16;PCDH10;NEDD4L;TGFA;IQGAP2;MBTD1;STRIP2;RIC8B;SEC14L1;EPB41L1;1110051M20RIK;D5ERTD579E;PENK;SYNDIG1;MAP7;GSG1L;SCN3A;VTI1B;CDK17;NDFIP2;ARPP21;BCL11B;NEBL;PLK2;POU6F2;NET…
Genes Down-Regulated In Expression In R6/1 HD Mice GSE59571	327/788	4.58e-85	2.34e-83	0	0	4.86661	945.084	CPNE9;TLNRD1;WIPF3;PPP2R2A;ICAM5;HTR4;SLC4A4;ZFYVE28;RPS6KA4;SYNPR;AI593442;AKT2;PPP4R4;AKT3;IER5;AGFG2;ANKS1B;ACTN2;PRKCB;DDX11;FIBCD1;SYTL5;UPB1;KRT9;BCR;TIAM2;THEG;ADCY9;ADGRB2;CRISPLD1;AKAP9;RRAGD;KCNQ3;ASPHD2;RIN1;ATF6;NGEF;CCNO;KCTD16;NECAB2;ZBTB8A;NEDD4L;STC1;IQGAP2;SEC14L2;SEC14L3;SEC14L1;PENK;LDHD;CHST15;INPP5J;GSG1L;OTOF;N4BP3;AMZ1;VTI1B;CDK17;MYH7B;EGR1;GPR12;ARPP21;BCL11B;FAM78A;PLK2;…
Genes Down-Regulated In Expression In 13 Wk TIF-IA KO HD Mice GSE29647	642/2257	3.33e-84	1.67e-82	0	0	2.91542	560.386	CYFIP2;TLNRD1;RPL31;UXS1;EMC10;SPINT2;ADARB1;ELK1;SLC4A4;DCAF4;GPATCH8;GLE1;PCMT1;AKT3;PKNOX1;IER5;ZFP286;MEF2A;STARD4;RBFOX2;UNC13A;WSB2;PRKCB;CACNA2D2;MRTFA;SCAMP1;FRS3;UPB1;BCR;EML5;GPR162;ADCY9;ATF6;NGEF;LRPAP1;NAA60;ZBTB8A;CHIA1;ABCB4;LYPD1;NEDD4L;AGAP3;IQGAP2;ABR;RHOT2;PCDHA1;EPB41L1;HLCS;1110051M20RIK;CHST15;PIP5K1A;PIP5K1B;ZBTB7A;ST3GAL2;VTI1B;CREBBP;NDFIP2;ARPP21;CADM1;GPR12;MTERF2;NCAPH…
Genes Down-Regulated In iSPNs Of zQ175DN Vs WT PMID32681824	226/426	9.19e-84	4.51e-82	0	0	7.56101	1445.66	WIPF3;PPP2R2A;FNBP1L;HTR4;SLC4A4;HS6ST3;ZFYVE28;PPP4R4;ANKS1B;MBNL2;RBFOX2;PRKCB;ACTN2;ARL15;BCR;EML5;ADCY9;GAREM1;HECW2;ADGRB1;AKAP9;SIK3;ATF6;NGEF;KCTD16;NEDD4L;TGFA;IQGAP2;MBTD1;RIC8B;SEC14L1;EPB41L1;D5ERTD579E;PENK;GSG1L;SCN3A;VTI1B;CDK17;NDFIP2;RABGAP1L;ARPP21;BCL11B;NEBL;PLK2;NETO2;GRIN2B;DCLK1;GPR137C;SRPK1;CYLD;SLC6A6;CCDC88C;PPP1R1B;PCSK2;RYR1;C2CD5;RYR3;LRRC1;TRIM9;CAMKV;PHF24;JAK2;JARI…
Expression In Striatum Of 11 Mon BACHD-deltaN17 HD Mice GSE64386	698/2573	2.33e-82	1.12e-80	0	0	2.75725	518.266	TRIR;TLNRD1;SERPINE2;A430005L14RIK;FNBP1L;PTPDC1;NDST1;SAMD14;CNST;AI593442;MSANTD1;PPP4R4;AKT3;IER5;UNC13B;HES6;STARD4;MBNL2;WSB2;PRKCB;STARD7;STARD8;FIBCD1;UPB1;EML5;GPR162;HECW2;RFX4;ACOT1;ASPHD2;RABL2;VPS28;NGEF;SKAP2;ZBTB8A;TARSL2;CHIA1;FLII;LYPD1;ENDOD1;NEDD4L;IQGAP2;XKRX;RHOT2;RIC8B;FLRT3;D5ERTD579E;LDHD;CHST15;S100A13;RREB1;ST3GAL2;VTI1B;JAG2;ACD;ARPP21;GPR12;GTF2IRD2;PLK2;THAP12;PBX2;NR1…
Yellow Module Eigengene Expression Profile Across Striatal Astrocytes Of R6/2 And Q175 Mice PMID31619545	318/775	3.75e-81	1.77e-79	0	0	4.75771	881.07	CPNE9;LPGAT1;RPL31;ADARB1;HTR4;RPS6KA4;CNST;MCIDAS;AI593442;SCN11A;DPF1;AGFG2;ACVR1;WSB2;ACTN2;ACTN1;DDX11;FIBCD1;HPCAL1;YOD1;UPB1;DKK2;KRT9;BCR;TIAM2;RBP4;ADCY9;CRISPLD1;HECW2;SPATA13;RRAGD;KCNQ3;FAR1;TRIB3;ASTN2;NGEF;CCNO;NECAB2;ZBTB8A;EPHA10;TARSL2;LYPD1;TGFA;AGAP3;XKRX;SEC14L3;HSPH1;SEC14L1;XRRA1;PENK;CHST15;INPP5J;GSG1L;OTOF;SFN;RAB11FIP4;VTI1B;CDK17;MYH7B;EGR1;NDFIP2;PLK5;GPR12;ARPP21;FAM78…
Genes Changed In iSPNs Of zQ175DN Vs WT PMID32681824	262/563	7.7e-81	3.57e-79	0	0	5.87273	1083.33	WIPF3;PPP2R2A;FNBP1L;HTR4;SLC4A4;HS6ST3;ZFYVE28;PPP4R4;ANKS1B;MBNL2;RBFOX2;PRKCB;ACTN2;ARL15;BCR;EML5;ADCY9;GAREM1;HECW2;ADGRB1;AKAP9;SIK3;MAML3;ATF6;NGEF;KCTD16;PCDH10;NEDD4L;TGFA;IQGAP2;MBTD1;RIC8B;SEC14L1;EPB41L1;1110051M20RIK;D5ERTD579E;PENK;SYNDIG1;GSG1L;SCN3A;VTI1B;CDK17;NDFIP2;RABGAP1L;ARPP21;BCL11B;NEBL;PLK2;POU6F2;NETO2;GRIN2B;DCLK1;GPR137C;SRPK1;CYLD;SLC6A6;CCDC88C;PPP1R1B;PCSK2;RYR1;TE…
Genes Changed In The Astrocytes Of R6/2 Mice Vs WT At 2 Month Old GSE124846	641/2294	1.79e-80	8.13e-79	0	0	2.83571	520.713	CYFIP2;TLNRD1;WIPF3;1700001L19RIK;SPINT2;HTR4;ADARB2;ZFYVE28;GCSH;CNST;ZFYVE27;DPYSL4;AI593442;AKT2;PPP4R4;AKT3;ANKS1B;MEF2A;UNC13B;HES6;STARD4;MBNL2;UNC13A;9330159F19RIK;NHLRC3;PRKCB;DDX11;FIBCD1;HPCAL1;CACNA2D2;MRTFA;PHKA1;SOX11;SYTL5;UPB1;DKK2;BCR;RBP4;ADCY9;HECW2;MAP1A;ACOT2;ATF6;ATF3;NGEF;SKAP2;LRPAP1;ZBTB8A;TARSL2;ABCB4;LYPD1;NEDD4L;AGAP3;IQGAP2;HSPH1;RIC8B;TERT;ADAMTS19;EPB41L1;FLRT3;CHST1…
CAG Length-Dependent Genes In iSPNs Of HD Mice Down PMID32681824	296/699	2.75e-79	1.23e-77	0	0	4.99335	903.263	CYFIP2;POP5;WIPF2;WIPF3;HDAC11;STMN4;PPP2R2A;FNBP1L;SLC4A4;ZFYVE28;RPS6KA4;CNST;AI593442;AKT2;PPP4R4;BTRC;AGFG2;TBC1D10A;ANKS1B;MBNL2;PRKCB;ACTN2;ARL15;ACTN1;SYTL5;UPB1;KRT9;THAP1;BCR;TIAM2;GAREM1;AKAP9;RRAGD;ASPHD2;TLN2;ANKK1;RIN1;ATF6;UBA52;NGEF;NECAB2;ANAPC16;TGFA;AGAP3;IQGAP2;PGS1;DGUOK;RIC8B;SEC14L1;INPP5F;EPB41L1;PENK;SYNDIG1;INPP5J;GSG1L;DYM;S100A10;VTI1B;EGR1;NDFIP2;PLK5;ARPP21;BCL11B;PLK…
Differentially Expressed Genes In R6/2 LNA-SCB Vs WT LNA-SCB Mice GSE85126	238/487	1.01e-78	4.43e-77	0	0	6.40737	1150.72	CPNE9;ICAM5;HTR4;SLC4A4;ZFYVE28;RPS6KA4;SYNPR;AI593442;SCN11A;PPP4R4;AKT3;AGFG2;ANKS1B;MUSK;PRKCB;ACTN2;ISLR2;ZFP618;FNDC9;UPB1;KRT9;BCR;TIAM2;RBP4;ADCY9;RRAGD;SPIN2C;TRIB3;ZFP7;ANKK1;RIN1;ATF6;NGEF;KCTD16;NECAB2;EPHA10;PPL;SEC14L3;SEC14L1;FLRT3;ZFP180;PENK;INPP5J;GSG1L;MYH7B;PLK5;ARPP21;GPR12;LRRN3;FAM78A;PCDH20;GREB1;POU6F2;DDIT4L;NETO2;SMARCA1;DCLK1;CYLD;MYO5B;GIPC2;PPP1R1B;HRK;ACVRL1;PCSK2;RY…
Genes Changed In dSPNs Of HD Patients Vs Control PMID32681824	816/3292	3.27e-77	1.41e-75	0	0	2.48698	437.995	PID1;UXS1;NEXMIF;HTR4;PTPDC1;ZFYVE28;ZDBF2;PPP4R4;RAVER2;AKT3;NDST3;PWWP2A;MEF2A;STARD4;RBFOX2;SCAMP1;BCR;EML4;EML5;RFX4;FAR1;FAR2;RABL2;ATF6;NGEF;SKAP2;AGAP3;NYAP2;SLC30A10;RHOT2;HSPH1;HLCS;EPB41L1;ADAMTS19;EPB41L2;D5ERTD579E;SYNDIG1;CFAP69;AMZ1;EXPH5;B3GALNT2;ABCA1;PRPF38B;CADM1;MTERF2;LRBA;EIF2AK4;NETO2;GRIN2B;FAT1;NAPEPLD;PSMG4;SFXN2;LIN54;LRRC1;SMPD3;JPH4;TMEM47;NHSL2;TUBA1B;TMEM44;NEFM;JAK2…
Genes Down-Regulated In Expression In Striatum Of 7 Mon BACHD-deltaN17 HD Mice GSE64386	374/1046	1.04e-75	4.41e-74	0	0	3.84429	663.739	CPNE9;TLNRD1;SERPINE2;GBA2;CYB5D2;RPS6KA4;CNST;AI593442;MSANTD1;PPP4R4;AKT3;CPNE2;AGFG2;WSB2;ACTN2;PRKCB;FIBCD1;CSNK1D;SCAMP1;UPB1;GTPBP3;KRT9;TIAM2;EML5;TIAM1;ADGRB2;HECW2;AKAP9;ASPHD2;TRIB3;RIN1;NGEF;CCNO;ZBTB8A;TARSL2;FBF1;LYPD1;IQGAP2;SMIM7;XKRX;SEC14L3;FAM171A1;DGUOK;RHOT2;STRIP2;SEC14L1;FLRT3;PIP5K1A;DYM;OTOF;RREB1;VTI1B;GPR12;ARPP21;BCL11B;FAM78A;PLK2;PDE2A;ERLIN1;PBX2;DDIT4L;NR1D1;DCLK1;W…
Genes Changed In The Astrocytes Of R6/2 Mice Vs WT At 3 Month Old GSE124846	932/4011	2.7e-74	1.13e-72	0	0	2.32906	394.541	PID1;SPINT2;HTR4;ALKBH6;ZFYVE28;NDST1;DPYSL4;PSMD5;AKT2;PPP4R4;AKT3;HES6;STARD4;FIBCD1;HPCAL1;CACNA2D2;PHKA1;UPB1;BCR;EML5;RBP1;ATF6;ATF3;NGEF;SKAP2;SLBP;ZBTB8A;MTMR3;TARSL2;ABCB4;FLII;LYPD1;TAPBPL;IQGAP2;SLC30A10;DEDD2;EPB41L1;ADAMTS19;SFN;AMZ1;ZBTB7A;ABCA1;MYH7B;JUP;GPR12;NEBL;EDEM1;NR2F1;ERLIN1;PBX2;NETO2;GRIN2B;UCK2;NAPEPLD;DCHS1;HRK;ACHE;GPR26;LRRC10B;KCNC3;KDM8;BHLHE41;ARHGAP1;SHB;MED16;SMP…
Down-regulated Genes In R6/2 LNA-SCB Vs WT LNA-SCB Mice GSE85126	207/403	2.44e-73	1e-71	0	0	7.01596	1173.06	CPNE9;ICAM5;HTR4;SLC4A4;ZFYVE28;RPS6KA4;SYNPR;AI593442;SCN11A;PPP4R4;AKT3;AGFG2;ANKS1B;MUSK;PRKCB;ACTN2;FNDC9;UPB1;KRT9;BCR;TIAM2;RBP4;ADCY9;RRAGD;TRIB3;ANKK1;RIN1;ATF6;NGEF;KCTD16;NECAB2;EPHA10;SEC14L3;SEC14L1;FLRT3;ZFP180;PENK;INPP5J;GSG1L;MYH7B;PLK5;ARPP21;GPR12;FAM78A;DDIT4L;NETO2;SMARCA1;DCLK1;CYLD;MYO5B;GIPC2;PPP1R1B;HRK;ACVRL1;PCSK2;RYR1;GPR26;LRRC10B;PCSK9;ABCC12;RYR3;SMPD3;CAMKV;TMEM44;R…
Expression In R6/1 HD Mice GSE59571	390/1138	4.94e-73	1.99e-71	0	0	3.609	600.87	TLNRD1;WIPF3;HTR4;SLC4A4;GLDN;ZFYVE28;SAMD14;AI593442;AKT2;PPP4R4;AKT3;IER5;ANKS1B;PRKCB;DDX11;FIBCD1;SYTL5;UPB1;BCR;ADCY9;ASPHD2;ATF6;NGEF;ZBTB8A;NEDD4L;IQGAP2;LDHD;CHST15;GSG1L;AMZ1;VTI1B;CDK17;MYH7B;GPR12;ARPP21;PLK2;ERLIN1;NETO2;NR1D1;GRIN2B;WDR54;CYLD;GIPC2;FAT1;DCHS1;PRRT4;HRK;BSPH1;LAD1;SRPX;GPR26;ZFP367;LRRC10B;TCF20;SHB;ABCC12;LRRC1;JPH4;SMPD3;FAM102B;NELFB;RSPO1;GPRASP2;ZFP365;PCMTD1;AR…
Probable Neuron-Enriched Genes PMID18171944	570/2017	1.68e-72	6.69e-71	0	0	2.82454	466.8	PNMAL1;TMEM200A;NEXMIF;WIPF3;RAPH1;1700001L19RIK;SPINT2;ADARB1;ADARB2;DCAF5;FNBP1L;ZDBF2;GLE1;PCMT1;LSM11;AI593442;4921524J17RIK;AKT3;DPYSL3;STMN1;RBFOX2;UNC13A;9330159F19RIK;WSB2;PRKCB;FIBCD1;HPCAL1;EML5;RBP4;DAAM1;ARMC6;ORAI2;SPIN2C;FAR2;MEAF6;LYPD1;PDGFB;NEDD4L;AGAP3;FAM124A;HSPH1;RIC8B;FLRT2;PCDHA1;EPB41L1;FLRT3;PRKAR2B;ZFP180;SYNDIG1;CHST15;S100A10;NDFIP2;NDFIP1;ARPP21;GPR12;PLK2;PBX2;NETO2;…
Genes Down-Regulated In The Astrocytes Of R6/2 Mice Vs WT At 3 Month Old GSE124846	622/2296	6.59e-72	2.58e-70	0	0	2.68948	440.809	CYFIP2;WIPF3;STMN4;ADARB1;HTR4;ZFYVE28;NDST1;AI593442;AKT2;PPP4R4;AKT3;ANKS1B;STARD4;MBNL2;UNC13A;WSB2;PRKCB;DDX11;FIBCD1;HPCAL1;CACNA2D2;PHKA1;SYTL5;UPB1;DKK2;BCR;EML5;ADCY9;DAAM2;HECW2;MAP1A;RBP1;ATF6;ATF3;NGEF;RNF122;ZBTB8A;TARSL2;LYPD1;ENDOD1;NEDD4L;TAPBPL;IQGAP2;FAM171A1;EPB41L1;LDHD;CHST15;GSG1L;SFN;AMZ1;ZBTB7A;CDK17;MYH7B;PLK5;JUP;ARPP21;GPR12;NEBL;PLK2;EDEM1;ERLIN1;PBX2;NR1D1;NETO2;ELL2;G…
Genes Changed In iSPNs Of HD Patients Vs Control PMID32681824	902/3886	5e-71	1.93e-69	0	0	2.30389	372.937	PID1;UXS1;NEXMIF;HTR4;PTPDC1;ZFYVE28;ZDBF2;ZFYVE27;AKT2;PPP4R4;RAVER2;AKT3;NDST3;PWWP2A;MEF2A;STARD4;RBFOX2;STARD7;CACNA2D2;SCAMP1;BCR;EML4;EML5;RFX4;FAR1;ASPHD2;FAR2;RABL2;ATF6;NGEF;SF1;MTMR3;NYAP2;SLC30A10;HSPH1;HLCS;EPB41L1;ADAMTS19;EPB41L2;D5ERTD579E;1110051M20RIK;SYNDIG1;CFAP69;AMZ1;EXPH5;B3GALNT2;CREBBP;PRPF38B;CADM1;MTERF2;LRBA;EIF2AK4;NETO2;L1CAM;GRIN2B;UCK2;NAPEPLD;PSMG4;SFXN2;ACHE;LRRC1…
HD Disease-Related Genes In HdhQ111 6 Mon Vs 2 Mon Mice PMID29020921	991/4428	1.32e-70	4.99e-69	0	0	2.23409	359.478	PID1;NEXMIF;SPINT2;ACCS;HTR4;ZFYVE28;COMTD1;LSM11;DPYSL4;AKT2;RAVER2;DPYSL3;NDST3;LIPG;PKNOX1;HES6;FIBCD1;HPCAL1;MRTFA;PHKA1;BCR;ORAI3;FAR1;ASPHD2;FAR2;ATF6;NGEF;SF1;ABCB4;FLII;AGAP3;SLC30A10;C7;ADAMTS19;D5ERTD579E;1110051M20RIK;CFAP69;PIP5K1A;SFN;PIP5K1B;AMZ1;EXPH5;B3GALNT2;CADM1;NR2F1;ERLIN1;GRIN2B;NR2F6;DAZL;NAPEPLD;SFXN4;DCHS1;ACHE;SRPX;LAD1;KCNC3;BHLHE41;MED16;SHD;LETM2;SMPD3;JPH4;HEY1;TMEM4…
Genes Down-Regulated In Corticostriatal Projection Neurons Of R6/2 Vs WT PMID32681824	349/991	1.79e-68	6.7e-67	0	0	3.72292	580.743	CPNE9;CYFIP2;CPNE8;LPGAT1;WIPF3;HDAC11;STMN4;ADARB1;ADARB2;SLC4A4;HS6ST3;ZFYVE28;RPS6KA3;LSM11;RASSF3;AI593442;AKT2;NDST3;STMN1;IER5;SCN1B;ANKS1B;EPHA4;MED1;STARD4;UNC13A;PRKCB;STARD8;RSAD1;HPCAL1;ZFP619;TMEM170B;HECW2;MAP1A;KCNQ3;MXRA7;RIN1;ATF6;1700016K19RIK;NGEF;BEX2;NECAB3;EPHA10;LYPD1;NYAP2;SMIM7;ABR;STRIP2;SEC14L1;FLRT2;PRKAR2B;PENK;LDHD;TSPAN5;GSG1L;ZBTB7A;RAB11FIP4;EXPH5;ZBTB7C;CDK17;EGR1…
Expression In 12 Wk R6/2 HD Mice (Set1) GSE9803	1038/4765	6.41e-68	2.36e-66	0	0	2.16989	335.72	PID1;NEXMIF;SPINT2;HTR4;PTPDC1;ZFYVE28;ZDBF2;NDST1;SAMD14;LSM11;AKT2;AKT3;DPYSL3;LIPG;HES6;STARD4;FIBCD1;HPCAL1;BCR;RBP4;RFX4;ASPHD2;ATF6;NGEF;SKAP2;SLBP;ZBTB8A;SAR1A;TARSL2;CHIA1;FLII;AGAP3;IQGAP2;DEDD2;RDH11;D5ERTD579E;1110051M20RIK;AMZ1;ZBTB7A;VTI1B;ABCA1;MYH7B;CREBBP;PRPF38B;GPR12;PBX2;NETO2;GRIN2B;NR2F6;ZFAT;SFXN3;FAT1;EZH2;HRK;LAD1;GPR26;SHB;LETM2;SMPD3;JPH4;NHSL2;HEY1;TMEM44;NEFM;SH3BGRL3;…
Genes Down-Regulated In Foxp2/Olfm3-expressing Neurons Of HD Patients Vs Control PMID32681824	553/1986	1.36e-67	4.93e-66	0	0	2.7483	423.145	PATJ;RPL31;WIPF3;ADARB1;HTR4;FNBP1L;SLC4A4;PTPDC1;GPATCH8;ZDBF2;ZFYVE28;LSM11;AI593442;PPP4R4;4921524J17RIK;NDST3;ANKS1B;MEF2A;MBNL2;CACNA2D2;EML5;ADCY9;ASPHD2;FAR1;FAR2;MAML3;NGEF;LRPAP1;NEDD4L;WDR61;AGAP3;FAM149A;FAM171A1;HSPH1;RIC8B;HLCS;PRKAR2B;EPB41L2;1110051M20RIK;SYNDIG1;CFAP69;CHST15;GSG1L;ST3GAL2;LHPP;CDK17;NDFIP2;ARPP21;CADM1;PLK2;LRBA;EIF2AK4;ELL2;PHC3;GLUD1;UCK2;SFXN2;GALNTL6;FANK1;RS…
Differentially Expressed Genes In Hippocampus Of 6 Mon HD Q175 Mice Vs Q20 GSE73503	1040/4824	2.03e-65	7.25e-64	0	0	2.13474	317.995	POP5;NEXMIF;SCX;ALKBH6;PTPDC1;ZFYVE28;ZDBF2;SAMD14;ZFYVE27;LSM11;DPYSL3;MEF2A;STARD7;STARD8;FIBCD1;HPCAL1;SCAMP1;RC3H2;EML5;RBP4;ORAI3;ORAI2;FAR1;ASPHD2;ATF6;PLBD2;ATF3;NGEF;SKAP2;ATF4;PDGFB;LYPD1;AGAP3;IQGAP2;NYAP2;MRPL12;RHOT2;EPB41L1;PRKAR2B;EPB41L2;1110051M20RIK;SYNDIG1;PIP5K1A;ZBTB7A;EXPH5;VTI1B;JAG2;ABCA1;GM10471;CREBBP;PRPF38B;GPR12;CADM1;NEBL;NR2F1;DAZL;PKIB;FAT1;ACHE;LRRC10B;KCNC3;SMPD3;…
Genes Down-Regulated In iSPNs Of 6 Mon HdhQ170 Vs HdhQ20 PMID32681824	427/1384	7.9e-65	2.78e-63	0	0	3.09741	457.183	CYFIP2;POP5;PID1;WIPF2;WIPF3;DCAF8;STMN4;FNBP1L;ZFYVE28;CNST;AI593442;PPP4R4;ANKS1B;PRKCI;IAH1;MBNL2;UNC13A;PRKCB;SYTL5;BCR;RFX4;ASPHD2;ANKK1;ATF6;UBA52;NGEF;ZBTB8A;NEDD4L;AGAP3;IQGAP2;FAM149A;RIC8B;EPB41L1;D5ERTD579E;SYNDIG1;GSG1L;ZBTB7A;VTI1B;S100A10;ACD;NDFIP2;PLK5;ARPP21;NEBL;PLK2;NETO2;GRIN2B;CYLD;HNRNPM;HRK;GPR26;ARHGAP1;LPCAT1;SHB;ABCC12;SMG5;JPH4;TRIM9;ZCWPW1;FAM102B;UBL3;HEY1;ADAMTSL5;PH…
Genes Down-Regulated In dSPNs Of HD Patients Vs Control PMID32681824	715/2916	7.87e-64	2.74e-62	0	0	2.37446	345.013	CYFIP2;PATJ;PID1;RPL31;UXS1;NEXMIF;WIPF3;RAPH1;ADARB1;HTR4;FNBP1L;SLC4A4;PTPDC1;GPATCH8;ZFYVE28;ZDBF2;CNST;PPP4R4;RAVER2;NDST3;PWWP2A;MPV17;ANKS1B;MEF2A;UNC13B;STARD4;MBNL2;RBFOX2;UNC13A;PRKCB;WDR73;SCAMP1;BCR;EML4;EML5;ADCY9;HECW2;RFX4;MAP1A;FAR1;FAR2;RABL2;MAML3;ASTN2;ATF6;NGEF;LRPAP1;ANAPC16;NEDD4L;WDR61;C9ORF72;HIF1A;FAM149A;RHOT2;HSPH1;RIC8B;HLCS;EPB41L1;ADAMTS19;EPB41L2;D5ERTD579E;SYNDIG1;C…
Genes Down-Regulated In HD Grade 3 Markers In Human Caudate Nucleus (HG-U133A) GSE3790	315/897	3e-61	1.03e-59	0	0	3.66856	511.243	CYFIP2;PNMAL1;GDE1;ICAM5;ADARB1;HTR4;FNBP1L;ELK1;SLC4A4;PCMT1;DPYSL4;NDST3;DPF1;RBFOX2;ATP6V1G2;WSB2;ACTN2;PRKCB;ACTN1;CACNA2D2;SOX11;SCAMP1;BCR;TIAM1;RBP4;ADCY9;ADGRB2;SUB1;MAP1A;RRAGD;SIK3;FAR2;MXRA7;NECAB2;LRPAP1;BEX2;CTBP1;NEDD4L;6430548M08RIK;ACTR3B;FAM149A;ABR;FAM171A1;HSPH1;RIC8B;5730409E04RIK;PCDHA1;INPP5F;EPB41L1;PRKAR2B;PENK;CHST15;SCN3B;ZBTB7A;SCN3A;CDK17;RABGAP1L;EGR4;LRRN3;ARPP21;BCL…
Genes Changed In Corticostriatal Projection Neurons Of R6/2 Vs WT PMID32681824	442/1494	3.05e-61	1.03e-59	0	0	2.91833	406.643	CYFIP2;WIPF3;EMC10;STMN4;ADARB1;ADARB2;SLC4A4;ZFYVE28;GCSH;SAMD14;LSM11;AI593442;AKT2;NDST3;STMN1;IER5;ANKS1B;MED1;STARD4;UNC13A;PRKCB;STARD8;COL23A1;HPCAL1;MRTFA;SOX11;HECW2;MAP1A;ACOT2;ATF6;NGEF;ATF4;LRPAP1;LYPD1;ENDOD1;NYAP2;ABR;FLRT2;PRKAR2B;LDHD;GSG1L;ZBTB7A;EXPH5;ZBTB7C;CDK17;PLK3;PRPF38B;ARPP21;TIPARP;PLK2;POU6F2;NR1D1;L1CAM;GRIN2B;SQLE;UNC119;GALNTL6;HRK;PHF2;CDKN1A;GPR26;LRRC10B;KCNC3;PH…
Expression In Striatum Of 7 Mon BACHD-deltaN17 HD Mice GSE64386	518/1886	9.24e-61	3.08e-59	0	0	2.66571	368.492	PID1;TLNRD1;SERPINE2;PTPDC1;SAMD14;CNST;AI593442;MSANTD1;PPP4R4;AKT3;MED1;WSB2;PRKCB;FIBCD1;SCAMP1;UPB1;GTPBP3;EML5;HECW2;ACOT1;ASPHD2;NGEF;SKAP2;ZBTB8A;TARSL2;LYPD1;IQGAP2;XKRX;FAM171A1;RHOT2;FLRT3;S100A13;PIP5K1A;RREB1;VTI1B;ACD;ARPP21;GPR12;H3F3B;PLK2;SETD1B;NR2F1;ERLIN1;PBX2;NR1D1;WDR54;NR2F6;SLC6A6;RNF103;ARL2BP;ADI1;GIPC2;PLCH2;EZH2;HRK;BSPH1;LIN54;ZFP367;TGFB1I1;ABCC12;SMG5;LRRC1;SMPD3;JPH…
Genes Down-Regulated In iSPNs Of HD Patients Vs Control PMID32681824	801/3490	5.07e-59	1.67e-57	0	0	2.19857	295.113	PID1;UXS1;NEXMIF;HTR4;PTPDC1;ZFYVE28;ZDBF2;ZFYVE27;AKT2;PPP4R4;RAVER2;AKT3;NDST3;PWWP2A;MEF2A;STARD4;RBFOX2;CACNA2D2;SCAMP1;BCR;EML4;EML5;RFX4;FAR1;ASPHD2;FAR2;RABL2;ATF6;NGEF;SF1;MTMR3;NYAP2;HSPH1;HLCS;EPB41L1;ADAMTS19;EPB41L2;D5ERTD579E;1110051M20RIK;SYNDIG1;CFAP69;AMZ1;EXPH5;B3GALNT2;CREBBP;PRPF38B;MTERF2;LRBA;EIF2AK4;NETO2;L1CAM;GRIN2B;UCK2;NAPEPLD;PSMG4;SFXN2;LRRC1;SMPD3;JPH4;NHSL2;TUBA1B;TM…
Genes Up-Regulated In Expression In Normal Human Brain Vs Other Fetal Tissues GSE65399	682/2806	8.5e-59	2.76e-57	0	0	2.32173	310.443	CYFIP2;TRIR;PID1;PNMAL1;TMEM200A;NEXMIF;WDR83;STMN4;ADARB1;FNBP1L;DCAF5;PCMT1;COMTD1;SAMD14;LSM11;DPYSL4;MSANTD1;AI593442;4921524J17RIK;ZXDB;AKT3;DPYSL3;NDST3;LIPG;STMN1;PKNOX1;IER5;ZFP286;ANKS1B;HES6;RBFOX2;UNC13A;WSB2;PRKCB;SOX11;SCAMP1;FRS3;GTPBP3;GPR162;DAAM1;MAP1A;FAR1;ASPHD2;RABL2;ASTN2;UBA52;NGEF;ZBTB8A;MEAF6;LYPD1;NEDD4L;AGAP3;PRDM10;C9ORF72;FAM149A;FAM171A1;ABR;HSPH1;PCDHA1;FLRT2;EPB41L1…
Genes Changed In Foxp2/Olfm3-expressing Neurons Of R6/2 Vs WT PMID32681824	297/840	2.15e-58	6.89e-57	0	0	3.689	489.846	SPON1;PID1;SERPINE2;WIPF3;PPP2R2A;ICAM5;HTR4;DCAF5;FNBP1L;SLC4A4;GPATCH8;HS6ST2;ZFYVE28;RPS6KA3;PPP4R4;RPS6KA2;AGFG2;ANKS1B;EPHA4;EPHA6;UNC13A;ACTN2;PRKCB;COG5;SCAMP1;BCR;TIAM1;ADCY9;ADGRB2;HECW2;ADGRB1;KCNQ3;TLN2;NGEF;KCTD16;SPTBN4;PCDH15;TGFA;NEDD4L;ACTR3B;NKAIN2;STRIP2;NKAIN3;SEC14L1;RIC8B;PRKAR2B;1110051M20RIK;D5ERTD579E;PENK;SYNDIG1;GSG1L;OTOF;KCNN2;CDK17;CREBBP;RABGAP1L;CADM1;ARPP21;BCL11B;…
Genes Changed In Foxp2/Olfm3-expressing Neurons Of zQ175DN Vs WT PMID32681824	248/633	2.68e-58	8.51e-57	0	0	4.3005	570.085	SPON1;PID1;SERPINE2;WIPF3;PPP2R2A;ADARB2;HTR4;SLC4A4;GPATCH8;HS6ST2;ZFYVE28;RPS6KA3;PPP4R4;EPHA4;MBNL2;RBFOX2;UNC13A;EPHA6;PRKCB;ACTN2;SYTL5;BCR;GAREM1;ADGRB2;HECW2;ADGRB1;AKAP9;SIK3;TLN2;ATF6;NGEF;KCTD16;LRPAP1;EPB41;PCDH15;NEDD4L;TGFA;TMTC1;NYAP2;NKAIN2;ABR;STRIP2;RIC8B;SEC14L1;1110051M20RIK;D5ERTD579E;PENK;GSG1L;OTOF;CDK17;RABGAP1L;BCL11B;NEBL;LRBA;RANBP17;NETO2;TMEM196;DCLK1;GPR137C;SLC6A6;ST…
Genes Down-Regulated In CAG Length-Dependent Proteins In 6 Mon Mouse Striatum PMID26900923	232/570	4.62e-58	1.45e-56	0	0	4.56629	602.838	CYFIP2;SPON1;TLNRD1;WIPF3;PPP2R2A;ICAM5;GLE1;ZFYVE28;RPS6KA4;CNST;AKT2;PPP4R4;CCDC97;AGFG2;ANKS1B;EPHA4;PRKCB;ACTN2;ACTN1;BOLA1;YOD1;SYTL5;BCR;TIAM2;GAREM1;ADGRB2;HECW2;ADGRB1;AKAP9;SIK3;RIN1;NGEF;KCTD16;NECAB2;PNP2;AGAP3;IQGAP2;ACTR3B;SEC14L2;DGUOK;SEC14L3;STRIP2;SEC14L1;FLRT3;PENK;INPP5J;GSG1L;ZBTB7A;CDK17;BBS2;ARPP21;BCL11B;PDE2A;ERLIN1;NETO2;DCLK1;CYLD;CYP2S1;PPP1R1B;SFXN3;KYAT3;PTPRS;ACY1;TE…
Genes Down-Regulated In iSPNs Of zQ175DN Vs HdhQ20 PMID32681824	478/1720	2.38e-57	7.37e-56	0	0	2.6833	349.845	CYFIP2;POP5;TLNRD1;WIPF2;WIPF3;DCAF8;STMN4;FNBP1L;ELK1;SLC4A4;ZFYVE28;CNST;AI593442;MSANTD1;AKT2;PPP4R4;IER5;ANKS1B;MBNL2;IAH1;WSB2;PRKCB;DDX11;MRTFA;SYTL5;UPB1;BCR;EML4;ASPHD2;ANKK1;ATF6;UBA52;NGEF;SAR1A;ANAPC16;CTBP1;NEDD4L;AGAP3;RHOT2;RIC8B;EPB41L1;D5ERTD579E;LDHD;SYNDIG1;GSG1L;ZBTB7A;VTI1B;S100A10;NDFIP2;ACD;PLK5;ARPP21;NCAPH2;PLK2;PBX2;NETO2;GRIN2B;NR2F6;HNRNPM;CYLD;HRK;CLTA;SHB;SMG5;JPH4;TR…
Genes Changed In Cerebellum Of 12 Week Old Atxn1[154Q/2Q] Vs WT GSE122099	571/2213	2.79e-57	8.51e-56	0	0	2.46379	320.841	PATJ;TLNRD1;SERPINE2;PNMAL1;TMEM200A;1700001L19RIK;STMN4;HTR4;ADARB2;RXFP3;ZDBF2;ZFYVE28;SAMD14;DPYSL4;AI593442;PPP4R4;STMN1;HOMER3;ANKS1B;PRKCI;STARD4;WSB2;FIBCD1;HPCAL1;CACNA2D2;SOX11;GPR165;DAAM2;HECW2;FAR2;MAML3;PLBD2;NGEF;RNF122;LRPAP1;CTBP2;LYPD1;IQGAP2;NYAP2;ABR;EPB41L1;FLRT3;PRKAR2B;1110051M20RIK;LDHD;SYNDIG1;GSG1L;AMZ1;LHPP;ZBTB7C;CREBBP;PLK5;CADM1;H3F3B;GTF2IRD2;NR2F1;POU6F2;PBX2;GRIN2B…
Genes Changed In WT Vs R6/1 Both Treated With AAV2/1-control GSE139847	227/560	2.01e-56	6.07e-55	0	0	4.5274	580.62	CPNE9;PATJ;SPARC;PPP2R2A;SPINT2;PTPDC1;ZDBF2;ZFYVE28;SYNPR;SAMD14;AI593442;RASSF3;PPP4R4;DPF1;IER5;ANKS1B;PRKCB;ACTN2;STARD8;KRT1;SLC6A11;TIAM2;HECW2;RRAGD;KCNQ3;ASPHD2;RIN1;ATF6;NGEF;NECAB3;ACTR3B;SEC14L1;PENK;GSG1L;CDK17;VAT1;EGR1;PLK5;ARPP21;PLK2;PCDH20;DDIT4L;NETO2;NR1D1;DCLK1;NET1;GALNTL6;CALM1;HRK;ACVRL1;PCSK2;RYR1;GASK1B;ZCCHC12;GPR26;LRRC10B;PTPRO;CAMKV;ENC1;TIMP2;PHF24;GPRASP2;ZFP365;CAP…
CAG Length-Dependent Genes In iSPNs Of HD Mice PMID32681824	544/2080	2.35e-56	6.99e-55	0	0	2.49571	319.679	CYFIP2;POP5;WIPF2;NEXMIF;WIPF3;RAPH1;STMN4;DCAF5;FNBP1L;SLC4A4;ZDBF2;ZFYVE28;GCSH;CNST;DPYSL4;AI593442;AKT2;PPP4R4;DPYSL3;NDST3;ANKS1B;HES6;MBNL2;PRKCB;PHKA1;SOX11;SYTL5;UPB1;BCR;DAAM1;DAAM2;ASPHD2;ANKK1;ATF6;UBA52;NGEF;ANAPC16;ENDOD1;AGAP3;IQGAP2;NYAP2;RIC8B;EPB41L1;SYNDIG1;GSG1L;PIP5K1B;CFAP65;VTI1B;S100A10;ABCA1;NDFIP2;PLK5;ARPP21;H3F3B;TIPARP;PLK2;EDEM1;THAP12;NETO2;GRIN2B;HNRNPM;CYLD;UCK2;CP…
Genes Down-Regulated In Striatal Cholinergic Interneurons Of HdhQ170 Vs HdhQ20 PMID32681824	321/973	2.56e-55	7.54e-54	0	0	3.33117	418.733	LPGAT1;WIPF3;FNBP1L;SLC4A4;RAVER2;PWWP2A;ANKS1B;MEF2A;EPHA4;MBNL2;ACTN2;LIMCH1;PRKCB;YOD1;SYTL5;RC3H2;KRT9;BCR;EML4;TIAM2;EML5;CARHSP1;GAREM1;HECW2;SPATA13;AKAP9;SIK3;TRIB3;RIN1;ATF6;NGEF;NEDD4L;STC1;IQGAP2;SEC14L1;RIC8B;FLRT2;ZFP180;D5ERTD579E;PENK;CHST15;TNRC18;ZBTB7A;RREB1;EXPH5;EGR1;CREBBP;PLK5;ARPP21;BCL11B;ZFP638;FAM78A;LRBA;PLK2;SETD1B;DDIT4L;NETO2;GRIN2B;PHC3;DCLK1;CYLD;UCK2;PPP1R1B;CCDC8…
Genes Down-Regulated In Foxp2/Olfm3-expressing Neurons Of R6/2 Vs WT PMID32681824	231/588	1.63e-54	4.73e-53	0	0	4.2981	532.335	SPON1;SERPINE2;WIPF3;PPP2R2A;ICAM5;FNBP1L;HTR4;SLC4A4;HS6ST2;ZFYVE28;RPS6KA3;PPP4R4;RPS6KA2;AGFG2;ANKS1B;EPHA4;UNC13A;PRKCB;ACTN2;SCAMP1;BCR;TIAM1;ADCY9;ADGRB2;HECW2;ADGRB1;KCNQ3;TLN2;NGEF;KCTD16;SPTBN4;PCDH15;NEDD4L;TGFA;ACTR3B;STRIP2;RIC8B;SEC14L1;PRKAR2B;D5ERTD579E;PENK;SYNDIG1;GSG1L;OTOF;KCNN2;CDK17;RABGAP1L;ARPP21;BCL11B;NEBL;NETO2;GRIN2B;DCLK1;CYLD;SLC6A6;STAG1;PPP1R1B;GALNTL6;CPEB2;PCSK2;R…
Genes Down-Regulated In Striatum Of HdhQ175 Mice GSE89505	521/1990	6.85e-54	1.97e-52	0	0	2.48422	304.106	TLNRD1;WIPF3;SCX;HTR4;FNBP1L;SLC4A4;ZFYVE28;CNST;SAMD15;AI593442;MSANTD1;SCN11A;AKT2;PPP4R4;RAVER2;IER5;ANKS1B;ZP3R;PRKCB;DDX11;COL23A1;FIBCD1;SYTL5;UPB1;DKK2;BCR;EML5;RBP4;HECW2;ASPHD2;ANKK1;ATF6;NGEF;PIF1;ZBTB8A;CHIA1;PNP2;NEDD4L;IQGAP2;XKRX;RHOT2;RIC8B;C7;FLRT3;ZFP180;LDHD;GSG1L;SFN;AMZ1;RREB1;VTI1B;S100A10;CDK17;MYH7B;NDFIP2;PLK5;ARPP21;TIPARP;PLK2;NR1D1;NETO2;WDR54;CYLD;SLC6A6;GIPC2;PLCH2;PR…
Down-regulated Proteins In Striatum Of 6 Mon HD Q175 Mice Vs Q20 PXD006302	174/373	9.42e-54	2.68e-52	0	0	5.73375	700.07	CYFIP2;SPON1;TLNRD1;PLXND1;UBXN2B;DGKB;WIPF3;PPP2R2A;SLC8A2;RPS6KA4;ZFYVE28;CNST;DACH1;RIMS3;FRRS1L;AKT2;PPP4R4;SACS;AGFG2;PPFIA3;ANKS1B;LZTS3;ACVR1;PPP1R16B;EPHA4;SLC30A3;ACTN2;PRKCB;ACTN1;LMO7;SHISA9;SHISA7;FOXP1;BCR;TIAM2;CACNB2;OLFM2;PCP4;SELENOM;GAREM1;ADGRB2;HECW2;AKAP9;RIN1;NPTXR;NGEF;DGKI;JCAD;KCTD16;DGKH;NECAB2;PNP2;NTM;TMEM121B;HPCA;ITPR1;AGAP3;RASGRP2;ACTR3B;CACNA1E;RAP1GAP;SEC14L2;DGU…
Genes Up-Regulated In Control iPSCs After 60 D Of Differentiation GSE109534	800/3580	1.28e-53	3.6e-52	0	0	2.10958	256.926	PID1;NEXMIF;PTPDC1;ZDBF2;SAMD14;LSM11;DPYSL4;AKT3;DPYSL3;NDST3;SAMD10;MEF2A;RBFOX2;HPCAL1;SCAMP1;FRS3;UPB1;RC3H2;RABL2;ATF6;ZBTB8A;MTMR3;MEAF6;LYPD1;AGAP3;NYAP2;SLC30A10;ADAMTS10;EPB41L1;PRKAR2B;D5ERTD579E;1110051M20RIK;AMZ1;ZBTB7C;JAG2;GPR12;CADM1;TIPARP;NEBL;NR2F1;NETO2;L1CAM;GRIN2B;SFXN3;NAPEPLD;DCHS1;PRRT4;DMRTC1A;GPR26;LRRC10B;KCNC3;SHB;SHD;LETM2;SMPD3;JPH4;TUBA1B;HEY1;SMPD1;NEFL;2610301B20R…
Striatum Protein Module pM2 (Blue) PMID26900923	231/596	2.78e-53	7.72e-52	0	0	4.2019	508.495	TLNRD1;WIPF3;PPP2R2A;ZFYVE28;RPS6KA4;RPS6KA3;CNST;PSMD5;AKT2;PPP4R4;CCDC97;AGFG2;ANKS1B;ACVR1;PRKCB;ACTN2;ACTN1;BOLA1;YOD1;BCR;TIAM2;ADCY9;GAREM1;HECW2;ADGRB1;AKAP9;RRAGD;SIK3;RIN1;NGEF;KCTD16;NECAB2;PNP2;AGAP3;ACTR3B;DGUOK;SEC14L3;STRIP2;SEC14L1;FLRT3;PENK;INPP5J;GSG1L;ZBTB7A;CDK17;BBS2;ARPP21;BCL11B;NEBL;PDE2A;ERLIN1;SUCO;NETO2;DCLK1;CYLD;CYP2S1;PPP1R1B;SFXN3;KYAT3;PTPRS;ACY1;TENM4;LRRC10B;GRIK…
Genes Up-Regulated In WT Vs R6/1 Both Treated With AAV2/1-control GSE139847	192/450	8.61e-52	2.37e-50	0	0	4.89708	575.806	CPNE9;CHRM1;PLXND1;DGKB;GM19410;PPP2R2A;SLC8A2;ZFYVE28;LAMP5;RGS4;SYNPR;AI593442;RASSF3;PPP4R4;DPF1;TBC1D30;CAR11;SLC26A10;IER5;ANKS1B;LZTS3;RGS7;KCNH3;KCNH4;PRKCB;IGFBP4;ACTN2;STARD8;FST;KCTD1;FOXP1;TRAIP;TIAM2;CACNB3;PCP4;OBSCN;HECW2;RRAGD;GPD1;KCNQ3;ASPHD2;NPTXR;RIN1;ATF6;NGEF;JCAD;DGKH;NECAB3;TMEM121B;NTM;HPCA;ITPR1;GPR83;RASGRP2;ACTR3B;RHOBTB2;KCNV1;SNN;SEC14L1;HRH3;PENK;GSG1L;DRD1;CLSPN;DRD…
Genes Down-Regulated In HD Markers In Human Caudate Nucleus GSE26927	613/2531	1.82e-51	4.96e-50	0	0	2.26759	264.927	CYFIP2;TLNRD1;PNMAL1;NEXMIF;SPINT2;ADARB1;HTR4;FNBP1L;ALKBH6;DCAF4;ZFYVE28;PCMT1;DPYSL4;AI593442;PPP4R4;4921524J17RIK;NDST3;ANKS1B;MEF2A;UNC13B;STARD4;RBFOX2;PRKCB;CACNA2D2;SOX11;SCAMP1;UPB1;GTPBP3;BCR;EML4;EML5;RBP4;ADCY9;ASPHD2;ENTHD1;FAR2;NGEF;SLBP;LRPAP1;MEAF6;NEDD4L;WDR61;FAM149A;RIC8B;ADAMTS19;EPB41L1;D5ERTD579E;CHST15;GSG1L;ST3GAL2;CDK17;NDFIP2;ARPP21;GPR12;PLK2;EDEM1;CDC7;NETO2;L1CAM;TMEM…
Genes Changed In iSPNs Of 6 Mon HdhQ170 Vs HdhQ20 PMID32681824	784/3531	4.17e-51	1.12e-49	0	0	2.08012	241.303	POP5;PID1;ALKBH6;ZFYVE28;ZDBF2;SAMD14;DPYSL4;PPP4R4;DPYSL3;SAMD10;HES6;PHKA1;BCR;RFX4;ORAI3;RBP1;ASPHD2;ATF6;NGEF;ZBTB8A;MTMR3;AGAP3;IQGAP2;EPB41L1;D5ERTD579E;SYNDIG1;CFAP65;ZBTB7A;VTI1B;ABCA1;TIPARP;NEBL;EDEM1;EIF2AK4;NETO2;GRIN2B;PKIB;UCK2;FAT1;NAPEPLD;EZH2;HRK;GPR26;BHLHE41;ARHGAP1;SHB;JPH4;TUBA1B;HEY1;NEFL;NELFB;2610301B20RIK;DLGAP2;UPF1;KCND2;DUSP1;ELOVL2;SLC39A10;ELOVL6;MRPL48;DYNLL1;PXDN;T…
Differentially Expressed Genes In R6/2 LNA-CTG Vs WT LNA-SCB Mice GSE85126	211/530	6.76e-51	1.8e-49	0	0	4.36913	504.728	CPNE9;ZFP606;HTR4;SLC4A4;ZDBF2;ZFYVE28;SOX3;AI593442;SCN11A;PPP4R4;AKT3;CPNE2;AGFG2;MUSK;ACTN2;ISLR2;SOX11;ZFP618;FNDC9;UPB1;KRT9;BCR;RBP4;ADCY9;RRAGD;KCNQ3;TRIB3;ANKK1;RIN1;ATF6;NGEF;PIF1;EPHA10;PPL;SEC14L3;SEC14L1;ADAMTS19;FLRT3;ZFP180;PENK;INPP5J;GSG1L;N4BP3;MYH7B;CREBBP;PLK5;ARPP21;GPR12;GADD45B;LRRN3;FAM78A;PCDH20;POU6F2;DDIT4L;NETO2;SMARCA1;DCLK1;CYLD;MEX3A;MYO5B;GIPC2;PPP1R1B;HRK;ACVRL1;PC…
Genes Changed In iSPNs Of zQ175DN Vs HdhQ20 PMID32681824	853/3964	2.73e-50	7.19e-49	0	0	2.01824	230.333	POP5;NEXMIF;PTPDC1;ZFYVE28;ZDBF2;DPYSL4;AKT2;PPP4R4;DPYSL3;NDST3;HES6;MRTFA;PHKA1;UPB1;BCR;EML4;ORAI3;ASPHD2;ATF6;NGEF;SAR1A;MEAF6;PDGFB;AGAP3;NYAP2;DEDD2;RHOT2;EPB41L1;D5ERTD579E;SYNDIG1;ZBTB7A;VTI1B;ZBTB7C;ABCA1;CADM1;TIPARP;NCAPH2;EDEM1;PBX2;EIF2AK4;NETO2;GRIN2B;NR2F6;UCK2;FAT1;NAPEPLD;HRK;ACHE;BHLHE41;SHB;LETM2;JPH4;PANX2;TUBA1B;MED13;HEY1;NEFL;SH3BGRL3;2610301B20RIK;DLGAP2;STUM;KCND2;ELOVL2;…
Genes Down-Regulated In Sst/Npy-expressing Interneurons Of HD Patients Vs Control PMID32681824	973/4709	2.77e-50	7.21e-49	0	0	1.95445	223.026	PID1;UXS1;NEXMIF;PTPDC1;ZDBF2;ZFYVE27;AKT2;PPP4R4;RAVER2;AKT3;PWWP2A;MEF2A;STARD4;RBFOX2;CACNA2D2;PHKA1;SCAMP1;RC3H2;EML4;EML5;RBP4;FAR1;FAR2;RABL2;ATF6;SKAP2;SF1;MTMR3;AGAP3;NYAP2;HSPH1;HLCS;ADAMTS19;PRKAR2B;EPB41L2;D5ERTD579E;1110051M20RIK;SYNDIG1;CFAP69;PIP5K1B;JAG2;B3GALNT2;CREBBP;PRPF38B;NEBL;LRBA;EDEM1;EIF2AK4;NETO2;L1CAM;GRIN2B;UCK2;SFXN3;FAT1;SFXN4;PSMG4;SFXN2;LIN54;BHLHE41;SMPD3;JPH4;TME…
Down-regulated Proteins In Striatum Of HD Q175 Mice PMID26900923	182/423	9.39e-50	2.42e-48	0	0	4.95524	559.396	CYFIP2;TLNRD1;PLXND1;UBXN2B;DGKB;WIPF3;PPP2R2A;ICAM5;CNDP2;GLE1;ZFYVE28;RPS6KA4;CNST;RIMS3;FRRS1L;AKT2;PPP4R4;CCDC97;STK32A;AGFG2;ANKS1B;LZTS3;PPP1R16B;SLC30A3;PRKCB;ACTN2;ACTN1;LMTK3;KCTD1;LMTK2;YOD1;LMO7;SHISA7;FOXP1;BCR;CACNB2;PLPP6;ACAP2;OLFM2;SELENOM;GAREM1;ADGRB2;HECW2;AKAP9;NPTXR;RIN1;NGEF;DGKI;DGKH;OSBP2;KCTD16;NECAB2;PNP2;CTTNBP2;NTM;HPCA;ITPR1;AGAP3;IQGAP2;HNRNPLL;RASGRP2;ACTR3B;CACNA1E…
Genes Down-Regulated In Expression In Cerebrum Of 22 Wk R6/1 HD Mice GSE3621	218/566	9.76e-50	2.49e-48	0	0	4.14214	467.443	CPNE9;OXTR;CPNE7;WIPF3;ADARB2;HTR4;AI593442;RASSF3;DPF1;IER5;PRKCB;ACTN2;STARD8;ACTN1;SOX11;SLC6A11;TIAM2;ADCY9;GAREM1;DAAM1;ADGRB2;ADGRB1;RIN1;NGEF;KCTD16;NECAB2;NECAB3;SLC35D3;LYPD1;IQGAP2;SEC14L1;LDHD;PENK;GSG1L;KCNN1;OTOF;1500009C09RIK;NTSR2;EGR1;PLK5;ARPP21;BCL11B;EGR4;PLK2;PDE2A;DDIT4L;DCLK1;NET1;MYO5B;PPP1R1B;GALNTL6;HRK;PCSK2;RYR1;CDKN1A;DOC2B;JPH4;SMPD3;TRIM9;CAMKV;TMEM44;ENC1;RSPO1;ZFP3…
Down-regulated Genes In R6/2 LNA-CTG Vs WT LNA-SCB Mice GSE85126	179/415	3.97e-49	1e-47	0	0	4.97251	554.178	CPNE9;ANKRD35;HTR4;SLC4A4;FGF3;SLC8A2;ZDBF2;ZFYVE28;RGS4;AI593442;SCN11A;FRRS1L;PPP4R4;AKT3;CAR11;SLC26A10;CPNE2;STK32A;AGFG2;PPP1R16B;KCNH3;KCNH4;TLE2;MUSK;ACTN2;FST;TPM2;E230025N22RIK;FNDC9;UPB1;TLE6;SHISA7;FOXP1;TRAIP;KRT9;BCR;CACNB2;RBP4;PCP4;ADCY9;SLC9A5;DOK3;RRAGD;GPD1;KCNQ3;TRIB3;ANKK1;RIN1;ATF6;NGEF;JCAD;PIF1;EPHA10;TMEM121B;CHRNA7;HPCA;ITPR1;GPR83;RHOBTB2;SEC14L3;SEC14L1;HRH3;SOHLH1;FLRT…
Genes Down-Regulated In Foxp2/Olfm3-expressing Neurons Of zQ175DN Vs WT PMID32681824	184/435	5.66e-49	1.42e-47	0	0	4.81099	534.466	RIPOR2;SPON1;GALNT13;SERPINE2;ATP8A1;WWC1;WIPF3;GPR63;RORA;PPP2R2A;ADARB2;HTR4;SLC4A4;GPATCH8;HS6ST2;ZFYVE28;RPS6KA3;PPP4R4;CAR11;LZTS3;RGS7;TLE4;KIRREL3;EPHA4;MBNL2;RBFOX2;UNC13A;COL27A1;PRKCB;ACTN2;TPM1;KCTD1;LMTK2;SYTL5;FOXP1;BCR;CACNB2;PCP4;OLFM3;GAREM1;ADGRB2;HECW2;ADGRB1;AKAP9;SIK3;TNIK;TLN2;ATF6;NGEF;DGKH;KANK3;KCTD16;KMT2A;EPB41;CTTNBP2;ARL3;ITPR1;PCDH15;NEDD4L;TGFA;NYAP2;RAP1GAP;RHOBTB2;…
Top Neuron-Enriched Genes In Humans And Mice PMID29892006	317/1018	1.94e-48	4.81e-47	0	0	3.0457	334.603	CYFIP2;PNMAL1;TMEM200A;CPNE7;WIPF3;1700001L19RIK;ADARB1;ADARB2;FNBP1L;HS6ST2;HS6ST3;ZDBF2;SYNPR;DPYSL4;AI593442;DPYSL3;NDST3;RESP18;STMN1;KIFAP3;ANKS1B;EPHA4;RBFOX2;ATP6V1G2;EPHA6;UNC13A;PRKCB;SLC6A15;CACNA2D2;SOX11;FNDC9;SYTL5;TIAM2;EML5;HECW2;RRAGD;KCNQ3;KCTD16;BEX2;EPHA10;IGSF3;TMEM63C;6430548M08RIK;TMTC1;NYAP2;5730409E04RIK;FLRT2;INPP5F;PRKAR2B;FLRT3;PENK;CFAP69;KCNN2;SCN3B;SCN3A;RAB11FIP4;GP…
Genes Up-Regulated In Control iPSCs After 80 D Of Differentiation GSE109534	940/4543	2.29e-48	5.61e-47	0	0	1.94153	212.979	PID1;NEXMIF;PTPDC1;ZDBF2;SAMD14;ZFYVE27;LSM11;DPYSL4;AKT3;DPYSL3;NDST3;LIPG;SAMD10;MEF2A;HES6;RBFOX2;HPCAL1;FRS3;UPB1;RC3H2;RABL2;ATF6;NGEF;MTMR3;MEAF6;TARSL2;LYPD1;AGAP3;NYAP2;SLC30A10;ADAMTS10;EPB41L1;PRKAR2B;D5ERTD579E;1110051M20RIK;CFAP69;CFAP65;AMZ1;ZBTB7C;JAG2;MYH7B;GPR12;CADM1;TIPARP;MTERF2;NEBL;EDEM1;NR2F1;NETO2;L1CAM;GRIN2B;FXYD2;SFXN3;NAPEPLD;DCHS1;PRRT4;DMRTC1A;ACHE;GPR26;LRRC10B;KCNC3…
Genes Down-Regulated In Expression In 15 Wk R6/2 HD Mice GSE38219	1004/4952	3.56e-48	8.66e-47	0	0	1.9114	208.827	POP5;SCX;ZFYVE28;DPYSL4;AKT2;PPP4R4;AKT3;LIPG;PWWP2A;PKNOX1;MEF2A;HES6;STARD4;STARD8;FIBCD1;HPCAL1;CACNA2D2;SCAMP1;RBP4;RFX4;ORAI2;FAR1;FAR2;RABL2;ATF6;PLBD2;NGEF;SF1;SAR1A;TARSL2;PDGFB;LYPD1;AGAP3;SLC30A10;HSPH1;EPB41L1;RDH11;PRKAR2B;EPB41L2;SYNDIG1;CFAP69;PIP5K1B;ZBTB7A;EXPH5;VTI1B;ZBTB7C;CADM1;TIPARP;NEBL;LRBA;NR2F1;ERLIN1;PBX2;NETO2;DAZL;UCK2;HRK;PIGS;BHLHE41;SMPD3;JPH4;TMEM47;HEY1;TMEM44;NEF…
Genes Down-Regulated In HD Grade 2 Markers In Human Caudate Nucleus (HG-U133A) GSE3790	271/811	1.01e-47	2.43e-46	0	0	3.35016	362.526	CYFIP2;PNMAL1;GDE1;ICAM5;ADARB1;HTR4;FNBP1L;PCMT1;DPYSL4;NDST3;LGALS8;KIFAP3;RBFOX2;ATP6V1G2;MBNL2;ACTN2;PRKCB;ACTN1;SCAMP1;BCR;RBP4;ADCY9;ADGRB2;SUB1;MAP1A;FAR2;MXRA7;NECAB2;LRPAP1;BEX2;NEDD4L;6430548M08RIK;ACTR3B;FAM149A;DGUOK;HSPH1;RIC8B;INPP5F;EPB41L1;PRKAR2B;PENK;CHST15;SCN3B;SCN3A;EGR1;RABGAP1L;NDFIP1;EGR4;LRRN3;ARPP21;BCL11B;PLK2;PDE2A;NETO2;L1CAM;HSPA12A;DCLK1;CYLD;CALY;CCDC88C;CALM3;CALM…
Genes Changed In Striatal Cholinergic Interneurons Of HdhQ170 Vs HdhQ20 PMID32681824	368/1275	1.22e-47	2.91e-46	0	0	2.75588	297.694	LPGAT1;WIPF3;HDAC11;TONSL;GDE1;FNBP1L;ALKBH6;SLC4A4;RAVER2;PWWP2A;TUNAR;ANKS1B;MEF2A;EPHA4;ATP6V1G2;MBNL2;ACTN2;LIMCH1;PRKCB;YOD1;SYTL5;RC3H2;KRT9;BCR;EML4;TIAM2;EML5;CARHSP1;GAREM1;HECW2;SPATA13;AKAP9;SIK3;TRIB3;RIN1;ATP6V0D1;ATF6;NGEF;NEDD4L;STC1;IQGAP2;SEC14L1;RIC8B;FLRT2;ZFP180;D5ERTD579E;PENK;CHST15;TNRC18;ZBTB7A;RREB1;EXPH5;EGR1;CREBBP;NDFIP1;PLK5;ARPP21;BCL11B;ZFP638;FAM78A;LRBA;PLK2;SETD1…
Genes Changed In Cerebellum Of 12 Week Old ATXN1[82Q] Vs WT GSE122099	399/1433	1.61e-47	3.8e-46	0	0	2.63462	283.873	CYFIP2;PID1;TLNRD1;SERPINE2;FNBP1L;ZDBF2;ZFYVE28;PPP4R4;AKT3;DPYSL3;NDST3;HOMER3;ANKS1B;UNC13A;WSB2;HPCAL1;CACNA2D2;B630019K06RIK;ORAI2;FAR2;MAML3;ASTN2;NGEF;ENDOD1;NEDD4L;AGAP3;IQGAP2;EPB41L1;RDH11;EPB41L2;SYNDIG1;ZBTB7A;RREB1;ST3GAL2;EXPH5;LHPP;ABCA1;B3GALNT2;PLK5;CADM1;ARPP21;NEBL;THAP12;NETO2;GPR137C;PKIB;SLC6A6;CPEB1;MEX3A;DCHS1;PLCH2;CPEB2;PAM;HRK;PIGS;KCNC3;BHLHE41;ABCC12;TRIM9;ZFP385C;TIM…
Differentially Expressed Genes In Striatum Of Foxp1 KO Vs WT Mice GSE62718	203/522	4.41e-47	1.03e-45	0	0	4.19039	447.275	OXTR;PID1;TMEM200A;CPNE7;ADARB1;RXFP3;ZFYVE28;RPS6KA4;CNST;PPP4R4;NDST3;TUNAR;ACTN2;DDX11;STARD8;ACTN1;DKK2;KRT9;BCR;THEG;ASPHD2;ACOT5;NGEF;CCNO;TRIM11;NECAB2;GRB7;ZBTB8A;EPHA10;IGSF3;PNP2;EPB41;TGFA;SEC14L3;RIC8B;SEC14L1;XRRA1;OTOF;PIP5K1B;KCNN2;AMZ1;RREB1;EXPH5;ZBTB7C;EGR4;FAM78A;PCDH20;DDIT4L;NR1D1;NMBR;TMEM196;RPE65;PKIB;SLC6A6;KLHDC8A;FXYD2;CCDC88C;NAPEPLD;PRRT4;ACVRL1;RYR1;CDKN1A;ACY1;SHB;S…
Genes Changed In HdhQ150 Vs WT Mice GSE139847	186/455	7.09e-47	1.64e-45	0	0	4.53655	482.065	CCDC71L;CPNE9;FAAH;OXTR;TMEM200A;CPNE7;WIPF3;NPY2R;GM19410;FGF3;ZDBF2;ZFYVE28;RPS6KA4;RGS4;PPP1CC;AI593442;RASSF3;PPP4R4;OGFOD1;NDST3;CAR11;SLC26A10;IER5;LZTS3;PPP1R16B;KCNH4;PRKCB;ACTN2;DDX11;TPM2;COL23A1;HPCAL1;KCTD1;SOX11;ZFP618;KCTD4;UPB1;FOXP1;KRT9;BCR;RBP4;PCP4;GPRIN1;NPTXR;NGEF;JCAD;SLC35D3;HPCA;TCF7;LYPD1;ITPR1;PCDH15;ILDR2;TGFA;AK4;GPR83;BHLHE22;RASGRP2;RAP1GAP;RHOBTB2;TRP53I11;SEC14L3;S…
Genes Down-Regulated In Cerebellum Of 12 Week Old Atxn1[154Q/2Q] Vs WT GSE122099	377/1329	7.17e-47	1.65e-45	0	0	2.69249	286.084	PATJ;TLNRD1;SPARC;SERPINE2;PNMAL1;TMEM200A;CPNE7;HDAC11;1700001L19RIK;STMN4;ICAM5;HTR4;ADARB2;RXFP3;ZDBF2;ADGRA1;AI593442;PPP4R4;OGFOD1;RESP18;STMN1;HOMER3;AGFG2;ANKS1B;EPHA6;PAQR7;WSB2;FBXO2;FIBCD1;ZFP976;HPCAL1;CACNA2D2;SOX11;SLC6A11;FNDC9;PLPP6;GPR165;CARHSP1;DAAM2;ADGRB1;SIK3;FAR2;KCTD12;MXRA7;RIN1;NGEF;PLBD2;KCTD16;NECAB3;EPHA10;SLC35D3;LYPD1;PCDH15;STC1;TMTC1;NKAIN2;ABR;EPB41L1;PRKAR2B;PCBP…
R6/1 Vs WT Striatum Down-Regulated Genes PMID28743452	111/191	1.25e-46	2.84e-45	0	0	8.9452	945.47	PLXND1;SLC4A4;RPS6KA4;ZFYVE28;PPP4R4;CAR11;STK32A;AGFG2;ACVR1;PPP1R16B;KCNH3;ACTN2;PRKCB;ACTN1;KCTD1;CACNB3;HECW2;AKAP9;GPD1;RRAGD;KCNQ3;ROR1;RIN1;OSBP2;ZBTB8A;NTM;HPCA;ITPR1;SLC41A1;TGFA;GPR83;RASGRP2;RHOBTB2;ATXN1;SEC14L1;HRH3;INPP5J;OTOF;CLSPN;DRD1;DRD2;SKIL;MARK2;SYT2;DDIT4L;FANCB;NETO2;FBXO32;ARHGAP33;GIPC2;PPP1R1B;RYR1;CNTNAP1;MTCL1;GRM1;RERG;SMPD3;TRIM9;ZCWPW1;CAMKV;TMEM44;PMEPA1;NEFM;CAP1…
Genes Down-Regulated In Striatal Cholinergic Interneurons Of HdhQ111 Vs HdhQ20 PMID32681824	333/1116	2.2e-46	4.96e-45	0	0	2.86886	301.605	LPGAT1;WIPF3;FNBP1L;SLC4A4;ZDBF2;RPS6KA3;AI593442;RAVER2;DAG1;PWWP2A;ANKS1B;MEF2A;EPHA4;MBNL2;ACTN2;LIMCH1;ACTN1;YOD1;SCAMP1;SYTL5;RC3H2;KRT9;BCR;TIAM2;CARHSP1;GAREM1;HECW2;SPATA13;AKAP9;XRN2;SIK3;TRIB3;TLN2;ATF6;NGEF;CCNO;SF1;KCTD16;TGFA;NEDD4L;STC1;SLC30A10;RIC8B;FLRT3;D5ERTD579E;PENK;CHST15;TNRC18;KCNN3;ZBTB7A;SCN3A;RREB1;ABCA1;EGR1;CREBBP;RABGAP1L;PLK5;ARPP21;BCL11B;ZFP638;FAM78A;LRBA;PLK2;DD…
Genes Down-Regulated In Cerebellum Of 12 Week Old ATXN1[82Q] Vs WT GSE122099	294/934	6.93e-46	1.55e-44	0	0	3.07653	319.908	CPNE9;CYFIP2;FAAH;LPGAT1;TLNRD1;ZFYVE28;RPS6KA3;PPP4R4;AKT3;NDST3;HOMER3;CPNE2;SCN1B;AGFG2;ANKS1B;ATP6V1G2;PAQR7;UNC13A;WSB2;HPCAL1;CACNA2D2;MFSD12;PLPP6;TIAM1;FNDC4;RRAGD;ORAI2;FAR2;KCTD12;MAML3;ASTN2;GRB7;EPB41;TMEM63C;NEDD4L;6430548M08RIK;AGAP3;STRIP2;EPB41L1;RDH11;PCBP4;SYNDIG1;DYM;TSPAN5;1500009C09RIK;ZBTB7A;RREB1;RAB11FIP4;ST3GAL2;EXPH5;LHPP;B3GALNT2;EGR1;PLK5;LRRN3;ARPP21;THAP12;PARVA;NETO…
Differentially Expressed Genes In Hippocampus Of Foxp1 KO Vs WT Mice GSE62718	550/2267	7.95e-46	1.76e-44	0	0	2.23724	232.328	CYFIP2;POP5;PATJ;SERPINE2;WIPF3;SCX;HTR4;FNBP1L;PTPDC1;ZDBF2;ZFYVE28;SAMD14;LSM11;AKT3;RAVER2;LIPG;HOMER3;MEF2A;UNC13B;RNF138RT1;WSB2;COL23A1;FIBCD1;CACNA2D2;B630019K06RIK;SYTL5;UPB1;ZC2HC1C;GPR165;ADCY9;ORAI3;ORAI2;ACOT2;ASPHD2;FAR2;ASTN2;ATF6;ACOT5;ACOT4;ACOT3;ABCB4;LYPD1;AGAP3;IQGAP2;FAM149A;TERT;FLRT3;PRKAR2B;SYNDIG1;CFAP69;PIP5K1A;AMZ1;ST3GAL2;LHPP;EXPH5;ZBTB7C;S100A10;FZD1;ARPP21;GPR12;NEBL…
Mouse Spiny Projection Neurons-Enriched Genes PMID30811995	295/946	3.89e-45	8.55e-44	0	0	3.03405	310.252	CPNE8;TLNRD1;RPL31;PPP2R2A;HS6ST2;ZDBF2;RPS6KA3;CNST;AI593442;PPP4R4;CHORDC1;DPF1;MEF2A;MBNL2;ACTN2;MRTFA;FNDC9;RC3H2;DSG1C;TIAM2;PLPP6;TIAM1;RBP4;CARHSP1;SPATA13;AKAP9;RRAGD;ORAI2;TLN2;RIN1;NECAB2;PIF1;GRB7;BEX3;BEX2;SAR1A;TARSL2;MAGED1;ZFP868;ZFP503;NEDD4L;NYAP2;ACTR3B;FAM171A1;STRIP2;HSPH1;SEC14L1;RIC8B;INPP5F;PRKAR2B;FLRT3;PENK;SYNDIG1;CHST15;RRS1;SCN3B;SCN3A;BBS2;EGR1;NDFIP1;GPR12;LRRN3;ARPP…
Genes Down-Regulated In HD Markers In Human Caudate Nucleus (HG-U133B) E-AFMX-6	203/536	5.38e-45	1.17e-43	0	0	4.01089	408.847	GDE1;ADARB1;ICAM5;FNBP1L;HTR4;PCMT1;DPYSL4;NDST3;LGALS8;MBNL2;RBFOX2;ATP6V1G2;PRKCB;ACTN2;ACTN1;SCAMP1;BCR;RBP4;ADCY9;ADGRB2;SUB1;FAR2;MXRA7;LRPAP1;BEX2;NEDD4L;6430548M08RIK;ACTR3B;FAM149A;RIC8B;INPP5F;PRKAR2B;PENK;CHST15;SCN3B;SCN3A;EGR1;ARPP21;BCL11B;EGR4;LRRN3;PLK2;PDE2A;NETO2;L1CAM;DCLK1;CALY;CCDC88C;CALM3;PCSK2;ACHE;TENM1;PTPRO;RYR3;SMPD3;PPP3CB;CAMKV;ENC1;NEFL;PHF24;NEFM;DLGAP2;NEFH;ZFP365;…
Differentially Expressed Proteins In Striatum Of 6 Mon HD Q175 Mice Vs Q20 PXD006302	230/654	1.29e-44	2.76e-43	0	0	3.58753	362.562	CYFIP2;SPON1;TLNRD1;RPL31;WIPF3;DCAF8;PPP2R2A;PTPDC1;ZFYVE28;RPS6KA4;CNST;AKT2;PPP4R4;OGFOD1;AGFG2;ANKS1B;ACVR1;DYNC2H1;EPHA4;PRKCB;ACTN2;COG5;ACTN1;CIRBP;BCR;TIAM2;GAREM1;ADGRB2;HECW2;AKAP9;ACOT1;RIN1;NGEF;KCTD16;NECAB2;GCDH;ADCYAP1R1;PNP2;AGAP3;ACTR3B;SEC14L2;DGUOK;SEC14L3;STRIP2;SEC14L1;FLRT3;RDH11;1110051M20RIK;PENK;INPP5J;KCNN2;ZBTB7A;PCK2;BBS2;BCL11B;PDE2A;ERLIN1;NETO2;CYLD;UCK1;PPP1R1B;SFX…
Genes Changed In Striatal Cholinergic Interneurons Of HdhQ111 Vs HdhQ20 PMID32681824	425/1605	1.29e-44	2.76e-43	0	0	2.46392	249.005	POP5;WIPF3;DCAF8;FNBP1L;ALKBH6;SLC4A4;ZDBF2;AI593442;RAVER2;PWWP2A;ANKS1B;MEF2A;MBNL2;WSB2;SCAMP1;SYTL5;RC3H2;BCR;HECW2;MAP1A;ATF6;NGEF;ATF4;SF1;NAA60;CTBP1;NEDD4L;SLC30A10;RIC8B;FLRT3;D5ERTD579E;CHST15;ZBTB7A;RREB1;ABCA1;CREBBP;ACD;PLK5;ARPP21;NCAPH2;PLK2;LRBA;NETO2;L1CAM;PHC3;GRIN2B;CYLD;ARL2BP;SFXN3;FNDC10;CDK13;CPEB2;EZH2;HRK;LIN54;SETD2;GPR26;LRRC10B;CLTB;TCF20;LYST;NHSL2;MED13;TMEM44;NEFL;S…
Differentially Expressed Genes In Cortex Of 6 Mon HD Q140 Mice Vs Q20 GSE78272	229/651	1.92e-44	4.08e-43	0	0	3.58788	361.156	PATJ;FAAH;STMN4;PPP2R2A;HTR4;NUDT4;CNST;PPP4R4;TUNAR;PDK1;UNC13B;ACTN2;COL23A1;RSAD1;CACNA2D2;ACSL5;SLC6A11;FNDC9;UPB1;MTURN;DSG1C;BCR;TIAM2;AKAP9;RRAGD;SPATA13;MAML3;ANKK1;NGEF;SLC35D3;ZFP503;ENDOD1;STC1;TGFA;FAM171A1;STRIP2;RIC8B;5730409E04RIK;INPP5F;ADAMTS19;PRKAR2B;PENK;VPS8;CHST15;TRPM4;GM10471;PLK5;ARPP21;BCL11B;MTERF2;NR2F1;NMBR;CYLD;CYP2S1;PPP1R1B;PAM;RYR1;ACHE;ZFP367;LRRC10B;SLC35F5;LYST…
Genes Changed In Striatum Of HdhQ175 Mice GSE89505	715/3249	2.67e-44	5.62e-43	0	0	2.01672	202.34	PID1;TLNRD1;TMEM200A;NEXMIF;WIPF3;SCX;SPINT2;HTR4;FNBP1L;SLC4A4;PTPDC1;ZFYVE28;SAMD14;CNST;SAMD15;MSANTD1;AI593442;SCN11A;AKT2;PPP4R4;RAVER2;DPYSL3;NDST3;IER5;ZP3R;ANKS1B;RNF138RT1;HES6;PRKCB;DDX11;COL23A1;FIBCD1;B630019K06RIK;SOX11;SYTL5;UPB1;DKK2;BCR;EML5;RBP4;GPR165;HECW2;SPIN2C;ACOT1;ASPHD2;ANKK1;ATF6;ATF3;NGEF;PIF1;ZBTB8A;CHIA1;PNP2;NEDD4L;TAPBPL;IQGAP2;XKRX;RHOT2;RIC8B;C7;TERT;ADAMTS19;FLRT…
Down-regulated Genes In Striatum Of Foxp1 KO Vs WT Mice GSE62718	130/261	2.79e-44	5.82e-43	0	0	6.42464	644.315	CDH8;CEP128;RPS6KA4;ZFYVE28;CNST;PPP4R4;ARHGDIB;CAR11;LZTS3;KCNH4;DGAT2;ACTN2;ACTN1;DDX11;DKK2;TMEM252;KRT9;FOXP1;TRAIP;BCR;SLC9A2;THEG;TPST1;EHBP1L1;ASPHD2;CCNO;NGEF;TRIM11;JCAD;NECAB2;COL17A1;GRB7;ZBTB8A;ISYNA1;ZFP467;EPB41;PNP2;HPCA;PLD5;TGFA;PLCXD1;FOXO1;RAP1GAP;SEC14L3;KLC3;RIC8B;SEC14L1;HRH3;XRRA1;CLSPN;AMZ1;RREB1;BC055324;EGR4;FAM78A;DDIT4L;NR1D1;FANCB;FBXO32;RPE65;ARHGAP33;SLC6A6;FXYD2;CC…
R6/1 Vs WT Striatum Changed Genes PMID28743452	119/225	4.31e-44	8.91e-43	0	0	7.24849	723.788	PLXND1;FAIM2;SAT2;SPINT2;SLC4A4;RPS6KA4;ZFYVE28;PPP4R4;CAR11;STK32A;AGFG2;ACVR1;PPP1R16B;KCNH3;ACTN2;PRKCB;ACTN1;KCTD1;CACNB3;HECW2;AKAP9;RRAGD;GPD1;KCNQ3;ROR1;RIN1;OSBP2;ZBTB8A;NTM;HPCA;ITPR1;TGFA;SLC41A1;GPR83;RASGRP2;RHOBTB2;SEC14L1;ATXN1;HRH3;INPP5J;OTOF;CLSPN;DRD1;DRD2;SKIL;MARK2;SYT2;PCDH20;DDIT4L;NETO2;FANCB;FBXO32;ARHGAP33;GIPC2;PPP1R1B;RYR1;CNTNAP1;MTCL1;GRM1;RERG;SMPD3;EPB41L4B;TRIM9;ZC…
Down-regulated Genes In Cortex Of 6 Mon HD Q140 Mice Vs Q20 GSE78272	175/429	5.61e-44	1.15e-42	0	0	4.50515	448.662	PATJ;GM7361;ZBTB20;PPP2R2A;HTR4;FGF3;DOCK10;PPP1CC;CNST;DACH1;PPP4R4;TUNAR;CAR11;STK32A;PPTC7;ACTN2;CACNA2D2;KCTD1;SLC6A11;FNDC9;SHISA9;UPB1;TRAIP;DSG1C;POU3F4;BCR;TIAM2;CACNB2;PCP4;AKAP9;RRAGD;SPATA13;ADAM12;MAML3;ANKK1;NGEF;OLFR1393;SLC35D3;ZFP503;HPCA;TCF7;ENDOD1;PLD5;STC1;TGFA;GPR83;KLHL13;NDRG2;NTS;RASGRP2;RAP1GAP;SLC9A3R2;FAM171A1;STRIP2;ASIC4;RIC8B;BAG5;INPP5F;ADAMTS19;PRKAR2B;PENK;CHST15;…
Top Neuron-Specific Genes In Humans And Mice PMID29892006	307/1019	1.33e-43	2.71e-42	0	0	2.89034	285.343	CPNE9;CYFIP2;OXTR;PNMAL1;TMEM200A;CPNE7;WIPF3;1700001L19RIK;TEX47;SPINT2;ADARB1;ADARB2;HS6ST3;ZDBF2;PCMT1;SYNPR;CNST;DPYSL4;AI593442;NDST3;RESP18;KIFAP3;RBFOX2;ATP6V1G2;EPHA6;UNC13A;PRKCB;SLC6A15;FIBCD1;CACNA2D2;ISLR2;SCAMP1;FNDC9;SYTL5;EML5;KCTD16;SPTBN4;BEX2;MEAF6;EPHA10;IGSF3;NEDD4L;6430548M08RIK;NYAP2;CRHR1;5730409E04RIK;INPP5F;PRKAR2B;FLRT3;PENK;CFAP69;SCN3B;NDFIP1;GPR12;ARPP21;BCL11B;MAGEE2…
Genes Down-Regulated In CAG Length-Dependent Genes In 6 Mon Mouse Cortex PMID26900923	282/902	2.39e-43	4.82e-42	0	0	3.03512	297.868	CPNE9;SLC23A3;LPGAT1;UXS1;PITPNA;ADARB1;HTR4;SLC4A4;ZFYVE28;SYNPR;CNST;RASSF3;AI593442;MSANTD1;PPP4R4;HABP4;PTGFRN;SCN1B;AGFG2;ACVR1;STARD4;ATP6V1G2;PRKCB;STARD8;SCAMP1;SYTL5;UPB1;KRT9;HECW2;RRAGD;MXRA7;ANKK1;ASTN2;ATF6;1700016K19RIK;ATF3;NGEF;ATF4;KCTD16;NECAB2;NECAB3;ZBTB1;6430548M08RIK;TMTC1;ACTR3B;ABR;SEC14L1;PENK;INPP5J;TSPAN5;GSG1L;OTOF;CDK17;EGR1;PLK5;ARPP21;GADD45B;TIPARP;PLK2;ERLIN1;DDIT…
Up-regulated Genes In Striatum Of 6 Mon HD Q175 Mice Vs Q20 PMID26900923	678/3053	4.57e-43	9.14e-42	0	0	2.026	197.52	TRIR;PID1;PNMAL1;NEXMIF;A430005L14RIK;RAPH1;1700001L19RIK;SPINT2;DCAF5;PTPDC1;GLDN;RXFP3;GCSH;PCMT1;COMTD1;SAMD14;DPYSL4;DPYSL3;NDST3;WDR91;STMN1;SAMD10;UNC13B;HES6;STARD7;B630019K06RIK;SOX11;GPR162;GPR165;DAAM1;ARMC6;ACOT2;ACOT1;FAR2;RABL2;VPS28;RNF122;SKAP2;SLBP;CTBP1;ABCB4;FLII;TAPBPL;NYAP2;SLC30A10;FLRT2;TERT;RDH11;ADAMTS19;CFAP69;PIP5K1B;CFAP65;SLC19A1;EXPH5;ZBTB7C;FZD1;GM10471;NDFIP1;GTF2IR…
Genes Up-Regulated In Mouse Brain Derived OPCs From P7 Vs E13.5 Mice PMID30078729	611/2668	1.14e-42	2.27e-41	0	0	2.08639	201.492	CYFIP2;SERPINE2;PNMAL1;NEXMIF;SCX;EMC10;HTR4;ZFYVE28;DPYSL4;AI593442;PPP4R4;MPV17;ANKS1B;RNF138RT1;PRKCB;STARD7;B630019K06RIK;SCAMP1;GPR162;GPR165;HECW2;MAP1A;ACOT2;ASPHD2;FAR2;ASTN2;NGEF;TARSL2;ABCB4;LYPD1;PDGFB;ENDOD1;TAPBPL;FAM149A;FAM124A;EPB41L1;PRKAR2B;EPB41L2;LDHD;S100A13;GSG1L;AMZ1;ZBTB7C;MYH7B;NDFIP1;ARPP21;CADM1;NEBL;NR1D1;NETO2;ELL2;TMEM196;PKIB;CYLD;GLUD1;CPEB1;ARL2BP;PCDHB6;PCDHB5;PR…
CAG Length-Dependent Proteins In 6 Mon Mouse Striatum PMID26900923	363/1310	1.58e-42	3.11e-41	0	0	2.59184	249.474	CYFIP2;SPON1;PATJ;FAAH;TLNRD1;RPL31;WIPF3;DCAF8;PPP2R2A;ICAM5;DCAF5;PTPDC1;ZFYVE28;GLE1;RPS6KA4;GOLGA4;CNST;DPYSL4;ADGRA1;AKT2;PPP4R4;DPYSL3;RAVER2;WDR91;CCDC97;AGFG2;ANKS1B;PDK1;DYNC2H1;MCCC2;EPHA4;ACTN2;PRKCB;COG5;ACTN1;BOLA1;B630019K06RIK;YOD1;CMBL;SYTL5;BCR;TIAM2;CARHSP1;GAREM1;ADGRB2;HECW2;ADGRB1;AKAP9;SIK3;ACOT1;RABL2;RIN1;NGEF;KCTD16;NECAB2;GCDH;PCDH10;PNP2;AGAP3;IQGAP2;ACTR3B;SEC14L2;SEC1…
Genes Down-Regulated In Expression In Striatum Of P62 KO; R6/2 HD Mice Vs P62 KO Mice GSE62210	125/252	2.28e-42	4.46e-41	0	0	6.36156	609.978	CPNE9;PLXND1;GM19410;MSMO1;SLC8A2;ZFYVE28;RGS4;AI593442;PPP4R4;SLC16A6;CAR11;AGFG2;LZTS3;PPP1R16B;KCNH3;KCNH4;ACTN2;IGFBP4;TPM1;KRT9;TRAIP;RBP4;CACNB3;GAREM1;OBSCN;SLC9A5;AKAP9;GPD1;RIN1;ATF6;NGEF;JCAD;INSIG1;TMEM121B;HPCA;ITPR1;GPR83;IQGAP2;RASGRP2;FOXO1;RHOBTB2;SEC14L1;HRH3;PENK;INPP5J;GSG1L;CLSPN;DRD1;IGFBP6;DRD2;PLK5;GPR12;RASL10A;HTR1D;DDIT4L;HTR1B;NETO2;DGAT2L6;ARHGAP33;SYNDIG1L;PPP1R1B;ACV…
Genes Up-Regulated In Control iPSCs After 100 D Of Differentiation GSE109534	927/4616	1.55e-41	3.02e-40	0	0	1.84514	173.378	PID1;NEXMIF;PTPDC1;ZDBF2;SAMD14;ZFYVE27;LSM11;DPYSL4;AKT3;DPYSL3;NDST3;LIPG;SAMD10;MEF2A;RBFOX2;HPCAL1;FRS3;UPB1;RC3H2;RFX4;RABL2;ATF6;NGEF;MTMR3;MEAF6;TARSL2;PDGFB;LYPD1;AGAP3;NYAP2;SLC30A10;ADAMTS10;C7;EPB41L1;PRKAR2B;D5ERTD579E;1110051M20RIK;CFAP69;CFAP65;AMZ1;ZBTB7C;JAG2;MYH7B;GPR12;CADM1;TIPARP;NEBL;NR2F1;NETO2;L1CAM;GRIN2B;FXYD2;SFXN3;NAPEPLD;DCHS1;PRRT4;DMRTC1A;ACHE;GPR26;LRRC10B;BHLHE41;S…
Genes Down-Regulated In HdhQ150 Vs WT Mice GSE139847	140/316	3.54e-40	6.82e-39	0	0	5.15579	468.342	CPNE9;WIPF3;GM19410;FGF3;RPS6KA4;ZFYVE28;RGS4;PPP1CC;AI593442;RASSF3;PPP4R4;CAR11;SLC26A10;IER5;LZTS3;PPP1R16B;KCNH4;ACTN2;PRKCB;DDX11;TPM2;KCTD1;UPB1;KRT9;FOXP1;BCR;RBP4;PCP4;NGEF;JCAD;SLC35D3;HPCA;TCF7;ITPR1;TGFA;GPR83;RASGRP2;RAP1GAP;RHOBTB2;SEC14L3;STRIP2;ASIC4;SEC14L1;HRH3;ZFP180;PENK;INPP5J;MAP7;GSG1L;CLSPN;DRD1;N4BP3;DRD2;PLK5;SYT2;EGR4;RASL10B;ARHGEF39;DDIT4L;SLC4A11;NETO2;MAFA;SYNDIG1L;C…
Genes Down-Regulated In Expression In Striatum Of 5 Mon R6/2 HD Mice GSE26317	142/327	1.62e-39	3.1e-38	0	0	4.9762	444.453	CPNE9;TLNRD1;ANKRD35;PPP2R2A;CEP128;RPS6KA4;ZFYVE28;AI593442;BMPER;AKT2;PPP4R4;CAR11;AGFG2;ANKS1B;LZTS3;PPP1R16B;KCNH3;IGFBP4;DDX11;FST;CDYL;UPB1;KRT9;TRAIP;CACNB2;TPST1;RBP4;NHP2;TRIB3;CCNO;JCAD;NECAB2;ZBTB8A;GPR83;ACAT2;FOXO1;RHOBTB2;SEC14L1;HRH3;ZMAT4;PENK;INPP5J;OTOF;CLSPN;DRD1;DRD2;NTSR2;ZBTB18;PLK5;FAM78A;ARHGEF39;DDIT4L;NR1D1;SYT9;NR2F6;ARHGAP33;GNAO1;TMEM114;PPP1R1B;PLXNB1;GSTM6;RAD9A;HRK…
Expression In Cerebrum Of 22 Wk R6/1 HD Mice GSE3621	256/822	5.46e-39	1.04e-37	0	0	2.99667	264.016	CPNE9;OXTR;CPNE7;WIPF3;HTR4;ADARB2;RASSF3;AI593442;DPF1;IER5;ACTN2;PRKCB;STARD8;ACTN1;SLC6A15;CIRBP;SOX11;SLC6A11;TIAM2;GAREM1;ADCY9;ADGRB2;DAAM1;ADGRB1;XRN2;ACOT2;ACOT1;RIN1;CCDC82;NGEF;SKAP2;KCTD16;NECAB2;NECAB3;CTBP2;SLC35D3;LYPD1;IQGAP2;HIF1A;SEC14L1;PENK;LDHD;KCNN1;GSG1L;OTOF;1500009C09RIK;NTSR2;ABCA1;EGR1;PLK5;EGR4;ARPP21;H3F3B;BCL11B;PLK2;RANBP17;PDE2A;DDIT4L;PARVA;DCLK1;NET1;PKIB;MYO5B;PP…
Genes Up-Regulated In Cerebellum Of WT Mice Compared To Atxn1[82Q] KI Mice GSE114815	471/1942	1.17e-38	2.2e-37	0	0	2.19372	191.609	CYFIP2;TLNRD1;DCAF5;ALKBH6;NDST1;PCMT1;SAMD14;CNST;LSM11;AKT2;PPP4R4;RAVER2;HOMER3;ANKS1B;RBFOX2;WSB2;HPCAL1;CACNA2D2;GTPBP3;ORAI3;ORAI2;FAR2;ASTN2;ACOT5;PLBD2;CTBP1;AGAP3;MRPL12;FAM124A;RDH11;FLRT3;PRKAR2B;LDHD;SYNDIG1;PIP5K1B;AMZ1;ZBTB7A;RREB1;ST3GAL2;LHPP;VTI1B;B3GALNT2;ACD;PLK5;NCAPH2;THAP12;NR2F6;PKIB;SQLE;SLC6A6;CPEB1;PPP5C;GPR180;PRRT4;PIGS;GPR26;KCNC3;PHF1;ABCC12;C77080;TRIM9;UBL3;ZFP385C…
Down-regulated Genes In Hippocampus Of 6 Mon HD Q175 Mice Vs Q20 GSE73503	554/2417	2.34e-38	4.37e-37	0	0	2.06107	178.59	CYFIP2;POP5;TLNRD1;TMEM200A;WIPF3;SCX;EMC10;STMN4;ALKBH6;ZFYVE28;LSM11;ZFYVE27;HOMER3;IER5;ANKS1B;MED1;UNC13A;WSB2;PRKCB;STARD8;FIBCD1;GTPBP3;RBP4;ADCY9;ORAI3;MAP1A;ORAI2;ASPHD2;ATF6;ATF3;PLBD2;NGEF;ATF4;NAA60;PDGFB;AGAP3;IQGAP2;MRPL12;ABR;RHOT2;FAM124A;EPB41L1;1110051M20RIK;LDHD;SYNDIG1;PIP5K1A;GSG1L;ZBTB7A;ST3GAL2;VTI1B;JAG2;PLK3;CREBBP;ACD;PLK5;ARPP21;PLK2;NR1D1;GPR137C;SQLE;PPP5C;PLCH2;ACHE;L…
Genes Down-Regulated In Striatal Cholinergic Interneurons Of zQ175DN Vs HdhQ20 PMID32681824	203/586	2.69e-38	5e-37	0	0	3.47695	300.781	WIPF3;SLC4A4;RPS16;AKT2;RAVER2;PWWP2A;ACTN2;LIMCH1;YOD1;KRT9;BCR;TIAM2;EML5;GAREM1;HECW2;AKAP9;SPATA13;SIK3;TRIB3;RIN1;ATF6;NGEF;CCNO;STC1;FAM124A;SEC14L1;ZFP180;D5ERTD579E;PENK;CHST15;TNRC18;RREB1;EGR1;PLK5;ARPP21;BCL11B;EGR4;FAM78A;PLK2;THAP12;DDIT4L;NETO2;CYLD;UCK2;CCDC88C;PPP1R1B;EZH2;HRK;RYR1;LRRC10B;TCF20;RYR3;NHSL2;CAMKV;TMEM44;ENC1;JARID2;DLGAP2;ELOVL2;TESC;TCF12;BAZ1A;DUSP7;ANO3;MTF2;PXD…
Down-regulated Genes In Hippocampus Of Foxp1 KO Vs WT Mice GSE62718	303/1058	2.82e-38	5.19e-37	0	0	2.67886	231.619	CYFIP2;POP5;FAAH;WIPF3;ICAM5;HTR4;ZFYVE28;SYNPR;LSM11;AKT3;LIPG;RAVER2;HOMER3;EPHB2;SCN1B;AGFG2;MEF2A;UNC13B;EPHA4;ATP6V1G2;EPHA6;WSB2;ARL15;FBXO2;SLC6A15;FIBCD1;ISLR2;ACSL5;ACSL4;MFSD12;MTURN;TIAM2;SFRP4;GAREM1;ADCY9;ADGRB2;CRISPLD1;ORAI3;ORAI2;KCNQ3;ACOT2;ASPHD2;ATF6;ACOT5;ACOT4;KCTD16;ACOT3;ABCB4;MGST3;AGAP3;IQGAP2;ACTR3B;PPL;SEC14L2;FLRT3;SYNDIG1;INPP5J;PIP5K1A;TSPAN5;ST3GAL2;EXPH5;LHPP;TRPM4…
Expression In 13 Wk TIF-IA KO HD Mice GSE29647	935/4751	4.18e-38	7.65e-37	0	0	1.79001	154.061	UXS1;SPINT2;AKT3;DPYSL3;PKNOX1;ZFP286;MEF2A;STARD4;RBFOX2;STARD8;CACNA2D2;MRTFA;PHKA1;SCAMP1;FRS3;UPB1;BCR;EML5;RBP1;ATF6;ATF3;NGEF;SKAP2;ATF4;SLBP;ZBTB8A;CHIA1;ABCB4;FLII;PDGFB;LYPD1;AGAP3;TAPBPL;IQGAP2;RHOT2;HLCS;EPB41L1;EPB41L2;1110051M20RIK;PIP5K1A;PIP5K1B;ZBTB7A;VTI1B;ABCA1;CREBBP;GPR12;CADM1;MTERF2;NCAPH2;EDEM1;PBX2;L1CAM;GRIN2B;DAZL;PKIB;FXYD2;SFXN3;SFXN4;HRK;MED16;LRRC1;SMPD3;TMEM47;NHSL2…
Down-regulated Genes In Cortex Of 6 Mon HD Q175 Mice Vs Q20 PMID26900923	278/937	4.45e-38	8.07e-37	0	0	2.80388	241.148	CPNE9;SLC23A3;LPGAT1;UXS1;PITPNA;ADARB1;HTR4;SLC4A4;ZFYVE28;SYNPR;RASSF3;AI593442;MSANTD1;PPP4R4;HABP4;PTGFRN;SCN1B;AGFG2;ACVR1;DYNC2H1;STARD4;PRKCB;STARD8;SLC6A11;SCAMP1;TMEM170B;SYTL5;UPB1;HECW2;RRAGD;MXRA7;ANKK1;ASTN2;ATF6;1700016K19RIK;NGEF;KCTD15;KCTD16;NECAB2;NECAB3;ZBTB1;6430548M08RIK;TMTC1;ABR;SEC14L1;PENK;TSPAN5;GSG1L;OTOF;PIP5K1B;CDK17;EGR1;PLK5;ARPP21;GADD45B;LRBA;PLK2;DDIT4L;PARVA;NET…
Differentially Expressed Genes In Hippocampus Of HD Q175 Mice PMID26900923	319/1141	4.68e-38	8.44e-37	0	0	2.59673	223.199	CPNE9;CYFIP2;SPON1;FAAH;TMEM200A;CPNE7;WIPF3;SPINT2;HTR4;SLC4A4;RPS6KA4;SAMD14;LSM11;PPP4R4;RAVER2;NIPAL3;HABP4;HOMER3;IER5;SCN1B;AGFG2;ANKS1B;ACVR1;ARL10;UNC13B;EPHA4;ATP6V1G2;EPHA6;UNC13A;ARL15;PRKCB;SLC6A15;HPCAL1;KRT9;CARHSP1;ADCY9;ADGRB2;ORAI3;ADGRB1;ORAI2;ACOT1;RIN1;ATF6;PLBD2;KCTD15;SKAP2;NECAB3;EPHA10;CTBP2;CHIA1;PCDH10;FLII;LYPD1;PCDH15;TGFA;STC1;TMTC1;IQGAP2;SEC14L2;ABR;SEC14L1;RACGAP1;…
Genes Up-Regulated In HD iPSCs After 100 D Of Differentiation GSE109534	825/4056	4.83e-38	8.63e-37	0	0	1.83671	157.817	PID1;NEXMIF;SAMD14;ZFYVE27;LSM11;DPYSL4;AKT3;LIPG;SAMD10;MEF2A;HES6;RBFOX2;HPCAL1;FRS3;RFX4;ORAI2;RABL2;NGEF;MTMR3;MEAF6;TARSL2;LYPD1;AGAP3;NYAP2;SLC30A10;ADAMTS10;DEDD2;PRKAR2B;D5ERTD579E;1110051M20RIK;CFAP69;CFAP65;AMZ1;ZBTB7C;MYH7B;GPR12;CADM1;TIPARP;MTERF2;NR2F1;NETO2;L1CAM;GRIN2B;FXYD2;SFXN3;NAPEPLD;DCHS1;PRRT4;DMRTC1A;ACHE;GPR26;LRRC10B;SHB;SHD;LETM2;SMPD3;TUBA1B;HEY1;SMPD1;2610301B20RIK;JA…
Differentially Expressed Genes In Hippocampus Of 10 Mon HD Q175 Mice Vs Q20 GSE73503	371/1421	3.12e-37	5.54e-36	0	0	2.38191	200.219	CPNE9;POP5;FAAH;SPARC;WDSUB1;PNMAL1;TMEM200A;CPNE7;WIPF3;SPINT2;HTR4;SLC4A4;ZDBF2;LSM11;PPP4R4;DPYSL3;RAVER2;STMN1;NIPAL3;HABP4;TRIM26;HOMER3;SCN1B;ANKS1B;ACVR1;EPHA4;ATP6V1G2;EPHA6;WSB2;PRKCB;SLC6A15;RSAD1;CIRBP;SOX11;MTURN;KRT9;GPR165;CARHSP1;GAREM1;ADCY9;ORAI3;ORAI2;MXRA7;RIN1;ATF6;ACOT5;RNF122;EPHA10;IGSF3;PCDH10;ZFP503;PCDH15;TGFA;STC1;TMTC1;IQGAP2;PPL;GMCL1;SEC14L2;ABR;HSPH1;RACGAP1;HLCS;FL…
Expression In Ctip2 Null Vs WT Mouse Striatum GSE9330	399/1582	1.89e-36	3.33e-35	0	0	2.2816	187.677	PATJ;SERPINE2;PNMAL1;NEXMIF;STMN4;SPINT2;ADARB2;GPATCH8;ZDBF2;ZFYVE28;DPYSL3;PKNOX1;SAMD10;RNF138RT1;MBNL2;9330159F19RIK;HPCAL1;CACNA2D2;B630019K06RIK;SOX11;WDR73;RC3H2;RBP1;ACOT2;RABL2;NGEF;SLBP;CTBP2;ENDOD1;NEDD4L;HSPH1;PCDHA1;PRKAR2B;AMZ1;S100A10;ABCA1;ARPP21;CADM1;NEBL;TIPARP;GTF2IRD2;PLK2;CPEB2;CDKN1A;MOCS3;GPR26;SPEF1;SHB;SHD;TRIM9;NHSL2;TUBA1B;MED13;TRIM3;NEFL;NEFM;NELFB;JAK2;GPRASP2;KCND3…
Differentially Expressed Genes In Cerebellum Of 10 Mon HD Q175 Mice Vs Q20 GSE73468	773/3776	3.56e-36	6.23e-35	0	0	1.83278	149.598	NEXMIF;ALKBH6;SAMD14;PPP4R4;RAVER2;HES6;STARD7;HPCAL1;CACNA2D2;SCAMP1;RC3H2;EML4;RFX4;ORAI3;RBP1;FAR1;FAR2;PLBD2;NGEF;ATF4;SLBP;SAR1A;PDGFB;TAPBPL;IQGAP2;NYAP2;ADAMTS10;EPB41L1;1110051M20RIK;SYNDIG1;PIP5K1A;CFAP65;AMZ1;ZBTB7C;ABCA1;NEBL;NR2F1;PBX2;EIF2AK4;L1CAM;GRIN2B;PKIB;SFXN4;GSTM6;PIGS;LIN54;LAD1;GPR26;KCNC3;SNX11;SHB;MMP23;JPH4;TMEM47;NEFM;NEFH;STUM;ELOVL2;SLC39A11;FAHD2A;PHF20L1;BDH1;KCNMA1…
Genes Changed In Chat-expressing Interneurons Of R6/2 Vs WT PMID32681824	314/1141	5.31e-36	9.23e-35	0	0	2.53464	205.872	POP5;FAAH;PID1;SERPINE2;TMEM200A;UXS1;PITPNA;RAPH1;ADARB2;PTPDC1;GPATCH8;HS6ST3;ZFYVE28;GLE1;PPP4R4;AKT3;NDST3;DAG1;LGALS8;BTRC;ANKS1B;MEF2A;UNC13B;MCCC2;EPHA4;EPHA6;LIMCH1;PRKCB;ACTN1;SLC6A15;CACNA2D2;EBF4;VWA5B2;ADCY9;MAP1A;KCNQ3;SIK3;ASTN2;KCTD16;SPTBN4;PCDH15;NEDD4L;TMTC1;NYAP2;ADAMTS10;NKAIN2;ABR;FAM171A1;PENK;SYNDIG1;TSPAN5;GSG1L;CREBBP;CADM1;CRADD;ARPP21;ZFP638;NEBL;IQSEC3;ERLIN1;POU6F2;SM…
Genes Up-Regulated In CAG Length-Dependent Genes In 6 Mon Mouse Striatum PMID26900923	749/3632	5.58e-36	9.62e-35	0	0	1.84326	149.626	TRIR;PID1;PNMAL1;NEXMIF;A430005L14RIK;RAPH1;1700001L19RIK;SPINT2;DCAF5;PTPDC1;GLDN;RXFP3;GLE1;GCSH;PCMT1;COMTD1;SAMD14;LSM11;DPYSL4;DPYSL3;NDST3;WDR91;LIPG;STMN1;SAMD10;UNC13B;HES6;STARD7;B630019K06RIK;SOX11;WDR73;GPR162;GPR165;DAAM1;ARMC6;ACOT2;ACOT1;FAR2;RABL2;VPS28;RNF122;ACOT4;SKAP2;SLBP;CTBP1;ABCB4;FLII;TAPBPL;NYAP2;SLC30A10;ANAPC11;FLRT2;TERT;RDH11;ADAMTS19;1110051M20RIK;CFAP69;PIP5K1B;CFAP…
Genes Up-Regulated In Control iPSCs After 130 D Of Differentiation GSE109534	699/3327	6.57e-36	1.13e-34	0	0	1.87432	151.839	CYFIP2;PID1;NEXMIF;1700001L19RIK;STMN4;ADARB1;ADARB2;DCAF5;SLC4A4;SAMD14;ZFYVE27;LSM11;DPYSL4;MSANTD1;AI593442;ZXDB;AKT3;LIPG;IER5;SAMD10;ANKS1B;MBNL2;RBFOX2;9330159F19RIK;WSB2;NHLRC3;HPCAL1;SOX11;WDR73;FRS3;UPB1;GPR162;DAAM1;DAAM2;MAP1A;RABL2;ANKK1;VPS28;NGEF;MTMR3;MEAF6;LYPD1;ENDOD1;NEDD4L;AGAP3;NYAP2;SLC30A10;C9ORF72;ADAMTS10;ABR;PCDHA1;EPB41L1;D5ERTD579E;1110051M20RIK;AMZ1;VPS16;ZBTB7C;JAG2;C…
Differentially Expressed Genes In Cortex Of 6 Mon HD Q175 Mice Vs Q20 PMID26900923	433/1782	1.52e-35	2.58e-34	0	0	2.18013	174.79	TRIR;UXS1;WDR83;ADARB1;HTR4;SLC4A4;PTPDC1;ZFYVE28;SAMD14;DPYSL4;AI593442;MSANTD1;PPP4R4;DPYSL3;NDST3;STARD4;IAH1;PRKCB;STARD8;SCAMP1;SYTL5;UPB1;HECW2;ACOT1;ASTN2;ANKK1;ATF6;NGEF;SKAP2;CTBP1;FLII;ABR;FAM124A;S100A13;GSG1L;PIP5K1B;CDK17;PLK5;ARPP21;PLK2;LRBA;NETO2;L1CAM;GPR137C;HNRNPM;SQLE;UCK2;GALNTL6;SETD2;LRRC10B;KCNC3;PHF1;BHLHE41;SNX11;MED16;LETM2;MMP23;TMEM47;PANX2;HEY1;GPR137;NEFM;RSPO1;NEFH…
Genes Down-Regulated In Expression In Striatum Of R6/2 HD Mice GSE62210	99/193	2.24e-35	3.8e-34	0	0	6.75391	538.84	CPNE9;CPNE7;GM19410;MSMO1;HTR4;SLC8A2;RGS4;AI593442;PPP4R4;PPP1R16B;KCNH3;KCNH4;IGFBP4;KRT9;RBP4;SLC9A5;RIN1;JCAD;CHRNA4;INSIG1;TMEM121B;ITPR1;STC1;GPR83;IQGAP2;RASGRP2;RHOBTB2;SEC14L1;HRH3;ZMAT4;PENK;INPP5J;GSG1L;DRD1;EGR1;PLK5;SYT2;RASL10A;HTR1D;DDIT4L;NETO2;ARHGAP33;EFNA3;SYNDIG1L;PPP1R1B;RYR1;GPR26;KCNK9;LRRC10B;RASGRF2;GRM1;PRADC1;PMEPA1;HRAS;ARG2;LYNX1;TRPC6;HMGCS1;TRPC3;DUSP1;GPX6;TBC1D8;A…
Genes Up-Regulated In Foxp2/Olfm3-expressing Neurons Of HD Patients Vs Control PMID32681824	425/1746	4.85e-35	8.14e-34	0	0	2.18159	172.373	CYFIP2;PID1;NEXMIF;RAPH1;ADARB2;PSMD5;AKT3;DPYSL3;PKNOX1;RBFOX2;PRKCB;HPCAL1;DAAM1;ASTN2;PLBD2;SKAP2;MTMR3;CTBP2;IQGAP2;SLC30A10;ADAMTS10;ABR;ADAMTS19;PIP5K1A;PIP5K1B;ZBTB7C;ABCA1;GPR12;NEBL;GTF2IRD2;NR2F1;POU6F2;NETO2;TMEM196;GPR137C;CYLD;SLC6A6;PPP5C;GIPC2;FAT1;GSDME;ARHGAP1;TCF20;LRRC1;MED13;ENSA;TIMP2;JAK2;XXYLT1;ARG2;KCND3;ELOVL2;DENND2A;TCF12;SLC39A11;ITPKB;NCOR1;ZEB1;PXDN;CDC42EP3;KCNMA1;H…
Genes Changed In Human HD Neurons Vs Control Neurons PMID32070434	556/2495	7.54e-35	1.26e-33	0	0	1.97939	155.522	PATJ;PID1;SERPINE2;RPL31;WIPF3;DCAF8;ELK1;GPATCH8;GCSH;SAMD14;CNST;PWWP2A;IER5;SAMD10;ZFP286;MBNL2;RBFOX2;NHLRC3;PRKCB;STARD7;COL23A1;HPCAL1;CACNA2D2;SOX11;FRS3;EML4;DAAM1;ACOT2;ACOT1;ACOT5;ATF4;SF1;SKAP2;ACOT3;SLBP;ANAPC16;CTBP1;WDR61;AGAP3;HIF1A;FAM149A;DEDD2;FAM171A1;RHOT2;HSPH1;FLRT2;FLRT3;PRKAR2B;CHST15;ZBTB7A;PLK3;CREBBP;PLK5;ARPP21;EDEM1;NR1D1;L1CAM;PHC3;GRIN2B;NR2F6;PKIB;RNF103;GPR180;FND…
Genes Changed In Pvalb/Th-expressing Interneurons Of HD Patients Vs Control PMID32681824	523/2304	8.25e-35	1.37e-33	0	0	2.01797	158.37	PID1;RPL31;NEXMIF;WIPF3;RAPH1;DCAF5;SLC4A4;GPATCH8;AKT2;NDST3;RAVER2;PWWP2A;MEF2A;UNC13B;STARD4;MBNL2;RBFOX2;NHLRC3;CACNA2D2;EML5;MAP1A;FAR1;MAML3;AGAP3;SLC30A10;FAM171A1;ABR;RHOT2;HSPH1;RIC8B;FLRT2;HLCS;EPB41L2;ZBTB7C;SLC19A2;ABCA1;B3GALNT2;CDK17;NDFIP1;ARPP21;CADM1;POU6F2;GRIN2B;TMEM196;GPR137C;HNRNPM;SQLE;CYLD;UCK2;GIPC2;SFXN4;GALNTL6;PAM;SETD2;CLTA;LYST;LRRC1;JPH4;TRIM9;TUBA1B;TMSB4X;TIMP2;JA…
Down-regulated Genes In Cortex Of 10 Mon HD Q175 Mice Vs Q20 PMID26900923	293/1051	1.18e-34	1.94e-33	0	0	2.56931	200.73	CPNE9;SLC23A3;POP5;SERPINE2;WIPF3;HDAC11;STMN4;ADARB1;SLC4A4;ZFYVE28;SYNPR;MSANTD1;AKT2;PPP4R4;RPS6KA2;LIPG;HABP4;CPNE2;SCN1B;PAQR7;PRKCB;STARD8;KRT2;HPCAL1;SLC6A11;CMBL;THAP1;PLPP6;RBP4;RBP1;ADGRB1;RRAGD;MXRA7;RIN1;ATF6;1700016K19RIK;NGEF;KCTD15;NECAB2;NECAB3;EPHA10;CHIA1;6430548M08RIK;CRHR1;SEC14L2;ABR;SEC14L1;PENK;LDHD;CFAP69;TSPAN5;GSG1L;OTOF;PIP5K1B;RREB1;ZBTB7C;NTSR2;PLK5;ARPP21;DDIT4L;PARV…
CAG Length-Dependent Genes In 6 Mon Mouse Cortex PMID26900923	415/1698	1.34e-34	2.19e-33	0	0	2.18926	170.759	RPL31;UXS1;WDR83;ADARB1;HTR4;SLC4A4;PTPDC1;ZFYVE28;SAMD14;CNST;DPYSL4;AI593442;MSANTD1;PPP4R4;NDST3;STARD4;IAH1;PRKCB;STARD8;SCAMP1;SYTL5;UPB1;HECW2;ACOT2;ACOT1;ASTN2;ANKK1;ATF6;ATF3;NGEF;ATF4;SKAP2;FLII;ADAMTS10;ABR;FAM124A;S100A13;GSG1L;CDK17;PLK5;ARPP21;TIPARP;PLK2;ERLIN1;NETO2;L1CAM;GPR137C;HNRNPM;SQLE;UCK2;GALNTL6;LAD1;CDKN1A;LRRC10B;KCNC3;PHF1;BHLHE41;SNX11;MED16;LETM2;MMP23;PANX2;HEY1;TCTN…
Genes Up-Regulated In Endothelial Cells Of HD Patients Vs Control PMID32681824	420/1728	1.89e-34	3.07e-33	0	0	2.1745	168.853	PATJ;WIPF2;DCAF5;ZFYVE28;CNST;AKT2;AKT3;RNF138RT1;STARD4;MBNL2;RBFOX2;STARD7;BCR;EML4;ADCY9;DAAM2;ATF6;ATF3;SLBP;MTMR3;ANAPC16;CTBP2;NEDD4L;AGAP3;SLC30A10;HIF1A;DEDD2;ABR;FAM124A;HSPH1;D5ERTD579E;CHST15;PIP5K1B;ZBTB7A;RREB1;ST3GAL2;ABCA1;CREBBP;NEBL;LRBA;CDC7;ELL2;PHC3;CYLD;GIPC2;CDK13;PAM;CPEB2;PHF2;CDKN1A;SETD2;LYST;LRRC1;TMEM47;C77080;MED13;UBL3;ENSA;TNKS1BP1;KCND3;IFNGR2;DENND2A;TCF12;SLC39A1…
Genes Changed In Ciliated Ependymal Cells Of HD Patients Vs Control PMID32681824	613/2840	1.91e-34	3.08e-33	0	0	1.91354	148.569	WIPF2;NEXMIF;RAPH1;1700001L19RIK;ADARB1;DCAF5;SLC4A4;PTPDC1;GPATCH8;NDST1;AKT2;RAVER2;AKT3;DPYSL3;PKNOX1;ANKS1B;HES6;MBNL2;RBFOX2;HPCAL1;BCR;EML5;ADCY9;DAAM1;HECW2;RFX4;ORAI2;FAR1;RABL2;MAML3;ASTN2;ANKK1;SF1;ANAPC16;CTBP2;CTBP1;FLII;PRDM15;NEDD4L;WDR61;AGAP3;IQGAP2;SLC30A10;C9ORF72;FAM149A;ABR;FAM124A;HSPH1;RIC8B;FLRT2;D5ERTD579E;CFAP69;CHST15;PIP5K1B;ZBTB7A;RREB1;ST3GAL2;LHPP;ZBTB7C;S100A10;SLC1…
Genes Up-Regulated In HD iPSCs After 60 D Of Differentiation GSE109534	697/3354	3.59e-34	5.76e-33	0	0	1.84311	141.939	CYFIP2;PID1;PNMAL1;NEXMIF;1700001L19RIK;STMN4;DCAF5;SLC4A4;DCAF4;GLE1;SAMD14;ZFYVE27;LSM11;DPYSL4;MSANTD1;AI593442;ZXDB;AKT3;WDR91;LIPG;IER5;SAMD10;ANKS1B;HES6;MBNL2;RBFOX2;9330159F19RIK;WSB2;HPCAL1;SOX11;WDR73;FRS3;RC3H2;GPR162;DAAM1;RFX4;MAP1A;SPIN2C;RABL2;VPS28;NGEF;MTMR3;MEAF6;LYPD1;NYAP2;SLC30A10;C9ORF72;ADAMTS10;FLRT2;EPB41L1;FLRT3;PRKAR2B;ZFP180;D5ERTD579E;1110051M20RIK;GSG1L;ZBTB7C;CDK17;…
Genes Down-Regulated In CAG Length-Dependent Genes In 10 Mon Mouse Cortex PMID26900923	272/953	4.88e-34	7.79e-33	0	0	2.64485	202.865	CPNE9;SLC23A3;POP5;PID1;SERPINE2;WIPF3;ADARB1;SLC4A4;SYNPR;MSANTD1;AKT2;PPP4R4;RPS6KA2;LIPG;HABP4;CPNE2;SCN1B;PAQR7;WSB2;PRKCB;STARD8;CMC2;HPCAL1;SLC6A11;CMBL;THAP1;PLPP6;RBP4;RBP1;RRAGD;MXRA7;RIN1;1700016K19RIK;NGEF;KCTD15;NECAB2;NECAB3;EPHA10;CHIA1;ZBTB1;6430548M08RIK;SEC14L2;ABR;SEC14L1;PENK;LDHD;CFAP69;SARAF;TSPAN5;GSG1L;OTOF;PIP5K1B;SFN;RREB1;ZBTB7C;NTSR2;PLK5;ARPP21;DDIT4L;DCLK1;GLUD1;PPP1R…
Genes Up-Regulated In Brain And Spinal Cord Derived OPCs From P7 Vs E13.5 Mice PMID30078729	590/2714	6.34e-34	1e-32	0	0	1.92381	147.057	CYFIP2;POP5;SERPINE2;PNMAL1;NEXMIF;EMC10;STMN4;HTR4;ZFYVE28;AI593442;PPP4R4;MPV17;ANKS1B;RNF138RT1;STARD4;PRKCB;STARD7;B630019K06RIK;SCAMP1;SYTL5;GPR162;GPR165;MAP1A;ACOT2;ACOT1;ASPHD2;FAR2;ASTN2;NGEF;RNF122;TARSL2;ABCB4;LYPD1;PDGFB;ENDOD1;TAPBPL;HIF1A;FAM149A;FAM124A;EPB41L1;RDH11;PRKAR2B;EPB41L2;LDHD;RRS1;S100A13;GSG1L;AMZ1;MYH7B;NDFIP1;CADM1;NEBL;NR1D1;ELL2;TMEM196;PKIB;SQLE;CYLD;GLUD1;CPEB1;A…
Tan Module Eigengene Expression Profile Across Striatal Astrocytes Of R6/2 And Q175 Mice PMID31619545	152/401	6.91e-34	1.09e-32	0	0	3.95773	302.194	CYFIP2;CEP126;ZFP566;CHRM1;WIPF3;PPP2R2A;FNBP1L;CARF;CDH8;HS6ST3;TMEM266;DACH1;CNTNAP5B;AKT3;TBC1D30;HABP4;SLC12A6;MBNL2;TPM1;CACNA2D2;UBALD1;KCTD1;LMTK2;KRT77;LMO7;SYTL5;FNDC9;FOXP1;CACNB2;TIAM1;OLFM2;GAREM1;ADGRB2;COL4A2;MAK;AKAP9;ADAM12;TLN2;ATF6;DGKI;KCTD16;OLFR1393;D930048N14RIK;BRSK2;ISYNA1;CTTNBP2;TCF7;PLD5;NEDD4L;STC1;TMTC1;AK5;IQGAP2;CACNA1E;ARHGAP20;RIC8B;ATXN1;BRINP1;EPB41L1;SNTG1;D5ER…
Differentially Expressed Genes In Cortex Of 10 Mon HD Q175 Mice Vs Q20 PMID26900923	435/1824	1.09e-33	1.71e-32	0	0	2.12358	161.171	POP5;SERPINE2;WIPF3;STMN4;ADARB1;SLC4A4;PTPDC1;ZFYVE28;SAMD14;MSANTD1;AKT2;PPP4R4;DPYSL3;LIPG;IAH1;PRKCB;STARD8;HPCAL1;RC3H2;RBP4;RBP1;ATF6;NGEF;SKAP2;CHIA1;FLII;FAM149A;ABR;FAM124A;C7;LDHD;CFAP69;GSG1L;PIP5K1B;RREB1;ZBTB7C;PLK5;ARPP21;EDEM1;L1CAM;TMEM196;GSTM6;HRK;PHF2;LAD1;KCNC3;PHF1;SNX11;LETM2;SMPD3;JPH4;TMEM47;HEY1;TCTN2;NEFM;GPRASP2;METRN;TESC;TCF12;SLC39A10;BAZ1A;FAHD2A;DUSP7;SLC7A4;ITPKB;…
Down-regulated Genes In Hippocampus Of HD Q175 Mice PMID26900923	223/719	1.13e-33	1.76e-32	0	0	2.95255	223.98	CYFIP2;CPNE9;FAAH;TMEM200A;CPNE7;WIPF3;HTR4;SLC4A4;LSM11;PPP4R4;RAVER2;HABP4;HOMER3;IER5;AGFG2;SCN1B;ANKS1B;UNC13B;ACVR1;EPHA4;UNC13A;ATP6V1G2;EPHA6;PRKCB;ARL15;KRT9;ADCY9;ADGRB2;ORAI3;ADGRB1;ORAI2;RIN1;ATF6;PLBD2;KCTD15;NECAB3;EPHA10;IQGAP2;SEC14L2;ABR;SEC14L1;GSG1L;OTOF;TSPAN5;KCNN2;SCN3B;NTSR2;B3GALNT2;RABGAP1L;PLK5;ARPP21;GADD45B;PLK2;IQSEC3;PDE2A;NR1D1;DCLK1;GPR137C;NET1;SQLE;PPP1R1B;CALM3;G…
Up-regulated Genes In Cerebellum Of 6 Mon HD Q140 Mice Vs Q20 GSE78270	370/1468	1.25e-33	1.93e-32	0	0	2.26396	171.522	CYFIP2;SPON1;LPGAT1;RAPH1;ADARB1;DCAF5;HS6ST2;IKZF5;NDST1;RPS6KA3;SYNPR;GOLGA4;LSM11;SCN11A;PPP4R4;ZXDB;AKT3;RAVER2;NIPAL3;DAG1;KIF21B;EPHB2;SLC12A6;ANKS1B;MEF2A;DYNC2H1;EPHA4;STARD4;PRKCI;RBFOX2;MBNL2;LIMCH1;PRKCB;COG5;SLC6A15;CACNA2D2;ACSL4;YOD1;TMEM170B;TIAM2;SFRP4;TIAM1;GAREM1;DAAM1;MAP1A;RRAGD;KCTD12;MAML3;TLN2;ASTN2;ATF6;CCDC82;ADCYAP1R1;MTMR3;TARSL2;PCDH10;TMEM63C;PCDH15;NEDD4L;TMTC1;NYAP2…
Genes Up-Regulated In Medulla Of 28 Week Old WT Mice Vs Atxn 1 154Q/2Q Mice Both Treated With Vehicle GSE114674	538/2414	1.27e-33	1.96e-32	0	0	1.97176	149.346	PNMT;POP5;PID1;TLNRD1;PNMAL1;A430005L14RIK;SCX;1700001L19RIK;EMC10;STMN4;ADARB1;SLC4A4;RXFP3;GCSH;GLE1;LSM11;AI593442;STMN1;PKNOX1;WSB2;PRKCB;HPCAL1;PHKA1;DKK2;GPR162;ARMC6;DAAM2;ACOT5;UBA52;NGEF;ATF4;PIF1;CTBP1;LYPD1;AGAP3;MRPL12;SLC30A10;ABR;EPB41L1;LDHD;SYNDIG1;CHST15;GSG1L;SFN;ST3GAL2;VTI1B;ZBTB7C;S100A10;ARPP21;NEBL;NCAPH2;PBX2;NR1D1;NETO2;NR2F6;SQLE;GLUD1;ARL2BP;GPR180;NAPEPLD;GSTM6;GSDME;F…
Genes Down-Regulated In Expression In Cerebrum Of 18 Wk R6/1 HD Mice GSE3621	132/324	2.67e-33	4.08e-32	0	0	4.4384	332.891	CPNE9;RAB3C;PLXND1;DGKB;CPNE7;WIPF3;NPY2R;CXCL14;LAMP5;RGS4;AI593442;DPF1;CAR11;IER5;LZTS3;KCNH3;TLE2;SPINK8;ACTN2;PRKCB;IGFBP4;STARD8;KCTD1;SLC6A11;KCTD4;LEMD1;PLPP6;PCP4;ADGRB2;DAAM1;PKP2;RIN1;NPTXR;NGEF;KCTD16;NECAB2;NECAB3;TMEM121B;HPCA;LYPD1;NEDD4L;GPR83;AK5;IQGAP2;RASGRP2;RHOBTB2;KCNV1;SEC14L1;HRH3;ZMAT4;PENK;GSG1L;OTOF;TSPAN5;DRD1;DRD2;PLK5;ARPP21;BCL11B;RASL10A;DDIT4L;DCLK1;ARHGAP32;SYNDI…
Down-regulated Proteins In Striatum Of 10 Mon HD Q175 Mice Vs Q20 PXD006302	124/294	4.16e-33	6.31e-32	0	0	4.70081	350.491	CYFIP2;SPON1;TLNRD1;UBXN2B;DGKB;WIPF3;RPS6KA4;PPP4R4;AKT3;SLC12A6;AGFG2;TBC1D10A;ANKS1B;LZTS3;PPP1R16B;MLIP;UNC13A;SLC30A3;ACTN2;PRKCB;ACTN1;HPCAL1;YOD1;LMO7;FOXP1;BCR;TIAM2;CACNB2;OLFM2;PCP4;ADCY9;HECW2;RRAGD;SPATA13;RIN1;NPTXR;NGEF;DGKI;JCAD;KCTD16;NECAB2;HPCA;ITPR1;IQGAP2;RASGRP2;FOXO1;RAP1GAP;SEC14L3;ARHGAP20;SEC14L1;PENK;INPP5J;DRD1;GRIA3;BBS2;CDK17;OSBPL8;ARPP21;PDE2A;NETO2;CYLD;DLG2;PPP1R1…
Differentially Expressed Genes In HdhQ111 Vs WT Mice GSE97101	66/100	4.98e-33	7.51e-32	0	0	12.3396	917.813	CPNE9;HRK;RYR1;GASK1B;ANKRD35;LRRC10B;DUSP18;FGF3;RPS6KA4;PPP4R4;PRADC1;KCNH4;GPX6;DSG1C;KRT9;TRAIP;RBP4;OLFM3;CYP2A5;ADORA2A;TNNT2;SCN4B;VWA7;KLHL14;RGS14;CHRNA4;TMPRSS6;STC1;WNT8B;RASGRP2;LRRC55;COCH;DDN;SEC14L3;ABI3BP;PENK;INPP5J;SLITRK6;GSG1L;CLSPN;GABRD;S100A10;WNT4;ZBTB18;MYH7B;PLK5;ARPP21;LRRN3;RASL10A;PCDH20;POU6F2;DDIT4L;SLC4A11;NETO2;FBXL16;DGAT2L6;MAFA;GPR6;CCDC88B;MAS1;CD4;PDE10A;CROC…
Genes Changed In Striatal Cholinergic Interneurons Of zQ175DN Vs HdhQ20 PMID32681824	239/806	1.11e-32	1.67e-31	0	0	2.77382	204.09	CMAS;WIPF3;SLC4A4;RPS16;AKT2;RAVER2;PWWP2A;KIFAP3;MEF2A;ACTN2;LIMCH1;YOD1;KRT9;BCR;TIAM2;EML5;GAREM1;HECW2;SPATA13;AKAP9;SIK3;TRIB3;RIN1;ATF6;NGEF;CCNO;MAGED1;STC1;SEC14L1;FAM124A;INPP5F;ZFP180;D5ERTD579E;PENK;CHST15;TNRC18;RREB1;EGR1;PLK5;EGR4;ARPP21;BCL11B;FAM78A;PLK2;THAP12;DDIT4L;NETO2;DCLK1;ZWINT;CYLD;UCK2;PPP1R1B;CCDC88C;EZH2;CDS2;HRK;RYR1;LRRC10B;TCF20;RYR3;TMEM47;NHSL2;CAMKV;TMEM44;ENC1;J…
Down-regulated Proteins In The Striatum Of R6/2 Vs WT PXD008099	108/237	1.46e-32	2.17e-31	0	0	5.376	394.088	RAB3C;DGKB;WIPF3;PPP2R2A;ICAM5;SLC4A4;PPP4R4;RPS6KA2;SACS;AGFG2;ANKS1B;LZTS3;PPP1R16B;SLC30A3;ACTN2;PRKCB;ACTN1;LMO7;BCR;TIAM2;GPD1;RIN1;NPTXR;NGEF;DGKI;JCAD;OSBP2;NECAB2;HPCA;ITPR1;RASGRP2;ACTR3B;CACNA1E;RAP1GAP;STRIP2;BAG5;BRINP1;PENK;INPP5J;DRD1;GRIA3;CDK17;OSBPL8;ARPP21;BCL11B;CCDC136;PDE2A;TMEM132A;CYLD;DIAPH2;PPP1R1B;KYAT3;ACHE;MCTP1;ACY1;PPP1R9A;SIPA1L3;NRGN;SMPD3;TRIM9;CAMKV;ME2;DLGAP2;CA…
Mouse Cortex Corticospinal Neuron Markers PMID19013282	940/4935	2.15e-32	3.19e-31	0	0	1.70065	124.005	SPINT2;ZFYVE27;DPYSL4;AKT2;DPYSL3;RBFOX2;STARD8;FIBCD1;HPCAL1;MRTFA;PHKA1;BCR;ORAI3;ORAI2;FAR1;FAR2;PLBD2;MEAF6;TARSL2;CHIA1;FLII;PDGFB;AGAP3;TAPBPL;IQGAP2;MRPL12;DEDD2;RHOT2;HSPH1;HLCS;EPB41L1;RDH11;1110051M20RIK;PIP5K1A;PIP5K1B;AMZ1;JAG2;JUP;GPR12;CADM1;NCAPH2;UCK2;UCK1;ZFAT;NAPEPLD;DMRTC1A;PIGS;ACHE;KCNC3;KDM8;ARHGAP1;MED16;LETM2;SMPD3;SMPD1;NEFM;JAK2;NEFH;ARG2;ACTL6B;KCND3;SLC39A11;SLC39A10;F…
Up-regulated Genes In Striatum Of HD Q175 Mice PMID26900923	551/2526	7.38e-32	1.09e-30	0	0	1.91697	137.417	PID1;PNMAL1;NEXMIF;A430005L14RIK;SPINT2;DCAF5;PTPDC1;GCSH;PCMT1;COMTD1;SAMD14;DPYSL4;DPYSL3;NDST3;SAMD10;UNC13B;HES6;STARD7;B630019K06RIK;SOX11;GPR162;ARMC6;ACOT2;ACOT1;MAML3;VPS28;RNF122;SKAP2;ABCB4;FLII;TAPBPL;NYAP2;SLC30A10;HIF1A;TERT;RDH11;CFAP69;PIP5K1B;CFAP65;EXPH5;ZBTB7C;GM10471;CREBBP;NDFIP1;POU6F2;EIF2AK4;TMEM196;PPP5C;MEX3A;FAT1;PCDHB6;PCDHB5;PAM;DMRTC1A;FANK1;PIGS;PHF2;LAD1;RSPH3A;ZFP3…
Down-regulated Genes In Hippocampus Of 10 Mon HD Q175 Mice Vs Q20 GSE73503	246/850	8.27e-32	1.21e-30	0	0	2.68163	191.924	CPNE9;POP5;FAAH;SPARC;PNMAL1;TMEM200A;CPNE7;WIPF3;HTR4;SLC4A4;LSM11;PPP4R4;RAVER2;HABP4;HOMER3;SCN1B;ANKS1B;ACVR1;EPHA4;ATP6V1G2;EPHA6;WSB2;PRKCB;KRT9;GAREM1;ADCY9;ORAI3;ORAI2;MXRA7;RIN1;ATF6;ACOT5;EPHA10;IQGAP2;GMCL1;SEC14L2;ABR;HSPH1;FLRT3;PENK;LDHD;SYNDIG1;TSPAN5;GSG1L;OTOF;PIP5K1B;KCNN2;SCN3B;NTSR2;RABGAP1L;PLK5;NEBL;PCDH20;PLK2;IQSEC3;PBX2;NETO2;DCLK1;GPR137C;NET1;GLUD1;SQLE;MYO5B;NAPEPLD;CA…
Genes Changed In Pvalb/Th-expressing Interneurons Of R6/2 Vs WT PMID32681824	239/816	8.93e-32	1.3e-30	0	0	2.72411	194.755	LPGAT1;NEXMIF;PITPNA;ADARB2;SLC4A4;GPATCH8;HS6ST2;HS6ST3;SYNPR;MEF2A;EPHA4;LIMCH1;PRKCB;COL23A1;CACNA2D2;EML5;TIAM1;KCNQ3;SIK3;ASTN2;KCTD16;PCDH15;PRDM10;MBTD1;NKAIN2;ABR;SEC14L1;EPB41L1;FLRT3;1110051M20RIK;PENK;TSPAN5;GSG1L;KCNN2;CREBBP;RABGAP1L;CADM1;ARPP21;BCL11B;NEBL;IQSEC3;RANBP17;PHC3;DCLK1;STAG1;GALNTL6;CDK13;CPEB2;PAM;GSDME;PCSK2;PTPRS;TCF20;SIPA1L2;RYR3;C1QTNF4;EPB41L4B;MED13;CRTAC1;DLGA…
Genes Up-Regulated In Vehicle Treated Wild Type Vs STHdhQ111 GSE129143	823/4207	1.67e-31	2.42e-30	0	0	1.72852	122.493	PID1;NEXMIF;SCX;SPINT2;ZFYVE28;COMTD1;ZFYVE27;DPYSL3;NDST3;LIPG;ZFP286;HES6;STARD4;FIBCD1;HPCAL1;EML4;EML5;ASPHD2;ATF6;ATF3;NGEF;ATF4;PDGFB;IQGAP2;RHOT2;RDH11;EPB41L2;SYNDIG1;VTI1B;ZBTB7C;JAG2;CADM1;NR2F1;ERLIN1;EIF2AK4;NETO2;L1CAM;UCK2;FAT1;DCHS1;PRRT4;ACHE;LAD1;KCNC3;BHLHE41;SHB;LRRC1;PANX2;HEY1;NEFM;UPF1;METRN;SLC39A11;SLC39A10;ELOVL6;WNT9A;SLC7A4;BDH1;CDC42EP3;TMEM106C;ADSSL1;TUT1;L2HGDH;ERGI…
Down-regulated Genes In HdhQ111 Vs WT Mice GSE97101	57/80	1.79e-31	2.58e-30	0	0	15.7115	1112.31	CPNE9;HRK;RYR1;GASK1B;ANKRD35;LRRC10B;DUSP18;FGF3;RPS6KA4;PPP4R4;PRADC1;KCNH4;GPX6;KRT9;TRAIP;RBP4;CYP2A5;ADORA2A;SCN4B;VWA7;RGS14;CHRNA4;TMPRSS6;STC1;WNT8B;RASGRP2;COCH;DDN;SEC14L3;ABI3BP;PENK;INPP5J;GSG1L;CLSPN;GABRD;S100A10;WNT4;ZBTB18;MYH7B;PLK5;ARPP21;RASL10A;DDIT4L;SLC4A11;FBXL16;NETO2;DGAT2L6;GPR6;MAFA;CCDC88B;MAS1;CD4;PDE10A;CROCC;IL2RB;ACKR2;PTPN7
CAG Length-Dependent Genes In 10 Mon Mouse Cortex PMID26900923	405/1706	8.53e-31	1.22e-29	0	0	2.09568	145.098	POP5;PID1;SERPINE2;WIPF3;ADARB1;SLC4A4;PTPDC1;SAMD14;MSANTD1;AKT2;PPP4R4;DPYSL3;LIPG;IAH1;WSB2;PRKCB;STARD8;HPCAL1;RC3H2;RBP4;RBP1;NGEF;SKAP2;CHIA1;FLII;FAM149A;ABR;FAM124A;C7;LDHD;CFAP69;GSG1L;PIP5K1B;SFN;RREB1;ZBTB7C;ABCA1;PLK5;ARPP21;EDEM1;L1CAM;TMEM196;GLUD1;FAT1;GSTM6;HRK;PHF2;LAD1;KCNC3;SNX11;LETM2;JPH4;TMEM47;TRIM9;HEY1;TCTN2;NEFM;2610301B20RIK;GPRASP2;METRN;TESC;TCF12;SLC39A10;BAZ1A;FAHD2…
Expression In Striatum Of 5 Mon R6/2 HD Mice GSE26317	176/530	1.11e-30	1.58e-29	0	0	3.23308	222.993	CPNE9;PID1;TLNRD1;ANKRD35;TMEM200A;PPP2R2A;CEP128;ZFYVE28;RPS6KA4;SAMD14;AI593442;BMPER;AKT2;PPP4R4;TRIM26;CAR11;AGFG2;ANKS1B;IL13RA1;LZTS3;PPP1R16B;KCNH3;RBFOX2;IGFBP4;DDX11;FST;CDYL;VWA5B2;UPB1;TRAIP;KRT9;CACNB2;TPST1;RBP4;MAPKAPK2;NHP2;TRIB3;LY6H;CCNO;JCAD;NECAB2;ZBTB8A;ABCB4;GPR85;GPR83;ACAT2;FOXO1;RHOBTB2;STRIP1;SEC14L1;HRH3;ZMAT4;PENK;SMYD2;INPP5J;OTOF;DRD1;CLSPN;DRD2;SCN3B;NTSR2;ZBTB18;CBX…
Genes Changed In The Cortex Of zQ175 Neo- Mice Vs WT GSE123657	286/1067	1.29e-30	1.83e-29	0	0	2.42383	166.806	CPNE9;SLC23A3;ADARB1;SLC4A4;PTPDC1;GLDN;GPATCH8;NUDT4;SAMD14;AI593442;AKT2;PPP4R4;DPYSL3;LIPG;NIPAL3;HABP4;LGALS8;TNS4;ZFP286;STARD4;PRKCB;STARD8;SLC6A15;CSNK1D;SOX11;MTURN;RBP4;CARHSP1;HECW2;MXRA7;RIN1;ATF6;1700016K19RIK;NGEF;KCTD15;KCTD16;NECAB3;EPHA10;PCDH10;ZBTB1;TMTC1;ABR;STRIP2;FAM124A;PENK;SYNDIG1;SARAF;TSPAN5;GSG1L;OTOF;PIP5K1B;SCN3B;ZBED5;VTI1B;CREBBP;WNT10A;PLK5;LRRN3;ARPP21;GADD45B;TME…
Differentially Expressed Genes In Cerebellum Of HD Q175 Mice PMID26900923	506/2288	1.43e-30	2e-29	0	0	1.93651	133.076	PATJ;NEXMIF;WIPF3;SCX;STMN4;ALKBH6;GPATCH8;GCSH;AI593442;MSANTD1;SCN11A;DPYSL3;NDST3;STMN1;IER5;UNC13B;HES6;PRKCI;9330159F19RIK;HPCAL1;SCAMP1;EML4;DAAM2;HECW2;FAR1;MAML3;ATF3;PLBD2;NGEF;LRPAP1;MTMR3;CTBP2;CTBP1;NEDD4L;TAPBPL;IQGAP2;NYAP2;ADAMTS10;FAM149A;ABR;EPB41L1;HLCS;FLRT3;1110051M20RIK;LDHD;GSG1L;CREBBP;NDFIP1;PLK5;JUP;ARPP21;GTF2IRD2;NCAPH2;NR2F1;NR1D1;L1CAM;WDR54;PKIB;CPEB1;PPP5C;RNF103;AR…
Genes Down-Regulated In The Cortex Of zQ175 Neo- Mice Vs WT GSE123657	202/651	1.43e-30	2e-29	0	0	2.93855	201.929	CPNE9;SLC23A3;ADARB1;SLC4A4;GLDN;AI593442;AKT2;PPP4R4;LIPG;HABP4;TNS4;STARD4;PRKCB;STARD8;RBP4;HECW2;MXRA7;RIN1;ATF6;1700016K19RIK;NGEF;KCTD15;KCTD16;NECAB3;EPHA10;ZBTB1;TMTC1;ABR;STRIP2;PENK;SYNDIG1;GSG1L;OTOF;SARAF;TSPAN5;PIP5K1B;ZBED5;VTI1B;WNT10A;PLK5;ARPP21;GADD45B;TMEM74B;FAM78A;POU6F2;DDIT4L;DCLK1;PPP1R1B;CALM1;PCSK2;RYR1;GASK1B;CDKN1A;GPR26;TENM4;KCNC3;PCSK9;MEDAG;AKAP13;HEY1;ENC1;NEFL;NE…
HD Grade 2 Markers In Human Caudate Nucleus (HG-U133A) GSE3790	384/1597	2.44e-30	3.38e-29	0	0	2.12409	144.83	CYFIP2;SPARC;PNMAL1;GDE1;ICAM5;ADARB1;HTR4;FNBP1L;PCMT1;DPYSL4;DPYSL3;NDST3;DAG1;HOMER3;SOX9;LGALS8;KIFAP3;IER5;ATP6V1G2;MBNL2;RBFOX2;ACTN2;PRKCB;ACTN1;ADGRA3;SCAMP1;BCR;RBP4;GAREM1;ADCY9;ADGRB2;DAAM1;DAAM2;SUB1;MAP1A;FAR2;MXRA7;ATF3;SF1;NECAB2;LRPAP1;BEX2;CTBP2;NEDD4L;6430548M08RIK;ACTR3B;FAM149A;DGUOK;HSPH1;RIC8B;INPP5F;EPB41L1;PRKAR2B;PENK;CHST15;KCNN2;SCN3B;SNX7;SCN3A;RREB1;ABCA1;EGR1;RABGAP1…
Genes Down-Regulated In HD Grade 1 Markers In Human Caudate Nucleus (HG-U133A) GSE3790	91/187	2.44e-30	3.38e-29	0	0	6.05995	413.189	PCSK2;SNAP25;MCTP1;DGKB;TUSC3;TMEM45A2;LDB2;RYR3;NRGN;LAMP5;RGS4;DACH1;ADAMTS3;CAMKV;ENC1;NEFL;ME3;NEFM;PRMT8;ACTL6B;KCND2;ACTN2;PRKCB;MMD;ACTN1;TESC;LMO7;FOXP1;ANO3;BCR;CACNB2;PCP4;ARHGEF9;ADORA2A;SSX2IP;DGKI;RTN2;CAMK2B;LRPAP1;HLF;RGS14;HPCA;ITPR1;RASGRP2;ACTR3B;FAM149A;RAP1GAP;COCH;CAMKK2;DDN;SNN;HSPH1;PRKAR2B;GNG7;PPP1R7;CHST15;CAMTA1;DRD1;NCDN;DRD2;SCN3B;TAC1;WASF1;CACNG3;GABRD;CAP2;SYT5;TCA…
Genes Changed In Endothelial Cells Of HD Patients Vs Control PMID32681824	531/2441	2.83e-30	3.89e-29	0	0	1.90127	129.357	PATJ;WIPF2;UXS1;DCAF5;ZFYVE28;CNST;ZFYVE27;AKT2;AKT3;RNF138RT1;STARD4;MBNL2;RBFOX2;NHLRC3;PRKCB;STARD7;BCR;EML4;ADCY9;DAAM2;ORAI2;FAR1;ATF6;ATF3;VPS28;SF1;SLBP;LRPAP1;MTMR3;ANAPC16;CTBP2;PDGFB;NEDD4L;AGAP3;SLC30A10;HIF1A;DEDD2;ANAPC11;ABR;FAM124A;HSPH1;D5ERTD579E;CHST15;PIP5K1B;ZBTB7A;RREB1;ST3GAL2;S100A10;JAG2;ABCA1;CREBBP;NDFIP1;ARPP21;NEBL;PLK2;LRBA;CDC7;ELL2;PHC3;CYLD;SLC6A6;GIPC2;CDK13;PAM;C…
HD Markers In Human Caudate Nucleus GSE26927	933/4952	3.33e-30	4.55e-29	0	0	1.66848	113.249	POP5;NEXMIF;SPINT2;HTR4;ALKBH6;ZFYVE28;DPYSL4;PPP4R4;RAVER2;DPYSL3;NDST3;MEF2A;HES6;STARD4;RBFOX2;STARD7;HPCAL1;CACNA2D2;SCAMP1;UPB1;BCR;EML4;EML5;RBP4;RFX4;ASPHD2;ENTHD1;FAR2;ATF3;NGEF;SLBP;MTMR3;MEAF6;LYPD1;IQGAP2;EPB41L1;RDH11;ADAMTS19;D5ERTD579E;CFAP69;EXPH5;ABCA1;CREBBP;JUP;GPR12;TIPARP;NEBL;EDEM1;NR2F1;NETO2;L1CAM;UCK1;FAT1;HRK;PIGS;SRPX;GPR26;BHLHE41;LRRC1;SMPD3;JPH4;PANX2;HEY1;TMEM44;SMPD…
Expression In Cerebrum Of 18 Wk R6/1 HD Mice GSE3621	148/412	4.78e-30	6.5e-29	0	0	3.62588	244.796	CPNE9;RAB3C;PLXND1;DGKB;CPNE7;WIPF3;NPY2R;CXCL14;LAMP5;RGS4;SAMD14;AI593442;DPF1;HABP4;CAR11;IER5;LZTS3;KCNH3;TLE2;SPINK8;PRKCB;IGFBP4;ACTN2;STARD8;KCTD1;SLC6A11;KCTD4;LEMD1;PLPP6;PCP4;DAAM1;ADGRB2;PKP2;NPTXR;RIN1;NGEF;KCTD16;NECAB2;NECAB3;TMEM121B;HPCA;LYPD1;NEDD4L;MRI1;GPR83;AK5;IQGAP2;RASGRP2;RHOBTB2;KCNV1;SEC14L1;BAG2;HRH3;ZMAT4;PENK;GSG1L;OTOF;TSPAN5;DRD1;DRD2;ABCA1;PLK5;ARPP21;RASL10A;BCL11…
Genes Down-Regulated In iSPNs Of 6 Mon HdhQ111 Vs HdhQ20 PMID32681824	185/578	6.37e-30	8.62e-29	0	0	3.06471	206.027	CYFIP2;MTCH1;DGKB;WIPF3;GMNN;PPP2R2A;1110065P20RIK;SLC4A4;CNDP2;RPS6KA4;RGS4;DACH1;AI593442;AKT2;PPP4R4;CCDC97;CAR11;ANKRD13A;ANKS1B;EPM2A;CPA2;MBNL2;PRKCB;TPM2;AIP;UBALD1;KCTD1;FOXP1;KRT9;BCR;TIAM2;CACNB2;TPST1;CACNB3;PCP4;SELENOM;GAREM1;TBC1D20;AKAP9;GPD1;ASPHD2;NGEF;SNRPB;NECAB2;NAA60;ZBTB8A;ANAPC16;PEF1;ARL3;HPCA;PLD5;NEDD4L;ABHD6;MRPL12;KLC1;FOXO1;RAP1GAP;RHOBTB2;PGS1;DGUOK;RHOT2;ARHGAP20;RI…
Genes Up-Regulated In HD iPSCs After 80 D Of Differentiation GSE109534	786/4017	8.02e-30	1.08e-28	0	0	1.7155	114.931	PID1;NEXMIF;SAMD14;SAMD15;ZFYVE27;LSM11;DPYSL4;AKT3;LIPG;SAMD10;HES6;RBFOX2;HPCAL1;FRS3;RFX4;ORAI2;RABL2;NGEF;MTMR3;MEAF6;TARSL2;LYPD1;NYAP2;SLC30A10;ADAMTS10;PRKAR2B;D5ERTD579E;1110051M20RIK;CFAP69;CFAP65;ZBTB7C;GPR12;CADM1;TIPARP;MTERF2;NR2F1;NETO2;L1CAM;GRIN2B;FXYD2;SFXN3;NAPEPLD;DCHS1;PRRT4;DMRTC1A;ACHE;GPR26;LRRC10B;SHB;SHD;LETM2;SMPD3;TUBA1B;HEY1;SMPD1;2610301B20RIK;JAK2;DLGAP2;NEFH;STUM;AC…
Genes Changed In HD Vs Normal NPCs GSE118088	866/4547	3.57e-29	4.78e-28	0	0	1.67314	109.595	PID1;SPINT2;ZDBF2;COMTD1;SAMD14;SAMD15;DPYSL4;PPP4R4;DPYSL3;NDST3;ZFP286;HES6;RBFOX2;FIBCD1;CACNA2D2;RBP4;RFX4;RBP1;ASPHD2;ATF3;NGEF;SKAP2;LYPD1;FIGNL2;IQGAP2;NYAP2;SLC30A10;C7;HLCS;ADAMTS19;1110051M20RIK;CFAP69;SFN;PIP5K1B;CFAP65;ZBTB7C;JAG2;ABCA1;JUP;CADM1;TIPARP;NR2F1;L1CAM;GRIN2B;DAZL;PKIB;SFXN3;ACHE;SRPX;LAD1;LRRC10B;KCNC3;SHB;SMPD3;TMEM47;PANX2;HEY1;TMEM44;NEFL;NEFM;2610301B20RIK;DLGAP2;NEF…
Synaptic Neuropil Transcriptome PMID22578497	553/2601	6.31e-29	8.4e-28	0	0	1.84814	120.005	PNMAL1;RPL31;TMEM200A;WIPF3;SPINT2;HTR4;NDST1;PSMD5;AKT3;NDST3;RAVER2;STMN1;PRKCI;UNC13A;WDR73;GPR162;ADCY9;ARMC6;HECW2;MAP1A;ORAI2;ASPHD2;FAR2;RABL2;UBA52;NGEF;SF1;SLBP;LYPD1;NEDD4L;AGAP3;HSPH1;RIC8B;EPB41L1;FLRT3;PRKAR2B;ZFP180;SYNDIG1;CHST15;PIP5K1A;VPS16;S100A10;B3GALNT2;CDK17;NDFIP1;JUP;ARPP21;CADM1;GPR12;NCAPH2;PLK2;EIF2AK4;L1CAM;GRIN2B;WDR54;PKIB;UCK2;CPEB1;PPP5C;FXYD2;PCDHB6;SETD4;SRPX;AR…
Differentially Expressed Proteins In Striatum Of HD Q175 Mice PMID26900923	249/900	6.85e-29	9.07e-28	0	0	2.51423	163.052	CYFIP2;PATJ;TLNRD1;RPL31;WIPF3;DCAF8;PPP2R2A;ICAM5;DCAF5;PTPDC1;ZFYVE28;GLE1;RPS6KA4;CNST;ADGRA1;AKT2;PPP4R4;WDR91;CCDC97;AGFG2;ANKS1B;DYNC2H1;ACTN2;PRKCB;COG5;ACTN1;YOD1;BCR;PLPP6;GAREM1;ADGRB2;HECW2;AKAP9;RIN1;NGEF;KCTD16;NECAB2;GCDH;PCDH10;PNP2;AGAP3;IQGAP2;HNRNPLL;ACTR3B;DGUOK;STRIP2;SEC14L1;CHTF8;RDH11;FLRT3;PENK;INPP5J;KCNN2;PCK2;ARPP21;BCL11B;PDE2A;ERLIN1;DCLK1;CYLD;PPP1R1B;SFXN3;KYAT3;ANP…
HD Grade 3 Markers In Human Caudate Nucleus (HG-U133A) GSE3790	500/2291	1.02e-28	1.34e-27	0	0	1.89779	122.326	CYFIP2;PNMT;PNMAL1;ADARB1;HTR4;ADARB2;FNBP1L;ELK1;SLC4A4;PCMT1;DPYSL4;DPYSL3;NDST3;HOMER3;IER5;RNF138RT1;RBFOX2;WSB2;PRKCB;STARD7;CACNA2D2;SOX11;SCAMP1;BCR;RBP4;ADCY9;DAAM1;DAAM2;MAP1A;FAR2;RABL2;ATF6;ATF3;ATF4;SF1;LRPAP1;CTBP2;CTBP1;NEDD4L;IQGAP2;FAM149A;FAM171A1;ABR;HSPH1;RIC8B;PCDHA1;EPB41L1;PRKAR2B;CHST15;ZBTB7A;RREB1;EXPH5;S100A10;ABCA1;CDK17;ARPP21;H3F3B;NEBL;TIPARP;PLK2;NR2F1;NETO2;L1CAM;H…
Genes Down-Regulated In Expression In Cortex Of 11 Mon BACHD-deltaN17 HD Mice GSE64386	338/1373	1.35e-28	1.77e-27	0	0	2.17364	139.485	CPNE9;SLC23A3;FAAH;TLNRD1;SERPINE2;HDAC11;XYLT2;STMN4;ICAM5;ADARB1;FNBP1L;RXFP3;ADGRA1;AI593442;CPNE2;MPV17;SCN1B;STARD4;PAQR7;PRKCB;STARD8;ACTN1;FIBCD1;HPCAL1;SLC6A11;THAP1;GPR162;ADCY9;ADGRB2;RFX4;HECW2;KCNQ3;MXRA7;RIN1;1700016K19RIK;NGEF;KCTD15;NECAB3;LYPD1;OSGEP;ABR;STRIP2;SEC14L1;RIC8B;CHTF8;EPB41L1;ERI3;LDHD;OTOF;TNRC18;RREB1;VTI1B;WNT10A;ARPP21;GADD45B;PDE2A;PBX2;DDIT4L;NR1D1;DCLK1;NR2F6;S…
Genes Changed In Cerebellum Of 5 Week Old ATXN1[82Q] Vs WT GSE122099	208/701	1.56e-28	2.04e-27	0	0	2.75499	176.39	CPNE9;TLNRD1;LPGAT1;GDE1;MTFR1L;RPS6KA3;AI593442;PPP4R4;HOMER3;KIFAP3;AGFG2;SCN1B;ANKS1B;ATP6V1G2;PAQR7;WSB2;HPCAL1;CIRBP;CACNA2D2;ACSL4;MFSD12;MTURN;PLPP6;FNDC4;TRIM17;ORAI2;KCNQ3;FAR2;KCTD12;MXRA7;ASTN2;ACOT5;CCNO;NECAB2;NECAB3;TMTC1;STRIP2;RDH11;SYNDIG1;TSPAN5;1500009C09RIK;N4BP3;AMZ1;RAB11FIP4;LHPP;NTSR2;ABCA1;B3GALNT2;PCDH20;PDE2A;THAP12;NETO2;HSPA12A;NR2F6;SLC6A6;CPEB1;ZFP512B;PPP1R1B;CYSTM…
HD Markers In Human Caudate Nucleus (HG-U133B) E-AFMX-6	254/931	1.87e-28	2.43e-27	0	0	2.46725	157.52	SPARC;GDE1;ICAM5;ADARB1;HTR4;FNBP1L;PCMT1;DPYSL4;NDST3;HOMER3;LGALS8;IER5;RBFOX2;ATP6V1G2;MBNL2;ACTN2;PRKCB;ACTN1;ADGRA3;SCAMP1;BCR;RBP4;ADCY9;ADGRB2;DAAM1;SUB1;FAR2;MXRA7;SF1;LRPAP1;BEX2;CTBP2;NEDD4L;6430548M08RIK;ACTR3B;FAM149A;RIC8B;INPP5F;PRKAR2B;PENK;CHST15;KCNN2;SCN3B;SNX7;SCN3A;RREB1;EGR1;EGR4;LRRN3;ARPP21;BCL11B;PLK2;PDE2A;NR2F1;NETO2;L1CAM;DCLK1;CALY;CCDC88C;CALM3;PCSK2;RYR1;ACHE;SRPX;TE…
Expression In Striatum Of R6/2 HD Mice GSE62210	118/299	2.2e-28	2.84e-27	0	0	4.18928	266.793	CPNE9;CPNE7;GM19410;ZBTB20;MSMO1;HTR4;SLC8A2;RGS4;AI593442;PPP4R4;GM3558;PPP1R16B;KCNH3;KCNH4;IGFBP4;ANKRD45;SOX11;KRT9;RBP4;SLC9A5;RIN1;JCAD;CHRNA4;INSIG1;TMEM121B;ITPR1;STC1;GPR83;IQGAP2;RASGRP2;RHOBTB2;SEC14L1;HRH3;ZMAT4;PENK;INPP5J;GSG1L;DRD1;ABCA1;EGR1;PLK5;SYT2;LRRN3;RASL10A;PCDH20;HTR1D;DDIT4L;NETO2;GULP1;ARHGAP33;EFNA3;SYNDIG1L;PPP1R1B;CAPRIN2;RYR1;GPR26;KCNK9;LRRC10B;TSEN15;RASGRF2;GRM1;…
Mouse Cortex Corticothalamic Neuron Markers PMID19013282	765/3928	3.39e-28	4.35e-27	0	0	1.69591	107.271	PNMT;PATJ;SERPINE2;PNMAL1;DCAF8;SPINT2;HTR4;DCAF5;ALKBH6;DCAF4;PTPDC1;DPYSL4;PSMD5;ZXDB;DPYSL3;MEF2A;HES6;MED1;IAH1;PRKCB;COL23A1;FIBCD1;HPCAL1;SCAMP1;ZC2HC1C;GPR162;ADCY9;DAAM2;ARMC6;FAR1;FAR2;RABL2;PLBD2;ACOT3;LRPAP1;PIF1;SAR1A;CTBP2;MEAF6;TARSL2;FLII;PDGFB;ENDOD1;NEDD4L;WDR61;TAPBPL;IQGAP2;HIF1A;DEDD2;FAM171A1;HSPH1;PCDHA1;FLRT2;HLCS;EPB41L1;RDH11;FLRT3;LDHD;CHST15;PIP5K1A;AMZ1;SLC19A1;LHPP;ZB…
Genes Down-Regulated In Cerebellum Of 5 Week Old ATXN1[82Q] Vs WT GSE122099	184/591	4.2e-28	5.37e-27	0	0	2.93971	185.31	DGKG;CPNE9;CEP126;TLNRD1;KCNG4;LPGAT1;GPR63;GDE1;RNF19B;RORA;MSMO1;MTFR1L;BZW2;RPS6KA3;DACH1;AI593442;CNTNAP5B;FAM174B;PPP4R4;HOMER3;KIFAP3;AGFG2;SCN1B;ANKS1B;PPP1R16B;ATP6V1G2;PAQR7;MIGA2;WSB2;PPTC7;ADPRHL1;TPM2;USP3;HPCAL1;CACNA2D2;KCTD1;ACSL4;LMO7;ATP1B1;MFSD12;CACNB2;PLPP6;MYCL;PCP4;FNDC4;TRIM17;ORAI2;FAR2;KCTD12;ASTN2;NPTXR;ACOT5;CCNO;PDE9A;DGKH;NECAB2;ZFP346;DIPK1B;NECAB3;CABP7;CTTNBP2;HPCA…
The Global Proteome Data Of The Soluble Fraction From The Brains Of Q175 And WT Mice PMID31138642	760/3901	5.02e-28	6.38e-27	0	0	1.69505	106.549	CYFIP2;RPL31;WIPF2;WIPF3;DCAF8;FNBP1L;SLC4A4;GCSH;PCMT1;COMTD1;SAMD14;ZFYVE27;DPYSL4;PSMD5;AKT3;DPYSL3;WDR91;STMN1;ANKS1B;PRKCI;MBNL2;RBFOX2;UNC13A;IAH1;PRKCB;HPCAL1;CACNA2D2;PHKA1;SCAMP1;BCR;EML4;ADCY9;DAAM1;DAAM2;ARMC6;HECW2;MAP1A;RBP1;ACOT2;ACOT1;ASPHD2;PLBD2;VPS28;NGEF;SF1;LRPAP1;SAR1A;CTBP2;TARSL2;CTBP1;ENDOD1;NEDD4L;WDR61;AGAP3;IQGAP2;NYAP2;MRPL12;ABR;RHOT2;HSPH1;HLCS;EPB41L1;RDH11;PRKAR2B;…
Genes Changed In Chat-expressing Interneurons Of zQ175DN Vs WT PMID32681824	313/1252	1.11e-27	1.4e-26	0	0	2.20911	137.108	CPNE8;PID1;LPGAT1;UXS1;WIPF2;RAPH1;EMC10;PPP2R2A;ADARB1;ADARB2;DCAF5;HS6ST2;HS6ST3;GLE1;GOLGA4;RPS6KA2;DAG1;KIF21B;EPHB2;BTRC;DYNC2H1;MBNL2;SLC6A15;ALG5;HPCAL1;AP1B1;CSNK1D;HECW2;XRN2;KCNQ3;SIK3;FAR2;MAML3;ASTN2;ATP6V0D1;ATF6;CCDC82;KCTD16;NECAB2;MTMR3;PCDH15;TMTC1;NKAIN2;ABR;SEC14L1;RIC8B;PRRC1;FLRT2;EPB41L1;PRKAR2B;1110051M20RIK;ERI3;PENK;VPS8;SYNDIG1;DYM;PIP5K1B;TNRC18;SCN3B;ZBTB7C;CREBBP;RABG…
Genes Changed In Astrocytes Of HD Patients Vs Control PMID32681824	507/2362	2.44e-27	3.07e-26	0	0	1.85599	113.732	CYFIP2;PID1;SERPINE2;RAPH1;FNBP1L;SLC4A4;GPATCH8;DPYSL3;RAVER2;PKNOX1;ANKS1B;MBNL2;RBFOX2;COL23A1;HPCAL1;PHKA1;BCR;EML4;ADCY9;DAAM2;RFX4;MAP1A;FAR1;MAML3;ASTN2;ATF3;SF1;MTMR3;ANAPC16;CTBP2;NEDD4L;WDR61;AGAP3;SLC30A10;HIF1A;ABR;HSPH1;EPB41L1;EPB41L2;SYNDIG1;CHST15;S100A13;EXPH5;ZBTB7C;ABCA1;B3GALNT2;CREBBP;NDFIP1;ARPP21;CADM1;NEBL;TIPARP;POU6F2;PHC3;GLUD1;CPEB1;ADI1;NAPEPLD;PSMG4;CDK13;PAM;SETD4;S…
Genes Down-Regulated In Expression In Cerebrum Of 27 Wk R6/1 HD Mice GSE3621	141/403	2.48e-27	3.11e-26	0	0	3.4719	212.689	CPNE9;RAB3C;CPNE7;WIPF3;NPY2R;FAIM2;MSMO1;SLC4A4;CXCL14;CEP128;LAMP5;RGS4;CAR11;PPP1R16B;KCNH3;TLE2;SPINK8;PRKCB;STARD8;FIBCD1;KCTD1;SLC6A11;KCTD4;PCP4;NPTXR;RIN1;NGEF;KCTD16;NECAB3;CABP7;HPCA;LYPD1;ITPR1;AK4;GPR83;LTBP2;AK5;SMIM7;NDRG2;RASGRP2;CRHR1;KCNV1;STRIP2;GRK5;HRH3;LDHD;PENK;GSG1L;KCNN1;DRD1;DRD2;RREB1;GRIA3;NTSR2;MYH7B;PLK5;ARPP21;RASL10A;HTR1D;TMEM132A;DDIT4L;DCLK1;SYNDIG1L;MYO5B;PPP1R1…
Genes Changed In Sst/Npy-expressing Interneurons Of zQ175DN Vs WT PMID32681824	223/789	2.71e-27	3.37e-26	0	0	2.57657	157.617	CYFIP2;CPNE8;NEXMIF;WIPF3;PITPNA;ADARB1;DCAF5;GPATCH8;HS6ST3;RPS6KA3;PPP4R4;RPS6KA2;AKT3;LGALS8;BTRC;KIFAP3;AGFG2;MEF2A;EPHA4;EPHA6;VWA5B2;SYTL5;BCR;GAREM1;AKAP9;XRN2;TLN2;KCTD16;EPHA10;ADAMTS10;NKAIN3;RIC8B;FLRT2;EPB41L1;HLCS;ERI3;PENK;OTOF;SCN3A;NDFIP2;CADM1;SIAH3;LRBA;IQSEC3;RANBP17;GRIN2B;GLUD1;CPEB1;GKAP1;GIPC2;GRB2;GALNTL6;TENM1;AHCTF1;C2CD5;C2CD3;TENM4;KCNC3;PHF1;GRIK1;IDE;SIPA1L3;JPH4;DST…
Differentially Expressed Proteins In Striatum Of 10 Mon HD Q175 Mice Vs Q20 PXD006302	154/461	2.88e-27	3.57e-26	0	0	3.24362	198.223	CYFIP2;SPON1;TLNRD1;UBXN2B;DGKB;WIPF3;A430005L14RIK;RPS6KA4;SAMD14;PPP4R4;AKT3;HOMER3;SLC12A6;AGFG2;TBC1D10A;ANKS1B;LZTS3;PPP1R16B;MCCC2;MLIP;UNC13A;SLC30A3;PRKCB;ACTN2;ACTN1;HPCAL1;B630019K06RIK;YOD1;LMO7;WDR73;TMEM130;FOXP1;BCR;TIAM2;CACNB2;OLFM2;PCP4;ADCY9;HECW2;RRAGD;SPATA13;NPTXR;RIN1;NGEF;DGKI;JCAD;KCTD16;NECAB2;ZCCHC8;HPCA;ITPR1;MRI1;IQGAP2;NTS;RASGRP2;FOXO1;RAP1GAP;SEC14L3;ARHGAP20;SEC14L…
Genes Changed In Medulla Of 28 Week Old WT Mice Vs Atxn 1 154Q/2Q Mice Both Treated With Vehicle GSE114674	878/4681	2.91e-27	3.58e-26	0	0	1.63744	100.052	POP5;PID1;NEXMIF;A430005L14RIK;SCX;ACCS;PTPDC1;LSM11;PWWP2A;PKNOX1;ZFP286;MEF2A;HPCAL1;MRTFA;PHKA1;RC3H2;ATF6;NGEF;SF1;ATF4;PIF1;MTMR3;LYPD1;AGAP3;TAPBPL;SLC30A10;MRPL12;DEDD2;EPB41L1;D5ERTD579E;SYNDIG1;PIP5K1A;SFN;VTI1B;ZBTB7C;ABCA1;CREBBP;TIPARP;NEBL;NCAPH2;LRBA;PBX2;NETO2;NR2F6;DAZL;FAT1;NAPEPLD;DCHS1;GSTM6;DMRTC1A;PIGS;SRPX;LAD1;GPR26;LRRC10B;BHLHE41;SHB;SMPD3;JPH4;MED13;HEY1;NEFL;NEFM;SH3BGR…
Genes Down-Regulated In HD Grade 2 Markers In Human Caudate Nucleus (HG-U133B) GSE3790	166/519	6.82e-27	8.36e-26	0	0	3.04646	183.55	TLNRD1;CHRM1;LPGAT1;TUSC3;NEXMIF;WIPF3;CXCL14;CDH8;HS6ST2;HS6ST3;SYNPR;CNST;DACH1;AI593442;FAM162A;PPP4R4;HABP4;ANKS1B;EPHA4;STARD4;UNC13A;DGAT2;PRKCB;RALGAPA2;KCTD1;LMTK2;THOC3;SYTL5;KCTD4;SHISA9;TMEM130;FOXP1;TIAM2;ARMCX4;SUB1;CMPK2;ASPHD2;FAR2;MXRA7;NGEF;DGKI;JCAD;DGKH;BEX2;EPB41;PCDH10;TMEM63C;TMEM121B;SLC35D3;ZFP503;GPR85;NEDD4L;TMTC1;AGAP3;KLHL13;CACNA1E;TMEM25;STRIP2;ARHGAP20;RIC8B;PCDHA1;…
Genes Down-Regulated In CAG Length-Dependent Genes In 2 Mon Mouse Striatum PMID26900923	59/97	7.49e-27	9.14e-26	0	0	9.84192	592.057	ANKRD35;LRRC10B;PCSK9;1810020O05RIK;DMKN;FGF3;RGS4;RPS6KA4;DBP;PPP4R4;PMEPA1;RSPO1;ENPP5;KCNH4;CMC2;GPX6;UPB1;KRT9;TRAIP;THEG;CACNB3;RBP4;CYP2A5;ADORA2A;GPD1;SCN4B;RGS14;TMPRSS6;TCF7;NPL;PLCXD1;SBSN;CIART;SEC14L3;ACVR1C;SOHLH1;ABI3BP;PENK;CHN1;CLSPN;WNT4;PLK5;ARPP21;RASL10A;ARHGEF39;DDIT4L;SLC4A11;NETO2;DGAT2L6;POMC;MAS1;CD4;TMEM114;TOMM70A;GIPC2;PPP1R1B;1700001O22RIK;ANKRD63;IFI27L2B
Differentially Expressed Proteins In The Striatum Of R6/2 Vs WT PXD008099	138/394	7.96e-27	9.67e-26	0	0	3.47494	208.827	RAB3C;DGKB;WIPF3;PPP2R2A;ICAM5;SLC4A4;FBXO22;APMAP;PPP4R4;RPS6KA2;SACS;AGFG2;ANKS1B;LZTS3;PPP1R16B;SLC30A3;PRKCB;ACTN2;ACTN1;CIRBP;LMO7;THOC2;BCR;TIAM2;GPRIN1;GPD1;ACOT2;CMPK2;NPTXR;RIN1;NGEF;DGKI;JCAD;OSBP2;NECAB2;GLO1;HPCA;ITPR1;MRI1;RASGRP2;ACTR3B;CACNA1E;RAP1GAP;STRIP2;PCSK1N;BAG5;BRINP1;GRK2;PENK;INPP5J;DRD1;GRIA3;CDK17;OSBPL8;ARPP21;BCL11B;CCDC136;TMEM132A;PDE2A;L1CAM;CYLD;DIAPH2;UBLCP1;PPP…
PRC2 Deficiency Down-Regulated Genes At 6 Mon PMID27526204	68/125	1.09e-26	1.32e-25	0	0	7.57895	453.071	CPNE9;ACVRL1;RYR1;GASK1B;ABCD2;DGKB;LRRC10B;MTCL1;DMKN;RGS4;TRIM9;CHORDC1;SLC16A7;STK32A;ZFP882;SLC18A3;CAP1;KCND2;TRPC3;ACTN2;GPX6;GKN3;ETV1;ANO3;CYP2A5;ADORA2A;MYO3B;BANK1;AKAP9;PXDN;RGS7BP;JCAD;UBA6;SLC35D3;SYNPO2;NEXN;RASGRP2;SLC30A10;COCH;THBS4;RHOBTB2;CAMKK2;RASD2;SEC14L3;ACVR1C;SLITRK2;CYP11A1;ABI3BP;GCNT2;RGS20;CLSPN;DRD1;DRD2;RXRG;LINGO3;HTR1D;KLHL1;DDIT4L;KRT12;FANCB;GPR6;RPE65;ARHGAP33…
Genes Down-Regulated In HD Grade 3 Markers In Human Caudate Nucleus (HG-U133B) GSE3790	169/536	1.43e-26	1.72e-25	0	0	2.98416	177.58	TLNRD1;CHRM1;LPGAT1;TUSC3;NEXMIF;WIPF3;CXCL14;PTPDC1;CDH8;HS6ST2;HS6ST3;SYNPR;CNST;DACH1;AI593442;MSANTD1;FAM162A;PPP4R4;HABP4;ANKS1B;KCNH3;EPHA4;UNC13A;DGAT2;PRKCB;RALGAPA2;ISLR2;KCTD1;LMTK2;SYTL5;KCTD4;SHISA9;TMEM130;SHISA7;FOXP1;BCR;TIAM2;ARMCX4;OLFM2;OBSCN;ORAI2;ASPHD2;FAR2;MXRA7;NGEF;DGKI;DGKH;SPTBN4;BRSK2;PCDH10;TMEM63C;TMEM121B;SLC35D3;ZFP503;GPR85;NEDD4L;TMTC1;AGAP3;KLHL13;FBXO44;CACNA1E;…
Genes Up-Regulated In HD iPSCs After 130 D Of Differentiation GSE109534	691/3508	1.76e-26	2.11e-25	0	0	1.69962	100.787	PID1;PNMAL1;NEXMIF;1700001L19RIK;STMN4;DCAF5;SLC4A4;DCAF4;GLE1;SAMD14;ZFYVE27;DPYSL4;MSANTD1;AI593442;ZXDB;AKT3;WDR91;LIPG;PKNOX1;IER5;SAMD10;ANKS1B;MEF2A;HES6;MBNL2;RBFOX2;9330159F19RIK;WSB2;NHLRC3;HPCAL1;SOX11;WDR73;FRS3;RC3H2;GPR162;DAAM1;RFX4;MAP1A;RABL2;VPS28;NGEF;MTMR3;MEAF6;LYPD1;NEDD4L;NYAP2;SLC30A10;C9ORF72;ADAMTS10;FLRT2;ZFP180;D5ERTD579E;AMZ1;ZBTB7C;CDK17;PLK3;PLK5;NDFIP1;ARPP21;GPR12;…
Genes Changed In Cerebellum Of WT Mice Compared To Atxn1[82Q] KI Mice GSE114815	708/3615	1.78e-26	2.13e-25	0	0	1.6908	100.244	CYFIP2;PID1;TLNRD1;SERPINE2;SCX;ACCS;FNBP1L;DCAF5;ALKBH6;SLC4A4;PTPDC1;NDST1;PCMT1;SAMD14;CNST;LSM11;SCN11A;AKT2;PPP4R4;RAVER2;DPYSL3;HOMER3;PKNOX1;ANKS1B;RBFOX2;WSB2;DDX11;HPCAL1;CACNA2D2;GTPBP3;DAAM1;HECW2;ORAI3;ORAI2;ACOT2;FAR2;ASTN2;ACOT5;PLBD2;ATF3;NGEF;SKAP2;CTBP1;ENDOD1;AGAP3;IQGAP2;SLC30A10;MRPL12;HIF1A;FAM124A;RDH11;FLRT3;PRKAR2B;EPB41L2;LDHD;SYNDIG1;PIP5K1B;AMZ1;ZBTB7A;RREB1;ST3GAL2;LHP…
Expression In Striatum Of P62 KO; R6/2 HD Mice Vs P62 KO Mice GSE62210	177/575	2.02e-26	2.39e-25	0	0	2.88556	170.723	CPNE9;PLXND1;NEXMIF;GM19410;SAT2;MSMO1;SLC8A2;ZFYVE28;RGS4;AI593442;PPP4R4;GM3558;SLC16A6;CAR11;AGFG2;IL13RA1;LZTS3;PPP1R16B;KCNH3;KCNH4;PHYH;TAGAP1;IGFBP4;ACTN2;TPM1;CIRBP;SOX11;TRAIP;KRT9;GPR165;RBP4;CACNB3;OBSCN;SLC9A5;GAREM1;ZFP40;AKAP9;GM3667;GPD1;RIN1;ATF6;NGEF;JCAD;ZCCHC8;BEX2;INSIG1;TMEM121B;HPCA;ITPR1;GPR83;IQGAP2;RASGRP2;FOXO1;RHOBTB2;STK3;SEC14L1;HRH3;PENK;CFAP69;INPP5J;GSG1L;DRD1;IGFB…
Genes Up-Regulated In Human HD Neurons Vs Control Neurons PMID32070434	292/1162	3.35e-26	3.95e-25	0	0	2.21485	129.921	SPARC;SERPINE2;WIPF3;ELK1;SAMD14;FRAT1;GOLGA4;CNST;CHORDC1;DPF1;PWWP2A;IER5;EPHA4;MBNL2;STARD7;PRKCB;ACTN1;HPCAL1;CACNA2D2;YOD1;TMEM170B;MFSD12;MTURN;TIAM2;GAREM1;AKAP9;HSBP1L1;CCNO;ATF4;SKAP2;KCTD16;SLBP;SPTBN4;ANAPC16;CTBP1;ZBTB1;TMTC1;AGAP3;ZBTB4;HIF1A;DEDD2;FAM171A1;HSPH1;SEC14L1;FLRT2;PRKAR2B;FLRT3;CHST15;TSPAN5;ZBTB7A;SCN3A;CREBBP;PLK5;LRRN3;ARPP21;GADD45B;ZFP638;PDE2A;NR1D1;L1CAM;GRIN2B;NR…
Differentially Expressed Genes In Control NPCs Vs HD NPCs GSE93767	790/4155	7.86e-26	9.24e-25	0	0	1.64303	94.9753	NEXMIF;ACCS;PTPDC1;NDST1;LSM11;PPP4R4;NDST3;LIPG;SAMD10;RBFOX2;SCAMP1;FRS3;RFX4;RBP1;ORAI2;ASPHD2;FAR2;SLBP;ZBTB8A;ABCB4;FLII;LYPD1;IQGAP2;HLCS;ADAMTS19;EPB41L2;1110051M20RIK;ABCA1;JUP;CADM1;NEBL;L1CAM;NR2F6;DAZL;PKIB;FAT1;NAPEPLD;DCHS1;SFXN2;PRRT4;DMRTC1A;SRPX;LAD1;SHD;LETM2;MMP23;TMEM47;PANX2;HEY1;TMEM44;ARG2;ELOVL2;SLC39A11;SLC39A10;ELOVL6;DUSP9;FAHD2A;SLC7A4;SLC7A8;BDH1;KCNMA1;ADSSL1;HAP1;RAP…
CA1 Overexpressed Genes Compared To CA3 Newrzella PMID17937787	149/455	2.09e-25	2.44e-24	0	0	3.14275	178.597	CPNE8;SPON1;WDSUB1;TMEM200A;WWC1;TUSC1;1700001L19RIK;ZDHHC1;GBA2;TMEM263;TXN2;RESP18;SLC16A6;COTL1;CLBA1;MLIP;SPINK8;FIBCD1;KRT1;EMSY;FOXP1;BCR;KCTD8;PLPP6;RBP4;FNDC4;ORAI3;RRAGD;EHBP1L1;SIK3;NGEF;KCTD15;JCAD;PDE9A;NECAB2;KLHL14;MGST3;ARHGEF28;NTM;SLC1A1;LYPD1;ITPR1;ILDR2;LIN7A;RASAL1;TMTC1;KLHL13;LTBP3;CACNA1G;GRK3;HRH3;PCBP4;CYP11A1;ZFP180;ZMAT4;PENK;CDH22;PIP5K1B;KCNN2;IGFBP6;AMZ1;RAB11FIP3;S1…
Genes Changed In iSPNs Of 6 Mon HdhQ111 Vs HdhQ20 PMID32681824	340/1441	3.2e-25	3.72e-24	0	0	2.04874	115.555	CYFIP2;SPARC;WIPF3;OGFOD3;RAPH1;PPP2R2A;SLC4A4;NUDT4;GCSH;RPS6KA4;DPYSL4;ADGRA1;AI593442;AKT2;PPP4R4;DPYSL3;CCDC97;KIF21B;ANKS1B;DYNC2H1;MBNL2;PRKCB;RSAD1;SOX11;SLC6A11;YOD1;TMEM170B;KRT9;BCR;TIAM2;GAREM1;AKAP9;ACOT1;ASPHD2;NGEF;NECAB2;NAA60;ZBTB8A;ANAPC16;PCDH10;ENDOD1;NEDD4L;MRPL12;PGS1;DGUOK;STRIP1;RHOT2;SEC14L1;RIC8B;FLRT2;EPB41L1;PENK;LDHD;AI413582;KCNN2;N4BP2;S100A10;SLC19A2;ACD;LRRN3;ARPP2…
Genes Up-Regulated In The Striatum Of zQ175 KI Mice Vs WT GSE123657	461/2137	3.45e-25	4e-24	0	0	1.85195	104.313	PNMAL1;NEXMIF;WDR83;SPINT2;PTPDC1;GCSH;GLE1;SAMD14;DPYSL4;DPYSL3;NDST3;WDR91;SAMD10;UNC13B;HES6;STARD7;B630019K06RIK;SOX11;SPIN2C;ACOT1;RABL2;VPS28;RNF122;SKAP2;PIF1;ABCB4;TAPBPL;TRP53RKA;PCDHA1;RDH11;1110051M20RIK;CFAP65;EXPH5;ZBTB7C;GM10471;CREBBP;NDFIP1;EDEM1;NR2F1;POU6F2;EIF2AK4;ELL2;TMEM196;MEX3A;ARL2BP;FAT1;NAPEPLD;PCDHB5;UNC119;DMRTC1A;PHF2;ZFP367;TGFB1I1;LETM2;TUBA1B;TCTN3;SMPD1;TCTN2;TRI…
Genes Down-Regulated In Expression In The Heart Of Mice Inducibly Expressing Celf1 For 12 H GSE56185	649/3289	7.36e-25	8.49e-24	0	0	1.69013	93.9182	CYFIP2;TRIR;TLNRD1;WIPF2;XYLT2;SCX;EMC10;SPINT2;ACCS;DCAF5;ALKBH6;ZFYVE28;NDST1;COMTD1;CNST;ZFYVE27;AI593442;PPP4R4;ZXDB;WDR91;HOMER3;IER5;SAMD10;MBNL2;DDX11;STARD8;HPCAL1;CACNA2D2;SCAMP1;BCR;ZC2HC1C;ADCY9;DAAM2;MAP1A;ORAI2;ATF6;PLBD2;ATF3;NAA60;LRPAP1;FLII;PDGFB;AGAP3;TAPBPL;ADAMTS10;DEDD2;TRP53RKA;HLCS;EPB41L1;PRKAR2B;EPB41L2;RRS1;ZBTB7A;ST3GAL2;S100A10;JAG2;ABCA1;MYH7B;CREBBP;JUP;GTF2IRD2;NCAP…
CAG Length-Dependent Genes In 2 Mon Mouse Striatum PMID26900923	68/132	7.58e-25	8.7e-24	0	0	6.74725	374.739	ANKRD35;LRRC10B;PTPRO;PCSK9;1810020O05RIK;DMKN;FGF3;RGS4;RPS6KA4;DBP;DPYSL4;PPP4R4;LIPG;PMEPA1;RSPO1;ENPP5;KCNH4;CMC2;GPX6;NPY1R;UPB1;DSG1C;KRT9;TRAIP;THEG;CACNB3;RBP4;CYP2A5;ADORA2A;TNNT2;ARMCX6;GPD1;SCN4B;RGS14;TMPRSS6;TCF7;NPL;PLCXD1;SBSN;CIART;SEC14L3;ACVR1C;SOHLH1;ABI3BP;PENK;CHN1;CLSPN;WNT4;PLK5;ARPP21;RASL10A;ARHGEF39;PCDH20;KLHL1;DDIT4L;SLC4A11;NETO2;DGAT2L6;POMC;MAS1;CD4;TMEM114;TOMM70A;…
Genes Up-Regulated In Expression In Ctip2 Null Vs WT Mouse Striatum GSE9330	297/1211	8.12e-25	9.28e-24	0	0	2.14288	118.866	CPNE8;SPON1;PATJ;LPGAT1;CMAS;PNMAL1;NEXMIF;HDAC11;OGFOD3;STMN4;SPINT2;ZFP606;ADARB2;GPATCH8;ZDBF2;DPYSL3;RESP18;HABP4;KIF21B;PKNOX1;EPHB2;SAMD10;RNF138RT1;9330159F19RIK;HPCAL1;CACNA2D2;B630019K06RIK;SOX11;ACSL4;ZFP618;FNDC9;RC3H2;SUB1;RBP1;SPATA13;ACOT2;RABL2;KCTD15;SLBP;CTBP2;EPB41;ZFP503;PCDH15;ENDOD1;NEDD4L;OMA1;NKAIN2;HSPH1;PRRC1;5730409E04RIK;RACGAP1;PCDHA1;PRKAR2B;DPH3;TSPAN5;SCN3B;AMZ1;N4B…
Genes Up-Regulated In Expression In Friedreich Ataxia iPSCs-derived Neurons Vs iPSCs GSE65399	539/2617	1.25e-24	1.42e-23	0	0	1.76072	96.9116	CYFIP2;TRIR;PID1;PNMAL1;NEXMIF;RAPH1;STMN4;ADARB1;DCAF5;FNBP1L;PCMT1;SAMD14;DPYSL4;LIPG;ZFP286;ANKS1B;HES6;MBNL2;RBFOX2;WSB2;HPCAL1;SOX11;SCAMP1;FRS3;DKK2;GPR162;DAAM1;HECW2;MAP1A;RABL2;ATF6;VPS28;CTBP2;MEAF6;CTBP1;LYPD1;NEDD4L;AGAP3;FAM171A1;ABR;FLRT2;PCDHA1;FLRT3;1110051M20RIK;D5ERTD579E;VPS16;ZBTB7C;FZD1;CREBBP;NDFIP1;ARPP21;CADM1;H3F3B;GTF2IRD2;PLK2;NR2F1;THAP12;EIF2AK4;NETO2;GPR137C;SQLE;MEX…
Genes Down-Regulated In HD Grade 0 Markers In Human Caudate Nucleus (HG-U133A) GSE3790	145/444	1.28e-24	1.45e-23	0	0	3.1265	172.004	CYFIP2;PID1;DGKB;TUSC3;PCDH11X;LAMP5;RGS4;PCMT1;BASP1;FAM162A;SACS;CAR11;FAM3C;KIFAP3;LGALS8;TMEM14A;RGS7;KCNH2;PPP1R16B;RAB2A;MBNL2;RBFOX2;ATP6V1G2;PRKCB;ACTN2;NPY1R;LMO7;SCAMP1;CASD1;FOXP1;PCP4;SUB1;MXRA7;LY6H;ISCU;SLBP;BEX3;BEX2;ARL3;HPCA;SLC1A1;ITPR1;NEDD4L;ACTR3B;FAM149A;RAP1GAP;PCSK1N;HSPH1;BRINP1;INPP5F;PRKAR2B;PENK;CHST15;CAMTA1;DRD2;SCN3B;TAC1;SCN3A;GRIA3;SYT5;OSBPL8;PRNP;TCAF1;ARPP21;BC…
Differentially Expressed Genes In Cerebellum Of 6 Mon HD Q140 Mice Vs Q20 GSE78270	535/2611	6.86e-24	7.74e-23	0	0	1.74644	93.1478	CYFIP2;POP5;WIPF3;RAPH1;SCX;EMC10;STMN4;SPINT2;ADARB1;DCAF5;ALKBH6;NDST1;COMTD1;LSM11;SCN11A;PPP4R4;ZXDB;AKT3;RAVER2;STMN1;ANKS1B;MEF2A;HES6;PRKCI;STARD4;MBNL2;RBFOX2;PRKCB;CACNA2D2;DAAM1;DAAM2;MAP1A;RBP1;MAML3;ASTN2;ATF6;NGEF;MTMR3;TARSL2;NEDD4L;MRPL12;NYAP2;HIF1A;ADAMTS10;ANAPC11;ABR;HLCS;RDH11;FLRT3;D5ERTD579E;SYNDIG1;CFAP69;CFAP65;VTI1B;ABCA1;CREBBP;PLK5;CADM1;TIPARP;LRBA;THAP12;NETO2;L1CAM;E…
HD Grade 1 Markers In Human Caudate Nucleus (HG-U133A) GSE3790	100/257	1.09e-23	1.23e-22	0	0	4.07109	215.246	DGKB;TUSC3;LAMP5;RGS4;DACH1;SEMA6A;ACTN2;PRKCB;ACTN1;LMO7;FOXP1;BCR;CACNB2;PCP4;DGKI;RTN2;LRPAP1;CTBP2;HPCA;ITPR1;RASGRP2;ACTR3B;FAM149A;RAP1GAP;SNN;HSPH1;PRKAR2B;CHST15;CAMTA1;DRD1;SCN3B;DRD2;TAC1;SYT5;TCAF1;BCL11B;EGR4;PLK2;NR2F1;NETO2;NSG1;DCLK1;GNAO1;DIAPH2;NBEA;CCDC88C;PI4KA;CALM3;PCSK2;SRPX;SNAP25;MCTP1;TMEM45A2;LDB2;RYR3;NRGN;ADAMTS3;CAMKV;ENC1;NEFL;NEFM;ME3;PRMT8;ACTL6B;KCND2;MMD;TMEM255A…
Genes Up-Regulated In Expression In Normal iPSCs-derived Neurons Vs iPSCs GSE65399	519/2519	1.11e-23	1.24e-22	0	0	1.75485	92.7524	CYFIP2;TRIR;PID1;PNMAL1;NEXMIF;STMN4;ADARB1;DCAF5;PCMT1;SAMD14;DPYSL4;LIPG;STMN1;IER5;ANKS1B;HES6;MBNL2;RBFOX2;9330159F19RIK;WSB2;HPCAL1;SOX11;FRS3;DKK2;GPR162;DAAM1;HECW2;MAP1A;RABL2;UBA52;VPS28;MTMR3;MEAF6;CTBP1;LYPD1;ENDOD1;NEDD4L;AGAP3;FAM171A1;ABR;FLRT2;FLRT3;1110051M20RIK;D5ERTD579E;VPS16;ZBTB7C;FZD1;CREBBP;NDFIP1;CADM1;H3F3B;GTF2IRD2;NR2F1;NETO2;L1CAM;GPR137C;SQLE;MEX3A;RNF103;ARL2BP;DCHS1…
HD Grade 0 Markers In Human Caudate Nucleus (HG-U133A) GSE3790	151/482	1.58e-23	1.75e-22	0	0	2.94227	154.481	CYFIP2;PID1;PLXND1;DGKB;TUSC3;PCDH11X;LAMP5;RGS4;PCMT1;BASP1;FAM162A;SACS;CAR11;FAM3C;KIFAP3;LGALS8;TMEM14A;RGS7;KCNH2;PPP1R16B;RAB2A;MBNL2;RBFOX2;ATP6V1G2;PRKCB;ACTN2;NPY1R;LMO7;SCAMP1;CASD1;FOXP1;PCP4;SUB1;MXRA7;LY6H;ISCU;SLBP;BEX3;BEX2;ARL3;HPCA;SLC1A1;ITPR1;NEDD4L;KLC1;ACTR3B;FAM149A;RAP1GAP;PCSK1N;HSPH1;BRINP1;INPP5F;PRKAR2B;PENK;CHST15;CAMTA1;DRD2;SCN3B;TAC1;SCN3A;GRIA3;SYT5;OSBPL8;PRNP;TCA…
HD Grade 2 Markers In Human Caudate Nucleus (HG-U133B) GSE3790	237/915	3.38e-23	3.74e-22	0	0	2.28316	118.134	LPGAT1;TLNRD1;NEXMIF;WIPF3;HS6ST2;HS6ST3;SYNPR;CNST;AI593442;PPP4R4;HABP4;ANKS1B;HES6;EPHA4;STARD4;UNC13A;PRKCB;SYTL5;MTURN;TIAM2;GAREM1;SNORC;CRISPLD1;DAAM1;RFX4;SUB1;ASPHD2;FAR2;MXRA7;NGEF;KCTD15;ADCYAP1R1;BEX2;EPB41;PCDH10;TMEM63C;SLC35D3;ZFP503;NEDD4L;TMTC1;AGAP3;OMA1;STRIP2;FAM124A;RIC8B;PCDHA1;EGR1;SMIM10L2A;NDFIP2;NDFIP1;CADM1;ARPP21;BCL11B;ZFP638;NEBL;PCDH20;NETO2;ELL2;TMEM196;DCLK1;GPR13…
Expression In The Heart Of Mice Inducibly Expressing Celf1 For 12 H GSE56185	686/3576	5.87e-23	6.47e-22	0	0	1.63245	83.5649	CYFIP2;TRIR;TLNRD1;WIPF2;XYLT2;SCX;EMC10;SPINT2;ACCS;HTR4;DCAF5;ALKBH6;ZFYVE28;NDST1;COMTD1;CNST;ZFYVE27;AI593442;PPP4R4;ZXDB;WDR91;HOMER3;IER5;SAMD10;MBNL2;DDX11;STARD8;HPCAL1;CACNA2D2;SOX11;SCAMP1;BCR;ZC2HC1C;ADCY9;DAAM2;MAP1A;ORAI2;FAR1;FAR2;ATF6;PLBD2;ATF3;ACOT3;NAA60;LRPAP1;FLII;PDGFB;AGAP3;TAPBPL;ADAMTS10;DEDD2;TRP53RKA;TERT;HLCS;EPB41L1;PRKAR2B;EPB41L2;RRS1;ZBTB7A;ST3GAL2;S100A10;JAG2;ABCA…
Expression In HD180i.5 NSCs From HD Patient Vs NSCs From Healthy Controls GSE37517	755/4027	1.22e-22	1.34e-21	0	0	1.59748	80.6105	CYFIP2;SERPINE2;PNMAL1;TMEM200A;NEXMIF;WIPF3;RAPH1;STMN4;ADARB1;ACCS;SLC4A4;GCSH;NDST1;AKT2;PPP4R4;NDST3;LIPG;STMN1;PKNOX1;SAMD10;MEF2A;UNC13B;RNF138RT1;UNC13A;IAH1;WSB2;PRKCB;DDX11;STARD8;CACNA2D2;PHKA1;SOX11;SCAMP1;BCR;DAAM2;RFX4;ORAI3;ACOT2;ACOT1;ASPHD2;FAR2;MAML3;ACOT5;ATF3;VPS28;NGEF;RNF122;ACOT3;PNP2;ABCB4;ENDOD1;NEDD4L;TAPBPL;IQGAP2;C9ORF72;ADAMTS10;FAM149A;FAM124A;FLRT2;CHST15;ST3GAL2;EXP…
Genes Up-Regulated In Expression In H9 Line NSCs Vs ESCs GSE34201	743/3950	1.24e-22	1.35e-21	0	0	1.60189	80.8047	CYFIP2;TRIR;TLNRD1;PNMAL1;ADARB1;DCAF5;SLC4A4;GLE1;NDST1;SAMD14;ZFYVE27;LSM11;DPYSL4;AKT3;LIPG;STMN1;HOMER3;MPV17;IER5;ANKS1B;HES6;MBNL2;RBFOX2;STARD8;HPCAL1;SOX11;FRS3;DKK2;GTPBP3;GPR162;ADCY9;DAAM2;HECW2;RFX4;MAP1A;ORAI2;SPIN2C;RABL2;MAML3;ASTN2;ATF6;ATF3;VPS28;RNF122;SKAP2;ATF4;SLBP;NAA60;LRPAP1;MTMR3;MEAF6;CTBP1;ABCB4;PDGFB;LYPD1;ENDOD1;FIGNL2;AGAP3;C9ORF72;ANAPC11;TRP53RKA;FAM171A1;ABR;FLRT2…
Differentially Expressed Genes In Cerebellum Of 6 Mon HD Q175 Mice Vs Q20 GSE73468	582/2933	1.29e-22	1.4e-21	0	0	1.68255	84.8049	TRIR;SERPINE2;NEXMIF;WIPF3;XYLT2;DCAF5;SLC4A4;COMTD1;SAMD14;MSANTD1;AI593442;SCN11A;NDST3;STMN1;IER5;MEF2A;MBNL2;EML4;EML5;GPR162;DAAM2;RFX4;ASPHD2;MAML3;UBA52;PLBD2;NGEF;LRPAP1;CTBP1;ENDOD1;NEDD4L;TAPBPL;NYAP2;MRPL12;ADAMTS10;FAM149A;ABR;HLCS;EPB41L1;FLRT3;1110051M20RIK;GSG1L;LHPP;GM10471;PRPF38B;PLK5;NDFIP1;ARPP21;NEBL;GTF2IRD2;EIF2AK4;NR1D1;PKIB;SQLE;SLC6A6;CPEB1;UCK1;ARL2BP;FNDC10;PSMG4;GSTM6…
Genes Down-Regulated In Expression In 9 Wk TIF-IA KO HD Mice GSE29647	137/430	3.37e-22	3.65e-21	0	0	3.00641	148.646	RAB3B;SPON1;SLC4A4;GBA2;GPATCH8;RGS4;NDST1;CCND2;DPYSL4;AKT2;SESN1;RPS6KA2;OSBP;KIFAP3;SLC12A6;PPFIA4;MED1;RNF44;MUSK;ACTN2;LIMCH1;ACTN1;MRTFA;EPDR1;SCAMP1;TUG1;ADCY9;EHBP1L1;GPD1;ATP6V0D1;ATF6;TRIM11;ANKRD17;KMT2E;ISYNA1;KMT2A;SDC3;SLC41A1;GPR83;FOXO1;GMCL1;RHOBTB2;SLC9A1;SEC14L1;BRINP1;HLCS;CHST15;SCN3B;NDFIP2;CD163;CADM1;SEC16A;TMEM132A;DDIT4L;DNAJC13;TDRD7;DCLK1;CNOT6;FXYD2;SFXN3;CREBRF;PI4KA…
Down-regulated Genes In Striatum Of 2 Mon HD Q175 Mice Vs Q20 PMID26900923	41/60	6.65e-22	7.17e-21	0	0	13.6034	663.342	ANKRD35;RGS14;TMPRSS6;SBSN;FGF3;RGS4;SEC14L3;DBP;GPR153;SOHLH1;PPP4R4;ABI3BP;PENK;CLSPN;ENPP5;WNT4;KCNH4;PLK5;ARPP21;RASL10A;GPX6;DDIT4L;SLC4A11;NETO2;FNDC9;DGAT2L6;UPB1;KRT9;TRAIP;POMC;THEG;MAS1;CACNB3;RBP4;TMEM114;ADORA2A;GPD1;GIPC2;1700001O22RIK;SCN4B;IFI27L2B
Caudate Nucleus Coexpressed Gene Module PMID17101986	78/182	8.15e-22	8.75e-21	0	0	4.76931	231.593	SCARB1;ACHE;SNAP25;DOCK4;TMEM151B;ONECUT2;DGKB;CRYBG3;WWC1;GRIK5;MAST1;PPP2R2A;FNBP1L;RYR3;PIK3C2B;DACH1;ADAMTS3;SIX3;ME3;HRAS;PPFIA3;PPP1R16B;TLE4;ACTN2;ACTN1;PHKA1;ANO3;BCR;GPR162;PCP4;DAAM1;ADORA2A;SIK3;RARB;MXRA7;SOS2;JCAD;COL17A1;LRPAP1;RGS14;HPCA;ARL2;RASGRP2;FOXO1;RAP1GAP;COCH;FAM171A1;RAB40B;DNAJB6;SNX27;EPB41L2;GNG7;PPP1R7;PENK;CHST15;TSPAN5;RGS20;PIP5K1B;DRD1;NCDN;STX3;TAC1;RXRG;TCAF1;A…
Genes Down-Regulated In Htt-N171-82Q Changed Genes In Rat Striatal Neurons GSE1918	116/339	8.84e-22	9.46e-21	0	0	3.33189	161.521	RAB3B;PATJ;SPARC;WIPF3;RAPH1;STMN4;ADARB1;BZW2;GPATCH8;ETS2;NUDT4;RGS4;SYNPR;BASP1;STMN1;EPHA4;TLE2;ACTN2;LIMCH1;PRKCB;MAGI3;LMO7;ATP1B1;FOXP1;BCR;CACNB2;PCP4;OLFM3;TNIK;NGEF;NECAB2;KMT2E;DDX6;INSIG1;NTM;SLC1A1;ITPR1;KLHL13;BRINP1;HRH3;PRKAR2B;PENK;PMVK;SYNDIG1;TSPAN5;DRD1;SCN3B;SCN3A;GRIA3;EGR1;ARPP21;PLK2;PDE2A;6330403K07RIK;DCLK1;GNAO1;PTPRD;PLCXD3;MYO5B;PPP1R1B;GSK3B;HIP1;PTPRF;RYR3;NRGN;C1QT…
Genes Changed In Human Asymptomatic HD BA9 Vs HD Caudate GSE129473	347/1546	9.18e-22	9.78e-21	0	0	1.91386	92.7063	CPNE9;PNMT;SPON1;OXTR;SPARC;TMEM200A;CPNE7;AQP5;FNBP1L;NUDT4;HS6ST3;LSM11;ADGRA1;RESP18;STMN1;SOX9;SCN1B;EPHA4;ATP6V1G2;9330159F19RIK;ARL15;COL23A1;HPCAL1;PHKA1;VWA5B2;SYTL5;FRS3;THEG;SFRP4;GPR162;CARHSP1;RFX4;SPATA13;TRIB3;ENTHD1;SPTBN4;NECAB3;SLC35D3;ZFP503;LYPD1;TMTC1;TAPBPL;PPL;HIF1A;CRHR1;NKAIN2;STRIP1;STRIP2;RIC8B;C7;TERT;PENK;SYNDIG1;INPP5J;KCNN1;TSPAN5;OTOF;PIP5K1B;KCNN2;KCNN3;N4BP3;SCN3B…
Genes Changed In Astrocytes Of HdhQ170 Vs HdhQ20 PMID32681824	175/617	9.28e-22	9.84e-21	0	0	2.56026	123.992	CYFIP2;DGKG;MTCH1;RAB3C;RAB3A;NEXMIF;FAIM2;ETS2;ZDBF2;LAMP5;PPP1CB;DOCK10;SAMD15;DPYSL4;BASP1;FRRS1L;AKT3;ARHGDIB;SACS;TUNAR;FAM3C;SLC12A6;LZTS3;MEF2A;ZFP579;MLIP;RBFOX2;AGTPBP1;ATP6V1G2;SLC6A15;ZBTB37;CIRBP;NPY1R;CASK;YOD1;UPB1;SHISA7;KRT9;OLFM3;GAREM1;NCL;LY6H;DGKI;JCAD;DDX5;ARL3;INSIG1;TMEM59L;ITPR1;LIN7A;6430548M08RIK;AK5;NYAP2;KLC1;ARHGAP21;HSPH1;PRKAR2B;SNTG1;PENK;UBC;CHST15;CAMTA1;SCN3B;TA…
Genes Changed In Cerebellum Of ATXN1[82Q]V591A;S602D Vs WT Mice GSE108255	577/2928	1.14e-21	1.2e-20	0	0	1.6643	80.2598	TRIR;PID1;RPL31;WIPF2;SCX;ELK1;PCMT1;SAMD15;AI593442;PPP4R4;STMN1;HOMER3;ANKS1B;HES6;MBNL2;WSB2;HPCAL1;CACNA2D2;UPB1;RC3H2;GTPBP3;BCR;ADCY9;DAAM2;ORAI3;ORAI2;FAR2;ASTN2;ACOT5;NGEF;SF1;ATF4;MTMR3;FLII;XKRX;HSPH1;RDH11;FLRT3;PRKAR2B;LDHD;SYNDIG1;CHST15;PIP5K1A;PIP5K1B;AMZ1;ZBTB7A;LHPP;VTI1B;JAG2;B3GALNT2;PLK5;NDFIP1;SETD1B;NR2F1;THAP12;NETO2;L1CAM;GRIN2B;GPR137C;PKIB;SLC6A6;CPEB1;MEX3A;ZFAT;FNDC10;…
Up-regulated Genes In Cerebellum Of ATXN1[82Q]V591A;S602D Vs WT Mice GSE108255	577/2928	1.14e-21	1.2e-20	0	0	1.6643	80.2598	TRIR;PID1;RPL31;WIPF2;SCX;ELK1;PCMT1;SAMD15;AI593442;PPP4R4;STMN1;HOMER3;ANKS1B;HES6;MBNL2;WSB2;HPCAL1;CACNA2D2;UPB1;RC3H2;GTPBP3;BCR;ADCY9;DAAM2;ORAI3;ORAI2;FAR2;ASTN2;ACOT5;NGEF;SF1;ATF4;MTMR3;FLII;XKRX;HSPH1;RDH11;FLRT3;PRKAR2B;LDHD;SYNDIG1;CHST15;PIP5K1A;PIP5K1B;AMZ1;ZBTB7A;LHPP;VTI1B;JAG2;B3GALNT2;PLK5;NDFIP1;SETD1B;NR2F1;THAP12;NETO2;L1CAM;GRIN2B;GPR137C;PKIB;SLC6A6;CPEB1;MEX3A;ZFAT;FNDC10;…
Genes Up-Regulated In Mouse Spinal Cord Derived OPCs From P7 Vs E13.5 Mice PMID30078729	608/3126	1.62e-21	1.7e-20	0	0	1.64223	78.6119	CYFIP2;POP5;SERPINE2;PNMAL1;NEXMIF;EMC10;STMN4;ZFYVE28;GCSH;MPV17;ANKS1B;RNF138RT1;STARD4;PRKCB;STARD7;B630019K06RIK;SCAMP1;SYTL5;GPR162;GPR165;MAP1A;ACOT2;ACOT1;ASPHD2;NGEF;RNF122;TARSL2;ABCB4;PDGFB;LYPD1;ENDOD1;HIF1A;FAM149A;FAM124A;RDH11;PRKAR2B;EPB41L2;LDHD;RRS1;S100A13;GSG1L;AMZ1;PLK3;MYH7B;NDFIP1;CADM1;NEBL;THAP12;NR1D1;ELL2;TMEM196;TMEM199;PKIB;SQLE;SLC6A6;CYLD;GLUD1;UCK2;CPEB1;ARL2BP;ADI1…
Genes Up-Regulated In Succinate Dehydrogenase Inhibitor 3-NP Dependent Expression In WT Mouse Striatal Cells GSE3583	830/4554	1.94e-21	2.02e-20	0	0	1.55073	73.9584	POP5;PID1;UXS1;A430005L14RIK;PTPDC1;COMTD1;ZFYVE27;DPYSL3;NDST3;MEF2A;HES6;STARD7;HPCAL1;MRTFA;SCAMP1;BCR;EML4;EML5;ORAI2;FAR1;ATF6;PLBD2;ATF3;NGEF;SKAP2;MTMR3;TARSL2;PDGFB;AGAP3;IQGAP2;MRPL12;PRKAR2B;PIP5K1A;AMZ1;B3GALNT2;ABCA1;PRPF38B;TIPARP;EDEM1;ERLIN1;PBX2;EIF2AK4;NETO2;UCK2;UCK1;FAT1;NAPEPLD;SFXN2;LIN54;LAD1;SHB;TMEM44;2610301B20RIK;JAK2;UPF1;ARG2;DUSP1;WNT9A;DUSP9;FAHD2A;SLC7A4;PHF20L1;MED…
Genes Down-Regulated In Expression In The Heart Of Mice Inducibly Expressing Celf1 For 7 D GSE56185	711/3782	1.95e-21	2.02e-20	0	0	1.5912	75.8794	PNMT;CYFIP2;POP5;A430005L14RIK;SCX;DCAF8;WDR83;EMC10;SPINT2;ALKBH6;ELK1;SLC4A4;DCAF4;CNST;DPYSL4;MSANTD1;GJA3;AKT2;STMN1;MPV17;IER5;ZFP286;HES6;STARD7;STARD8;COL23A1;CACNA2D2;FRS3;UPB1;DKK2;GTPBP3;ADCY9;ORAI3;ACOT2;ACOT1;ASTN2;UBA52;PLBD2;VPS28;RNF122;ANAPC16;MEAF6;TARSL2;CTBP1;ABCB4;PDGFB;AGAP3;TAPBPL;MRPL12;DEDD2;ANAPC11;XKRX;TRP53RKA;RHOT2;HSPH1;RIC8B;HLCS;1110051M20RIK;LDHD;RRS1;PIP5K1B;RREB1…
Up-regulated Genes In Striatum Of 10 Mon HD Q140 Mice Vs Q20 GSE78274	392/1814	1.99e-21	2.06e-20	0	0	1.83165	87.3063	PNMAL1;NEXMIF;SPINT2;DCAF5;DCAF4;PTPDC1;SAMD14;DPYSL4;NDST3;WDR91;LIPG;UNC13B;HES6;STARD7;SOX11;WDR73;ORAI2;SPIN2C;ACOT1;ATF3;SKAP2;LRPAP1;SAR1A;ABCB4;SLC30A10;DEDD2;HLCS;RDH11;1110051M20RIK;CFAP65;SLC19A1;EXPH5;ABCA1;GM10471;SETD1B;EIF2AK4;TMEM196;MEX3A;FAT1;PCDHB5;PAM;DMRTC1A;FANK1;TGFB1I1;LPCAT1;SNX11;TCTN3;SMPD1;TCTN2;TMSB4X;ENSA;TIMP2;TNKS1BP1;2610301B20RIK;GPRASP2;STUM;IFNGR2;TCF12;SLC39A11…
Genes Up-Regulated In Expression In SA01 Line NSCs Vs ESCs GSE34201	748/4033	4.8e-21	4.95e-20	0	0	1.56949	73.4287	CYFIP2;TRIR;TLNRD1;PNMAL1;RAPH1;1700001L19RIK;STMN4;ADARB1;DCAF5;SLC4A4;GLE1;NDST1;SAMD14;ZFYVE27;LSM11;DPYSL4;AI593442;AKT3;LIPG;STMN1;HOMER3;MPV17;IER5;ANKS1B;HES6;MBNL2;RBFOX2;COL23A1;FIBCD1;HPCAL1;SOX11;FRS3;RC3H2;DKK2;GPR162;ADCY9;DAAM2;HECW2;RFX4;MAP1A;ORAI2;SPIN2C;ASPHD2;RABL2;ATF6;ATF3;VPS28;RNF122;SLBP;NAA60;LRPAP1;MEAF6;TARSL2;CTBP1;ABCB4;PDGFB;LYPD1;ENDOD1;FIGNL2;AGAP3;C9ORF72;ANAPC11;…
Genes Up-Regulated In Human Asymptomatic HD BA9 Vs HD Caudate GSE129473	208/795	5.36e-21	5.49e-20	0	0	2.30082	107.393	CPNE9;TMEM200A;CPNE7;NUDT4;HS6ST3;LSM11;ADGRA1;STMN1;SCN1B;EPHA4;ATP6V1G2;9330159F19RIK;ARL15;COL23A1;HPCAL1;VWA5B2;FRS3;GPR162;THEG;TRIB3;SPTBN4;NECAB3;PPL;CRHR1;NKAIN2;STRIP1;SYNDIG1;INPP5J;KCNN1;TSPAN5;PIP5K1B;KCNN2;N4BP3;SCN3B;ZBTB7C;MYH7B;IQSEC3;RANBP17;POU6F2;GDF7;CPEB1;MYO5B;PLCH2;HRK;GPR26;TMEM151B;KCNC3;DIRAS1;GRIK1;SHD;ABCC12;PANX2;TUBA1B;CRTAC1;ENC1;TRIM3;TNFAIP8L1;NEFH;LYNX1;ELOVL6;WN…
Genes Up-Regulated In Expression In Huez2.3 Line NSCs Vs ESCs GSE34201	744/4010	5.88e-21	6.01e-20	0	0	1.56921	73.0984	CYFIP2;TRIR;TLNRD1;PNMAL1;STMN4;ADARB1;DCAF5;PTPDC1;GLE1;NDST1;SAMD14;DPYSL4;AKT3;LIPG;STMN1;HOMER3;MPV17;IER5;ANKS1B;HES6;MBNL2;RBFOX2;COL23A1;HPCAL1;SOX11;FRS3;DKK2;GPR162;ADCY9;RFX4;ORAI3;MAP1A;ORAI2;SPIN2C;ASPHD2;RABL2;ATF6;ATF3;VPS28;RNF122;SLBP;NAA60;LRPAP1;MEAF6;CTBP1;ABCB4;PDGFB;LYPD1;ENDOD1;NEDD4L;AGAP3;C9ORF72;ANAPC11;TRP53RKA;FAM171A1;ABR;FLRT2;HLCS;EPB41L1;FLRT3;1110051M20RIK;SYNDIG1;…
Genes Up-Regulated In Astrocytes Of HD Patients Vs Control PMID32681824	196/736	9.04e-21	9.2e-20	0	0	2.35242	108.571	SPARC;HS6ST3;RPS6KA2;DPYSL3;CHORDC1;CPNE2;PKNOX1;AGFG2;MBNL2;ACTN2;ARL15;ACTN1;FBXO2;HPCAL1;EBF4;MTURN;BCR;TIAM2;TIAM1;ADCY9;DAAM2;RFX4;MAP1A;MAML3;TLN2;ASTN2;ATF3;ANAPC16;CTBP2;NEDD4L;TMTC1;AGAP3;SLC30A10;ABR;HSPH1;EPB41L1;CHST15;SYNDIG1;MAP7;TNRC18;KCNN3;RAB11FIP3;EXPH5;ZBTB7C;CREBBP;NEBL;INSR;DCLK1;CPEB1;STAG1;PAM;RYR1;SRPX;HIP1;PTPRS;TENM4;GBE1;ARHGAP1;TCF20;SIPA1L3;PTPRF;LRRC1;SLC22A15;ENSA;…
Genes Up-Regulated In Expression In 22 Mon CHL2 HD Mice GSE10202	465/2267	1.13e-20	1.14e-19	0	0	1.72632	79.2893	TRIR;PID1;NEXMIF;RAPH1;SPINT2;DCAF5;ALKBH6;PTPDC1;ZDBF2;PCMT1;COMTD1;SAMD14;DPYSL3;ZFP286;HES6;9330159F19RIK;B630019K06RIK;SOX11;GPR162;ARMC6;ACOT2;ACOT1;VPS28;ATF4;SLBP;FLII;PDGFB;ENDOD1;WDR61;HIF1A;ANAPC11;PCDHA1;RDH11;1110051M20RIK;RRS1;CFAP69;SLC19A2;ABCA1;ACD;NDFIP1;H3F3B;SETD1B;EDEM1;NR2F1;PPP5C;FAT1;UNC119;ACHE;PHF2;ZFP367;PHF1;CLTB;LPCAT1;TUBA1B;SMPD1;TCTN2;ENSA;TRIM3;TIMP2;NEFL;GPR137;NE…
Genes Changed In Pons Of 28 Week Old WT Mice Vs Atxn 1 154Q/2Q Mice Both Treated With Vehicle GSE114674	657/3461	1.15e-20	1.16e-19	0	0	1.59881	73.4069	POP5;PID1;NEXMIF;XYLT2;WDR83;STMN4;ADARB1;DCAF5;ELK1;SLC4A4;GLE1;SAMD14;LSM11;DPYSL4;AI593442;AKT3;STMN1;ZFP286;ANKS1B;MEF2A;STARD4;MBNL2;PRKCB;HPCAL1;PHKA1;SOX11;GPR165;DAAM1;DAAM2;SPIN2C;ACOT2;ACOT1;FAR1;MAML3;PLBD2;ATF3;SF1;ATF4;LRPAP1;MTMR3;MEAF6;ABCB4;PDGFB;LYPD1;ENDOD1;TAPBPL;C9ORF72;FAM149A;DEDD2;RHOT2;FLRT2;EPB41L1;RDH11;ADAMTS19;D5ERTD579E;SYNDIG1;S100A13;PIP5K1A;GSG1L;SFN;RREB1;VPS16;VT…
Suz12 Bound Genes PMID16630818	383/1780	1.39e-20	1.4e-19	0	0	1.81762	83.1036	PNMT;SPON1;TLNRD1;CPNE7;OGFOD3;ICAM5;AQP5;ADARB2;SLC4A4;HS6ST2;HS6ST3;SOX3;AI593442;PPP4R4;4921524J17RIK;LIPG;HOMER3;SOX9;SAMD10;ANKS1B;EPHA4;LIMCH1;PRKCB;ISLR2;CSNK1D;EBF4;UPB1;DKK2;EML5;SFRP4;RBP4;RFX4;KCNQ3;KCTD12;MXRA7;ASTN2;ATF3;KCTD15;TRIM11;NGEF;CCNO;KCTD16;EPHA10;PCDH10;SLC35D3;ZFP503;LYPD1;PDGFB;TGFA;SLC30A10;ZBTB4;CRHR1;FAM149A;FLRT2;EPB41L1;PENK;SYNDIG1;CHST15;SARAF;PIP5K1B;KCNN2;TNRC1…
Genes Up-Regulated In R6/1 Poor Vs WT GSE135057	511/2550	1.41e-20	1.41e-19	0	0	1.68443	76.9896	PNMAL1;TMEM200A;NEXMIF;A430005L14RIK;RAPH1;1700001L19RIK;DCAF8;SPINT2;ACCS;DCAF5;PTPDC1;ZDBF2;COMTD1;SAMD14;PSMD5;DPYSL3;ZFP286;RNF138RT1;HES6;RBFOX2;STARD7;B630019K06RIK;FRS3;GPR165;ARMC6;SPIN2C;VPS28;SLBP;SAR1A;CTBP2;FLII;ENDOD1;WDR61;FAM149A;DEDD2;RDH11;1110051M20RIK;PIP5K1B;CFAP65;CREBBP;NDFIP1;CADM1;GTF2IRD2;POU6F2;EIF2AK4;TMEM196;CPEB1;PPP5C;ARL2BP;FAT1;NAPEPLD;PCDHB5;UNC119;DCHS1;PAM;PHF2;…
Genes Down-Regulated In HD Markers In Human Caudate Nucleus (HG-U133A) E-AFMX-6	107/310	1.64e-20	1.63e-19	0	0	3.36873	153.479	TLNRD1;CHRM1;TUSC3;NEXMIF;WIPF3;HS6ST2;CDH8;HS6ST3;SYNPR;DACH1;AI593442;PPP4R4;EPHA4;PRKCB;RALGAPA2;SYTL5;KCTD4;TMEM130;FOXP1;SUB1;CMPK2;ASPHD2;FAR2;MXRA7;NGEF;DGKI;JCAD;DGKH;SLC35D3;GPR85;NEDD4L;AGAP3;KLHL13;CACNA1E;STRIP2;ARHGAP20;GRIA3;PLXNA4;EGR1;OSBPL8;ARPP21;BCL11B;PCDH20;EPHX4;NETO2;TMEM196;DCLK1;GPR137C;ARHGAP32;NCEH1;SYNDIG1L;NBEA;CCDC88C;PPP1R1B;ONECUT2;AFF3;RERG;SYNE1;AKAP12;C1QTNF4;JP…
NP2 Neural Progenitor Cell-Enriched Genes PMID30078729	852/4741	3.13e-20	3.11e-19	0	0	1.52294	68.3967	PID1;NEXMIF;ALKBH6;ZDBF2;NDST1;SAMD14;ZFYVE27;LSM11;DPYSL4;PSMD5;AKT2;AKT3;DPYSL3;PWWP2A;PKNOX1;SAMD10;HES6;RBFOX2;STARD7;CACNA2D2;SCAMP1;RC3H2;BCR;EML4;FAR1;RABL2;ATF6;SF1;ATF4;SLBP;MTMR3;SAR1A;MEAF6;AGAP3;MRPL12;ADAMTS10;HSPH1;PRKAR2B;D5ERTD579E;1110051M20RIK;VTI1B;CREBBP;PRPF38B;CADM1;TIPARP;NCAPH2;NR2F1;PBX2;NETO2;L1CAM;GRIN2B;DCHS1;EZH2;ARHGAP1;SHD;SMPD3;JPH4;MED13;TMEM44;SMPD1;NEFL;NEFM;SH3…
Expression In Cerebrum Of 27 Wk R6/1 HD Mice GSE3621	151/517	3.14e-20	3.11e-19	0	0	2.6554	119.244	CPNE9;RAB3C;CPNE7;WIPF3;NPY2R;FAIM2;MSMO1;ZFP606;SLC4A4;CXCL14;CEP128;LAMP5;RGS4;CCND2;HABP4;CAR11;PPP1R16B;KCNH3;TLE2;SPINK8;PRKCB;STARD8;FIBCD1;KCTD1;SLC6A11;KCTD4;GPR165;PCP4;NPTXR;RIN1;NGEF;KCTD16;NECAB3;CABP7;HPCA;LYPD1;ITPR1;MRI1;AK4;GPR83;LTBP2;AK5;SMIM7;NDRG2;RASGRP2;CRHR1;KCNV1;STRIP2;GRK5;HRH3;LDHD;PENK;GSG1L;KCNN1;DRD1;DRD2;RREB1;GRIA3;NTSR2;ABCA1;MYH7B;PLK5;ARPP21;RASL10A;HTR1D;TMEM13…
Up-regulated Genes In Hippocampus Of 6 Mon HD Q175 Mice Vs Q20 GSE73503	486/2407	3.38e-20	3.34e-19	0	0	1.69489	75.9859	NEXMIF;FNBP1L;PTPDC1;ZDBF2;SAMD14;ZXDB;DPYSL3;STMN1;MEF2A;PRKCI;MBNL2;9330159F19RIK;STARD7;HPCAL1;SCAMP1;SYTL5;RC3H2;EML5;GPR165;FAR1;SKAP2;CTBP2;LYPD1;NYAP2;PRDM10;C9ORF72;HIF1A;PRKAR2B;EPB41L2;S100A13;EXPH5;ABCA1;CDK17;FZD1;GM10471;PRPF38B;CADM1;GPR12;NEBL;NR2F1;ELL2;PHC3;TMEM196;DAZL;PKIB;CYLD;RNF103;FAT1;CPEB2;GSDME;ZFP367;LYST;WDR44;TMEM47;FAM102B;MED13;UBL3;RSPO1;JAK2;ZFP365;GPRASP2;PCMTD1;…
Genes Down-Regulated In Chat-expressing Interneurons Of R6/2 Vs WT PMID32681824	166/592	3.86e-20	3.79e-19	0	0	2.51349	112.355	RAB3B;POP5;SERPINE2;GALNT16;DGKB;UXS1;FAM13A;PITPNA;RAPH1;FAIM2;MSMO1;CASC3;CXCL14;PTPDC1;CDH8;GLE1;ZFYVE28;DOCK10;SLK;BASP1;PPP4R4;AKT3;CAR11;LGALS8;RGS7;MEF2A;MCCC2;PRKCB;MAGI3;ACTN1;SLC6A15;CACNA2D2;EBF4;VWA5B2;CACNB3;OLFM2;PCP4;MAP1A;KCNQ3;ASTN2;PDE9A;SPTBN4;NEDD4L;GPR83;TMTC1;NYAP2;ADAMTS10;ACACA;ABR;FAM171A1;ARHGAP20;BRINP2;SNTG2;ATXN1;BRINP1;GRK5;SNTG1;ZMAT4;PENK;GSG1L;TSPAN5;CAMTA1;DRD2;G…
Mouse Indirect Pathway Spiny Projection Neuron Markers PMID30811995	194/735	4.24e-20	4.15e-19	0	0	2.32217	103.584	CPNE8;CCNK;TLNRD1;RPL31;HS6ST2;ZDBF2;DPF1;ARL6IP4;CPNE2;ATP6V1G2;MRTFA;FNDC9;DSG1C;TIAM1;RBP4;CARHSP1;SPATA13;ORAI2;MAML3;ANKK1;RIN1;ATF3;PIF1;BEX3;GRB7;BEX2;CHIA1;ZFP868;ZFP503;LYPD1;AGAP3;HIF1A;SEC14L3;STRIP2;NKAIN3;FLRT2;INPP5F;FLRT3;PENK;RRS1;SYNDIG1;KCNN2;SCN3B;RREB1;EGR1;ACD;GPR12;LRRN3;TMEM199;MYO5B;PCDHB6;SFXN3;SFXN4;ITGBL1;GASK1B;ZCCHC12;ACY1;PTPRF;CAMKV;NNT;CLDN23;SH3BGRL3;RSPO1;ARG2;AC…
Genes Down-Regulated In Htt-N171-82Q Vs Htt-N171-19Q Changed Genes In Rat Striatal Neurons GSE1918	88/234	7.42e-20	7.23e-19	0	0	3.83772	169.042	PATJ;WIPF3;STMN4;ADARB1;BZW2;PTPRF;RYR3;ETS2;NUDT4;NRGN;C1QTNF4;RGS4;SYNPR;CAMKV;CRTAC1;STMN1;ENC1;NEFL;PMEPA1;NEFM;NEFH;YWHAH;EPHA4;TLE2;KCND2;TRPC3;LIMCH1;PRKCB;DUSP1;KCND3;MMD;IGFBP3;ELMOD1;LMO7;ATP1B1;FOXP1;CACNB2;PCP4;RTN4RL1;NOS1AP;PELI1;TNIK;RAPGEF5;NGEF;GAS7;NECAB2;SLC24A3;MTFP1;GLS2;KCNA1;NTM;ITPR1;AKAP7;NEXN;CXXC5;RASD2;CKMT1;BRINP1;TMEM65;HRH3;EPB41L1;PENK;CHN1;PMVK;SYNDIG1;TSPAN5;DRD1…
Genes Down-Regulated In Pvalb/Th-expressing Interneurons Of R6/2 Vs WT PMID32681824	129/417	9.59e-20	9.3e-19	0	0	2.87213	125.774	DGKG;RAB3C;DGKD;PITPNA;SLC4A4;HS6ST3;PPP1CC;SYNPR;CNTNAP5B;TBC1D30;PPFIA4;MEF2A;PPP1R16B;KIRREL3;EPHA4;TLE2;PRKCB;LIMCH1;RALGAPA2;COL23A1;CACNA2D2;KCTD8;EML5;TIAM1;OLFM2;PCP4;SLC9A9;KCNQ3;ASTN2;PDE9A;KCTD16;CEMIP;CTTNBP2;PCDH15;PLD5;GPR83;ABR;FUT8;GRK3;ATXN1;SEC14L1;EPB41L1;FLRT3;CDH20;ZMAT4;PENK;CDH22;GSG1L;TSPAN5;CAMTA1;KCNN2;PLXNA4;RAI2;OSBPL8;ARPP21;ANKRD24;BCL11B;AUTS2;NEBL;IQSEC3;DCLK1;DLG2…
Genes Up-Regulated In Expression In SIVF018 Line NSCs Vs ESCs GSE34201	837/4660	9.93e-20	9.6e-19	0	0	1.51762	66.405	ZDBF2;SAMD14;ZFYVE27;LSM11;DPYSL4;PPP4R4;AKT3;NDST3;LIPG;MEF2A;HES6;RBFOX2;STARD8;HPCAL1;FRS3;RC3H2;RFX4;ORAI3;ORAI2;RABL2;PLBD2;ATF3;NGEF;ATF4;MTMR3;SAR1A;MEAF6;PDGFB;LYPD1;AGAP3;C7;HLCS;EPB41L1;D5ERTD579E;1110051M20RIK;PIP5K1B;JAG2;CREBBP;CADM1;TIPARP;NEBL;LRBA;EDEM1;NR2F1;NETO2;L1CAM;NAPEPLD;DCHS1;GSTM6;EZH2;PIGS;LIN54;ACHE;LRRC1;TMEM47;TUBA1B;MED13;SMPD1;NEFL;NEFM;2610301B20RIK;JAK2;PCMTD1;SL…
Cortex RNA M34 Module (Darkmagenta) PMID26900923	250/1041	1.18e-19	1.13e-18	0	0	2.06082	89.8215	CYFIP2;LPGAT1;ADARB1;ADARB2;ELK1;HS6ST3;NDST1;RPS6KA3;GOLGA4;OGFOD1;AKT3;DPYSL3;SLC12A6;BTRC;MEF2A;DYNC2H1;STARD4;LIMCH1;COG5;YOD1;ZFP618;SYTL5;MTURN;EML5;ADCY9;AKAP9;KCNQ3;MAML3;TLN2;KCTD16;MTMR3;TMTC1;IQGAP2;NYAP2;PRDM10;PCDHA1;VPS8;KCNN3;RREB1;RAB11FIP4;EXPH5;GM10471;CREBBP;NEBL;LRBA;INSR;EIF2AK4;L1CAM;HSPA12A;GRIN2B;PHC3;CYLD;WNK3;FAT1;CDS2;RYR1;TENM1;SETD2;GPR26;HIP1;TENM4;LPCAT1;TCF20;KRT20…
Genes Up-Regulated In Expression In 12 Wk R6/2 HD Mice (Set2) GSE9804	544/2781	1.31e-19	1.25e-18	0	0	1.63709	71.1818	PID1;NEXMIF;A430005L14RIK;RAPH1;1700001L19RIK;ADARB2;PTPDC1;GLE1;PCMT1;SAMD14;ZFYVE27;DPYSL4;DPYSL3;STMN1;UNC13B;HES6;9330159F19RIK;NHLRC3;STARD7;B630019K06RIK;SOX11;RC3H2;GPR162;RABL2;VPS28;SLBP;MTMR3;SAR1A;CTBP2;FLII;PRDM15;ENDOD1;WDR61;DEDD2;PCDHA1;RDH11;1110051M20RIK;RRS1;CFAP69;SLC19A2;ABCA1;CREBBP;ACD;NDFIP1;ARPP21;H3F3B;GTF2IRD2;EDEM1;NR2F1;EIF2AK4;CPEB1;PPP5C;ARL2BP;FAT1;CDK13;PHF2;ZFP367…
Genes Down-Regulated In HD Grade 4 Markers In Human Caudate Nucleus (HG-U133A) GSE3790	88/236	1.42e-19	1.36e-18	0	0	3.78542	164.282	PCSK2;SCARB1;CNTNAP1;RNF19B;ICAM5;SLC8A2;DBP;DPYSL4;CAMKV;TBC1D30;GPR137;ME3;LGALS8;PPP1R16B;ARHGEF11;PRMT8;RNF44;RBFOX2;ACTL6B;NPY5R;ACTN2;ACTN1;LMO7;ETV1;KCNAB2;CASD1;FOXP1;CACNB3;TUBB2A;SLC7A8;MAP1A;ARHGEF4;RARB;RBMS1;FAR2;CRELD1;CCNO;GAS7;NECAB2;BRSK2;RGS14;GLS2;RPE;TMEM59L;ITPR1;KATNB1;6430548M08RIK;RASGRP2;FAM149A;STRN4;FAM117A;RHOBTB2;SRM;ABR;MAPK9;GNG7;MGAT3;SUSD4;PTK2B;DRD1;SCN3B;DRD2;WA…
Striatum RNA M4 Module (Yellow) PMID26900923	212/838	1.62e-19	1.54e-18	0	0	2.19724	95.071	CPNE9;SPON1;PATJ;LPGAT1;CPNE7;PITPNA;RAPH1;XYLT2;DCAF8;ADARB1;ADARB2;NUDT4;SOX3;LSM11;ADGRA1;TUNAR;EPHB2;FBXO9;PAQR7;SLC6A11;MFSD12;MTURN;AFG3L2;FNDC4;DAAM1;HSBP1L1;MXRA7;ASTN2;PLBD2;KCTD15;NECAB3;FLII;6430548M08RIK;ZBTB4;FAM149A;ADAMTS19;LDHD;PIP5K1B;SNX9;SNX8;RAB11FIP5;GTF2IRD2;GREB1;NR2F1;PARP16;PARVA;HSPA12A;PKIB;PPP5C;CDAN1;KLHDC8A;NAPEPLD;SDC1;TMEM151B;KCNC3;DIRAS1;GBE1;GRIK1;SIPA1L2;SHD;ME…
Up-regulated Genes In Cerebellum Of HD Q175 Mice PMID26900923	273/1171	1.67e-19	1.58e-18	0	0	1.9875	85.9357	WDSUB1;NEXMIF;GPATCH8;HS6ST2;SYNPR;SCN11A;DPYSL3;NDST3;NIPAL3;TUNAR;IER5;FBXO9;PDK1;UNC13B;PRKCI;9330159F19RIK;SLC6A15;EBF4;SCAMP1;VWA5B2;EML4;TIAM2;SFRP4;FNDC4;ADGRB2;HECW2;FAR1;MAML3;LRPAP1;ADCYAP1R1;BEX2;MTMR3;CTBP2;PCDH10;CTBP1;PCDH15;NEDD4L;TAPBPL;IQGAP2;NYAP2;PPL;FAM149A;PRRC1;RACGAP1;FLRT3;OTOF;PPP1R26;SMIM10L2A;CREBBP;RABGAP1L;NDFIP1;ARPP21;GTF2IRD2;RANBP17;NR2F1;PARVA;L1CAM;SMARCA1;WDR54…
Expression In NSCs Lines HD180i.5 And HD60i.4 From HD Patients GSE37517	534/2724	1.99e-19	1.88e-18	0	0	1.63927	70.5914	CYFIP2;POP5;SERPINE2;TMEM200A;RAPH1;SCX;ADARB1;4921524J17RIK;DPYSL3;NDST3;LIPG;HES6;STARD4;RBFOX2;9330159F19RIK;STARD8;CACNA2D2;SOX11;SYTL5;DKK2;EML4;DAAM2;ORAI3;MAP1A;RBP1;ORAI2;FAR2;SKAP2;LYPD1;ENDOD1;FIGNL2;NEDD4L;IQGAP2;NYAP2;FAM149A;FLRT2;PRKAR2B;PIP5K1B;EXPH5;S100A10;FZD1;WNT10A;ARPP21;MTERF2;NR2F1;POU6F2;L1CAM;ELL2;GRIN2B;SLC6A6;DCHS1;PAM;CPEB2;GSTM6;GSDME;ACHE;LAD1;CDKN1A;PHF1;TGFB1I1;SHD…
CAG Length-Dependent Genes In dSPNs Of HD Mice Up PMID32681824	519/2631	2e-19	1.88e-18	0	0	1.64957	71.027	TRIR;NEXMIF;A430005L14RIK;WDR83;SPINT2;ACCS;ALKBH6;PTPDC1;GCSH;COMTD1;SAMD14;DPYSL4;DPYSL3;NDST3;LIPG;UNC13B;RNF138RT1;HES6;NHLRC3;STARD7;SOX11;GPR162;GPR165;DAAM1;DAAM2;ACOT2;SPIN2C;VPS28;SKAP2;ACOT3;CTBP2;FLII;ENDOD1;SLC30A10;DEDD2;FLRT2;ADAMTS19;RDH11;1110051M20RIK;CFAP69;PIP5K1B;CFAP65;SLC19A1;ZBTB7C;ABCA1;ACD;NDFIP1;EDEM1;EIF2AK4;TMEM196;MEX3A;ARL2BP;ADI1;FAT1;FNDC10;PCDHB5;PSMG4;FANK1;ACHE;…
Genes Down-Regulated In Genes Changed In STHdhQ7/Q7 Cells Upon Heat Shock GSE38001	873/4910	2.07e-19	1.94e-18	0	0	1.50304	64.6662	ACCS;PTPDC1;NDST1;COMTD1;ZFYVE27;LSM11;AKT2;DPYSL3;NDST3;ZFP286;STARD4;MRTFA;PHKA1;SCAMP1;BCR;EML4;EML5;FAR1;ATF6;PLBD2;NGEF;SKAP2;SF1;PIF1;MEAF6;TARSL2;FLII;AGAP3;IQGAP2;ADAMTS10;HLCS;EPB41L1;RDH11;EPB41L2;1110051M20RIK;PIP5K1A;ZBTB7C;ABCA1;CREBBP;CADM1;LRBA;L1CAM;UCK2;SFXN3;DCHS1;SFXN2;PRRT4;PIGS;LAD1;ARHGAP1;MED16;PANX2;NHSL2;MED13;TMEM44;SMPD1;NEFM;SH3BGRL3;PCMTD1;OFD1;3110082I17RIK;SLC39A11;…
Expression In Cerebellum Of 10 Wk N171-82Q HD Mice GSE44306	488/2445	3.07e-19	2.87e-18	0	0	1.66809	71.1059	POP5;PATJ;RPL31;TMEM200A;NEXMIF;WIPF3;SCX;FNBP1L;GPATCH8;SAMD14;MSANTD1;DPYSL3;RAVER2;WDR91;STMN1;IER5;SAMD10;ZFP286;UNC13B;HES6;UNC13A;FIBCD1;HPCAL1;SOX11;SCAMP1;ZC2HC1C;DAAM2;ORAI3;ATF3;NGEF;RNF122;LRPAP1;NYAP2;ADAMTS10;FAM149A;EPB41L1;HLCS;CFAP69;CHST15;GSG1L;PIP5K1B;EXPH5;PRPF38B;PLK5;JUP;GPR12;GTF2IRD2;NR2F1;NR1D1;NETO2;ELL2;SQLE;GJB3;PCDHB6;NAPEPLD;PCDHB5;UNC119;DCHS1;GALNTL6;PLCH2;EZH2;RSP…
Genes Up-Regulated In Expression In VUB05 Line NSCs Vs ESCs GSE34201	742/4055	3.11e-19	2.9e-18	0	0	1.53608	65.458	CYFIP2;TLNRD1;ADARB1;DCAF5;GLE1;SAMD14;ZFYVE27;LSM11;DPYSL4;PPP4R4;AKT3;LIPG;STMN1;HOMER3;MPV17;IER5;HES6;MBNL2;RBFOX2;DDX11;STARD8;COL23A1;HPCAL1;SOX11;FRS3;GPR162;ADCY9;DAAM2;HECW2;RFX4;ORAI3;MAP1A;ORAI2;SPIN2C;RABL2;ASTN2;ATF6;ATF3;VPS28;RNF122;ATF4;NAA60;LRPAP1;MTMR3;MEAF6;CTBP1;ABCB4;PDGFB;LYPD1;ENDOD1;FIGNL2;AGAP3;C9ORF72;TRP53RKA;FAM171A1;FLRT2;HLCS;EPB41L1;FLRT3;D5ERTD579E;1110051M20RIK;S…
Mouse Cerebellum Granule Cell Markers PMID19013282	588/3069	3.38e-19	3.13e-18	0	0	1.60114	68.1002	CYFIP2;PATJ;WIPF3;SCX;SPINT2;ELK1;SLC4A4;ZFYVE28;GLE1;SAMD14;ZFYVE27;DPYSL4;4921524J17RIK;STMN1;PKNOX1;MEF2A;MED1;STARD4;UNC13A;PRKCB;RC3H2;EML4;GPR162;ADCY9;HECW2;MAP1A;RNF122;SF1;NAA60;ZBTB8A;CTBP2;PRDM15;NEDD4L;AGAP3;PRDM10;HIF1A;DEDD2;ANAPC11;HLCS;EPB41L1;FLRT3;ZFP180;CHST15;PIP5K1A;PIP5K1B;ZBTB7A;ST3GAL2;VPS16;EXPH5;CDK17;CREBBP;PRPF38B;PLK5;JUP;ARPP21;CADM1;H3F3B;NCAPH2;PBX2;CDC7;NETO2;L1CA…
Genes Up-Regulated In Ciliated Ependymal Cells Of HD Patients Vs Control PMID32681824	327/1485	3.75e-19	3.46e-18	0	0	1.85687	78.7813	NEXMIF;WIPF2;PITPNA;ADARB1;ZDHHC1;DCAF5;NDST1;RPS6KA3;AKT2;RPS6KA2;AKT3;ARL6IP4;CPNE2;PKNOX1;AGFG2;ACTN1;FBXO2;HPCAL1;AP1B1;ADGRA3;CSNK1D;EBF4;BCR;TIAM2;TIAM1;ADCY9;CRISPLD1;RFX4;ORAI2;ANKK1;ASTN2;ANAPC16;CTBP2;CTBP1;FLII;ZBTB1;PRDM15;NEDD4L;AGAP3;SLC30A10;ZBTB4;PPL;FAM149A;PGS1;ABR;D5ERTD579E;ERI3;VPS8;CHST15;MAP7;DYM;PIP5K1B;SNX9;TNRC18;ZBTB7A;RAB11FIP3;ZBED5;RREB1;ST3GAL2;ZBTB7C;LHPP;ABCA1;CRE…
Genes Up-Regulated In Expression In Friedreich Ataxia And Normal iPSCs-derived Neurons Vs Fetal Human Tissues GSE65399	459/2270	3.78e-19	3.48e-18	0	0	1.69019	71.6974	CYFIP2;TRIR;PNMAL1;NEXMIF;STMN4;DCAF5;FNBP1L;GCSH;SAMD14;DPYSL4;AI593442;DPYSL3;LIPG;STMN1;IER5;ZFP286;ANKS1B;HES6;RBFOX2;CACNA2D2;SOX11;SCAMP1;FRS3;GPR162;DAAM1;MAP1A;ASPHD2;RABL2;UBA52;ATF3;ATF4;CTBP2;MEAF6;CTBP1;LYPD1;FIGNL2;NEDD4L;AGAP3;ANAPC11;PCDHA1;1110051M20RIK;D5ERTD579E;RRS1;VPS16;CREBBP;ACD;NDFIP1;NR2F1;NETO2;L1CAM;WDR54;GPR137C;PKIB;HNRNPM;SQLE;UCK2;MEX3A;PCDHB6;CPEB2;EZH2;GSDME;HRK;C…
Expression In Cortex Of 11 Mon BACHD-deltaN17 HD Mice GSE64386	523/2668	5.35e-19	4.9e-18	0	0	1.63604	68.832	TLNRD1;SERPINE2;XYLT2;EMC10;STMN4;ADARB1;FNBP1L;PTPDC1;RXFP3;NDST1;SAMD14;AI593442;AKT3;MPV17;MEF2A;STARD4;PRKCB;STARD8;FIBCD1;HPCAL1;GPR162;ADCY9;HECW2;RFX4;VPS28;NGEF;SKAP2;ANAPC16;LYPD1;ENDOD1;PRDM10;HIF1A;ABR;RIC8B;EPB41L1;LDHD;RREB1;VTI1B;SLC19A2;PRPF38B;WNT10A;ARPP21;PBX2;NR1D1;NR2F6;HNRNPM;SQLE;UCK2;PPP5C;RNF103;ARL2BP;ADI1;GPR180;GALNTL6;PLCH2;HRK;LIN54;PHF2;SRPX;GPR26;TGFB1I1;ARHGAP1;CLT…
Genes Changed In Mouse Brain Derived OPCs From P7 Vs E13.5 Mice PMID30078729	884/4999	5.46e-19	4.98e-18	0	0	1.49295	62.7823	NEXMIF;SCX;SPINT2;HTR4;ZFYVE28;ZDBF2;DPYSL4;PPP4R4;NDST3;LIPG;RBFOX2;STARD7;STARD8;SCAMP1;ASPHD2;FAR2;ATF3;NGEF;TARSL2;ABCB4;PDGFB;LYPD1;TAPBPL;EPB41L1;ADAMTS19;PRKAR2B;EPB41L2;CFAP65;AMZ1;EXPH5;ZBTB7C;MYH7B;JUP;CADM1;NEBL;NETO2;L1CAM;PKIB;DCHS1;PRRT4;GSTM6;EZH2;DMRTC1A;HRK;ACHE;SRPX;LAD1;KCNC3;BHLHE41;SHB;PANX2;HEY1;DLGAP2;NEFH;STUM;PCMTD1;KCND2;DUSP1;KCND3;METRN;ELOVL2;ELOVL6;BAZ1A;TEX15;WNT9A;…
Genes Down-Regulated In HD NPCs After ATF7IP Knock Down GSE118088	537/2758	6.71e-19	6.1e-18	0	0	1.6243	67.9706	CYFIP2;PATJ;TMEM200A;NEXMIF;1700001L19RIK;STMN4;SPINT2;SLC4A4;RXFP3;ZDBF2;ZFYVE28;SAMD15;AI593442;GJA3;SCN11A;AKT3;IER5;PRKCI;STARD4;MBNL2;UNC13A;FIBCD1;CACNA2D2;DKK2;RFX4;ORAI3;MAP1A;RBP1;FAM124A;FLRT2;C7;ADAMTS19;HLCS;PRKAR2B;1110051M20RIK;SYNDIG1;CFAP69;GSG1L;PIP5K1B;CFAP65;ABCA1;FZD1;PLK3;NDFIP1;CADM1;POU6F2;GRIN2B;GPR137C;FAT1;SFXN3;PCDHB6;PLCH2;CPEB2;DMRTC1A;GSDME;FANK1;CDKN1A;RSPH3A;SPEF1;…
Genes Changed In The Cortex Of zQ175 KI Mice Vs WT GSE123657	136/460	7.79e-19	7.06e-18	0	0	2.69295	112.286	SLC23A3;UBXN2B;DGKB;PCDH11X;HTR4;SLC4A4;2900026A02RIK;LAMP5;RGS4;PPP4R4;DPYSL3;NIPAL3;PIM1;SLC16A6;PTGFRN;LGALS8;UNC13B;PPP1R16B;STARD8;TPM2;SLC6A15;FNDC9;LEMD1;MTURN;SLC9A5;HECW2;ARMCX6;GPD1;RELL1;GEMIN7;NPTXR;ATF6;DGKI;JCAD;ZFP467;CABP7;MGST3;SLC35D3;ITPR1;GPR83;NDRG2;FAM171A1;TRP53I11;SNN;STRIP2;FAM124A;SEC14L1;FLRT2;CDH20;ZFP180;PENK;GSG1L;OTOF;DRD2;VTI1B;PLK5;ARPP21;NEBL;GFPT2;CCDC136;ERLIN1…
Genes Up-Regulated In Expression In SI-187 Line NSCs Vs ESCs GSE34201	678/3655	8.17e-19	7.38e-18	0	0	1.55081	64.5896	CYFIP2;TRIR;TLNRD1;STMN4;DCAF5;SLC4A4;GLE1;NDST1;SAMD14;LSM11;DPYSL4;NDST3;LIPG;STMN1;HOMER3;MPV17;PKNOX1;IER5;MEF2A;HES6;MBNL2;RBFOX2;STARD7;HPCAL1;SOX11;DKK2;GPR162;ADCY9;DAAM1;DAAM2;RFX4;MAP1A;RBP1;ORAI2;SPIN2C;RABL2;VPS28;NGEF;RNF122;SLBP;NAA60;LRPAP1;MEAF6;CTBP1;ABCB4;PDGFB;LYPD1;ENDOD1;AGAP3;C9ORF72;ANAPC11;TRP53RKA;FAM171A1;FLRT2;HLCS;EPB41L1;1110051M20RIK;SYNDIG1;S100A13;PIP5K1B;VPS16;FZD…
Cortex RNA M4 Module (Yellow) PMID26900923	108/330	1.01e-18	9.13e-18	0	0	3.1069	128.729	CPNE9;SLC23A3;DGKB;UXS1;1810020O05RIK;LAMP5;RGS4;RASSF3;BMPER;PPP4R4;RPS6KA2;FPGT;TBC1D30;HABP4;SLC16A6;PRKCB;ACTN1;TPM1;PLPP6;DMTF1;HECW2;RRAGD;SLCO2A1;ATF6;NGEF;ZBTB1;6430548M08RIK;LIN7A;SMIM7;ABR;KCNV1;FUT8;ATXN1;GSG1L;OTOF;TSPAN5;PIP5K1B;GRIA3;PLK5;ARPP21;ARHGEF39;DDIT4L;SLC4A11;PARVA;DGAT2L6;DCLK1;GPR137C;GNAO1;CALM1;DRC3;PCSK2;SNAP25;ABCD2;RASGRF2;PCSK9;BRK1;DUSP18;HAPLN4;MEDAG;TMEM47;HEY1;…
Genes Down-Regulated In The Cortex Of zQ175 KI Mice Vs WT GSE123657	101/299	1.12e-18	1e-17	0	0	3.25376	134.492	SLC23A3;UBXN2B;DGKB;HTR4;SLC4A4;LAMP5;RGS4;PPP4R4;PIM1;SLC16A6;PTGFRN;UNC13B;PPP1R16B;STARD8;FNDC9;LEMD1;SLC9A5;HECW2;GPD1;NPTXR;ATF6;DGKI;JCAD;CABP7;SLC35D3;ITPR1;GPR83;NDRG2;FAM171A1;TRP53I11;STRIP2;SEC14L1;FLRT2;ZFP180;PENK;GSG1L;OTOF;DRD2;VTI1B;PLK5;ARPP21;NEBL;GFPT2;ERLIN1;DDIT4L;HTR1B;SLC4A11;6330403K07RIK;DGAT2L6;DCLK1;RHEB;PPP1R1B;CALM1;RYR1;C2CD5;CDKN1A;GPR26;TENM4;SYCP2;AFF3;DMKN;SYNE1;…
Genes Up-Regulated In CAG Length-Dependent Genes In 10 Mon Mouse Striatum PMID26900923	521/2668	1.44e-18	1.29e-17	0	0	1.6266	66.8266	PNMT;TRIR;PID1;NEXMIF;A430005L14RIK;WDR83;SPINT2;DCAF5;PTPDC1;GCSH;GLE1;SAMD14;DPYSL4;NDST3;WDR91;LIPG;UNC13B;HES6;STARD7;B630019K06RIK;SOX11;WDR73;RC3H2;GPR162;ACOT1;ATF3;VPS28;RNF122;SKAP2;SLBP;SAR1A;CTBP1;ABCB4;TAPBPL;HIF1A;DEDD2;TRP53RKA;FLRT2;RDH11;RRS1;SLC19A1;EXPH5;ABCA1;PLK3;ACD;NDFIP1;EDEM1;POU6F2;ELL2;TMEM196;PPP5C;MEX3A;ADI1;FAT1;FNDC10;PCDHB5;FANK1;PHF2;LAD1;ZFP367;TGFB1I1;CLTB;SNX11;…
CA1 Pyramidal Neuron-Enriched Genes PMID25700174	124/406	1.59e-18	1.41e-17	0	0	2.81521	115.379	KCNG2;FAAH;GALNT16;PNMAL1;TMEM200A;WIPF3;GPR63;HTR4;ELK1;HS6ST3;PPP4R4;OGFOD1;NDST3;DPF1;EPHB2;AGFG2;LZTS3;UNC13B;LMO1;RBFOX2;EPHA6;SPINK8;ARL15;KRT2;MRTFA;LMO7;CYS1;CASD1;TRAIP;BCR;SLC9A2;PLPP6;FNDC4;GAREM1;STIM2;SUB1;ORAI2;PKP2;KCNQ3;ASPHD2;ACOT4;D630045J12RIK;ARHGEF28;LYPD1;NEDD4L;RASAL1;AGAP3;BHLHE22;CACNA1E;CHST15;PIP5K1A;PLXNA1;CCDC32;AMZ1;PCK2;CDK17;PRNP;MAGEE2;LRFN2;ARPC2;NBEA;STK26;CCDC8…
Up-regulated Genes In Control NPCs Vs HD NPCs GSE93767	413/2008	1.66e-18	1.47e-17	0	0	1.71678	70.2886	NEXMIF;RAPH1;DCAF5;LSM11;PPP4R4;LIPG;IER5;SAMD10;RBFOX2;IAH1;SOX11;WDR73;SCAMP1;ZC2HC1C;ADCY9;DAAM1;RFX4;ORAI2;ASPHD2;ZBTB8A;CTBP1;PNP2;FLII;LYPD1;IQGAP2;C9ORF72;FAM149A;ADAMTS19;1110051M20RIK;CHST15;LHPP;ABCA1;FZD1;PLK3;ARPP21;NEBL;GPR137C;DAZL;PKIB;GLUD1;CPEB1;GPR180;FAT1;DCHS1;PLCH2;PAM;RSPH3A;RSPH3B;SHD;LETM2;TMEM47;PANX2;DSTYK;PHF24;RSPO1;TESC;DENND2A;ELMOD1;TCF12;ELOVL6;FAM90A1B;ITPKB;SLC7A…
Down-regulated Genes In Cerebellum Of 10 Mon HD Q175 Mice Vs Q20 GSE73468	389/1870	2.87e-18	2.54e-17	0	0	1.73651	70.1391	PATJ;WIPF3;STMN4;ALKBH6;ELK1;SLC4A4;AI593442;MSANTD1;PPP4R4;RAVER2;STMN1;HOMER3;HES6;COL23A1;HPCAL1;CACNA2D2;ADCY9;DAAM2;RFX4;ORAI3;MAP1A;RBP1;FAR2;PLBD2;NGEF;PDGFB;ADAMTS10;ABR;EPB41L1;1110051M20RIK;LDHD;SYNDIG1;CFAP65;AMZ1;RREB1;LHPP;ZBTB7C;PLK5;NEBL;PBX2;NR1D1;GRIN2B;HNRNPM;SLC6A6;CPEB1;GPR180;GIPC2;SFXN4;GSTM6;PIGS;GPR26;KCNC3;SHB;ABCC12;MMP23;JPH4;TMEM47;TRIM9;ZCWPW1;ZFP385C;NEFM;XXYLT1;NEFH…
Down-regulated Genes In Human Neurodegenerative Prefrontal Cortex PMID29375298	438/2167	3.26e-18	2.88e-17	0	0	1.68305	67.7662	CYFIP2;PNMAL1;NEXMIF;HTR4;RXFP3;PCMT1;LSM11;SAMD15;AI593442;SCN11A;PPP4R4;ZXDB;AKT3;NDST3;STMN1;MEF2A;STARD4;RBFOX2;UNC13A;9330159F19RIK;NHLRC3;WSB2;PRKCB;SCAMP1;HECW2;FAR2;ASTN2;PLBD2;SKAP2;ZBTB8A;SAR1A;MEAF6;WDR61;NYAP2;C9ORF72;PCDHA1;HLCS;FLRT3;ZFP180;D5ERTD579E;CFAP69;NDFIP2;NDFIP1;ARPP21;GPR12;EDEM1;NETO2;GRIN2B;GPR137C;UCK2;ARL2BP;NAPEPLD;SFXN2;GALNTL6;MOCS3;RSPH3A;KCNC3;RSPH3B;ABCC12;WDR44…
Mouse Striatum Cholinergic Neuron Markers PMID19013282	562/2940	4.61e-18	4.05e-17	0	0	1.58886	63.4259	POP5;SERPINE2;TMEM200A;WDR83;ACCS;DCAF5;ALKBH6;GCSH;PCMT1;COMTD1;SAMD14;ZFYVE27;LSM11;AKT3;STMN1;MPV17;SAMD10;UNC13B;HES6;IAH1;WSB2;HPCAL1;CACNA2D2;B630019K06RIK;FRS3;GPR162;SPIN2C;RABL2;UBA52;PLBD2;ATF4;SAR1A;CTBP2;MEAF6;CTBP1;FLII;ENDOD1;TAPBPL;MRPL12;C9ORF72;FAM149A;DEDD2;ANAPC11;PCDHA1;FLRT2;RDH11;CFAP69;GSG1L;PIP5K1B;S100A10;JAG2;PLK3;NDFIP1;NEBL;NCAPH2;EDEM1;TMEM196;TMEM199;PKIB;SQLE;CPEB1;…
Genes Down-Regulated In Cerebellum Of 29 Week Old fxSCA7 92Q Mice Vs WT GSE139090	98/291	4.64e-18	4.06e-17	0	0	3.23622	129.167	CPNE9;CEP126;LPGAT1;TLNRD1;KCNG4;GPR63;RNF19B;RORA;CNTNAP5B;FAM174B;PPP4R4;HOMER3;SCN1B;ANKS1B;PPP1R16B;WSB2;PPTC7;HPCAL1;CACNA2D2;PLPP6;PCP4;FAR2;KCTD12;NPTXR;PDE9A;DGKH;CABP7;CTTNBP2;ITPR1;AK4;SLC1A6;CRHR1;CACNA1G;RHOBTB2;STRIP2;ARHGAP20;RDH11;SYNDIG1;IGFBP6;RREB1;GRIA3;LHPP;PLK5;EGR4;AUTS2;PCDH20;HTR1B;NSG1;GNAO1;DLG2;FGF11;TUBA8;RYR1;DPP10;SNAP25;TMEM151B;KCNC3;GRIK1;DOC2B;ABCC12;TRIM9;ARMH4;…
HD Grade 3 Markers In Human Caudate Nucleus (HG-U133B) GSE3790	326/1503	4.67e-18	4.07e-17	0	0	1.81841	72.5657	CPNE8;LPGAT1;TLNRD1;NEXMIF;WIPF3;RAPH1;PTPDC1;HS6ST2;IKZF5;HS6ST3;SYNPR;CNST;AI593442;MSANTD1;PPP4R4;OGFOD1;HABP4;ANKS1B;HES6;EPHA4;MED1;UNC13A;STARD7;PRKCB;SLC6A15;ISLR2;ACSL5;YOD1;SYTL5;MTURN;BCR;TIAM2;GAREM1;SNORC;CRISPLD1;DAAM1;RFX4;ORAI2;ASPHD2;FAR1;FAR2;MXRA7;CCDC82;NGEF;KCTD15;SKAP2;SPTBN4;ADCYAP1R1;ANAPC16;INTU;PCDH10;TMEM63C;SLC35D3;ZFP503;NEDD4L;TMTC1;AGAP3;OMA1;C9ORF72;STRIP2;RIC8B;PRR…
Genes Down-Regulated In Pvalb/Th-expressing Interneurons Of HD Patients Vs Control PMID32681824	348/1633	5.25e-18	4.56e-17	0	0	1.78205	70.905	LPGAT1;RPL31;NEXMIF;OGFOD3;RAPH1;DCAF5;SLC4A4;GPATCH8;CYB5D2;SYNPR;GOLGA4;RAVER2;PWWP2A;KIFAP3;DYNC2H1;MEF2A;ACVR1;UNC13B;EPHA4;STARD4;RBFOX2;NHLRC3;ACTN1;CMC2;CIRBP;EML5;GAREM1;SUB1;MAP1A;AKAP9;XRN2;FAR1;MAML3;CCDC82;NECAB2;BEX3;BEX2;INTU;MAGED1;PCDH15;HNRNPLL;CRHR1;OSGEP;RHOT2;NKAIN3;SEC14L1;DHX32;RIC8B;HLCS;XRRA1;SARAF;DPH6;N4BP2;SCN3A;ZBTB7C;SLC19A2;ABCA1;B3GALNT2;CDK17;NDFIP1;ARPP21;ZFP638;S…
Genes Changed In Human HD Astrocytes Vs Control Astrocytes PMID32070434	412/2015	5.34e-18	4.63e-17	0	0	1.70249	67.7099	TRIR;PID1;SERPINE2;RPL31;WIPF2;XYLT2;DCAF8;SPINT2;ACCS;ADARB2;SLC4A4;NDST1;PCMT1;PSMD5;AKT2;PPP4R4;STMN1;PWWP2A;HOMER3;SAMD10;HES6;STARD4;MBNL2;COL23A1;HPCAL1;PHKA1;BCR;EML4;DAAM1;ACOT2;ACOT1;ACOT5;VPS28;ATF4;ACOT3;LRPAP1;SAR1A;ANAPC16;MEAF6;WDR61;C9ORF72;ADAMTS10;ANAPC11;ABR;RHOT2;HSPH1;FLRT2;EPB41L2;LDHD;CHST15;PIP5K1A;LHPP;MYH7B;CADM1;GTF2IRD2;NCAPH2;EDEM1;LRBA;PBX2;WDR54;SQLE;GLUD1;RNF103;SFX…
Genes Up-Regulated In Astrocytes Of HdhQ170 Vs HdhQ20 PMID32681824	145/514	5.52e-18	4.77e-17	0	0	2.52293	100.254	CYFIP2;DGKG;RAB3C;RAB3A;NEXMIF;FAIM2;ETS2;ZDBF2;LAMP5;PPP1CB;DOCK10;SAMD15;DPYSL4;BASP1;FRRS1L;AKT3;SACS;TUNAR;FAM3C;SLC12A6;MEF2A;MLIP;RBFOX2;AGTPBP1;ATP6V1G2;SLC6A15;ZBTB37;CIRBP;NPY1R;CASK;YOD1;SHISA7;OLFM3;NCL;LY6H;DGKI;DDX5;INSIG1;TMEM59L;LIN7A;6430548M08RIK;AK5;NYAP2;KLC1;ARHGAP21;HSPH1;PRKAR2B;SNTG1;UBC;CHST15;CAMTA1;SCN3B;TAC1;SKIL;SMIM10L2A;TCAF1;ANKRD34C;POU6F2;KLHL23;HSPA12A;SMARCA1;GR…
Genes Down-Regulated In HdhQ111 Striatal Cells Vs HdhQ7 GSE98739	685/3731	6.55e-18	5.64e-17	0	0	1.52902	60.498	CYFIP2;PID1;SERPINE2;TMEM200A;NEXMIF;RAPH1;SPINT2;ADARB1;SLC4A4;RXFP3;ZFYVE28;DPYSL4;MSANTD1;AI593442;GJA3;PPP4R4;RAVER2;DPYSL3;NDST3;LIPG;SAMD10;ZFP286;ANKS1B;UNC13B;STARD4;UNC13A;DDX11;FIBCD1;HPCAL1;SOX11;DKK2;EML4;EML5;GPR162;DAAM1;HECW2;SPIN2C;ACOT2;ACOT1;ASPHD2;MAML3;ATF6;ACOT5;ATF3;NGEF;ATF4;PDGFB;ENDOD1;WDR61;IQGAP2;MRPL12;FAM171A1;RHOT2;RDH11;FLRT3;EPB41L2;ZFP180;SYNDIG1;RRS1;SLC19A1;ZBTB…
Mouse Striatum Drd2 Medium Spiny Neuron Markers PMID19013282	164/613	9.55e-18	8.18e-17	0	0	2.35098	92.1356	DGKG;RIPOR2;TLNRD1;ATP8A1;PCDH11X;RNF19B;PPP2R2A;ZBTB22;JADE2;RPS6KA4;AKT2;DPF1;DZIP1L;STK32A;KIFAP3;AGFG2;PPP1R16B;MED1;UNC13A;FST;TBC1D2B;CYS1;UPB1;BCR;EML4;TIAM2;KCTD8;CACNB2;TBC1D20;ORAI2;RIN1;SKAP2;DGKH;KMT2E;ZBTB8A;CTTNBP2;ITPR1;6430548M08RIK;RASGRP2;ACTR3B;FOXO1;RAP1GAP;GMCL1;RHOBTB2;SNN;HRH3;CHST15;SYNDIG1;PIP5K1A;SNX9;TNRC18;DRD2;RAB11FIP3;ST3GAL2;RAB11FIP4;MAP2K6;TBC1D16;JAG2;TCAF1;RASL…
Genes Up-Regulated In Pvalb/Th-expressing Interneurons Of HD Patients Vs Control PMID32681824	175/671	1.15e-17	9.85e-17	0	0	2.27418	88.6974	DGKG;RAB3B;RAB3C;PID1;ATP8A1;GALNT16;WIPF3;ZBTB20;RORA;FAIM2;UBE2Z;HS6ST2;HS6ST3;IGF1R;SESN3;AKT2;NDST3;PPFIA3;LZTS3;PPP1R16B;MBNL2;LIMCH1;CACNA2D2;SHISA9;TMEM130;FOXP1;COL4A2;SLC9A9;DGKI;KCTD16;SHC3;EPB41;PCDH10;NTM;ARHGAP18;TMTC1;AGAP3;SLC30A10;NDRG2;ZBTB4;PHF21A;ACACA;NKAIN2;ABR;FAM171A1;GRK3;HSPH1;ATXN1;FLRT2;GRK5;MAN2A1;EPB41L2;ZMAT4;ERI3;CASKIN1;TSPAN5;KCNN2;TNRC18;BRINP3;PLXNA4;PRNP;RABGAP…
Genes Down-Regulated In HD Vs Normal NPCs GSE118088	465/2348	1.22e-17	1.04e-16	0	0	1.64338	64.0006	PID1;WIPF3;STMN4;ADARB2;DCAF4;GLDN;SAMD14;DPYSL4;SCN11A;DPYSL3;NDST3;HOMER3;ZFP286;ANKS1B;UNC13B;HES6;RBFOX2;9330159F19RIK;SOX11;SYTL5;HECW2;ACOT2;SPIN2C;ACOT1;ASPHD2;ASTN2;ACOT5;ATF3;RNF122;SKAP2;ACOT3;FIGNL2;NEDD4L;IQGAP2;NYAP2;SLC30A10;TERT;FLRT3;SFN;ZBTB7C;JAG2;ABCA1;WNT10A;JUP;NR1D1;L1CAM;ELL2;TMEM196;DAZL;PKIB;CPEB1;GJB3;GALNTL6;PLCH2;ACHE;LAD1;SRPX;SMPD3;TMEM47;PANX2;TRIM9;TMEM44;TMSB4X;NE…
Mouse Direct Pathway Spiny Projection Neuron Markers PMID30811995	133/462	2.2e-17	1.87e-16	0	0	2.58981	99.3311	CEP126;RAB3C;UBXN2B;TUSC3;PPP2R2A;FGF3;PPP1CB;RGS4;SYNPR;CNST;DACH1;PPP4R4;SACS;STK32A;ANKS1B;MBNL2;DGAT2;AKR1E1;PPTC7;PRKCB;ARL15;ACTN1;TPM1;KRT9;TIAM2;SELENOM;SLC9A5;MORF4L2;SUB1;RBP1;AKAP9;RRAGD;GPD1;ROR1;ATF6;DGKI;JCAD;DGKH;PFKFB3;CCDC149;HPCA;ITPR1;PLD5;NEDD4L;KLHL13;IQGAP2;ACTR3B;ATXN1;SEC14L1;DRD1;CLSPN;SCN3A;CDK17;OSBPL8;NDFIP2;TCAF1;BCL11B;FANCB;SMARCA1;SYT9;GRIN2B;CYLD;STK26;CYP2S1;UST;…
Genes Up-Regulated In Striatum Of R6/2 Vs WT Mice GSE109416	429/2138	2.96e-17	2.51e-16	0	0	1.66349	63.3077	TRIR;PID1;PNMAL1;TMEM200A;NEXMIF;RAPH1;1700001L19RIK;PTPDC1;GLE1;SAMD14;PSMD5;DPYSL3;NDST3;STMN1;UNC13B;9330159F19RIK;NHLRC3;STARD7;B630019K06RIK;WDR73;GPR165;DAAM1;ACOT2;RABL2;VPS28;ATF4;SLBP;SAR1A;FLII;PRDM15;ENDOD1;HIF1A;FAM149A;ANAPC11;FLRT2;PCDHA1;CFAP69;ABCA1;CREBBP;ACD;NDFIP1;NCAPH2;NR2F1;POU6F2;TMEM196;CPEB1;FAT1;FNDC10;NAPEPLD;UNC119;DCHS1;PHF2;ZFP367;PHF1;CLTA;SNX11;LETM2;C77080;PANX2;T…
Differentially Expressed Genes In Striatum Of 2 Mon HD Q175 Mice Vs Q20 PMID26900923	44/83	3.44e-17	2.9e-16	0	0	7.11179	269.602	ANKRD35;RGS14;TMPRSS6;SBSN;FGF3;RGS4;SEC14L3;DBP;GPR153;SOHLH1;PPP4R4;ABI3BP;PENK;CLSPN;ENPP5;WNT4;KCNH4;PLK5;ARPP21;RASL10A;GPX6;KLHL1;DDIT4L;SLC4A11;NETO2;FNDC9;DGAT2L6;UPB1;KRT9;TRAIP;POMC;THEG;MAS1;CACNB3;RBP4;TMEM114;ADORA2A;TNNT2;GPD1;GIPC2;1700001O22RIK;SCN4B;IFI27L2B;SKAP2
Genes Down-Regulated In Expression In Cortex Of 7 Mon BACHD-deltaN17 HD Mice GSE64386	72/187	3.82e-17	3.21e-16	0	0	3.96993	150.076	SLC23A3;POP5;TENM4;PITPNA;FAIM2;MSMO1;DMKN;PPP1R9A;CXCL14;HAPLN4;NRGN;RGS4;DBP;PRADC1;SDF4;CAR11;RGS7;STARD4;LYNX1;PAQR7;NPY5R;FST;STARD8;SARS;GPCPD1;DOK3;CCKBR;NOS1AP;CDH12;MXRA7;1700016K19RIK;SCN4B;CSNK1G2;NGEF;MTPN;ARHGEF25;TMEM121B;GPR83;GDPD5;RHOBTB2;CAMKK2;TMEM25;STRIP2;BRINP1;ACVR1C;GPR153;LDHD;OTOF;GABRD;DRD4;ZBTB18;TSNAX;LINGO1;SEMA4A;SMAD3;ARPP21;RASL10A;KCNJ9;PLEKHA2;KCNIP3;ECEL1;DDIT4…
Genes Down-Regulated In Human Symptomatic HD BA9 Vs Control GSE129473	442/2223	4.66e-17	3.9e-16	0	0	1.64612	61.9009	CYFIP2;TLNRD1;DCAF8;HTR4;ALKBH6;GPATCH8;GLDN;ZFYVE28;NDST1;ZFYVE27;SCN11A;WDR91;MPV17;ZFP286;RBFOX2;UNC13A;FIBCD1;CACNA2D2;FRS3;GTPBP3;DAAM2;MAP1A;RABL2;ASTN2;PLBD2;SF1;ENDOD1;FIGNL2;NYAP2;TERT;EPB41L1;HLCS;SYNDIG1;AMZ1;MYH7B;NDFIP1;DNAH17;L1CAM;UCK2;CPEB1;SFXN2;PIGS;KCNC3;KDM8;ARHGAP1;SMPD3;TRIM9;TUBA1B;ZFP385C;TRIM3;NEFL;PHF24;NEFM;NEFH;GPRASP2;STUM;WDR37;TESC;SLC39A10;WDR31;ELOVL6;WNT9A;FAHD2A…
Genes Changed In Sst/Npy-expressing Interneurons Of R6/2 Vs WT PMID32681824	151/556	4.71e-17	3.93e-16	0	0	2.39414	90.0045	RIPOR2;CCNT2;DGKB;TUSC3;WWC1;PCDH11X;RAPH1;ZBTB20;RORA;GPATCH8;DOCK10;RPS6KA3;DACH1;RIMS3;CNTNAP5B;RASSF3;BASP1;STMN1;CHORDC1;TBC1D30;KIRREL3;EPHA4;EPHA6;DGAT1;COG5;MAGI3;RALGAPA2;LMTK3;SHISA9;FOXP1;OLFM2;RAB30;PCP4;RALGAPB;AKAP9;SIK3;SRSF7;SPTBN4;EPHA10;NTM;ANKRD12;ITPR1;PCDH15;ARHGAP18;NYAP2;PHF21A;RAP1GAP;NKAIN2;ABR;SNTG2;ATXN1;FLRT2;CDH20;MAN2A1;SNTG1;OTOF;CAMTA1;TNRC18;SRGAP1;BRINP3;CREBBP;R…
Genes Up-Regulated In Expression In VUB01 Line NSCs Vs ESCs GSE34201	721/3997	5.1e-17	4.24e-16	0	0	1.49798	56.1957	CYFIP2;TLNRD1;PNMAL1;EMC10;STMN4;ADARB1;DCAF5;SLC4A4;PTPDC1;GLE1;NDST1;SAMD14;LSM11;DPYSL4;ZXDB;AKT3;NDST3;LIPG;STMN1;PWWP2A;HOMER3;MPV17;IER5;ANKS1B;MEF2A;HES6;MBNL2;RBFOX2;9330159F19RIK;NHLRC3;COL23A1;SOX11;FRS3;RC3H2;DKK2;BCR;GPR162;ADCY9;DAAM1;DAAM2;HECW2;RFX4;MAP1A;ORAI2;SPIN2C;RABL2;ATF6;VPS28;RNF122;SLBP;LRPAP1;MTMR3;MEAF6;CTBP1;PDGFB;LYPD1;ENDOD1;FIGNL2;AGAP3;C9ORF72;TRP53RKA;FAM171A1;ABR…
Genes Down-Regulated In Human HD Astrocytes Vs Control Astrocytes PMID32070434	312/1447	6.49e-17	5.38e-16	0	0	1.79914	67.0597	SPON1;PID1;CMAS;SERPINE2;RPL31;WIPF2;OGFOD3;XYLT2;DCAF8;SPINT2;ACCS;ZDHHC1;SLC4A4;GBA2;NDST1;PCMT1;PSMD5;AKT2;PPP4R4;STMN1;DAG1;HOMER3;KIF21B;SAMD10;TBC1D10A;FBXO9;ARL10;DYNC2H1;STARD4;ATP6V1G2;COL23A1;CIRBP;AP1B1;PHKA1;ADGRA3;SLC6A11;BCR;EML4;ADGRB2;DAAM1;ADGRB1;ACOT2;ACOT1;ACOT5;KCTD15;VPS28;ACOT3;LRPAP1;BEX3;ADCYAP1R1;BEX2;NECAB3;MEAF6;INTU;MAGED1;FBF1;SDC3;WDR61;SMIM7;ADAMTS10;OSGEP;SEC14L2;A…
Genes Down-Regulated In Expression In HD180i.5 NSCs From HD Patient Vs NSCs From Healthy Controls GSE37517	391/1917	6.84e-17	5.65e-16	0	0	1.69055	62.9249	CYFIP2;PNMAL1;NEXMIF;WIPF3;STMN4;SLC4A4;GCSH;PPP4R4;LIPG;STMN1;SAMD10;UNC13B;RNF138RT1;UNC13A;PRKCB;DDX11;CACNA2D2;PHKA1;SOX11;SCAMP1;BCR;RFX4;ASPHD2;MAML3;ATF3;NGEF;RNF122;PNP2;ABCB4;NEDD4L;C9ORF72;FAM124A;EXPH5;S100A10;SLC19A2;B3GALNT2;CADM1;CDC7;NETO2;GRIN2B;WDR54;SQLE;GLUD1;SLC6A6;UCK2;DMRTC1A;EZH2;GSDME;BSPH1;CDKN1A;SMPD3;TMEM47;C77080;TRIM9;ZFP385C;NEFL;NEFM;JARID2;KCND2;DUSP1;ELOVL2;SLC39A…
Genes Down-Regulated In Sst/Npy-expressing Interneurons Of zQ175DN Vs WT PMID32681824	118/396	8.66e-17	7.13e-16	0	0	2.71203	100.304	CYFIP2;RAB3C;RIPOR2;NEXMIF;WIPF3;PITPNA;PCDH11X;DCAF5;GPATCH8;PPP1CB;RPS6KA3;PPP4R4;AKT3;SCMH1;BTRC;KIFAP3;HMGN1;MEF2A;EPHA4;LMTK3;VWA5B2;ATP1B1;BCR;CACNB3;PCP4;GAREM1;AKAP9;XRN2;PHIP;TNIK;DENND6A;LY6H;CDKL1;EPHA10;SLC1A1;ABHD6;AK5;BRINP2;FLRT2;GRK5;EPB41L1;PENK;OTOF;DRD1;SCN3A;KLHDC10;EEFSEC;NDFIP2;ZFP236;GGT7;CADM1;SIAH3;LRBA;UQCC1;GNAO1;GLUD1;TBCK;RHEB;GKAP1;DPP10;SNAP25;ZFP644;TENM1;GSK3B;RBM…
Genes Up-Regulated In Cerebellum Of 18 Week Old Atxn 1 154Q/2Q Mice Treated With ASO Vs Vehicle GSE114674	115/384	1.43e-16	1.17e-15	0	0	2.72988	99.6008	CPNE9;CYFIP2;DGKG;CPNE8;LPGAT1;TLNRD1;IRS1;FAIM2;RORA;MTFR1L;AGFG2;CHRNB2;ATP6V1G2;WSB2;PPTC7;IGFBP3;USP3;CACNA2D2;LMO7;MFSD12;RNF41;CACNB2;RRAGD;ORAI2;PKP2;ASTN2;NPTXR;ATF4;FCOR;DIPK1B;ZFP346;CTTNBP2;TMEM59L;ABHD6;RASGRP2;ARHGAP20;BAG5;MAN2A2;FLRT3;ZMAT3;SYNDIG1;DYM;IGFBP6;RREB1;SRGAP1;RAB11FIP4;GRIA3;LHPP;SYT2;AUTS2;PTCH1;HTR1B;HSPA12A;GNAO1;ARHGAP32;EFNA3;LRCH1;GRB2;CNTN3;CALM1;EIF4G1;PIGS;RYR…
Genes Up-Regulated In Chat-expressing Interneurons Of R6/2 Vs WT PMID32681824	148/549	1.96e-16	1.6e-15	0	0	2.36784	85.6454	RAB3C;FAAH;PID1;GALNT13;ATP8A1;TMEM200A;RORA;ADARB2;GPATCH8;HS6ST3;IGF1R;CNTNAP5B;NDST3;NARS2;GRB10;DAG1;SLC16A7;BTRC;ANKS1B;UNC13B;TLE4;EPHA4;SEMA6A;EPHA6;LIMCH1;KCNH8;THOC2;RPGRIP1L;ATP1B1;KCTD8;CACNB2;ADCY9;OLFM3;RALGAPB;SIK3;PHIP;TNIK;DGKI;VCL;KCTD16;SHC3;CTTNBP2;PCDH15;LIN7A;KLHL13;KLC1;PHF21A;STK3;NKAIN2;SYNDIG1;SRGAP1;BRINP3;MARK2;CREBBP;CRADD;ZFP638;POU6F2;CRIM1;SMARCA1;DCLK1;ZWINT;GULP1;…
Cortex RNA M14 Module (Cyan) PMID26900923	205/853	2.7e-16	2.2e-15	0	0	2.04424	73.2799	CCNK;WIPF2;RAPH1;DCAF5;FNBP1L;GPATCH8;ZDBF2;LSM11;CNST;ADGRA1;RAVER2;CHORDC1;DPF1;PTGFRN;PKNOX1;IER5;ACVR1;RBFOX2;9330159F19RIK;CSNK1D;SOX11;BCR;EML4;MEAF6;EPHA10;PDGFB;PRDM15;NEDD4L;ZBTB4;SEC14L2;FAM171A1;CHTF8;ZFP180;D5ERTD579E;PIP5K1A;EGR1;PLK3;BCL11B;TIPARP;SETD1B;PDE2A;SRPK1;UCK2;SFXN3;CDK13;CDKN1A;AHCTF1;C2CD3;SIPA1L2;MMP23;SMPD3;TRIM9;MED13;TNKS1BP1;JAK2;JARID2;NEFH;ATMIN;NCOA3;ELOVL6;BAZ1…
Striatum RNA M20 Module (Royalblue) PMID26900923	202/838	3.25e-16	2.64e-15	0	0	2.05142	73.1621	OXTR;WDSUB1;SPINT2;PTPDC1;SAMD14;DPYSL4;PDK1;UNC13B;HES6;SLC6A15;KRT1;ISLR2;CSNK1D;SOX11;DSG1C;TRIM17;ZFP7;CAGE1;ACOT4;SKAP2;INTU;PCDH10;MAGED1;ABCB4;TAPBPL;SLC30A10;PRRC1;RACGAP1;FLRT2;PCK2;SMIM10L2A;LRRN3;MAGEE2;PCDH20;RANBP17;POU6F2;ZWINT;MEX3A;PCDHB5;FANK1;CETN2;TGFB1I1;SLC35F5;PTPRO;KRT20;LETM2;SLC22A15;AIFM2;TCTN3;SMPD1;TCTN2;TIMP2;2610301B20RIK;GPRASP2;CC2D2A;STUM;LRRIQ1;ZFP811;WDR31;CYP7B…
Autistic Brain Down-Regulated Interneuron Gene Module PMID21614001	125/438	4.29e-16	3.48e-15	0	0	2.55313	90.3409	CHRM1;CLSTN1;OGDHL;ADARB1;DCAF4;AI593442;FAM174B;BTRC;KIFAP3;LGALS8;SCN1B;RGS7;MLIP;UNC13A;ADPRHL1;SLC6A15;VPS33B;CACNA2D2;LMO7;TMEM130;RNF41;DHDDS;GPR162;RELL2;NGEF;RTN2;NECAB3;ARL3;TMEM59L;ITPR1;6430548M08RIK;KLC1;PPL;EPB41L1;FLRT3;D5ERTD579E;CDH22;SYNDIG1;INPP5J;CAMTA1;IGFBP6;RAB11FIP5;KLHDC3;NDFIP1;HPS6;NSG1;HSPA12A;WDR54;REEP1;LRFN2;LRFN5;CALY;CAPRIN2;PI4KA;RETREG2;GRSF1;PAM;SUGP1;DPP10;ACHE…
Genes Changed In OPCs Of HD Patients Vs Control PMID32681824	194/797	4.55e-16	3.67e-15	0	0	2.07567	73.3269	SPON1;LPGAT1;SERPINE2;AKT3;DPYSL3;CHORDC1;ANKS1B;MBNL2;PRKCB;CMC2;CIRBP;BCR;EML4;TIAM2;TIAM1;RFX4;MAP1A;SIK3;ASTN2;KCTD16;BEX3;SPTBN4;BEX2;SLC30A10;ABR;HSPH1;FLRT2;SARAF;TSPAN5;GSG1L;AMZ1;ABCA1;CREBBP;CADM1;CRADD;ARPP21;INSR;RANBP17;NAPEPLD;CALM1;ITM2C;PTPRS;HIP1;TENM4;GRIK1;SIPA1L3;RYR3;LRRC1;TUBA1B;TMSB4X;ENSA;REV3L;KCND2;TSC22D1;STRBP;TCF12;SLC39A11;ANO6;DYNLL1;ANO4;MRPS6;ENAH;TUBB2A;KCNMA1;TA…
Htt-N171-82Q Vs Htt-N171-19Q Changed Genes In Rat Striatal Neurons GSE1918	97/306	6.27e-16	5.05e-15	0	0	2.95409	103.408	PATJ;WIPF3;STMN4;UBE2L6;ADARB1;BZW2;ETS2;NUDT4;RGS4;SYNPR;STMN1;EPHA4;TLE2;LIMCH1;PRKCB;IGFBP3;LMO7;CMBL;ATP1B1;FOXP1;CACNB2;PCP4;RBP1;TNIK;NGEF;NECAB2;NTM;ITPR1;STK3;BRINP1;HRH3;EPB41L1;PENK;PMVK;SYNDIG1;TSPAN5;DRD1;GRIA3;S100A10;ARPP21;PLK2;PDE2A;DCLK1;PTPRD;PLCXD3;MYO5B;PPP1R1B;PTPRF;RYR3;NRGN;C1QTNF4;CAMKV;CRTAC1;ENC1;NEFL;PMEPA1;NEFM;NEFH;YWHAH;KCND2;TRPC3;DUSP1;KCND3;MMD;ELMOD1;RTN4RL1;NOS1…
Genes Changed In The Astrocytes Of R6/2 Mice Vs WT At 1 Month Old GSE124846	209/883	7.69e-16	6.17e-15	0	0	2.00372	69.733	SPARC;NEXMIF;RAPH1;STMN4;NUDT4;ZDBF2;ZFYVE28;AI593442;OGFOD1;NDST3;CCNL1;IER5;SCN1B;ANKS1B;UNC13B;RBFOX2;EPHA6;ACTN2;PRKCB;ACTN1;FIBCD1;ZFP976;PHKA1;SLC6A11;RC3H2;DSG1C;KRT9;ACOT1;MXRA7;RIN1;SLC35D3;NYAP2;SEC14L2;ADAMTS19;D5ERTD579E;PENK;INPP5J;KCNN1;GSG1L;1500009C09RIK;N4BP3;SCN3B;SCN3A;RAB11FIP4;EXPH5;PLK5;GPR12;LRRN3;ARPP21;BCL11B;ZFP638;INSR;RANBP17;NETO2;SQLE;UCK2;PPP1R1B;KYAT3;ZFP871;HRK;RY…
Expression In Cortex Of 7 Mon BACHD-deltaN17 HD Mice GSE64386	91/280	8.97e-16	7.17e-15	0	0	3.06136	106.07	SLC23A3;POP5;RBM28;TENM4;ONECUT2;PITPNA;PTPRO;MAST1;CIB2;PSIP1;FAIM2;MSMO1;DMKN;PPP1R9A;CXCL14;HAPLN4;NRGN;RGS4;SAMD14;DBP;PRADC1;SDF4;WDR6;CAR11;GGACT;RGS7;STARD4;LYNX1;PAQR7;NPY5R;STARD8;FST;SARS;GPCPD1;DOK3;CCKBR;NOS1AP;CDH12;MXRA7;HAP1;1700016K19RIK;SCN4B;NGEF;CSNK1G2;SKAP2;MTPN;BEX2;ARHGEF25;TMEM121B;GPR83;GDPD5;CAMKK2;RHOBTB2;TMEM25;STRIP2;GPR153;BRINP1;ACVR1C;GNG4;LDHD;OTOF;NCDN;GABRD;DRD4…
Genes Down-Regulated In HD Vs Normal GPCs GSE105041	371/1827	1e-15	8e-15	0	0	1.67462	57.8337	SLC46A3;SPON1;FAAH;PID1;SERPINE2;PPAN;SCX;1700001L19RIK;ACCS;DCAF4;CYB5D2;ZFYVE28;ADGRA1;PPP4R4;NDST3;SAMD10;ATP6V1G2;EPHA6;UNC13A;SLC6A15;COL23A1;CACNA2D2;SLC6A11;VWA5B2;SYTL5;ADGRB2;DAAM2;HECW2;ADGRB1;KCNQ3;ACOT2;SPIN2C;ACOT1;ASTN2;ACOT5;NGEF;SKAP2;ACOT3;NECAB2;BEX3;SPTBN5;BEX2;TMEM161A;TMEM63C;MAGED1;PCDH10;ZFP503;PCDH15;TGFA;TMTC1;MRPL12;PPL;CRHR1;ADAMTS19;EPB41L1;EPB41L2;SYNDIG1;CHST15;KCNN2…
Expression In Quadriceps Muscle Of 16 Wk Mbnl1 KO Myotonic Dystrophy Mice GSE39911	321/1528	1.02e-15	8.11e-15	0	0	1.7392	60.0324	SLC23A3;SLC46A3;OXTR;SERPINE2;HDAC11;RAPH1;PPP2R2A;DCAF5;CYB5D2;RPS6KA3;COMTD1;AI593442;AKT2;WDR91;CPNE2;SOX9;LGALS8;KIFAP3;SCN1B;MEF2A;ACVR1;PAQR7;IAH1;ACTN2;CMC2;CACNA2D2;B630019K06RIK;CMBL;TIAM2;TIAM1;NEIL2;SUB1;MAP1A;KCNQ3;RABL2;MAML3;ASTN2;NGEF;ZFP503;6430548M08RIK;ZBTB4;PKHD1;PRRC1;RACGAP1;PCBP4;STC2;1110051M20RIK;PENK;INPP5J;SARAF;TSPAN5;PIP5K1B;KCNN2;KCNN3;SLC19A1;ST3GAL2;EXPH5;RAB11FIP5;…
Up-regulated Genes In Cerebellum Of 10 Mon HD Q175 Mice Vs Q20 GSE73468	384/1906	1.02e-15	8.11e-15	0	0	1.66019	57.3016	SPON1;WDSUB1;NEXMIF;PPP2R2A;ZFP606;DCAF5;GPATCH8;IKZF5;RPS6KA3;SYNPR;SAMD14;SCN11A;NIPAL3;TUNAR;LGALS8;CCNL1;IER5;FBXO9;PDK1;PRKCI;9330159F19RIK;ARL15;STARD7;SLC6A15;CSNK1D;EBF4;TMEM170B;SCAMP1;VWA5B2;RC3H2;MTURN;TIAM2;EML4;SFRP4;ADGRB2;SUB1;CSNK2B;XRN2;VDAC2;FAR1;MAML3;CCDC82;UBA52;ATF4;SLBP;LRPAP1;BEX3;ADCYAP1R1;BEX2;SAR1A;CTBP2;CTBP1;MAGED1;PCDH10;NEDD4L;TAPBPL;IQGAP2;NYAP2;PPL;C9ORF72;FAM149A…
Genes Down-Regulated In Expression In The Heart Of Mice Inducibly Expressing Celf1 For 72 H GSE56185	284/1311	1.03e-15	8.15e-15	0	0	1.80153	62.1665	SLC46A3;SLC46A1;CMAS;WDR83;SPINT2;MTFR1L;SLC4A4;NUDT4;GLE1;NDST1;ZFYVE27;DPYSL4;ADGRA1;RPS6KA2;RAVER2;NIPAL3;DAG1;MPV17;AGFG2;PDK1;MCCC2;EPHA4;IL15RA;PAQR7;IAH1;STARD7;ACTN2;LIMCH1;STARD8;ENTPD5;ADCY9;ADGRB2;DAAM2;ACOT2;SIK3;ACOT1;CAGE1;TLN2;ATF6;RNF122;ZBTB8A;IGSF3;INTU;MGST3;TMTC1;IQGAP2;LIAS;OSGEP;DGUOK;RHOT2;STRIP2;5730409E04RIK;STC2;DPH3;VPS8;AI413582;DYM;KCNN1;PIP5K1B;KCNN2;TSPAN3;SLC19A1;S…
Genes Changed In R6/1 Poor Vs R6/1 Good GSE135057	71/193	1.05e-15	8.27e-15	0	0	3.6873	127.171	CDKN1A;PLXND1;ONECUT2;RPL31;TMEM200A;RASGRF2;RAPH1;HAPLN4;SHD;LAMP5;ARHGDIB;COTL1;CEP170B;KCNH4;ELMOD1;TBC1D8;B630019K06RIK;FOXP1;SLC22A23;OLFM2;PCP4;ADORA2A;RRAGD;CANX;RARB;LY6H;SCN4B;PLPPR1;SLC24A3;CTTNBP2;SDC3;DCAF12L1;TGFA;KCNA4;NEXN;NRXN2;RASGRP2;CACNA1G;PCSK1N;GLRA3;ABLIM2;PPP1R7;GNG7;PENK;STX6;SLIT1;PLXNA1;RGS20;DRD1;PAK3;DRD2;TAC1;GABRD;RXRG;ARPP21;SMIM10L1;IQSEC3;FAM199X;KRT10;TMEM196;MG…
Expression In Forebrain Of 11 Wk SCA1 Spinocerebellar Ataxia 1 Mice GSE2867	113/386	1.59e-15	1.25e-14	0	0	2.64049	89.9782	CYFIP2;RAB3C;LPGAT1;PLXND1;ADARB1;METRNL;COMT;SLC4A4;CXCL14;LAMP5;RGS4;CCND2;GM3558;CCL27A;SACS;IER5;MED1;EPHA4;PRKCB;IGFBP4;STARD8;FST;CIRBP;KCTD1;ACSL4;THOC2;BCR;PCP4;ADCY9;FRMD6;RBP1;GPD1;FAR1;NPTXR;RIN1;NGEF;DDX6;ARHGEF25;ITPR1;ABHD6;GPR83;PCSK1N;SEC14L1;HRH3;TSPAN5;IGFBP6;RREB1;GRIA3;MARK2;SMAD3;ARPP21;RASL10A;AUTS2;TMEM132A;CRIM1;DDIT4L;FBXO32;DCLK1;NET1;TFCP2;PPP1R1B;KDM5A;TENM1;CDKN1A;RAS…
Genes Changed In Cyproheptadine Treated STHdhQ111 Vs Control GSE129143	747/4226	1.7e-15	1.33e-14	0	0	1.45867	49.6109	PATJ;WIPF2;A430005L14RIK;SCX;DCAF8;EMC10;FNBP1L;DCAF5;ELK1;SLC4A4;DCAF4;PTPDC1;GPATCH8;GLE1;NDST1;PCMT1;COMTD1;SAMD14;ZFYVE27;AKT2;AKT3;LIPG;STMN1;PRKCI;STARD4;RBFOX2;NHLRC3;COL23A1;MRTFA;BCR;EML4;GPR162;DAAM1;MAP1A;ORAI2;ACOT2;FAR1;MAML3;ATF6;ATF3;RNF122;SF1;ATF4;PIF1;ZBTB8A;MTMR3;SAR1A;CTBP2;FLII;C9ORF72;TRP53RKA;FLRT2;HLCS;EPB41L1;RDH11;EPB41L2;D5ERTD579E;RRS1;CFAP69;CHST15;S100A13;AMZ1;ST3GAL…
Top OPC-enriched Genes In Humans And Mice PMID29892006	236/1041	1.84e-15	1.43e-14	0	0	1.8994	64.4483	SPON1;PID1;SERPINE2;PNMAL1;STMN4;ADARB2;PTPDC1;SOX3;SAMD14;PPP4R4;DPYSL3;ANKS1B;KRT2;KRT1;SOX11;CMBL;EBF4;RFX4;RRAGD;ASTN2;NECAB2;BEX2;PCDH10;TMEM63C;ABCB4;SDC3;LYPD1;PCDH15;TGFA;HSPH1;RACGAP1;FLRT2;PRKAR2B;FLRT3;CHST15;GSG1L;TSPAN3;SCN3A;PPP1R26;LRRN3;PCDH20;CDC7;NETO2;SMARCA1;TMEM196;GPR137C;SQLE;CALY;WNK3;FAT1;PCDHB5;LAD1;TENM1;HIP1;GRIK1;SHD;PTPRF;CRTAC1;REV3L;ZFP365;KCND2;KCND3;DENND2A;ELOVL…
HD Markers In Human Caudate Nucleus (HG-U133A) E-AFMX-6	134/493	2.67e-15	2.08e-14	0	0	2.3879	80.128	TLNRD1;CHRM1;TUSC3;NEXMIF;WIPF3;CDH8;HS6ST2;HS6ST3;SYNPR;DACH1;AI593442;PPP4R4;COTL1;EPHA4;COL27A1;PRKCB;RALGAPA2;LIFR;SYTL5;KCTD4;TMEM130;FOXP1;FRMD6;GAREM1;DAAM1;CRISPLD1;RFX4;SUB1;CMPK2;ASPHD2;RELL1;FAR2;MXRA7;SQSTM1;NGEF;DGKI;KCTD15;JCAD;DGKH;SLC35D3;GPR85;NEDD4L;ARHGAP18;AGAP3;OMA1;KLHL13;CACNA1E;STRIP2;ARHGAP20;MAN2A1;MAP3K20;GRIA3;PLXNA4;OSBPL8;EGR1;ARPP21;BCL11B;NEBL;PCDH20;EPHX4;SMAD9;NE…
Genes Up-Regulated In Friedreich Ataxia iPSCs Expression Vs SC41-MSC Cell Line GSE22651	749/4248	2.81e-15	2.18e-14	0	0	1.45354	48.7002	PID1;SERPINE2;TMEM200A;XYLT2;RAPH1;ADARB1;ACCS;DCAF5;SLC4A4;PTPDC1;NDST1;SAMD14;AI593442;PSMD5;ZXDB;AKT3;WDR91;HOMER3;MPV17;IER5;MEF2A;MBNL2;RBFOX2;IAH1;FIBCD1;HPCAL1;MRTFA;SCAMP1;FRS3;RC3H2;ADCY9;DAAM1;DAAM2;HECW2;ORAI3;MAP1A;ACOT2;ACOT1;ATF6;ACOT5;PLBD2;VPS28;SKAP2;ACOT3;LRPAP1;MTMR3;MEAF6;TARSL2;FLII;LYPD1;ENDOD1;AGAP3;TAPBPL;HIF1A;TRP53RKA;FAM171A1;ABR;FLRT2;HLCS;CHST15;S100A13;VPS16;S100A10;…
Htt-N171-82Q Changed Genes In Rat Striatal Neurons GSE1918	132/484	3.25e-15	2.51e-14	0	0	2.39821	80.0022	RAB3B;PATJ;SPARC;WIPF3;RAPH1;STMN4;ADARB1;BZW2;GPATCH8;ETS2;NUDT4;RGS4;LAPTM4B;SYNPR;BASP1;STMN1;EPHA4;TLE2;PRKCB;ACTN2;LIMCH1;MAGI3;LMO7;ATP1B1;FOXP1;BCR;CACNB2;PCP4;OLFM3;RBP1;TCTA;TNIK;NGEF;KMT2E;NECAB2;DDX6;INSIG1;NTM;SLC1A1;ITPR1;KLHL13;STK3;BRINP1;HRH3;PRKAR2B;DDRGK1;PMVK;PENK;CDH22;S100A13;SYNDIG1;TSPAN5;DRD1;SCN3B;SCN3A;GRIA3;S100A10;EGR1;ARPP21;PLK2;PDE2A;6330403K07RIK;DCLK1;PTPRD;GNAO1;…
Genes Down-Regulated In Cyproheptadine Treated STHdhQ111 Vs Control GSE129143	430/2204	3.69e-15	2.84e-14	0	0	1.60023	53.1804	PATJ;WIPF2;SCX;DCAF8;DCAF5;FNBP1L;DCAF4;PTPDC1;GPATCH8;NDST1;SAMD14;AKT2;AKT3;STMN1;PRKCI;RBFOX2;COL23A1;MRTFA;BCR;EML4;GPR162;MAP1A;ORAI2;MAML3;RNF122;PIF1;ZBTB8A;MTMR3;CTBP2;FLII;FLRT2;EPB41L1;HLCS;EPB41L2;D5ERTD579E;CFAP69;CHST15;S100A13;ST3GAL2;ZBTB7C;S100A10;FZD1;CREBBP;SETD1B;PBX2;PHC3;GLUD1;MEX3A;SFXN3;UNC119;PHF2;SETD2;TGFB1I1;ARHGAP1;MED16;LETM2;NHSL2;TUBA1B;DSTYK;FAM102B;MED13;TMEM44;TC…
Genes Up-Regulated In Friedreich Ataxia iPSCs Expression Vs Pel Stem Cell Line GSE22651	763/4348	4.27e-15	3.28e-14	0	0	1.44615	47.8501	PID1;SERPINE2;TMEM200A;RAPH1;ADARB1;ACCS;DCAF5;SLC4A4;DCAF4;NDST1;SAMD14;ZFYVE27;LSM11;DPYSL4;AI593442;AKT3;LIPG;HOMER3;MPV17;IER5;MEF2A;MBNL2;RBFOX2;HPCAL1;MRTFA;RC3H2;DKK2;ADCY9;DAAM2;HECW2;ORAI3;MAP1A;ORAI2;SPIN2C;ACOT2;ACOT1;ASPHD2;FAR2;RABL2;ATF6;ACOT5;PLBD2;VPS28;ACOT3;LRPAP1;TARSL2;CTBP1;FLII;LYPD1;ENDOD1;AGAP3;HIF1A;TRP53RKA;FAM171A1;ABR;FLRT2;HLCS;1110051M20RIK;CHST15;S100A13;VPS16;S100A…
Genes Down-Regulated In Expression In Forebrain Of 11 Wk SCA1 Spinocerebellar Ataxia 1 Mice GSE2867	99/324	4.55e-15	3.47e-14	0	0	2.80006	92.4706	CYFIP2;RAB3C;LPGAT1;PLXND1;ADARB1;COMT;METRNL;SLC4A4;CXCL14;LAMP5;RGS4;CCND2;CCL27A;SACS;IER5;EPHA4;MED1;PRKCB;IGFBP4;STARD8;FST;KCTD1;THOC2;BCR;PCP4;ADCY9;FRMD6;RBP1;GPD1;FAR1;RIN1;NPTXR;NGEF;DDX6;ARHGEF25;ITPR1;ABHD6;GPR83;SEC14L1;HRH3;TSPAN5;IGFBP6;RREB1;GRIA3;SMAD3;ARPP21;AUTS2;RASL10A;TMEM132A;CRIM1;DDIT4L;FBXO32;DCLK1;NET1;PPP1R1B;KDM5A;TENM1;CDKN1A;RASGRF2;SYNE1;TMEM47;SPRED1;DBP;PRADC1;EN…
Genes Down-Regulated In HD Markers In Human Prefrontal Cortex GSE64810	266/1221	4.55e-15	3.47e-14	0	0	1.80953	59.7564	FAAH;CPNE7;OGFOD3;PPAN;DCAF8;ZFYVE28;RPS6KA4;NDST1;ZFYVE27;ADGRA1;SCN11A;WDR91;NIPAL3;HABP4;MPV17;EPHB2;SAMD10;FBXO9;PAQR7;ACTN2;AP1B1;CACNA2D2;CSNK1D;WDR73;FRS3;MFSD12;GTPBP3;FNDC4;SNORC;ADGRB2;ADGRB1;MAP1A;SIK3;RABL2;TLN2;ASTN2;ATP6V0D1;SF1;IGSF8;NECAB3;TMEM63C;FBF1;SDC3;OSGEP;NKAIN2;HLCS;PCBP4;SYNDIG1;AI413582;RAB11FIP3;SNX8;LHPP;TMEM86B;NCAPH2;IQSEC3;RANBP17;SLC35E3;UCK2;CPEB1;CALY;ZFP512B;CA…
Genes Changed In Cerebellum Of N171-82Q Mice GSE107613	97/315	4.99e-15	3.79e-14	0	0	2.83063	93.2189	GALNT16;PCDH11X;HR;JADE2;TMEM141;ETS2;SLC8A2;SYNPR;TMEM266;TLE2;PAQR7;MAMSTR;SFRP4;TIAM1;DAAM2;ROR1;CHIL5;RNF122;GRB7;ZFP467;6430548M08RIK;AK4;LTBP2;ADAMTS10;CRHR1;STRIP2;GRK3;GRK5;HLCS;PCBP4;PENK;CHST15;INPP5J;CAMTA1;PIP5K1B;SCN3B;BRINP3;PLXNA4;EXPH5;PRNP;PLK5;JUP;ODF2;PDE2A;TMEM132A;PARVA;HSPA12A;SDK1;DIAPH2;PLCXD3;SYNDIG1L;MUS81;CNTNAP1;HAPLN4;GRM2;ARMH4;ADAMTS3;HEY1;MUC15;KLF10;ANKDD1A;TRPC6;…
The Global Proteome Data Of The Insoluble Fraction From The Brains Of Q175 And WT Mice PMID31138642	380/1901	5.14e-15	3.9e-14	0	0	1.64133	54.0028	CYFIP2;FAAH;SERPINE2;RPL31;HDAC11;PITPNA;PPP2R2A;ICAM5;MTFR1L;SLC4A4;PCMT1;RPS16;DPYSL4;PSMD5;DPYSL3;STMN1;TBC1D10A;ANKS1B;EPHA4;ATP6V1G2;UNC13A;ACTN2;LIMCH1;PRKCB;ACTN1;FBXO2;CIRBP;AP1B1;HPCAL1;CACNA2D2;CSNK1D;SLC6A11;SCAMP1;BCR;AFG3L2;ADGRB2;DAAM2;ADGRB1;CSNK2B;MAP1A;SIK3;VDAC2;KCTD12;TLN2;ATP6V0D1;UBA52;NGEF;KCTD16;IGSF8;EPB41;CTBP1;FLII;MGST3;ENDOD1;NEDD4L;6430548M08RIK;AGAP3;MRPL12;ACTR3B;AB…
Influence Of Hsp90 Inhibitor On Expression In WT Mice GSE29681	615/3382	5.31e-15	4.02e-14	0	0	1.49089	49.0031	PATJ;RPL31;WIPF3;A430005L14RIK;STMN4;FNBP1L;SLC4A4;GPATCH8;PCMT1;DPYSL3;NDST3;PWWP2A;MPV17;PKNOX1;IER5;ANKS1B;MED1;PRKCI;STARD4;MBNL2;UNC13A;WSB2;NHLRC3;PRKCB;STARD8;COL23A1;MRTFA;PHKA1;SOX11;RC3H2;GTPBP3;ZC2HC1C;EML5;ADCY9;ARMC6;RFX4;ORAI3;ATF6;ATF3;RNF122;SF1;ATF4;SLBP;ENDOD1;NEDD4L;WDR61;HIF1A;DEDD2;HSPH1;FLRT2;EPB41L1;D5ERTD579E;LDHD;RRS1;RREB1;S100A10;SLC19A2;B3GALNT2;CDK17;CREBBP;PRPF38B;ND…
Genes Down-Regulated In R6/1 Poor Vs R6/1 Good GSE135057	40/79	7.32e-15	5.52e-14	0	0	6.45579	210.126	PLPPR1;ONECUT2;PLXND1;RPL31;CTTNBP2;KCNA4;NEXN;TGFA;RASGRP2;LAMP5;ABLIM2;GNG7;PPP1R7;ARHGDIB;PENK;STX6;RGS20;DRD1;DRD2;TAC1;GABRD;RXRG;KCNH4;ARPP21;ELMOD1;TBC1D8;KRT10;FOXP1;SLC22A23;PCP4;CD4;PDE10A;SYNDIG1L;ADORA2A;STK26;RRAGD;PPP1R1B;RARB;SCN4B;YPEL2
Cortex RNA M5 Module (Green) PMID26900923	249/1128	7.71e-15	5.79e-14	0	0	1.83647	59.6788	FAAH;RPL31;PPAN;XYLT2;SCX;EMC10;ICAM5;ZDHHC1;ALKBH6;RPS6KA4;COMTD1;SAMD14;ZFYVE27;RPS16;DPYSL4;ARL6IP4;FBXO2;BOLA1;EBF4;VWA5B2;FRS3;GTPBP3;ADGRB2;ARMC6;ADGRB1;ASPHD2;UBA52;PLBD2;TRIM11;SF1;IGSF8;TMEM161A;CTBP1;FBF1;SDC3;AGAP3;MRPL12;ADAMTS10;PGS1;PCBP4;KCNN1;TNRC18;ZBTB7A;RAB11FIP3;SNX8;RAB11FIP5;JAG2;MYH7B;NR1D1;NR2F6;CCDC88B;HNRNPM;CALY;PTK7;PLCH2;ACHE;PHF2;PTPRS;RSPH3A;GPAA1;DIRAS1;GRIK5;PHF1;…
Genes Up-Regulated In Chat-expressing Interneurons Of zQ175DN Vs WT PMID32681824	149/578	9.42e-15	7.06e-14	0	0	2.22539	71.8705	RAB3B;CPNE8;RIPOR2;ATP8A1;GALNT16;WWC1;EMC10;RORA;PPP2R2A;ADARB1;ADARB2;DCAF5;CDH8;HS6ST2;HS6ST3;IGF1R;GLE1;PPP1CC;SESN3;OSBP;KIF21B;EPHB2;RGS7;DYNC2H1;MBNL2;SLC6A15;LIPO3;HPCAL1;AP1B1;CASK;TMEM130;ACAP2;OLFM2;RAB30;KCNQ3;MAML3;ASTN2;ATF6;PDE9A;DGKH;KCTD16;ZFP346;D630045J12RIK;NTM;PCDH15;PLD5;CACNA1E;NKAIN2;ABR;PRRC1;BRINP1;EPB41L1;ZMAT4;1110051M20RIK;ERI3;VPS8;DYM;CAMTA1;TNRC18;ZBTB7C;MAP2K6;KLH…
Differentially Expressed Genes In Cerebellum Of 10 Mon HD Q140 Mice Vs Q20 GSE78270	270/1252	1.01e-14	7.54e-14	0	0	1.78612	57.5606	POP5;SPON1;OXTR;SPARC;NEXMIF;EMC10;ALKBH6;NUBP1;HS6ST2;SYNPR;MSANTD1;STMN1;TUNAR;HES6;PAQR7;UNC13A;FBXO2;SLC6A15;PHKA1;TMEM170B;FRS3;SFRP4;GPR162;ADGRB2;DAAM2;SPATA13;SIK3;RABL2;MXRA7;MAML3;GRB7;NAA60;ADCYAP1R1;PCDH10;FBF1;PCDH15;ENDOD1;IQGAP2;NYAP2;HIF1A;PPL;ADAMTS10;CRHR1;MBTD1;PCBP4;FLRT3;INPP5J;MAP7;KCNN2;1500009C09RIK;NTSR2;ABCA1;RABGAP1L;TMEM86B;PLK5;PLK2;SUCO;PARVA;EIF2AK4;RNF103;ZFAT;FAT1…
Genes Down-Regulated In dSPNs Of HdhQ111 Vs HdhQ20 PMID32681824	38/73	1.07e-14	7.97e-14	0	0	6.83051	219.732	CYFIP2;GSK3B;HLF;CELF1;MTCL1;DUSP18;AGAP3;SIPA1L3;RHOBTB2;JPH4;RGS4;SEC14L1;EPB41L1;CHN1;CKB;SLC25A23;SOCS7;GIT1;ANKS1B;PPP1R16B;ZBTB18;EGR1;LYNX1;DMTN;ARPP21;PRKCB;KCTD1;FBXL16;BCR;GNAO1;PDP1;CACNB3;PDE10A;SLMAP;MAP1A;PPP1R1B;CALM1;SCN4B
Genes Changed In Cerebellum Of 6 Wk ATXN2Q127 Mice E-MTAB-6293	124/451	1.19e-14	8.86e-14	0	0	2.42135	77.6289	CEP126;RIPOR2;TLNRD1;COL16A1;RAPH1;GPR63;RNF19B;RORA;RGS4;SOX3;DACH1;CNTNAP5B;BASP1;FAM174B;PPP4R4;ARHGDIB;HOMER3;SOX9;ANKS1B;PPP1R16B;ACVR1;HPCAL1;CACNA2D2;ZBTB34;KRT77;CACNB2;PLPP6;SFRP4;PCP4;MAP1A;FAR2;KCTD12;MXRA7;ASTN2;NPTXR;ACOT5;ATF3;PDE9A;DGKH;CABP7;CTTNBP2;ITPR1;TMTC1;SLC1A6;PMF1;RHOBTB2;CACNA1G;XKRX;STRIP2;ARHGAP20;ADAMTS19;ZMAT3;LONRF1;SRGAP1;GRIA3;LHPP;ANKRD34C;PTCH1;HTR1B;HSPA12A;TDR…
Genes Down-Regulated In Ciliated Ependymal Cells Of HD Patients Vs Control PMID32681824	287/1359	2.1e-14	1.55e-13	0	0	1.74139	54.8472	LPGAT1;SPARC;RAPH1;1700001L19RIK;SLC4A4;PTPDC1;GPATCH8;DPYSL3;RAVER2;SOX9;CCNL1;BTRC;KIFAP3;ANKS1B;DYNC2H1;HES6;RBFOX2;MBNL2;MUSK;ARL15;CIRBP;SLC6A11;EML5;DAAM1;HECW2;AKAP9;SIK3;FAR1;RABL2;MAML3;TLN2;CCDC82;SF1;KCTD16;BEX3;INTU;WDR61;IQGAP2;C9ORF72;STRIP2;HSPH1;FAM124A;RIC8B;FLRT2;PENK;CFAP69;SARAF;TSPAN5;KCNN2;DPH6;TSPAN3;SCN3A;S100A10;SLC19A2;CDK17;CADM1;ARPP21;TIPARP;LRBA;SUCO;PARVA;ELL2;DCLK1…
Genes Down-Regulated In Expression In Cerebellum Of 12 Mon Ataxin-2 KO Spinocerebellar Ataxia 2 Mice GSE55177	429/2222	2.3e-14	1.7e-13	0	0	1.57698	49.5219	WIPF2;PTPDC1;GPATCH8;GLE1;PCMT1;ZFYVE27;AKT3;DPYSL3;NDST3;HOMER3;PKNOX1;IER5;ANKS1B;MEF2A;STARD4;RBFOX2;9330159F19RIK;PHKA1;B630019K06RIK;WDR73;RC3H2;EML5;ARMC6;RFX4;FAR1;FAR2;RABL2;NGEF;ATF4;TARSL2;PRDM15;NEDD4L;TRP53RKA;FAM171A1;PCDHA1;RDH11;D5ERTD579E;LDHD;GSG1L;ZBTB7A;RREB1;S100A10;SLC19A2;B3GALNT2;CDK17;CREBBP;PRPF38B;NDFIP2;ARPP21;TIPARP;NR2F1;CDC7;EIF2AK4;NETO2;INO80;ELL2;WDR54;CYLD;CPEB1;…
Genes Down-Regulated In Expression In Cortex Of 5 Mon R6/2 HD Mice GSE26317	121/440	2.47e-14	1.82e-13	0	0	2.42043	75.8371	SLC23A3;TLNRD1;SLC4A4;CXCL14;AI593442;AKT2;SLC16A6;CAR11;LZTS3;KCNH3;STARD4;PAQR7;PRKCB;IGFBP4;STARD8;FST;SARS;KCTD1;SLC6A11;CDYL;LEMD1;ADCY9;OBSCN;SNORC;SLC9A9;ADGRB1;MXRA7;1700016K19RIK;NECAB3;PDGFB;GPR83;ACAT2;SEC14L2;SEC14L1;HRH3;CYP11A1;RHPN1;KCNN1;OTOF;N4BP3;DRD4;ZBTB7C;NTSR2;PLK5;ARPP21;RASL10A;FAM78A;GFPT2;PBX2;DDIT4L;NR1D1;PPP1R1B;FGFR3;GSTM6;DRC3;TUBA8;PCSK2;RYR1;ZFP644;GRIK5;PCSK9;DMKN…
Genes Changed In Trichostatin A Treated STHdhQ111 Vs Control GSE129143	251/1152	2.87e-14	2.11e-13	0	0	1.80502	56.2838	CYFIP2;SLC46A3;PATJ;FAAH;WIPF2;NUDT4;NDST1;RPS16;AKT2;PPP4R4;HOMER3;SOX9;EPHB2;RBFOX2;LIMCH1;ACTN1;FBXO2;MTURN;BCR;TIAM2;GPR162;ADGRB2;RRAGD;ORAI2;ACOT2;SIK3;ASPHD2;TRIB3;ATF3;BEX3;FLII;ZBTB1;IQGAP2;ACTR3B;SEC14L2;FAM171A1;SEC14L1;EPB41L2;D5ERTD579E;INPP5J;MAP7;SARAF;TSPAN5;SNX9;TNRC18;KCNN3;ZBTB7A;RAB11FIP3;ST3GAL2;RAB11FIP5;STAT5A;FZD1;GADD45B;NEBL;SETD1B;RAB27A;PARVA;L1CAM;SMARCA1;GPR137C;MEX3…
Genes Enriched In Astrocytes Vs Microglia Or Oligodendrocytes PMID23954174	390/1986	3.44e-14	2.52e-13	0	0	1.60441	49.7355	XYLT2;SLC4A4;GCSH;DPYSL4;AKT2;AKT3;DPYSL3;RAVER2;MPV17;ZFP286;STARD4;9330159F19RIK;STARD7;CACNA2D2;PHKA1;BCR;GPR162;ARMC6;DAAM2;RFX4;RBP1;ACOT1;ASPHD2;NGEF;NEDD4L;SLC30A10;FAM171A1;RHOT2;RDH11;1110051M20RIK;RRS1;S100A13;LHPP;FZD1;MTERF2;TIPARP;NR2F1;NR1D1;SQLE;GLUD1;CPEB1;ARL2BP;FAT1;FNDC10;PCDHB6;SFXN4;UNC119;DCHS1;GSTM6;PIGS;SPEF1;TGFB1I1;SHD;TMEM47;TRIM9;HEY1;TMEM44;SMPD1;TCTN2;KCND2;METRN;ELO…
Genes Down-Regulated In Corpus Callosum Of BN Vs BACHD Mice PMID31015293	99/334	3.86e-14	2.81e-13	0	0	2.67933	82.7545	CPNE9;ANKRD13D;RAB3A;CLSTN1;FAIM2;ADARB1;CXCL14;SLC8A2;TMEM145;RIMS3;SCN1B;PPFIA3;KCNH3;UNC13A;SLC30A3;VWA5B2;GPR162;CACNB3;FNDC4;ADGRB2;GPRIN1;RELL2;KANK3;RTN2;SPTBN4;DIPK1B;NECAB3;EPHA10;CCDC149;ARHGEF25;MGST3;AGAP3;CRHR1;TMEM25;GRK2;ZMAT4;INPP5J;SMYD2;IGFBP6;RREB1;RAB11FIP5;MYH7B;KLHDC3;RASL10A;CCDC136;IQSEC3;PI4KA;CCDC92B;PLCH2;PCSK2;CNTNAP1;TMEM151B;DIRAS1;GRIK5;KCNC3;CLTB;HK1;NRGN;C1QTNF4;G…
Genes Down-Regulated In HD Grade 1 Markers In Human Caudate Nucleus (HG-U133B) GSE3790	52/127	4.87e-14	3.54e-13	0	0	4.3742	134.084	ONECUT2;AFF3;HS6ST2;RERG;C1QTNF4;JPH4;DACH1;PPP4R4;PMEPA1;ARL5A;KRT222;PRKCB;ELMOD1;KCTD1;SYTL5;FOXP1;SUB1;PITPNM3;FAR2;RGS7BP;SOWAHA;SCN4B;NGEF;DGKH;SLC35D3;KCNA1;NEDD4L;KLHL13;CACNA1E;RASD2;ARHGAP20;STRIP2;ERICH3;MAL2;GRIA3;EGR1;OSBPL8;BCL11B;KCNIP2;PCDH20;GABRA4;EPHX4;NETO2;FBXL16;PDP1;SH3RF2;NCEH1;SYNDIG1L;NBEA;PPP1R1B;LNX1;PTPN5
HD Grade 1 Markers In Human Caudate Nucleus (HG-U133B) GSE3790	56/143	5.1e-14	3.7e-13	0	0	4.06406	124.389	ONECUT2;AFF3;HS6ST2;RERG;C1QTNF4;JPH4;DACH1;PPP4R4;PMEPA1;ARL5A;KRT222;SEMA6A;PRKCB;ELMOD1;KCTD1;SYTL5;FOXP1;ITPKB;SUB1;PITPNM3;FAR2;RGS7BP;SOWAHA;SCN4B;NGEF;DGKH;SLC35D3;KCNA1;NEDD4L;KLHL13;NPL;CACNA1E;RASD2;ARHGAP20;STRIP2;ERICH3;MAL2;WASF2;GRIA3;EGR1;OSBPL8;BCL11B;KCNIP2;PCDH20;GABRA4;EPHX4;NETO2;FBXL16;PDP1;SH3RF2;NCEH1;SYNDIG1L;NBEA;PPP1R1B;LNX1;PTPN5
Up-regulated Genes In Cerebellum Of 10 Mon HD Q140 Mice Vs Q20 GSE78270	151/600	5.29e-14	3.83e-13	0	0	2.15388	65.8452	OXTR;SPON1;NEXMIF;FAM13A;PCDH11X;CARF;CDH8;HS6ST2;SYNPR;RIMS3;SLK;TUNAR;EPM2A;TLE4;DGAT2;IGFBP4;SLC6A15;CASK;THOC2;CDYL;TMEM170B;MYT1;ERN1;KCTD8;ARMCX4;SFRP4;TMX4;ADGRB2;NCL;GPRIN1;SLC9A9;SPATA13;PLAA;MAML3;TNIK;PPIG;CDKL1;COL17A1;HOMEZ;ADCYAP1R1;PCDH10;CHRNA7;GPR85;PCDH15;ARHGAP18;IQGAP2;NYAP2;HIF1A;PPL;STK3;MBTD1;TRP53I11;FLRT3;MAN2A1;ISOC1;SKIL;BRINP3;KLHDC10;TBC1D16;ABCA1;RABGAP1L;TCAF1;TMEM1…
Genes Changed In Mural Cells Of HD Patients Vs Control PMID32681824	218/969	5.48e-14	3.96e-13	0	0	1.87357	57.2081	SPON1;PID1;SPARC;RAPH1;PTPDC1;RPS6KA2;AKT3;CHORDC1;HABP4;ANKS1B;PDK1;MBNL2;PRKCB;COG5;CIRBP;ZFP619;BCR;EML4;TIAM2;ADCY9;DAAM2;KCNQ3;SIK3;ASTN2;LRPAP1;BEX3;ANAPC16;CTBP2;TMTC1;SLC30A10;HSPH1;FLRT2;EPB41L2;D5ERTD579E;PENK;CHST15;MAP7;DYM;PIP5K1B;SNX9;DPH6;TNRC18;SLC19A1;ZBTB7C;ABCA1;EGR1;CREBBP;CRADD;ARPP21;GADD45B;INSR;RANBP17;PDE2A;HSPA12A;ELL2;UCK2;CREBRF;ITGBL1;CALM1;ITM2C;PTPRS;SIPA1L3;PTPRF;A…
Genes Up-Regulated In The Striatum Of zQ175 Neo- Mice Vs WT GSE123657	373/1888	5.7e-14	4.1e-13	0	0	1.61337	49.2022	FAAH;OXTR;PID1;CMAS;WDSUB1;PNMAL1;TMEM200A;NEXMIF;SPINT2;DCAF5;PTPDC1;ZDBF2;GCSH;GLE1;SAMD14;DPYSL4;OGFOD1;DPYSL3;NDST3;NIPAL3;TRIM26;SLC12A6;ARL10;UNC13B;HES6;ATP6V1G2;RBFOX2;COG5;STARD7;SLC6A15;KRT1;CACNA2D2;ISLR2;ACSL5;CSNK1D;B630019K06RIK;SOX11;ZFP618;VWA5B2;DSG1C;CARHSP1;SPIN2C;ZFP7;CCDC82;VPS28;SKAP2;BEX3;BEX2;IGSF3;MAGED1;PCDH10;ABCB4;FLII;PCDH15;TMTC1;TAPBPL;NYAP2;DEDD2;STRIP1;STRIP2;PRRC…
Genes Up-Regulated In Friedreich Ataxia iPSCs Expression Vs SC31-MSC Cell Line GSE22651	749/4304	6.36e-14	4.56e-13	0	0	1.42481	43.2938	PID1;SERPINE2;TMEM200A;XYLT2;RAPH1;ADARB1;ACCS;DCAF5;ALKBH6;SLC4A4;PTPDC1;NDST1;CNST;ZFYVE27;AI593442;PSMD5;AKT3;WDR91;HOMER3;MPV17;IER5;MEF2A;MBNL2;RBFOX2;IAH1;FIBCD1;HPCAL1;MRTFA;SCAMP1;RC3H2;ADCY9;DAAM2;HECW2;ORAI3;MAP1A;ACOT2;ACOT1;ASPHD2;RABL2;ATF6;ACOT5;PLBD2;VPS28;SKAP2;ACOT3;LRPAP1;MTMR3;MEAF6;TARSL2;CTBP1;FLII;LYPD1;ENDOD1;AGAP3;TAPBPL;HIF1A;TRP53RKA;FAM171A1;ABR;FLRT2;HLCS;1110051M20RIK…
Down-regulated Genes In Cerebellum Of 6 Wk ATXN2Q127 Mice E-MTAB-6293	104/361	6.72e-14	4.81e-13	0	0	2.5752	78.1086	CEP126;RIPOR2;TLNRD1;RAPH1;GPR63;RNF19B;RORA;SOX3;DACH1;CNTNAP5B;FAM174B;PPP4R4;HOMER3;SOX9;ANKS1B;ACVR1;PPP1R16B;HPCAL1;CACNA2D2;ZBTB34;PLPP6;CACNB2;PCP4;MAP1A;FAR2;KCTD12;ASTN2;NPTXR;ACOT5;PDE9A;DGKH;CABP7;CTTNBP2;ITPR1;TMTC1;SLC1A6;CACNA1G;RHOBTB2;STRIP2;ARHGAP20;ZMAT3;LONRF1;SRGAP1;GRIA3;LHPP;PTCH1;HTR1B;HSPA12A;GNAO1;BC005537;ARHGAP32;CPEB1;DLG2;PPP1R1B;CNTN3;PRRT4;FGF11;TUBA8;DPP10;DOCK4;KC…
Genes Down-Regulated In Chat-expressing Interneurons Of zQ175DN Vs WT PMID32681824	164/674	9.73e-14	6.94e-13	0	0	2.06226	61.7881	RAB3C;PID1;ANKRD13D;CCNT2;LPGAT1;UXS1;WIPF2;RAPH1;MSMO1;GOLGA4;FNTA;RPS6KA2;GRB10;TOM1;DAG1;EP300;CAR11;BTRC;TLE4;MAGI3;ALG5;CSNK1D;THOC2;MINPP1;DOK5;HECW2;XRN2;SIK3;PHIP;FAR2;PPIG;LY6H;ATP6V0D1;CCDC82;NSMAF;SNRPB;ANKRD17;NECAB2;ZCCHC8;MTMR3;CCDC149;CTTNBP2;TMTC1;FOXO1;STK3;PCSK1N;RIC8B;SEC14L1;FLRT2;PRKAR2B;PSAP;PENK;SYNDIG1;PIP5K1B;DRD2;SCN3B;BRINP3;BPTF;KLHDC2;CREBBP;TCAF1;NDFIP1;ARPP21;XRCC4;…
HD Down-Regulated Genes In Human Prefrontal Cortex PMID29375298	242/1112	9.94e-14	7.07e-13	0	0	1.7993	53.8696	CYFIP2;PITPNA;HS6ST2;NDST1;SAMD15;AI593442;NIPAL3;EPHB2;BTRC;KIFAP3;FBXO9;RBFOX2;ATP6V1G2;UNC13A;WSB2;ACTN2;PRKCB;METTL2;FNDC4;ADGRB2;HECW2;TLN2;ASTN2;PLBD2;EPHA10;NKAIN2;NEU3;STRIP2;INPP5F;VPS8;SYNDIG1;SCN3B;RAB11FIP4;SMIM10L2A;NDFIP1;SIAH3;IQSEC3;RANBP17;SLC35E3;NETO2;HSPA12A;DCLK1;UCK2;ZFP512B;CALM3;SFXN2;CALM1;CDS2;PIGS;PTPRS;TMEM151B;TENM4;KCNC3;DIRAS1;SLC7A14;ABCC12;RYR3;SMPD3;TRIM9;TUBA1B;…
Up-regulated Genes In Cerebellum Of 6 Mon HD Q175 Mice Vs Q20 GSE73468	317/1555	1.02e-13	7.22e-13	0	0	1.66855	49.916	TRIR;WDSUB1;NEXMIF;XYLT2;DCAF5;RPS6KA4;SYNPR;COMTD1;SAMD14;GOLGA4;SCN11A;NDST3;NIPAL3;TUNAR;IER5;TBC1D10A;DYNC2H1;SLC6A15;BOLA1;CSNK1D;EBF4;VWA5B2;MTURN;TIAM2;EML4;EML5;SFRP4;GPR162;ADGRB2;AKAP9;ASPHD2;MAML3;UBA52;LRPAP1;ADCYAP1R1;BEX2;TMEM161A;CTBP1;MAGED1;NEDD4L;TAPBPL;MRPL12;NYAP2;SMIM7;PPL;FAM149A;STRIP1;DHX32;PRRC1;FLRT3;NEU1;N4BP3;SNX8;PCK2;TRPM4;PPP1R26;GM10471;SMIM10L2A;FIS1;NDFIP1;ARPP21…
Up-regulated Genes In Striatum Of 10 Mon HD Q175 Mice Vs Q20 PMID26900923	384/1964	1.09e-13	7.74e-13	0	0	1.59334	47.5507	PNMT;TRIR;FAAH;OXTR;PID1;CMAS;WDSUB1;A430005L14RIK;WDR83;SPINT2;DCAF5;PTPDC1;IKZF5;NUDT4;GCSH;GLE1;SAMD14;NDST3;WDR91;LIPG;ARL6IP4;TRIM26;LGALS8;KIFAP3;PDK1;UNC13B;HES6;STARD7;SLC6A15;ISLR2;ACSL5;CSNK1D;B630019K06RIK;SOX11;VWA5B2;RC3H2;CARHSP1;TRIM17;ACOT1;KDELR2;ZFP7;ATF3;VPS28;RNF122;SKAP2;BEX3;BEX2;SAR1A;IGSF3;CTBP1;MAGED1;PCDH10;ABCB4;MGST3;PCDH15;TAPBPL;DEDD2;TRP53RKA;COMMD9;PRRC1;RACGAP1;PC…
Mouse Striatum Drd1 Medium Spiny Neuron Markers PMID19013282	172/720	1.35e-13	9.51e-13	0	0	2.01448	59.6972	MTCH1;CPNE8;DGKB;PCDH11X;RNF19B;PPP2R2A;ICAM5;DCAF5;2900026A02RIK;FGF3;RPS6KA3;AKT2;SESN1;RPS6KA2;DPF1;CHP1;AGFG2;UNC13A;SEMA6A;IGFBP4;ARL15;CSNK1D;TBC1D2B;DHDDS;BCR;KCTD8;CACNB2;MINPP1;CACNB3;TBC1D20;SPATA13;DOK7;ORAI2;CMPK2;PLAA;RIN1;KMT2E;COPB2;ZFP346;SMYD5;ARHGEF25;CTTNBP2;SLC35D3;ITPR1;6430548M08RIK;ACTR3B;PHF21A;GMCL1;RHOBTB2;GOLGA7B;ASIC4;CHTF8;SEC14L1;FLRT3;SYNDIG1;ISOC1;PIP5K1A;DRD1;MSC;…
Postsynaptic Density Proteins PMID21170055	312/1530	1.57e-13	1.11e-12	0	0	1.66789	49.1686	CYFIP2;FAAH;WIPF2;PITPNA;RAPH1;ICAM5;SLC4A4;PCMT1;RPS16;DPYSL4;DPYSL3;WDR91;LGALS8;ANKS1B;MCCC2;EPHA4;ATP6V1G2;UNC13A;9330159F19RIK;ACTN2;LIMCH1;PRKCB;ACTN1;FBXO2;AP1B1;CACNA2D2;CSNK1D;ACSL4;BCR;AFG3L2;DAAM1;DAAM2;HECW2;ADGRB1;MAP1A;VDAC2;KCTD12;TLN2;RIN1;ATP6V0D1;KCTD16;IGSF8;SPTBN4;SAR1A;TARSL2;EPB41;CTBP1;FLII;6430548M08RIK;AGAP3;SEC14L2;ABR;FAM171A1;RHOT2;HSPH1;EPB41L1;PRKAR2B;EPB41L2;PCBP1;V…
Genes Changed In dSPNs Of HdhQ111 Vs HdhQ20 PMID32681824	38/78	1.68e-13	1.18e-12	0	0	5.97495	175.751	CYFIP2;GSK3B;HLF;CELF1;MTCL1;DUSP18;AGAP3;SIPA1L3;RHOBTB2;JPH4;RGS4;SEC14L1;EPB41L1;CHN1;CKB;SLC25A23;SOCS7;GIT1;ANKS1B;PPP1R16B;ZBTB18;EGR1;LYNX1;DMTN;ARPP21;PRKCB;KCTD1;FBXL16;BCR;GNAO1;PDP1;CACNB3;PDE10A;SLMAP;MAP1A;PPP1R1B;CALM1;SCN4B
Genes Down-Regulated In Sst/Npy-expressing Interneurons Of R6/2 Vs WT PMID32681824	76/233	1.7e-13	1.19e-12	0	0	3.06648	90.1655	RIPOR2;GSK3B;SETD2;PTPRS;DGKB;WWC1;RAPH1;ZBTB20;RORA;DOCK10;TRIM9;DACH1;RIMS3;RASSF3;BASP1;STMN1;TBC1D30;REV3L;PHF24;PMEPA1;DLGAP2;EPHA4;DGAT1;COG5;STRBP;MAGI3;RALGAPA2;LMTK3;CTDSPL;ANO4;FOXP1;ENAH;OLFM2;PCP4;RARB;HAP1;RGS7BP;SRSF7;GAS7;HDAC4;SPTBN4;EPHA10;UHRF2;NTM;NTN4;PTN;NYAP2;HDAC9;RAP1GAP;CAMKK2;ATXN1;2210408I21RIK;OTOF;CAMTA1;TNRC18;CKB;SLC25A23;DTD1;SRGAP1;NDFIP1;BCL11B;ANKRD24;PLCL2;NMNA…
Down-regulated Proteins In The Cortex Of R6/2 Vs WT PXD008099	53/135	2.14e-13	1.49e-12	0	0	4.07756	118.961	ANKRD13D;KCNC3;RASGRF2;HAPLN4;LAMP5;GRM2;DLGAP2;LZTS3;HMGCS1;PRKCB;ACTN1;LMO7;APRT;ACAP2;GPD1;ASTN2;NPTXR;RIN1;SCN4B;NGEF;NECAB2;MTPN;RGS14;KCNA1;ITPR1;AK5;RASGRP2;CAMKK1;CAMKK2;DNAJB1;BRINP2;ABLIM2;LDHD;GSG1L;RGS20;CACNG3;GRIA3;LINGO1;SEMA4A;SYT2;SGTB;CCDC136;PDE2A;SLC4A10;FBXL16;BAIAP2;SPATA2L;PDE10A;SYT12;LPCAT4;PPP1R1B;PTPN5;HSPA1A
Genes Changed In HD Vs Normal GPCs GSE105041	516/2804	2.19e-13	1.52e-12	0	0	1.49426	43.5555	PATJ;PID1;SERPINE2;WIPF3;SCX;1700001L19RIK;ACCS;FNBP1L;DCAF4;ZFYVE28;PPP4R4;DPYSL3;NDST3;LIPG;STMN1;SAMD10;UNC13A;9330159F19RIK;COL23A1;CACNA2D2;SOX11;SYTL5;DAAM1;DAAM2;HECW2;SPIN2C;ACOT2;ACOT1;MAML3;ASTN2;ACOT5;NGEF;SKAP2;ACOT3;ZBTB8A;NEDD4L;IQGAP2;MRPL12;XKRX;EPB41L1;ADAMTS19;PRKAR2B;EPB41L2;SYNDIG1;CHST15;CFAP65;ZBTB7C;ABCA1;ARPP21;GPR12;CADM1;PLK2;NR1D1;GRIN2B;DAZL;SLC6A6;GLUD1;SFXN3;FAT1;FND…
S1 Pyramidal Neuron-Enriched Genes PMID25700174	84/272	2.82e-13	1.95e-12	0	0	2.83367	81.8883	CPNE9;GPR26;ZFP367;ANKRD13D;MCTP1;MEDAG;C77080;RPS6KA3;GRM2;LSM11;RASGEF1C;GRM8;DACT2;RSPO1;ERC2;TLE4;KRT222;CPA2;ARG2;KCNH4;STRBP;FST;ISLR2;MYRIP;FNDC9;VWA5B2;RANGAP1;UCHL5;NME1;TIAM2;CACNB3;PCP4;SNORC;CCKBR;ADGRB1;RRAGD;NUMB;CMPK2;SCN4B;CDH18;OSBP2;SLC24A2;NECAB3;MGST3;SEMA3A;ILDR2;GDPD5;CRHR1;PSMB10;CAMKK2;GOLGA7B;ARHGAP20;GPR153;ABI3BP;E2F1;GSG1L;EXPH5;TSNAX;WNT10A;PLK5;ARPP21;TMEM74B;KCNJ11;…
Expression In Hippocampus Of 20 Wk N171-82Q HD Mice GSE44306	85/277	3.02e-13	2.08e-12	0	0	2.80805	80.956	CPNE9;RYR1;KCNG2;GALNT13;ONECUT2;LRRC10B;GBE1;WIPF3;PCDH11X;MAST1;GXYLT2;HTR4;SIPA1L2;LYST;NAT14;4930447C04RIK;GRM2;CNTNAP5B;ENC1;GRB10;WDR6;HOMER3;GGACT;LGALS8;MYBL1;GIT1;LZTS3;BOK;YWHAH;KCNH3;LYNX1;USP48;DGAT2;TRPC6;SLC30A3;PRKCB;CIRBP;KCTD4;ANO3;DUSP7;OLFM2;GPD1;KCNQ3;ORAI2;ROR1;TNFRSF25;SOWAHA;RIN1;CDH18;KDM7A;DDX5;CAMK2D;CABP7;SEMA3A;IQGAP2;NTS;CAMKK1;FAM117A;CACNA1G;DDN;RASD2;BRINP1;GNG4;CA…
Genes Down-Regulated In Diacylglycerol Kinase Inhibitor II Treated STHdhQ111 Vs Control GSE129143	520/2835	3.09e-13	2.13e-12	0	0	1.48823	42.8714	WIPF2;XYLT2;SCX;DCAF5;NDST1;CNST;AKT2;AKT3;WDR91;LIPG;ANKS1B;STARD4;RBFOX2;DDX11;MRTFA;BCR;EML4;MAP1A;ORAI2;VPS28;NGEF;RNF122;SKAP2;SLBP;LRPAP1;PIF1;CTBP2;TARSL2;FLII;IQGAP2;PRDM10;FAM149A;RHOT2;FLRT2;EPB41L1;PRKAR2B;EPB41L2;D5ERTD579E;CHST15;S100A13;ZBTB7A;ST3GAL2;S100A10;FZD1;WNT10A;JUP;NEBL;SETD1B;LRBA;PBX2;ELL2;PHC3;SQLE;SLC6A6;GLUD1;SFXN3;UNC119;PAM;SETD2;PHF1;TGFB1I1;ARHGAP1;CLTB;PYGL;MED16…
Genes Up-Regulated In Pvalb/Th-expressing Interneurons Of R6/2 Vs WT PMID32681824	110/399	3.15e-13	2.16e-12	0	0	2.42306	69.7531	LPGAT1;GALNT13;NEXMIF;PCDH11X;ZBTB20;ADARB2;GPATCH8;HS6ST2;IGF1R;DOCK10;DACH1;EP300;RGS7;GUCY1A2;MLIP;ANKRD45;THOC2;OLFM3;SIK3;PHIP;TNIK;DENND6A;PPIG;NTM;ANKRD12;LIN7A;KLC1;PRDM10;CACNA1E;PHF21A;SPATA7;MBTD1;NKAIN2;GRK5;SNTG1;1110051M20RIK;AP4S1;BRINP3;KLHDC10;CREBBP;RABGAP1L;CADM1;RANBP17;SLC4A10;PHC3;PTPRD;SDK1;LRFN5;STAG1;DIAPH2;RALYL;CNTN4;CDK13;OGT;RBM28;DOCK4;MCTP1;TCF20;LDB2;RYR3;GPI1;EPB4…
Genes Down-Regulated In Parkinson Disease Markers In Human Substantia Nigra GSE26927	230/1054	3.2e-13	2.19e-12	0	0	1.80207	51.8483	CYFIP2;PID1;CMAS;NEXMIF;COMTD1;LSM11;CNST;PPP4R4;4921524J17RIK;RESP18;BTRC;STARD4;RBFOX2;COG5;CACNA2D2;SOX11;SCAMP1;GPR162;DAAM1;RFX4;SUB1;AKAP9;KCNQ3;ASTN2;1700016K19RIK;KCTD16;BEX3;BEX2;NECAB3;IGSF3;SLC35D3;LYPD1;PCDH15;NEDD4L;PCDHA1;GSG1L;PIP5K1B;SCN3A;ST3GAL2;B3GALNT2;EGR1;NDFIP1;LRRN3;GADD45B;SIAH3;PKIB;NCEH1;CYP2S1;SDC1;CPEB2;ACHE;GPR26;CETN2;GRIK5;GBE1;PTPRO;CLTB;AKAP12;TRIM9;FAM102B;NNT;S…
Genes Up-Regulated In Expression In SIVF017 Line NSCs Vs ESCs GSE34201	759/4402	3.36e-13	2.3e-12	0	0	1.40684	40.4066	CYFIP2;TRIR;TLNRD1;PNMAL1;RAPH1;STMN4;DCAF5;NDST1;PCMT1;SAMD14;DPYSL4;AI593442;LIPG;STMN1;HOMER3;IER5;ANKS1B;HES6;MBNL2;9330159F19RIK;WSB2;HPCAL1;SOX11;FRS3;RC3H2;GPR162;ADCY9;DAAM1;DAAM2;RFX4;ORAI3;MAP1A;FAR1;RABL2;ATF6;ATF3;VPS28;RNF122;ATF4;SLBP;NAA60;MTMR3;SAR1A;ANAPC16;MEAF6;TARSL2;CTBP1;PDGFB;LYPD1;ENDOD1;NEDD4L;AGAP3;C9ORF72;HIF1A;TRP53RKA;ABR;PCDHA1;HLCS;EPB41L1;FLRT3;D5ERTD579E;1110051M2…
Expression In 9 Wk TIF-IA KO HD Mice GSE29647	186/806	3.94e-13	2.69e-12	0	0	1.92754	55.0534	RAB3B;SPON1;SLC4A4;GBA2;GPATCH8;RGS4;NDST1;CCND2;DPYSL4;AKT2;SESN1;RPS6KA2;GM3558;DPYSL3;OSBP;STMN1;CCL27A;SLC12A6;KIFAP3;PPFIA4;MED1;RNF44;MUSK;ACTN2;LIMCH1;ACTN1;PUS1;CIRBP;MRTFA;EPDR1;SCAMP1;TUG1;ATAD3A;ADCY9;EHBP1L1;GPD1;PKP2;NHP2;ATP6V0D1;ATF6;TRIM11;ATF4;SNRPB;KMT2E;ANKRD17;ADCYAP1R1;ISYNA1;KMT2A;PNP2;SDC3;SLC41A1;GPR83;FOXO1;GMCL1;SLC9A1;RHOBTB2;SEC14L1;BRINP1;RACGAP1;HLCS;CHST15;AI413582;…
Genes Up-Regulated In Influence Of Hdac4 Reduction On Expression In 15 Wk WT Mice GSE38219	280/1351	4.66e-13	3.17e-12	0	0	1.69583	48.1518	NEXMIF;PPAN;EMC10;ADARB1;GLE1;NDST1;ADGRA1;LIPG;DPF1;PKNOX1;IER5;AGFG2;MED1;IAH1;PRKCB;CMC2;CACNA2D2;ZFP618;VWA5B2;RC3H2;GCAT;GTPBP3;GPR162;GAREM1;SNORC;HECW2;ADGRB1;GRB7;SPTBN4;MTMR3;TMEM161A;MEAF6;IGSF3;EPB41;PCDH15;NEDD4L;LIAS;ZBTB4;GMCL1;PCBP4;D5ERTD579E;VPS8;CFAP69;CHST15;DYM;KCNN1;TNRC18;RREB1;VAT1;MYH7B;EGR1;FIS1;CREBBP;PRPF38B;EGR4;BCL11B;GADD45B;GTF2IRD2;SETD1B;PBX2;NETO2;NR2F6;SRPK1;UCK…
Genes Down-Regulated In Expression In NSCs Lines HD180i.5 And HD60i.4 From HD Patients GSE37517	259/1229	5.75e-13	3.9e-12	0	0	1.72823	48.7106	CYFIP2;CPNE8;SPON1;SCX;ADARB1;HS6ST2;ADGRA1;RASSF3;4921524J17RIK;RPS6KA2;LIPG;DAG1;SLC12A6;PDK1;HES6;RBFOX2;ATP6V1G2;MUSK;9330159F19RIK;ACTN2;LIMCH1;CACNA2D2;ADGRA3;SOX11;SYTL5;DKK2;EML4;ADGRB2;ADGRB1;MAP1A;RRAGD;ADCYAP1R1;IGSF3;LYPD1;PCDH15;NEDD4L;NYAP2;CRHR1;NKAIN2;STRIP2;NKAIN3;STC2;KCNN2;DPH6;KCNN3;TSPAN3;SCN3B;EXPH5;S100A10;SRPK3;WNT10A;ARPP21;MTERF2;FAM78A;L1CAM;HSPA12A;GRIN2B;NET1;KLHDC8A;…
Genes Down-Regulated In Cortex Of HdhQ175 Mice GSE89505	271/1302	6.98e-13	4.72e-12	0	0	1.70307	47.6709	CPNE9;SLC23A3;PNMT;POP5;WIPF3;SCX;HTR4;SLC4A4;MSANTD1;PPP4R4;RPS6KA2;LIPG;ZP3R;STARD8;FIBCD1;UPB1;DSG1C;KRT9;THEG;GM9925;TRIB3;MXRA7;RIN1;ANKK1;1700016K19RIK;NGEF;KCTD16;NECAB2;PIF1;EPHA10;SLC35D3;STC1;PKHD1;SEC14L3;STRIP2;SEC14L1;PENK;LDHD;GSG1L;OTOF;SFN;RREB1;MYH7B;EGR1;PLK5;ARPP21;TIPARP;FAM78A;DDIT4L;NR1D1;NET1;PPP1R1B;GIPC2;PLCH2;IFI27L2B;HRK;BSPH1;RYR1;SRPX;CDKN1A;LRRC10B;KCNC3;CITED4;PCSK9…
Alzheimer Disease Down-Regulated Genes In CA1 Area Of Hippocampus Liang PMID18270320	473/2549	7.55e-13	5.09e-12	0	0	1.50239	41.9345	CYFIP2;PNMAL1;UXS1;DCAF8;STMN4;SPINT2;ADARB1;ZDBF2;PCMT1;CNST;AKT3;MPV17;MEF2A;UNC13B;MED1;PRKCI;STARD4;IAH1;UNC13A;WSB2;PRKCB;SCAMP1;BCR;MAP1A;ACOT2;ACOT1;FAR1;ATF6;ACOT5;UBA52;VPS28;ACOT3;SAR1A;MEAF6;TARSL2;CTBP1;ENDOD1;NEDD4L;WDR61;ABR;EPB41L1;RDH11;D5ERTD579E;RRS1;VPS16;VTI1B;NDFIP2;NDFIP1;H3F3B;MTERF2;NEBL;PLK2;EDEM1;LRBA;THAP12;NETO2;ELL2;WDR54;HNRNPM;SQLE;CYLD;GLUD1;ADI1;NAPEPLD;SFXN4;PAM;…
Genes Changed In Ciliated Ependymal Cells Of zQ175DN Vs WT PMID32681824	115/430	8.38e-13	5.64e-12	0	0	2.32491	64.6513	DGKD;GALNT13;UBXN2B;DGKB;WWC1;ZFAND5;RORA;SLC4A4;GPATCH8;HS6ST3;IGF1R;SYNPR;DACH1;AKT3;SOX9;STK32A;ENPP5;DYNC2H1;EPHA6;PRKCB;TPM1;PHKA1;SHISA9;EML5;CACNB2;TMX4;OLFM3;DAAM1;STIM2;RFX4;SPATA13;SIK3;MAML3;RABL2;TNIK;KCTD16;DDX5;CTTNBP2;ARL3;ANKRD12;FBF1;ITPR1;NEDD4L;ARHGAP18;MRO;HNRNPLL;FOXO1;NKAIN2;ATXN1;KIF3A;SNTG1;1110051M20RIK;ERI3;PENK;RREB1;BRINP3;GRIA3;PLXNA4;INSR;CRIM1;GULP1;PTPRD;DLG2;NBEA;…
HD Grade 4 Markers In Human Caudate Nucleus (HG-U133A) GSE3790	161/674	8.45e-13	5.67e-12	0	0	2.01002	55.8765	SCARB1;SPON1;SERPINE2;FAM13A;GMNN;ZFAND5;RNF19B;ZBTB20;ICAM5;SLC8A2;AKR7A5;DPYSL4;AKT3;TBC1D30;DAG1;LGALS8;PPP1R16B;CAST;RNF44;RBFOX2;ACTN2;ACTN1;ADGRA3;LMO7;THOC2;CASD1;TUG1;FOXP1;CACNB3;MAP1A;ORAI3;PHIP;FAR2;TNIK;PPIG;CCNO;SF1;NECAB2;BRSK2;MTMR3;KMT2A;NTM;TCF7;TMEM59L;ENDOD1;ITPR1;6430548M08RIK;SMIM7;RASGRP2;FAM149A;FOXO1;RHOBTB2;STK3;SEC14L2;ABR;GRK3;BAG5;PMVK;KCNN2;DRD1;KDSR;DRD2;SCN3B;SNX7;Z…
Down-regulated Genes In Cerebellum Of N171-82Q Mice GSE107613	79/254	9.51e-13	6.36e-12	0	0	2.85983	79.1652	MUS81;CNTNAP1;GALNT16;HR;JADE2;TMEM141;HAPLN4;ETS2;SLC8A2;TMEM266;GRM2;ARMH4;ADAMTS3;HEY1;KLF10;TLE2;PAQR7;DUSP1;MAMSTR;ABCC8;AMPD2;GPCPD1;TIAM1;DAAM2;PEAK1;RTN4RL1;PITPNM3;ROR1;CHIL5;SPACA6;RNF122;VWA7;GRB7;ZFP467;GLS2;NEXN;6430548M08RIK;AK4;LTBP2;ADAMTS10;CRHR1;CAMKK1;CAMKK2;RASD2;STRIP2;GRK3;PRR14L;GRK5;HLCS;PCBP4;PENK;CHST15;INPP5J;CAMTA1;PIP5K1B;SPTSSB;CACNG3;LURAP1;PLXNA4;EXPH5;PLK5;JUP;GOL…
Genes Up-Regulated In Friedreich Ataxia iPSCs Expression Vs Mel1 P51 Cell Line GSE22651	497/2710	1.25e-12	8.35e-12	0	0	1.48299	40.644	CYFIP2;STMN4;ADARB1;DCAF5;PTPDC1;SAMD14;AI593442;PPP4R4;DPYSL3;WDR91;LIPG;IER5;MBNL2;DDX11;COL23A1;SOX11;FRS3;BCR;GPR162;DAAM1;ORAI3;MAP1A;RBP1;ASPHD2;RABL2;PLBD2;VPS28;MTMR3;CTBP1;FLII;FIGNL2;AGAP3;PRDM10;FAM171A1;RHOT2;HLCS;FLRT3;1110051M20RIK;S100A10;JAG2;CREBBP;JUP;NEBL;NR2F1;THAP12;L1CAM;WDR54;UCK2;CPEB1;RNF103;ARL2BP;SFXN4;PAM;CPEB2;EZH2;PHF2;CDKN1A;PHF1;TCF20;MED16;MMP23;JPH4;TUBA1B;HEY1;T…
Genes Down-Regulated In Astrocytes Of HdhQ111 Vs HdhQ20 PMID32681824	24/37	1.3e-12	8.66e-12	0	0	11.5702	316.647	NECAB2;COX8A;CEP126;ARPP21;HPCA;MED16;DYNLL1;GPR6;KRT9;RGS4;CACNB2;CYLD;SH3RF2;PCP4;PDE10A;ARHGDIB;PENK;RESP18;PPP1R1B;EIF4H;SOCS7;PTPN5;SCN4B;JCAD
Genes Up-Regulated In Expression In WT4 Line NSCs Vs ESCs GSE34201	726/4209	1.36e-12	9.03e-12	0	0	1.40109	38.2826	CYFIP2;TRIR;TLNRD1;PNMAL1;DCAF5;GLE1;SAMD14;CNST;LSM11;DPYSL4;PSMD5;AKT3;LIPG;STMN1;HOMER3;IER5;MEF2A;HES6;MED1;MBNL2;WSB2;DDX11;HPCAL1;SOX11;WDR73;FRS3;UPB1;RC3H2;GPR162;ADCY9;DAAM1;RFX4;MAP1A;ORAI2;SPIN2C;RABL2;ATF6;ATF3;VPS28;RNF122;SF1;ATF4;SLBP;PIF1;SAR1A;MEAF6;TARSL2;CTBP1;ABCB4;PDGFB;LYPD1;ENDOD1;FIGNL2;AGAP3;C9ORF72;ANAPC11;TRP53RKA;FAM171A1;ABR;HSPH1;RIC8B;FLRT2;HLCS;EPB41L1;FLRT3;EPB41L…
Cortex RNA M2 Module (Blue) PMID26900923	39/86	1.46e-12	9.68e-12	0	0	5.21867	142.218	NECAB2;LRRC10B;SLC35D3;NEXN;GPR83;KCNA5;DMKN;HTR4;RASGRP2;FGF3;RASD2;DACH1;GNG7;PENK;DRD1;DRD2;TAC1;RXRG;ZSWIM5;ACTN2;GPX6;HTR1D;TBC1D8;GPR6;UPB1;ANO2;KRT9;SH3RF2;CD4;PDE10A;ADORA2A;STK26;PPP1R1B;RARB;ANKRD63;PTPN7;ANKK1;SCN4B;ITGA9
Genes Changed In Endothelial Cells Of zQ175DN Vs WT PMID32681824	210/954	1.54e-12	1.02e-11	0	0	1.81688	49.4149	LPGAT1;SPARC;FNBP1L;SLC4A4;GPATCH8;GOLGA4;CNST;RPS16;NDST3;CHORDC1;BTRC;IER5;MEF2A;ACVR1;EPHA4;MED1;ARL15;LIMCH1;COG5;PLPP6;ADCY9;AKAP9;KCNQ3;KCTD16;PDGFB;GMCL1;MBTD1;NKAIN2;FLRT2;PRKAR2B;EPB41L2;PENK;S100A13;PIP5K1A;ZBTB7A;CREBBP;PRPF38B;CADM1;LRRN3;NEBL;LRBA;INSR;NET1;BC005537;SLC6A6;STAG1;ARL2BP;CREBRF;CALM1;CDK13;SETD2;TENM4;TCF20;SIPA1L3;PTPRF;RYR3;AKAP12;AKAP13;MED13;TMSB4X;REV3L;SDF4;DLGAP…
Neuro2a Htt72Q-i Vs Htt25Q-ni PMID28743452	750/4377	2.02e-12	1.33e-11	0	0	1.39171	37.4732	CYFIP2;TLNRD1;RPL31;WIPF3;STMN4;PTPDC1;ZDBF2;GLE1;GCSH;CNST;AKT3;STMN1;PWWP2A;ANKS1B;MED1;PRKCI;9330159F19RIK;WSB2;STARD7;DDX11;SOX11;RC3H2;BCR;EML4;EML5;RBP4;DAAM1;ARMC6;ACOT2;ACOT1;FAR1;ASPHD2;ASTN2;ATF6;UBA52;PLBD2;ATF3;ATF4;SLBP;PIF1;TARSL2;IQGAP2;MRPL12;PRDM10;C9ORF72;ADAMTS10;FAM149A;DEDD2;FAM171A1;RHOT2;HSPH1;TERT;HLCS;EPB41L1;ZBTB7A;ST3GAL2;SLC19A1;VTI1B;S100A10;ABCA1;PLK3;MYH7B;ARPP21;GP…
Genes Down-Regulated In Expression In Cerebellum Of Spinocerebellar Ataxia 1 Mice GSE9914	302/1502	2.4e-12	1.58e-11	0	0	1.63385	43.7111	CYFIP2;LPGAT1;PPAN;GDE1;DCAF8;ADARB1;SLC4A4;GBA2;HS6ST2;GLE1;PCMT1;GOLGA4;ZFYVE27;AKT2;NDST3;STMN1;HABP4;HOMER3;CCNL1;KIFAP3;MEF2A;MED1;IAH1;UNC13A;WSB2;ACTN1;ALG5;HPCAL1;CACNA2D2;BCR;EML5;TIAM1;FNDC4;ADGRB1;AKAP9;XRN2;FAR1;KCTD12;GCDH;SAR1A;ANAPC16;6430548M08RIK;MRPL12;HNRNPLL;CRHR1;GMCL1;TRP53RKA;ABR;DHX32;PCDHA1;EPB41L1;RDH11;PCBP4;PCBP1;NEU1;MAP7;DYM;RREB1;ST3GAL2;PCK2;LHPP;B3GALNT2;BBS2;EGR1…
PC12 Htt-Q74 Vs PC12 Htt-Q23 Overall PMID28499347	422/2244	2.44e-12	1.6e-11	0	0	1.51914	40.6212	PATJ;SCX;SPINT2;ELK1;PSMD5;AKT3;MPV17;STARD4;IAH1;PRKCB;EML5;RBP4;ORAI3;ACOT2;ACOT1;ASPHD2;ACOT5;ATF3;PLBD2;ACOT4;ACOT3;SLBP;LRPAP1;NEDD4L;TAPBPL;FAM171A1;FLRT3;CFAP69;S100A10;PLK3;PRPF38B;WNT10A;CADM1;PLK2;PBX2;NR1D1;L1CAM;WDR54;SQLE;UCK2;SFXN3;SFXN4;UNC119;PLCH2;PRRT4;GSTM6;GSDME;PHF1;SHD;LETM2;PANX2;MED13;SMPD1;TRIM3;TIMP2;RSPO1;GPRASP2;DUSP1;METRN;TESC;WNT9A;WDR35;FAHD2A;LRRC42;SIRT3;SLC7A4;N…
Genes Down-Regulated Upon DOC Treatment In HdhQ111 Striatal Cells Vs HdhQ7 GSE98739	707/4094	2.45e-12	1.6e-11	0	0	1.39989	37.4243	CYFIP2;PID1;SERPINE2;TMEM200A;NEXMIF;RAPH1;SPINT2;ADARB1;SLC4A4;RXFP3;ZFYVE28;GCSH;PCMT1;DPYSL4;MSANTD1;AI593442;GJA3;RAVER2;DPYSL3;NDST3;LIPG;IER5;SAMD10;ZFP286;ANKS1B;UNC13B;STARD4;UNC13A;DDX11;FIBCD1;SOX11;DKK2;EML4;EML5;GPR162;DAAM1;HECW2;SPIN2C;ACOT2;ACOT1;ASPHD2;MAML3;ATF6;ACOT5;ATF3;NGEF;SF1;ATF4;PIF1;PDGFB;ENDOD1;WDR61;IQGAP2;MRPL12;TRP53RKA;FAM171A1;RHOT2;FLRT2;RDH11;FLRT3;EPB41L2;ZFP180…
Genes Up-Regulated In Pons Of 28 Week WT Mice Vs Atxn 1 154Q/2Q Mice Both Treated With Vehicle GSE114674	369/1915	2.88e-12	1.87e-11	0	0	1.55838	41.4133	CPNE9;POP5;PID1;LPGAT1;CMAS;SPARC;CPNE7;PITPNA;GDE1;STMN4;ADARB1;SLC4A4;GLE1;LSM11;AI593442;RASSF3;AKT3;CHORDC1;STMN1;HABP4;SCN1B;AGFG2;STARD4;MBNL2;PAQR7;PRKCB;FBXO2;ENTPD5;CMC2;ZFP976;HPCAL1;PHKA1;SLC6A11;GCAT;FNDC4;DAAM1;DAAM2;HSBP1L1;KCNQ3;FAR1;MXRA7;ATP6V0D1;ATF3;PLBD2;ATF4;NECAB2;LYPD1;PDGFB;ENDOD1;TGFA;6430548M08RIK;C9ORF72;CRHR1;NKAIN2;PGS1;SEC14L2;RHOT2;FLRT2;EPB41L1;RDH11;PENK;SYNDIG1;S…
Genes Down-Regulated In Expression In Caudate Nucleus Of 12 Mon HdhQ150 HD Mice GSE32417	24/38	3.07e-12	1.99e-11	0	0	10.7431	284.801	RYR1;OSBPL8;PLK5;RGS14;CHRNA4;INSIG1;GPX6;DDIT4L;HTR1B;SLC4A11;DUSP18;NETO2;GPR6;CIART;KRT9;PDP1;RBP4;PDE10A;ABI3BP;PPP4R4;PENK;RGS11;SCN4B;S100A10
Genes Down-Regulated In Pizotifen Treated STHdhQ111 Vs Control GSE129143	206/938	3.21e-12	2.08e-11	0	0	1.80998	47.9018	WIPF2;HDAC11;DCAF8;ZFP606;DCAF5;NUDT4;NDST1;SAMD14;RASSF3;PTGFRN;DYNC2H1;MCCC2;RBFOX2;LIMCH1;FBXO2;CIRBP;ZFP618;MTURN;BCR;TIAM2;ADCY9;MAP1A;SIK3;MAML3;RNF122;FLII;MGST3;SDC3;FIGNL2;ZBTB4;PPL;SEC14L1;EPB41L1;PCBP4;TSPAN5;TNRC18;RAB11FIP4;ST3GAL2;S100A10;BBS2;STAT5A;SETD1B;PBX2;PARVA;HSPA12A;PHC3;DCLK1;GLUD1;MEX3A;ZFP512B;SFXN3;UNC119;CALM3;PTPRS;HIP1;C2CD3;AKAP13;NHSL2;DSTYK;FAM102B;TMEM44;NNT;TCT…
Genes Up-Regulated In Genes Changed In HDACi 106 Vs Vehicle Treated Healthy Donor Blood Cells GSE30933	344/1762	3.21e-12	2.08e-11	0	0	1.58042	41.8241	CYFIP2;SPON1;PATJ;PID1;SERPINE2;RAPH1;ADARB1;FNBP1L;RPS6KA3;PCMT1;SAMD14;CNST;DPYSL4;RASSF3;PPP4R4;4921524J17RIK;DPYSL3;NIPAL3;HABP4;PKNOX1;IER5;FBXO9;ACVR1;HES6;MED1;RBFOX2;PRKCB;KRT2;METTL2;ZFP976;ACSL4;GCAT;MTURN;EML4;HECW2;MXRA7;RNF122;SF1;BEX3;SAR1A;ANAPC16;IGSF3;EPB41;TGFA;NEDD4L;HNRNPLL;ZBTB4;HIF1A;GMCL1;RIC8B;RDH11;TSPAN5;N4BP2;LHPP;RAB11FIP5;JAG2;EGR1;NDFIP2;NDFIP1;JUP;TMEM74B;CADM1;H3F3…
Genes Up-Regulated In Friedreich Ataxia iPSCs Expression Vs HES-2 Cell Line GSE22651	573/3217	3.27e-12	2.11e-11	0	0	1.43804	38.0309	CYFIP2;TLNRD1;ACCS;FNBP1L;GLE1;NDST1;AI593442;DPYSL3;WDR91;LIPG;HOMER3;IER5;ZFP286;STARD7;MRTFA;SOX11;WDR73;BCR;GPR162;DAAM1;ORAI3;MAP1A;RBP1;SPIN2C;ASPHD2;RABL2;PLBD2;VPS28;SF1;CTBP1;FIGNL2;AGAP3;MRPL12;PRDM10;TRP53RKA;FAM171A1;RHOT2;FAM124A;FLRT2;HLCS;EPB41L1;FLRT3;1110051M20RIK;SYNDIG1;S100A13;JAG2;FZD1;CREBBP;JUP;CADM1;NEBL;GTF2IRD2;SETD1B;LRBA;NR2F1;THAP12;NETO2;WDR54;GPR137C;SQLE;UCK2;CPEB1…
Genes Down-Regulated In Expression In Ctip2 Null Vs WT Mouse Striatum GSE9330	102/372	3.29e-12	2.11e-11	0	0	2.40042	63.4706	RAB3C;CHRM1;SERPINE2;PLXND1;ICAM5;CXCL14;ZFYVE28;LAMP5;SYNPR;DACH1;ARHGDIB;CAR11;MBNL2;DGAT2;ACTN2;ZFP3;TBC1D2B;WDR73;LEMD1;CARHSP1;SELENOM;RIN1;NGEF;GRB7;FBLIM1;KLHL15;TGFA;RASAL1;RASGRP2;ACTR3B;STRIP2;DRD1;BRINP3;S100A10;SMAD3;ARPP21;BCL11B;NEBL;PLK2;HTR1B;FBXO32;DIAPH2;SYNDIG1L;MYO5B;STK26;CCDC88C;PPP1R1B;GPR26;MOCS3;MCUB;PINX1;DMKN;ATP5G1;NRGN;GPI1;HEBP1;ADAMTS2;DBP;CAMKV;PRMT8;AMN;GPX1;TESC;…
Genes Changed In Human Granule Cells Vs Basket Cells GSE101912	252/1209	4.15e-12	2.67e-11	0	0	1.70099	44.5779	PNMT;WDSUB1;GDE1;DCAF8;TEX47;STMN4;ADARB2;SLC4A4;PTPDC1;GLDN;SAMD14;MCIDAS;PPP4R4;LIPG;WDR91;HOMER3;EPHB2;SAMD10;AGFG2;EPHA4;FBXO2;ISLR2;WDR73;DKK2;EML5;CARHSP1;TRIM17;DAAM2;ADGRB1;SPATA13;MAP1A;ORAI2;KCTD12;CCNO;IGSF3;PCDH10;TMTC1;NKAIN2;FLRT3;KCNN2;EGR4;ARPP21;NEBL;GTF2IRD2;IQSEC3;PBX2;L1CAM;DCLK1;GDF7;NET1;CCDC88B;PKIB;GJB3;ZFAT;PPP1R1B;CALM3;GALNTL6;FANK1;PTPRQ;PTPRO;PCSK9;SIPA1L3;ABCC12;LRRC…
Glutamatergic Neuron Gene Module 1 PMID19638972	98/354	4.76e-12	3.05e-11	0	0	2.43078	63.3731	WWC1;ICAM5;ETS2;RGS4;SYNPR;COTL1;SLC12A6;IER5;DGAT2;TPM1;CIRBP;PHKA1;FOXP1;ADCY9;FRMD6;RIN1;SKAP2;ZFP467;TMEM121B;PDGFB;NEDD4L;6430548M08RIK;AK4;RASAL1;AK5;KLHL13;LTBP3;GMCL1;KIF3A;SNTG1;NTSR2;ABCA1;SYT5;ZBTB18;PRNP;ARPP21;EGR4;H3F3B;RASL10A;COPRS;DIAPH2;P4HA1;GKAP1;RIOX2;UNC119;PAM;FGF11;ACHE;PTPRO;BRK1;GRIK1;LDB2;NRGN;HEBP1;MFSD8;ENC1;ENSA;GRM8;TNFAIP8L1;SH3BGRL3;ACTR3;KLF10;TESC;ARAP2;ETV1;CYP…
Genes Down-Regulated In Expression In Forebrain Of 4 Wk SCA1 Spinocerebellar Ataxia 1 Mice GSE2867	83/282	6.66e-12	4.25e-11	0	0	2.64247	68.0032	KDM5A;RAB3C;ABCD2;LPGAT1;CCNT2;PLXND1;CITED4;PSIP1;CXCL14;PTPRF;SYNE1;LAMP5;RGS4;DBP;PRADC1;ENC1;CCL27A;SACS;NEFM;RSPO1;PCMTD1;KLF10;EPHA4;MED1;TRPC3;DUSP1;IGFBP4;STARD8;STRBP;CASK;KCTD1;EMSY;DNAJC2;ADCY9;FRMD6;CCKBR;TNNT2;KCNMA1;NUMB;FAR1;TNFRSF25;SOWAHA;RIN1;NPTXR;NGEF;JDP2;NAPA;DDX6;ZFP148;SRF;ITPR1;PTN;HNRNPLL;GDPD5;HIF1A;COL19A1;COCH;CAMKK2;RASD2;FUT8;BRINP1;RAB40B;EPB41L1;PPP1R7;CHN1;SMYD2;…
Genes Changed In Astrocytes Of HdhQ111 Vs HdhQ20 PMID32681824	58/167	6.92e-12	4.41e-11	0	0	3.3578	86.2821	DGKG;DPP10;CEP126;SNAP25;RAB3A;PTPRS;NEXMIF;FAIM2;MED16;WDR44;DOCK10;RGS4;ARHGDIB;RESP18;REV3L;STUM;COX8A;WDR37;NPY1R;DYNLL1;KRT9;EML4;CACNB2;PCP4;OLFM3;CANX;SCN4B;JCAD;SHANK1;NECAB2;INSIG1;KCNA1;SEMA3A;HPCA;AK5;PENK;EIF4H;PTCHD4;SOCS7;KCNJ3;LINGO1;ANKRD34C;ARPP21;KCNJ9;KIDINS220;PCDH7;TTC9B;GPR6;GRIN2B;SORL1;CYLD;SH3RF2;PDE10A;PPP1R1B;NECTIN4;PTPN5;CDS2;PTPN3
Genes Down-Regulated In STHdhQ7/Q7 Vs STHdhQ111/Q111 Cells Upon Heat Shock GSE38001	713/4156	7.5e-12	4.76e-11	0	0	1.38722	35.5358	CYFIP2;PID1;TLNRD1;WIPF2;RAPH1;SCX;DCAF8;SPINT2;ADARB1;DCAF5;SLC4A4;DCAF4;GPATCH8;NDST1;PCMT1;SAMD14;ZFYVE27;MSANTD1;GJA3;AKT2;ZXDB;AKT3;DPYSL3;WDR91;PWWP2A;PKNOX1;SAMD10;ZFP286;ANKS1B;MEF2A;HES6;MED1;STARD4;NHLRC3;DDX11;HPCAL1;MRTFA;B630019K06RIK;SOX11;GTPBP3;BCR;EML4;ZC2HC1C;EML5;ADCY9;DAAM1;ORAI3;ACOT2;ACOT1;ASPHD2;ATF6;NGEF;SF1;NAA60;PIF1;ANAPC16;MEAF6;PDGFB;ENDOD1;NEDD4L;WDR61;AGAP3;IQGAP2;C…
Genes Down-Regulated In The Astrocytes Of R6/2 Mice Vs WT At 1 Month Old GSE124846	146/609	7.59e-12	4.81e-11	0	0	2.01406	51.569	KCNG4;SPARC;STMN4;SLC8A2;NUDT4;ZFYVE28;PPP1CB;RGS4;AI593442;FAM162A;FAM174A;COTL1;CAR11;IER5;SCN1B;ANKS1B;PPP1R16B;KCNH4;PRKCB;IGFBP4;ACTN2;ACTN1;FIBCD1;TPM1;CCDC157;TRP73;PHKA1;SLC6A11;KRT9;CACNB3;DOK5;DOK7;GPD1;ACOT1;MXRA7;RIN1;JCAD;PFKFB3;ARL3;TMEM121B;SLC35D3;HPCA;GPR83;NDRG2;RASGRP2;ACAT2;SEC14L2;ENHO;HRH3;D5ERTD579E;PMVK;PENK;CDH22;INPP5J;GSG1L;KCNN1;DRD1;1500009C09RIK;CLSPN;N4BP3;SKIL;RAB1…
Genes Up-Regulated In Expression In SIVF020 Line NSCs Vs ESCs GSE34201	781/4613	7.99e-12	5.05e-11	0	0	1.37208	35.0606	HTR4;SAMD14;DPYSL4;PPP4R4;AKT3;LIPG;SAMD10;MEF2A;HES6;RBFOX2;HPCAL1;EML5;RFX4;ORAI2;RABL2;SF1;ATF4;SLBP;PIF1;MTMR3;MEAF6;ABCB4;PDGFB;LYPD1;AGAP3;HSPH1;D5ERTD579E;1110051M20RIK;PIP5K1B;CFAP65;VTI1B;JAG2;CREBBP;CADM1;MTERF2;NEBL;EDEM1;NR2F1;NETO2;FXYD2;FAT1;DCHS1;EZH2;LIN54;MED16;TMEM47;NHSL2;TUBA1B;SMPD1;NEFL;NEFM;2610301B20RIK;OFD1;DUSP1;METRN;ELOVL2;ELOVL6;BAZ1A;MRPL48;SIRT3;PHF20L1;MED22;SLC7A6…
Expression In Expanded CAG Repeats Vs Control ESCs After 6D Of Neuronal Differentiation GSE9760	440/2376	8.05e-12	5.07e-11	0	0	1.49107	38.0901	CYFIP2;PATJ;SERPINE2;PNMAL1;NEXMIF;STMN4;SPINT2;ADARB2;SLC4A4;COMTD1;SAMD14;LSM11;DPYSL4;DPYSL3;LIPG;PWWP2A;ZFP286;MED1;PRKCI;MBNL2;9330159F19RIK;STARD8;COL23A1;CACNA2D2;PHKA1;SOX11;RC3H2;RBP4;RBP1;ATF3;RNF122;ATF4;SKAP2;LYPD1;PDGFB;NEDD4L;AGAP3;IQGAP2;FAM149A;RIC8B;FLRT2;PCDHA1;EPB41L2;CHST15;SFN;S100A10;SLC19A2;H3F3B;NEBL;TIPARP;PLK2;LRBA;ELL2;PKIB;GJB3;DCHS1;DMRTC1A;FANK1;CDKN1A;TGFB1I1;LETM2;…
Differentially Expressed Genes In Skin Of HD Q175 Mice PMID26900923	475/2600	8.45e-12	5.31e-11	0	0	1.47047	37.4917	CYFIP2;SERPINE2;SCX;ACCS;ELK1;SAMD14;DPYSL4;MSANTD1;PPP4R4;RAVER2;SAMD10;UNC13B;IAH1;COL23A1;SCAMP1;UPB1;RBP4;DAAM1;DAAM2;HECW2;ORAI3;RBP1;ACOT1;ASTN2;ANKK1;ACOT4;ATF4;SKAP2;C9ORF72;HIF1A;ADAMTS10;ABR;PRKAR2B;PIP5K1B;RREB1;EXPH5;S100A10;SLC19A2;JAG2;ABCA1;CDK17;FZD1;WNT10A;JUP;NCAPH2;LRBA;ERLIN1;L1CAM;PKIB;CPEB1;PPP5C;ARL2BP;GJB3;NAPEPLD;UNC119;DCHS1;PLCH2;ACHE;LAD1;SRPX;ZFP367;TGFB1I1;MEI4;ARHGA…
Genes Down-Regulated In Expression In The Heart Of Mice Inducibly Expressing Celf1 For 24 H GSE56185	449/2434	8.46e-12	5.31e-11	0	0	1.48499	37.8613	CYFIP2;TLNRD1;SCX;GLE1;NDST1;DPYSL4;ZXDB;WDR91;SAMD10;HES6;IAH1;STARD8;HPCAL1;DKK2;BCR;ARMC6;ACOT2;ACOT1;PLBD2;VPS28;RNF122;MTMR3;CTBP2;PDGFB;ENDOD1;ADAMTS10;FAM171A1;EPB41L1;1110051M20RIK;LDHD;CHST15;SLC19A1;JAG2;PLK3;ACD;JUP;GTF2IRD2;NR2F1;NR1D1;CPEB1;GPR180;ACHE;TGFB1I1;KDM8;BHLHE41;PYGL;MED16;SHD;LETM2;MMP23;C1QTNF4;C77080;PANX2;TUBA1B;UBL3;SMPD1;ENSA;TRIM3;GPR137;DUSP1;METRN;IFNGR2;DENND2A;W…
Genes Up-Regulated In Sst/Npy-expressing Interneurons Of zQ175DN Vs WT PMID32681824	105/393	8.86e-12	5.54e-11	0	0	2.31673	58.9609	DGKG;RAB3B;CPNE8;DGKB;WWC1;RORA;ADARB1;HS6ST3;IGF1R;BASP1;RPS6KA2;TBC1D30;LGALS8;AGFG2;RGS7;EPM2A;KIRREL3;EPHA6;FBXW8;CASK;SYTL5;TMEM130;FOXP1;KCTD8;OLFM2;TLN2;KCTD16;NTM;ANKRD12;ITPR1;CACNA1E;ADAMTS10;GRK3;PCSK1N;RIC8B;ATXN1;NKAIN3;HLCS;SNTG1;ZMAT4;ERI3;PLXNA4;IQSEC3;RANBP17;GRIN2B;GULP1;REEP1;CPEB1;DIAPH2;GIPC2;PI4KA;GRB2;GALNTL6;CNTN4;MAP3K13;C2CD5;KDM5C;MCTP1;C2CD3;TENM4;MTCL1;ZC3H6;SIPA1L3;G…
Interneuron-enriched Genes PMID25700174	98/358	9.69e-12	6.05e-11	0	0	2.39282	60.6812	RAB3B;OXTR;CIB2;FAIM2;GLDN;RXFP3;SYNPR;SAMD14;ADGRA1;DPYSL4;RESP18;STK32A;SAMD10;KCNH2;SEMA6C;AGTPBP1;B630019K06RIK;ZFP618;SHISA9;KRT73;KCTD8;ARMCX4;RBP4;SLC9A7;SLC27A2;NECAB2;IGSF3;SLC35D3;SLC1A6;RACGAP1;EPB41L1;FLRT3;ISOC1;RAB6A;PLXNA3;PPP1R26;KLHDC2;OSBPL8;TMEM132E;GFPT2;SNHG4;COPRS;TRMT9B;SYNDIG1L;GIPC2;MAGED2;PAM;PRRT4;SP9;FGF11;CDS2;ACHE;DIRAS1;PTPRO;HMGB3;GRIK1;ELFN1;SHD;WDR6;SCN5A;KCND3;I…
Genes Changed In Pizotifen Treated STHdhQ111 Vs Control GSE129143	367/1920	1e-11	6.25e-11	0	0	1.54097	39.0253	CPNE8;CMAS;WIPF2;HDAC11;PPAN;DCAF8;ZFP606;DCAF5;NUDT4;NDST1;SAMD14;ZFYVE27;RASSF3;LIPG;PTGFRN;DYNC2H1;MCCC2;STARD4;RBFOX2;LIMCH1;FBXO2;ALG5;CIRBP;ACSL4;ZFP618;ALG1;MTURN;BCR;TIAM2;ADCY9;SUB1;MAP1A;RRAGD;SIK3;ACOT2;FAR1;TRIB3;KDELR2;FAR2;MAML3;ATF6;ATF3;RNF122;ATF4;SAR1A;FLII;MGST3;SDC3;FIGNL2;ZBTB4;PPL;C9ORF72;SEC14L1;PRRC1;EPB41L1;RDH11;PCBP4;STC2;NEU1;SARAF;TSPAN5;TNRC18;ST3GAL2;RAB11FIP4;PCK2;…
Up-regulated Genes In Gonadal Adipose Tissue Of 6 Mon HD Q175 Mice Vs WT GSE76752	631/3618	1.02e-11	6.32e-11	0	0	1.40589	35.5849	CYFIP2;PATJ;NEXMIF;WIPF3;RAPH1;SPINT2;ADARB1;FNBP1L;SLC4A4;GPATCH8;NDST1;SAMD14;ZXDB;AKT3;DPYSL3;WDR91;STMN1;SAMD10;MEF2A;UNC13B;MED1;STARD4;MBNL2;NHLRC3;PRKCB;DDX11;STARD8;COL23A1;CACNA2D2;MRTFA;PHKA1;SYTL5;BCR;EML4;GPR162;GPR165;ADCY9;DAAM1;DAAM2;HECW2;MAP1A;ORAI2;ACOT1;FAR1;FAR2;MAML3;ATF6;NGEF;SF1;MTMR3;CHIA1;IQGAP2;ADAMTS10;FAM171A1;ABR;HLCS;CFAP69;GSG1L;PIP5K1B;EXPH5;JAG2;ABCA1;PRPF38B;NEBL…
Expression In Cortex Of 5 Mon R6/2 HD Mice GSE26317	149/629	1.2e-11	7.46e-11	0	0	1.9829	49.8553	SLC23A3;TLNRD1;SLC4A4;CXCL14;SAMD14;AI593442;AKT2;SLC16A6;CAR11;LGALS8;LZTS3;KCNH3;STARD4;IAH1;RBFOX2;PAQR7;PRKCB;STARD7;IGFBP4;STARD8;FST;SLC6A15;SARS;KCTD1;CSNK1D;SLC6A11;CDYL;LEMD1;ADCY9;OBSCN;SNORC;SLC9A9;ADGRB1;ACOT2;MXRA7;1700016K19RIK;NECAB3;PDGFB;GPR83;ACAT2;SEC14L2;NEU3;STRIP1;SEC14L1;HRH3;CYP11A1;RHPN1;KCNN1;OTOF;N4BP3;DRD4;ZBTB7C;NTSR2;CBX8;CREBBP;PLK5;ARPP21;RASL10A;FAM78A;GFPT2;UQCC1…
Genes Up-Regulated In Genes Changed In HDACi 106 Treated Vs Untreated Healthy Donor Blood Cells GSE30933	345/1786	1.21e-11	7.46e-11	0	0	1.55809	39.1701	CYFIP2;SPON1;PATJ;PID1;SERPINE2;RAPH1;ADARB1;FNBP1L;RPS6KA3;PCMT1;FRAT1;SAMD14;CNST;DPYSL4;PPP4R4;4921524J17RIK;DPYSL3;NIPAL3;STMN1;HABP4;PKNOX1;IER5;FBXO9;ZFP286;ACVR1;HES6;RBFOX2;PRKCB;FBXO2;KRT2;GCAT;MTURN;GTPBP3;THAP1;EML4;TIAM1;HECW2;SIK3;MXRA7;RNF122;SF1;BEX3;ANAPC16;IGSF3;EPB41;PNP2;TGFA;NEDD4L;HIF1A;GMCL1;DGUOK;CHTF8;RIC8B;TSPAN5;N4BP2;RAB11FIP5;JAG2;EGR1;NDFIP2;NDFIP1;JUP;TMEM74B;CADM1;H…
Differentially Expressed Soluble Proteins In Cerebral Cortex Of 8 Wk R6/2 Mice PXD004973	307/1553	1.26e-11	7.77e-11	0	0	1.59823	40.1112	WDSUB1;SERPINE2;RPL31;CPNE7;PPP2R2A;ICAM5;HS6ST2;RPS16;DPYSL4;PSMD5;WDR91;STMN1;DPF1;DAG1;HABP4;EPHB2;PDK1;ANKS1B;MEF2A;EPHA4;ATP6V1G2;ACTN2;ACTN1;CMC2;PHKA1;ACSL4;SCAMP1;GPR162;CARHSP1;CSNK2B;MAP1A;SIK3;VDAC2;NGEF;SF1;IGSF8;NECAB3;SAR1A;CTBP2;CTBP1;PNP2;SDC3;6430548M08RIK;TMTC1;AGAP3;HNRNPLL;MRPL12;FAM171A1;DGUOK;COMMD9;EPB41L1;D5ERTD579E;NEU1;GSG1L;OTOF;VTI1B;RAB11FIP5;S100A10;VAT1;ABCA1;FZD1;L…
Genes Changed In Pvalb/Th-expressing Interneurons Of zQ175DN Vs WT PMID32681824	97/355	1.39e-11	8.53e-11	0	0	2.38615	59.6582	DGKG;CCNT2;ATP8A1;WIPF3;SLC4A4;HS6ST3;DOCK10;EPHA6;ARL15;LIMCH1;RALGAPA2;HPCAL1;BCR;TIAM1;OLFM2;KCNQ3;SIK3;TLN2;ASTN2;DGKI;CEMIP;SHC3;CTTNBP2;NTM;GPR83;NKAIN2;NKAIN3;BRINP1;FLRT2;CDH20;1110051M20RIK;PENK;CAMTA1;OSBPL8;TCAF1;IQSEC3;TMEM196;GNAO1;PTPRD;LRCH1;MAP3K13;PAM;SNAP25;HIP1;MCTP1;CELF1;AFF4;RYR3;SYNE1;TRIM9;SPRED2;SPRED1;REV3L;JARID2;ERC2;ZFP280D;KCND2;ELOVL6;ETV1;KSR2;MYRIP;ETV5;SFPQ;TBC1D…
Genes Changed In Non-Induced PC12 Cells Vs Induced Q74 PC12 Cells Both Treated With Vehicle GSE119557	398/2120	1.5e-11	9.22e-11	0	0	1.51036	37.6397	EMC10;ALKBH6;ELK1;ZDBF2;GCSH;PCMT1;CNST;PSMD5;DPYSL3;PKNOX1;SAMD10;RNF138RT1;IAH1;PHKA1;EML4;EML5;RBP4;ORAI3;FAR1;MAML3;ATF6;PLBD2;SLBP;NAA60;CTBP2;WDR61;TAPBPL;DEDD2;XKRX;FAM171A1;PIP5K1A;PIP5K1B;VTI1B;PLK3;CADM1;PHC3;GPR137C;HNRNPM;MEX3A;RNF103;GPR180;SFXN4;GSTM6;PIGS;PHF1;BHLHE41;PYGL;MED16;SHB;LYST;SMG5;LRRC1;PANX2;TRIM9;HEY1;AIFM2;TCTN3;SMPD1;GPR137;ZFP365;GPRASP2;PCMTD1;DUSP1;KCND3;DENND2A;…
Genes Up-Regulated In Cerebellum Of 12 Week Old Atxn1[154Q/2Q] Vs WT GSE122099	194/884	1.52e-11	9.33e-11	0	0	1.80446	44.9429	SPON1;FAAH;IKZF5;ZFYVE28;SYNPR;SAMD14;DPYSL4;TUNAR;EPHB2;STARD4;PRKCI;ZFP3;SLC6A15;RSAD1;TIAM2;SFRP4;HECW2;XRN2;MAML3;RNF122;LRPAP1;CTBP2;TMEM63C;IQGAP2;NYAP2;PPL;MBTD1;DHX32;PRRC1;FLRT3;N4BP3;CREBBP;RABGAP1L;CADM1;H3F3B;GTF2IRD2;NR2F1;DELE1;PARVA;PKIB;UCK2;STAG1;ZFP512B;EZH2;HRK;PHF2;HIP1;LPCAT1;RYR3;WDR44;AKAP12;EPB41L4B;MED13;REV3L;MUC15;LYNX1;PARP4;NCOA6;ELOVL2;TESC;KREMEN1;SYP;ZFX;PHF20L1;SL…
Expression In PC12 Cells With nonSUMOylatable AR112Q (KRKR) Upon Ligand Stimulation GSE50383	84/291	1.53e-11	9.33e-11	0	0	2.5707	64.0204	TLNRD1;UXS1;ZFAND5;CELF3;ADARB1;PTPRF;ETS2;LRRC1;SLC8A2;RGS4;GOLGA4;LSM11;HEY1;PSMD5;SESN1;BTRC;STK32A;SLC18A3;BOK;LMO1;KLF10;DUSP1;NPY1R;ANO6;ARFGAP3;MYT1;RHOB;ENAH;ERN1;DISP3;SLC7A6;DAAM1;DGKQ;KCNMA1;KCNQ3;SGK3;KCTD16;ARL8B;DGKH;HCN4;ADCYAP1R1;CEBPB;CHRNA7;MESD;SRM;DNAJB1;BRINP2;FUT8;ABLIM2;HRH3;OLFML3;CLMN;NEU1;CDH22;PLXNA1;KCNN3;STX3;SCN3B;ANKRD50;ZSWIM5;TBC1D16;CCDC134;TUB;CADM1;FAM78A;TIPAR…
Genes Up-Regulated In Friedreich Ataxia iPSCs Expression Vs IMR90 Cell Line GSE22651	712/4164	1.55e-11	9.45e-11	0	0	1.38009	34.3498	PID1;TLNRD1;TMEM200A;RAPH1;ADARB1;ACCS;ELK1;SLC4A4;GLE1;NDST1;SAMD14;DPYSL4;AI593442;GJA3;AKT2;WDR91;HOMER3;MPV17;PKNOX1;IER5;MEF2A;MBNL2;RBFOX2;IAH1;FIBCD1;HPCAL1;MRTFA;EML5;GPR162;ADCY9;DAAM2;ORAI3;MAP1A;RBP1;ACOT2;ACOT1;RABL2;ATF6;ACOT5;PLBD2;VPS28;SKAP2;ACOT3;MTMR3;MEAF6;TARSL2;CTBP1;FLII;LYPD1;ENDOD1;AGAP3;TAPBPL;HIF1A;TRP53RKA;FAM171A1;ABR;FLRT2;HLCS;EPB41L2;1110051M20RIK;S100A13;VPS16;S100…
Expression In Friedreich Ataxia And Normal iPSCs-derived Neurons Vs Fetal Human Tissues GSE65399	817/4871	1.62e-11	9.8e-11	0	0	1.35883	33.7648	NEXMIF;SPINT2;ACCS;SAMD14;DPYSL4;DPYSL3;LIPG;ZFP286;HES6;RBFOX2;STARD8;CACNA2D2;SCAMP1;FRS3;UPB1;RBP4;RBP1;ASPHD2;RABL2;ATF3;SKAP2;ATF4;SLBP;MEAF6;LYPD1;FIGNL2;AGAP3;TAPBPL;IQGAP2;C7;EPB41L2;D5ERTD579E;1110051M20RIK;ABCA1;CREBBP;JUP;LRBA;NR2F1;NETO2;L1CAM;PKIB;UCK2;FXYD2;NAPEPLD;SFXN4;GSTM6;EZH2;HRK;SRPX;LAD1;ARHGAP1;SHD;MMP23;SMPD3;JPH4;TMEM47;PANX2;TUBA1B;NEFL;NEFM;PCMTD1;3110082I17RIK;ARG2;KCN…
Mouse Cerebellum Unipolar Brush Cell Markers PMID19013282	142/593	1.62e-11	9.8e-11	0	0	2.00938	49.9292	DGKG;RAB3B;POP5;MTCH1;RIPOR2;PATJ;UBXN2B;DGKB;1700001L19RIK;CIB2;ADARB1;HTR4;DCAF4;RGS4;COMTD1;DACH1;AI593442;GM3558;STMN1;RESP18;HABP4;FBXO9;KCNH2;RNF138RT1;CPA2;CDYL;LEMD1;SLC9A2;OBSCN;GM3667;NHP2;LY6H;ATF3;ISCU;LRPAP1;ARHGEF25;INSIG1;HPCA;PCDH15;AK5;KLHL13;KLC1;PLCXD1;FAM149A;TRP53I11;PCSK1N;SNTG2;FAM124A;BAG2;DDRGK1;EPB41L2;ISOC1;GSG1L;KCNN1;SCN3A;ZBED5;RAI2;TRPM4;SYT5;ACD;WNT10A;ANKRD24;OSBP…
Genes Changed In Cerebellum Of 18 Week Old Atxn 1 154Q/2Q Mice Treated With ASO Vs Vehicle GSE114674	175/777	1.74e-11	1.05e-10	0	0	1.86188	46.1259	CPNE9;CYFIP2;DGKG;CPNE8;SH3GL3;LPGAT1;TLNRD1;COL16A1;SERPINE2;IRS1;RORA;FAIM2;MTFR1L;RGS4;DOCK10;BASP1;DPYSL3;AGFG2;TLE4;CHRNB2;ATP6V1G2;WSB2;PPTC7;IGFBP3;USP3;CACNA2D2;SLC6A11;LMO7;MFSD12;MTURN;RNF41;CACNB2;CARHSP1;RRAGD;ORAI2;PKP2;KCNQ3;MXRA7;NPTXR;ASTN2;NGEF;ATF4;FCOR;ADCYAP1R1;DIPK1B;ZFP346;PCDH10;CTTNBP2;ARHGEF28;HVCN1;TMEM59L;ENDOD1;GPR83;ABHD6;RASGRP2;NKAIN2;ARHGAP20;BAG5;MAN2A2;FLRT3;ZMAT…
Genes Down-Regulated In Loxapine Treated STHdhQ111 Vs Control GSE129143	274/1359	2.08e-11	1.25e-10	0	0	1.63273	40.1604	PATJ;WIPF2;HDAC11;ZFP606;DCAF5;FNBP1L;PTPDC1;NUDT4;NDST1;SAMD14;RASSF3;AKT2;OGFOD1;NIPAL3;KIF21B;PTGFRN;SLC12A6;KIFAP3;DYNC2H1;MCCC2;RBFOX2;ARL15;LIMCH1;CIRBP;MRTFA;ADGRA3;CSNK1D;CMBL;MTURN;BCR;EML4;ADCY9;ORAI3;MAP1A;ORAI2;SIK3;MAML3;TLN2;RNF122;ZBTB8A;MTMR3;EPB41;FLII;MGST3;OMA1;ZBTB4;PPL;GMCL1;SEC14L1;CHTF8;INPP5F;EPB41L1;HLCS;PCBP4;VPS8;TNRC18;RAB11FIP4;ST3GAL2;RAB11FIP5;PPP1R26;STAT5A;FZD1;LR…
Genes Up-Regulated In Foxp2/Olfm3-expressing Neurons Of zQ175DN Vs WT PMID32681824	64/198	2.13e-11	1.28e-10	0	0	3.01617	74.115	TENM1;PID1;MCTP1;THRB;GALNT16;DGKB;SLC7A14;ZBTB20;SOBP;CDH8;IGF1R;EPB41L4B;ME3;EPHA6;KCND3;MAGI3;ANO6;ATP1B1;KCTD8;0610010F05RIK;KCNMA1;ST6GALNAC3;DGKI;CDH18;SLC24A2;LRPAP1;CAMK2D;NTM;SEMA3A;PPM1H;NRXN2;TMTC1;ADCY2;CACNA1E;NKAIN2;ABR;PCSK1N;ABLIM1;2210408I21RIK;SNTG1;CCDC85A;1110051M20RIK;CAMTA1;PTCHD4;TBL1X;BRINP3;PLXNA4;ATP9A;KCNIP1;KCNB2;RANBP17;SLC4A10;LHFPL3;TMEM196;USP29;GULP1;PTPRD;MGAT4C;…
Down-regulated Genes In Cerebellum Of ATXN1[82Q] Vs WT Mice GSE108255	85/298	2.3e-11	1.38e-10	0	0	2.52808	61.9278	DGKG;DPP10;CEP126;GPR26;KCNG4;KCNC3;GPR63;RNF19B;GRIK1;RORA;DOC2B;ARMH4;ZFP385C;CNTNAP5B;FAM174B;PPP4R4;SLC16A6;HOMER3;LRRFIP1;AGFG2;ANKS1B;YWHAH;PPP1R16B;KCNH3;PRMT8;WSB2;ADPRHL1;TRPC3;TPM2;HPCAL1;ETV1;KSR2;MTSS1;ANO3;PLPP6;CACNB2;MYCL;PCP4;OLFM3;KCNMA1;CASQ2;FAR2;KCTD12;NPTXR;CCNO;PDE9A;GAS7;DGKH;NECAB3;ATL2;ITPR1;NEXN;RASAL1;SLC1A6;CACNA1G;RHOBTB2;STRIP2;HRH3;RDH11;CLMN;CHN2;CREG1;SLITRK4;SPTS…
Cortex RNA M43 Module (Ivory) PMID26900923	50/137	2.45e-11	1.47e-10	0	0	3.62063	88.4625	PLXND1;STMN4;NAGPA;GBA2;NRGN;ZFYVE28;GRM2;DBP;CAMKV;CCL27A;RSPO1;HRAS;AGFG2;SCN1B;BOK;SLC30A3;WSB2;IGFBP4;SARS;SSTR3;GCAT;SLC7A4;MVD;NAT8L;KCTD15;ATF4;CAMK2B;NAPA;LTK;NECAB3;RGS14;ARHGEF25;HPCA;CXXC5;MRM1;DDN;TMEM25;RMND5B;LDHD;KCNJ11;KCNJ9;KAZALD1;PLXDC1;PFKL;PNKD;KCNS1;CALM3;1700001O22RIK;RGS11;KCNK4
Genes Up-Regulated In dSPNs Of HD Patients Vs Control PMID32681824	101/379	2.59e-11	1.55e-10	0	0	2.30654	56.2234	MTCH1;PCDH11X;ZBTB20;FAIM2;RORA;ADARB2;UBE2Z;ELK1;GLDN;IGF1R;SESN3;BASP1;AKT3;PPFIA3;SEMA6A;LIMCH1;FOXP1;TIAM2;TIAM1;ATP6V0D1;LY6H;SKAP2;TMEM59L;TMTC1;LIN7A;AGAP3;NYAP2;SLC30A10;NDRG2;ZBTB4;ACACA;ABR;BRINP2;PCSK1N;FLRT2;HRH3;CDH20;DRD1;BRINP3;ABCA1;PRNP;CADM1;ANKRD24;AUTS2;INSR;HSPA12A;PTPRD;RALYL;PLXNB1;GALNTL6;CNTN4;TENM4;BNC2;GRIK5;PTPRF;C1QTNF4;TMEM47;CAMKV;GIT1;BOK;CERS4;CERS5;TCF12;SLC39A11…
Down-regulated Genes In Cerebellum Of HD Q175 Mice PMID26900923	233/1117	2.66e-11	1.59e-10	0	0	1.69745	41.3323	PATJ;SPARC;WIPF3;SCX;STMN4;ICAM5;ALKBH6;GCSH;AI593442;MSANTD1;STMN1;HES6;PAQR7;FBXO2;HPCAL1;SLC6A11;KRT9;TIAM1;DAAM2;ADGRB1;MXRA7;RIN1;ATF3;NGEF;PLBD2;NECAB2;TGFA;6430548M08RIK;ADAMTS10;CRHR1;NKAIN2;SEC14L2;ABR;EPB41L1;HLCS;PCBP4;1110051M20RIK;LDHD;INPP5J;GSG1L;1500009C09RIK;RAB11FIP5;NTSR2;EGR1;PLK5;JUP;GADD45B;NCAPH2;IQSEC3;PDE2A;NR1D1;HSPA12A;CPEB1;PPP5C;CYP2S1;PPP1R1B;CREBRF;SDC1;PTPRS;TMEM15…
Genes Changed In Fragile X Syndrome iPSCs Vs Fibroblasts GSE21348	521/2918	2.98e-11	1.77e-10	0	0	1.4328	34.725	CYFIP2;PATJ;WIPF2;SPINT2;FNBP1L;SLC4A4;ZDBF2;GCSH;NDST1;CNST;PPP4R4;RAVER2;AKT3;DPYSL3;LIPG;IER5;ZFP286;UNC13B;RNF138RT1;MBNL2;UNC13A;WSB2;PRKCB;DDX11;HPCAL1;CACNA2D2;PHKA1;GTPBP3;ADCY9;DAAM1;MAP1A;ORAI2;FAR2;PLBD2;PIF1;SAR1A;CTBP2;FIGNL2;TAPBPL;IQGAP2;C9ORF72;FAM124A;ADAMTS19;FLRT3;CHST15;S100A13;SFN;ZBTB7A;CDK17;FZD1;PLK3;H3F3B;TIPARP;NEBL;GTF2IRD2;LRBA;EDEM1;CDC7;NR1D1;L1CAM;ELL2;PHC3;HNRNPM;S…
Expression In HD60i.4 NSCs From HD Patient Vs NSCs From Healthy Controls GSE37517	700/4098	3.1e-11	1.84e-10	0	0	1.37578	33.2907	CYFIP2;PID1;WIPF3;SCX;ADARB1;ACCS;GCSH;MSANTD1;AKT2;PPP4R4;DPYSL3;LIPG;ZFP286;UNC13B;RNF138RT1;HES6;STARD4;IAH1;PHKA1;SOX11;SCAMP1;SYTL5;DKK2;BCR;DAAM2;RFX4;MAP1A;ACOT2;ACOT1;FAR2;MAML3;ACOT5;ATF3;RNF122;ACOT3;PNP2;ABCB4;FIGNL2;TAPBPL;IQGAP2;NYAP2;SLC30A10;C9ORF72;ADAMTS10;FAM124A;FLRT2;PRKAR2B;D5ERTD579E;CFAP69;CHST15;PIP5K1B;ST3GAL2;ZBTB7C;SLC19A2;JAG2;B3GALNT2;ABCA1;MYH7B;WNT10A;ARPP21;CADM1;T…
Expression In Caudate Nucleus Of 12 Mon HdhQ150 HD Mice GSE32417	24/41	3.15e-11	1.86e-10	0	0	8.84576	213.9	RYR1;OSBPL8;PLK5;RGS14;CHRNA4;INSIG1;GPX6;DDIT4L;HTR1B;SLC4A11;DUSP18;NETO2;GPR6;CIART;KRT9;PDP1;RBP4;PDE10A;ABI3BP;PPP4R4;PENK;RGS11;SCN4B;S100A10
Genes Down-Regulated In Expression In Striatum From 6 Wk R6/2 HD Mice GSE1980	44/113	3.17e-11	1.87e-10	0	0	4.01269	97.0044	RYR1;HLF;NTM;ATL2;ITPR1;TGFA;GPR83;KLC1;RASGRP2;DMKN;SLC4A4;FOXO1;COCH;RGS4;RASD2;HSPH1;SEC14L1;HRH3;PRADC1;PENK;CHN1;PMEPA1;IER5;GABRD;EGR1;LYNX1;ARPP21;IGFBP4;PRKCB;KCNIP2;TESC;TBC1D8;DDIT4L;PLXDC1;FOXP1;PDE10A;SLMAP;GPD1;PPP1R1B;RARB;CCM2;SHANK3;PTPN5;CDS2
Definite Neuron-Enriched Genes PMID18171944	97/360	3.28e-11	1.93e-10	0	0	2.3401	56.4894	DGKG;RAB3C;NEXMIF;ICAM5;HS6ST2;CDH8;LAMP5;RGS4;SYNPR;AI593442;GM3558;TBC1D30;CCL27A;GRB10;MLIP;UNC13A;SLC6A15;LMO7;FNDC9;TMEM130;FOXP1;PCP4;OLFM3;GM3667;LY6H;NPTXR;CEMIP;HPCA;BHLHE22;NTS;KCNV1;PCDHA1;PENK;CAMTA1;SCN3B;SCN3A;ARPP21;BCL11B;GPR12;RASL10A;SLC4A10;HTR1B;L1CAM;EFNA3;PLCXD3;CALY;MYO5B;GALNTL6;PCSK2;DPP10;ACHE;SNAP25;MCTP1;KCNK9;RASGRF2;SLC7A14;LDB2;NRGN;C1QTNF4;CAMKV;ENC1;CEP170B;NEFL;P…
Genes Up-Regulated In Friedreich Ataxia iPSCs Expression Vs SC30 Cell Line GSE22651	725/4270	3.89e-11	2.29e-10	0	0	1.36782	32.7863	PID1;SERPINE2;RAPH1;ADARB1;ACCS;ELK1;SLC4A4;NDST1;SAMD14;AI593442;AKT2;ZXDB;AKT3;WDR91;HOMER3;MPV17;IER5;MEF2A;MBNL2;RBFOX2;IAH1;HPCAL1;MRTFA;FRS3;DKK2;ADCY9;DAAM2;HECW2;ORAI3;MAP1A;ACOT2;ACOT1;RABL2;ATF6;ACOT5;PLBD2;VPS28;SKAP2;ACOT3;SLBP;LRPAP1;MEAF6;CTBP1;ABCB4;FLII;ENDOD1;AGAP3;TAPBPL;C9ORF72;HIF1A;TRP53RKA;FAM171A1;ABR;FLRT2;HLCS;1110051M20RIK;SYNDIG1;CFAP69;S100A13;ZBTB7A;RREB1;VPS16;S100A1…
Differentially Expressed Genes In Striatum Of HdhQ111 Mice GSE64478	59/178	4.08e-11	2.39e-10	0	0	3.12799	74.8265	ACVRL1;HRK;RYR1;RAB3C;GASK1B;ANKRD35;PCDH11X;MCUB;4930447C04RIK;GRM1;RGS4;TMEM267;AI593442;NNT;PPP4R4;SOX9;KRT222;FST;TPM2;GPX6;UPB1;FAHD2A;CACNB2;PCP4;ADORA2A;RTN4RL1;TNNT2;SLCO2A1;AVP;ITGA5;PLEKHO2;NPTXR;SCN4B;COL17A1;ZFP941;ITIH3;LTK;HLF;TMPRSS6;NXPH4;STC1;SEC14L3;ABI3BP;PENK;CLSPN;VILL;N4BP2;RREB1;S100A10;ZBTB18;ARPP21;KLHL1;DDIT4L;SLC4A11;NETO2;PDP1;SYT10;5031410I06RIK;FAT1
Top Neuron-Expressed Genes In Humans And Mice PMID29892006	221/1051	4.12e-11	2.41e-10	0	0	1.71235	40.9467	CYFIP2;LPGAT1;FNBP1L;PCMT1;SYNPR;RPS16;CHORDC1;STMN1;KIFAP3;ANKS1B;MEF2A;EPHA4;RBFOX2;MBNL2;PRKCB;SCAMP1;MTURN;DAAM1;SUB1;MAP1A;AKAP9;KCNQ3;VDAC2;ATP6V0D1;ADCYAP1R1;BEX2;PCDH10;MAGED1;MGST3;HSPH1;FLRT2;INPP5F;SARAF;TSPAN3;SCN3B;EGR1;RABGAP1L;NDFIP1;CADM1;ARPP21;H3F3B;PLK2;PDE2A;HSPA12A;GRIN2B;DCLK1;ZWINT;BC005537;CALM3;CALM1;PAM;CDS2;PCSK2;ZCCHC12;PTPRS;PTPRF;RYR3;TRIM9;TUBA1B;PPP3CB;UBL3;TMSB4X;…
Up-regulated Genes In HD Vs Control Fibroblast-Derived Neurons GSE84013	143/606	4.23e-11	2.47e-10	0	0	1.97042	47.0672	RAB3C;RIPOR2;GALNT13;DGKB;NPY2R;PCDH11X;GLDN;RXFP3;HS6ST3;KLRB1A;DACH1;AI593442;CNTNAP5B;NDST3;ARHGDIB;CHRNB2;GUCY1A2;MLIP;EPHA6;SKIDA1;ANKRD45;ZFP619;KCTD4;SHISA9;UPB1;CACNB2;DISP3;OLFM3;HECW2;KCTD12;NPTXR;SHC3;CTTNBP2;HPCA;LYPD1;PDGFB;TMTC1;AK5;KLHL13;NYAP2;NTS;CACNA1G;KCNV1;BRINP2;FUT8;PCSK1N;ADAMTS19;CDH20;KCNN2;1500009C09RIK;N4BP3;SRGAP1;SCN3A;SLC15A5;SYT5;ARPP21;NEBL;ANKRD22;IQSEC3;SLC4A10;…
Genes Up-Regulated In Oligodendrocytes Of HD Patients Vs Control PMID32681824	94/347	4.8e-11	2.8e-10	0	0	2.3561	55.9791	DPP10;ATP8A1;TSEN15;ZBTB20;JADE2;PPP1R9A;SOBP;SIPA1L3;CDH8;LRRC1;CEP128;IGF1R;DOCK10;ARMH4;MED13;AKT3;CHORDC1;EPHB2;BOK;KIRREL3;TLE4;CERS4;USP47;AGTPBP1;DCC;SGIP1;SLC6A15;RALGAPA2;TCF12;SLC39A11;ARAP2;LIFR;MYRIP;RANGAP1;MRPS6;FOXP1;TIAM2;ITPKB;SLC22A23;KCTD8;RAB30;TBC1D5;NCOA7;SGK3;MAML3;ST6GALNAC3;CDKL1;AMER2;CAMK2D;ANAPC16;UHRF2;ITPR1;PPM1H;PRKX;PPM1K;SLC30A10;HDAC9;COL19A1;PHF21A;NKAIN2;FAM171…
Genes Up-Regulated In R6/1 HD Mice PMID30811995	154/669	5.44e-11	3.16e-10	0	0	1.90981	45.1365	NEXMIF;TUSC1;SAT2;GLDN;ZDBF2;SAMD14;GRB10;TRIM26;FAM3C;NUDT12;MAP2K3;CAST;SEMA6C;PHYH;ANKRD45;AIP;NPY1R;B630019K06RIK;ZFP618;SHISA3;CYS1;VWA5B2;TMEM130;ARMCX4;AFG3L2;GPR165;TRIM17;CCNE1;ARMCX6;ACOT1;FKBP4;CDKL1;IGSF3;KLHL14;MRI1;SLC1A6;PPL;STIP1;STRIP1;STK33;PCSK1N;PRRC1;BAG2;RACGAP1;ADAMTS19;MAP3K20;VILL;N4BP2;BRINP3;PLXNA3;ABCA1;PPP1R26;VAT1;CBX8;KIRREL;TMEM86B;LRRN3;MAGEE2;PCDH20;GREB1;SLC35E3…
Up-regulated Genes In Hippocampus Of Foxp1 KO Vs WT Mice GSE62718	247/1209	5.78e-11	3.35e-10	0	0	1.65478	39.0106	SPON1;PATJ;SERPINE2;SCX;FNBP1L;PTPDC1;HS6ST2;ZDBF2;SOX3;SAMD14;RPS6KA2;RESP18;TRIM26;PTGFRN;SOX9;RNF138RT1;MUSK;COL23A1;CACNA2D2;B630019K06RIK;SLC6A11;ZFP618;FNDC9;SYTL5;UPB1;ZC2HC1C;GPR165;SPATA13;AKAP9;FAR2;ASTN2;ADCYAP1R1;SPTBN5;EPHA10;IGSF3;ZFP503;LYPD1;PCDH15;FAM149A;TERT;PRKAR2B;CFAP69;OTOF;KCNN3;AMZ1;N4BP2;SNX8;ZBTB7C;S100A10;PPP1R26;FZD1;VAT1;GKAP1;KLHDC8A;FAT1;CATSPERG1;TENM1;ZCCHC12;CDK…
Genes Changed In Ciliated Ependymal Cells Of R6/2 Vs WT PMID32681824	111/436	5.8e-11	3.35e-10	0	0	2.17044	51.1603	PID1;SPARC;GALNT13;SERPINE2;ATP8A1;WWC1;ZBTB20;SLC4A4;CEP128;NUDT4;SYNPR;EP300;CPNE2;BTRC;KIRREL3;EPHA4;ARL15;LIMCH1;ACTN1;SLC6A15;ATP1B1;TIAM1;PCP4;RFX4;TNIK;LY6H;NGEF;KMT2E;DDX5;CCDC148;ILDR2;MRO;IQGAP2;NKAIN2;1110051M20RIK;PENK;KCNN3;ZBTB7C;CDK17;EEFSEC;CADM1;ODF2;DENND4A;CRIM1;GULP1;PTPRD;GNAO1;ARHGAP32;LRFN5;DIAPH2;DLG2;CCDC88C;OGT;DRC3;GALK2;ITM2C;SNAP25;DOCK4;MTCL1;LDB2;CHD2;PTPRF;SYNE1;RE…
Genes Down-Regulated In Expression In Hippocampus Of 20 Wk N171-82Q HD Mice GSE44306	58/175	5.98e-11	3.45e-10	0	0	3.12675	73.6023	CPNE9;RYR1;KCNG2;LRRC10B;WIPF3;GXYLT2;HTR4;SIPA1L2;LYST;NAT14;GRM2;CNTNAP5B;ENC1;HOMER3;GIT1;LZTS3;BOK;YWHAH;KCNH3;LYNX1;DGAT2;TRPC6;SLC30A3;PRKCB;KCTD4;ANO3;DUSP7;GPD1;KCNQ3;ORAI2;ROR1;TNFRSF25;SOWAHA;RIN1;KDM7A;CABP7;IQGAP2;CAMKK1;DDN;FAM117A;RASD2;BRINP1;PENK;GABRD;CAP2;PLK5;SMAD3;LINGO3;RASL10A;KCNJ9;PLK2;ECEL1;HTR1B;BAIAP2;ARPC2;SDC1;HSPA1A;KCNK4
Expression In Striatum From 6 Wk R6/2 HD Mice GSE1980	52/149	6.79e-11	3.91e-10	0	0	3.37777	79.0822	CREBZF;RYR1;DMKN;SLC4A4;RGS4;DPYSL4;PRADC1;ARL6IP4;PMEPA1;CCNL1;IER5;LYNX1;IGFBP4;PRKCB;TESC;TBC1D8;FOXP1;TNNT2;GPD1;RARB;SHANK3;HLF;NTM;ATL2;ITPR1;TGFA;GPR83;KLC1;RASGRP2;FOXO1;COCH;RASD2;HSPH1;SEC14L1;HRH3;TCEAL3;PENK;CHN1;ZSWIM7;GABRD;EGR1;ARPP21;KCNIP2;DDIT4L;PLXDC1;PDE10A;SLMAP;PPP1R1B;CCM2;PTPN5;CDS2;MAD2L1
Genes Down-Regulated In Influence Of Hsp90 Inhibitor On Expression In WT Mice GSE29681	337/1761	7.05e-11	4.05e-10	0	0	1.53672	35.9214	PATJ;RPL31;WIPF3;A430005L14RIK;GBA2;PCMT1;DPYSL3;NDST3;MPV17;FBXO9;STARD4;PAQR7;WSB2;PRKCB;STARD8;CMC2;COL23A1;MRTFA;ACSL5;PHKA1;SOX11;MFSD12;GTPBP3;ZC2HC1C;TIAM1;AFG3L2;PLPP6;ADCY9;ARMC6;ORAI3;SPATA13;MXRA7;RIN1;SLBP;PCDH10;MGST3;ZFP503;ENDOD1;WDR61;OMA1;SMIM7;STRIP2;FLRT2;LDHD;RRS1;KCNN1;DYM;KCNN2;SNX7;ZBED5;RAB11FIP5;S100A10;B3GALNT2;TMEM74B;DNAH17;TIPARP;FAM78A;EDEM1;LRBA;THAP12;DDIT4L;CDC7;N…
Genes Up-Regulated In Microglial Cells Of HD Patients Vs Control PMID32681824	114/454	7.97e-11	4.57e-10	0	0	2.13127	49.5569	SPON1;UBXN2B;FAM13A;ZBTB20;JADE2;IGF1R;PPP1CB;AKT3;SLC16A3;MBNL2;PRKCB;RALGAPA2;FOXP1;SIK3;PFKFB3;ANAPC16;CTBP2;CTTNBP2;ITPR1;ZBTB1;NEDD4L;6430548M08RIK;AGAP3;IQGAP2;SLC30A10;HIF1A;PHF21A;ABR;STIP1;GRK3;HSPH1;ATXN1;MAN2A1;CHST15;PGK1;MAP7;SARAF;TNRC18;RREB1;SRGAP1;ST3GAL2;TBC1D16;ABCA1;CREBBP;CADM1;INSR;RAB27A;ELL2;PTPRD;CLK1;SLC6A6;P4HA1;BCL2;CREBRF;DPP10;DOCK4;HIP1;MCTP1;THRB;BNC2;GBE1;ARRB2;SI…
Genes Up-Regulated In Expression In Cerebellum Of 10 Wk N171-82Q HD Mice GSE44306	207/976	8.05e-11	4.6e-10	0	0	1.72805	40.1652	WDSUB1;RPL31;NEXMIF;FNBP1L;GPATCH8;IKZF5;HS6ST3;SYNPR;SAMD14;DPYSL3;RAVER2;WDR91;ARL6IP4;CCNL1;IER5;ZFP286;PDK1;ARL10;UNC13B;EPHA6;SLC6A15;CIRBP;ACSL5;ADGRA3;SOX11;EBF4;SCAMP1;SFRP4;ADGRB2;XRN2;LRPAP1;ADCYAP1R1;IGSF3;INTU;PCDH10;NYAP2;FAM149A;CFAP69;SCN3B;SNX8;PPP1R26;TMEM86B;XRCC4;GTF2IRD2;RANBP17;NR2F1;PARVA;ELL2;ZWINT;SQLE;GKAP1;PCDHB6;PCDHB5;UNC119;DCHS1;MAGED2;GALNTL6;RSPH3A;ZFP367;CETN2;GRI…
Differentially Expressed Proteins In The Cortex Of R6/2 Vs WT PXD008099	63/199	8.17e-11	4.66e-10	0	0	2.92396	67.9176	ANKRD13D;KCNC3;RASGRF2;HAPLN4;AKAP12;LAMP5;GRM2;SPR;DLGAP2;GPRASP2;LZTS3;HMGCS1;PRKCB;ACTN1;GAA;LMO7;APRT;ACAP2;GPD1;ASTN2;RIN1;UMPS;NPTXR;SCN4B;NGEF;NECAB2;MTPN;RGS14;KCNA1;GLO1;ITPR1;MRI1;AK5;RASGRP2;CAMKK1;CAMKK2;DNAJB1;BRINP2;PCSK1N;ABLIM2;LDHD;GSG1L;LRRC8D;RGS20;CACNG3;GRIA3;LINGO1;SEMA4A;SYT2;SGTB;CCDC136;PDE2A;SLC4A10;FBXL16;L1CAM;BAIAP2;SPATA2L;PDE10A;SYT12;LPCAT4;PPP1R1B;PTPN5;HSPA1A
Influence Of Hdac4 Reduction On Expression In 15 Wk WT Mice GSE38219	561/3198	8.48e-11	4.83e-10	0	0	1.40467	32.5749	WIPF2;NEXMIF;DCAF8;EMC10;ADARB1;ADARB2;SLC4A4;PTPDC1;GLE1;NDST1;ZFYVE27;4921524J17RIK;AKT3;LIPG;MPV17;PKNOX1;IER5;MED1;MBNL2;IAH1;WSB2;PRKCB;CACNA2D2;SCAMP1;RC3H2;GTPBP3;GPR162;ARMC6;HECW2;ORAI2;SKAP2;MTMR3;MEAF6;NEDD4L;TAPBPL;HIF1A;PCDHA1;EPB41L2;D5ERTD579E;CFAP69;CHST15;RREB1;ST3GAL2;SLC19A2;FZD1;MYH7B;CREBBP;PRPF38B;NDFIP1;GTF2IRD2;SETD1B;THAP12;PBX2;NETO2;NR2F6;CYLD;GLUD1;UCK2;RNF103;ARL2BP;S…
Genes Up-Regulated In HD Markers In NSCs GSE74201	85/305	8.51e-11	4.83e-10	0	0	2.44663	56.7308	HRK;RYR1;CPNE8;TENM1;CCDC126;KCNC3;RASGRF2;ADARB2;COMT;CNTNAP5B;NDST3;SIX3;ITGB8;BOK;GUCY1A2;MLIP;SLC30A3;HMGCS1;DCC;ZFP3;ELOVL2;ARAP2;SLC6A11;TEX15;MYRIP;ANO4;THNSL2;DKK2;ANO2;ZC2HC1C;BDH1;RTN4RL1;ADAM12;ACOT2;PKP2;ACOT1;SMPDL3B;ACOT5;SLC27A2;ACOT4;JDP2;RAPSN;ACOT3;HBEGF;SLC24A2;BEX2;SLC24A3;KLHL14;NXPH4;NEXN;WNT8B;SELENOI;ZFP804B;FAM124A;HRH3;FAM184A;SNTG1;CAMK2N2;XIRP1;DRD1;MSC;WNT1;BEND7;TMEM…
Genes Changed In Cerebellum Of 29 Week Old fxSCA7 92Q Mice Vs WT GSE139090	108/423	8.77e-11	4.97e-10	0	0	2.17765	50.4274	CPNE9;CEP126;TLNRD1;KCNG4;LPGAT1;GPR63;RNF19B;RORA;CNTNAP5B;FAM174B;PPP4R4;HOMER3;ANKRD13A;SCN1B;ANKS1B;PPP1R16B;WSB2;PPTC7;HPCAL1;CIRBP;CACNA2D2;PLPP6;PCP4;SPATA13;FAR2;KCTD12;NPTXR;PDE9A;DGKH;CABP7;CTTNBP2;ITPR1;AK4;SLC1A6;CRHR1;RHOBTB2;CACNA1G;STRIP2;ARHGAP20;RDH11;SYNDIG1;IGFBP6;RREB1;GRIA3;LHPP;ABCA1;PLK5;EGR4;AUTS2;NEK6;PCDH20;HTR1B;NSG1;GNAO1;DLG2;ZFP512B;FGF11;TUBA8;HRK;DPP10;RYR1;SNAP25;…
Genes Changed In hESCs After ATF7IP Knock Down GSE118088	266/1329	9.29e-11	5.25e-10	0	0	1.61489	37.3033	SPON1;LPGAT1;NEXMIF;STMN4;HS6ST2;RPS6KA3;SOX3;FRAT1;DPF1;SOX9;PDK1;MBNL2;ZFP3;RFX4;FAR2;IGSF8;BEX2;ZFP503;LYPD1;PDGFB;FAM149A;FLRT3;CHST15;MAP7;KCNN2;TNRC18;PCK2;S100A10;FZD1;EGR1;RABGAP1L;CADM1;GADD45B;PLK2;INSR;GREB1;NR2F1;POU6F2;PARP16;GDF7;KLHDC8A;CYP2S1;PCDHB6;CREBRF;PLCH2;ANP32B;LAD1;GASK1B;ZCCHC12;LRRC10B;KCNC3;DIRAS1;PHF1;PCSK9;SIPA1L2;LYST;SHD;PTPRF;MEDAG;SMPD3;HEY1;AIFM2;SMPD1;ENC1;NEFL…
Genes Up-Regulated In Friedreich Ataxia iPSCs Expression Vs Control Urinary Bladder GSE22651	778/4648	1.04e-10	5.85e-10	0	0	1.34752	30.9768	PID1;SPINT2;ACCS;LSM11;MRTFA;SCAMP1;ORAI3;FAR1;RABL2;ATF6;PLBD2;ATF3;SKAP2;SF1;MTMR3;MEAF6;TARSL2;AGAP3;TAPBPL;C7;HLCS;EPB41L1;SFN;EXPH5;ZBTB7C;JAG2;ABCA1;CREBBP;JUP;TIPARP;LRBA;EDEM1;NR2F1;GSTM6;PIGS;SRPX;LAD1;BHLHE41;ARHGAP1;SHB;MED16;LRRC1;TMEM47;HEY1;SMPD1;SH3BGRL3;JAK2;PCMTD1;DUSP1;SLC39A11;BAZ1A;SLC7A4;PHF20L1;SLC7A8;CDC42EP3;KCNMA1;ADSSL1;ERGIC3;LRRC3B;SAMD5;SYNPO2;CIPC;PELI2;KCNA5;PTGS1;R…
Genes Up-Regulated In OPCs Of HD Patients Vs Control PMID32681824	106/414	1.1e-10	6.18e-10	0	0	2.18516	50.1098	DGKG;GALNT13;ATP8A1;DGKB;FAM13A;ZBTB20;RORA;IGF1R;DOCK10;AKT3;CHORDC1;STK32A;MBNL2;COL27A1;LIFR;FOXP1;BCR;TIAM2;KCTD8;TIAM1;MAP1A;SLC9A9;SIK3;CDKL1;SPTBN4;SLC30A10;NDRG2;PHF21A;ACACA;ABR;HSPH1;ATXN1;FLRT2;CDH20;MAN2A1;SNTG1;GSG1L;TSPAN5;SRGAP1;BPTF;CREBBP;ARPP21;CADM1;CRADD;INSR;PTPRE;P4HA1;UST;CNTN3;OSBPL1A;DPP10;DOCK4;HIP1;PTPRS;TENM4;GRIK1;CHD2;SIPA1L3;LRRC1;SYNE1;ENSA;PHACTR3;CERS4;KCND2;SGIP…
Insoluble Brain Proteome Of WT And HD R6/2 Mice PMID29166617	274/1380	1.13e-10	6.36e-10	0	0	1.59964	36.6336	CYFIP2;LPGAT1;RPL31;RAPH1;DCAF5;SLC4A4;GPATCH8;RPS16;DPYSL4;PPP4R4;DPYSL3;STMN1;ARL6IP4;ANKS1B;ATP6V1G2;UNC13A;PRKCB;AP1B1;CSNK1D;BCR;TIAM1;ADCY9;DAAM1;SUB1;HECW2;MAP1A;AKAP9;KCNQ3;SIK3;VDAC2;TLN2;RIN1;UBA52;KCTD16;IGSF8;SPTBN4;TARSL2;EPB41;FLII;ENDOD1;6430548M08RIK;HNRNPLL;ABR;HSPH1;INPP5F;EPB41L1;PRKAR2B;EPB41L2;PCBP1;INPP5J;RAB11FIP5;FIS1;PRPF38B;ZFP638;IQSEC3;HSPA12A;GRIN2B;DCLK1;GLUD1;HNRNPM…
OPC1b Oligodendrocyte Precursor Cell-Enriched Genes PMID30078729	559/3191	1.17e-10	6.56e-10	0	0	1.40154	32.0507	CYFIP2;TRIR;PID1;SERPINE2;RPL31;RAPH1;DCAF8;EMC10;STMN4;GPATCH8;GCSH;SAMD14;AKT2;4921524J17RIK;DPYSL3;STMN1;PWWP2A;MPV17;ANKS1B;MBNL2;9330159F19RIK;PRKCB;STARD7;SOX11;SCAMP1;EML4;FAR1;MAML3;ATF6;UBA52;VPS28;RNF122;SF1;ATF4;SLBP;NAA60;LRPAP1;MTMR3;SAR1A;CTBP2;AGAP3;HIF1A;ANAPC11;FAM171A1;ABR;HSPH1;FLRT3;D5ERTD579E;S100A13;ABCA1;CREBBP;PRPF38B;ACD;NDFIP1;CADM1;TIPARP;SETD1B;PLK2;NR2F1;THAP12;PBX2;P…
Genes Down-Regulated In STHdhQ7/Q7 Vs STHdhQ111/Q111 Cells In Normal Conditions GSE38001	287/1460	1.2e-10	6.71e-10	0	0	1.5815	36.1256	CYFIP2;PID1;TMEM200A;HDAC11;RAPH1;SPINT2;AQP5;SLC4A4;AI593442;DPYSL3;NDST3;ZFP286;ANKS1B;UNC13B;EPHA4;MED1;FBXO2;SLC6A15;HPCAL1;ACSL5;SOX11;CMBL;EBF4;DKK2;EML5;GAREM1;DAAM1;HECW2;RRAGD;ACOT2;ACOT1;TLN2;RIN1;1700016K19RIK;NGEF;KCTD15;NECAB2;FBF1;PDGFB;ENDOD1;IQGAP2;HNRNPLL;PPL;NKAIN2;FAM171A1;COMMD9;FLRT3;STC2;CFAP69;SYNDIG1;RRS1;MAP7;SLC19A1;ZBTB7C;CDK17;CADM1;NEBL;TIPARP;LRBA;GREB1;ERLIN1;NR2F1;…
Neuro2a Htt72Q-ni Vs Htt25Q-ni PMID28743452	406/2204	1.29e-10	7.21e-10	0	0	1.47333	33.5462	CYFIP2;TLNRD1;STMN4;ADARB1;ALKBH6;ZDBF2;GCSH;GLE1;CNST;DPYSL3;PWWP2A;STARD4;9330159F19RIK;WSB2;STARD7;HPCAL1;SOX11;EML4;EML5;RBP4;DAAM1;ACOT2;FAR1;ATF6;UBA52;ATF3;PLBD2;ATF4;PIF1;IQGAP2;PRDM10;ADAMTS10;HSPH1;TERT;EPB41L1;PLK3;MYH7B;JUP;MTERF2;TIPARP;POU6F2;CDC7;NR1D1;WDR54;DAZL;MEX3A;FAT1;FNDC10;UNC119;SFXN2;CDK13;CPEB2;EZH2;GSDME;ACHE;CDKN1A;BHLHE41;PYGL;SMPD3;SH3BGRL3;NEFH;UPF1;DUSP1;ELOVL6;PHF…
Genes Up-Regulated In iSPNs Of 9 Wks R6/2 Vs WT PMID32681824	512/2886	1.3e-10	7.24e-10	0	0	1.41823	32.283	PATJ;PID1;PNMAL1;NEXMIF;RAPH1;1700001L19RIK;DCAF8;ACCS;DCAF5;PTPDC1;GLDN;ZDBF2;SAMD14;RAVER2;DPYSL3;NDST3;WDR91;UNC13B;RBFOX2;STARD7;HPCAL1;B630019K06RIK;SOX11;GPR165;DAAM1;DAAM2;RBP1;SPIN2C;ACOT2;ACOT1;RABL2;ACOT3;MTMR3;CTBP2;FLII;ENDOD1;SLC30A10;C9ORF72;HIF1A;FAM149A;ABR;PCDHA1;RDH11;RRS1;CFAP65;SLC19A2;ABCA1;PLK3;CREBBP;H3F3B;EDEM1;THAP12;EIF2AK4;UCK2;CPEB1;PPP5C;MEX3A;ARL2BP;ADI1;ZFAT;FAT1;FN…
Oligodendrocyte Gene Module From Cerebral Cortex PMID18849986	206/976	1.4e-10	7.77e-10	0	0	1.71669	38.9504	CYFIP2;SPARC;PITPNA;OGFOD3;STMN4;SPINT2;SAMD14;GOLGA4;NIPAL3;HOMER3;MEF2A;PRKCI;RBFOX2;MBNL2;LIMCH1;PRKCB;ACTN1;ALG5;HPCAL1;FRS3;BCR;GPR162;RBP4;DAAM2;SIK3;KDELR2;BEX2;IGSF3;ENDOD1;TGFA;NEDD4L;6430548M08RIK;PPL;FAM171A1;PCDHA1;PRKAR2B;PCBP4;EPB41L2;MAP7;SCN3A;RAB11FIP5;LHPP;JAG2;ARPP21;DNAH17;H3F3B;ZFP638;PDE2A;L1CAM;HNRNPM;RNF103;CALM3;CALM1;PAM;TMEM151B;HIP1;CETN2;BHLHE41;PTPRF;AKAP12;TUBA1B;PP…
Changes In DNA Methylation In Frontal Lobe Region Of AD Vs Control GSE72778	356/1891	1.54e-10	8.52e-10	0	0	1.50716	34.0539	PNMT;SPON1;NEXMIF;STMN4;ICAM5;ELK1;SLC4A4;PTPDC1;HS6ST2;RPS6KA3;SOX3;DPYSL4;ZXDB;AKT3;RAVER2;KIF21B;IER5;RBFOX2;WSB2;ACTN2;ARL15;LIMCH1;STARD8;BOLA1;ISLR2;PHKA1;CSNK1D;ACSL4;ALG1;CMBL;EBF4;MTURN;ADCY9;RFX4;ADGRB1;ORAI2;SPIN2C;MAML3;RIN1;ASTN2;SPTBN4;BEX3;BEX2;INTU;MAGED1;ZFP503;FIGNL2;TMTC1;XKRX;ABR;SEC14L1;FAM124A;HLCS;PENK;RRS1;TNRC18;RAB11FIP4;VPS16;NTSR2;SMIM10L2A;SRPK3;EGR4;CADM1;CRADD;TIPAR…
Genes Changed In Mural Cells Of R6/2 Vs WT PMID32681824	75/259	1.58e-10	8.74e-10	0	0	2.57704	58.1581	DOCK6;PID1;SPARC;DGKB;CELF1;MTCL1;LAMC1;LDB2;CHD2;GPATCH8;SESN3;ERC2;RAB2A;GUCY1A2;RBFOX2;KCND2;TRPC3;ARL15;SGIP1;ARHGEF17;DENND2A;TPM1;CTDSPL;KCTD1;ANO4;ATP1B1;FOXP1;CACNB2;ARHGAP10;PCP4;DAAM2;ADAM12;RGS7BP;RAPGEF5;IGSF8;NFAT5;ZFP148;CEMIP;SLC24A3;PTN;NKAIN2;ABR;BCLAF1;ABLIM1;BRINP1;FLRT2;EPB41L2;PENK;FCHO2;PIP5K1B;CKB;ABCA1;ARNT2;CREBBP;MBD5;ARPP21;BCL11B;AUTS2;EYA1;PCDH7;CRIM1;SLC4A10;BICC1;PT…
Genes Up-Regulated In Expression In Quadriceps Muscle Of 16 Wk Mbnl1 KO Myotonic Dystrophy Mice GSE39911	162/724	1.7e-10	9.38e-10	0	0	1.84146	41.4224	SLC23A3;SLC46A3;CEP126;SH3GL3;OXTR;ANKRD35;TUSC1;RAPH1;HR;OGDHL;CLEC18A;CEP128;RPS6KA3;TMEM266;COMTD1;AI593442;WDR91;SLC16A6;CPNE2;SOX9;PHLDA3;KCNH2;MAP2K3;TLE4;ZFP579;LMO1;PAQR7;ACTN2;TPM2;VPS33B;TRP73;CACNA2D2;LMO7;CMBL;KCTD4;SLC9B2;DHDDS;TIAM2;OLFM2;NEIL2;MAP1A;PKP2;KCNQ3;CMPK2;MAML3;ASTN2;NGEF;CDKL1;ZFP503;6430548M08RIK;PMF1;GOLGA7B;PKHD1;KLC3;PRRC1;STC2;INPP5J;TSPAN5;KCNN2;KCNN3;TAC1;EXPH5;M…
Genes Changed In Cerebellum Atxn1[82Q]CaLoxM120A Mice Compared To Atxn1[82Q] KI Mice GSE114815	715/4235	1.75e-10	9.64e-10	0	0	1.3544	30.4269	CYFIP2;PATJ;TLNRD1;PNMAL1;RPL31;TMEM200A;SCX;DCAF8;WDR83;EMC10;STMN4;ADARB1;ACCS;ADARB2;FNBP1L;GPATCH8;ZDBF2;GLE1;GCSH;SAMD14;DPYSL4;AI593442;SCN11A;4921524J17RIK;RAVER2;DPYSL3;STMN1;PKNOX1;UNC13B;MED1;IAH1;9330159F19RIK;PRKCB;STARD8;COL23A1;HPCAL1;PHKA1;RC3H2;BCR;EML5;GPR162;DAAM2;ORAI2;FAR1;RABL2;ASTN2;ATF6;UBA52;ATF3;VPS28;NGEF;SKAP2;ATF4;MEAF6;TARSL2;CTBP1;PDGFB;ENDOD1;NEDD4L;AGAP3;TAPBPL;NYA…
Differentially Expressed Genes In HdhQ111 C57BL/6J Mice (Late Age Window) GSE88920	26/50	1.76e-10	9.67e-10	0	0	6.79007	152.5	CPNE9;HRK;RYR1;TMPRSS6;WNT8B;DMKN;NTS;SEC14L3;SLITRK6;CLSPN;PLK5;GPX6;ARHGEF39;PCDH20;DDIT4L;SLC4A11;UPB1;KRT9;PDE10A;TMEM114;ADORA2A;TNNT2;IL2RB;PTPN7;SCN4B;IFI27L2B
Down-regulated Genes In Cortex Of 10 Mon HD Q140 Mice Vs Q20 GSE78272	101/391	1.77e-10	9.71e-10	0	0	2.20953	49.6102	CCNT2;WWC1;WIPF3;ADARB1;SLC4A4;DOCK10;PPP4R4;PIM1;CAR11;ANKS1B;LZTS3;PPP1R16B;STARD8;KCTD1;PHKA1;SLC6A11;SHISA3;SHISA7;TRAIP;ADAM19;EML5;ACAP2;GAREM1;DAAM1;COL4A2;DAAM2;RFX4;FAR1;PPIG;RIN1;SRSF7;JCAD;PDE9A;VCL;D930048N14RIK;EPHA10;CABP7;NEDD4L;TGFA;GPR83;NDRG2;SLC9A3R2;FAM171A1;CFAP69;INPP5J;MAP7;KCNN2;PRPF38B;PLK5;TMEM86B;ARPP21;RASL10B;PTCH1;SLC4A11;B3GALT5;DGAT2L6;RPE65;SP9;FGFR3;RYR1;CDKN1A;C…
Down-regulated Genes In Striatum Of HdhQ111 Mice GSE64478	46/127	2.04e-10	1.11e-09	0	0	3.57371	79.7467	ACVRL1;HRK;RYR1;RAB3C;GASK1B;ZFP941;ITIH3;HLF;ANKRD35;TMPRSS6;MCUB;STC1;4930447C04RIK;GRM1;RGS4;SEC14L3;AI593442;PPP4R4;ABI3BP;PENK;SOX9;CLSPN;RREB1;S100A10;ZBTB18;KRT222;ARPP21;FST;TPM2;GPX6;DDIT4L;SLC4A11;NETO2;UPB1;PDP1;CACNB2;PCP4;ADORA2A;RTN4RL1;SYT10;SLCO2A1;AVP;ITGA5;PLEKHO2;NPTXR;SCN4B
Genes Changed In Astrocytes Of zQ175DN Vs HdhQ20 PMID32681824	109/434	2.05e-10	1.12e-09	0	0	2.12973	47.5126	CPNE8;SERPINE2;ATP8A1;NEXMIF;CLSTN1;PCDH11X;FAIM2;SLC4A4;ZDBF2;DOCK10;RGS4;APMAP;DAG1;CHP1;FAM3C;ENPP5;DYNC2H1;RBFOX2;TPM2;SLC6A15;ZBTB37;NPY1R;ISLR2;SOX11;CASD1;ATP1B1;KRT9;EML4;CACNB2;SELENOM;TMX4;PHIP;TNIK;LY6H;JCAD;DDX5;PCDH10;ARL3;TMEM59L;ITPR1;PCSK1N;PRKAR2B;SNTG1;TSPAN3;CLSPN;SCN3B;TAC1;VTI1B;ABCA1;OSBPL8;PRNP;TCAF1;ARPP21;LRRN3;NETO2;GRIN2B;NCEH1;PPP1R1B;CDS2;ITM2C;HRK;DPP10;RYR1;PTPRS;SO…
Genes Up-Regulated In Friedreich Ataxia iPSCs Expression Vs HS-27 Cell Line GSE22651	714/4238	2.74e-10	1.49e-09	0	0	1.34992	29.7246	PID1;SERPINE2;RAPH1;ADARB1;ACCS;DCAF5;SLC4A4;NDST1;SAMD14;DPYSL4;PSMD5;AKT3;WDR91;HOMER3;MPV17;IER5;MBNL2;RBFOX2;IAH1;HPCAL1;MRTFA;FRS3;DKK2;GPR162;ADCY9;DAAM2;ORAI3;MAP1A;ORAI2;SPIN2C;ACOT2;ACOT1;RABL2;ATF6;ACOT5;PLBD2;VPS28;SKAP2;ACOT3;LRPAP1;MEAF6;TARSL2;FLII;ENDOD1;AGAP3;TAPBPL;TRP53RKA;FAM171A1;ABR;FLRT2;HLCS;FLRT3;1110051M20RIK;SYNDIG1;S100A13;VPS16;S100A10;FZD1;NDFIP2;NDFIP1;CADM1;TIPARP;G…
Markers Of Trochlear Nucleus In Mesencephalon PMID22996553	81/292	3.01e-10	1.63e-09	0	0	2.42862	53.247	PATJ;DGKD;FAM13A;MAST1;SLC7A14;EMC10;HAPLN4;RYR3;SHD;RERG;ZFYVE28;HEBP2;PPP4R4;COTL1;PIM1;SLC16A6;NEFL;SLC16A7;NEFM;LGALS8;NEFH;SCN1B;SLC18A3;YWHAH;LMO1;GUCY1A2;MLIP;EPHA6;ADPRHL1;TESC;TMX4;ADCY9;FNDC4;AIM2;KCNMA1;DOK7;CDH12;CCDC42;NCOA7;RGS7BP;NAT8L;VSTM2A;SCN4B;SLC47A2;GRAMD1B;SHC3;EPB41;CABP7;KCNA1;TMTC1;RHOBTB2;SNN;SNTG2;ABLIM2;SOHLH1;STC2;ZMAT4;KCNN1;SPTSSB;SLIT3;LONRF1;RXRG;CCDC184;S100A10;…
Genes Changed In Loxapine Treated STHdhQ111 Vs Control GSE129143	434/2397	3.04e-10	1.65e-09	0	0	1.44423	31.6484	PATJ;WIPF2;DCAF5;FNBP1L;PTPDC1;NDST1;SAMD14;ZFYVE27;AKT2;LIPG;STARD4;RBFOX2;MRTFA;BCR;EML4;ADCY9;HECW2;ORAI3;MAP1A;ORAI2;ACOT2;FAR1;FAR2;MAML3;ATF6;ATF3;RNF122;ATF4;SF1;ZBTB8A;MTMR3;FLII;EPB41L1;HLCS;RDH11;ST3GAL2;FZD1;PLK3;WNT10A;SETD1B;LRBA;CDC7;PHC3;TMEM199;SQLE;GLUD1;MEX3A;GSDME;ZFP367;LPCAT1;SNX11;MED16;SHB;SMPD3;NHSL2;DSTYK;FAM102B;TMEM44;TCTN2;TIMP2;JAK2;JARID2;3110082I17RIK;DUSP1;DENND2A;…
Genes Down-Regulated In Astrocytes Of HD Patients Vs Control PMID32681824	312/1628	3.37e-10	1.82e-09	0	0	1.53424	33.4647	CYFIP2;CPNE8;SPON1;OXTR;PID1;SERPINE2;RAPH1;FNBP1L;SLC4A4;GPATCH8;GOLGA4;RAVER2;BTRC;KIFAP3;ANKS1B;DYNC2H1;EPHA4;RBFOX2;EPHA6;CMC2;COL23A1;CIRBP;PHKA1;SLC6A11;TMEM170B;EML4;AKAP9;KCNQ3;SIK3;FAR1;CCDC82;SF1;KCTD16;BEX3;MTMR3;INTU;MAGED1;PCDH10;WDR61;ACTR3B;HIF1A;NKAIN2;STRIP2;NKAIN3;DHX32;EPB41L2;XRRA1;S100A13;SARAF;DPH6;BBS2;ABCA1;B3GALNT2;RABGAP1L;NDFIP1;ARPP21;CADM1;LRRN3;ZFP638;TIPARP;GREB1;PO…
Markers Of Substantia Nigra, Pars Compacta In Mesencephalon PMID22996553	56/173	3.52e-10	1.9e-09	0	0	3.01671	65.665	RAB3C;OXTR;CMAS;PID1;GPR26;BNC2;MTCL1;GBE1;PYGL;RERG;RGS4;SMPD3;COMTD1;RESP18;TRPC6;DCC;KCND3;TMEM255A;GFRA1;VAV2;OLFM3;TUBB2A;LRRC3B;DGKH;HPGD;CHRNA7;SLC35D3;RGS16;ZFP503;KLHL13;GDPD5;LRRC55;NTN1;PRKAR2B;CCDC85A;SLITRK4;GSG1L;BEND4;PIP5K1B;DRD2;VAT1;TUB;SIAH3;GABRA4;TPBG;KLHL1;TUBB4B;DLK1;SYT17;PKIB;SPCS3;CYP2S1;KIF26B;SDC1;CNTN4;GALNTL6
Genes Changed In Mural Cells Of zQ175DN Vs WT PMID32681824	78/278	3.57e-10	1.92e-09	0	0	2.46614	53.6489	PCSK2;DOCK6;C2CD5;DOCK4;PID1;HIP1;GALNT13;CELF1;RAPH1;RORA;LAMC1;SLC4A4;CDH8;IGF1R;SYNE1;DACH1;AKT3;CHORDC1;ERC2;KIRREL3;ARHGEF11;EPHA6;RBFOX2;KCND2;DCC;SGIP1;KCTD1;CSNK1D;LMO7;ANO4;ARID1A;GPCPD1;RC3H2;FOXP1;CACNB2;ZEB1;DAAM1;DAAM2;KCNMA1;SIK3;RGS7BP;TOP1;DGKI;CDH18;ANKRD17;BEX2;DDX5;HLF;ANKRD12;CACNA1E;SPATA7;NKAIN2;EPB41L2;UBN2;PENK;UBC;DYM;CKB;WASF2;CREBBP;CADM1;INSR;KCNIP4;DDIT4L;DCBLD1;MPP7;…
Genes Down-Regulated In Human HD Neurons Vs Control Neurons PMID32070434	264/1334	3.61e-10	1.94e-09	0	0	1.5903	34.5753	PATJ;PID1;CMAS;RPL31;DCAF8;GPATCH8;GCSH;SYNPR;HABP4;CPNE2;SAMD10;ZFP286;FBXO9;RBFOX2;PAQR7;NHLRC3;ALG5;COL23A1;CIRBP;SOX11;VWA5B2;FRS3;EML4;FNDC4;NEIL2;DAAM1;ACOT2;ACOT1;VDAC2;MXRA7;ATP6V0D1;ACOT5;SF1;ACOT3;NECAB2;GCDH;BEX3;BEX2;NECAB3;INTU;MAGED1;SDC3;WDR61;LIAS;SMIM7;OSGEP;FAM149A;NKAIN2;RHOT2;XRRA1;SARAF;DPH6;1500009C09RIK;TRPM4;EGR1;PLK3;FIS1;EDEM1;IQSEC3;RANBP17;PHC3;PKIB;BC005537;CDAN1;CALY…
Genes Up-Regulated In Myotonic Dystrophy 2 Markers In Human Skeletal Muscle E-D-7014	476/2671	3.64e-10	1.95e-09	0	0	1.42058	30.8739	CYFIP2;POP5;PATJ;PNMAL1;RAPH1;DCAF8;ADARB1;DCAF5;GPATCH8;ZDBF2;GCSH;CNST;4921524J17RIK;ZXDB;AKT3;DPYSL3;RAVER2;PWWP2A;MEF2A;UNC13B;MED1;MBNL2;RBFOX2;NHLRC3;STARD7;PHKA1;SCAMP1;RC3H2;DKK2;DAAM1;FAR1;ATF6;NAA60;ZBTB8A;MTMR3;SAR1A;ANAPC16;ABCB4;ENDOD1;NEDD4L;PRDM10;ABR;FLRT2;FLRT3;EPB41L2;ZFP180;D5ERTD579E;PIP5K1B;RREB1;ABCA1;B3GALNT2;MYH7B;PRPF38B;NDFIP1;ARPP21;H3F3B;LRBA;PHC3;CYLD;FAT1;NAPEPLD;SFX…
Genes Up-Regulated In Non-Induced PC12 Cells Vs Induced Q74 PC12 Cells Both Treated With Vehicle GSE119557	166/755	4.11e-10	2.2e-09	0	0	1.80027	38.9098	KCNG2;RAB3C;SH3GL3;PLXND1;TONSL;ZBTB20;OGDHL;FBXO22;NUDT4;ZDBF2;FAM162A;DPYSL3;PKNOX1;RNF138RT1;KCNH3;CHRNB4;ACTN2;USP3;ACTN1;EML4;EML5;RBP4;OLFM3;CCNE1;MAPKAPK2;KCNQ3;FAR1;MAML3;TLN2;PDE9A;DGKH;SLBP;ZFP467;ADCYAP1R1;CTBP2;SLC35D3;ARHGEF28;CHRNA7;ACTR3B;XKRX;GOLGA7B;FAM171A1;TRP53I11;EFNB1;ASIC4;BRINP2;RACGAP1;GRK5;KIF3A;MAN2A1;ZMAT3;STC2;CDH22;TNRC18;KCNN3;SCN3B;SKIL;PLXNA4;MARK2;TBC1D16;PLK3;TM…
Genes Changed In Oligodendrocytes Of HD Patients Vs Control PMID32681824	152/676	4.39e-10	2.34e-09	0	0	1.85022	39.8661	LPGAT1;GALNT13;ATP8A1;DGKB;ZBTB20;EMC10;SPINT2;JADE2;1110065P20RIK;GLDN;PTPDC1;CDH8;CEP128;IGF1R;DOCK10;AKT3;CHORDC1;EPHB2;HMGN1;TLE4;KIRREL3;AGTPBP1;KCNH8;RALGAPA2;SLC6A15;CIRBP;LIFR;ATP1B1;FOXP1;TIAM2;KCTD8;TIAM1;RAB30;PCP4;HECW2;SIK3;ROR1;MAML3;ASTN2;SRSF7;CDKL1;DDX5;ANAPC16;NTM;ENDOD1;ITPR1;SLC30A10;PHF21A;NKAIN2;FAM171A1;STIP1;HSPH1;ATXN1;MAN2A2;CDH20;MAN2A1;EPB41L2;PSAP;UBC;CDK17;BBS2;FIS1;…
Expression In Hippocampus Of 10 Wk N171-82Q HD Mice GSE44306	36/89	5.54e-10	2.95e-09	0	0	4.26571	90.9219	CPNE9;CABP7;WIPF3;GPR63;IQGAP2;LYST;DDN;RASD2;STRIP2;BRINP1;CAMKV;GNG4;CAMK2N2;ENC1;PENK;PTK2B;HOMER3;WASF1;GABRD;GIT1;CAP2;KCNH3;PRNP;TRPC6;PLK5;RASL10A;PLEKHA2;CIRBP;HTR1B;KCTD4;ANO3;OLFM2;MYO5B;GPD1;PLCH2;KCNK4
Genes Up-Regulated In Trichostatin A Treated STHdhQ111 Vs Control GSE129143	135/584	6.4e-10	3.4e-09	0	0	1.91396	40.5172	CYFIP2;RAB3B;SLC46A3;CEP126;SH3GL3;FAAH;ATP8A1;TUSC3;FAM13A;OGDHL;SLC8A2;CLGN;RPS16;CCND2;APMAP;PPP4R4;ARHGDIB;EPHB2;ENPP5;KCNH3;DGAT2;DGAT1;SLC30A3;FBXO2;NPY1R;MTURN;GPR162;SELENOM;ADGRB2;ZFP40;ARMCX6;RRAGD;DOK7;ACOT2;ASPHD2;TRIB3;ATF3;BEX3;NXPH4;CREM;GPR85;ABHD6;IQGAP2;NDRG2;ACTR3B;TMEM121;SEC14L2;FAM171A1;TRP53I11;WNT6;INPP5J;MAP7;SARAF;KCNN3;WNT4;EEFSEC;GGT7;CYP2J6;NEBL;TNFRSF9;RAB27A;FAM199X…
Genes Up-Regulated In iSPNs Of HD Patients Vs Control PMID32681824	101/400	6.89e-10	3.66e-09	0	0	2.14188	45.1836	CHRM1;SERPINE2;PCDH11X;FAIM2;ADARB2;UBE2Z;ELK1;IGF1R;SESN3;BMPER;AGFG2;SCN1B;PPFIA3;SEMA6A;STARD7;LIMCH1;TMEM130;FOXP1;ADGRB2;LY6H;NECAB2;SHC3;TMEM59L;TMTC1;AK5;SLC30A10;NDRG2;ZBTB4;ACACA;PHF21B;ABR;BRINP2;PCSK1N;GRK2;FLRT2;HRH3;CDH20;TSPAN5;PRNP;CADM1;CRIM1;HSPA12A;BCL2;CREBRF;PLXNB1;GALNTL6;ACHE;THRB;GRIK5;C1QTNF4;TMEM47;CAMKV;GRM8;GPR137;ERC2;GIT1;BOK;CERS4;KCND2;SLC39A11;ETV1;RANGAP1;ANO4;MRP…
Markers Of Dentate Gyrus In Hippocampal Formation PMID22996553	76/272	7.36e-10	3.9e-09	0	0	2.4507	51.537	SPON1;GALNT13;BNC2;ONECUT2;DGKB;BHLHE41;SLC7A14;SLC8A2;DOCK10;TMEM266;DACH1;AI593442;TMEM44;KIRREL3;MREG;SLC30A3;ELMOD1;LRRIQ1;NPY1R;THOC3;FNDC9;KCTD4;EML5;TIAM1;SLC9A5;TNNT2;GPRIN1;CDC42EP3;RBM20;TNFRSF25;CFAP54;SLC27A2;CCNO;NGEF;CNGB1;SLC47A2;SLC24A4;IGSF3;COL11A2;PCDH15;GPR85;TGFA;KCNA4;ILDR2;PPL;LRRC55;COL19A1;FOXO1;FAM117A;TRP53I11;RMND5A;FLRT3;ZMAT4;CCDC85A;CFAP69;GSG1L;N4BP2;SCN3A;GABRD;EX…
OPC1a Oligodendrocyte Precursor Cell-Enriched Genes PMID30078729	638/3751	7.48e-10	3.95e-09	0	0	1.35632	28.5019	CYFIP2;TRIR;PID1;SERPINE2;RPL31;WIPF2;RAPH1;DCAF8;WDR83;EMC10;STMN4;FNBP1L;ALKBH6;GPATCH8;ZDBF2;NDST1;PCMT1;4921524J17RIK;DPYSL3;PWWP2A;MPV17;PKNOX1;IER5;ANKS1B;UNC13B;HES6;MBNL2;9330159F19RIK;PRKCB;SOX11;RC3H2;EML4;DAAM1;MAP1A;FAR1;RABL2;ATF6;UBA52;VPS28;SF1;ATF4;SLBP;NAA60;LRPAP1;MTMR3;SAR1A;CTBP2;MEAF6;CTBP1;LYPD1;WDR61;C9ORF72;HIF1A;ADAMTS10;ANAPC11;ABR;HSPH1;RIC8B;FLRT2;FLRT3;D5ERTD579E;S100…
Genes Changed In Sodium Butyrate Treated STHdhQ111 Vs Control GSE129143	720/4307	9.83e-10	5.18e-09	0	0	1.3351	27.6902	CYFIP2;PATJ;RPL31;TMEM200A;A430005L14RIK;SPINT2;ADARB1;GLE1;NDST1;MEF2A;STARD4;RBFOX2;WSB2;NHLRC3;PHKA1;BCR;GPR162;RBP4;ADCY9;MAP1A;RBP1;ORAI2;ACOT2;ACOT1;ASPHD2;ATF6;UBA52;ATF3;NGEF;SLBP;PIF1;MTMR3;SAR1A;FLII;PDGFB;PRDM15;TAPBPL;PRDM10;DEDD2;ANAPC11;FAM171A1;ABR;FAM124A;HSPH1;FLRT2;RDH11;EPB41L2;D5ERTD579E;LDHD;S100A13;RREB1;LHPP;S100A10;SLC19A2;JAG2;CDK17;FZD1;MYH7B;CREBBP;WNT10A;PLK5;H3F3B;SET…
Genes Up-Regulated In HD Vs Normal NPCs GSE118088	408/2251	1.02e-09	5.35e-09	0	0	1.44144	29.8453	1700001L19RIK;SPINT2;ADARB1;RXFP3;ZDBF2;COMTD1;SAMD15;GJA3;PPP4R4;IER5;MBNL2;UNC13A;COL23A1;FIBCD1;CACNA2D2;DKK2;RBP4;RFX4;RBP1;NGEF;LYPD1;ABR;FAM124A;RIC8B;FLRT2;C7;ADAMTS19;HLCS;1110051M20RIK;LDHD;RRS1;CFAP69;CHST15;GSG1L;PIP5K1B;CFAP65;FZD1;CADM1;TIPARP;NR2F1;GRIN2B;GPR137C;GLUD1;ADI1;SFXN3;CPEB2;FANK1;RSPH3A;SPEF1;LRRC10B;KCNC3;MEI4;SHB;RSPH3B;C1QTNF4;ZFP385C;HEY1;AIFM2;TCTN2;TMSB4X;TIMP2;261…
STHdhQ7/Q7 Vs STHdhQ111/Q111 Cells In Normal Conditions GSE38001	482/2730	1.08e-09	5.67e-09	0	0	1.40328	28.9715	CYFIP2;PID1;TMEM200A;RAPH1;SPINT2;SLC4A4;PTPDC1;AI593442;DPYSL3;NDST3;PWWP2A;ZFP286;ANKS1B;UNC13B;MED1;COL23A1;HPCAL1;SOX11;DKK2;EML5;RBP4;DAAM1;DAAM2;HECW2;ACOT2;ACOT1;NGEF;SKAP2;PDGFB;ENDOD1;IQGAP2;HIF1A;ANAPC11;FAM171A1;FLRT3;SYNDIG1;RRS1;CFAP69;SLC19A1;ZBTB7C;ABCA1;CDK17;FZD1;WNT10A;CADM1;NEBL;TIPARP;EDEM1;LRBA;NR2F1;ERLIN1;CDC7;NETO2;L1CAM;TMEM199;SLC6A6;UCK2;CPEB1;GIPC2;DCHS1;CPEB2;SETD4;PI…
Neuro2a Htt72Q (72Q-ni+72Q-i) Vs Htt25Q (25Q-ni) PMID28743452	558/3230	1.19e-09	6.23e-09	0	0	1.37369	28.2287	CYFIP2;TLNRD1;RPL31;STMN4;PTPDC1;ZDBF2;GLE1;GCSH;CNST;AKT3;STMN1;PWWP2A;MED1;PRKCI;9330159F19RIK;WSB2;STARD7;DDX11;SOX11;RC3H2;EML4;EML5;RBP4;DAAM1;ARMC6;ACOT2;FAR1;ASTN2;ATF6;UBA52;PLBD2;ATF3;ATF4;SLBP;PIF1;TARSL2;IQGAP2;MRPL12;PRDM10;C9ORF72;ADAMTS10;DEDD2;FAM171A1;RHOT2;HSPH1;TERT;HLCS;EPB41L1;ZBTB7A;S100A10;PLK3;MYH7B;ARPP21;GPR12;CADM1;MTERF2;SETD1B;POU6F2;THAP12;PBX2;CDC7;WDR54;DAZL;MEX3A;G…
Genes Up-Regulated In Friedreich Ataxia iPSCs Expression Vs HDF Cell Line GSE22651	651/3850	1.31e-09	6.85e-09	0	0	1.34675	27.5444	PID1;SERPINE2;TMEM200A;UXS1;RAPH1;ADARB1;ACCS;NDST1;SAMD14;AI593442;ZXDB;HOMER3;MPV17;IER5;MEF2A;MBNL2;RBFOX2;IAH1;NHLRC3;HPCAL1;FRS3;DKK2;GPR162;ADCY9;DAAM2;HECW2;ORAI3;MAP1A;SPIN2C;ACOT2;ACOT1;RABL2;ATF6;ACOT5;PLBD2;ATF3;VPS28;RNF122;SKAP2;ACOT3;LRPAP1;MTMR3;MEAF6;ABCB4;ENDOD1;AGAP3;TAPBPL;HIF1A;TRP53RKA;ABR;FLRT2;HLCS;FLRT3;EPB41L2;1110051M20RIK;S100A13;VPS16;S100A10;ABCA1;FZD1;NDFIP2;NDFIP1;C…
Up-regulated Genes In Striatum Of Foxp1 KO Vs WT Mice GSE62718	73/261	1.51e-09	7.87e-09	0	0	2.45255	49.814	DPP10;OXTR;CDKN1A;PID1;TMEM200A;CPNE7;RASGRF2;ADARB1;SIPA1L2;ELFN1;RXFP3;ARMH4;CRTAC1;NDST3;TUNAR;NEFL;GGACT;QRFPR;NEFH;NUDT12;PHYH;MREG;KCND3;STARD8;LIFR;DISP3;CCNE1;SLC9A9;SLCO2A1;PKP2;CDH12;BCAT1;ACOT5;JDP2;CAMK2D;ZFP423;EPHA10;IGSF3;KLHL14;ILDR2;LIN7A;HDAC9;FGD4;GLRA3;TMEM65;GNG4;CAMK2N2;OTOF;KCNN2;PIP5K1B;SPTSSB;EXPH5;ZBTB7C;KCNJ3;ANKRD34C;KCNIP1;CAV2;PCDH20;KCNB2;CCDC136;KCNIP4;KRT12;SHISAL…
Genes Down-Regulated In Neuro2a Htt72Q-i Vs Htt25Q-ni PMID28743452	517/2966	1.58e-09	8.23e-09	0	0	1.38427	28.0522	TLNRD1;WIPF3;PTPDC1;ZDBF2;GLE1;GCSH;CNST;AKT3;STMN1;PWWP2A;ANKS1B;MED1;PRKCI;9330159F19RIK;STARD7;DDX11;SOX11;RC3H2;BCR;EML4;EML5;ARMC6;FAR1;ASPHD2;SLBP;PIF1;TARSL2;IQGAP2;MRPL12;ADAMTS10;RHOT2;HSPH1;TERT;HLCS;EPB41L1;ZBTB7A;ST3GAL2;SLC19A1;ABCA1;ARPP21;GPR12;CADM1;GTF2IRD2;SETD1B;THAP12;PBX2;CDC7;PHC3;DAZL;SLC6A6;PPP5C;MEX3A;ARL2BP;GPR180;FAT1;FNDC10;SFXN2;CDK13;CPEB2;EZH2;GSDME;LIN54;SETD2;ZFP3…
Genes Changed In Corpus Callosum Of BN Vs BACHD Mice PMID31015293	108/444	1.75e-09	9.1e-09	0	0	2.03901	41.1104	CPNE9;ANKRD13D;RAB3A;CLSTN1;FAIM2;ADARB1;CXCL14;SLC8A2;NUDT4;TMEM145;RIMS3;FPGT;SCN1B;PPFIA3;KCNH3;UNC13A;SLC30A3;VWA5B2;GPR162;CACNB3;FNDC4;DAAM1;ADGRB2;GPRIN1;RELL2;KANK3;RTN2;SPTBN4;DIPK1B;NECAB3;EPHA10;CCDC149;ARHGEF25;MGST3;ENDOD1;TGFA;AGAP3;CRHR1;TMEM25;GRK2;ZMAT4;SMYD2;INPP5J;IGFBP6;RREB1;RAB11FIP5;MYH7B;KLHDC3;RASL10A;CCDC136;IQSEC3;CNOT6;PI4KA;CCDC92B;PLCH2;PCSK2;CNTNAP1;TMEM151B;KCNC3;D…
Genes Down-Regulated In Friedreich Ataxia iPSCs Expression Vs HUVEC-BF5 Cell Line GSE22651	646/3824	1.84e-09	9.53e-09	0	0	1.34409	27.0353	CYFIP2;PATJ;PID1;SERPINE2;PNMAL1;TMEM200A;WIPF3;SPINT2;FNBP1L;DCAF4;GCSH;COMTD1;GJA3;PPP4R4;4921524J17RIK;PWWP2A;PKNOX1;ZFP286;RNF138RT1;HES6;MED1;PRKCI;NHLRC3;PRKCB;DDX11;COL23A1;CACNA2D2;SOX11;SYTL5;GTPBP3;EML4;ARMC6;RBP1;ASTN2;UBA52;ATF4;PIF1;SAR1A;FIGNL2;IQGAP2;C9ORF72;FAM149A;DEDD2;RIC8B;PCDHA1;TERT;RDH11;ADAMTS19;EPB41L2;LDHD;SYNDIG1;RRS1;CFAP69;PIP5K1B;LHPP;VTI1B;ABCA1;ARPP21;CADM1;H3F3B;N…
Expression In The Heart Of Mice Inducibly Expressing Celf1 For 72 H GSE56185	472/2676	1.95e-09	1.01e-08	0	0	1.39961	28.0726	TMEM200A;WDR83;SPINT2;FNBP1L;SLC4A4;PTPDC1;GLE1;NDST1;ZFYVE27;DPYSL4;ZXDB;RAVER2;WDR91;MPV17;MED1;PRKCI;IAH1;NHLRC3;STARD7;STARD8;RC3H2;ADCY9;DAAM2;ACOT2;ACOT1;FAR2;ATF6;ATF3;RNF122;SLBP;ZBTB8A;WDR61;IQGAP2;HIF1A;RHOT2;TERT;ZFP180;PIP5K1B;ST3GAL2;SLC19A1;LHPP;EXPH5;VTI1B;SLC19A2;MYH7B;PRPF38B;NEBL;GTF2IRD2;PLK2;EDEM1;NR2F1;THAP12;INO80;ELL2;PHC3;RNF103;FAT1;PAM;LIN54;CDKN1A;SETD2;ZFP367;PHF1;PYGL…
Genes Changed In Microglial Cells Of HD Patients Vs Control PMID32681824	188/899	2e-09	1.03e-08	0	0	1.69091	33.8655	SPON1;UBXN2B;FAM13A;ZBTB20;JADE2;GLDN;IGF1R;PPP1CB;GOLGA4;AKT3;CCNL1;SLC16A3;HMGN1;MEF2A;MBNL2;PRKCB;RALGAPA2;AP1B1;FOXP1;EML4;TIAM1;PCP4;GAREM1;SLC9A9;KCNQ3;SIK3;FAR2;TLN2;SRSF7;SKAP2;DDX5;PFKFB3;ANAPC16;CTBP2;CTTNBP2;ZBTB1;ITPR1;NEDD4L;6430548M08RIK;AGAP3;IQGAP2;SLC30A10;HIF1A;FAM149A;PHF21A;ABR;STIP1;GRK3;ARHGAP20;HSPH1;ATXN1;MAN2A1;EPB41L2;PENK;UBC;SYNDIG1;PGK1;CHST15;MAP7;SARAF;ANKRD10;TNRC1…
Down-regulated Genes In HdhQ111 C57BL/6J Mice (Late Age Window) GSE88920	22/41	2.05e-09	1.05e-08	0	0	7.24895	145.031	CPNE9;HRK;RYR1;PLK5;TMPRSS6;ARHGEF39;GPX6;WNT8B;DDIT4L;SLC4A11;DMKN;UPB1;KRT9;SEC14L3;PDE10A;TMEM114;ADORA2A;IL2RB;CLSPN;PTPN7;IFI27L2B;SCN4B
Cerebellum Coexpressed Gene Module PMID17101986	191/917	2.06e-09	1.06e-08	0	0	1.68283	33.6548	DGKG;SH3GL3;RIPOR2;PATJ;CCNT2;DGKD;FAIM2;ICAM5;ADARB1;ELK1;GPATCH8;CDH8;CLGN;PPP1CC;SAMD14;DPYSL4;NIPAL3;SACS;HOMER3;PPFIA4;KCNH2;SEMA6C;TLE2;RBFOX2;ATP6V1G2;TPM2;CGRRF1;MYT1;ARMCX4;TIAM1;ACAP2;DMTF1;ADGRB2;AKAP9;RRAGD;ROR1;PHIP;TLN2;FKBP4;CSNK1G2;SF1;NSMAF;ZFP330;RTN2;ANKRD17;BRSK2;MTMR3;SHC3;KMT2A;CTBP2;IGSF3;ANKRD12;6430548M08RIK;SLC1A6;PHF21A;CRHR1;RHOBTB2;TRP53I11;ABR;SNN;ATXN1;FLRT2;EPB41L1…
Genes Down-Regulated In Brain Vs Spinal Cord Derived OPCs From E13.5 Mouse Embryos PMID30078729	221/1096	2.11e-09	1.08e-08	0	0	1.61982	32.3575	CPNE8;SPON1;CPNE7;WIPF3;SCX;HTR4;HS6ST3;ZFYVE28;DPYSL4;RASSF3;AI593442;GJA3;TUNAR;PTGFRN;IL15RA;ACTN2;ZFP976;CACNA2D2;SLC6A11;VWA5B2;ADCY9;DAAM2;ASTN2;NGEF;SKAP2;KCTD16;SPTBN4;EPHA10;TMEM63C;ZFP503;FIGNL2;TMTC1;ADAMTS10;CRHR1;SEC14L1;PENK;OTOF;ZBTB7C;ABCA1;JAG2;NEBL;FAM78A;GREB1;IQSEC3;DDIT4L;CPEB1;KLHDC8A;CYP2S1;ITGBL1;GALNTL6;HRK;RYR1;ACHE;GASK1B;SLC35F4;SIPA1L2;SIPA1L3;MMP23;TRIM9;ADAMTSL5;CRT…
Genes Up-Regulated In hESCs After ATF7IP Knock Down GSE118088	180/853	2.19e-09	1.12e-08	0	0	1.70901	34.0748	SPON1;NEXMIF;NPY2R;IRS4;STMN4;CDH8;HS6ST2;CLEC18A;CLGN;RPS6KA3;SOX3;HHAT;DACH1;CNTNAP5B;TBC1D30;COTL1;SOX9;SLC16A3;PPFIA4;PDK1;TLE4;LMO1;MBNL2;COL27A1;ZFP3;SKIDA1;ZBTB37;POU3F3;DISP3;OLFM3;COL4A2;RFX4;DENND6B;NPTXR;DIPK1C;ZFP467;PFKFB3;SHC3;CABP7;ZFP503;LYPD1;PDGFB;GPR85;ILDR2;AK4;LTBP2;MAN2A2;FLRT3;CDH20;PGK1;SMYD2;RHPN1;TNRC18;WNT1;GRIA3;DRD4;SYT5;FZD1;CBX8;EGR1;TMEM132E;SMAD3;CADM1;GADD45B;ODF…
Striatum RNA M43 Module (Ivory) PMID26900923	66/229	2.42e-09	1.23e-08	0	0	2.55459	50.6859	FAAH;ZFP367;A430005L14RIK;FAIM2;LARP1B;ANKRD9;PANX2;TRIM3;SIX3;GPR137;PHYH;PRMT7;MIGA2;TAGAP1;CHPF2;IFNGR2;AP1B1;ACSL5;B630019K06RIK;SYP;VWA5B2;ANO4;CGRRF1;ARFGAP3;GPR162;TUBB2A;FAM185A;MAPKAPK2;GFOD2;RHOV;ACOX3;PAOX;SLBP;SNAP47;PKDCC;CLEC2L;SRC;MGST3;GLRX;PMF1;PSMB10;ARVCF;TMEM202;APOL8;GPC1;SMYD2;RBBP8;APBB1;ATP9A;SLC19A2;TRPM4;ZBTB7C;KLHDC2;GGT7;SLC35E3;HPS6;NAP1L4;G6PC3;UBLCP1;GKAP1;PRKRA;TCE…
Genes Up-Regulated In Friedreich Ataxia iPSCs Expression Vs Mel1 P52 Cell Line GSE22651	358/1947	2.46e-09	1.25e-08	0	0	1.46029	28.9482	CYFIP2;FAAH;ACCS;ALKBH6;HS6ST2;CYB5D2;SAMD14;PPP4R4;WDR91;HOMER3;SOX9;EPHB2;IER5;EPHA4;LIMCH1;DDX11;CACNA2D2;ZFP619;SOX11;ZFP618;CMBL;BCR;TIAM2;TIAM1;GPR162;PLPP6;ORAI3;CSNK2B;XRN2;ASPHD2;ZFP7;RABL2;TLN2;MXRA7;1700016K19RIK;PLBD2;VPS28;NECAB2;MTMR3;NECAB3;INTU;CTBP1;MAGED1;PCDH10;FLII;ZFP503;FIGNL2;6430548M08RIK;AGAP3;SEC14L2;FAM171A1;DGUOK;RHOT2;COMMD9;RACGAP1;EPB41L1;HLCS;FLRT3;1110051M20RIK;VP…
CA3 Overexpressed Genes Compared To CA1 Newrzella PMID17937787	122/525	3.09e-09	1.57e-08	0	0	1.92289	37.6814	CPNE9;POP5;SH3GL3;ATP8A1;NPY2R;CIB2;MSMO1;TMEM141;GLDN;SYNPR;LSM11;MAEA;CCND2;HOMER3;BTRC;PPFIA4;RGS7;TLE4;EPHA4;ACTN2;MAGI3;SKIDA1;HPCAL1;EPDR1;ACSL4;SCAMP1;THNSL2;ADAM19;TPST1;MYCL;CRISPLD1;CSNK2B;ORAI2;ATF4;CEMIP;PFKFB3;NECAB3;AK4;AK5;KLC1;FOXO1;PGS1;TRP53I11;SNN;FUT8;FLRT3;HLCS;SMYD2;SNX7;PDZD7;WNT10A;PLK5;AUTS2;NEK6;PCDH20;POU6F2;NETO2;COPRS;PKIB;SQLE;CPEB1;TMEM114;UBLCP1;FNDC10;NAPEPLD;PEMT…
eVLMC Embryonic Vascular And Leptomeningeal Cell-Enriched Genes PMID30078729	644/3824	3.35e-09	1.7e-08	0	0	1.33763	26.1019	TRIR;PID1;SERPINE2;RPL31;RAPH1;DCAF8;EMC10;FNBP1L;GPATCH8;GCSH;PCMT1;SAMD14;DPYSL4;AKT2;4921524J17RIK;DPYSL3;STMN1;PWWP2A;MPV17;MBNL2;RBFOX2;IAH1;9330159F19RIK;STARD7;COL23A1;SOX11;SCAMP1;RC3H2;EML4;FAR1;MAML3;ATF6;UBA52;VPS28;RNF122;SF1;ATF4;SLBP;NAA60;LRPAP1;SAR1A;ANAPC16;CTBP2;CTBP1;WDR61;AGAP3;MRPL12;HIF1A;ADAMTS10;ANAPC11;FAM171A1;ABR;HSPH1;FLRT2;FLRT3;D5ERTD579E;VTI1B;S100A10;ABCA1;CREBBP;P…
Genes Down-Regulated In Expression In Cerebellum Of 10 Wk N171-82Q HD Mice GSE44306	281/1469	3.43e-09	1.74e-08	0	0	1.52378	29.6989	CPNE9;SLC46A3;POP5;PATJ;TMEM200A;WIPF3;SCX;MSANTD1;STMN1;SAMD10;HES6;ATP6V1G2;PAQR7;UNC13A;FIBCD1;HPCAL1;KRT9;ZC2HC1C;TIAM1;DAAM2;ORAI3;RRAGD;KCNQ3;ATF3;NGEF;RNF122;GRB7;NECAB3;EPHA10;EPB41;STC1;6430548M08RIK;ADAMTS10;CRHR1;STRIP2;EPB41L1;HLCS;PCBP4;PENK;CHST15;INPP5J;MAP7;DYM;GSG1L;PIP5K1B;EXPH5;PCK2;EGR1;PRPF38B;PLK5;GPR12;JUP;PDE2A;NETO2;NR1D1;HSPA12A;DCLK1;GJB3;NAPEPLD;SDC1;PLCH2;EZH2;TMEM151…
Genes Up-Regulated In Sst/Npy-expressing Interneurons Of HD Patients Vs Control PMID32681824	100/406	3.47e-09	1.76e-08	0	0	2.07053	40.3315	ADARB2;CXCL14;HS6ST2;ZFYVE28;RPS6KA4;DOCK10;NDST3;DAG1;CPNE2;EPHB2;WASHC1;SCN1B;LZTS3;PDK1;KIRREL3;TLE2;LMTK3;OLFM2;ADCY9;ADGRB2;MAP1A;ZFP346;CTBP2;INSIG1;CHRNA7;TMEM59L;PLD5;SLC30A10;NDRG2;GLIS1;SLC9A1;ASIC4;EPB41L1;CDH20;ZMAT4;CASKIN1;CHST15;RAB11FIP3;KIRREL;TMEM132E;ARPP21;CADM1;INSR;PARVA;SYNJ2;LRFN2;PTPRE;SDK1;PTK7;PLXNB1;CNTN3;DPP10;RYR1;CHD7;GRIK1;CHD3;LDB2;SIPA1L3;AKAP13;GIT1;CERS4;ARG2;D…
Genes Changed In Microglia Of AD Model Mice PMID26001565	304/1613	3.63e-09	1.83e-08	0	0	1.49868	29.1233	SLC46A1;TLNRD1;SPARC;SERPINE2;A430005L14RIK;UBE2L6;ADARB1;GBA2;RASSF3;AKT3;HABP4;TRIM26;KIF21B;TBC1D10A;PDK1;UNC13B;STARD4;IAH1;ACTN1;STARD8;ENTPD5;AP1B1;CSNK1D;GCAT;DKK2;GPR162;NEIL2;FNDC4;DAAM1;ACOT1;TRIB3;KDELR2;MXRA7;TRIM11;NGEF;LRPAP1;BEX2;MAGED1;SLC35D3;ABCB4;MGST3;SDC3;ZFP503;OMA1;ACTR3B;HIF1A;SEC14L2;DHX32;EPB41L2;TSPAN5;RAB11FIP4;S100A10;SLC19A2;NTSR2;JAG2;BBS2;VAT1;NDFIP1;ARPP21;TIPARP;…
Genes Up-Regulated In R6/1 Good Vs WT GSE135057	399/2216	3.76e-09	1.9e-08	0	0	1.4268	27.677	NEXMIF;SPINT2;DCAF5;ALKBH6;PTPDC1;SAMD14;ZFYVE27;DPYSL4;PSMD5;DPYSL3;SAMD10;RNF138RT1;HES6;MED1;STARD7;GPR165;SPIN2C;VPS28;SLBP;MTMR3;SAR1A;ABCB4;FLII;WDR61;PRDM10;DEDD2;RDH11;1110051M20RIK;CFAP65;CREBBP;NDFIP1;POU6F2;EIF2AK4;TMEM196;TMEM199;GPR180;FAT1;PCDHB5;UNC119;DCHS1;DMRTC1A;FANK1;LAD1;ZFP367;TGFB1I1;ARHGAP1;CLTA;RSPH3B;LETM2;DSTYK;TCTN2;TRIM3;TIMP2;GPR137;NELFB;GPRASP2;WDR37;IFNGR2;WDR35;F…
Genes Down-Regulated In iSPNs Of 3 Mon HdhQ170 Vs HdhQ20 PMID32681824	29/67	4.03e-09	2.02e-08	0	0	4.78463	92.4868	CHRM1;ANKRD35;CELF1;EPB41;TMEM121B;NEDD4L;WNT8B;TCF20;HS6ST3;BRINP1;TCTN2;CHN1;CKB;SAMD1;ANKS1B;ZBTB18;KCNH3;RBM15;PLK2;YLPM1;DDIT4L;PPP2R5D;BAIAP2;KRT9;SRPK1;GNAO1;CACNB2;SYT10;EIF4G1
Genes Up-Regulated In Endothelial Cells Of zQ175DN Vs WT PMID32681824	111/467	4.22e-09	2.12e-08	0	0	1.97781	38.1376	CCNT2;LPGAT1;GALNT13;DGKB;FAM13A;PRDM5;GPATCH8;CDH8;NDST3;SCMH1;CHORDC1;BTRC;MEF2A;TLE4;ACVR1;KIRREL3;MED1;EPHA4;GUCY1A2;SEMA6A;ARL15;COG5;LIMCH1;LIFR;THOC2;VRK3;CACNB2;ADCY9;KCNQ3;PHIP;KCTD16;ANKRD17;ZFP346;DDX5;KMT2A;NTM;PDGFB;GMCL1;STK3;NKAIN2;PCSK1N;BRINP1;FLRT2;SNTG1;PIP5K1A;GRIA3;CREBBP;PRPF38B;CADM1;AUTS2;NEBL;LRBA;PTPRD;REEP1;CDK8;LRFN5;DIAPH2;RALYL;DLG2;CREBRF;OSBPL1A;THRB;TENM4;RYR3;REV…
Glutamatergic Synapse Gene Module From Human Brain PMID20616000	37/99	4.35e-09	2.18e-08	0	0	3.74719	72.145	NECAB2;HRK;LRPAP1;SLC24A3;RGS14;EPB41;CPNE7;HPCA;RASAL1;ICAM5;CACNA1E;DDN;FAM117A;LAMP5;SMPD3;CAMKV;GNG4;ENC1;SUSD4;PTK2B;KCNN2;SCN3B;STUM;MAPK3;BCL11B;PDE2A;HPCAL1;FAM189A1;BAIAP2;BAIAP3;GPR162;DIAPH2;P2RX5;PKP2;ADGRL1;LY6H;NPTXR
Genes Down-Regulated In Pvalb/Th-expressing Interneurons Of zQ175DN Vs WT PMID32681824	60/203	4.47e-09	2.23e-08	0	0	2.64439	50.8407	SNAP25;HIP1;CCNT2;ATP8A1;CELF1;WIPF3;SLC4A4;HS6ST3;TRIM9;SPRED2;SPRED1;REV3L;JARID2;ZFP280D;LIMCH1;RALGAPA2;HPCAL1;ELOVL6;ETV1;ETV5;BCR;TIAM1;SFPQ;SIK3;RGS7BP;TOP1;ASTN2;CEMIP;SHC3;CTTNBP2;GPR83;ZFP804A;HDAC9;BTAF1;BRINP1;FLRT2;UBN2;PENK;KRIT1;CTNNA3;CKB;GABRD;FNIP2;CLVS1;LGI1;OSBPL8;TCAF1;PCGF5;IQSEC3;PLCL2;TMEM196;HS3ST4;GNAO1;EEPD1;LRCH1;PDE10A;LNX1;CAMK1;MAP3K13;PAM
Differentially Expressed Genes In Corpus Callosum Of BN, BACHD And WT Mice PMID31015293	90/355	4.69e-09	2.34e-08	0	0	2.14896	41.2111	CPNE9;PCSK2;CNTNAP1;TMEM151B;ANKRD13D;PCDHGB6;DIRAS1;CLSTN1;CLTB;FAIM2;ADARB1;CXCL14;NUDT4;HK1;C1QTNF4;TMEM145;RIMS3;FPGT;DACT2;SCN1B;PPFIA3;KCNH3;LYNX1;ACTL6B;SLC30A3;TRPC3;ABCC8;ARHGEF17;FIBCD1;KCNAB2;ENAH;GPR162;TIAM1;CACNB3;SELENOM;FNDC4;ADGRB2;DAAM1;SNPH;PITPNM3;GPRIN1;ARHGEF4;RELL2;NAT8L;KANK3;SHANK1;ANKRD17;RTN2;SPTBN4;LTK;HLF;EPHA10;TMEM63C;CLEC2L;MGST3;AK4;AGAP3;NTN1;CRHR1;BEGAIN;TMEM25;…
Expression In The Heart Of Mice Inducibly Expressing Celf1 For 24 H GSE56185	615/3638	4.79e-09	2.38e-08	0	0	1.34048	25.6804	CYFIP2;TLNRD1;TMEM200A;SCX;FNBP1L;GLE1;NDST1;DPYSL4;4921524J17RIK;ZXDB;WDR91;SAMD10;HES6;PRKCI;IAH1;STARD8;HPCAL1;RC3H2;DKK2;BCR;ARMC6;ACOT2;ACOT1;FAR1;FAR2;PLBD2;VPS28;RNF122;MTMR3;ANAPC16;CTBP2;PDGFB;ENDOD1;ADAMTS10;XKRX;FAM171A1;TERT;EPB41L1;ZFP180;1110051M20RIK;LDHD;CHST15;SLC19A1;EXPH5;JAG2;PLK3;PRPF38B;ACD;JUP;MTERF2;GTF2IRD2;NR2F1;ERLIN1;NR1D1;ELL2;CPEB1;RNF103;GPR180;EZH2;ACHE;TGFB1I1;KDM…
Striatum RNA M25 Module (Orange) PMID26900923	43/125	4.87e-09	2.42e-08	0	0	3.29608	63.09	CD164L2;HLF;WWC1;NTM;SLC1A1;GDPD5;GRM1;TMEM164;RMND5A;RASSF3;GRK5;4921524J17RIK;RAVER2;PIM1;INPP5J;DYM;DROSHA;LRRFIP2;RREB1;SRGAP1;ANKRD50;RGS7;WNT4;CLVS1;KRT222;LYNX1;EGFEM1;ABCC8;GABRA4;TPD52L1;PLXDC1;GPR137C;REEP1;PDP1;TIAM1;SLC7A8;KCNS1;RTN4RL1;G6PDX;CASQ2;CNTN4;PLCH2;SHANK3
Genes Up-Regulated In Friedreich Ataxia iPSCs Expression Vs NuFF Cell Line GSE22651	711/4286	5.41e-09	2.68e-08	0	0	1.31821	25.0926	PID1;SERPINE2;TMEM200A;RAPH1;ADARB1;ACCS;DCAF5;GLDN;NDST1;SAMD14;AI593442;PSMD5;AKT2;AKT3;WDR91;HOMER3;MPV17;IER5;MEF2A;MBNL2;RBFOX2;IAH1;NHLRC3;FIBCD1;HPCAL1;MRTFA;FRS3;ADCY9;DAAM2;ORAI3;MAP1A;SPIN2C;ACOT2;ACOT1;RABL2;ATF6;ACOT5;PLBD2;VPS28;SKAP2;ACOT3;LRPAP1;MTMR3;MEAF6;TARSL2;CTBP1;FLII;ENDOD1;AGAP3;TAPBPL;TRP53RKA;ABR;FLRT2;HLCS;FLRT3;1110051M20RIK;CHST15;S100A13;VPS16;EXPH5;S100A10;ABCA1;FZD…
NP1b Neural Progenitor Cell-Enriched Genes PMID30078729	778/4741	5.48e-09	2.71e-08	0	0	1.30674	24.858	A430005L14RIK;SPINT2;ALKBH6;PTPDC1;ZDBF2;SAMD14;DPYSL4;AKT2;AKT3;DPYSL3;PWWP2A;PKNOX1;RBFOX2;STARD7;CACNA2D2;SCAMP1;RC3H2;BCR;EML4;EML5;RABL2;ATF6;SF1;ATF4;SLBP;SAR1A;MEAF6;FLII;IQGAP2;MRPL12;HSPH1;RDH11;PRKAR2B;D5ERTD579E;1110051M20RIK;CFAP69;VTI1B;ABCA1;CREBBP;PRPF38B;JUP;CADM1;TIPARP;NCAPH2;NR2F1;PBX2;NETO2;NR2F6;SFXN3;FAT1;PSMG4;EZH2;ARHGAP1;SHB;SHD;JPH4;TMEM47;MED13;TMEM44;SMPD1;SH3BGRL3;NEL…
Genes Up-Regulated In HdhQ150 Vs WT Mice GSE139847	46/139	5.87e-09	2.9e-08	0	0	3.11041	58.9551	CCDC71L;FAAH;OXTR;CAMK2D;ONECUT2;TMEM200A;CPNE7;NPY2R;PTPRO;LYPD1;PCDH15;ILDR2;AK4;BHLHE22;ZDBF2;TRP53I11;EPB41L4B;FGD4;GLRA3;NNT;OGFOD1;CCDC85A;NDST3;TRA2A;TIMP2;BRINP3;N4BP2;STUM;CADM1;APAF1;ANGPT1;PCDH20;COL23A1;HPCAL1;NR2F1;ATP2B4;SOX11;ZFP618;ETV1;KCTD4;GRHL1;SYT17;GPRIN1;NCOA7;NPTXR;VSTM2A
Down-regulated Genes In Cerebellum Of 6 Mon HD Q175 Mice Vs Q20 GSE73468	265/1378	6e-09	2.96e-08	0	0	1.53118	28.9873	CPNE8;SLC46A1;LPGAT1;SPARC;SERPINE2;WIPF3;AQP5;SLC4A4;AI593442;MSANTD1;RPS6KA2;STMN1;MEF2A;EPHA4;PAQR7;MBNL2;SLC6A11;TMEM170B;DAAM2;RFX4;RIN1;NGEF;PLBD2;NECAB2;ENDOD1;6430548M08RIK;TMTC1;ADAMTS10;CRHR1;ABR;STRIP2;EPB41L1;HLCS;1110051M20RIK;INPP5J;GSG1L;DPH6;1500009C09RIK;RAB11FIP5;LHPP;NTSR2;SRPK3;PRPF38B;PLK5;BCL11B;NEBL;IQSEC3;PDE2A;NR1D1;HSPA12A;SLC6A6;SQLE;CPEB1;PPP1R1B;CREBRF;SDC1;CYSTM1;GST…
Genes Down-Regulated In Inferior Olive Of 12 Week Old Atxn1[154Q/2Q] Vs WT GSE122099	101/416	6.52e-09	3.21e-08	0	0	2.03117	38.2836	CPNE9;KCNG4;SPARC;MSMO1;SLC4A4;LAMP5;STMN1;HOMER3;SCN1B;KCNH2;KIRREL3;KCNH3;PAQR7;FBXO2;HPCAL1;PHKA1;SLC6A11;ATP1B1;PCP4;UBA52;NGEF;NECAB2;NECAB3;CABP7;INSIG1;NXPH4;LYPD1;AK4;NDRG2;CACNA1G;PGS1;ENHO;HRH3;PENK;CDH22;GSG1L;KCNN2;SCN3A;NTSR2;FZD1;PRNP;PTCH1;HTR1B;SHISAL1;NSG1;MAFA;NR2F6;SQLE;MYO5B;CALM1;FGFR3;SNAP25;GPR26;KCNK9;KCNC3;BHLHE41;NRGN;C1QTNF4;SMPD3;TMEM47;ADAMTS2;DBP;HEY1;CAMKV;CRTAC1;NE…
Genes Up-Regulated In Mural Cells Of HD Patients Vs Control PMID32681824	115/493	6.96e-09	3.42e-08	0	0	1.93021	36.2539	CEP126;SPON1;IRS1;FAM13A;ZBTB20;RORA;2900026A02RIK;IGF1R;DOCK10;FAM174B;AKT3;CHORDC1;HABP4;PDK1;MBNL2;COG5;CASK;FOXP1;BCR;TIAM2;ADCY9;KCNQ3;SIK3;ASTN2;FKBP4;ANKRD17;CEMIP;ISYNA1;PFKFB3;ANAPC16;CTBP2;TMTC1;SLC30A10;NDRG2;PHF21A;STK3;STIP1;HSPH1;FLRT2;MAN2A1;D5ERTD579E;CHST15;MAP7;DYM;PIP5K1B;SNX9;TNRC18;SRGAP1;ZBTB7C;ABCA1;CREBBP;CRADD;BICRAL;INSR;CRIM1;ELL2;GULP1;PTPRD;CLK1;ARHGAP32;DLG2;P4HA1;US…
Signaling Protein Genes Bound By Suz12 PMID16630818	126/557	9.53e-09	4.67e-08	0	0	1.85663	34.2897	DGKG;IRS4;RORA;CXCL14;FGF3;HHAT;BMPER;GRB10;HOMER3;SAMD10;PPP1R16B;KCNH3;EPHA4;GHSR;PRKCB;IGFBP3;NPY1R;CSNK1D;DKK2;SFRP4;CCNE1;KCNQ3;TNIK;NPTXR;DGKI;EPHA10;NXPH4;PDGFB;ITPR1;TGFA;GPR83;LTBP2;RASGRP2;CACNA1E;CRHR1;EFNB1;WNT6;ARHGAP20;PCSK1N;FLRT2;HRH3;PENK;PIP5K1B;RAB6A;TAC1;WNT1;BRINP3;DRD4;FZD1;JAG2;WNT10A;GPR12;RASL10A;GADD45B;TNFRSF9;PTCH1;NR2F1;HTR1B;INHBB;NSG1;GRIN2B;DCLK1;GDF7;EFNA3;CALY;IT…
Liver RNA M2 Module (Blue) PMID26900923	132/591	9.68e-09	4.73e-08	0	0	1.82749	33.7231	PLXND1;GIMAP5;ETS2;GIMAP8;RPS6KA3;DACH1;CCND2;FAM174B;RPS6KA2;AKT3;DPYSL3;GRB10;MEF2A;PPP1R16B;GUCY1A2;SEMA6A;LIMCH1;STARD8;SHISA9;ADAM19;TIAM1;COL4A2;DOK4;HECW2;ARMCX6;SLC9A9;ADAM12;FAR1;MAML3;JCAD;KANK3;COL17A1;CTBP2;IGSF3;ACTR3B;ZBTB4;SLC9A1;SLC9A3R2;FAM171A1;TRP53I11;FAM124A;EPB41L2;CHST15;PLXNA1;TNRC18;SKIL;SRGAP1;PLXNA4;TMEM132E;CAV2;PDE2A;CRIM1;RAB27A;INHBB;HSPA12A;ARHGAP33;NBEA;CCDC88C;FA…
Genes Up-Regulated In Genes Changed In HDACi 4B Vs Vehicle Treated Healthy Donor Blood Cells GSE30933	144/660	1.03e-08	5.01e-08	0	0	1.77544	32.6561	CYFIP2;RAB3C;PATJ;SPON1;DGKD;SPARC;SERPINE2;FAM13A;CIB2;ADARB1;FNBP1L;LAPTM4B;RIMS3;PPP4R4;HABP4;ENPP5;TMEM14A;PPFIA3;LZTS3;HES6;PIAS3;PRKCB;FBXO2;GCAT;MTURN;TPST1;SELENOM;FRMD6;DOK4;HECW2;MXRA7;RELL2;FAM8A1;VCL;RTN2;BEX3;ZFP346;ZFP467;ISYNA1;IGSF3;TMEM59L;RASAL1;NDRG2;FBXO44;GOLGA7B;PCSK1N;MAN2A2;TSPAN5;CAMTA1;WNT1;PDZD7;RAI2;RAB11FIP5;JAG2;NDFIP2;SMAD3;H3F3B;JUP;TIPARP;CACFD1;PTCH1;CDC7;HSPA2;F…
Genes Up-Regulated In Friedreich Ataxia iPSCs Expression Vs HUVEC-BF5 Cell Line GSE22651	654/3918	1.08e-08	5.26e-08	0	0	1.32175	24.2455	TLNRD1;ADARB1;SAMD14;ZFYVE27;DPYSL4;PSMD5;ZXDB;AKT3;LIPG;HOMER3;MPV17;IER5;MEF2A;MBNL2;HPCAL1;MRTFA;RC3H2;DKK2;BCR;GPR162;ADCY9;DAAM1;HECW2;ORAI3;MAP1A;FAR1;FAR2;ATF6;PLBD2;VPS28;SKAP2;SLBP;LRPAP1;MEAF6;PNP2;FLII;PDGFB;LYPD1;ENDOD1;AGAP3;TAPBPL;TRP53RKA;FAM171A1;ABR;FLRT2;S100A13;VPS16;S100A10;JAG2;CDK17;NDFIP1;JUP;TIPARP;MTERF2;PLK2;EDEM1;NR2F1;NETO2;GPR137C;RNF103;ARL2BP;GPR180;SFXN3;PAM;CPEB2;…
Genes Up-Regulated In Genes Changed In HDACi 106 Treated Vs Untreated Friedreich Ataxia Patient Blood Cells GSE30933	278/1468	1.14e-08	5.56e-08	0	0	1.50298	27.4824	CYFIP2;SPON1;PATJ;SERPINE2;TMEM200A;PPP2R2A;ADARB1;ZFP606;FNBP1L;PCMT1;RPS6KA3;SAMD14;DPYSL4;PPP4R4;STMN1;NIPAL3;HABP4;ACVR1;RBFOX2;PRKCB;FBXO2;ZFP976;ACSL4;YOD1;GCAT;MTURN;EML4;HECW2;ASPHD2;TRIB3;MXRA7;BEX3;SAR1A;ANAPC16;NEDD4L;GMCL1;FAM171A1;RDH11;SARAF;TSPAN5;EXPH5;RAB11FIP5;JAG2;NDFIP2;LRRN3;H3F3B;TMEM74B;TIPARP;THAP12;CDC7;NETO2;L1CAM;WDR54;SRPK1;NET1;CYLD;CALY;FXYD2;CREBRF;DCHS1;EZH2;ITM2C;…
Genes Up-Regulated In Genes Changed In HDACi 106 Vs Vehicle Treated Friedreich Ataxia Carrier Blood Cells GSE30933	155/725	1.19e-08	5.78e-08	0	0	1.73168	31.5953	CYFIP2;RAB3C;PATJ;SPON1;SPARC;SERPINE2;TMEM200A;ZBTB20;ADARB1;ICAM5;LAPTM4B;TMEM145;SAMD14;RIMS3;CCND2;NIPAL3;HABP4;CAR11;TMEM14A;PPFIA3;LZTS3;PPP1R16B;HES6;PIAS3;FBXO2;KRT2;GCAT;MTURN;EML4;TPST1;SELENOM;FRMD6;DOK4;HECW2;TRIB3;MXRA7;RELL2;VCL;6430571L13RIK;KANK3;RTN2;BEX3;ISYNA1;GLO1;TMEM59L;NEDD4L;NDRG2;FBXO44;RAP1GAP;TMEM121;GOLGA7B;PCSK1N;HLCS;MAP7;WNT1;PDZD7;RAB11FIP5;JAG2;NDFIP2;SMAD3;TMEM74…
Genes Up-Regulated In Friedreich Ataxia iPSCs Expression Vs Control Keratinocytes GSE22651	665/3996	1.28e-08	6.18e-08	0	0	1.31747	23.947	PATJ;PID1;SERPINE2;EMC10;SPINT2;ADARB1;ACCS;DCAF4;GLE1;NDST1;PSMD5;AKT2;PPP4R4;WDR91;LIPG;HOMER3;IER5;MEF2A;MBNL2;RBFOX2;IAH1;HPCAL1;MRTFA;RC3H2;ADCY9;DAAM1;RFX4;ORAI3;ACOT2;ACOT1;FAR1;RABL2;ANKK1;ATF6;ACOT5;PLBD2;ATF3;VPS28;ACOT4;SKAP2;ACOT3;LRPAP1;MTMR3;CTBP1;PNP2;FLII;PDGFB;ENDOD1;AGAP3;TAPBPL;TRP53RKA;FLRT2;HLCS;FLRT3;CHST15;S100A13;SFN;ZBTB7A;VPS16;EXPH5;S100A10;JAG2;B3GALNT2;FZD1;NDFIP2;JUP…
Friedreich Ataxia iPSCs Expression Vs BG02 Cell Line GSE22651	625/3728	1.32e-08	6.4e-08	0	0	1.32583	24.0507	TRIR;TLNRD1;SERPINE2;PNMAL1;WIPF3;RAPH1;ADARB1;ACCS;GCSH;WDR91;LIPG;PWWP2A;IER5;HES6;MED1;IAH1;PRKCB;STARD7;HPCAL1;PHKA1;SOX11;SCAMP1;GPR162;DAAM1;RBP1;FAR1;ASTN2;PLBD2;VPS28;ACOT4;ATF4;SAR1A;ANAPC16;CTBP2;PNP2;PDGFB;ENDOD1;AGAP3;PRDM10;DEDD2;FAM171A1;RHOT2;FAM124A;RIC8B;HLCS;ADAMTS19;FLRT3;EPB41L2;SYNDIG1;CFAP69;CHST15;SFN;ST3GAL2;LHPP;VTI1B;S100A10;JAG2;NDFIP2;ACD;JUP;CADM1;LRBA;PBX2;NETO2;NR2F…
Genes Down-Regulated In Ciliated Ependymal Cells Of R6/2 Vs WT PMID32681824	76/289	1.37e-08	6.61e-08	0	0	2.25285	40.7896	PID1;SPARC;SERPINE2;ATP8A1;MTCL1;WWC1;ZBTB20;LDB2;SLC4A4;PTPRF;NUDT4;CEP128;SYNE1;SYNPR;REV3L;CPNE2;RALGPS2;KIRREL3;SREBF1;KCND3;ACTN1;SLC6A15;ANO6;ITPKB;TIAM1;PTP4A2;PCP4;RFX4;PITPNM3;ARHGEF4;LY6H;ST6GALNAC3;SCN4B;NGEF;SLC24A4;ZFP423;CCDC148;ILDR2;MRO;IQGAP2;TRAK1;FGD4;DNAJB6;FAM184A;CLMN;PENK;LRRC8D;CTNNA3;KCNN3;CKB;ZBTB7C;CDK17;EEFSEC;PLEKHA2;ODF2;CCDC57;KCNIP4;SORBS1;HIPK1;TUBB4B;PLEKHA7;GNAO…
Genes Changed In Pons Of ATXN3 KO Mice GSE117605	260/1359	1.38e-08	6.65e-08	0	0	1.51972	27.5032	CCNK;RPL31;GM21698;WIPF3;RAPH1;TEX47;UBE2L6;SPINT2;ADARB2;ALKBH6;ZDBF2;GOLGA4;NDST3;PWWP2A;SOX9;ATP6V1G2;EPHA6;MBNL2;ZFP976;EML5;DAAM2;HECW2;MAP1A;AKAP9;KCNQ3;ACOT2;SIK3;FAR2;UBA52;SKAP2;BEX2;GM10220;EPB41;PCDH15;ZBTB1;TGFA;STC1;HIF1A;XKRX;MAP7;EXPH5;GM10471;CREBBP;RABGAP1L;ARPP21;LRBA;SMARCA1;GRIN2B;PHC3;HNRNPM;STAG1;CCDC88C;FAT1;ITGBL1;PCDHB5;ANP32B;CPEB2;LIN54;SETD2;GM5141;TENM4;PTPRQ;TCF20;SI…
Genes Up-Regulated In Expression In Expanded CAG Repeats Vs Control ESCs After 6D Of Neuronal Differentiation GSE9760	218/1102	1.44e-08	6.91e-08	0	0	1.57884	28.5085	CYFIP2;LPGAT1;PNMAL1;NEXMIF;STMN4;ZDHHC1;SAMD14;LSM11;DPYSL4;DPYSL3;PWWP2A;SOX9;AGFG2;ZFP286;MED1;9330159F19RIK;COL23A1;CACNA2D2;PHKA1;SOX11;RC3H2;AKAP9;RNF122;NECAB2;EPHA10;EPB41;LYPD1;NEDD4L;6430548M08RIK;SMIM7;ZBTB4;FAM149A;MBTD1;RIC8B;FLRT2;PCDHA1;CHST15;SCN3A;SRPK3;LRRN3;H3F3B;LRBA;PDE2A;HSPA12A;DCLK1;CALY;DCHS1;DMRTC1A;SUGP1;FANK1;TENM1;C2CD5;PTPRO;SIPA1L2;LETM2;SMPD3;C1QTNF4;MED13;TIMP2;NE…
Genes Up-Regulated In iSPNs Of R6/2 Vs WT PMID32681824	72/269	1.49e-08	7.13e-08	0	0	2.30637	41.5688	TENM1;SNAP25;PID1;PCDH11X;ZBTB20;SOBP;GPATCH8;EPB41L4B;NDST3;EP300;ADAMTS6;MLIP;EPHA6;COG5;KCND3;SGIP1;MAGI3;ANO4;ENAH;DNAJC1;NCOR1;OLFM3;CDH12;PHIP;CFAP54;SOS2;VCL;CDH18;CAMK2D;SLC24A3;PCDH10;ANKRD12;PCDH15;PRICKLE2;PPM1H;LIN7A;NYAP2;ZFP804A;ZFP804B;STK3;FGD4;ABLIM1;BTAF1;2210408I21RIK;SNTG1;CCDC85A;1110051M20RIK;TRA2A;TSPAN5;PIP5K1B;PTCHD4;BRINP3;KLHDC10;KCNJ3;CREBBP;MBD5;RANBP17;POU6F2;KLHL1;F…
HD Markers In Human Fibroblasts GSE45516	401/2254	1.51e-08	7.22e-08	0	0	1.40399	25.2847	TLNRD1;A430005L14RIK;DCAF8;ELK1;GPATCH8;NDST1;CNST;HOMER3;MPV17;SAMD10;ZFP286;MEF2A;MBNL2;SCAMP1;EML4;FAR1;ATF6;ATF3;PLBD2;CTBP1;MRPL12;HSPH1;CFAP69;ZBTB7A;SLC19A1;ABCA1;B3GALNT2;PLK3;GPR12;NR1D1;PHC3;WDR54;PKIB;SQLE;ARL2BP;FNDC10;PSMG4;CDK13;GSDME;SNX11;MED16;LYST;PANX2;MED13;UBL3;AIFM2;JAK2;3110082I17RIK;DUSP1;DENND2A;ELOVL6;SIRT3;PHF20L1;SIKE1;MBLAC1;BDH1;MTF2;SLC29A1;PAFAH1B3;GAS7;ZFP148;AHNA…
Genes Up-Regulated In Friedreich Ataxia iPSCs Expression Vs IPS-F-5-hFib2-Ips5 Cell Line GSE22651	441/2515	1.63e-08	7.78e-08	0	0	1.38302	24.8013	WIPF3;SPINT2;ACCS;DCAF5;DCAF4;ZFYVE27;DPYSL3;ANKS1B;IAH1;NHLRC3;STARD7;COL23A1;CACNA2D2;PHKA1;ADCY9;MAP1A;ASPHD2;FAR1;PLBD2;SF1;MTMR3;CTBP1;FLII;PDGFB;PRDM15;AGAP3;TRP53RKA;FAM171A1;RHOT2;PCDHA1;EPB41L1;SYNDIG1;CHST15;RREB1;SLC19A1;S100A10;JAG2;NDFIP2;JUP;GTF2IRD2;SETD1B;LRBA;THAP12;NR2F6;CYLD;CPEB1;PCDHB6;SFXN4;PAM;CPEB2;PHF2;CDKN1A;SETD2;ARHGAP1;TCF20;MED16;SHB;JPH4;TMSB4X;TIMP2;GPR137;TNKS1BP1…
Genes Down-Regulated In Expression In PC12 Cells With nonSUMOylatable AR112Q (KRKR) Upon Ligand Stimulation GSE50383	39/112	1.69e-08	8.07e-08	0	0	3.35488	60.0329	HCN4;CHRNA7;CELF3;RGS4;BRINP2;HRH3;HEY1;CLMN;CDH22;KCNN3;STK32A;SCN3B;ZSWIM5;TBC1D16;BOK;SLC18A3;LMO1;KLF10;TUB;CADM1;FAM78A;AGL;NPY1R;ATP2B4;ANO6;L1CAM;MYT1;RHOB;SYT17;CPEB1;SLC7A6;MEIS1;PDE10A;CSDC2;KIF26B;KCNMA1;KCNQ3;DGKH;SPSB4
Friedreich Ataxia iPSCs Expression Vs ES4CL2 Cell Line GSE22651	644/3863	1.82e-08	8.64e-08	0	0	1.31776	23.488	TRIR;PATJ;SERPINE2;WIPF3;SPINT2;ACCS;FNBP1L;GCSH;SAMD14;DPYSL4;ZXDB;DPYSL3;STMN1;PKNOX1;IER5;ZFP286;ANKS1B;UNC13B;RNF138RT1;MED1;PRKCI;STARD4;WSB2;NHLRC3;COL23A1;HPCAL1;SOX11;SCAMP1;FRS3;BCR;ORAI3;RBP1;FAR2;PLBD2;VPS28;ACOT4;SKAP2;SF1;ATF4;SAR1A;CTBP2;MEAF6;CTBP1;PNP2;PDGFB;LYPD1;FIGNL2;AGAP3;PRDM10;HIF1A;DEDD2;RIC8B;FLRT2;FLRT3;EPB41L2;SYNDIG1;SFN;RREB1;VTI1B;S100A10;JAG2;NDFIP2;ACD;JUP;NEBL;LRB…
Genes Changed In WT Mice Treated With AAV9-Eif2a-Nme1-EF2a-GFP Vs Control GSE141856	29/71	1.99e-08	9.43e-08	0	0	4.32794	76.7543	CREBZF;SAMD5;RIPOR2;CCNT2;SERPINE2;TENM4;CELF3;HPCA;STRN4;RHOBTB2;TMSB4X;CHORDC1;CAR11;ME3;ERC2;COX8A;TSNAX;MBD5;YLPM1;ANO3;NME1;CYLD;NBEA;XRN2;PPP1R1B;BCL2;SSBP2;PTPN5;ITM2C
NP3 Neural Progenitor Cell-Enriched Genes PMID30078729	546/3212	2.17e-08	1.03e-07	0	0	1.34046	23.6528	PID1;RPL31;A430005L14RIK;RAPH1;DCAF8;WDR83;STMN4;FNBP1L;GPATCH8;NDST1;SAMD14;DPYSL4;AKT2;4921524J17RIK;DPYSL3;STMN1;MPV17;MBNL2;RBFOX2;IAH1;9330159F19RIK;CACNA2D2;SOX11;SCAMP1;RC3H2;EML4;DAAM1;MAP1A;FAR1;UBA52;VPS28;SF1;ATF4;SLBP;LRPAP1;MTMR3;SAR1A;ANAPC16;CTBP2;CTBP1;NEDD4L;WDR61;HIF1A;ANAPC11;ABR;RDH11;FLRT3;PRKAR2B;VPS16;CDK17;CREBBP;PRPF38B;NDFIP2;NDFIP1;CADM1;TIPARP;NCAPH2;SETD1B;PLK2;NR2F1;…
Telencephalic Interneuron Gene Module PMID19638972	36/100	2.21e-08	1.04e-07	0	0	3.53028	62.2363	SPON1;CEBPB;GALNT16;PRKX;COL19A1;PTGS1;PPP3CB;SRR;EPB41L2;CHN2;STX6;PIP5K1A;PMEPA1;METTL8;SKIL;ARL5A;RGS7;UNC13B;EPHA4;LINGO1;KCNIP1;MMD;GOLM1;KCNJ9;GFPT2;PPP2R5A;SORBS1;MTSS1;FOXP1;ARL4C;SLC7A4;KLF9;PKP2;VSTM2A;CDS2;HBEGF
Genes Changed In Inferior Olive Of 12 Week Old Atxn1[154Q/2Q] Vs WT GSE122099	125/559	2.22e-08	1.05e-07	0	0	1.82814	32.2147	CPNE9;KCNG4;SPARC;HR;MSMO1;SLC4A4;CXCL14;LAMP5;STMN1;RESP18;HOMER3;SLC12A6;SCN1B;KCNH2;KIRREL3;KCNH3;UNC13A;PAQR7;FBXO2;HPCAL1;PHKA1;SLC6A11;ATP1B1;PCP4;UBA52;NGEF;NECAB2;NECAB3;CABP7;INSIG1;NXPH4;LYPD1;PCDH15;AK4;NDRG2;CACNA1G;PGS1;ENHO;STIP1;ATXN1;HRH3;PENK;CDH22;GSG1L;KCNN2;SCN3A;NTSR2;ABCA1;FZD1;PRNP;TGFB3;PTCH1;HTR1B;SHISAL1;NSG1;MAFA;NR2F6;SQLE;MYO5B;CALM1;FGFR3;SNAP25;RBM28;CNTNAP1;GPR26;K…
FOXP1 Up-Regulated Genes In Human Neural Cells GSE62718	118/520	2.34e-08	1.1e-07	0	0	1.86177	32.7158	RAB3B;RIPOR2;DGKD;TMEM200A;OGDHL;BZW2;CXCL14;HS6ST2;CLEC18A;RGS4;SOX3;BASP1;KIFAP3;PDK1;KIRREL3;MREG;PRKCB;STARD8;IGFBP3;HPCAL1;ISLR2;ACSL4;FOXP1;TIAM1;MYCL;PCP4;SLC9A9;KCNQ3;NPTXR;RIN1;OSBP2;ADCYAP1R1;PNP2;FBLIM1;SLC1A1;PDGFB;STC1;AK4;TMTC1;HIF1A;ACTR3B;ABR;ARHGAP20;ASIC4;GRK3;EPB41L2;STC2;SFN;PDZD7;S100A10;ZBTB7C;TMEM132E;IQSEC3;DDIT4L;NSG1;SYNJ2;FBXO32;PKIB;SDC1;TUBA8;SRPX;THRB;BNC2;GBE1;CELF3…
Genes Up-Regulated In Myotonic Dystrophy 1 Markers In Human Skeletal Muscle E-D-7014	418/2373	2.41e-08	1.14e-07	0	0	1.38791	24.3436	CYFIP2;PATJ;PNMAL1;WIPF2;XYLT2;RAPH1;DCAF8;ADARB1;DCAF5;GPATCH8;ZDBF2;ZXDB;AKT3;RAVER2;PWWP2A;ANKS1B;MEF2A;UNC13B;MED1;MBNL2;RBFOX2;NHLRC3;PHKA1;SCAMP1;RC3H2;EML4;EML5;DAAM1;ORAI2;MTMR3;SAR1A;ANAPC16;ABCB4;ENDOD1;NEDD4L;TAPBPL;PRDM10;ABR;FLRT2;EPB41L2;ZFP180;D5ERTD579E;ST3GAL2;ABCA1;B3GALNT2;MYH7B;PRPF38B;NDFIP1;ARPP21;H3F3B;LRBA;PHC3;CYLD;FAT1;NAPEPLD;SFXN4;CDK13;CPEB2;BHLHE41;TMEM47;TUBA1B;MED1…
Genes Up-Regulated In Genes Changed In HDACi 4B Vs Vehicle Treated Friedreich Ataxia Patient Blood Cells GSE30933	145/675	2.59e-08	1.22e-07	0	0	1.73975	30.3899	CYFIP2;PATJ;SPON1;SPARC;SERPINE2;TMEM200A;XYLT2;ZBTB20;ADARB1;ICAM5;PPP1CB;PCMT1;LAPTM4B;SAMD14;CNST;RIMS3;HABP4;TMEM14A;PPFIA3;LZTS3;PPP1R16B;KCNH3;PIAS3;AGTPBP1;PRKCB;FBXO2;KRT2;ZFP976;MTURN;EML4;TPST1;SELENOM;FRMD6;TRIB3;MXRA7;RELL2;VCL;6430571L13RIK;KANK3;RTN2;BEX3;ZFP346;ISYNA1;ANAPC16;ARL3;TMEM59L;FBXO44;DNAJC28;GOLGA7B;FAM171A1;PCSK1N;SARAF;CAMTA1;PDZD7;RAB11FIP5;JAG2;NDFIP2;SMAD3;BCL11B;T…
Genes Down-Regulated In Friedreich Ataxia iPSCs Expression Vs HMSC-ad Cell Line GSE22651	712/4332	2.68e-08	1.26e-07	0	0	1.29999	22.6643	CYFIP2;PATJ;PNMAL1;WIPF3;WDR83;SPINT2;FNBP1L;GCSH;COMTD1;PPP4R4;4921524J17RIK;STMN1;PKNOX1;ZFP286;ANKS1B;UNC13B;RNF138RT1;HES6;MED1;PRKCI;PRKCB;STARD7;DDX11;COL23A1;CACNA2D2;SOX11;SYTL5;GTPBP3;EML4;ZC2HC1C;FAR2;ASTN2;UBA52;ATF3;NGEF;SF1;ATF4;PIF1;CTBP2;FIGNL2;NEDD4L;IQGAP2;C9ORF72;DEDD2;XKRX;FAM124A;HSPH1;RIC8B;TERT;ADAMTS19;EPB41L2;D5ERTD579E;LDHD;SYNDIG1;RRS1;CHST15;PIP5K1B;CFAP65;SLC19A1;VTI1B…
Genes Up-Regulated In dSPNs Of zQ175DN Vs HdhQ20 PMID32681824	91/373	2.84e-08	1.33e-07	0	0	2.04056	35.462	TXN1;DPP10;RBM28;TRAM1;ABCD2;TSEN15;PCDH11X;TONSL;FAIM2;SAT2;CXCL14;GCSH;GPI1;LAPTM4B;SAMD14;APMAP;AIFM2;TMSB4X;DPYSL3;NDST3;TIMP2;FAM3C;GGACT;LGALS8;GPRASP2;CAST;HES6;PHYH;HSDL2;ENTPD5;IFNGR2;ANKRD45;CIRBP;AKR1A1;ADGRA3;B630019K06RIK;SOX11;SYP;ATP1B1;FAHD2A;ENAH;ARL4C;TMX4;TUBB2A;RCN2;TNNT2;MORF4L2;GEMIN7;ERGIC3;SPACA6;CDH18;SKAP2;BEX3;BEX2;DDX5;CAMK2D;PCDH10;ENDOD1;ILDR2;GLRX;MRO;NDRG2;FBXO44;S…
Genes Down-Regulated In Expression In Hippocampus Of 10 Wk N171-82Q HD Mice GSE44306	31/80	2.86e-08	1.34e-07	0	0	3.96678	68.8972	CPNE9;CABP7;WIPF3;GPR63;IQGAP2;LYST;DDN;RASD2;STRIP2;BRINP1;CAMKV;ENC1;PENK;PTK2B;HOMER3;WASF1;GABRD;GIT1;CAP2;KCNH3;TRPC6;PLK5;RASL10A;PLEKHA2;HTR1B;KCTD4;ANO3;MYO5B;GPD1;PLCH2;KCNK4
Genes Down-Regulated In Meclizine Treated STHdhQ111 Vs Control GSE129143	289/1551	2.89e-08	1.35e-07	0	0	1.47319	25.5741	SPARC;WIPF2;SCX;ICAM5;DCAF5;NUDT4;CNST;AKT3;DAG1;PTGFRN;KIFAP3;ACVR1;RBFOX2;LIMCH1;ACTN1;FBXO2;DDX11;MRTFA;ZFP618;BCR;TIAM2;DAAM2;MAP1A;ORAI2;SIK3;RNF122;PIF1;CTBP2;MAGED1;FLII;TGFA;IQGAP2;PPL;STRIP1;RACGAP1;FLRT2;PRKAR2B;PCBP4;EPB41L2;D5ERTD579E;CHST15;S100A13;TSPAN5;TNRC18;SNX9;TSPAN3;N4BP3;ST3GAL2;RAB11FIP4;S100A10;STAT5A;ABCA1;FZD1;EGR1;WNT10A;JUP;SETD1B;LRBA;PARVA;ELL2;PHC3;GLUD1;SLC6A6;PTK7…
Down-regulated Genes In Pons Of ATXN3 KO Mice GSE117605	239/1241	3.13e-08	1.46e-07	0	0	1.52864	26.4133	CCNK;RPL31;GM21698;WIPF3;RAPH1;TEX47;ADARB2;ALKBH6;ZDBF2;GOLGA4;NDST3;PWWP2A;SOX9;ATP6V1G2;EPHA6;MBNL2;ZFP976;EML5;DAAM2;HECW2;MAP1A;AKAP9;KCNQ3;ACOT2;SIK3;FAR2;UBA52;SKAP2;BEX2;GM10220;EPB41;PCDH15;ZBTB1;TGFA;HIF1A;XKRX;MAP7;EXPH5;GM10471;CREBBP;RABGAP1L;ARPP21;LRBA;SMARCA1;GRIN2B;PHC3;HNRNPM;STAG1;CCDC88C;FAT1;ITGBL1;PCDHB5;ANP32B;CPEB2;LIN54;SETD2;GM5141;TENM4;PTPRQ;TCF20;SIPA1L3;WDR44;AKAP13;…
Genes Down-Regulated In Pons Of 28 Week WT Mice Vs Atxn 1 154Q/2Q Mice Both Treated With Vehicle GSE114674	288/1546	3.13e-08	1.46e-07	0	0	1.47254	25.4433	NEXMIF;PPAN;XYLT2;WDR83;ZFP606;DCAF5;ELK1;GBA2;IKZF5;SOX3;FRAT1;SAMD14;DPYSL4;LGALS8;PDK1;ZFP286;ANKS1B;ARL10;MEF2A;METTL2;KRT1;RSAD1;CIRBP;SOX11;GPR165;NEIL2;SPATA13;XRN2;ACOT2;SPIN2C;ACOT1;MAML3;CCDC82;CCNO;SF1;LRPAP1;MTMR3;MEAF6;IGSF3;MAGED1;PCDH10;ABCB4;PCDH15;TAPBPL;PPL;FAM149A;DEDD2;STRIP1;DHX32;PRRC1;RACGAP1;ADAMTS19;D5ERTD579E;PIP5K1A;N4BP2;VPS16;STAT5A;ABCA1;CREBBP;CADM1;H3F3B;BCL11B;GTF…
Genes Changed In HDACi 106 Vs Vehicle Treated Friedreich Ataxia Patient Blood Cells GSE30933	713/4343	3.17e-08	1.47e-07	0	0	1.29791	22.4114	CYFIP2;POP5;PATJ;SERPINE2;TMEM200A;ADARB1;ACCS;FNBP1L;ALKBH6;GLE1;PCMT1;COMTD1;SAMD14;CNST;PPP4R4;ZXDB;WDR91;STMN1;HOMER3;MPV17;HES6;MED1;PRKCI;MBNL2;RBFOX2;PRKCB;STARD8;COL23A1;HPCAL1;MRTFA;GTPBP3;EML4;GPR162;DAAM1;ARMC6;HECW2;ORAI3;RBP1;ACOT2;ACOT1;ASPHD2;ENTHD1;RABL2;ACOT5;PLBD2;VPS28;RNF122;SKAP2;ACOT3;LRPAP1;MTMR3;SAR1A;ANAPC16;FLII;PDGFB;NEDD4L;WDR61;AGAP3;TAPBPL;MRPL12;C9ORF72;HIF1A;ANAPC1…
Genes Changed In WT Treated With PLX3397 Vs Control GSE136158	507/2962	3.19e-08	1.47e-07	0	0	1.34765	23.2627	POP5;PATJ;RPL31;NEXMIF;RAPH1;EMC10;STMN4;ADARB2;SLC4A4;DCAF4;GLDN;ZDBF2;IER5;MBNL2;IAH1;WDR73;SYTL5;RC3H2;RBP4;DAAM1;FAR1;ASPHD2;NGEF;ZBTB8A;ANAPC16;AGAP3;NYAP2;MRPL12;HIF1A;FAM149A;FLRT2;EPB41L2;GSG1L;LHPP;VPS16;EXPH5;VTI1B;ZBTB7C;S100A10;ABCA1;ACD;PLK5;JUP;NEBL;POU6F2;THAP12;PHC3;GRIN2B;WDR54;GPR137C;FXYD2;GIPC2;PSMG4;CDK13;CPEB2;SETD4;LIN54;ZFP367;SHB;MED16;LYST;WDR44;C1QTNF4;TMEM47;MED13;SH3B…
Genes Down-Regulated In Human Granule Cells Vs Basket Cells GSE101912	146/683	3.21e-08	1.48e-07	0	0	1.72885	29.8285	PNMT;RAB3B;RIPOR2;KCNG4;GALNT16;WWC1;GDE1;DCAF8;STMN4;TEX47;RORA;ADARB2;1110065P20RIK;GLDN;PTPDC1;RGS4;CCND2;RGS3;FAM174B;PPP4R4;LIPG;TOM1;CHP1;HOMER3;EPHB2;ANKRD13A;AGFG2;CHRNB2;KIRREL3;NANOS1;MIGA2;IGFBP3;FBXO2;ZBTB37;ISLR2;WDR73;VRK3;EML5;DISP3;CARHSP1;OBSCN;DAAM2;SLC9A7;MAP1A;ADGRB1;SPATA13;ADAM12;DDX5;PFKFB3;SHC3;IGSF3;PCDH10;ARL3;SLC1A1;TMTC1;BHLHE22;RCC1L;NKAIN2;GRK5;HRH3;MAN2A2;VILL;RAB6A…
HD-specific Set Of Genes (Cluster 2) PMID28499347	171/831	3.6e-08	1.66e-07	0	0	1.65111	28.3005	ANKRD39;KCNG2;SH3GL3;RAB3C;PLXND1;GALNT16;WWC1;SCX;RNF19B;UBE2L6;AQP5;METRNL;CXCL14;NUDT4;RGS4;FAM162A;AKT3;RESP18;PIM1;SLC16A3;TGM3;AGFG2;RGS7;STARD4;TLE2;CHRNB4;DGAT2;PRKCB;ACTN1;MFSD12;EML5;RBP4;CACNB3;DOK4;ASPHD2;TLN2;PDE9A;KCTD16;DGKH;NECAB2;SLBP;ISYNA1;PKDCC;ARHGEF28;NXPH4;SLC35D3;CREM;TMEM121;GOLGA7B;TRP53I11;FAM171A1;BRINP2;KLC3;ASIC4;PRRC1;GRK5;KIF3A;STC2;PMVK;RHPN1;KCNN3;SCN3B;KLHDC10;P…
Genes Down-Regulated In HD Fibroblasts Treated With ZFP-C Vs Control GSE127820	213/1084	3.71e-08	1.7e-07	0	0	1.56384	26.7586	LPGAT1;TMEM200A;PITPNA;RAPH1;ELK1;SLC4A4;NUDT4;ZFYVE28;NDST1;OGFOD1;DPF1;HOMER3;EPHB2;AGFG2;FBXO9;EPHA4;WSB2;STARD7;LIMCH1;RSAD1;HPCAL1;FNDC4;HECW2;CSNK2B;MAP1A;ORAI2;SIK3;KDELR2;KCTD12;MXRA7;PNP2;MAGED1;NEDD4L;STC1;C9ORF72;PRDM10;SEC14L2;ABR;FAM171A1;HSPH1;PCDHA1;D5ERTD579E;DYM;SLC19A1;ST3GAL2;VTI1B;EGR1;ZFP638;EDEM1;THAP12;DDIT4L;NETO2;GPR137C;SRPK1;PEMT;CALM1;LIN54;SRPX;CITED4;PCSK9;IDE;SIPA1L…
Friedreich Ataxia iPSCs Expression Vs Mel1 P52 Cell Line GSE22651	627/3768	4.08e-08	1.87e-07	0	0	1.31167	22.3184	CYFIP2;PATJ;WIPF3;SPINT2;ACCS;FNBP1L;ALKBH6;GLE1;GCSH;SAMD14;PSMD5;PPP4R4;WDR91;PWWP2A;HOMER3;MPV17;PKNOX1;IER5;UNC13B;RNF138RT1;PRKCI;IAH1;WSB2;DDX11;CACNA2D2;SOX11;GTPBP3;BCR;ZC2HC1C;GPR162;ORAI3;ACOT2;ACOT1;ASPHD2;FAR2;RABL2;ACOT5;PLBD2;VPS28;ACOT4;ATF4;ACOT3;LRPAP1;MTMR3;SAR1A;CTBP1;FLII;FIGNL2;AGAP3;C9ORF72;DEDD2;FAM171A1;RHOT2;RIC8B;HLCS;EPB41L1;RDH11;FLRT3;EPB41L2;1110051M20RIK;VPS16;VTI1B…
Down-regulated Soluble Proteins In Cerebral Cortex Of 8 Wk R6/2 Mice PXD004973	157/752	4.99e-08	2.29e-07	0	0	1.67909	28.2295	DGKB;CLSTN1;PPP2R2A;FAIM2;ICAM5;SLC8A2;TXN2;PPP1CC;DPYSL4;PSMD5;BASP1;FAM162A;FRRS1L;STMN1;DAG1;HABP4;COTL1;EPHB2;MEF2A;EPHA4;SEMA6A;ATP6V1G2;KIRREL2;ACTN2;ACTN1;CMC2;PPP1R16A;TPM1;CASK;SCAMP1;POU3F4;GPR162;CARHSP1;PCP4;GPRIN1;MAP1A;CSNK2B;PLAA;RELL2;LY6H;NGEF;SF1;ANKRD17;IGSF8;BRSK2;CCDC149;CTBP1;TMEM121B;SDC3;LIN7A;6430548M08RIK;AGAP3;MRPL12;SLC9A3R2;FUT8;PCSK1N;GRK2;EPB41L1;D5ERTD579E;NEU1;CAS…
Genes Down-Regulated In HD Grade 4 Markers In Human Caudate Nucleus (HG-U133B) GSE3790	54/186	5.07e-08	2.32e-07	0	0	2.57425	43.2404	CHRM1;ONECUT2;WIPF3;ZFYVE28;C1QTNF4;EPB41L4B;PANX2;ANKS1B;CHRNB2;TLE4;KCNH3;DGAT2;SHISA9;SHISA7;FOXP1;TIAM2;SFPQ;OBSCN;ASPHD2;DENND6B;SOWAHA;ARHGEF7;NAT8L;SHANK3;SPTBN4;BRSK2;TMEM63C;DCAF12L2;DCAF12L1;ZDHHC23;TMTC1;CACNA1E;RASD2;REPIN1;ARHGAP20;ERICH3;SUSD4;NCDN;MTA3;RAB11FIP4;FKRP;BCL11B;RASL10B;KCNIP2;DAB2IP;TTC9B;NETO2;FBXL16;PNKD;LPCAT4;MGAT4A;FNDC10;PTPN5;KCNK4
Genes Up-Regulated In Genes Changed In HDACi 106 Vs Vehicle Treated Friedreich Ataxia Patient Blood Cells GSE30933	419/2396	5.6e-08	2.56e-07	0	0	1.37435	22.9494	CYFIP2;PATJ;SERPINE2;TMEM200A;ADARB1;FNBP1L;PCMT1;SAMD14;CNST;PPP4R4;ZXDB;STMN1;HES6;MED1;PRKCI;MBNL2;RBFOX2;PRKCB;GTPBP3;EML4;DAAM1;HECW2;ASPHD2;ENTHD1;RNF122;MTMR3;SAR1A;ANAPC16;NEDD4L;C9ORF72;HIF1A;FAM171A1;RIC8B;RDH11;D5ERTD579E;EXPH5;S100A10;PRPF38B;NDFIP2;NDFIP1;H3F3B;TIPARP;LRBA;THAP12;CDC7;NETO2;L1CAM;WDR54;CYLD;GPR180;FXYD2;DCHS1;EZH2;LIN54;LYST;LRRC1;PANX2;TRIM9;FAM102B;ADAMTSL5;TMEM44;…
Locuses With Decreased DNA Methylation In Frontal Lobe Region Of AD Vs Control GSE72778	101/433	5.73e-08	2.61e-07	0	0	1.92523	32.1047	COL16A1;IRS1;PCDH11X;RORA;SLC8A2;IGF1R;UROD;RAVER2;CHP1;IER5;MAP2K3;KIRREL3;CPA2;RBFOX2;MREG;WSB2;CSNK1D;ALG1;CMBL;ADAM19;CACNB2;ADCY9;RFX4;ADGRB1;EHBP1L1;ORAI2;ASTN2;RIN1;SPTBN4;INTU;ARHGEF28;RASAL1;CACNA1G;RRS1;MAP3K20;TNRC18;DRD4;CRADD;AUTS2;TIPARP;TGFB3;SETD1B;NEK6;BTBD6;GULP1;DAZL;MEX3A;MUS81;KDM5C;PCDHGB6;CELF1;PHF1;LAMC1;MFSD8;CRTAC1;TMSB4X;PRADC1;ENC1;ME3;HRAS;PCDHGA8;PRMT8;PCDHGA6;SORD;C…
Genes Down-Regulated In Friedreich Ataxia iPSCs Expression Vs HMSC-bm Cell Line GSE22651	580/3461	5.79e-08	2.63e-07	0	0	1.31836	21.9706	CYFIP2;PATJ;WIPF3;WDR83;SPINT2;FNBP1L;ZDBF2;GCSH;COMTD1;GJA3;PPP4R4;4921524J17RIK;PWWP2A;ZFP286;ANKS1B;UNC13B;RNF138RT1;HES6;PRKCI;UNC13A;PRKCB;STARD7;DDX11;CACNA2D2;GTPBP3;DAAM1;ARMC6;ASTN2;UBA52;ATF3;NGEF;ATF4;PIF1;SAR1A;FIGNL2;IQGAP2;C9ORF72;DEDD2;FAM124A;RIC8B;TERT;ADAMTS19;EPB41L2;LDHD;RRS1;PIP5K1B;LHPP;VTI1B;PRPF38B;H3F3B;NEBL;PBX2;CDC7;EIF2AK4;INO80;DAZL;SLC6A6;GLUD1;FXYD2;PCDHB6;DCHS1;GST…
Friedreich Ataxia iPSCs Expression Vs HSF6 Cell Line GSE22651	705/4306	6.24e-08	2.84e-07	0	0	1.29142	21.4234	CYFIP2;TRIR;PATJ;WIPF3;RAPH1;TEX47;FNBP1L;GCSH;PPP4R4;RAVER2;WDR91;LIPG;STMN1;HES6;MED1;PRKCI;STARD4;IAH1;WSB2;PRKCB;STARD7;CACNA2D2;MRTFA;SOX11;SCAMP1;FRS3;BCR;DAAM1;FAR1;FAR2;RABL2;ASTN2;PLBD2;ATF3;VPS28;NGEF;SF1;ATF4;MTMR3;ANAPC16;MEAF6;FLII;PDGFB;NEDD4L;IQGAP2;PRDM10;DEDD2;TRP53RKA;FAM171A1;ABR;RIC8B;HLCS;RDH11;FLRT3;EPB41L2;LDHD;CHST15;SFN;RREB1;SLC19A1;LHPP;VPS16;EXPH5;VTI1B;S100A10;JAG2;AB…
Genes Down-Regulated In HD Markers In Mouse STHdh Cells GSE11358	700/4273	6.48e-08	2.94e-07	0	0	1.29184	21.3821	PID1;A430005L14RIK;RAPH1;SCX;WDR83;ACCS;ELK1;DCAF4;GLE1;NDST1;PCMT1;COMTD1;SAMD14;CNST;GJA3;PSMD5;ZXDB;AKT3;DPYSL3;WDR91;STMN1;HOMER3;IER5;SAMD10;ANKS1B;HES6;STARD4;WSB2;DDX11;HPCAL1;PHKA1;B630019K06RIK;SOX11;DAAM1;ACOT1;FAR1;SF1;ATF4;SLBP;PIF1;CTBP2;TARSL2;PNP2;PDGFB;ENDOD1;WDR61;MRPL12;FAM149A;ANAPC11;FAM171A1;FLRT2;RDH11;EPB41L2;ZFP180;1110051M20RIK;RRS1;SLC19A1;VTI1B;S100A10;SLC19A2;JAG2;B3GA…
Genes Down-Regulated In NPCs After HTT Knock Down GSE118088	114/507	6.77e-08	3.06e-07	0	0	1.83806	30.3422	PNMT;CPNE7;HR;FAIM2;COMT;CDH8;HS6ST2;CLEC18A;LAMP5;SYNPR;DACH1;FRRS1L;DPYSL3;IER5;SLC16A3;KCNH2;LMO1;NANOS1;EPHA4;CHRNB4;UNC13A;FIBCD1;ATP1B1;OLFM2;OLFM3;NEIL2;SLC9A7;STIM2;ADAM12;KCTD12;OSBP2;KCTD16;BEX2;PCDH10;PCDH15;STC1;AK4;GPR83;NTS;GLIS1;NKAIN2;ASIC4;BRINP2;C7;ZMAT3;ZMAT4;GRIA3;JAG2;NEBL;IQSEC3;NR2F1;INHBB;NSG1;HSPA2;DCLK1;REEP1;ITGA11;CNTN3;PRRT4;FGFR3;ITM2C;ACVRL1;COL14A1;DIRAS1;AFF3;RYR3…
Alzheimer Disease Down-Regulated Genes In CA1 Area Of Hippocampus Blalock PMID14769913	253/1339	6.78e-08	3.06e-07	0	0	1.49355	24.6545	RPL31;UXS1;PITPNA;SPINT2;PCMT1;MPV17;CCNL1;EPHB2;LGALS8;KIFAP3;MEF2A;MCCC2;EPHA4;PRKCI;ATP6V1G2;PRKCB;ACTN1;SCAMP1;ADCY9;ADGRB2;SUB1;MAP1A;ACOT2;ACOT1;KDELR2;ACOT5;SKAP2;ACOT3;BEX3;BEX2;MAGED1;ABCB4;MGST3;WDR61;ACTR3B;PGS1;DGUOK;HSPH1;FLRT2;PCDHA1;PRKAR2B;RDH11;PENK;PIP5K1B;KCNN2;TSPAN3;SCN3B;SCN3A;CDK17;NDFIP1;LRRN3;BCL11B;PLK2;PDE2A;NETO2;L1CAM;GLUD1;ADI1;CALM3;CALM1;PAM;CDS2;PCSK2;ACHE;GASK1B;…
Alzheimer Disease Up-Regulated Genes In CA1 Area Of Hippocampus Liang PMID18270320	233/1215	6.78e-08	3.06e-07	0	0	1.51889	25.072	CMAS;RAPH1;HTR4;SLC4A4;PTPDC1;IKZF5;AI593442;PWWP2A;SOX9;PKNOX1;ANKS1B;RBFOX2;COG5;CMBL;THAP1;TIAM2;GAREM1;DAAM1;ORAI2;ASPHD2;KCTD12;SF1;NAA60;TMEM161A;ZFP503;ZBTB1;HNRNPLL;ZBTB4;HIF1A;SEC14L1;FLRT2;PCDHA1;FLRT3;ZBTB7A;RAB11FIP3;SMIM10L2A;CREBBP;PRPF38B;CADM1;BCL11B;GTF2IRD2;SETD1B;GREB1;IQSEC3;NR2F1;DELE1;NR1D1;L1CAM;CDAN1;GPR180;CREBRF;DCHS1;GRB2;ANP32B;NOL12;CDK13;HRK;GASK1B;SETD2;AHCTF1;PHF1;…
Liver RNA M10 Module (Purple) PMID26900923	64/238	7.65e-08	3.44e-07	0	0	2.31736	37.9728	PCSK2;DPP10;RAB3C;SNAP25;DGKB;CELF3;STMN4;FAIM2;OGDHL;ICAM5;SLC8A2;NRGN;JPH4;RGS4;TRIM9;CAMKV;PHACTR3;NEFL;NEFM;ZFP365;STUM;PPFIA3;ANKS1B;RGS7;UNC13A;SGIP1;ELMOD1;SLC6A11;SYP;TMEM130;SHISA7;PCP4;ADGRB2;SNPH;ADGRB1;NAT8L;SCN4B;SHANK1;SLC24A2;BEX2;BRSK2;PCDH10;KCNA1;HPCA;TMEM59L;PTN;BEGAIN;DDN;GOLGA7B;PENK;CHN1;CAP2;TUB;ARNT2;ARPP21;FBXL16;6330403K07RIK;DCLK1;GNAO1;DLG2;GLRB;FAM131B;RIMBP2;PTPN5
Glutamatergic Neuron Gene Module M10 From Cerebral Cortex PMID18849986	109/480	7.67e-08	3.45e-07	0	0	1.86059	30.4826	RAB3A;ICAM5;RPS6KA4;BASP1;CAR11;KIF21B;CAST;AGTPBP1;MINPP1;ACAP2;CACNB3;FNDC4;DMTF1;ADGRB2;ARMC6;MORF4L2;EHBP1L1;TLN2;NPTXR;FAM8A1;NECAB2;RTN2;ZCCHC8;DDX5;ISYNA1;CTBP2;PEF1;HPCA;TMEM59L;RAP1GAP;RHOT2;EPB41L1;DDRGK1;ISOC1;PLXNA1;SCN3B;ZBTB7A;RAB11FIP3;SYT5;KLHDC3;PRNP;RASL10A;GREB1;IQSEC3;ARHGAP33;NSFL1C;EFNA3;CALY;RIOX2;CALM3;OSBPL1A;CALM1;RETREG2;PCSK2;CNTNAP1;AHCTF1;CLTB;ARRB2;CHD3;NRGN;GPI1;TR…
Up-regulated Genes In Hippocampus Of 10 Mon HD Q175 Mice Vs Q20 GSE73503	125/571	7.95e-08	3.57e-07	0	0	1.77769	29.0604	ANKRD39;WDSUB1;PCDH11X;HR;SPINT2;ZDBF2;DPYSL3;STMN1;NIPAL3;GRB10;TRIM26;CAST;CHRNB4;SEMA6A;SLC6A15;RSAD1;CIRBP;TRP73;SOX11;TBC1D2B;MYT1;MTURN;TMEM252;SLC9B2;GPR165;OLFM2;CARHSP1;RNF122;CDKL1;IGSF3;KLHL14;PCDH10;CHRNA4;HVCN1;ZFP503;PCDH15;STC1;TGFA;TMTC1;LTBP2;KLHL13;PPL;CACNA1G;RACGAP1;HLCS;STC2;MAP3K20;VILL;N4BP2;SCN3A;BRINP3;RAI2;TBC1D16;ABCA1;PPP1R26;VAT1;CBX8;SRPK3;TMEM132E;OSBPL5;CCDC136;SYT…
Genes Up-Regulated In Friedreich Ataxia iPSCs Expression Vs HUVEC-BF4 Cell Line GSE22651	714/4374	8.11e-08	3.63e-07	0	0	1.28686	21.011	TLNRD1;WIPF3;ADARB1;GLE1;SAMD14;ZFYVE27;PSMD5;ZXDB;AKT3;WDR91;LIPG;HOMER3;MPV17;IER5;MEF2A;MBNL2;RBFOX2;IAH1;DDX11;HPCAL1;MRTFA;UPB1;BCR;GPR162;ADCY9;DAAM1;HECW2;RFX4;MAP1A;ORAI2;SPIN2C;ACOT2;ACOT1;FAR1;FAR2;RABL2;ATF6;ACOT5;PLBD2;VPS28;SKAP2;ACOT3;LRPAP1;CTBP2;MEAF6;PNP2;FLII;PDGFB;LYPD1;ENDOD1;AGAP3;TAPBPL;FAM171A1;ABR;FLRT2;S100A13;VPS16;S100A10;JAG2;FZD1;CREBBP;NDFIP1;JUP;TIPARP;GTF2IRD2;SETD…
Expression In Retina Of 9 Wk R7E Spinocerebellar Ataxia 7 Mice GSE3634	124/566	8.57e-08	3.83e-07	0	0	1.77917	28.9519	PRDM5;BZW2;DCAF4;RGS4;PCMT1;LAPTM4B;COMTD1;GRB10;CLBA1;HMGN1;FBXO9;PDK1;TLE4;ARL10;LMO1;PIAS3;PRKCB;LIMCH1;SLC6A15;HPCAL1;AIP;KCTD1;FOXP1;BCR;TIAM2;RBP4;FRMD6;MAK;TRIB3;KCTD12;KANK3;NECAB2;COPB2;DDX6;DDX5;SMYD5;GLO1;SDC3;GPR85;PCDH15;NDRG2;TRP53RKA;DHX32;PCBP4;EPB41L2;PGK1;ISOC1;ABCA1;BBS2;GGT7;INHBB;SMARCA1;DNAJC15;DCLK1;CDK8;CNOT6;PPP1R1B;UNC119;MAGED2;NOL12;OGT;ZCCHC3;DRC3;GALK2;PIGS;HIP1;CRYB…
Down-regulated Genes In Control NPCs Vs HD NPCs GSE93767	384/2177	8.62e-08	3.85e-07	0	0	1.38495	22.5278	CPNE9;SPON1;WDSUB1;RPL31;WIPF3;HDAC11;OGFOD3;PPP2R2A;ADARB1;ACCS;ELK1;PTPDC1;NDST1;SYNPR;FRAT1;CNST;NDST3;NIPAL3;STMN1;HOMER3;SOX9;LGALS8;PRKCI;MBNL2;EPHA6;UNC13A;LIMCH1;PRKCB;COL23A1;ISLR2;CSNK1D;ACSL4;FRS3;MFSD12;TIAM2;GAREM1;SNORC;DAAM2;HECW2;ADGRB1;RBP1;FAR2;TLN2;MXRA7;SLBP;SPTBN4;GCDH;ANAPC16;EPB41;ABCB4;MGST3;PCDH15;ENDOD1;TGFA;NKAIN3;HLCS;FLRT3;PCBP4;EPB41L2;NEU1;PENK;VPS8;INPP5J;DYM;OTOF;…
Genes Up-Regulated In Genes Changed In HDACi 4B Vs Vehicle Treated Friedreich Ataxia Carrier Blood Cells GSE30933	161/782	8.79e-08	3.92e-07	0	0	1.64972	26.8031	CYFIP2;SPON1;PATJ;SPARC;SERPINE2;TMEM200A;IRS1;ZBTB20;ADARB1;LAPTM4B;RPS6KA3;TMEM145;SAMD14;RIMS3;PPP4R4;SCMH1;NIPAL3;HABP4;CAR11;TMEM14A;PPFIA3;LZTS3;PPP1R16B;HES6;KCNH3;PIAS3;FBXO2;KRT2;GCAT;MTURN;TPST1;SELENOM;FRMD6;DOK4;HECW2;TRIB3;MXRA7;RELL2;VCL;KANK3;6430571L13RIK;RTN2;BEX3;ZFP346;ISYNA1;TMEM59L;NEDD4L;NDRG2;FBXO44;FOXO1;RAP1GAP;TMEM121;GOLGA7B;FAM171A1;PCSK1N;GRK5;HLCS;CAMTA1;WNT1;RAI2;PD…
Genes Up-Regulated In Friedreich Ataxia iPSCs Expression Vs IPS-J1-12-BJ1-iPS12 Cell Line GSE22651	289/1570	9.37e-08	4.16e-07	0	0	1.44962	23.4599	SPARC;HS6ST2;ZFYVE27;WDR91;LIPG;DAG1;CCDC97;SOX9;KIFAP3;IER5;EPHA4;MBNL2;LIMCH1;CACNA2D2;ACSL5;CSNK1D;TIAM1;RBP4;DAAM1;TLN2;PLBD2;ACOT4;MTMR3;IGSF3;MAGED1;MGST3;FIGNL2;AGAP3;TRP53RKA;FAM171A1;DHX32;FLRT2;ADAMTS19;FLRT3;NEU1;SYNDIG1;CHST15;OTOF;KCNN2;PCK2;S100A10;BBS2;ABCA1;JUP;CADM1;LRRN3;PCDH20;SLC35E3;THAP12;DELE1;DDIT4L;HSPA12A;GPR137C;BC005537;CPEB1;NCEH1;ARL2BP;PTK7;KLHDC8A;CYP2S1;PPP1R1B;SF…
ChIP-seq For H3K27ac In R6/1 Vs WT Down GSE140117	215/1109	9.5e-08	4.22e-07	0	0	1.53695	24.851	CPNE9;CCNK;WDSUB1;PPP2R2A;MTFR1L;GBA2;GPATCH8;NDST1;RPS6KA3;SYNPR;CNST;RASSF3;AKT3;FBXO9;ACTN2;PRKCB;ACTN1;ENTPD5;DDX11;SCAMP1;GPR162;DAAM1;ORAI3;ADGRB1;NECAB2;CTBP2;IQGAP2;HIF1A;PGS1;RACGAP1;1110051M20RIK;VPS8;AI413582;MAP7;GSG1L;ZBTB7A;ZBED5;RREB1;SLC19A2;PLK5;ARPP21;TMEM74B;PBX2;DDIT4L;NR1D1;L1CAM;NR2F6;SLC6A6;CPEB1;ARL2BP;PTK7;CPEB2;GPR26;HIP1;GPAA1;GRIK5;CITED4;ARHGAP1;CLTB;PCSK9;ZCCHC17;LYS…
Genes Down-Regulated In Expression In Striatal Cells Of HdhQ111 HD Mice GSE3583	497/2921	1.01e-07	4.45e-07	0	0	1.33488	21.5084	PID1;RAPH1;WDR83;STMN4;DCAF5;ALKBH6;ELK1;SLC4A4;NDST1;COMTD1;CNST;ZFYVE27;DPYSL3;ZFP286;UNC13B;STARD4;MBNL2;DDX11;HPCAL1;PHKA1;B630019K06RIK;SOX11;EML5;ADCY9;DAAM1;HECW2;ATF6;ATF4;CTBP2;PNP2;PDGFB;NEDD4L;WDR61;IQGAP2;FAM149A;FAM171A1;PCDHA1;FLRT2;EPB41L2;ZFP180;D5ERTD579E;CFAP69;PIP5K1A;RREB1;SLC19A1;VTI1B;ZBTB7C;SLC19A2;CDK17;FZD1;CREBBP;CADM1;TIPARP;MTERF2;NR2F1;WDR54;SQLE;SLC6A6;CYLD;UCK2;CPEB…
Up-regulated Genes In R6/2 LNA-SCB Vs WT LNA-SCB Mice GSE85126	31/84	1.07e-07	4.74e-07	0	0	3.66655	58.8451	SEMA3A;GREB1L;MRI1;SOBP;SLC1A6;PPL;BEGAIN;GPI1;EPB41L4B;CAMK2N2;SLIT1;WDR6;VILL;GPRASP2;LRRN3;OSBPL5;PCDH20;GREB1;POU6F2;ISLR2;ZFP618;FAM71E1;LRFN2;NCOR1;OLFM3;TNNT2;SPIN2C;ZFP7;TBKBP1;ARHGEF7;LY6H
Glutamatergic Synapse Gene Module From Mouse Brain PMID20616000	62/230	1.1e-07	4.87e-07	0	0	2.32422	37.2335	CYFIP2;PIGS;ACHE;PTPRS;GRIK5;ICAM5;PTPRF;NRGN;AKT2;RPS6KA2;FLOT2;SCN1B;GIT1;IL13RA1;KLF13;ACTL6B;IGFBP4;KCNAB2;GPR162;CACNB3;ADCY9;PITPNM1;SLC7A8;ATF6;CSNK1G2;CAMK2B;GTF3C1;IGSF8;HDAC5;SMARCD1;PDXK;KMT2A;RASAL1;TRAK1;CXXC5;HDAC6;PTPA;PCSK1N;SEC14L1;GRK2;FCHO1;PCBP4;INPP5J;CLPTM1;CKB;NCDN;JAG2;EGLN1;NPDC1;NDFIP2;DMTN;DAB2IP;L1CAM;GNAO1;FMNL1;PFKL;SLC25A39;KCNS1;PI4KA;ADGRL1;APBA2;YPEL3
Genes Up-Regulated In Influence Of Hdac4 Reduction On Expression In 9 Wk WT Mice GSE38218	48/161	1.13e-07	4.98e-07	0	0	2.67004	42.7088	CREBZF;GPSM1;GPSM2;SPON1;HIP1;IGSF3;IRS1;PELI2;NTN4;SHB;PPP1CC;FAM102B;SEC14L1;FAM184A;ABI3BP;CHN2;PKNOX1;SNX7;FILIP1L;PDLIM7;CACNG5;SVIL;ARG2;PPTC7;KCNIP1;PLEKHA2;SMIM10L1;STARD8;DENND2A;MBD2;SHISA3;AMPD2;CYS1;TRDN;EML5;EEPD1;PCP4;SNORC;CSDC2;RRAGD;CRY1;FAR1;TLL1;PAM;6430571L13RIK;KANK3;TUBA8;SPSB4
Expression In NSCs Lines HD109i.1 And HD60i.4 From HD Patients GSE37517	700/4288	1.15e-07	5.07e-07	0	0	1.28503	20.5287	PATJ;SERPINE2;PNMAL1;TMEM200A;WIPF3;SCX;EMC10;ADARB1;SLC4A4;NDST1;SAMD15;DPYSL4;SCN11A;RAVER2;AKT3;DPYSL3;NDST3;WDR91;HES6;STARD4;RBFOX2;UNC13A;9330159F19RIK;PHKA1;WDR73;SCAMP1;RBP4;DAAM2;RFX4;MAP1A;ACOT2;ACOT1;FAR2;RABL2;ACOT5;ACOT3;NAA60;LRPAP1;PNP2;FLII;LYPD1;FIGNL2;NEDD4L;WDR61;TAPBPL;IQGAP2;NYAP2;PRDM10;C9ORF72;C7;HLCS;PRKAR2B;EPB41L2;1110051M20RIK;RRS1;CHST15;ST3GAL2;EXPH5;SLC19A2;ABCA1;ARP…
Genes Up-Regulated In Neuro2a Htt72Q-ni Vs Htt25Q-ni PMID28743452	169/833	1.17e-07	5.15e-07	0	0	1.62033	25.8598	CYFIP2;COL16A1;SPARC;TUSC3;STMN4;FAIM2;ALKBH6;RGS4;FAM162A;DPYSL3;NIPAL3;ARHGDIB;PIM1;TOM1;DAG1;COTL1;KIF21B;LGALS8;SLC16A3;ENPP5;PHLDA1;WASHC1;PDK1;EPM2A;STARD4;DGAT2;WSB2;IGFBP4;HPCAL1;SARS;UBALD1;RBP4;CARHSP1;TBC1D20;DAAM1;PKP2;ACOT2;TRIB3;ATF6;SQSTM1;UBA52;ATF3;PLBD2;ATF4;KMT2E;BEX3;FBLIM1;PEF1;MAGED1;NXPH4;HVCN1;SDC3;MRI1;AK4;NDRG2;PRDM10;KIF3A;DDRGK1;NEU1;PSAP;PGK1;SARAF;IGFBP6;RAB11FIP5;VA…
Differentially Expressed Genes In Cortex Of 10 Mon HD Q140 Mice Vs Q20 GSE78272	143/680	1.26e-07	5.54e-07	0	0	1.69139	26.8664	CCNT2;RAB3A;TUSC3;WWC1;WIPF3;ADARB1;SLC4A4;NUDT4;DOCK10;PPP4R4;PIM1;CAR11;ANKS1B;LZTS3;PPP1R16B;MLIP;ATP6V1G2;STARD8;TPM2;SLC6A15;KCTD1;PHKA1;SLC6A11;SHISA3;SHISA7;TRAIP;ADAM19;EML5;ACAP2;OLFM2;GAREM1;DAAM1;COL4A2;DAAM2;RFX4;FAR1;PPIG;RIN1;SRSF7;ISCU;JCAD;PDE9A;VCL;D930048N14RIK;EPHA10;CABP7;TMEM59L;NEDD4L;TGFA;GPR83;KLC1;NDRG2;SLC9A3R2;FAM171A1;CFAP69;SMYD2;INPP5J;MAP7;KCNN2;S100A10;PRPF38B;PLK5…
Down-regulated Genes In Skin Of HD Q175 Mice PMID26900923	268/1443	1.3e-07	5.69e-07	0	0	1.46292	23.1942	LPGAT1;CMAS;SERPINE2;SCX;AQP5;ACCS;HS6ST2;NUDT4;SAMD14;DPYSL4;RASSF3;MSANTD1;PPP4R4;RAVER2;KIF21B;SOX9;MCCC2;IAH1;SLC6A15;ZFP618;EBF4;UPB1;TIAM2;RBP4;NEIL2;DAAM2;HECW2;ORAI3;RBP1;SPATA13;SIK3;ACOT1;TLN2;ANKK1;ASTN2;ACOT4;ATF4;MAGED1;ZFP503;STC1;TMTC1;C9ORF72;ADAMTS10;CRHR1;PRKAR2B;PCBP4;STC2;NEU1;PENK;PIP5K1B;TSPAN3;ZBED5;RAB11FIP5;ABCA1;CDK17;FZD1;PDE2A;SMARCA1;CPEB1;ARL2BP;GKAP1;NAPEPLD;PEMT;UN…
Genes Changed In HDACi 106 Treated Vs Untreated Friedreich Ataxia Patient Blood Cells GSE30933	476/2788	1.31e-07	5.74e-07	0	0	1.33819	21.2039	CYFIP2;PATJ;SERPINE2;TMEM200A;ADARB1;FNBP1L;GLE1;PCMT1;SAMD14;DPYSL4;PPP4R4;STMN1;HOMER3;RBFOX2;PRKCB;STARD8;COL23A1;MRTFA;EML4;GPR162;ARMC6;HECW2;ORAI3;RBP1;ACOT2;ACOT1;ASPHD2;RABL2;ACOT5;PLBD2;SKAP2;ACOT3;LRPAP1;SAR1A;ANAPC16;FLII;PDGFB;NEDD4L;WDR61;AGAP3;TAPBPL;C9ORF72;FAM171A1;ABR;HSPH1;RDH11;ST3GAL2;EXPH5;JAG2;ABCA1;NDFIP2;H3F3B;TIPARP;GTF2IRD2;THAP12;CDC7;NETO2;L1CAM;ELL2;WDR54;SLC6A6;CYLD;…
Down-regulated Genes In PK4C9 Treated SMA Fibroblasts GSE94111	766/4742	1.32e-07	5.74e-07	0	0	1.27345	20.175	POP5;PATJ;PNMAL1;TMEM200A;XYLT2;DCAF8;ACCS;FNBP1L;ALKBH6;SLC4A4;ZFYVE28;NDST1;COMTD1;SAMD15;AI593442;PSMD5;AKT3;WDR91;STMN1;PWWP2A;PKNOX1;SAMD10;ZFP286;STARD4;RBFOX2;IAH1;NHLRC3;PHKA1;DKK2;EML4;EML5;GPR162;DAAM2;ARMC6;HECW2;ORAI3;MAP1A;SPIN2C;ACOT2;ACOT1;FAR1;ASPHD2;FAR2;MAML3;ACOT5;ACOT4;SKAP2;ACOT3;PIF1;SAR1A;MEAF6;TARSL2;CTBP1;ABCB4;LYPD1;PRDM15;FIGNL2;WDR61;MRPL12;PRDM10;ADAMTS10;FAM171A1;ABR…
Mitochondrion-specific Gene Module M5 From Human Brain PMID20616000	61/226	1.32e-07	5.77e-07	0	0	2.32786	36.8657	CYFIP2;ACHE;MTCH1;CNTNAP1;PITPNA;CLSTN1;MAST1;CLTB;FAIM2;OGDHL;SPINT2;CHD3;SLC8A2;GPI1;TUBA1B;SH3BGRL3;ME3;KIF21B;MPV17;ACTL6B;SARS;SYP;KCNAB2;NME1;RNF41;TUBB2A;ADGRB2;MAP1A;SNRNP25;ATP6V0D1;NAPA;CAMK2B;BRSK2;DCTN2;MAGED1;TMEM59L;6430548M08RIK;KLC1;PCSK1N;5730409E04RIK;EPB41L1;ERI3;AP2S1;CKB;NCDN;ATP6V0E2;P4HTM;CACNG3;SYT5;KLHDC3;DMTN;PTGES2;PNMA3;TUBB4B;PPP1CA;CALY;SNX17;TCEA2;PI4KA;CALM3;CAMK1
Genes Up-Regulated In Genes Changed In HDACi 4B Treated Vs Untreated Friedreich Ataxia Patient Blood Cells GSE30933	184/925	1.36e-07	5.91e-07	0	0	1.5826	25.0218	CYFIP2;SPON1;PATJ;FAAH;SPARC;SERPINE2;GPR68;TMEM200A;XYLT2;SPINT2;ICAM5;ADARB1;ACCS;TMEM141;LAPTM4B;TMEM145;SAMD14;CCND2;RIMS3;SCMH1;NIPAL3;HABP4;CAR11;IER5;TMEM14A;PPFIA3;LZTS3;PPP1R16B;KCNH3;PIAS3;DGAT1;FBXO2;TBC1D2B;FRS3;MTURN;TPST1;ARMCX4;SELENOM;FRMD6;ASPHD2;TRIB3;DENND6B;MXRA7;RELL2;VCL;CSNK1G2;KANK3;6430571L13RIK;RTN2;BEX3;ISYNA1;PNP2;MAGED1;ARL3;TMEM59L;6430548M08RIK;RASAL1;FBXO44;GOLGA7B…
Genes Up-Regulated In Foxp2/Olfm3-expressing Neurons Of R6/2 Vs WT PMID32681824	66/252	1.42e-07	6.15e-07	0	0	2.23568	35.2546	GSK3B;PID1;MCTP1;MEI4;PCDH11X;ZBTB20;DCAF5;SOBP;GPATCH8;IGF1R;GRM8;REV3L;EPHA6;COG5;SGIP1;MAGI3;RALGAPA2;ENAH;PHF20L1;DNAJC1;CDH12;CFAP54;SOS2;CDH18;DDX5;CAMK2D;SEMA3A;ANKRD12;PRICKLE2;PPM1H;LIN7A;ZFP804A;KLC1;PHF21A;ZFP804B;STK3;NKAIN2;FGD4;PCSK1N;NKAIN3;BTAF1;CUX2;SNTG1;CCDC85A;1110051M20RIK;TRA2A;BRINP3;KLHDC10;CREBBP;CADM1;KCNB2;RANBP17;FBXL17;LHFPL3;TMEM196;GULP1;PTPRD;MGAT4C;LRFN2;LRFN5;RAL…
Neuron Gene Module From Cerebral Cortex PMID18849986	184/926	1.47e-07	6.37e-07	0	0	1.58037	24.8632	POP5;CMAS;ATP8A1;PLXND1;PNMAL1;TUSC3;ZFAND5;PITPNA;GDE1;CXCL14;ETS2;CDH8;NUDT4;TXN2;RGS4;NDST1;LAPTM4B;AKR7A5;PCMT1;RPS6KA3;FAM162A;RPS6KA2;DPYSL3;NARS2;GRB10;LGALS8;BTRC;TMEM14A;PPP1R16B;MAP2K3;RAB2A;PRKCI;RBFOX2;ATP6V1G2;MBNL2;LIMCH1;COG5;SLC6A15;TPM1;AIP;CASK;YOD1;SCAMP1;ATP1B1;CACNB2;TMX4;CARHSP1;HNRNPUL2;ORAI3;ARMCX6;FAR2;UBA52;DGKI;KMT2A;FLII;SLC1A1;ANKRD12;ITPR1;WDR61;KLC1;KCNV1;STIP1;HSPH…
Genes Down-Regulated In Expression In PC12 Cells With AR10Q Upon Ligand Stimulation GSE50383	20/42	1.51e-07	6.53e-07	0	0	5.6862	89.3059	KLF10;LMO1;CADM1;CELF3;SLC7A14;ATP2B4;ANO6;CXCL14;DCLK1;FAM171A1;CLCN5;MEIS1;PDE10A;HEY1;SESN3;ADORA2A;CLMN;KCNN3;MEST;BOK
Striatum RNA M9 Module (Magenta) PMID26900923	97/419	1.52e-07	6.58e-07	0	0	1.90468	29.8964	TXN1;SLC46A1;RAB3A;CMAS;TUSC1;WDR83;CNDP2;GCSH;GLE1;AKR7A5;APMAP;ARL6IP4;FAM3C;BORCS8;ATP6V1G2;AKR1E1;AIP;EPDR1;ARMC6;ACOT1;KDELR2;SNRNP25;GEMIN7;LY6H;SQSTM1;VPS28;ISCU;SNRPB;BEX3;GCDH;BEX2;DIPK1B;KLC1;FBXO44;TIMM50;DPH3;AI413582;SARAF;CCDC32;EEFSEC;SYT5;KLHDC3;EIF2B2;1500011B03RIK;KLHL26;SNHG4;COQ4;NSFL1C;IFT22;RSPH3A;GPAA1;TSEN15;PHF1;SNX11;ZCCHC17;ATP5G1;ALAD;MAP1LC3A;SPR;TMED3;MDP1;3110082I17…
Genes Changed In Microglia Vs Monocytes PMID28671693	247/1314	1.53e-07	6.59e-07	0	0	1.48231	23.2629	CYFIP2;CPNE8;SLC46A1;PID1;SPARC;GLDN;LIPG;DZIP1L;SCN1B;AGFG2;ARL10;RBFOX2;STARD8;ACTN1;ZFP3;CARHSP1;GAREM1;NEIL2;HECW2;RRAGD;TLN2;RIN1;ASTN2;ATF3;KCTD15;SAR1A;INTU;PNP2;ABCB4;PDGFB;IQGAP2;HIF1A;ADAMTS10;PRKAR2B;EPB41L2;LDHD;RAB11FIP4;ABCA1;JAG2;MYH7B;DNAH17;TIPARP;PDE2A;NR1D1;SMARCA1;GPR137C;GLUD1;CCDC88C;SFXN2;PAM;RYR1;CDKN1A;PTPRS;HIP1;TENM4;PTPRO;MCUB;BHLHE41;SHB;SMPD3;AKAP12;SLC22A15;ZFP385C;…
Genes Down-Regulated In PC12 Htt-Q74 Vs PC12 Htt-Q23 Upon 120 H Of Induction PMID28499347	72/284	1.59e-07	6.82e-07	0	0	2.1413	33.5272	SNAP25;PLXND1;WWC1;TONSL;UBE2L6;HR;FAM162A;AKT3;FFAR3;SLC16A3;PRMT8;CHRNB4;ACTN2;ITGA3;TESC;NPY1R;SYP;WDR35;EML5;RBP4;TNNT2;ORAI3;ARHGEF4;ASPHD2;TLN2;SMPDL3B;KCTD16;DGKH;ANKRD17;PKDCC;ARHGEF28;NEDD4L;GOLGA7B;BRINP2;KLC3;GRK2;MTHFD1L;GRK5;POLD1;VPS8;ANO10;FLNA;LRRC8D;SLIT3;ZKSCAN17;ZSWIM5;ARNT2;LINGO1;WNT10A;TMEM132E;CADM1;OSBPL5;FEM1B;AGL;TMEM132A;TRPV2;L1CAM;TDRD5;PLXDC1;SGPP2;DCLK1;DLK1;FIG4;SQ…
Cingulate (Layer 5 And 6), Somatosensory (Layer 5), And Basolateral Amygdala Pyramidal Neuron Gene Module 1 PMID19638972	60/222	1.59e-07	6.83e-07	0	0	2.33165	36.4993	CYFIP2;RIPOR2;SCARB1;AHCTF1;GRIK5;ARHGAP1;EMC10;STMN4;CDC73;HK1;RGS4;SPR;SESN1;PRADC1;NEFM;CAR11;2610301B20RIK;GIT1;WSB2;RAD23B;RC3H2;DUSP7;SLC7A4;PTP4A2;KCNMA1;NHP2;ATF6;2310011J03RIK;SF1;ANKRD17;SLC24A3;CREM;OPRL1;ASB11;GDPD5;CXXC5;AGPAT3;RHOBTB2;NEURL1A;CKMT1;RXRA;MAN2A1;AP2S1;STX6;IGFBP6;RABGAP1L;DMTN;TMEM132A;PLCL2;SYNJ2;TUBB4B;WDR12;PLXDC1;WDR54;PPP1CA;IFT22;SYT12;GPR180;OSBPL1A;MAD2L1
Genes Changed In HDACi 4B Vs Vehicle Treated Healthy Donor Blood Cells GSE30933	208/1074	1.68e-07	7.21e-07	0	0	1.53342	23.9183	CYFIP2;SPON1;PATJ;SPARC;SERPINE2;ADARB1;FNBP1L;PPP4R4;HABP4;HES6;PRKCB;FBXO2;AP1B1;ACSL5;ALG1;GCAT;MTURN;AFG3L2;ARMC6;HECW2;RABL2;MXRA7;BEX3;IGSF3;TAPBPL;HSPH1;TSPAN5;SNX8;PCK2;RAB11FIP5;JAG2;NDFIP2;JUP;H3F3B;TIPARP;GTF2IRD2;CDC7;WDR54;SLC6A6;CALY;ADI1;FXYD2;SFXN4;PEMT;DCHS1;MAGED2;ITM2C;HIP1;ACY1;CETN2;GBE1;CITED4;LRRC1;ZCWPW1;TUBA1B;ZMYM2;ADAMTSL5;TMEM44;ENC1;GPR137;JARID2;GPRASP2;ZFP365;GIT1;C…
Genes Up-Regulated In Friedreich Ataxia iPSCs Expression Vs HMSC-ad Cell Line GSE22651	677/4142	1.71e-07	7.3e-07	0	0	1.28426	20.0137	PID1;SERPINE2;TMEM200A;RAPH1;ADARB1;ACCS;ELK1;PTPDC1;SAMD14;PSMD5;ZXDB;AKT3;WDR91;LIPG;STMN1;HOMER3;MPV17;IER5;MBNL2;RBFOX2;IAH1;HPCAL1;MRTFA;PHKA1;FRS3;GPR162;ADCY9;DAAM1;DAAM2;ORAI3;MAP1A;RBP1;SPIN2C;ACOT2;ACOT1;RABL2;ATF6;ACOT5;PLBD2;VPS28;RNF122;SKAP2;ACOT3;LRPAP1;ENDOD1;AGAP3;TAPBPL;HIF1A;ADAMTS10;FAM171A1;FLRT2;C7;HLCS;1110051M20RIK;S100A13;VPS16;S100A10;B3GALNT2;FZD1;NDFIP2;NDFIP1;TIPARP;G…
Genes Up-Regulated In The Astrocytes Of R6/2 Mice Vs WT At 3 Month Old GSE124846	310/1715	1.85e-07	7.89e-07	0	0	1.4187	21.9969	PNMT;TRIR;PATJ;FAAH;SLC46A1;PID1;CMAS;SPINT2;ZFP606;DCAF5;ALKBH6;GBA2;GLE1;SOX3;DPYSL4;PSMD5;PDK1;ARL10;UNC13B;MCCC2;HES6;PAQR7;9330159F19RIK;CIRBP;AP1B1;CSNK1D;B630019K06RIK;SOX11;ZFP618;VWA5B2;AFG3L2;GPR165;ACOT2;SPIN2C;KDELR2;ZFP7;SKAP2;SLBP;LRPAP1;BEX2;MTMR3;INTU;MAGED1;PCDH10;ABCB4;FLII;MGST3;ZFP503;WDR61;SLC30A10;PPL;DEDD2;STRIP1;CHTF8;PRRC1;ADAMTS19;DPH3;N4BP2;SLC19A1;VAT1;ABCA1;PPP1R26;FZ…
Striatum RNA M34 Module (Darkmagenta) PMID26900923	51/178	1.86e-07	7.95e-07	0	0	2.5249	39.1248	GALNT13;PCDHGB6;THRB;UBXN2B;PSIP1;CDH8;9030624G23RIK;PPP1CB;OSBP;PCDHGA8;USP48;MUSK;ATMIN;DCC;ZFP934;ZBTB34;KIF27;GREM2;TFDP2;HNRNPUL2;NCL;RBMS1;KCTD16;KDM3B;TARSL2;TMEM63C;ARHGAP19;PRKX;PHF21A;PRTG;SRR;FAM124A;FAM184A;KDSR;BEND7;CNNM2;BC055324;SCN3A;SKIL;MAP2K6;B3GALNT2;ZFP831;CD163;SGTB;RPE65;DIAPH2;STAG1;CENPJ;CREBRF;RIMBP3;EZH2
Expression In PC12 Cells With AR10Q Upon Ligand Stimulation GSE50383	42/135	1.89e-07	8.03e-07	0	0	2.83578	43.9082	ADCYAP1R1;CEBPB;TLNRD1;UXS1;ZFAND5;CELF3;SLC7A14;ZDHHC23;ADARB1;MLLT3;CXCL14;RASD2;FAM171A1;DNAJB1;FUT8;SESN3;HEY1;CLMN;NEU1;PLXNA1;KCNN3;RAB11FIP3;MEST;BOK;LMO1;KLF10;DGAT2;CADM1;EDEM1;SEMA4C;ATP2B4;ANO6;BAIAP2;DCLK1;ADAM19;CLCN5;MEIS1;PDE10A;ADORA2A;KLHL7;SGK3;KCTD16
Genes Up-Regulated In Friedreich Ataxia iPSCs Expression Vs BG02 Cell Line GSE22651	374/2129	2.04e-07	8.69e-07	0	0	1.37572	21.19	SLC46A3;CPNE8;SPON1;FAAH;TLNRD1;SPARC;SERPINE2;WIPF3;RAPH1;GDE1;ADARB1;ACCS;SOX3;WDR91;LIPG;HABP4;PTGFRN;IER5;HES6;EPHA4;ATP6V1G2;COG5;CMC2;SLC6A15;AP1B1;HPCAL1;ISLR2;PHKA1;CSNK1D;SOX11;ACSL4;ZFP618;CMBL;MFSD12;PLPP6;CRISPLD1;DAAM1;RBP1;RRAGD;FAR1;ZFP7;TLN2;PLBD2;VPS28;MAGED1;PCDH10;PNP2;MGST3;PDGFB;ENDOD1;AGAP3;PRDM10;FAM171A1;DGUOK;RHOT2;FAM124A;COMMD9;RACGAP1;ADAMTS19;HLCS;FLRT3;EPB41L2;NEU1;S…
Genes Down-Regulated In PC12 Htt-Q74 Vs PC12 Htt-Q23 Upon 48 H Of Induction PMID28499347	96/416	2.06e-07	8.76e-07	0	0	1.89634	29.191	KCNG2;SNAP25;PLXND1;ACY1;CELF3;SCX;DOC2B;SIPA1L2;CXCL14;RGS4;SPR;FAM162A;RSPO1;SEC61B;BOK;KLF10;SREBF1;TLE2;PARP3;CHRNB4;DGAT1;DUSP1;ITGA3;MMD;TESC;ACTN1;NPY1R;PPP2R5A;AMPD3;SYP;LRRC42;VAV2;ENAH;EML5;RBP4;BDH1;ADORA2A;DOK4;KCNMA1;ASPHD2;TLN2;SLC29A1;DGKH;CEBPB;ISYNA1;PKDCC;MTFP1;SLC35D3;ARHGEF28;TMEM121;GOLGA7B;RASD2;FAM171A1;TRP53I11;ASIC4;BRINP2;GRK5;CLMN;STC2;POLD1;E2F1;ANO10;SLIT3;KCNN3;SCN3B…
Genes Up-Regulated In dSPNs Of HdhQ170 Vs HdhQ20 PMID32681824	78/318	2.15e-07	9.1e-07	0	0	2.05029	31.4794	TXN1;RBM28;ABCD2;TSEN15;TONSL;FAIM2;SAT2;CXCL14;GCSH;RBM3;LAPTM4B;SAMD14;TUBA1B;TMSB4X;DPYSL3;TIMP2;FAM3C;GGACT;LGALS8;GPRASP2;CAST;HES6;PHYH;HSDL2;ENTPD5;IFNGR2;ANKRD45;CIRBP;AKR1A1;B630019K06RIK;SOX11;SYP;FAHD2A;ENAH;TNNT2;MORF4L2;GEMIN7;TCTA;SPACA6;ISCU;CDH18;SKAP2;BEX3;BEX2;CAMK2D;MAGED1;GLRX;MRO;NDRG2;COX5A;SELENOH;PTPA;BC005624;PCSK1N;TCEAL3;GNG4;CAMK2N2;BEND3;RPL13;BNIP2;BID;BRINP3;TCEAL9;…
Genes Up-Regulated In Genes Changed In Fragile X Syndrome iPSCs Vs Fibroblasts GSE21348	289/1584	2.15e-07	9.1e-07	0	0	1.43269	21.9938	CYFIP2;PATJ;CMAS;SPINT2;FNBP1L;HS6ST2;ZDBF2;GCSH;PPP4R4;DPYSL3;RAVER2;LIPG;PTGFRN;ZFP286;UNC13B;MCCC2;RNF138RT1;UNC13A;PRKCB;DDX11;CACNA2D2;PHKA1;GTPBP3;TIAM1;CRISPLD1;DAAM1;RRAGD;FAR2;GRB7;PIF1;GCDH;ADCYAP1R1;BEX2;CTBP2;IGSF3;EPB41;PCDH10;FIGNL2;IQGAP2;C9ORF72;CRHR1;MBTD1;FAM124A;INPP5F;ADAMTS19;FLRT3;CHST15;KCNN1;SFN;DPH6;N4BP3;N4BP2;RAB11FIP4;PPP1R26;H3F3B;NEBL;LRBA;GREB1;CDC7;L1CAM;DCLK1;SRPK…
Up-regulated Genes In Control Neurons Vs DCLK3<K543M> Overexpressing Neurons GSE104091	690/4237	2.19e-07	9.25e-07	0	0	1.27898	19.6118	TLNRD1;PNMAL1;WIPF3;DCAF5;ELK1;SLC4A4;DCAF4;GPATCH8;RXFP3;ZDBF2;PCMT1;SAMD14;ZFYVE27;DPYSL4;4921524J17RIK;AKT3;LIPG;MED1;PRKCI;WSB2;COL23A1;HPCAL1;SYTL5;FRS3;EML4;RBP4;DAAM1;DAAM2;RFX4;MAP1A;RBP1;ORAI2;FAR1;RABL2;MAML3;NGEF;ATF4;LRPAP1;ZBTB8A;TARSL2;PNP2;LYPD1;ENDOD1;IQGAP2;PRDM10;HIF1A;ABR;RHOT2;EPB41L2;1110051M20RIK;S100A13;RREB1;SLC19A1;VTI1B;PLK3;NDFIP1;GPR12;CADM1;H3F3B;MTERF2;EDEM1;NR2F1;ER…
Genes Up-Regulated In Expression In NSCs Lines HD180i.5 And HD60i.4 From HD Patients GSE37517	276/1503	2.33e-07	9.83e-07	0	0	1.44267	22.031	POP5;SERPINE2;TMEM200A;RAPH1;SYNPR;DPYSL3;NDST3;CPNE2;EPHB2;LGALS8;EPHA4;STARD4;EPHA6;PAQR7;ARL15;STARD8;ACTN1;ZFP3;ALG1;TIAM2;TIAM1;CRISPLD1;DAAM2;ORAI3;RBP1;SPATA13;ORAI2;SIK3;FAR2;KCTD12;KCTD15;SKAP2;PCDH10;MGST3;SDC3;ENDOD1;FIGNL2;TGFA;IQGAP2;FAM149A;FLRT2;PRKAR2B;TSPAN5;PIP5K1B;SNX9;TNRC18;SNX7;FZD1;PCDH20;GREB1;NR2F1;POU6F2;RAB27A;DDIT4L;L1CAM;SMARCA1;ELL2;SLC6A6;ITGBL1;DCHS1;CALM3;CPEB2;PA…
Genes Up-Regulated In Ciliated Ependymal Cells Of zQ175DN Vs WT PMID32681824	64/245	2.41e-07	1.01e-06	0	0	2.22683	33.9329	SETD4;DGKD;GALNT13;THRB;UBXN2B;DGKB;ZFAND5;SOBP;SLC4A4;HS6ST3;SYNPR;DACH1;AKT3;EPHA6;PPP1R12A;KCND2;DCC;TRPC1;TPM1;SHISA9;ITPKB;EML5;CACNB2;TMX4;OLFM3;DAAM1;TBC1D5;RFX4;CTDSP2;SPATA13;CDH12;MAML3;TNIK;KCTD16;SLC24A2;ARL3;NEDD4L;ARHGAP18;HNRNPLL;HDAC9;NKAIN2;BC005624;PURA;SNTG1;1110051M20RIK;KRIT1;RREB1;BRINP3;PLXNA4;WDR17;INSR;KCNIP4;FBXL17;HIPK1;MPP7;GULP1;PTPRD;MYO1D;DLG2;NBEA;CNTN4;SSBP2;GALK2…
Friedreich Ataxia iPSCs Expression Vs BG03 Cell Line GSE22651	775/4821	2.45e-07	1.03e-06	0	0	1.26511	19.2574	PPP4R4;LIPG;PWWP2A;PKNOX1;MEF2A;MRTFA;BCR;EML4;RBP1;RABL2;PLBD2;ATF4;SLBP;SAR1A;FIGNL2;AGAP3;MRPL12;DEDD2;RHOT2;HLCS;RDH11;EPB41L2;SYNDIG1;SFN;VTI1B;JAG2;ABCA1;JUP;TIPARP;NEBL;NCAPH2;LRBA;PBX2;EIF2AK4;DAZL;PKIB;UCK2;FAT1;SFXN4;DCHS1;GSTM6;EZH2;HRK;LIN54;ARHGAP1;SHB;MED16;JPH4;TMEM47;TUBA1B;TMEM44;NELFB;2610301B20RIK;DLGAP2;NEFH;PCMTD1;KCND2;BAZ1A;FAHD2A;PHF20L1;MED22;SLC7A6;SLC7A8;PXDN;PELI1;ADSS…
Genes Up-Regulated In Myotonic Dystrophy 2 Markers In Human Quadriceps Muscles GSE47968	195/1000	2.52e-07	1.06e-06	0	0	1.54444	23.4645	CPNE8;PNMAL1;TMEM200A;RAPH1;ZFP606;MSANTD1;AKT3;STMN1;MEF2A;DYNC2H1;EPHA4;MED1;MBNL2;MUSK;9330159F19RIK;LIMCH1;METTL2;CIRBP;PHKA1;MTURN;EML4;CRISPLD1;DAAM1;HECW2;AKAP9;VDAC2;RNF122;BEX3;HIF1A;HSPH1;SEC14L1;1110051M20RIK;D5ERTD579E;PIP5K1B;TNRC18;TSPAN3;SNX7;RREB1;PPP1R26;FZD1;EGR1;ARPP21;GTF2IRD2;DCLK1;PPP1R1B;FAT1;GALNTL6;ANP32B;NOL12;CDK13;EZH2;CATSPERG1;CDKN1A;PYGL;SIPA1L2;PTPRF;TMEM47;ANKRD9;…
Genes Down-Regulated In Friedreich Ataxia iPSCs Expression Vs Miz4 Stem Cell Line GSE22651	626/3807	2.56e-07	1.07e-06	0	0	1.28884	19.5643	TRIR;PNMAL1;RPL31;UXS1;WIPF3;RAPH1;SPINT2;FNBP1L;DCAF4;GLE1;GCSH;DPYSL4;PSMD5;PPP4R4;4921524J17RIK;ZXDB;STMN1;PWWP2A;PKNOX1;IER5;HES6;MED1;PRKCI;STARD4;IAH1;WSB2;PRKCB;HPCAL1;CACNA2D2;SCAMP1;EML4;SPIN2C;ACOT2;ACOT1;FAR2;RABL2;ACOT5;NGEF;RNF122;SKAP2;ATF4;ACOT3;SLBP;ZBTB8A;SAR1A;ANAPC16;IQGAP2;C9ORF72;HIF1A;DEDD2;ANAPC11;ABR;RIC8B;FLRT2;HLCS;RDH11;EPB41L2;D5ERTD579E;1110051M20RIK;LDHD;RREB1;LHPP;V…
Genes Changed In HDACi 4B Vs Vehicle Treated Friedreich Ataxia Carrier Blood Cells GSE30933	212/1105	2.64e-07	1.1e-06	0	0	1.51551	22.9542	CYFIP2;SPON1;PATJ;SLC46A1;SPARC;SERPINE2;TMEM200A;ADARB1;RPS6KA4;RPS6KA3;SAMD14;PPP4R4;NIPAL3;HABP4;MCCC2;HES6;FBXO2;KRT2;AP1B1;ALG1;GCAT;MTURN;AFG3L2;ARMC6;HECW2;KDELR2;TRIB3;RABL2;MXRA7;BEX3;NEDD4L;FAM171A1;HSPH1;HLCS;SNX8;RAB11FIP5;JAG2;NDFIP2;TMEM74B;TIPARP;GTF2IRD2;L1CAM;WDR54;NR2F6;CALY;ADI1;FXYD2;SFXN4;DCHS1;MAGED2;PAM;ITM2C;SETD2;ACY1;CETN2;GBE1;LYST;LRRC1;TUBA1B;ADAMTSL5;TMEM44;ENC1;JARI…
Genes Down-Regulated In Mural Cells Of R6/2 Vs WT PMID32681824	38/118	2.66e-07	1.11e-06	0	0	2.98053	45.1244	DOCK6;IGSF8;PID1;SPARC;DGKB;MTCL1;LAMC1;PTN;CHD2;ABR;ABLIM1;BRINP1;SESN3;EPB41L2;PENK;PIP5K1B;CKB;ERC2;GUCY1A2;ARPP21;BCL11B;TRPC3;SGIP1;ARHGEF17;TPM1;DENND2A;CRIM1;CTDSPL;KCTD1;ANO4;CACNB2;ARHGAP10;PCP4;CMSS1;PDE10A;DAAM2;CALM1;RAPGEF5
Genes Up-Regulated In Microglia Vs Macrophages PMID28671693	121/560	2.68e-07	1.11e-06	0	0	1.74633	26.4278	HR;FNBP1L;GLDN;CLEC18A;ZDBF2;LIPG;KIF21B;PPFIA4;SCN1B;ARL10;SEMA6C;ATP6V1G2;MAGI3;LMTK3;ZFP618;LMO7;EML5;ARMCX4;SLC9A5;GAREM1;DOK4;TLN2;NPTXR;CTTNBP2;ABCB4;PDGFB;GPR85;LTBP3;ADAMTS10;TMEM25;ARHGAP20;EPB41L2;PIP5K1B;TNRC18;SRGAP1;EXPH5;RAB11FIP5;JAG2;MYH7B;EGR1;TMEM86B;SMAD3;AUTS2;PLK2;CCDC136;PTCH1;HSPA2;SMARCA1;GPR137C;ARHGAP33;DLG2;NBEA;DCHS1;MYCBPAP;SFXN2;AMOTL1;ITM2C;RYR1;DOCK6;CNTNAP1;DOCK4;…
Markers Of Inferior Olivary Complex In Myelencephalon PMID22996553	59/220	2.68e-07	1.12e-06	0	0	2.30632	34.8969	CPNE8;GPR26;PTPRO;ETS2;NUDT4;NRGN;SMPD3;SYNPR;ADGRA1;ENC1;ERC2;SLC16A3;LMO1;PRMT8;TRPC3;VSTM2L;LMO7;TMEM150C;FOXP1;RBP4;CACNB3;DOK7;PKP2;RBM20;CD302;ASTN2;LRRC3B;NPTXR;D630045J12RIK;SLC24A3;IGSF3;HPGD;SEMA3D;PLD5;LIN7A;GDPD5;ACTR3B;CACNA1E;GRK3;STC2;CCDC85A;RRS1;KCNN2;PIP5K1B;MSC;SCN3A;SVIL;ANKRD34C;EYA1;GABRA4;NTRK3;ECEL1;DAB2IP;SEMA4F;TPD52L1;POU4F3;PKIB;KCNS1;PTK7
Glutamatergic Neuron Gene Module 2 PMID19638972	67/262	2.99e-07	1.24e-06	0	0	2.16446	32.5147	SLC46A3;PCSK2;RSPH3A;CELF1;CETN2;DUSP18;RSPH3B;ELK1;CAMKV;4921524J17RIK;GM3558;COTL1;FAM3C;PPFIA4;PDK1;USP47;PRKCB;MMD;NCOA6;ACTN1;MAGI3;LMO7;METTL23;PCP4;NCOR1;DMTF1;GM2897;MAK;MTF2;GM3667;PELI1;CMPK2;KDELR2;NGEF;VCL;CAMK2B;KDM3A;LEPROT;HLF;ANAPC16;ARHGEF25;HPCA;GPR85;GPR83;RASGRP2;ARNTL;ARHGAP21;SLITRK1;MAP7;SPOP;PIP5K1A;PDLIM7;H3F3B;ODF2;PLK2;ERLIN1;NAP1L1;FOXN2;BAIAP2;HS3ST1;DLK2;PER2;CROCC;P…
Expression In Skeletal Muscle Of HSALR 20B Myotonic Dystrophy Mice GSE24920	705/4348	3.03e-07	1.26e-06	0	0	1.2726	19.0996	TRIR;RPL31;WIPF2;WIPF3;RAPH1;DCAF8;EMC10;DCAF5;ALKBH6;SLC4A4;GPATCH8;GLE1;PCMT1;PSMD5;AKT2;4921524J17RIK;AKT3;WDR91;ANKS1B;UNC13B;MED1;PRKCI;MBNL2;RBFOX2;IAH1;9330159F19RIK;PRKCB;HPCAL1;CACNA2D2;PHKA1;SOX11;UPB1;RC3H2;RBP4;ADCY9;ACOT2;UBA52;ATF3;NGEF;SKAP2;ATF4;ZBTB8A;SAR1A;CTBP2;TARSL2;NEDD4L;WDR61;RIC8B;FLRT2;PRKAR2B;S100A13;PIP5K1A;ZBTB7A;RREB1;ST3GAL2;LHPP;EXPH5;S100A10;B3GALNT2;MYH7B;CREBBP;…
Friedreich Ataxia iPSCs Expression Vs IPS-J1-12-BJ1-iPS12 Cell Line GSE22651	448/2623	3.23e-07	1.34e-06	0	0	1.33482	19.9486	CYFIP2;WIPF3;WDR83;GCSH;ZFYVE27;WDR91;LIPG;STMN1;PWWP2A;PKNOX1;IER5;HES6;MBNL2;PRKCB;CACNA2D2;GTPBP3;RBP4;DAAM1;PLBD2;ACOT4;PIF1;MTMR3;SAR1A;ANAPC16;FIGNL2;AGAP3;DEDD2;TRP53RKA;FAM171A1;RIC8B;FLRT2;ADAMTS19;RDH11;FLRT3;SYNDIG1;CHST15;LHPP;VTI1B;S100A10;ABCA1;JUP;CADM1;THAP12;CDC7;EIF2AK4;L1CAM;GPR137C;CPEB1;ARL2BP;SFXN4;DCHS1;PAM;CPEB2;GSTM6;EZH2;PHF2;LAD1;SETD2;MOCS3;ARHGAP1;TCF20;MED16;SHB;LYST…
PVALB Interneuron Gene Module From Human Brain PMID20616000	45/152	3.47e-07	1.43e-06	0	0	2.64154	39.2905	HLF;IGSF3;IRS1;MTCL1;ITPR1;5730455P16RIK;LDB2;CLGN;ARNTL;RIMS3;CUX2;PRKAR2B;SNTG1;AKT3;TBC1D30;CHN1;SACS;SMYD2;CAMTA1;NEFL;PIP5K1B;NEFM;DLGAP2;NEFH;ZFP365;BEND5;RGS7;KCNJ3;PHYH;ANKRD34C;LRRN3;PLEKHA6;DCLK1;GULP1;TIAM2;ARHGAP32;PCP4;RALYL;G6PC3;KCNS1;NOVA1;TLN2;R3HDM1;SSX2IP;CDH18
Genes Down-Regulated In Friedreich Ataxia iPSCs Expression Vs HUVEC-BF4 Cell Line GSE22651	778/4852	3.53e-07	1.46e-06	0	0	1.2605	18.7269	POP5;PID1;SPINT2;HTR4;ZDBF2;COMTD1;DPYSL4;PPP4R4;PWWP2A;PKNOX1;ZFP286;HES6;STARD4;STARD7;CACNA2D2;EML4;RBP1;RABL2;SF1;ATF4;SLBP;PIF1;SAR1A;FIGNL2;IQGAP2;DEDD2;RDH11;ADAMTS19;EPB41L2;D5ERTD579E;SYNDIG1;PIP5K1B;VTI1B;ABCA1;CREBBP;CADM1;NEBL;NCAPH2;LRBA;EIF2AK4;NR2F6;DAZL;PKIB;UCK1;FAT1;SFXN4;GSTM6;EZH2;HRK;LIN54;ACHE;LAD1;KDM8;SHD;LRRC1;MMP23;PANX2;NEFL;NEFM;2610301B20RIK;NEFH;OFD1;ARG2;KCND2;ACTL6…
Genes Down-Regulated In Expression In Skeletal Muscle Of HSALR 20B Myotonic Dystrophy Mice GSE24920	396/2284	3.64e-07	1.5e-06	0	0	1.35483	20.0873	WIPF2;DCAF8;DCAF5;ALKBH6;SLC4A4;GPATCH8;AKT2;4921524J17RIK;WDR91;MBNL2;RBFOX2;9330159F19RIK;CACNA2D2;PHKA1;UPB1;RC3H2;ADCY9;SKAP2;TARSL2;NEDD4L;RIC8B;PIP5K1A;RREB1;ST3GAL2;LHPP;B3GALNT2;MYH7B;CREBBP;PRPF38B;THAP12;TMEM199;CPEB1;PPP5C;ADI1;NAPEPLD;UNC119;SFXN2;PRRT4;PHF2;ZFP367;KDM8;CLTB;MED16;SMG5;LETM2;UBL3;PCMTD1;IFNGR2;FAHD2A;PHF20L1;ANGPTL6;CDC42EP3;ADSSL1;RARB;CACUL1;GART;ZFP148;ATL2;SNX30;N…
Changes In DNA Methylation In Frontal Lobe Of AD Vs Control GSE72778	268/1460	3.67e-07	1.51e-06	0	0	1.44053	21.3464	NEXMIF;XYLT2;STMN4;ELK1;PTPDC1;HS6ST2;RPS6KA3;SOX3;ZXDB;RAVER2;KIF21B;IER5;ACVR1;RBFOX2;ACTN2;STARD8;ISLR2;PHKA1;CSNK1D;ACSL4;EBF4;MTURN;ADCY9;ADGRB1;SPIN2C;MAML3;RIN1;ASTN2;BEX3;BEX2;INTU;MAGED1;ZFP503;XKRX;FAM124A;HLCS;PENK;RRS1;TNRC18;VTI1B;SMIM10L2A;SRPK3;CADM1;CRADD;EGR4;MAGEE2;LRBA;SETD1B;EIF2AK4;L1CAM;SMARCA1;ELL2;GDF7;DAZL;GLUD1;SLC6A6;CPEB1;WNK3;MAGED2;SRPX;ZCCHC12;KCNC3;CETN2;DOC2B;SHB;…
Differently Enriched Cas9 Binding Sites In dCas9-Tet1/sgRNA Infected Vs Untreated iPSCs GSE102655	105/472	3.84e-07	1.57e-06	0	0	1.80956	26.7329	TLNRD1;NEXMIF;WIPF2;TUSC2;PPP2R2A;GBA2;SLK;AI593442;MSANTD1;BASP1;ZXDB;EP300;MAP2K3;PPTC7;IGFBP4;SKIDA1;ATP1B1;POU3F3;CACNB2;SLCO2A1;MAML3;KCTD12;OSBP2;MTMR3;ZFP503;PCDH15;BHLHE22;SLC9A3R2;GRK5;UBC;SMYD2;KCNN2;SNX7;RREB1;SLC19A2;VAT1;CBX8;KLHDC2;TMEM132A;SMAD9;HSPA2;GNAO1;STAG1;EFNA3;RALYL;LRCH1;CALM3;GRB2;CPEB2;SP9;FGF11;GSK3B;SETD2;TMEM151B;KCNK9;TRADD;SLC35F4;SOBP;LRRC1;ARMH4;UBL3;GRM8;TNKS1BP…
Friedreich Ataxia iPSCs Expression Vs hFib2-Ips5 Cell Line GSE22651	774/4828	3.98e-07	1.63e-06	0	0	1.25959	18.5609	POP5;COMTD1;PPP4R4;LIPG;PWWP2A;PKNOX1;STARD4;STARD7;FRS3;BCR;EML4;RABL2;ATF6;PLBD2;SKAP2;ATF4;SAR1A;FLII;PDGFB;AGAP3;IQGAP2;DEDD2;RHOT2;EPB41L1;RDH11;EPB41L2;1110051M20RIK;SYNDIG1;SFN;CFAP65;VTI1B;JAG2;ABCA1;JUP;TIPARP;NEBL;LRBA;L1CAM;GRIN2B;DAZL;PKIB;UCK2;FAT1;SFXN4;DCHS1;SFXN2;GSTM6;HRK;LIN54;ARHGAP1;SHB;MED16;NHSL2;TMEM44;NEFL;NELFB;PCMTD1;KCND2;SLC39A10;FAHD2A;PHF20L1;SLC7A6;SLC7A8;ADSSL1;ERG…
Up-regulated Genes In Hippocampus Of HD Q175 Mice PMID26900923	96/422	4.15e-07	1.7e-06	0	0	1.86077	27.345	GPSM1;ZCCHC12;SH3GL3;RBM28;SPON1;COL16A1;PCDHGB6;ONECUT2;MCUB;PTPRO;PCDH11X;IRS4;SPINT2;PTPRF;RPS6KA4;SAMD14;ADAMTS2;PLCZ1;NIPAL3;TIMP2;WDR6;PGM5;RSPO1;ARL10;HSDL2;PARP4;SLC6A15;TCF12;HPCAL1;TRP73;GFRA1;TEX15;MYT1;ANO2;ADAM19;CARHSP1;FIBIN;ACOT1;CMPK2;RELL1;PAFAH1B3;METTL26;SKAP2;ZFP423;CAMK2D;PLPPR1;CTBP2;CHIA1;PCDH10;FLII;SEMA3A;LYPD1;PCDH15;OPRL1;STC1;TGFA;TMTC1;KLHL13;CACNA1G;SLC9A3R2;GLRA3;T…
Influence Of Hdac4 Reduction On Expression In 9 Wk R6/2 HD Mice GSE38218	158/783	4.31e-07	1.76e-06	0	0	1.60639	23.5462	RIPOR2;WIPF2;CLSTN1;HDAC11;ZBTB20;RORA;BZW2;FBXO22;GPATCH8;CDH8;IGF1R;TXN2;CCND2;RPS16;HABP4;COTL1;CHP1;PKNOX1;ENPP5;ANKS1B;PDK1;KCNH3;PRKCI;AGTPBP1;ATP6V1G2;MIGA2;WSB2;STARD8;PPP1R16A;EPDR1;CSNK1D;SOX11;THOC3;LEMD1;BCR;SLC9A7;CCNE1;ZFP40;SLCO2A1;RRAGD;PLAA;ASPHD2;RELL2;SQSTM1;KMT2A;MGST3;HPCA;ARL2;NEDD4L;KLC1;LIAS;SMIM7;ZBTB4;MBTD1;INPP5F;EPB41L1;FLRT3;PSAP;ST3GAL2;VTI1B;BPTF;KLHDC3;CREBBP;TCAF1…
HD Markers In NSCs GSE74201	172/868	4.55e-07	1.85e-06	0	0	1.57204	22.955	RIPOR3;CPNE8;SPON1;PID1;GXYLT2;ACCS;ADARB2;COMT;TMEM266;CNTNAP5B;NDST3;SLC25A45;GUCY1A2;MLIP;SLC30A3;FBXO2;ZFP3;EPDR1;SLC6A11;UPB1;THNSL2;DKK2;ZC2HC1C;ADAM12;SLCO2A1;PKP2;ACOT2;ACOT1;SLC27A2;ACOT5;NGEF;ACOT4;ACOT3;GRB7;DIPK1C;SPTBN4;CEMIP;BEX2;KLHL14;NXPH4;HVCN1;INSIG1;CHRNA7;NTM;HPCA;LTBP2;CACNA1E;PKHD1;ARHGAP20;FAM124A;C7;HRH3;SNTG1;LDHD;KCNN1;GSG1L;SFN;DRD1;MSC;WNT1;DRD2;CCDC17;TMEM132E;GADD45…
Locuses With Decreased DNA Methylation In Frontal Lobe Of AD Vs Control GSE72778	71/286	4.56e-07	1.85e-06	0	0	2.08095	30.3825	MUS81;KDM5C;COL16A1;PCDHGB6;PCDH11X;XYLT2;RORA;LAMC1;IGF1R;SLC8A2;CRTAC1;TMSB4X;RAVER2;PIM1;IER5;HRAS;ACVR1;KIRREL3;MAP2K3;PCDHGA8;CPA2;PCDHGA6;RBFOX2;SKIDA1;CTPS2;CSNK1D;AMPD2;ZFX;ADAM19;CACNB2;ADCY9;ADGRB1;CCDC42;ASTN2;RIN1;SCN4B;GAS7;VSTM2B;LEPROT;INTU;AHNAK;ARHGEF28;ODC1;OPRL1;PRKX;RASAL1;HDAC7;ARVCF;MTHFD1L;RRS1;MAP3K20;PTK2B;TNRC18;VTI1B;CRADD;AUTS2;KCNJ11;PLEKHA2;TGFB3;SETD1B;NEK6;DAB2IP;I…
Myotonic Dystrophy 2 Markers In Human Quadriceps Muscles GSE47968	314/1757	4.56e-07	1.85e-06	0	0	1.39807	20.4119	CPNE8;FAAH;PNMAL1;TMEM200A;RAPH1;ZFP606;SLC4A4;MSANTD1;AKT3;STMN1;DZIP1L;SCN1B;DYNC2H1;MEF2A;EPHA4;MED1;MBNL2;MUSK;9330159F19RIK;LIMCH1;METTL2;CIRBP;PHKA1;SOX11;SLC6A11;VWA5B2;SYTL5;MTURN;EML4;CRISPLD1;DAAM1;HECW2;AKAP9;VDAC2;RNF122;ATF4;NECAB2;BEX3;TMTC1;HIF1A;SEC14L1;CHTF8;HSPH1;1110051M20RIK;D5ERTD579E;INPP5J;PIP5K1B;KCNN2;TNRC18;TSPAN3;SNX7;ZBTB7A;RREB1;PPP1R26;FZD1;EGR1;NDFIP1;ARPP21;H3F3B;G…
Genes Down-Regulated In OPCs Of HD Patients Vs Control PMID32681824	89/384	4.65e-07	1.89e-06	0	0	1.90489	27.7764	RAB3C;SNAP25;SPON1;LPGAT1;GALNT13;SERPINE2;PPP1R9A;RYR3;SENP7;TUBA1B;SPRED1;BASP1;TMSB4X;DPYSL3;REV3L;PMEPA1;LRRFIP2;LRRFIP1;ANKS1B;HMGN1;TSC22D1;PRKCB;CMC2;STRBP;KCNH8;TRPC1;CIRBP;DYNLL1;SHISA9;GPCPD1;EML4;ENAH;ARMCX4;CACNB2;PCP4;SFPQ;TUBB2A;RCN2;RFX4;TAX1BP1;ASTN2;RAPGEF5;SRSF7;KCTD16;BEX3;BEX2;DDX5;PLPPR1;SHC3;SLC24A3;COL11A1;CREM;NEDD9;PTN;CACNA1E;RAP1GAP;THBS4;CACNA1G;NT5E;PCSK1N;BRINP1;KIF3…
Cingulate (Cck+), Somatosensory (Cck+) And LGN Interneuron Gene Module PMID19638972	39/125	4.69e-07	1.9e-06	0	0	2.84559	41.4677	GPSM1;POP5;ZFP467;PYCRL;MTFP1;UXS1;RGS16;SEMA3A;ABHD6;IQGAP2;C1QTNF4;DPYSL4;GRK5;ZFP52;RESP18;CCL27A;GRB10;IER5;CACNG5;HES6;CGREF1;TLE2;PLEKHA2;MRTFA;AMPD2;ENAH;FKBP1A;RCN2;PRKRA;MYO5B;CCDC88C;RIOX2;PGP;LNX1;CAMK1;CD68;CPEB2;FRYL;VSTM2B
Genes Changed In R6/2 Mice Treated With AAV9-Eif2a-Nme1-EF2a-GFP Vs Control GSE141856	73/297	4.77e-07	1.93e-06	0	0	2.05404	29.8973	RBM28;C2CD5;SETD2;CCNT2;ATP8A1;CLSTN1;RAPH1;ZBTB20;CHD3;GPATCH8;NRGN;GPI1;TLE4;EPHA4;SGIP1;ELMOD1;ZFR;CACNA2D2;LMO7;ATP1B1;EMSY;NME1;PHF20L1;EML5;ADGRB1;MTF2;NOS1AP;TAX1BP1;RBMS1;PHIP;CD47;LY6H;BEX2;MAGED1;NTM;PTN;COX5A;CACNA1E;SPATA7;CAMKK2;PCSK1N;ABLIM2;FLRT3;HLCS;UBN2;PENK;PSAP;UBC;TRA2A;TSPAN3;CKB;TAC1;BPTF;RANBP2;PRNP;NDFIP2;TCAF1;NDFIP1;TMEM30A;AUTS2;NEBL;GRIN2B;DCLK1;SRPK1;FKBP1A;NCEH1;PDE…
Genes Down-Regulated In Friedreich Ataxia iPSCs Expression Vs SC41-MSC Cell Line GSE22651	721/4470	4.8e-07	1.94e-06	0	0	1.26461	18.4001	CYFIP2;TRIR;POP5;PATJ;TLNRD1;PNMAL1;WIPF3;WDR83;SPINT2;FNBP1L;GLDN;GCSH;COMTD1;DPYSL4;PPP4R4;RAVER2;LIPG;STMN1;PWWP2A;PKNOX1;ZFP286;ANKS1B;UNC13B;RNF138RT1;HES6;MED1;PRKCI;PRKCB;STARD7;DDX11;COL23A1;CACNA2D2;SOX11;GTPBP3;EML4;ZC2HC1C;ARMC6;RBP1;FAR2;ASTN2;UBA52;ATF3;NGEF;SF1;PIF1;ZBTB8A;ANAPC16;CTBP2;FIGNL2;NEDD4L;IQGAP2;MRPL12;C9ORF72;FAM149A;DEDD2;ANAPC11;XKRX;FAM124A;HSPH1;RIC8B;PCDHA1;TERT;RD…
Genes Up-Regulated In Friedreich Ataxia iPSCs Expression Vs Control Ureter GSE22651	794/4971	4.81e-07	1.94e-06	0	0	1.25495	18.257	PID1;SPINT2;ACCS;ZFYVE27;SAMD10;MRTFA;FRS3;RBP4;ORAI3;FAR1;RABL2;ATF6;PLBD2;SKAP2;SF1;MTMR3;MEAF6;TARSL2;FLII;PDGFB;AGAP3;TAPBPL;RHOT2;C7;HLCS;EPB41L1;CFAP69;SFN;EXPH5;ZBTB7C;JAG2;ABCA1;JUP;CADM1;TIPARP;LRBA;EDEM1;NR2F1;NR2F6;NAPEPLD;SFXN4;GSTM6;PIGS;SRPX;LAD1;BHLHE41;ARHGAP1;SHB;MED16;LRRC1;HEY1;SMPD1;SH3BGRL3;NELFB;JAK2;UPF1;DUSP1;SLC39A11;BAZ1A;SLC7A4;PHF20L1;SLC7A8;BDH1;CDC42EP3;KCNMA1;ADSSL1…
HDACi-106 Treated PBMCs From Friedreich Ataxia Carriers Vs Controls GSE30933	605/3682	4.9e-07	1.97e-06	0	0	1.28466	18.6636	PATJ;PID1;SERPINE2;TMEM200A;WIPF2;SPINT2;ACCS;ALKBH6;PCMT1;COMTD1;CNST;PPP4R4;4921524J17RIK;ZXDB;WDR91;STMN1;HOMER3;MPV17;ZFP286;RNF138RT1;HES6;MED1;PRKCI;MBNL2;PRKCB;STARD8;COL23A1;HPCAL1;MRTFA;FRS3;RC3H2;EML4;GPR162;DAAM1;HECW2;RBP1;PLBD2;VPS28;RNF122;SKAP2;SF1;LRPAP1;SAR1A;ANAPC16;TARSL2;FLII;AGAP3;IQGAP2;C9ORF72;HIF1A;ANAPC11;TRP53RKA;ABR;RHOT2;RDH11;S100A13;S100A10;NDFIP2;ACD;WNT10A;NDFIP1;J…
PLC Pericyte Lineage Cell-Enriched Genes PMID30078729	667/4104	5.22e-07	2.1e-06	0	0	1.27212	18.4021	TRIR;PID1;SERPINE2;RPL31;A430005L14RIK;RAPH1;EMC10;FNBP1L;GPATCH8;ZDBF2;SAMD14;4921524J17RIK;DPYSL3;NDST3;STMN1;HOMER3;MPV17;PKNOX1;IER5;MBNL2;RBFOX2;9330159F19RIK;WSB2;PRKCB;STARD7;STARD8;SOX11;SCAMP1;DKK2;EML4;DAAM2;HECW2;MAML3;ATF6;UBA52;VPS28;SF1;ATF4;LRPAP1;MTMR3;SAR1A;ANAPC16;CTBP2;CTBP1;WDR61;AGAP3;SLC30A10;MRPL12;C9ORF72;HIF1A;ADAMTS10;ANAPC11;ABR;HSPH1;FLRT2;PRKAR2B;S100A13;PIP5K1A;ZBTB7…
Top Astrocyte-Expressed Genes In Humans And Mice PMID29892006	200/1041	5.28e-07	2.12e-06	0	0	1.51586	21.9101	SPON1;SPARC;SERPINE2;SLC4A4;AKT2;DAG1;SOX9;CCNL1;PAQR7;MBNL2;LIMCH1;PHKA1;SLC6A11;TMEM170B;DAAM2;RFX4;AKAP9;SIK3;VDAC2;LRPAP1;ADCYAP1R1;PCDH10;MAGED1;SLC30A10;HIF1A;ABR;SEC14L1;RDH11;SARAF;KCNN3;TSPAN3;NTSR2;ABCA1;EGR1;CREBBP;PRPF38B;CADM1;H3F3B;NEBL;TIPARP;DCLK1;BC005537;GLUD1;SQLE;FAT1;CALM3;CYSTM1;CALM1;GSTM6;CDS2;ITM2C;SETD2;PTPRS;PTPRF;TMEM47;TRIM9;TUBA1B;MED13;UBL3;TMSB4X;REV3L;TSC22D1;DUSP…
Genes Down-Regulated In Mouse Granule Cells Vs Basket Cells GSE101914	158/786	5.49e-07	2.2e-06	0	0	1.59843	23.0404	OXTR;CCNT2;KCNG4;TLNRD1;RAB3A;WIPF3;GIMAP5;ADARB1;TXN2;PPP1CC;LSM11;CNST;DPF1;CCDC97;TRIM26;HOMER3;KIF21B;EPHB2;PPFIA3;ANKRD13A;PPP1R16B;KIRREL3;UNC13A;DGAT1;WSB2;MAMSTR;DDX11;RSAD1;LMTK3;AIP;UBALD1;CSNK1D;MFSD12;SHISA7;RNF41;ERN1;EML5;GPR162;CACNB3;HNRNPUL2;ARMC6;NCL;ORAI3;ADGRB1;MAP1A;ASPHD2;RELL2;ZFP574;SF1;KANK3;KMT2E;EPHA10;TMEM121B;HPCA;TMTC1;ZBTB4;PMF1;DEDD2;ANAPC11;HSPH1;SEC14L1;MAN2A2;SN…
Genes Up-Regulated In Mural Cells Of zQ175DN Vs WT PMID32681824	47/164	5.5e-07	2.2e-06	0	0	2.52351	36.3714	DOCK6;PCSK2;C2CD5;DOCK4;GALNT13;HIP1;ANKRD12;RORA;SLC4A4;CACNA1E;CDH8;SPATA7;IGF1R;SYNE1;NKAIN2;EPB41L2;UBN2;AKT3;DYM;ERC2;WASF2;KIRREL3;EPHA6;RBFOX2;CADM1;KCND2;DCC;KCNIP4;DDIT4L;ANO4;MPP7;FOXP1;PTPRD;CACNB2;RALYL;STAG1;DLG2;ZEB1;DAAM1;KCNMA1;CNTN4;RGS7BP;TOP1;OGT;DGKI;CDH18;YPEL2
Down-regulated Genes In Blood From The 75 Wk MJD84.2 Mice GSE108069	529/3174	5.54e-07	2.21e-06	0	0	1.30098	18.7419	PATJ;TLNRD1;WIPF2;XYLT2;SCX;WDR83;EMC10;ACCS;ALKBH6;DCAF4;ZFYVE28;GLE1;COMTD1;WDR91;SAMD10;HES6;STARD8;HPCAL1;MRTFA;GTPBP3;ORAI3;ACOT2;PLBD2;VPS28;RNF122;SF1;NAA60;LRPAP1;MTMR3;MEAF6;CTBP1;FLII;NEDD4L;AGAP3;TAPBPL;DEDD2;ANAPC11;RHOT2;HLCS;EPB41L1;LDHD;CHST15;SFN;ZBTB7A;ST3GAL2;SLC19A1;VPS16;ZBTB7C;ACD;JUP;GTF2IRD2;NCAPH2;SETD1B;L1CAM;SLC16A13;SQLE;UCK1;SFXN3;UNC119;DCHS1;PLCH2;SETD4;PIGS;PHF2;MOC…
Genes Changed In HDACi 4B Vs Vehicle Treated Friedreich Ataxia Patient Blood Cells GSE30933	224/1192	6.15e-07	2.45e-06	0	0	1.47738	21.1295	CYFIP2;SPON1;PATJ;SLC46A1;SPARC;SERPINE2;TMEM200A;XYLT2;ICAM5;ADARB1;NUBP1;RPS6KA4;PCMT1;SAMD14;CNST;HABP4;PRKCB;COG5;FBXO2;KRT2;ZFP976;AP1B1;MRTFA;ALG1;MTURN;EML4;AFG3L2;ARMC6;ORAI2;TRIB3;MXRA7;RIN1;BEX3;ANAPC16;WDR61;MRPL12;FAM171A1;HSPH1;S100A13;SARAF;PCK2;RAB11FIP5;JAG2;NDFIP2;BCL11B;TIPARP;GTF2IRD2;DELE1;CDC7;L1CAM;WDR54;SLC6A6;CALY;ADI1;FXYD2;SFXN4;PEMT;ITM2C;SETD4;ACY1;CETN2;GBE1;MRPS12;CL…
Probable Astrocyte-Enriched Genes PMID18171944	444/2611	6.16e-07	2.45e-06	0	0	1.3262	18.9654	SERPINE2;SLC4A4;GCSH;SAMD14;AKT2;MPV17;NHLRC3;STARD8;COL23A1;PHKA1;BCR;DAAM2;RFX4;ORAI3;RBP1;ACOT2;ACOT1;ATF3;PLBD2;NGEF;SKAP2;LRPAP1;CTBP2;TARSL2;WDR61;IQGAP2;SLC30A10;FAM149A;TRP53RKA;ABR;RRS1;RREB1;ST3GAL2;ZBTB7C;SLC19A2;ABCA1;FZD1;CADM1;NEBL;TIPARP;LRBA;NR2F1;THAP12;NR1D1;GLUD1;RNF103;FAT1;DCHS1;SFXN2;GSDME;PIGS;ZFP367;LPCAT1;PYGL;TMEM47;TRIM9;HEY1;AIFM2;TMEM44;SMPD1;RSPO1;3110082I17RIK;DUSP1…
Genes Down-Regulated In HD Grade 3 Markers In Human Frontal Lobe BA4 (HG-U133A) GSE3790	84/359	6.38e-07	2.53e-06	0	0	1.92731	27.493	GASK1B;GSK3B;SNAP25;HIP1;PTPRO;ARHGAP1;LYST;PTPRF;UBL3;CCND2;AKT3;ENC1;SLC16A6;GPR137;CHP1;SLC16A7;TLK1;SLC12A6;NEFH;FBXO9;IDH3A;MEF2A;EPHA4;CDV3;UPF1;PRKCI;RBFOX2;SEMA6A;PPP1R12A;NCOA3;ZFR;ETV1;KCNAB2;SCAMP1;ATP1B1;RNF41;PTP4A2;TMX4;ZEB1;SLC7A8;HNRNPUL2;KCNMA1;SIK3;CD47;TOP1;RAPGEF5;GAS7;SLC24A2;NFAT5;ZFP148;KCNA1;INSIG1;AGPAT3;BCLAF1;ATXN1;GRK2;FLRT2;SNX27;FLRT3;KIF3A;EPB41L2;NRIP1;MAP7;ZBTB7A;…
Genes Down-Regulated In Ciliated Ependymal Cells Of zQ175DN Vs WT PMID32681824	51/185	6.86e-07	2.72e-06	0	0	2.39202	33.9491	RBM28;TENM4;WWC1;RORA;GPATCH8;IGF1R;LRRC1;SOX9;STK32A;ENPP5;DYNC2H1;PRKCB;STRBP;CTDSPL;PHKA1;9930021J03RIK;ARID1A;DYNLL1;DALRD3;STIM2;SIK3;TAX1BP1;ARHGEF4;RABL2;DDX5;SLC24A4;ANKS1;CTTNBP2;ANKRD12;FBF1;ITPR1;MRO;FOXO1;TMEM164;ARVCF;ATXN1;SNX27;KIF3A;CHN2;ERICH3;UBN2;ERI3;PENK;GRIA3;LGI1;CRIM1;BAIAP2;CMSS1;KIF26B;CCDC88C;CALM1
Influence Of Hdac4 Reduction On Expression In 9 Wk WT Mice GSE38218	58/221	7.35e-07	2.91e-06	0	0	2.23832	31.6134	CREBZF;GPSM1;GPSM2;SPON1;HIP1;IRS1;SLC7A14;SHB;PPP1CC;FAM102B;PKNOX1;ARG2;EPHA6;PPTC7;STARD8;DENND2A;AMPD2;SHISA3;CYS1;KCTD4;TRDN;EML5;MYCL;PCP4;SNORC;RRAGD;CRY1;FAR1;METTL27;6430571L13RIK;KANK3;HDAC4;IGSF3;PELI2;NTN4;BHLHE22;SEC14L1;FAM184A;ABI3BP;CHN2;SLIT1;SNX7;FILIP1L;PDLIM7;CACNG5;SVIL;KCNIP1;PLEKHA2;SMIM10L1;MBD2;EEPD1;CSDC2;AQP11;TLL1;PAM;SPSB4;TUBA8;ASB1
Differentially Expressed Genes In ESC Vs iPSCs GSE85347	232/1245	7.44e-07	2.94e-06	0	0	1.46271	20.64	CPNE8;SERPINE2;STMN4;ADARB1;ZFP606;DCAF5;CYB5D2;RPS6KA4;SOX3;RPS6KA2;PDK1;EPHA4;MBNL2;LIMCH1;PRKCB;CACNA2D2;EBF4;GPR162;ADGRB2;DAAM2;ADGRB1;KCTD12;MXRA7;ATP6V0D1;UBA52;SPTBN4;BEX2;ANAPC16;CTBP1;SDC3;FIGNL2;AGAP3;SLC30A10;ZBTB4;PGS1;PCBP4;PENK;VPS8;MAP7;TNRC18;LHPP;NTSR2;TRPM4;BBS2;MYH7B;PLK3;RABGAP1L;CADM1;EGR4;NEBL;PLK2;IQSEC3;NR1D1;GPR137C;PKIB;NCEH1;GJB3;FNDC10;PCDHB5;MAGED2;LAD1;ZCCHC12;C2CD3…
Cas9 Binding Sites Enriched In dCas9-Tet1/sgRNA Infected Vs Untreated iPSCs GSE102655	103/467	7.56e-07	2.98e-06	0	0	1.7887	25.2125	TLNRD1;NEXMIF;WIPF2;TUSC2;PPP2R2A;GBA2;SLK;AI593442;MSANTD1;BASP1;ZXDB;MAP2K3;PPTC7;IGFBP4;SKIDA1;ATP1B1;POU3F3;CACNB2;SLCO2A1;MAML3;KCTD12;OSBP2;MTMR3;ZFP503;PCDH15;BHLHE22;SLC9A3R2;GRK5;SMYD2;KCNN2;SNX7;RREB1;SLC19A2;VAT1;CBX8;KLHDC2;TMEM132A;SMAD9;HSPA2;GNAO1;STAG1;EFNA3;RALYL;LRCH1;CALM3;GRB2;CPEB2;SP9;FGF11;GSK3B;SETD2;TMEM151B;KCNK9;TRADD;SLC35F4;SOBP;LRRC1;ARMH4;UBL3;GRM8;TNKS1BP1;PMEPA1;S…
Genes Changed In NPCs After HTT Knock Down GSE118088	137/665	7.8e-07	3.07e-06	0	0	1.64518	23.1384	PNMT;CPNE7;HR;FAIM2;COMT;CDH8;HS6ST2;CLEC18A;LAMP5;SYNPR;DACH1;FRRS1L;DPYSL3;NDST3;ARHGDIB;IER5;SLC16A3;KCNH2;LMO1;NANOS1;EPHA4;CHRNB4;UNC13A;FIBCD1;ATP1B1;SHISA9;OLFM2;OLFM3;NEIL2;SLC9A7;STIM2;CCNE1;ADAM12;ACOT2;ACOT1;KCTD12;ACOT5;ACOT3;OSBP2;KCTD16;CEMIP;BEX2;SPTBN5;KLHL14;PCDH10;PCDH15;STC1;AK4;GPR83;NTS;GLIS1;NKAIN2;ASIC4;BRINP2;C7;ZMAT3;ZMAT4;GSG1L;GRIA3;PLXNA4;JAG2;NEBL;TNFRSF9;IQSEC3;NR2F1…
Mouse Indirect Spiny Projection Neuron Markers (Blue Genes) PMID30811995	65/258	7.9e-07	3.11e-06	0	0	2.12029	29.7939	POP5;KCNG2;MTCH1;ACY1;ONECUT2;NPY2R;CELF3;A430005L14RIK;ADARB2;GIMAP8;ZDBF2;TMEM267;MCIDAS;PRADC1;SIX3;CCR6;MYBL1;AMN;ACTL6B;APAF1;DUSP1;KCNH8;ZFP618;CYS1;ANO2;DSG1C;POU3F4;RBP4;COL4A2;PKP2;HAP1;ATF3;PTGER4;GRB7;RGS14;FBLIM1;RGS16;DCAF12L1;LYPD1;LIN7A;NTS;THSD4;PSMC3IP;PCSK1N;C7;RRS1;SYNDIG1;EMC6;SCN3B;WNT1;RXRG;CRADD;EYA1;KCNIP2;TNFRSF9;GREB1;RAB27A;SLC4A11;DCBLD1;PER1;PPP1R1B;FOSB;SFXN2;1700001…
Genes Up-Regulated In dSPNs Of zQ175DN Vs WT PMID32681824	48/171	8.16e-07	3.2e-06	0	0	2.45153	34.369	DGKG;DPP10;TENM1;PID1;GALNT16;ONECUT2;PCDH10;PCDH11X;GREB1L;PRICKLE2;ZBTB20;ILDR2;LDB2;ADARB2;STRIP2;ABLIM1;2210408I21RIK;1110051M20RIK;GRM8;SYNDIG1;CAMTA1;PTCHD4;BRINP3;ATP9A;EEFSEC;EPHA6;KCNIP4;POU6F2;SLC4A10;LHFPL3;SYP;ANO4;USP29;KCTD8;ENAH;MGAT4C;LRFN2;RALYL;MEIS1;OLFM3;KIF26B;SLC9A9;UST;CDH12;GPR149;RIMBP2;ASTN2;CDH18
Mouse Cerebellum Stellate And Basket Cell Markers PMID19013282	322/1821	8.82e-07	3.46e-06	0	0	1.37973	19.2342	POP5;SLC46A1;TMEM200A;PITPNA;ZFP606;ACCS;ADARB2;ZDHHC1;DCAF4;NUBP1;COMTD1;LSM11;ADGRA1;AI593442;CCDC97;FBXO9;HES6;ATP6V1G2;ARL15;ACTN1;CMC2;KRT1;BOLA1;ACSL5;B630019K06RIK;FRS3;GPR162;AFG3L2;RBP4;ADGRB1;PLBD2;SKAP2;IGSF3;MAGED1;ABCB4;ANAPC11;FAM171A1;COMMD9;FLRT2;PCDHA1;NEU1;LDHD;PENK;SYNDIG1;AI413582;S100A13;PIP5K1A;KCNN1;PIP5K1B;1500009C09RIK;TSPAN3;SNX7;AMZ1;ZBED5;RAB11FIP4;ACD;NDFIP1;TMEM74B;G…
Genes Up-Regulated In Neuro2a Htt72Q-ni Vs Htt72Q-i PMID28743452	119/561	9.08e-07	3.56e-06	0	0	1.70421	23.7094	SCARB1;COL16A1;SPARC;TONSL;FAIM2;JADE2;DOCK10;RGS3;DPYSL3;DAG1;EP300;AGFG2;PRKCI;CHRNB4;IGFBP4;LIMCH1;TLE6;FOXP1;ADAM19;ACAP2;PCP4;GAREM1;RRAGD;TNIK;MXRA7;DGKI;CBFB;IGSF3;GLO1;ARHGAP19;ARHGAP18;IQGAP2;CRHR1;RHOBTB2;SLC9A1;ISOC1;PLXNA1;TNRC18;CLSPN;ST3GAL2;PLXNA4;SLC15A5;KLHDC10;ABCA1;STAT5A;CCDC18;KIRREL;JUP;LRRN3;IDH2;POU6F2;NR1D1;HSPA12A;PHC3;MOB1B;NET1;TBCK;PTK7;FAM163A;LIN54;BNC2;COL14A1;SIPA…
Brown4 Module Eigengene Expression Profile Across Striatal Astrocytes Of R6/2 And Q175 Mice PMID31619545	30/87	9.31e-07	3.64e-06	0	0	3.2973	45.7904	ZFP941;CHRNA7;SLC35D3;ELK1;RERG;FCHO1;FRRS1L;FLRT3;SLITRK4;ARHGDIB;DYM;CAR11;ZBTB7A;CAP2;ZFP341;CAP1;DMTN;ARL15;ELMOD1;MINK1;PLCL2;MRTFA;SLC39A10;NMNAT2;TBCK;RUNDC1;ADGRL1;CD68;SP9;KCTD16
Genes Up-Regulated In Genes Changed In HDACi 106 Treated Vs Untreated Friedreich Ataxia Carrier Blood Cells GSE30933	204/1074	9.31e-07	3.64e-06	0	0	1.49431	20.7512	CYFIP2;SPON1;PATJ;FAAH;SPARC;SERPINE2;ICAM5;ADARB1;ACCS;SAMD14;PPP4R4;NIPAL3;HABP4;IER5;FBXO2;FRS3;GCAT;MTURN;ASPHD2;TRIB3;MXRA7;BEX3;PNP2;MAGED1;6430548M08RIK;RHOT2;RAB11FIP5;TRPM4;JAG2;NDFIP2;WNT10A;CADM1;JUP;TMEM74B;CDC7;WDR54;NR2F6;CCDC88B;CALY;FXYD2;CYP2S1;DCHS1;CALM3;PAM;ITM2C;LRRC1;ADAMTSL5;TMEM44;TNKS1BP1;JARID2;GPRASP2;ZFP365;ANKDD1A;IZUMO4;METRN;SYP;FAHD2A;ITPKB;CDCP1;ANGPTL6;TMEM106C;T…
Genes Changed In Endothelial Cells Of R6/2 Vs WT PMID32681824	100/452	9.41e-07	3.67e-06	0	0	1.79506	24.9095	SPARC;RORA;FNBP1L;GPATCH8;HS6ST3;IGF1R;AKT3;ANKS1B;MBNL2;RBFOX2;SEMA6A;ARL15;MAGI3;FOXP1;CACNB2;ACAP2;PCP4;AKAP9;PPIG;NGEF;KMT2E;BEX2;DDX5;PCDH10;ARHGEF28;PDGFB;NEDD4L;ARHGAP18;CACNA1E;ABR;ARHGAP21;FUT8;PCSK1N;ATXN1;SNTG1;PSAP;PENK;UBC;RAB6A;RABGAP1L;CADM1;AUTS2;LRBA;NR1D1;ZWINT;GLUD1;STAG1;DIAPH2;RALYL;DLG2;NBEA;PI4KA;CDK13;ZFP644;KDM5C;HIP1;PSIP1;PPP1R9A;NRGN;SYNE1;SENP7;DBP;TMSB4X;PMEPA1;HRAS;…
Genes Up-Regulated In HD Vs Normal APCs GSE105041	141/691	9.46e-07	3.68e-06	0	0	1.62581	22.5509	CYFIP2;CEP126;PLXND1;ZBTB20;ZFP606;COMT;2900026A02RIK;CLEC18A;ZDBF2;DACH1;SCN11A;GRB10;SACS;SLC16A7;PHLDA1;DYNC2H1;NANOS1;SEMA6C;SEMA6A;KIRREL2;9330159F19RIK;ACTN2;MAGI3;LIFR;TIAM2;TIAM1;OLFM2;AKAP9;SPATA13;SELENOV;PHIP;MAML3;TNIK;WDFY2;COL17A1;BRSK2;HVCN1;ILDR2;LIN7A;BHLHE22;NDRG2;RASGRP2;ADAMTS10;PHF21B;ARHGAP21;SNN;PCSK1N;FAM124A;FLRT2;ADAMTS19;CASKIN1;SYNDIG1;DRD1;SRGAP1;PLXNA4;FGF22;ABCA1;PL…
Friedreich Ataxia iPSCs Expression Vs MR90C2P28 Cell Line GSE22651	683/4231	9.95e-07	3.87e-06	0	0	1.26132	17.4317	TRIR;PNMAL1;WIPF3;EMC10;FNBP1L;GLE1;GCSH;SAMD14;ZFYVE27;PPP4R4;WDR91;STMN1;PKNOX1;IER5;ZFP286;RNF138RT1;MED1;PRKCI;IAH1;WSB2;NHLRC3;COL23A1;CACNA2D2;MRTFA;SOX11;GTPBP3;BCR;EML4;ZC2HC1C;GPR162;DAAM1;ORAI3;FAR1;RABL2;UBA52;PLBD2;VPS28;ATF4;SLBP;LRPAP1;PIF1;MTMR3;SAR1A;PDGFB;FIGNL2;AGAP3;PRDM10;DEDD2;FAM171A1;RHOT2;FAM124A;RIC8B;RDH11;FLRT3;EPB41L2;D5ERTD579E;1110051M20RIK;LDHD;RRS1;VTI1B;S100A10;JA…
Genes Down-Regulated In Expression In Caudate Nucleus Of 18 Mon HdhQ150 HD Mice GSE32417	2022-08-09	1.06e-06	4.12e-06	0	0	49.882	686.12	RYR1;PDE10A;ADORA2A;GPX6;PENK;SLC4A11;GPR6;SCN4B
Genes Down-Regulated In WT Vs R6/1 Both Treated With AAV2/1-control GSE139847	35/110	1.07e-06	4.14e-06	0	0	2.92588	40.2296	RBM28;ZCCHC12;PATJ;ITIH3;SPARC;GALNT16;PTPRO;IRS4;ZBTB20;SPINT2;LTBP3;PTPDC1;ZDBF2;SAMD14;TIMP2;SLIT1;WDR6;LZTS2;GPRASP2;VAT1;TMEM255A;PCDH20;GAA;KRT1;SLC6A11;TMEM130;DLK1;BAIAP3;TPPP3;ARMCX6;AMOTL1;HAP1;LY6H;ERGIC3;ZCCHC3
Genes Down-Regulated In Friedreich Ataxia iPSCs Expression Vs SC31-MSC Cell Line GSE22651	750/4693	1.11e-06	4.29e-06	0	0	1.25044	17.1465	CYFIP2;TRIR;PATJ;PNMAL1;RPL31;WIPF3;WDR83;SPINT2;FNBP1L;GLDN;GCSH;COMTD1;DPYSL4;PPP4R4;RAVER2;STMN1;PWWP2A;PKNOX1;ZFP286;ANKS1B;UNC13B;RNF138RT1;HES6;MED1;PRKCI;PRKCB;STARD7;DDX11;COL23A1;CACNA2D2;SOX11;GTPBP3;EML4;ZC2HC1C;DAAM1;RBP1;FAR2;ASTN2;UBA52;ATF3;NGEF;ATF4;SLBP;PIF1;ZBTB8A;SAR1A;ANAPC16;CTBP2;FIGNL2;NEDD4L;IQGAP2;C9ORF72;FAM149A;DEDD2;XKRX;FAM124A;HSPH1;RIC8B;TERT;EPB41L1;RDH11;ADAMTS19;…
Genes Up-Regulated In Expression In Striatal Cells Of HdhQ111 HD Mice GSE3583	573/3488	1.14e-06	4.39e-06	0	0	1.28012	17.5215	PATJ;SERPINE2;RPL31;SCX;FNBP1L;PTPDC1;GCSH;4921524J17RIK;IER5;ZFP286;HES6;PRKCI;RBFOX2;STARD7;SCAMP1;RC3H2;DKK2;BCR;RBP1;ORAI2;SPIN2C;PLBD2;VPS28;NGEF;SKAP2;SAR1A;MEAF6;CTBP1;ENDOD1;AGAP3;TAPBPL;C9ORF72;HIF1A;ADAMTS10;HSPH1;EPB41L1;FLRT3;PRKAR2B;CHST15;S100A13;B3GALNT2;PRPF38B;WNT10A;JUP;H3F3B;SETD1B;LRBA;EDEM1;PBX2;CDC7;NETO2;L1CAM;ELL2;GLUD1;MEX3A;ADI1;GPR180;FNDC10;SFXN2;LIN54;PHF2;CDKN1A;RSPH…
Genes Up-Regulated In Expression In NSCs Lines HD109i.1 And HD60i.4 From HD Patients GSE37517	346/1982	1.16e-06	4.49e-06	0	0	1.35991	18.5816	CPNE8;PATJ;WDSUB1;SERPINE2;TMEM200A;WIPF3;PPP2R2A;ICAM5;SLC4A4;IKZF5;NUDT4;RPS6KA3;SYNPR;GOLGA4;SCN11A;AKT3;DPYSL3;NDST3;RAVER2;WDR91;NIPAL3;HABP4;LGALS8;CCNL1;EPHB2;PDK1;DYNC2H1;STARD4;EPHA6;UNC13A;ARL15;SLC6A15;ZFP976;RSAD1;PHKA1;ACSL4;CMBL;SCAMP1;TIAM2;TIAM1;RBP4;DAAM2;RFX4;TRIB3;CCDC82;BEX3;BEX2;INTU;EPB41;TMEM63C;PNP2;LYPD1;TGFA;FIGNL2;TMTC1;IQGAP2;C9ORF72;CRHR1;SEC14L1;C7;PRKAR2B;NEU1;SARAF…
Genes Changed In Meclizine Treated STHdhQ111 Vs Control GSE129143	515/3099	1.18e-06	4.54e-06	0	0	1.29379	17.6621	WIPF2;A430005L14RIK;SCX;EMC10;DCAF5;COMTD1;CNST;AKT3;MPV17;RBFOX2;IAH1;NHLRC3;STARD7;DDX11;MRTFA;WDR73;BCR;DAAM2;MAP1A;ORAI2;ACOT2;ATF6;PLBD2;ATF3;RNF122;ATF4;PIF1;ANAPC16;CTBP2;FLII;IQGAP2;C9ORF72;FLRT2;PRKAR2B;EPB41L2;D5ERTD579E;RRS1;CHST15;S100A13;AMZ1;ST3GAL2;SLC19A1;S100A10;SLC19A2;B3GALNT2;ABCA1;FZD1;PLK3;NDFIP2;WNT10A;JUP;GTF2IRD2;SETD1B;LRBA;ERLIN1;ELL2;PHC3;TMEM199;SLC6A6;GLUD1;ADI1;SFXN…
Genes Down-Regulated In Neuro2a Htt72Q (72Q-ni+72Q-i) Vs Htt25Q (25Q-ni) PMID28743452	377/2185	1.21e-06	4.63e-06	0	0	1.34317	18.3058	LPGAT1;TLNRD1;PITPNA;TONSL;UBE2L6;ZFP606;PTPDC1;ZDBF2;GCSH;GLE1;FRAT1;CNST;AKT3;STMN1;DZIP1L;PWWP2A;CCDC97;FBXO9;MED1;PRKCI;9330159F19RIK;STARD7;DDX11;CMC2;ALG5;ZFP976;ACSL5;ADGRA3;YOD1;SOX11;RC3H2;EML4;TIAM1;EML5;NEIL2;ARMC6;FAR1;TLN2;MXRA7;CCDC82;TRIM11;SLBP;PIF1;GCDH;ADCYAP1R1;NECAB3;TARSL2;ZBTB1;HNRNPLL;IQGAP2;MRPL12;ACTR3B;ADAMTS10;RHOT2;HSPH1;RACGAP1;TERT;INPP5F;EPB41L1;HLCS;TNRC18;SNX7;ZBT…
Differentially Expressed Soluble Proteins In Striatum Of 8 Wk R6/2 Mice PXD004973	327/1860	1.24e-06	4.76e-06	0	0	1.36991	18.6311	SERPINE2;RPL31;WIPF3;1700001L19RIK;PPP2R2A;UBE2L6;ICAM5;ADARB2;SLC4A4;HS6ST2;RPS16;DPYSL4;4921524J17RIK;DPYSL3;DPF1;DAG1;PTGFRN;PDK1;EPHA4;MBNL2;RBFOX2;STARD7;ACTN1;FIBCD1;BOLA1;CACNA2D2;GPR165;CARHSP1;ARMC6;MAP1A;RRAGD;VDAC2;FAR1;KDELR2;KCTD12;PLBD2;TRIM11;NGEF;SF1;NECAB2;IGSF8;SPTBN5;BEX2;NECAB3;CTBP1;PNP2;SDC3;OMA1;HNRNPLL;ACTR3B;OSGEP;GMCL1;ANAPC11;COMMD9;EPB41L1;PCBP4;NEU1;KCNN1;OTOF;N4BP2;R…
Striatum RNA M24 Module (Darkgrey) PMID26900923	56/214	1.25e-06	4.79e-06	0	0	2.22854	30.2901	CATSPERG1;ZCCHC12;KCNG2;TMEM200A;RASGRF2;SLC35F4;NPY2R;IRS4;1700001L19RIK;ELFN1;RXFP3;PLCZ1;GRB10;WDR6;SCN5A;ARL10;GAA;HPCAL1;NGB;EBF4;TMEM130;GPRIN2;HAP1;ADCYAP1R1;CABP7;LYPD1;ADCY2;RASAL1;ATP2C2;NTS;SLC1A6;NTN1;LBHD2;ALDH3B2;GLRA3;TERT;OTOF;USP51;SH2B2;PLXNA3;VAT1;KIRREL;TMEM132E;CADM1;IQSEC3;ECEL1;ATP2B4;PNMA3;SEMA4F;GRHL1;6330403K07RIK;DLK1;BAIAP3;HCRTR1;SDK1;PLCXD3
Expression In Mbnl1/2 KO MEFs Treated With Mbnl3 siRNA Vs Untreated WT MEFs GSE60487	290/1622	1.27e-06	4.85e-06	0	0	1.39503	18.9418	CYFIP2;TRIR;CPNE8;SLC46A1;SERPINE2;XYLT2;EMC10;ZFP606;FNBP1L;GPATCH8;NUBP1;COMTD1;LSM11;DPYSL4;HABP4;LGALS8;SCN1B;AGFG2;HES6;PRKCI;STARD4;ACTN1;FBXO2;CIRBP;SOX11;ZFP618;RC3H2;GAREM1;ADGRB2;HECW2;XRN2;VPS28;LRPAP1;ANAPC16;CTBP2;MEAF6;SDC3;PDGFB;SMIM7;TRP53RKA;NKAIN3;SEC14L1;FLRT2;ZFP180;NEU1;ERI3;VPS8;SFN;RREB1;EXPH5;RAB11FIP5;TMEM86B;CADM1;GREB1;NR1D1;L1CAM;GPR137C;SQLE;KLHDC8A;FXYD2;ZFAT;UNC119;…
Genes Up-Regulated In R6/1 Treated With PLX3397 Vs Vehicle Treated WT Mice GSE136158	99/450	1.39e-06	5.3e-06	0	0	1.78161	24.0295	CEP126;RAB3C;GALNT13;DGKB;NEXMIF;PCDH11X;ADARB2;SLC4A4;CARF;CDH8;HS6ST2;DOCK10;CNTNAP5B;CHORDC1;GRB10;MBNL2;SEMA6A;CACNA2D2;ZFP619;SYTL5;KCTD8;GPRIN2;GPR165;RAB30;OLFM3;FAR1;CCDC82;UBA6;PCDH15;NKAIN3;INPP5F;ISOC1;N4BP2;SCN3A;BRINP3;OSBPL8;KIRREL;ZFP638;NEBL;SUCO;FAM199X;SMARCA1;TMEM196;PLCXD3;CYP2S1;WNK3;CAPRIN2;CREBRF;ZFP644;TENM1;ZC3H6;GRM1;TMEM47;SENP7;DSTYK;MED13;SIX3;REV3L;ITGB8;ZFP280D;ADAM…
Genes Up-Regulated In Expression In Striatum Of 11 Mon BACHD-deltaN17 HD Mice GSE64386	238/1293	1.4e-06	5.34e-06	0	0	1.44048	19.4167	TRIR;SLC46A3;FAAH;A430005L14RIK;PTPDC1;SAMD14;TRIM26;LGALS8;UNC13B;HES6;STARD7;ENTPD5;ALG5;CIRBP;ACSL5;VWA5B2;GPR162;CARHSP1;ACOT1;KDELR2;RABL2;CCDC82;VPS28;SKAP2;BEX2;IGSF3;PCDH10;MAGED1;FLII;MGST3;ENDOD1;OMA1;PPL;STRIP1;PRRC1;PCBP1;NEU1;DPH3;S100A13;SARAF;N4BP2;PPP1R26;VAT1;FIS1;ACD;GTF2IRD2;SLC35E3;THAP12;PARVA;NET1;TMEM199;CDAN1;NCEH1;ADI1;GKAP1;NAPEPLD;FNDC10;MAGED2;PHF2;CDKN1A;TRAM1;CCDC126…
Genes Down-Regulated In Expression In Quadriceps Muscle Of 16 Wk Mbnl1 KO Myotonic Dystrophy Mice GSE39911	159/804	1.41e-06	5.36e-06	0	0	1.56514	21.0882	RIPOR2;SERPINE2;IRS1;HDAC11;PPP2R2A;DCAF5;BZW2;CYB5D2;PPP1CB;LAPTM4B;TMEM267;FNTA;AKT2;FPGT;SLC16A7;LGALS8;KIFAP3;ENPP5;SCN1B;LZTS3;MEF2A;EPM2A;ACVR1;IAH1;IGFBP3;CMC2;TPM1;B630019K06RIK;VRK3;SLC9A2;TIAM1;RAB30;SUB1;RABL2;SNRNP25;ISCU;IPPK;ZFP467;DIPK1B;PFKFB3;PKDCC;CBFB;SMYD5;CHRNA4;INSIG1;CHRNA7;LTBP3;ZBTB4;PHF21A;RACGAP1;GRK5;PCBP4;1110051M20RIK;PENK;PSAP;ISOC1;SARAF;PIP5K1B;RAB6A;LONRF1;SLC19A…
Genes Down-Regulated In HD Markers In Human Fibroblasts GSE45516	205/1087	1.46e-06	5.55e-06	0	0	1.4807	19.8962	TLNRD1;A430005L14RIK;OGFOD3;PPAN;UBE2L6;ELK1;GPATCH8;NDST1;FRAT1;ARL6IP4;HOMER3;MPV17;SAMD10;AGFG2;EPHA4;CSNK1D;GCAT;CARHSP1;TRIB3;ATP6V0D1;ATF3;PLBD2;GCDH;ADCYAP1R1;PCDH10;CTBP1;MRPL12;SEC14L2;DGUOK;ERI3;ZBTB7A;SNX8;SLC19A1;STAT5A;PLK3;GPR12;GADD45B;NR1D1;WDR54;PKIB;SQLE;CALY;ARL2BP;FNDC10;PSMG4;PEMT;ANP32B;NOL12;GSDME;TENM1;ACY1;DIRAS1;MRPS12;SNX11;MED16;PANX2;AKAP13;AIFM2;CHMP1B;TNFAIP8L1;HRAS…
Striatum RNA M54 Module (Navajowhite2) PMID26900923	28/80	1.51e-06	5.75e-06	0	0	3.37191	45.1889	SRXN1;GLO1;CLTB;SPG7;MRM1;ENHO;HEBP2;CKMT1;FNTA;5730409E04RIK;NTMT1;NEU1;HABP4;KCNN1;NT5M;SAMD10;SCN1B;B3GAT3;PUS1;SARS;DNAJC15;UCHL5;SLC25A39;ARL2BP;CSDC2;MOB2;HCN2;ATF4
Cortex Coexpressed Gene Module 2 PMID17101986	77/328	1.61e-06	6.1e-06	0	0	1.93333	25.7897	TUSC2;ZBTB20;LDB2;PTPRF;RGS4;SPRED2;CCND2;RIMS3;NNT;BASP1;STMN1;ENC1;ENSA;NEFL;TLK1;NEFM;EPHB2;ERC2;ZFP365;YWHAH;EPHA4;WSB2;SLC30A3;PRKCB;DDX11;KCNAB2;DYNLL1;ETV5;TMX4;SFPQ;DOK5;MAP1A;CDH12;RIN1;LY6H;HDAC5;NECAB3;HLF;RALB;MGST3;CHRNA7;SLC1A1;KATNB1;NRXN2;ADCY2;FAM169A;BRINP2;CUX2;5730409E04RIK;CHN1;SPOP;KCNN1;LRRC8B;RAB6A;GRIA3;VTI1B;CAP2;BPTF;ZFP638;RASL10A;ATP2B4;PNMA2;HSPA12A;DCLK1;GULP1;SYT17…
Genes Up-Regulated In Expression In Mbnl1/2 KO MEFs Treated With Mbnl3 siRNA Vs Untreated WT MEFs GSE60487	286/1601	1.63e-06	6.16e-06	0	0	1.39281	18.5642	CYFIP2;TRIR;CPNE8;SLC46A1;SERPINE2;XYLT2;EMC10;ZFP606;FNBP1L;GPATCH8;NUBP1;COMTD1;LSM11;DPYSL4;HABP4;SCN1B;AGFG2;HES6;PRKCI;STARD4;ACTN1;FBXO2;CIRBP;SOX11;ZFP618;RC3H2;GAREM1;ADGRB2;HECW2;XRN2;VPS28;LRPAP1;ANAPC16;MEAF6;SDC3;PDGFB;SMIM7;TRP53RKA;NKAIN3;SEC14L1;FLRT2;ZFP180;NEU1;ERI3;VPS8;SFN;RREB1;EXPH5;RAB11FIP5;TMEM86B;CADM1;GREB1;NR1D1;L1CAM;GPR137C;SQLE;KLHDC8A;FXYD2;ZFAT;UNC119;EZH2;PHF2;TEN…
Genes Down-Regulated In Expression In Retina Of 9 Wk R7E Spinocerebellar Ataxia 7 Mice GSE3634	69/285	1.74e-06	6.57e-06	0	0	2.01137	26.6775	PIGS;HIP1;PRDM5;HK1;RGS4;PCMT1;LAPTM4B;COMTD1;GRB10;NEFL;CLBA1;FBXO9;PDK1;HMGN1;YWHAH;LMO1;PIAS3;USP48;PRMT7;HMGCS1;PRKCB;STRBP;HPCAL1;KCTD1;DYNLL1;DUSP7;MAK;TRIB3;VSTM2A;KANK3;VSTM2B;NECAB2;DDX6;DDX5;ANKS1;AW549877;CIPC;SDC3;PCDH15;GPR85;KCNA5;NDRG2;FAM169A;ADD1;NT5E;PCBP4;EPB41L2;PGK1;STX3;ATP6V0E2;GABRD;MAP4K3;BBS2;TRMT10A;KCNIP1;PTGES2;DCLK1;PLEKHA7;MAPK12;CDK8;CNOT6;PFKL;SLMAP;COL7A1;UNC119;…
Genes Up-Regulated In Expression In HD180i.5 NSCs From HD Patient Vs NSCs From Healthy Controls GSE37517	367/2128	1.79e-06	6.75e-06	0	0	1.34093	17.7465	SPARC;SERPINE2;TMEM200A;HDAC11;RAPH1;ADARB1;ACCS;ZDHHC1;RPS6KA4;NDST1;AKT2;NDST3;PKNOX1;TBC1D10A;FBXO9;MEF2A;EPHA6;IAH1;WSB2;STARD8;ZFP3;ACSL5;ALG1;TIAM2;GAREM1;FNDC4;CRISPLD1;DAAM2;ORAI3;ACOT2;ACOT1;FAR2;KCTD12;TLN2;MXRA7;RIN1;ATP6V0D1;ACOT5;KCTD15;VPS28;ACOT3;PCDH10;MGST3;ZBTB1;ENDOD1;TMTC1;TAPBPL;IQGAP2;ACTR3B;PPL;ADAMTS10;FAM149A;COMMD9;FLRT2;CHST15;TNRC18;SNX9;SNX7;ST3GAL2;ABCA1;FZD1;FIS1;RA…
Genes Up-Regulated In Friedreich Ataxia iPSCs Expression Vs HSF6 Cell Line GSE22651	390/2279	1.8e-06	6.77e-06	0	0	1.33014	17.5974	CYFIP2;PATJ;RAPH1;TEX47;RAVER2;WDR91;LIPG;STARD7;MRTFA;SOX11;FRS3;BCR;DAAM1;FAR1;RABL2;ATF3;PLBD2;VPS28;SF1;MTMR3;MEAF6;FLII;PDGFB;NEDD4L;PRDM10;TRP53RKA;FAM171A1;HLCS;FLRT3;CHST15;SFN;RREB1;SLC19A1;EXPH5;S100A10;JAG2;PRPF38B;NDFIP2;JUP;LRBA;NETO2;INO80;NR2F6;GPR137C;ARL2BP;SFXN4;CDK13;PAM;CPEB2;EZH2;PHF2;SETD2;MOCS3;TGFB1I1;ARHGAP1;MED16;SHB;WDR44;TIMP2;TNKS1BP1;NELFB;JAK2;ZFP365;GPRASP2;UPF1;SH…
Genes Down-Regulated In Mural Cells Of HD Patients Vs Control PMID32681824	103/476	1.9e-06	7.15e-06	0	0	1.7446	22.9797	PID1;SPARC;DGKB;RAPH1;PTPDC1;DACH1;RPS6KA2;SCMH1;SLC16A6;PHLDA1;ANKS1B;GUCY1A2;PRKCB;TPM1;CIRBP;ZFP619;EML4;PCP4;SELENOM;FRMD6;COL4A2;DAAM2;PKP2;SQSTM1;SRSF7;LRPAP1;BEX3;DDX5;NTM;ANKRD12;CREM;LIN7A;LTBP2;GRK3;GRK5;EPB41L2;PENK;DPH6;TAC1;SLC19A1;EGR1;KIRREL;ARPP21;GADD45B;AUTS2;PDE2A;RANBP17;KLHL23;HSPA12A;SSH1;PBP2;SDK1;UCK2;ITGBL1;AMOTL1;CNTN4;CALM1;ITM2C;SNAP25;LDB2;RERG;AKAP12;TMSB4X;GRM8;REV3…
Up-regulated Genes In White Adipose Gonadal Tissue Of HD Q175 Mice PMID26900923	370/2149	1.9e-06	7.15e-06	0	0	1.33833	17.6281	CYFIP2;PATJ;FAAH;NEXMIF;RAPH1;SAMD14;RPS6KA2;AKT3;DPYSL3;NDST3;NIPAL3;PTGFRN;KIF21B;SLC12A6;TNS4;AGFG2;DYNC2H1;MEF2A;EPHA4;STARD4;MBNL2;MUSK;LIMCH1;PRKCB;COG5;ACTN1;STARD8;SLC6A15;ISLR2;MRTFA;ZFP618;EML4;TIAM1;SFRP4;ADCY9;CRISPLD1;DAAM1;HECW2;KCTD12;ATF6;PLBD2;NGEF;CTBP2;IGSF3;SDC3;ENDOD1;TGFA;NEDD4L;STC1;6430548M08RIK;TMTC1;IQGAP2;ZBTB4;PRDM10;PKHD1;FAM171A1;ABR;SEC14L1;HLCS;INPP5J;PIP5K1A;GSG1L…
Genes Changed In Blood From The 75 Wk MJD84.2 Mice GSE108069	534/3241	2.07e-06	7.77e-06	0	0	1.2806	16.7599	PATJ;TLNRD1;WIPF2;XYLT2;SCX;WDR83;EMC10;ACCS;ALKBH6;DCAF4;ZFYVE28;GLE1;COMTD1;WDR91;SAMD10;HES6;STARD8;HPCAL1;MRTFA;GTPBP3;ORAI3;ACOT2;PLBD2;VPS28;RNF122;SF1;NAA60;LRPAP1;MTMR3;MEAF6;CTBP1;FLII;NEDD4L;AGAP3;TAPBPL;DEDD2;ANAPC11;RHOT2;HLCS;EPB41L1;LDHD;CHST15;SFN;ZBTB7A;ST3GAL2;SLC19A1;VPS16;ZBTB7C;ACD;JUP;GTF2IRD2;NCAPH2;SETD1B;NETO2;L1CAM;SLC16A13;SQLE;UCK1;SFXN3;UNC119;DCHS1;PLCH2;SETD4;PIGS;PH…
Genes Down-Regulated In Astrocytes Of zQ175DN Vs HdhQ20 PMID32681824	32/99	2.08e-06	7.78e-06	0	0	2.99262	39.1578	HRK;RYR1;SOWAHB;LRRC10B;ARL3;SRF;ITPR1;MED16;RGS4;CHN1;EIF4H;CHP1;SH3BGRL3;CLSPN;VTI1B;COX8A;OSBPL8;ARPP21;TPM2;NETO2;GPR6;KRT9;CACNB2;ARHGAP10;NT5C3B;SELENOM;AIM2;PDE10A;SLMAP;PPP1R1B;SCN4B;JCAD
Top OPC-expressed Genes In Humans And Mice PMID29892006	197/1043	2.12e-06	7.94e-06	0	0	1.48211	19.36	CYFIP2;SPON1;PID1;SPARC;SERPINE2;DCAF8;GPATCH8;DPYSL3;KIFAP3;ANKS1B;STARD7;CSNK1D;SOX11;SCAMP1;SUB1;VDAC2;LRPAP1;ADCYAP1R1;SAR1A;PCDH10;MAGED1;PCDH15;TGFA;WDR61;HIF1A;HSPH1;INPP5F;SARAF;TSPAN3;SCN3A;ABCA1;EGR1;PRPF38B;NDFIP1;CADM1;H3F3B;NR1D1;DCLK1;ZWINT;BC005537;GLUD1;SQLE;CALM3;MAGED2;CALM1;PIGS;SETD2;TRAM1;PTPRS;HIP1;PTPRF;AKAP13;TUBA1B;UBL3;TMSB4X;ENC1;ENSA;REV3L;SDF4;CAP1;KCND2;TSC22D1;DUSP1…
Rostral And Caudal Serotonergic Neuron-Enriched Genes PMID20071532	66/271	2.33e-06	8.69e-06	0	0	2.02621	26.2825	ZCCHC12;ATP8A1;IRS1;TGFB1I1;METRNL;HK1;ZDBF2;JPH4;COMTD1;ADGRA1;CRTAC1;RESP18;GRB10;TUNAR;GPRASP2;ANKS1B;CCDC112;CERS4;PRKCB;KRT1;ACSL5;EBF4;SYP;TMEM150C;FOXP1;CACNB2;GPRIN2;HBEGF;NECAB2;CCDC149;ENDOD1;OPRL1;TMEM164;FGD5;PCDHA1;FAM184A;BC030500;CLMN;GNG4;PENK;CDH22;SCN3B;CCDC184;S100A10;CGREF1;TMEM30A;XRCC4;NEBL;1500011B03RIK;TPBG;PDE2A;TRPV2;HTR1B;SMARCA1;USP29;ZWINT;BAIAP3;SYT17;MGAT4C;RALYL;TS…
Cortex RNA M38 Module (Plum1) PMID26900923	56/218	2.34e-06	8.72e-06	0	0	2.173	28.1749	HRK;POP5;SCARB1;KCNC3;WWC1;METRNL;CXCL14;AKT2;LIPG;PMEPA1;PPP1R16B;KCNH4;PAQR7;UNC13A;STARD8;TESC;FST;PLA2G4B;KCTD1;DUSP7;DISP3;OBSCN;SLC9A5;CCKBR;COL4A2;RTN4RL1;PITPNM3;PXDN;GPD1;MXRA7;SOWAHA;RIN1;PPM1F;TRP53I11;FGD5;SEC14L1;ABLIM2;EPB41L1;CYP11A1;PTK2B;SFN;EGLN1;LINGO1;SEMA4A;TMEM86B;AOC2;LINGO3;RASL10B;KCNIP2;KCNIP3;IQSEC3;ARHGAP33;SGSM2;FGFR3;PTPN5;HSPA1A
Genes Up-Regulated In dSPNs Of R6/2 Vs WT PMID32681824	74/315	2.48e-06	9.22e-06	0	0	1.93409	24.9649	TENM1;RAB3C;SNAP25;PID1;NEXMIF;PCDH11X;ZBTB20;ADARB2;SOBP;GPATCH8;EPB41L4B;SENP7;EP300;ADAMTS6;UNC13B;MLIP;EPHA6;COG5;SGIP1;MAGI3;ANO4;ENAH;DNAJC1;NCOR1;OLFM3;CDH12;PHIP;CFAP54;SOS2;CDH18;CAMK2D;SLC24A3;PCDH10;ANKRD12;GREB1L;PRICKLE2;PPM1H;LIN7A;NYAP2;ZFP804A;STK3;FGD4;ARHGAP21;ABLIM1;BTAF1;2210408I21RIK;CCDC85A;1110051M20RIK;TRA2A;PIP5K1B;PTCHD4;BRINP3;KLHDC10;KCNJ3;LGI1;CREBBP;MBD5;PCDH7;RANBP1…
Genes Up-Regulated In Friedreich Ataxia iPSCs Expression Vs hFib2-Ips5 Cell Line GSE22651	413/2438	2.48e-06	9.22e-06	0	0	1.31504	16.9736	CYFIP2;POP5;GLE1;COMTD1;PPP4R4;WDR91;LIPG;IAH1;PRKCB;STARD7;FRS3;DKK2;BCR;ADCY9;MAP1A;ACOT2;SPIN2C;ACOT1;RABL2;ASTN2;ATF6;ACOT5;PLBD2;VPS28;ACOT3;CTBP2;CTBP1;FLII;PDGFB;AGAP3;C9ORF72;FAM171A1;RHOT2;EPB41L1;1110051M20RIK;LDHD;SYNDIG1;CHST15;SFN;ST3GAL2;S100A10;JAG2;NDFIP2;JUP;NEBL;LRBA;L1CAM;DAZL;PKIB;HNRNPM;SQLE;UCK2;PCDHB6;SFXN4;SFXN2;CPEB2;GSTM6;CDKN1A;TGFB1I1;ARHGAP1;CLTB;MED16;SHB;TCTN3;TMSB4…
Genes Up-Regulated In Friedreich Ataxia iPSCs Expression Vs Control Adrenal Gland GSE22651	752/4732	2.56e-06	9.49e-06	0	0	1.23989	15.966	CYFIP2;PID1;PNMAL1;TMEM200A;RAPH1;ADARB1;ACCS;HTR4;DCAF5;PTPDC1;GLDN;GLE1;CNST;ZFYVE27;RAVER2;WDR91;MPV17;ANKS1B;MBNL2;IAH1;NHLRC3;STARD8;FIBCD1;HPCAL1;PHKA1;WDR73;FRS3;ZC2HC1C;ADCY9;DAAM1;DAAM2;ORAI3;MAP1A;RBP1;ACOT2;ACOT1;ATF6;ACOT5;PLBD2;VPS28;NGEF;RNF122;ACOT4;SKAP2;ACOT3;MTMR3;ANAPC16;MEAF6;TARSL2;ABCB4;ENDOD1;NEDD4L;WDR61;AGAP3;TAPBPL;C9ORF72;TRP53RKA;ABR;FLRT2;C7;HLCS;EPB41L1;CHST15;S100A1…
Genes Changed In HD Fibroblasts Treated With ZFP-C Vs Control GSE127820	335/1927	2.6e-06	9.64e-06	0	0	1.35076	17.3712	LPGAT1;TMEM200A;PITPNA;RAPH1;EMC10;PPP2R2A;ELK1;SLC4A4;CYB5D2;NUDT4;ZFYVE28;NDST1;COMTD1;AI593442;OGFOD1;DPYSL3;DPF1;HOMER3;LGALS8;EPHB2;AGFG2;FBXO9;PDK1;IL15RA;EPHA4;PAQR7;9330159F19RIK;WSB2;LIMCH1;COG5;STARD7;RSAD1;HPCAL1;BOLA1;SCAMP1;FNDC4;CEP57L1;HECW2;CSNK2B;MAP1A;ORAI2;SIK3;SPIN2C;ASPHD2;TRIB3;KDELR2;KCTD12;MXRA7;ACOT4;ATF4;CTBP2;MAGED1;PNP2;NEDD4L;STC1;PRDM10;C9ORF72;SEC14L2;FAM171A1;ABR;F…
Genes Changed In OPCs Of zQ175DN Vs WT PMID32681824	35/114	2.69e-06	9.97e-06	0	0	2.77708	35.616	SLC24A2;PID1;HIP1;SEMA3D;NTM;PCDH11X;PCDH15;GRIK1;RYR3;HS6ST3;NKAIN2;CDH20;UBN2;PENK;REV3L;SLIT3;CKB;ERC2;BRINP3;ZSWIM5;RGS7;KIRREL3;EPHA6;AUTS2;KCND3;KCNIP4;PHKA1;GRIN2B;PTPRD;RALYL;STAG1;VCAN;PHIP;GALNTL6;RGS7BP
Genes Changed In HD Vs Normal APCs GSE105041	298/1689	2.86e-06	1.06e-05	0	0	1.37204	17.5147	CYFIP2;SPON1;SERPINE2;XYLT2;SCX;SPINT2;ZFP606;ACCS;SLC4A4;ZDBF2;NDST1;SCN11A;RPS6KA2;PPP4R4;NDST3;LGALS8;DYNC2H1;IAH1;9330159F19RIK;ACTN2;STARD8;TIAM2;TIAM1;SPATA13;AKAP9;MAML3;SKAP2;BEX3;SPTBN5;MAGED1;PCDH10;ZFP503;PCDH15;ADAMTS10;NKAIN2;FAM124A;FLRT2;ADAMTS19;STC2;SYNDIG1;CHST15;AMZ1;PCK2;EXPH5;ABCA1;WNT10A;PLK5;LRRN3;GADD45B;FAM78A;PDE2A;NETO2;HSPA12A;ELL2;GRIN2B;DCLK1;PKIB;NCEH1;CALY;PTK7;CYP…
Striatum Protein Module pM21 (Darkred) PMID26900923	46/168	2.89e-06	1.07e-05	0	0	2.36704	30.1888	CYFIP2;GSK3B;PCDHGB6;AHNAK;TUSC3;SLC1A1;KCNA4;FNBP1L;IQGAP2;LYST;RAP1GAP;PGS1;ASIC4;BRINP1;DHX32;EPB41L1;NARS2;SACS;PTK2B;LRRC8B;STX3;SLC25A23;CACNG3;PLXNA4;BOK;LINGO1;PRMT8;UNC13A;SMAD3;SYT2;KCNIP2;GABRA4;PCDH7;TDRD7;ALG1;ARID1A;GRIN2B;GULP1;SRPK1;YIF1B;DIAPH2;PFKL;ADGRB2;STIM2;KCNMA1;SGK3
Cortex RNA M10 Module (Purple) PMID26900923	44/158	2.9e-06	1.07e-05	0	0	2.42237	30.8896	MTCH1;DIPK1B;RAB3A;PEF1;CLEC2L;HDAC11;TMEM59L;A430005L14RIK;COMT;ATP5G1;TXN2;TIMM50;RND1;SRM;ALAD;MAEA;COMMD9;5730409E04RIK;SMPD1;ERI3;NEU1;PSAP;AI413582;EIF4H;STX6;EMC4;NT5M;1500009C09RIK;APBB1;SAMD1;KLHDC3;EIF2B2;WARS;CACFD1;NCAPH2;TMUB2;CTDNEP1;OLFM2;PPP5C;BDH1;DOK5;CYSTM1;CAMK1;RETREG2
Genes Down-Regulated In HDACi-106 Treated PBMCs From Friedreich Ataxia Carriers Vs Controls GSE30933	336/1936	2.93e-06	1.08e-05	0	0	1.34788	17.1742	PATJ;PID1;WDSUB1;SERPINE2;TMEM200A;WIPF2;IKZF5;RPS6KA3;PCMT1;CNST;PPP4R4;4921524J17RIK;ZXDB;STMN1;ARL6IP4;ZFP286;ACVR1;RNF138RT1;HES6;MED1;PRKCI;MBNL2;ARL15;PRKCB;ACTN1;METTL2;ALG5;ZFP976;ZFP619;ACSL4;RC3H2;DSG1C;THAP1;EML4;DAAM1;SUB1;HECW2;VDAC2;MXRA7;RNF122;SF1;SAR1A;ANAPC16;TARSL2;EPB41;HNRNPLL;LIAS;C9ORF72;HIF1A;GMCL1;TRP53RKA;PRRC1;RDH11;TSPAN5;TSPAN3;N4BP2;S100A10;EGR1;NDFIP2;NDFIP1;CRADD;H…
Genes Up-Regulated In Expression In HD60i.4 NSCs From HD Patient Vs NSCs From Healthy Controls GSE37517	323/1852	3.01e-06	1.11e-05	0	0	1.35483	17.2233	SLC46A3;SPARC;HDAC11;SCX;ADARB1;ACCS;ZDHHC1;FRAT1;ADGRA1;AKT2;DAG1;BTRC;HES6;IAH1;MUSK;ACTN2;VWA5B2;SYTL5;DKK2;MTURN;GAREM1;FNDC4;DAAM2;MAP1A;ACOT2;ACOT1;FAR2;KCTD12;TLN2;1700016K19RIK;ACOT5;ACOT3;NECAB3;TMTC1;TAPBPL;NYAP2;PPL;ADAMTS10;PKHD1;COMMD9;FLRT2;STC2;CHST15;KCNN3;SCN3B;ST3GAL2;ZBTB7C;JAG2;STAT5A;ABCA1;EGR1;MYH7B;SRPK3;WNT10A;ARPP21;MTERF2;FAM78A;PLK2;PARVA;NR1D1;L1CAM;CYLD;RNF103;ZFP512B…
Up-regulated Genes In Striatum Of 6 Mon HD Q140 Mice Vs Q20 GSE78274	198/1055	3.09e-06	1.13e-05	0	0	1.4701	18.6516	ACCS;DCAF5;PTPDC1;SAMD14;DPYSL4;OGFOD1;WDR91;TRIM26;PDK1;UNC13B;HES6;SLC6A15;ZFP618;VWA5B2;SPIN2C;ZFP7;SKAP2;IGSF3;PCDH10;MAGED1;ABCB4;PCDH15;TMTC1;PRRC1;HLCS;VPS8;N4BP2;SLC19A1;EXPH5;ABCA1;GM10471;SMIM10L2A;LRRN3;EDEM1;PCDH20;SETD1B;POU6F2;EIF2AK4;CDAN1;NCEH1;FAT1;PCDHB5;CDS2;ACHE;PHF2;GPAA1;TGFB1I1;KRT20;LETM2;PANX2;SLC22A15;TCTN3;SPEER4A;NELFB;GPRASP2;CC2D2A;STUM;SREBF1;WARS;IFNGR2;TCF12;TSC22…
Genes Changed In HD Neurons Treated With ZFP-C Vs Control GSE127821	355/2062	3.2e-06	1.17e-05	0	0	1.33612	16.9068	TRIR;SLC46A1;LPGAT1;TLNRD1;PNMAL1;RAPH1;UBE2L6;MTFR1L;ZFP606;DCAF5;FNBP1L;ELK1;GPATCH8;HS6ST2;NUDT4;GLE1;PCMT1;GOLGA4;AKT2;CHORDC1;ARL6IP4;CCNL1;EPHB2;KIFAP3;IER5;FBXO9;ANKS1B;ARL10;MEF2A;ATP6V1G2;STARD7;ACTN1;DDX11;PHKA1;CSNK1D;ZFP618;CMBL;TMEM170B;THAP1;BCR;PLPP6;CRISPLD1;DAAM1;AKAP9;XRN2;ORAI2;FAR1;RABL2;ASTN2;1700016K19RIK;CCDC82;ADCYAP1R1;SAR1A;EPB41;PNP2;SDC3;NEDD4L;IQGAP2;HIF1A;OSGEP;GMCL1…
Genes Changed In Cerebellum Of 18 Week Old WT Mice Vs Atxn 1 154Q/2Q Mice Both Treated With Vehicle GSE114674	39/134	3.25e-06	1.19e-05	0	0	2.57466	32.539	HDAC4;RIPOR2;PFKFB3;SHC3;AKAP7;SNX30;STK3;FAM117A;RBM3;FGD4;RIMS3;RESP18;DYM;NEFL;NEFM;SLC25A25;MEF2A;USP48;GPX1;INSR;CTPS2;LIFR;INO80;KCNAB2;GPCPD1;TUBB4B;MAPK12;GPR137C;CYLD;SLC6A6;RAB30;FRMD6;TUBB2A;NEMF;DAAM2;CRELD1;NAT8L;SCN4B;PTPN5
Genes Up-Regulated In Sst/Npy-expressing Interneurons Of R6/2 Vs WT PMID32681824	75/323	3.36e-06	1.23e-05	0	0	1.90482	24.0074	RBM28;SNAP25;CCNT2;THRB;TUSC3;SLC35F4;PCDH11X;GRIK1;CHD2;GPATCH8;GPI1;RPS6KA3;CNTNAP5B;CHORDC1;KIRREL3;USP47;EPHA6;PPP1R12A;SHISA9;RAB30;DNAJC1;NCOR1;RALGAPB;AKAP9;KCNMA1;SIK3;CDH12;CDH18;GRAMD1B;FOCAD;ANKRD12;PCDH15;ITPR1;ARHGAP18;ZFP804A;NOL4;PHF21A;ZFP804B;NKAIN2;ABR;BCLAF1;SNTG2;FLRT2;FAM184A;CDH20;MAN2A1;SNTG1;TRA2A;PAK3;BRINP3;CREBBP;RABGAP1L;MBD5;EGFEM1;AUTS2;NEBL;KIDINS220;LRBA;KCNB2;PCDH…
FOXP1 Regulated Genes In Human Neural Cells GSE62718	161/828	3.4e-06	1.24e-05	0	0	1.5317	19.2872	RAB3B;RIPOR2;COL16A1;DGKD;SERPINE2;TMEM200A;HR;OGDHL;BZW2;CXCL14;SLC4A4;HS6ST2;CLEC18A;RGS4;LAMP5;SOX3;DACH1;BASP1;KIFAP3;PHLDA1;PDK1;KIRREL3;MREG;ACTN2;PRKCB;STARD8;IGFBP3;HPCAL1;ISLR2;ACSL4;FOXP1;TIAM1;MYCL;PCP4;CRISPLD1;SLC9A9;SPATA13;KCNQ3;NPTXR;RIN1;CDKL1;OSBP2;DIPK1C;ADCYAP1R1;FBLIM1;PCDH10;PNP2;SLC1A1;PDGFB;PLD5;ARHGAP19;STC1;AK4;TMTC1;ACTR3B;HIF1A;ABR;GRK3;ARHGAP20;ASIC4;CDH20;EPB41L2;STC…
Genes Changed In Microglia Vs Macrophages PMID28671693	191/1013	3.42e-06	1.25e-05	0	0	1.47765	18.5979	TXN1;CPNE8;SPARC;HR;MSMO1;FNBP1L;METRNL;GLDN;CLEC18A;ZDBF2;RASSF3;LIPG;SLC16A6;GRB10;KIF21B;PTGFRN;PPFIA4;PHLDA1;SCN1B;ARL10;SEMA6C;ATP6V1G2;MREG;ACTN1;MAGI3;COL23A1;LMTK3;ZFP618;LMO7;EML5;ARMCX4;SLC9A5;GAREM1;DOK4;SLC9A7;RRAGD;ACOT2;ACOT1;TLN2;NPTXR;SQSTM1;ACOT5;KCTD15;ACOT3;CTTNBP2;ABCB4;INSIG1;PDGFB;GPR85;LTBP3;IQGAP2;ADAMTS10;ACAT2;TMEM25;STRIP2;ARHGAP20;PRKAR2B;EPB41L2;RHPN1;PIP5K1B;TNRC18;R…
Genes Up-Regulated In Microglia Of AD Model Mice PMID26001565	165/853	3.53e-06	1.28e-05	0	0	1.52224	19.1101	TXN1;SCARB1;TLNRD1;SERPINE2;PLXND1;TUSC1;RORA;UBE2L6;MSMO1;ADARB1;CXCL14;ETS2;IGF1R;KLRB1A;LAPTM4B;AKR7A5;RASSF3;AKT3;HABP4;SLC16A3;BORCS7;PHLDA1;PHLDA3;PDK1;KCNH2;CAST;STARD4;TLE2;PHYH;IAH1;ENTPD5;THNSL2;GCAT;DKK2;GPR162;PCP4;FNDC4;NEIL2;DOK4;DAAM1;MAPKAPK2;PKP2;ACOT1;KDELR2;TRIB3;RELL1;MXRA7;VCL;LRPAP1;FBLIM1;MAGED1;MGST3;SDC3;ZFP503;CREM;ACTR3B;HIF1A;SEC14L2;DHX32;PMVK;PGK1;SMYD2;TSPAN5;IGFBP6…
Genes Up-Regulated In Astrocytes Of zQ175DN Vs HdhQ20 PMID32681824	77/335	3.74e-06	1.36e-05	0	0	1.8801	23.4923	DPP10;CPNE8;PTPRS;SERPINE2;ATP8A1;NEXMIF;CLSTN1;PCDH11X;FAIM2;SLC4A4;ZDBF2;DOCK10;TRO;APMAP;DAG1;REV3L;FAM3C;ENPP5;STUM;DYNC2H1;RBFOX2;WDR37;SLC6A15;ZBTB37;NPY1R;ISLR2;SOX11;SYP;ATP1B1;CASD1;WDR35;EML4;TMX4;CANX;MTF2;PHIP;CD47;TNIK;LY6H;DDX5;PCDH10;KCNA1;SEMA3A;TMEM59L;PRICKLE2;OPRL1;MESD;PCSK1N;PRKAR2B;SNTG1;FAM120C;SLITRK1;TSPAN3;NCDN;PTCHD4;SCN3B;TAC1;ABCA1;LGI1;PRNP;TCAF1;TMEM30A;LRRN3;KIDINS…
Genes Down-Regulated In The Astrocytes Of zQ175 KI Mice Vs WT At 2 Month Old GSE124846	13/24	3.76e-06	1.36e-05	0	0	7.37801	92.1601	PRKCB;INSIG1;MSMO1;PPP2R2A;BCR;RGS4;PDE10A;SLK;ADORA2A;FRRS1L;SLMAP;PENK;RGS7BP
Genes Up-Regulated In Microglia Vs Monocytes PMID28671693	126/619	4.04e-06	1.46e-05	0	0	1.61715	20.0829	SLC46A1;FAM13A;TUSC1;MPI;GIMAP3;GIMAP5;GLDN;GIMAP8;LIPG;DZIP1L;AGFG2;SCN1B;PPFIA3;NUDT12;ARL10;SEMA6C;RBFOX2;MAGI3;ZFP3;LMTK3;LMO7;RPGRIP1L;GAREM1;NEIL2;TLN2;ASTN2;NPTXR;6430571L13RIK;INTU;CTTNBP2;ABCB4;PDGFB;GPR85;LTBP2;LTBP3;MRO;NDRG2;ADAMTS10;TMEM25;ARHGAP20;EPB41L2;LDHD;PLXNA1;USP51;BC055324;SRGAP1;PLXNA3;TBC1D16;JAG2;MYH7B;GGT7;TCAF1;ANKRD24;RASL10A;CCDC136;PTCH1;TMEM132A;SMARCA1;GPR137C;DLG…
NFOL Newly Formed Oligodendrocyte-Enriched Genes PMID30078729	672/4197	4.08e-06	1.48e-05	0	0	1.24464	15.4442	CYFIP2;TRIR;POP5;PID1;SERPINE2;RPL31;WIPF2;A430005L14RIK;RAPH1;DCAF8;WDR83;EMC10;GPATCH8;GCSH;NDST1;PCMT1;DPYSL4;PSMD5;AKT2;4921524J17RIK;DPYSL3;MPV17;ANKS1B;MBNL2;IAH1;9330159F19RIK;WSB2;PRKCB;STARD7;B630019K06RIK;SOX11;SCAMP1;RC3H2;DAAM1;MAP1A;FAR1;ATF6;UBA52;VPS28;RNF122;SF1;ATF4;NAA60;LRPAP1;MTMR3;SAR1A;ANAPC16;CTBP2;CTBP1;NEDD4L;WDR61;AGAP3;MRPL12;HIF1A;ANAPC11;ABR;HSPH1;RDH11;FLRT3;PRKAR2B;…
Down-regulated Soluble Proteins In Striatum Of 8 Wk R6/2 Mice PXD004973	162/837	4.18e-06	1.51e-05	0	0	1.52279	18.8595	DGKB;MPI;WIPF3;CLSTN1;PPP2R2A;ICAM5;SLC4A4;CDH8;TXN2;CEP128;SLC8A2;LAMP5;PPP1CC;DPYSL4;FAM162A;DPYSL3;OSBP;ARHGDIB;TOM1;DAG1;PTGFRN;ANKRD13A;LZTS3;EPHA4;RBFOX2;STARD7;ACTN1;FIBCD1;PPP1R16A;TPM1;BOLA1;CACNA2D2;KCTD1;SHISA7;PCP4;GPR165;CARHSP1;ARMC6;STIM2;RRAGD;PHIP;KCTD12;RELL2;NGEF;SF1;DGKH;NECAB2;IGSF8;SPTBN5;CTBP1;TMEM121B;SDC3;RASAL1;RASGRP2;ACTR3B;ACAT2;OSGEP;PCSK1N;BRINP1;HRH3;EPB41L1;PCBP4;…
Genes Changed In R6/1 Mice Treated With AAV2/1-Elk-1 Vs AAV2/1-control GSE139847	18/42	4.23e-06	1.53e-05	0	0	4.68716	57.9941	VAT1;ZCCHC12;TMEM255A;CPNE7;RASGRF2;SYNPO2;NPY2R;ECEL1;IRS4;NGB;SHISAL1;NR1D1;COCH;DLK1;BAIAP3;DBP;RESP18;HAP1
Down-regulated Proteins In Hippocampus Of 10 Mon HD Q175 Mice Vs Q20 PXD005538	15/31	4.27e-06	1.54e-05	0	0	5.85529	72.3963	SMAD3;PLEKHA2;PRKCB;ARHGEF17;TCF20;KCTD4;CAMKK1;DNAJB1;PPP1R1B;HOMER3;ANKRD63;ERC2;SCN4B;LZTS3;HSPA1A
Genes Down-Regulated In Striatal Expression In Vehicle Treated PDE10A KO Mice Vs WT Mice GSE40377	2022-11-18	4.39e-06	1.58e-05	0	0	9.80549	120.953	ZFP942;GASK1B;KCNS2;ZFP40;FST;RASGEF1C;TNNT2;CASKIN1;OTOF;CLSPN;SYT9
Genes Down-Regulated In Sodium Butyrate Treated STHdhQ111 Vs Control GSE129143	353/2056	4.42e-06	1.59e-05	0	0	1.33095	16.4095	PATJ;LPGAT1;IKZF5;NUDT4;GLE1;NDST1;RPS6KA3;NIPAL3;DAG1;DZIP1L;CCDC97;PTGFRN;SLC12A6;ARL10;DYNC2H1;MEF2A;STARD4;RBFOX2;NHLRC3;WSB2;ARL15;AP1B1;ACSL5;PHKA1;ADGRA3;TMEM170B;BCR;TIAM2;PLPP6;ADCY9;MAP1A;AKAP9;XRN2;ORAI2;RIN1;ATF6;PIF1;MTMR3;INTU;EPB41;FLII;PRDM15;TAPBPL;PRDM10;DEDD2;ABR;HSPH1;FLRT2;RDH11;EPB41L2;D5ERTD579E;TNRC18;SNX9;N4BP2;RAB11FIP3;RREB1;RAB11FIP5;SLC19A2;STAT5A;VAT1;CDK17;FZD1;CREB…
Genes Changed In Cerebellum Of ATXN1[82Q] Vs WT Mice GSE108255	116/561	4.51e-06	1.62e-05	0	0	1.64789	20.2845	DGKG;CEP126;COL16A1;KCNG4;GPR63;RNF19B;RORA;CNTNAP5B;BMPER;BASP1;FAM174B;PPP4R4;SLC16A6;HOMER3;AGFG2;ANKS1B;PPP1R16B;KCNH3;WSB2;ADPRHL1;IGFBP4;TPM2;HPCAL1;CMBL;SLC9A2;CACNB2;PLPP6;MYCL;PCP4;OLFM3;FAR2;KCTD12;MXRA7;NPTXR;NGEF;CCNO;PDE9A;DGKH;CEMIP;NECAB3;ITPR1;RASAL1;SLC1A6;RHOBTB2;CACNA1G;STRIP2;HRH3;RDH11;MAP3K20;SCN3B;LHPP;WNT4;PCDH20;HTR1B;NSG1;GNAO1;SDK1;CPEB1;MEX3A;DLG2;DCHS1;CNTN3;FGF11;TUB…
Liver RNA M28 Module (Skyblue) PMID26900923	95/439	4.7e-06	1.68e-05	0	0	1.74253	21.3788	RIPOR3;GPSM1;COL16A1;SPARC;PTPRS;TENM4;COL14A1;TGFB1I1;CLSTN1;MCUB;LAMC1;ZDHHC1;AFF3;SOBP;RERG;IGF1R;MMP23;ADAMTS2;ENC1;TIMP2;DZIP1L;ITGB8;PMEPA1;DACT3;PTGFRN;PHLDA3;SEMA6C;LYNX1;IGFBP3;DENND2A;EPDR1;RHOB;CACNB3;SELENOM;FRMD6;ADORA2A;DAAM2;ANGPTL6;CDC42EP3;RRAGD;MXRA7;ASTN2;RNF122;TNFRSF21;BEX3;ZFP423;ADCYAP1R1;SLC24A3;SEMA3D;SRC;PAPLN;PDGFB;ADCY2;KLHL13;LTBP3;NTN1;ADAMTS10;ARVCF;GRK3;GPR153;ABLI…
Genes Down-Regulated In Cerebellum Atxn1[82Q]CaLoxM120A Mice Compared To Atxn1[82Q] KI Mice GSE114815	328/1894	4.73e-06	1.69e-05	0	0	1.34287	16.4648	PATJ;TLNRD1;RPL31;TMEM200A;TONSL;ADARB1;ADARB2;FNBP1L;GBA2;GPATCH8;AI593442;OGFOD1;DPYSL3;RAVER2;STMN1;ARL6IP4;PTGFRN;PKNOX1;CCNL1;UNC13B;MED1;IAH1;9330159F19RIK;ENTPD5;PHKA1;VWA5B2;RC3H2;EML5;GPR162;FNDC4;DAAM2;FAR1;TLN2;CCDC82;UBA52;TRIM11;VPS28;SKAP2;NECAB2;MEAF6;EPHA10;INTU;TARSL2;MGST3;ZBTB1;ENDOD1;C9ORF72;GMCL1;HSPH1;RIC8B;RDH11;PCBP4;LDHD;KCNN2;1500009C09RIK;SCN3A;RREB1;RAB11FIP4;RAB11FIP5…
Genes Down-Regulated In Human HD Cingulate Cortex Vs Control PMID32070434	106/503	4.8e-06	1.72e-05	0	0	1.68637	20.6512	RAB3B;CPNE8;TMEM200A;GPR68;NPY2R;CDH8;RGS4;LSM11;DACH1;AI593442;CNTNAP5B;TGM3;FBXO9;CHRNB2;LMO1;MLIP;SLC30A3;KRT2;KRT1;ISLR2;FNDC9;GPRIN2;RBP4;PCP4;OLFM3;SPIN2C;RELL2;DGKI;KLHL14;NXPH4;HPCA;NYAP2;SLC1A6;KCNV1;ARHGAP20;ADAMTS19;ZBBX;SMYD2;TAC1;WNT1;WNT4;GGT7;SLC4A10;NETO2;TDRD5;TMEM196;DCLK1;RPE65;GALNTL6;CALM1;SNAP25;ZCCHC12;CNTNAP1;SOWAHB;PTPRQ;ABCC12;ADAMTS3;ERC2;QRFPR;OXGR1;PRMT8;SLC39A10;SYP;…
Mouse Forebrain Cholinergic Neuron Markers PMID19013282	212/1150	4.87e-06	1.74e-05	0	0	1.43883	17.6006	POP5;CPNE8;CMAS;SERPINE2;TMEM200A;GDE1;WDR83;MTFR1L;ACCS;NUBP1;PCMT1;ARL6IP4;FBXO9;HES6;IAH1;ENTPD5;CMC2;SLC6A15;HPCAL1;B630019K06RIK;EBF4;GCAT;MTURN;FAR1;MXRA7;PLBD2;MEAF6;SAR1A;CTBP2;LYPD1;ENDOD1;ADAMTS10;CRHR1;ANAPC11;PGS1;COMMD9;PRRC1;RACGAP1;PIP5K1A;GSG1L;PIP5K1B;S100A10;TRPM4;JAG2;SMIM10L2A;EDEM1;SQLE;KLHDC8A;FXYD2;UNC119;CALM3;GALNTL6;CALM1;NOL12;CDS2;ACHE;CDKN1A;GPAA1;PHF1;MCUB;SLC7A14;MR…
Cortex RNA M24 Module (Darkgrey) PMID26900923	75/327	5.4e-06	1.92e-05	0	0	1.87414	22.7309	ZCCHC12;PATJ;SPARC;GALNT13;ONECUT2;NPY2R;PCDH11X;IRS4;GRIK1;DOC2B;HS6ST2;RXFP3;DOCK10;RESP18;SIX3;GRB10;TUNAR;WDR6;SCN5A;STK32A;GPRASP2;PGM1;SLC18A3;ARL10;GHSR;GAA;KCNH8;NGB;CACNA2D2;B630019K06RIK;GFRA1;TRAF1;FNDC9;TMEM130;MTSS1;GPR165;MYO3B;SPATA13;HAP1;SLC27A2;CNGB1;ITIH3;ZFP423;PLPPR1;ZFP503;PLD5;KLHL13;NTS;LBHD2;STK33;INPP5F;GRK5;SLITRK6;SLC17A8;SRGAP1;VAT1;KCNIP1;MAGEE2;ECEL1;KLHL1;RAB27A;LH…
CAG Length-Dependent Genes In iSPNs Of HD Mice Up PMID32681824	248/1381	5.69e-06	2.02e-05	0	0	1.39644	16.8648	CPNE8;FAAH;SPARC;NEXMIF;RAPH1;DCAF5;NUDT4;ZDBF2;GCSH;DPYSL4;ADGRA1;DPYSL3;NDST3;KIF21B;KIFAP3;DYNC2H1;HES6;RSAD1;CIRBP;ISLR2;PHKA1;SOX11;ACSL4;SLC6A11;YOD1;ZFP618;TMEM170B;DAAM1;DAAM2;IGSF3;PCDH10;ENDOD1;NYAP2;NKAIN2;STRIP1;PIP5K1B;TNRC18;CFAP65;N4BP2;ABCA1;LRRN3;H3F3B;TIPARP;EDEM1;PCDH20;THAP12;PARP16;PARVA;HSPA12A;NET1;UCK2;CPEB1;MEX3A;RNF103;ARL2BP;ADI1;KLHDC8A;FAT1;FNDC10;CREBRF;CPEB2;ZFP871;…
Neuro2a Htt72Q-ni Vs Htt72Q-i PMID28743452	164/854	5.83e-06	2.07e-05	0	0	1.50787	18.173	SCARB1;COL16A1;SPARC;ZFAND5;TONSL;MSMO1;STMN4;FAIM2;JADE2;DOCK10;RGS3;DPYSL3;DAG1;EP300;LGALS8;PPFIA3;AGFG2;PRKCI;CHRNB4;LIMCH1;IGFBP4;TLE6;FOXP1;ADAM19;ACAP2;PCP4;CARHSP1;GAREM1;DAAM1;RRAGD;ACOT2;MXRA7;TNIK;RIN1;ATF6;SQSTM1;ATF3;DGKI;ZFP330;SPTBN4;BRSK2;CBFB;IGSF3;GLO1;GPR85;ARHGAP19;ARHGAP18;IQGAP2;KLC1;FAM149A;CRHR1;SLC9A1;RHOBTB2;ISOC1;PLXNA1;TNRC18;IGFBP6;CLSPN;ST3GAL2;PLXNA4;SLC15A5;VTI1B;K…
Genes Changed In HDACi 4B Treated Vs Untreated Friedreich Ataxia Patient Blood Cells GSE30933	263/1478	5.99e-06	2.12e-05	0	0	1.38214	16.6213	CYFIP2;CPNE8;SPON1;PATJ;FAAH;SPARC;SERPINE2;TMEM200A;XYLT2;SPINT2;ICAM5;ADARB1;ACCS;RPS6KA4;SAMD14;NIPAL3;HABP4;IER5;ARL15;FBXO2;AP1B1;FRS3;MFSD12;MTURN;ARMC6;SUB1;VDAC2;ASPHD2;KDELR2;TRIB3;MXRA7;SLBP;GCDH;BEX3;PNP2;MAGED1;6430548M08RIK;MRPL12;HSPH1;TSPAN3;RAB11FIP5;TRPM4;JAG2;EGR1;NDFIP2;WNT10A;CADM1;JUP;BCL11B;GTF2IRD2;CDC7;ELL2;WDR54;SLC6A6;CALY;ARL2BP;ADI1;FXYD2;CYP2S1;SFXN4;PEMT;PAM;ITM2C;CE…
COP Committed Oligodendrocyte Precursor Cell-Enriched Genes PMID30078729	513/3128	6.01e-06	2.13e-05	0	0	1.26967	15.2636	CYFIP2;PID1;SERPINE2;RPL31;RAPH1;DCAF8;EMC10;GPATCH8;GCSH;PCMT1;DPYSL4;DPYSL3;STMN1;PWWP2A;MPV17;ANKS1B;MBNL2;PRKCB;STARD7;SOX11;SCAMP1;RC3H2;MAP1A;FAR1;ATF6;UBA52;VPS28;RNF122;SF1;ATF4;LRPAP1;SAR1A;ANAPC16;CTBP1;WDR61;MRPL12;HIF1A;ANAPC11;ABR;HSPH1;FLRT3;PRKAR2B;D5ERTD579E;1110051M20RIK;S100A13;AMZ1;VTI1B;CREBBP;PRPF38B;NDFIP2;ACD;NDFIP1;ARPP21;CADM1;TIPARP;NCAPH2;TMEM199;HNRNPM;SQLE;SLC6A6;GLUD…
Parkinson Disease Markers In Human Substantia Nigra GSE26927	393/2327	6.14e-06	2.17e-05	0	0	1.30699	15.6841	CYFIP2;PID1;NEXMIF;COMTD1;CNST;LSM11;AKT2;PPP4R4;4921524J17RIK;HOMER3;STARD4;RBFOX2;STARD8;CACNA2D2;SOX11;SCAMP1;GPR162;DAAM1;RFX4;ASTN2;SF1;NAA60;ANAPC16;CTBP2;FLII;LYPD1;PDGFB;NEDD4L;FAM171A1;RHOT2;FAM124A;PCDHA1;EPB41L2;SYNDIG1;GSG1L;PIP5K1B;ST3GAL2;LHPP;B3GALNT2;MYH7B;CREBBP;NDFIP1;JUP;DNAH17;H3F3B;INO80;PKIB;HNRNPM;CPEB2;ACHE;PHF2;GPR26;TGFB1I1;ARHGAP1;CLTB;LRRC1;TRIM9;ZCWPW1;FAM102B;SMPD1;N…
Genes Up-Regulated In Cerebellum Of 12 Week Old ATXN1[82Q] Vs WT GSE122099	105/500	6.25e-06	2.21e-05	0	0	1.67849	20.1137	PID1;COL16A1;SERPINE2;WWC1;IRS4;FNBP1L;CXCL14;ZDBF2;DPYSL3;GRB10;STK32A;PHLDA3;KIRREL2;MAGI3;FBXO2;ACSL5;B630019K06RIK;ADGRA3;LIFR;TMEM130;POU3F3;CARHSP1;SPATA13;KCNQ3;MXRA7;LY6H;NGEF;VCL;CEMIP;ADCYAP1R1;D630045J12RIK;PCDH10;NXPH4;ENDOD1;ILDR2;IQGAP2;PLCXD1;CACNA1E;NKAIN2;EPB41L2;ZMAT4;MAP3K20;ISOC1;KCNN2;ABCA1;CADM1;NEBL;SHISAL1;B3GALT5;6330403K07RIK;ZWINT;GPR137C;SDK1;MEX3A;DCHS1;CPEB2;PAM;FGFR…
Differentially Expressed Genes In HD Vs Control Brain Endothelial Cells GSE97100	46/173	6.8e-06	2.4e-05	0	0	2.27318	27.0469	DPP10;BEX3;BEX2;HPGD;TMEM200A;RGS16;SYNPO2;NEXN;KLHL13;CXCL14;HS6ST2;PTPRF;RHOBTB2;WDR44;AKAP12;RPS6KA3;EFNB1;EPB41L4B;DACH1;DBP;RAB40B;TCEAL3;TMSB4X;ENC1;TCEAL1;GCNT2;ADAMTS6;SLC18A3;TCEAL9;OFD1;IGFBP4;PCDH7;FAM199X;SMARCA1;DCBLD1;PTPRD;SLC9A7;GPRIN1;MORF4L2;STK26;FAM131B;KIF26B;KCNMA1;MSRB3;TLN2;ST6GALNAC3
Mouse Cerebellum Purkinje Cell Markers PMID19013282	408/2429	6.84e-06	2.41e-05	0	0	1.29928	15.4513	TLNRD1;WDR83;STMN4;ACCS;DCAF4;GLE1;AI593442;PPP4R4;HOMER3;ANKS1B;RBFOX2;IAH1;9330159F19RIK;WSB2;GTPBP3;ZC2HC1C;ORAI3;ORAI2;SPIN2C;FAR2;PLBD2;ATF4;NAA60;ANAPC16;MEAF6;AGAP3;ANAPC11;ABR;PCDHA1;RDH11;PRKAR2B;EPB41L2;1110051M20RIK;LDHD;SYNDIG1;PIP5K1B;AMZ1;LHPP;VTI1B;S100A10;B3GALNT2;NDFIP2;GPR12;LRBA;ELL2;NR2F6;CPEB1;UCK1;GM2832;GIPC2;PSMG4;CDK13;PRRT4;DMRTC1A;HRK;PIGS;ZFP367;PHF1;MEI4;ARHGAP1;TRIM9…
Genes Changed In HD Vs Control Fibroblast-Derived Neurons GSE84013	168/881	6.86e-06	2.41e-05	0	0	1.49503	17.7766	RAB3C;RIPOR2;GALNT13;DGKB;PCDH11X;NPY2R;IRS4;GLDN;RXFP3;HS6ST3;KLRB1A;DACH1;CNTNAP5B;AI593442;LIPG;NDST3;ARHGDIB;CHRNB2;GUCY1A2;MLIP;EPHA6;SKIDA1;ANKRD45;ZFP619;KCTD4;SHISA9;UPB1;SFRP4;CACNB2;DISP3;OLFM3;HECW2;KCTD12;NPTXR;ATF3;PDE9A;SHC3;CTTNBP2;INSIG1;HPCA;LYPD1;PDGFB;TMTC1;KLHL13;AK5;NYAP2;NTS;ACAT2;CACNA1G;KCNV1;BRINP2;FUT8;PCSK1N;C7;ADAMTS19;CDH20;KCNN2;1500009C09RIK;N4BP3;SCN3A;SRGAP1;SLC15…
Genes Up-Regulated In Influence Of Hdac4 Reduction On Expression In 9 Wk R6/2 HD Mice GSE38218	92/426	7.19e-06	2.52e-05	0	0	1.73711	20.5727	RIPOR2;DIRAS1;CLSTN1;HDAC11;HMGB3;RORA;ZCCHC17;FBXO22;TXN2;C1QTNF4;RPS16;CRTAC1;HABP4;COTL1;CHP1;PGLS;ENPP5;BOK;PDK1;KCNH3;PRKCI;AGTPBP1;ATP6V1G2;WARS;MIGA2;WSB2;ACTL6B;CHPF2;STARD8;ARHGEF17;PPP1R16A;ZFP811;EPDR1;THOC3;CSNK1D;GPCPD1;LEMD1;BCR;MED22;CTU2;CCKBR;CCNE1;PEAK1;ADGRF4;SLCO2A1;RRAGD;ARHGEF4;ASPHD2;RHOV;RELL2;SLC29A1;NAT8L;SQSTM1;SSX2IP;RBM24;GAS7;NAPA;MGST3;HPCA;ARL2;KLC1;LIAS;SMIM7;SRM;…
Genes Changed In iSPNs Of 3 Mon HdhQ170 Vs HdhQ20 PMID32681824	34/114	7.54e-06	2.64e-05	0	0	2.66289	31.4091	DPP10;ZFP105;CHRM1;ANKRD35;EPB41;CELF1;TMEM121B;NEDD4L;WNT8B;TCF20;HAPLN4;HS6ST3;BRINP1;TCTN2;DPYSL3;CHN1;GGACT;CKB;SAMD1;ANKS1B;ZBTB18;KCNH3;RBM15;PLK2;YLPM1;DDIT4L;PPP2R5D;BAIAP2;KRT9;SRPK1;GNAO1;CACNB2;SYT10;EIF4G1
Genes Up-Regulated In Expression In Quadriceps Muscle Of HSALR 20B Myotonic Dystrophy Mice GSE38962	136/687	7.68e-06	2.69e-05	0	0	1.56225	18.399	SLC23A3;SLC46A3;FBXO27;HR;GLDN;RPS6KA3;SYNPR;SLC16A6;HABP4;CPNE2;BTRC;PHLDA3;UNC13B;KCNH2;TLE4;RBFOX2;MREG;PAQR7;WSB2;MUSK;ACTN2;PUS1;CIRBP;KRT77;LIFR;CMBL;GCAT;TIAM2;DOK5;DENND6B;FAM8A1;ATF3;SLBP;MTMR3;CHIA1;KLHL15;ABCB4;SLC1A1;TMTC1;SNN;PRRC1;ZFP52;5730409E04RIK;INPP5F;MAN2A2;RAB6A;SCN3B;TBC1D16;FZD1;COA4;ARPP21;TGFB3;SEC16A;TMEM132A;SMAD9;KLHL23;INO80;HSPA2;SYT9;COPRS;PTPRD;CCDC88B;PTPRE;DIAPH…
Genes Up-Regulated In Friedreich Ataxia iPSCs Expression Vs MR90C2P28 Cell Line GSE22651	386/2286	7.68e-06	2.69e-05	0	0	1.30575	15.3769	WIPF3;SAMD14;PPP4R4;WDR91;IER5;IAH1;NHLRC3;COL23A1;CACNA2D2;MRTFA;SOX11;BCR;GPR162;ORAI3;RABL2;PLBD2;VPS28;PIF1;MTMR3;PDGFB;FIGNL2;AGAP3;PRDM10;FAM171A1;RHOT2;FAM124A;FLRT3;1110051M20RIK;LDHD;S100A10;JAG2;ACD;JUP;NEBL;LRBA;WDR54;ARL2BP;SFXN4;EZH2;ARHGAP1;MED16;SHB;C1QTNF4;JPH4;TRIM9;TCTN3;TMSB4X;NEFL;GPR137;NELFB;SH3BGRL3;WDR37;METRN;ITPKB;SLC7A8;ADSSL1;TUT1;L2HGDH;HAP1;ERGIC3;LRRC3B;SLC29A1;PLPP…
Genes Down-Regulated In Friedreich Ataxia iPSCs Expression Vs HDF Cell Line GSE22651	675/4237	7.72e-06	2.69e-05	0	0	1.23564	14.5457	CYFIP2;POP5;PATJ;PNMAL1;WIPF3;WDR83;SPINT2;FNBP1L;GCSH;COMTD1;DPYSL4;PPP4R4;4921524J17RIK;DPYSL3;LIPG;STMN1;PWWP2A;ZFP286;ANKS1B;UNC13B;RNF138RT1;HES6;MED1;PRKCI;PRKCB;STARD7;DDX11;COL23A1;CACNA2D2;GTPBP3;BCR;EML4;ZC2HC1C;ARMC6;RBP1;ASPHD2;FAR2;ASTN2;UBA52;NGEF;SF1;PIF1;ZBTB8A;CTBP2;PNP2;LYPD1;FIGNL2;IQGAP2;MRPL12;C9ORF72;DEDD2;RHOT2;FAM124A;RIC8B;PCDHA1;TERT;ADAMTS19;LDHD;SYNDIG1;RRS1;CHST15;PIP…
pnVLMC Post-Natal Vascular And Leptomeningeal Cell-Enriched Genes PMID30078729	620/3861	7.79e-06	2.72e-05	0	0	1.24402	14.6326	CYFIP2;TRIR;PID1;SERPINE2;RPL31;WIPF2;RAPH1;DCAF8;WDR83;DCAF5;ALKBH6;DCAF4;GPATCH8;ZDBF2;SAMD14;DPYSL4;AKT2;DPYSL3;STMN1;MPV17;IER5;ANKS1B;MBNL2;RBFOX2;9330159F19RIK;PRKCB;COL23A1;CACNA2D2;SOX11;SCAMP1;RC3H2;DAAM1;MAP1A;RABL2;ATF6;UBA52;VPS28;RNF122;SF1;ATF4;SLBP;LRPAP1;SAR1A;ANAPC16;CTBP2;MEAF6;CTBP1;FLII;NEDD4L;WDR61;SLC30A10;MRPL12;HIF1A;ADAMTS10;ANAPC11;ABR;HSPH1;FLRT2;FLRT3;PRKAR2B;S100A13;S…
Expression In Caudate Nucleus Of 18 Mon HdhQ150 HD Mice GSE32417	2022-09-13	7.83e-06	2.73e-05	0	0	14.032	164.983	RYR1;PDE10A;ADORA2A;SEMA3D;GPX6;PENK;SLC4A11;GPR6;SCN4B
Genes Down-Regulated In Trichostatin A Treated STHdhQ111 Vs Control GSE129143	116/568	8.25e-06	2.87e-05	0	0	1.6217	18.9834	PATJ;IRS1;WIPF2;JADE2;2900026A02RIK;NUDT4;NDST1;MAEA;AKT2;GRB10;HOMER3;CLBA1;SOX9;RBFOX2;PPTC7;LIMCH1;ACTN1;NRBP1;BCR;TIAM2;FRMD6;HNRNPUL2;ORAI2;SIK3;VCL;KANK3;IPPK;DDX6;ISYNA1;FLII;ARHGEF28;ZBTB1;SEC14L1;EPB41L2;D5ERTD579E;TSPAN5;SNX9;TNRC18;ZBTB7A;RAB11FIP3;ST3GAL2;RAB11FIP5;FZD1;STAT5A;ZFP236;KIRREL;SMAD3;GADD45B;TGFB3;SETD1B;SEC16A;PTCH1;CRIM1;PARVA;SSH1;MEX3A;LRCH1;SFXN3;EIF4G1;GPSM2;CDKN1A;…
Genes Up-Regulated In Friedreich Ataxia iPSCs Expression Vs Miz4 Stem Cell Line GSE22651	540/3320	8.54e-06	2.97e-05	0	0	1.25802	14.6818	PATJ;TLNRD1;WIPF3;RAPH1;NDST1;ZFYVE27;WDR91;9330159F19RIK;MRTFA;WDR73;BCR;DAAM1;ARMC6;MAP1A;FAR1;ASPHD2;RABL2;PLBD2;VPS28;SF1;PIF1;MTMR3;CTBP1;PNP2;FLII;NEDD4L;MRPL12;PRDM10;FAM149A;RHOT2;FAM124A;HLCS;EPB41L1;RRS1;PIP5K1B;SLC19A1;EXPH5;ZBTB7C;S100A10;JAG2;CREBBP;ACD;JUP;SETD1B;LRBA;NETO2;WDR54;SQLE;UCK2;SFXN4;CDK13;CPEB2;PIGS;PHF2;SETD2;ARHGAP1;CLTB;SHB;MED16;JPH4;DSTYK;MED13;TMSB4X;TIMP2;GPR137;…
Genes Changed In HDACi 106 Treated Vs Untreated Healthy Donor Blood Cells GSE30933	569/3519	9.29e-06	3.22e-05	0	0	1.25075	14.492	CYFIP2;PATJ;PID1;SERPINE2;RAPH1;ADARB1;FNBP1L;DCAF4;PCMT1;COMTD1;SAMD14;CNST;DPYSL4;PPP4R4;4921524J17RIK;DPYSL3;STMN1;HOMER3;MPV17;PKNOX1;IER5;ZFP286;HES6;RBFOX2;WSB2;NHLRC3;PRKCB;STARD8;COL23A1;MRTFA;GTPBP3;EML4;ARMC6;HECW2;RBP1;RNF122;SF1;LRPAP1;ANAPC16;PNP2;FLII;NEDD4L;WDR61;TAPBPL;MRPL12;HIF1A;RHOT2;HSPH1;RIC8B;RRS1;SLC19A1;JAG2;NDFIP2;NDFIP1;JUP;CADM1;H3F3B;TIPARP;GTF2IRD2;CDC7;INO80;ELL2;WD…
Genes Up-Regulated In Corpus Callosum Of BACHD Vs WT Mice PMID31015293	18/44	9.34e-06	3.23e-05	0	0	4.32611	50.1006	SPEN;TMEM151B;ARHGEF17;CLSTN1;IQSEC3;KCNAB2;BAIAP2;HK1;TIAM1;ADGRB2;SNPH;PITPNM3;ADGRL1;ARHGEF4;TBKBP1;NAT8L;FGFR3;SHANK1
PC12 Htt-Q74 Vs PC12 Htt-Q23 Upon 72 H Of Induction PMID28499347	147/757	9.7e-06	3.35e-05	0	0	1.52626	17.6176	KCNG2;RAB3C;SH3GL3;PATJ;ANKRD13D;SPARC;PLXND1;SCX;UBE2L6;SPINT2;ZDHHC1;ELK1;CXCL14;RGS4;SESN3;FAM162A;AKT3;HABP4;MPV17;SLC16A3;AGFG2;TGM3;FBXO9;MCCC2;IL15RA;STARD4;CHRNB4;IAH1;ACTN1;EPDR1;THNSL2;MFSD12;EML5;RBP4;PCP4;ARMCX6;ACOT2;ACOT1;ACOT5;SQSTM1;ACOT4;PLBD2;ACOT3;CDKL1;DGKH;LRPAP1;ISYNA1;TMEM63C;SLC35D3;ARHGEF28;NXPH4;TAPBPL;TMEM121;GOLGA7B;FAM171A1;WNT6;STK33;ASIC4;GRK5;HRH3;FLRT3;STC2;INPP5J…
Top Astrocyte-Enriched Genes In Humans And Mice PMID29892006	195/1055	9.97e-06	3.44e-05	0	0	1.44083	16.5929	SPON1;SERPINE2;SLC4A4;AKT2;RAVER2;DAG1;DZIP1L;SOX9;AGFG2;DYNC2H1;PAQR7;LIMCH1;FBXO2;PHKA1;SLC6A11;CMBL;FNDC4;DAAM2;RFX4;RBP1;NGEF;KCTD15;ADCYAP1R1;INTU;PCDH10;SLC30A10;SEC14L2;FAM171A1;STRIP2;LDHD;KCNN2;KCNN3;NTSR2;ABCA1;BBS2;FZD1;CADM1;NEBL;GREB1;NR2F1;DDIT4L;PARVA;NR1D1;DCLK1;RPE65;GLUD1;PPP1R1B;CCDC88C;FAT1;KYAT3;CYSTM1;GSTM6;ITM2C;PIGS;PTPRF;RYR3;TMEM47;TRIM9;HEY1;TMEM44;CC2D2A;SREBF1;PARP3;K…
Caudal Serotonergic Neuron-Enriched Genes PMID20071532	59/245	1.13e-05	3.88e-05	0	0	1.9934	22.7128	DPP10;SNAP25;SPON1;DOCK4;ANKRD13D;ATP8A1;PTPRO;IRS4;PPP1R9A;AKAP12;TRO;FAM174B;REV3L;SACS;BTRC;UNC13B;TSC22D1;SGIP1;PHKA1;ANO4;SHISA9;ADAM19;RFX4;FAR1;CD47;SRSF7;NFAT5;FBLIM1;NTM;ZFP503;ZDHHC22;ZBTB4;HDAC9;NTN1;CACNA1G;ABLIM1;PRR14L;CCDC85A;FAM241A;BNIP2;SLC36A4;KLHDC10;WNT4;ZFP711;TUB;PLEKHA2;SLC4A10;TDRD7;SEMA4F;PNMA2;HSPA12A;L1CAM;DLK1;TTLL7;TRMT9B;NELL1;ETNK1;MGAT4A;PAXBP1
Regulation Of Intrinsic Membrane Properties And Excitability Of Striatonigral Medium Spiny Neurons In HD CHDI116	22/61	1.13e-05	3.89e-05	0	0	3.52744	40.1812	GUCY1A2;PRKCI;CHRM1;KCND2;PRKCB;ITPR1;PPP1CA;PPP1CB;PPP1CC;PDE10A;PRKAR2B;KCNMA1;PPP1R1B;KCNQ3;HOMER3;CALM3;DRD1;KCNN3;CALM1;SHANK3;PDE9A;SHANK1
Genes Up-Regulated In Friedreich Ataxia iPSCs Expression Vs ES4CL2 Cell Line GSE22651	377/2236	1.15e-05	3.94e-05	0	0	1.302	14.8122	FAAH;SPARC;SERPINE2;WIPF3;GDE1;SPINT2;ACCS;HS6ST2;CYB5D2;RPS6KA4;SYNPR;SOX3;SAMD14;RPS6KA2;OGFOD1;ZXDB;DPYSL3;ARL6IP4;PTGFRN;SOX9;KIFAP3;IER5;ANKS1B;EPHA4;PAQR7;NHLRC3;COL23A1;AP1B1;HPCAL1;ZFP619;SOX11;ZFP618;CMBL;FRS3;BCR;PLPP6;SNORC;FNDC4;TRIM17;ORAI3;CSNK2B;RBP1;RRAGD;XRN2;ZFP7;FAR2;TLN2;MXRA7;ATP6V0D1;1700016K19RIK;PLBD2;VPS28;CCNO;ACOT4;SKAP2;MEAF6;INTU;MAGED1;PCDH10;PNP2;MGST3;LYPD1;PDGFB;F…
Expression In Quadriceps Muscle Of 3 Mon Mbnl1 KO Myotonic Dystrophy Mice GSE14691	223/1235	1.18e-05	4.07e-05	0	0	1.40248	15.9088	CCNK;SPON1;EMC10;DCAF5;CYB5D2;GPATCH8;ZDBF2;GCSH;PCMT1;RPS6KA3;PSMD5;STMN1;CPNE2;PRKCI;ACTN2;CMC2;TIAM1;ADCY9;MAP1A;TLN2;RNF122;ANAPC16;EPB41;TMTC1;ACTR3B;PRRC1;FLRT2;PCBP4;ST3GAL2;RAB11FIP5;RABGAP1L;ARPP21;H3F3B;GADD45B;FAM78A;EDEM1;DDIT4L;ELL2;DCLK1;CYLD;CPEB1;ADI1;FNDC10;UNC119;CALM3;GRB2;CALM1;CPEB2;PAM;PHF2;CDKN1A;HIP1;GBE1;MRPS12;IDE;LARP1B;SDF4;SREBF1;LYNX1;ATMIN;MMD;IFNGR2;STRBP;ACAD9;TSC…
Genes Up-Regulated In Expression In Cerebellum Of 6 Mon Ataxin-2 KO Spinocerebellar Ataxia 2 Mice GSE55177	59/246	1.28e-05	4.4e-05	0	0	1.98263	22.3292	RBM28;LPCAT1;RYR3;IGF1R;EPB41L4B;TMEM267;AGFG2;KIRREL3;COL27A1;ACTL6B;TSC22D1;SOX11;RAD23B;LEMD1;RNF41;FRMD6;MAP1A;PXDN;SIK3;DENND6B;RHOV;TNIK;RNF122;VWA7;CEMIP;NECAB3;TMEM63C;CTTNBP2;SRC;NEDD4L;NOL4;GOLGA7B;FGD4;ABLIM1;EPB41L1;CLPTM1;ISOC1;GSG1L;SLIT3;STX3;EXTL3;CLVS1;MYH7B;FKRP;KCNJ11;KCNIP2;LRBA;GREB1;SORBS1;SYT17;SDK1;NOL4L;SYNDIG1L;UBLCP1;CCDC88C;PI4KA;CALM3;CNTN4;SSBP2
Genes Changed In Corpus Callosum Of BACHD Vs WT Mice PMID31015293	20/53	1.29e-05	4.41e-05	0	0	3.78837	42.6559	ANKRD17;SPEN;TMEM151B;ARHGEF17;CLSTN1;IQSEC3;MSMO1;KCNAB2;BAIAP2;HK1;TIAM1;ADGRB2;SNPH;PITPNM3;ARHGEF4;ADGRL1;TBKBP1;NAT8L;FGFR3;SHANK1
Expression In Quadriceps Muscle Of HSALR 20B Myotonic Dystrophy Mice (MOE430A Array) GSE14691	220/1218	1.33e-05	4.55e-05	0	0	1.40258	15.7478	CCNK;SPARC;EMC10;GPATCH8;HS6ST2;NUDT4;PCMT1;RPS6KA3;GOLGA4;RASSF3;PSMD5;CPNE2;MEF2A;PRKCI;RBFOX2;WSB2;ACTN1;PHKA1;CMBL;TIAM2;TIAM1;ADCY9;SUB1;KCTD12;SF1;EPB41;PNP2;ABCB4;PDGFB;PGS1;PRRC1;PCBP4;EPB41L2;CHST15;ZBTB7A;ST3GAL2;RAB11FIP5;ABCA1;SRPK3;CREBBP;CADM1;ARPP21;H3F3B;GADD45B;EDEM1;DDIT4L;PARP16;INO80;ZWINT;NR2F6;CPEB1;ADI1;CREBRF;CALM3;GRB2;CALM1;ITM2C;CDKN1A;SLC35F5;MRPS12;CLTA;IDE;AKAP12;ADA…
Genes Down-Regulated In Friedreich Ataxia iPSCs Expression Vs Control Keratinocytes GSE22651	739/4696	1.37e-05	4.68e-05	0	0	1.21981	13.6597	CYFIP2;PNMAL1;WIPF3;RAPH1;WDR83;ADARB2;FNBP1L;GPATCH8;GLDN;GCSH;PCMT1;4921524J17RIK;RAVER2;DPYSL3;STMN1;PWWP2A;PKNOX1;ZFP286;ANKS1B;UNC13B;RNF138RT1;HES6;MED1;PRKCI;NHLRC3;PRKCB;STARD7;DDX11;FIBCD1;CACNA2D2;SOX11;GTPBP3;EML4;ZC2HC1C;GPR162;FAR2;RABL2;ASTN2;UBA52;NGEF;RNF122;ATF4;SLBP;PIF1;ZBTB8A;SAR1A;LYPD1;FIGNL2;IQGAP2;C9ORF72;HIF1A;FAM149A;DEDD2;FAM124A;RIC8B;TERT;EPB41L1;RDH11;ADAMTS19;EPB41L…
Mouse Cerebellum Golgi Cell Markers PMID19013282	179/960	1.37e-05	4.69e-05	0	0	1.45439	16.2815	TXN1;RAB3B;DGKD;WWC1;GMNN;1700001L19RIK;CIB2;WDR83;ZFP606;1110065P20RIK;IGF1R;AKR7A5;CCND2;DACH1;APMAP;BMPER;OGFOD1;AKT3;DPYSL3;RESP18;PDK1;RAB2A;KCNH3;SEMA6C;ACTN2;ARL15;TPM2;CMC2;EPDR1;TMEM252;LEMD1;TPST1;GPR162;ARMCX6;NHP2;SELENOV;KDELR2;MXRA7;LY6H;PLBD2;ISCU;CDKL1;KMT2D;PKDCC;MEAF6;IGSF3;CABP7;SLC35D3;HPCA;LYPD1;ENDOD1;BHLHE22;KLHL13;RASGRP2;KLC1;PLCXD1;TIMM50;ANAPC11;COMMD9;FAM124A;FLRT2;ZMA…
Genes Down-Regulated In Expression In HD60i.4 NSCs From HD Patient Vs NSCs From Healthy Controls GSE37517	379/2254	1.4e-05	4.75e-05	0	0	1.29747	14.5054	CYFIP2;PID1;WIPF3;GDE1;UBE2L6;GCSH;SYNPR;MSANTD1;PPP4R4;DPYSL3;LIPG;HABP4;LGALS8;EPHB2;ZFP286;DYNC2H1;UNC13B;MCCC2;RNF138RT1;STARD4;EPHA6;ARL15;ISLR2;PHKA1;SOX11;CMBL;SCAMP1;BCR;TIAM2;TIAM1;RFX4;SPATA13;SIK3;TRIB3;MAML3;ATF3;RNF122;KCTD16;NECAB2;BEX2;TMEM161A;INTU;EPB41;PNP2;ABCB4;MGST3;FIGNL2;IQGAP2;SLC30A10;ACTR3B;C9ORF72;CRHR1;GMCL1;NEU3;SEC14L1;FAM124A;DHX32;RACGAP1;PRKAR2B;D5ERTD579E;CFAP69;…
Hippocampal (Sst+), Cingulate (Pvalb+) And LGN Interneuron Gene Module PMID19638972	43/162	1.4e-05	4.76e-05	0	0	2.26635	25.3289	DDX5;RALB;GPR85;RASGRP2;CNDP2;NUDT4;LAMP5;LAPTM4B;COMTD1;SLK;COMMD9;NNT;ENC1;PTK2B;GUSB;WASF1;S100A10;KCNH2;SEMA6C;EGR1;DGAT1;ANKRD24;ARPP21;BCL11B;KCND2;TGFB3;FBXO2;CCDC136;ELOVL2;CRIM1;DAB2IP;SARS;TPD52L1;EHBP1L1;GPD1;G6PDX;FNDC10;SFXN4;CALM3;MAGED2;CALM1;SLC27A2;SPSB4
HD Grade 4 Markers In Human Caudate Nucleus (HG-U133B) GSE3790	140/720	1.47e-05	4.99e-05	0	0	1.52745	16.9979	CHRM1;WIPF3;ZBTB20;RORA;FAM228B;ZFYVE28;TMEM267;AKT3;RAVER2;ANKS1B;NUDT12;TLE4;CHRNB2;HES6;KCNH3;DGAT2;STARD7;RALGAPA2;ZBTB34;LIFR;THOC2;CMBL;SHISA9;SHISA7;FOXP1;TIAM2;FRMD6;OBSCN;GAREM1;DAAM1;RFX4;ASPHD2;DENND6B;DENND6A;KCTD15;SPTBN4;BRSK2;ADCYAP1R1;MTMR3;TMEM63C;UBA6;AK4;TMTC1;OMA1;LTBP3;CACNA1E;GMCL1;STK33;ARHGAP20;ZMAT3;CAMTA1;KDSR;RAB11FIP4;BCL11B;NEBL;RASL10B;SMAD9;FAM199X;EIF2AK4;NETO2;GPR…
Genes Up-Regulated In WT Mice Treated With AAV9-Eif2a-Nme1-EF2a-GFP Vs Control GSE141856	14/30	1.51e-05	5.14e-05	0	0	5.46296	60.6279	CREBZF;SAMD5;RIPOR2;MBD5;TENM4;YLPM1;STRN4;RHOBTB2;ANO3;NME1;XRN2;ME3;ERC2;SSBP2
Genes Up-Regulated In Myotonic Dystrophy 2 Markers In Human Skeletal Muscle GSE48828	242/1361	1.52e-05	5.14e-05	0	0	1.37763	15.286	CYFIP2;PATJ;RAPH1;ADARB1;GPATCH8;NUDT4;NDST1;GOLGA4;ZXDB;RPS6KA2;NIPAL3;SLC12A6;BTRC;FBXO9;ANKS1B;UNC13B;EPHA4;RBFOX2;LIMCH1;ZFP3;ZFP976;CIRBP;ADGRA3;RC3H2;DKK2;SFRP4;DAAM1;AKAP9;MAML3;TLN2;MTMR3;ABCB4;ENDOD1;TAPBPL;MBTD1;NKAIN2;NEU3;ABR;FLRT2;HLCS;FLRT3;EPB41L2;LDHD;DPH6;SNX7;ZBED5;TRPM4;MYH7B;EGR1;RABGAP1L;ARPP21;H3F3B;TMEM74B;FAM78A;LRBA;SLC35E3;PBX2;DDIT4L;FAT1;NAPEPLD;PCDHB6;ITGBL1;GALNTL6;C…
Genes Up-Regulated In Friedreich Ataxia iPSCs Expression Vs Control Lung GSE22651	759/4838	1.53e-05	5.18e-05	0	0	1.21615	13.4838	PNMT;PATJ;PID1;TLNRD1;RAPH1;ADARB1;ACCS;DCAF5;SLC4A4;PTPDC1;GLDN;NDST1;WDR91;LIPG;MPV17;IER5;ZP3R;MEF2A;MBNL2;IAH1;NHLRC3;STARD8;HPCAL1;CACNA2D2;MRTFA;UPB1;DKK2;BCR;GPR162;RBP4;ADCY9;DAAM1;DAAM2;HECW2;ORAI3;MAP1A;ACOT2;ACOT1;ATF6;ACOT5;PLBD2;ATF3;VPS28;ACOT4;SKAP2;ACOT3;LRPAP1;MTMR3;ANAPC16;CHIA1;FLII;PDGFB;ENDOD1;NEDD4L;AGAP3;TAPBPL;FAM149A;XKRX;TRP53RKA;ABR;FLRT2;C7;HLCS;FLRT3;CHST15;S100A13;SF…
Locuses With Increased DNA Methylation In Frontal Lobe Region Of AD Vs Control GSE72778	272/1555	1.56e-05	5.28e-05	0	0	1.35278	14.9693	PNMT;SPON1;NEXMIF;STMN4;ICAM5;ELK1;SLC4A4;PTPDC1;HS6ST2;RPS6KA3;SOX3;DPYSL4;ZXDB;AKT3;KIF21B;ACTN2;ARL15;LIMCH1;STARD8;BOLA1;ISLR2;PHKA1;CSNK1D;ACSL4;EBF4;MTURN;ADCY9;SPIN2C;MAML3;BEX3;BEX2;MAGED1;ZFP503;FIGNL2;TMTC1;XKRX;ABR;SEC14L1;FAM124A;HLCS;PENK;RAB11FIP4;VPS16;NTSR2;SMIM10L2A;SRPK3;EGR4;CADM1;MAGEE2;LRBA;EIF2AK4;L1CAM;SMARCA1;ELL2;GDF7;SQLE;GLUD1;SLC6A6;CPEB1;WNK3;MAGED2;ZCCHC12;SRPX;GPR26…
Markers Of Dorsal Motor Nucleus Of The Vagus In Myelencephalon PMID22996553	54/221	1.68e-05	5.66e-05	0	0	2.03057	22.3256	PNMT;RAB3B;TENM1;ZCCHC12;OXTR;ONECUT2;DGKB;GPR68;MCUB;NPY2R;PCDH11X;CELF3;FNBP1L;RGS4;CAMKV;SLC16A3;SLC18A3;HMGCS1;FST;CACNA2D2;FNDC9;DKK2;SLC7A4;GPRIN1;CDH18;NECAB2;CHRNA4;CHRNA7;ILDR2;CRYZ;KCNV1;ARVCF;NKAIN3;GNG4;SLITRK6;SCN3B;TAC1;WNT4;VAT1;TMEM132E;LRRN3;RASL10A;KCNIP4;KLHL1;TRPV2;ATP2B4;BAIAP3;HCRTR1;SYT17;MGAT4C;NELL1;KLF5;IFI27L2B;DMRTC1A
Genes Down-Regulated In Expression In PC12 Cells With AR112Q Upon Ligand Stimulation GSE50383	2022-11-20	1.77e-05	5.97e-05	0	0	7.6256	83.425	MEIS1;ADORA2A;HEY1;CLMN;ANO6;KCNN3;NYAP2;MEST;RHOB;BOK;DGKH
Genes Down-Regulated In Endothelial Cells Of R6/2 Vs WT PMID32681824	46/179	1.77e-05	5.97e-05	0	0	2.16987	23.7366	SPARC;ARHGEF28;PELI2;PDGFB;NEDD4L;PSIP1;PPP1R9A;CACNA1E;HS6ST3;NRGN;ATXN1;DBP;PENK;UBC;GCNT2;PMEPA1;CKB;STX3;HRAS;GABRD;MAP4K3;ANKS1B;USP46;3110082I17RIK;MBNL2;RBFOX2;AUTS2;CADM1;KCND2;ARL15;DCC;TCF12;NR1D1;GPCPD1;FOXP1;MYO1D;CACNB2;PCP4;PDE10A;NBEA;TBC1D5;PI4KA;RGS7BP;ST6GALNAC3;SCN4B;NGEF
Genes Changed In Migrating Neuroblasts Of zQ175DN Vs WT PMID32681824	30/99	1.8e-05	6.05e-05	0	0	2.72195	29.7376	SNAP25;MCTP1;PTPRS;ZBTB20;NEDD4L;RORA;NOL4;CDH8;PHF21A;HS6ST3;IGF1R;NKAIN2;PENK;CKB;KIRREL3;KCND2;DCC;SGIP1;STRBP;KCNIP4;FBXL17;PTPRD;REEP1;LRFN5;RALYL;DLG2;KCNMA1;GALNTL6;DGKI;CDH18
Mouse Cortex Cort Interneuron Markers PMID19013282	374/2228	1.87e-05	6.27e-05	0	0	1.29392	14.0877	PNMT;SLC46A3;SPON1;OXTR;PNMAL1;WIPF2;HDAC11;TONSL;MTFR1L;ADARB1;ADARB2;SLC4A4;AW146154;PTPDC1;COMTD1;DPYSL4;ADGRA1;OGFOD1;CCDC97;KIF21B;LGALS8;BTRC;EPHB2;SCN1B;MED1;IAH1;PRKCB;ACTN1;DDX11;ENTPD5;COL23A1;KRT1;FIBCD1;ADGRA3;CSNK1D;THAP1;ZC2HC1C;RBP4;GAREM1;DAAM2;MAP1A;SIK3;TLN2;PLBD2;ATF4;LRPAP1;SPTBN4;ADCYAP1R1;EPHA10;FLII;FBF1;SDC3;ENDOD1;NEDD4L;STC1;6430548M08RIK;ZBTB4;PPL;HIF1A;ANAPC11;SEC14L2;…
Up-regulated Genes In Cortex Of 6 Mon HD Q140 Mice Vs Q20 GSE78272	54/222	1.92e-05	6.45e-05	0	0	2.01836	21.9165	FAAH;ZFP367;SLC35F5;STMN4;NUDT4;TMEM145;GRM2;TMEM44;TRIM3;TGM3;PDK1;UNC13B;PIAS3;MLIP;SLC30A3;COL23A1;RSAD1;NPY1R;ACSL5;CTPS2;WNT9A;MTURN;SLC7A8;NPTXR;LTK;ILDR2;BHLHE22;HDAC9;ADCY6;DRP2;GRK3;5730409E04RIK;CDH20;ZMAT4;VPS8;SLIT1;VILL;TRPM4;GM10471;ARNT2;COL26A1;YIPF2;EYA1;CAV2;CCDC136;NR2F1;TRPV2;FAM189A1;KRT12;SEMA4F;PLEKHA7;GM5862;RHEBL1;PAM
Genes Up-Regulated In Influence Of Hsp90 Inhibitor On Expression In WT Mice GSE29681	286/1651	2e-05	6.68e-05	0	0	1.33758	14.4756	LPGAT1;STMN4;FNBP1L;SLC4A4;GPATCH8;NIPAL3;CHORDC1;PWWP2A;SOX9;PKNOX1;BTRC;IER5;ANKS1B;EPHA4;MED1;PRKCI;MBNL2;UNC13A;NHLRC3;ACTN1;RC3H2;EML5;TRIM17;RFX4;AKAP9;XRN2;SIK3;TRIB3;ATF6;ATF3;RNF122;ATF4;SF1;SPTBN4;TGFA;NEDD4L;HIF1A;DEDD2;HSPH1;INPP5F;EPB41L1;PCBP1;D5ERTD579E;TNRC18;RREB1;SLC19A2;CDK17;CREBBP;PRPF38B;NDFIP2;RABGAP1L;H3F3B;BCL11B;GADD45B;ZFP638;NEBL;SUCO;NETO2;INO80;DCLK1;ZWINT;HNRNPM;BC0…
Genes Down-Regulated In HD Grade 2 Markers In Human Frontal Lobe BA4 (HG-U133A) GSE3790	66/289	2.22e-05	7.43e-05	0	0	1.86069	19.935	SNAP25;TMEM151B;TUSC3;PITPNA;ZFAND5;GDE1;PTPRF;NUDT4;RGS4;RBM3;PCMT1;LAPTM4B;NNT;ENSA;NEFL;CHP1;KIFAP3;LGALS8;FBXO9;IDH3A;PRMT8;PCDHGA6;MBNL2;RBFOX2;WARS;HMGCS1;CIRBP;ETV1;KCNAB2;SCAMP1;FOXP1;ARL4C;ARHGEF9;PCP4;TUBB2A;CCKBR;CDH12;ARHGEF4;ATP6V0D1;GAS7;PRPS1;ITPR1;CAMKK2;MAPK9;PSAP;PGK1;SMYD2;RAB6A;TAC1;GABRD;ZBTB18;EGR1;PRNP;PLCL2;NSG1;TUBB4B;DCLK1;PTPRD;BC005537;DPY19L1;CLCN4;GLRB;TOMM70A;CALM3;…
Down-regulated Insoluble Proteins In Cerebral Cortex Of 12 Wk R6/2 Mice PXD004973	184/1000	2.33e-05	7.78e-05	0	0	1.4306	15.2595	RAB3B;PATJ;RAB3A;SPARC;DCAF8;CNDP2;RPS6KA4;TMEM266;DACH1;APMAP;RPS6KA2;AKT3;CHORDC1;LGALS8;SLC12A6;STK32A;AGFG2;NUDT12;ANKS1B;PHLDA3;MCCC2;MLIP;RBFOX2;ATP6V1G2;DGAT1;PPTC7;ACTN2;PRKCB;USP3;CMC2;ALG5;ACSL4;CDYL;PLPP6;RAB30;GAREM1;MAP1A;PGP;SIK3;DENND6B;PLBD2;CSNK1G2;KANK3;NECAB2;ZCCHC8;DIPK1B;SAR1A;ARL3;GLO1;MGST3;PROZ;RASAL1;RASGRP2;ACAT2;FOXO1;OSGEP;CACNA1G;TRP53RKA;ARHGAP21;STRIP2;EPB41L1;CDH20…
Genes Up-Regulated In Non-myotonic Dystrophy Markers In Human Skeletal Muscle GSE48828	255/1454	2.43e-05	8.1e-05	0	0	1.35501	14.3975	SPARC;RPL31;RAPH1;ADARB1;ACCS;GPATCH8;NUDT4;NDST1;ZXDB;RPS6KA2;NIPAL3;PTGFRN;SLC12A6;BTRC;FBXO9;ANKS1B;UNC13B;RBFOX2;LIMCH1;ENTPD5;ZFP3;METTL2;CIRBP;RC3H2;DKK2;MTURN;SFRP4;DAAM1;MAP1A;AKAP9;TLN2;CCDC82;ATF4;SF1;MTMR3;MAGED1;TAPBPL;SMIM7;ZBTB4;MBTD1;ABR;PRRC1;FLRT2;HLCS;EPB41L2;DPH6;ZBED5;TRPM4;ABCA1;BBS2;MYH7B;RABGAP1L;H3F3B;TMEM74B;FAM78A;LRBA;PLK2;SLC35E3;PBX2;DCLK1;HNRNPM;FAT1;PCDHB6;DCHS1;CAL…
Genes Changed In Brain Vs Spinal Cord Derived OPCs From E13.5 Mouse Embryos PMID30078729	313/1833	2.56e-05	8.52e-05	0	0	1.31603	13.9142	CPNE8;SPON1;CPNE7;WIPF3;SCX;HTR4;HS6ST3;RXFP3;ZFYVE28;SOX3;FRAT1;DPYSL4;AI593442;GJA3;RASSF3;SCN11A;LIPG;TUNAR;PTGFRN;SOX9;IL15RA;STARD4;ACTN2;SLC6A15;ZFP976;CACNA2D2;ISLR2;SOX11;SLC6A11;VWA5B2;SYTL5;DKK2;TIAM2;GPR165;ADCY9;DAAM2;RFX4;ASTN2;NGEF;SKAP2;KCTD16;SPTBN4;EPHA10;TMEM63C;ABCB4;ZFP503;FIGNL2;TMTC1;ADAMTS10;CRHR1;SEC14L1;FLRT3;STC2;PENK;OTOF;ZBTB7C;JAG2;ABCA1;BCL11B;NEBL;FAM78A;GREB1;IQSEC…
Genes Up-Regulated In Genes Changed In HDACi 4B Treated Vs Untreated Friedreich Ataxia Carrier Blood Cells GSE30933	208/1154	2.63e-05	8.75e-05	0	0	1.39688	14.7308	CYFIP2;SPON1;PATJ;FAAH;SPARC;SERPINE2;XYLT2;ICAM5;ADARB1;ACCS;SAMD14;PPP4R4;NIPAL3;HABP4;IER5;FBXO2;KRT2;GCAT;MTURN;HECW2;ASPHD2;TRIB3;MXRA7;BEX3;PNP2;MAGED1;6430548M08RIK;FAM171A1;RAB11FIP5;JAG2;NDFIP2;WNT10A;BCL11B;TMEM74B;CDC7;L1CAM;WDR54;NR2F6;CALY;FXYD2;DCHS1;CALM3;PAM;ITM2C;LRRC1;ADAMTSL5;TMEM44;TNKS1BP1;JARID2;GPRASP2;ZFP365;ANKDD1A;IZUMO4;METRN;SYP;FAHD2A;ITPKB;CDCP1;ANGPTL6;TMEM106C;TUT1…
Genes Down-Regulated In Friedreich Ataxia iPSCs Expression Vs HS-27 Cell Line GSE22651	730/4656	2.65e-05	8.78e-05	0	0	1.21193	12.7738	CYFIP2;TRIR;PATJ;PNMAL1;RPL31;WIPF3;WDR83;SPINT2;FNBP1L;PTPDC1;GLDN;GCSH;COMTD1;PPP4R4;4921524J17RIK;RAVER2;DPYSL3;LIPG;STMN1;PWWP2A;ZFP286;ANKS1B;UNC13B;RNF138RT1;HES6;MED1;PRKCI;STARD4;WSB2;PRKCB;STARD7;DDX11;COL23A1;CACNA2D2;SOX11;GTPBP3;EML4;ZC2HC1C;DAAM1;RBP1;FAR1;FAR2;UBA52;NGEF;ACOT4;SF1;ATF4;SLBP;PIF1;ZBTB8A;SAR1A;CTBP2;PNP2;FIGNL2;NEDD4L;IQGAP2;C9ORF72;FAM149A;DEDD2;FAM124A;HSPH1;RIC8B;P…
Differentially Expressed Proteins In Hippocampus Of 10 Mon HD Q175 Mice Vs Q20 PXD005538	15/35	2.67e-05	8.85e-05	0	0	4.68315	49.3199	SMAD3;PLEKHA2;PRKCB;ARHGEF17;TCF20;KCTD4;CAMKK1;DNAJB1;PPP1R1B;HOMER3;ANKRD63;ERC2;SCN4B;LZTS3;HSPA1A
Genes Up-Regulated In The Astrocytes Of R6/2 Mice Vs WT At 1 Month Old GSE124846	63/274	2.71e-05	8.99e-05	0	0	1.87637	19.7286	AHCTF1;NEXMIF;1700014D04RIK;RAPH1;CHD2;AFF4;CDH8;4930447C04RIK;ZDBF2;RBM3;CCND2;SESN3;OGFOD1;NDST3;EP300;CCNL1;UNC13B;ANKDD1A;MLIP;EPHA6;RBFOX2;DCC;ZFP976;GKN3;RC3H2;ANO2;DSG1C;SLC7A8;ZFP40;PHIP;RBM24;CDH18;KMT2D;KLHL14;GREB1L;KCNA5;NYAP2;PRR14L;ADAMTS19;FAM120C;SLITRK4;HAS3;SLITRK6;PTCHD4;SCN3B;SCN3A;EXPH5;BPTF;CD163;LRRN3;ZFP638;INSR;MGA;RANBP17;SLC4A10;ARHGAP32;LRFN5;SLCO4C1;ACIN1;MAP3K13;ZFP8…
Genes Up-Regulated In iSPNs Of zQ175DN Vs HdhQ20 PMID32681824	375/2244	2.72e-05	9.01e-05	0	0	1.28625	13.5198	CPNE8;FAAH;OXTR;SPARC;NEXMIF;RAPH1;ZFP606;PTPDC1;NUDT4;ZDBF2;GCSH;DPYSL4;ADGRA1;DPYSL3;NDST3;KIF21B;LGALS8;KIFAP3;DYNC2H1;IL15RA;HES6;ENTPD5;RSAD1;CIRBP;PHKA1;YOD1;B630019K06RIK;SOX11;ACSL4;SLC6A11;TMEM170B;PLPP6;DAAM1;DAAM2;ORAI3;KCNQ3;ACOT1;ZFP7;CTBP2;MEAF6;IGSF3;INTU;ZFP868;PCDH10;PDGFB;PCDH15;ENDOD1;NYAP2;HIF1A;DEDD2;STRIP1;NKAIN3;PRRC1;FLRT2;TNRC18;N4BP2;PCK2;ZBTB7C;SLC19A2;VAT1;ABCA1;PPP1R2…
Genes Down-Regulated In R6/1 Mice Treated With AAV2/1-Elk-1 Vs AAV2/1-control GSE139847	16/39	2.8e-05	9.23e-05	0	0	4.34461	45.5534	VAT1;ZCCHC12;TMEM255A;CPNE7;RASGRF2;SYNPO2;NPY2R;ECEL1;IRS4;NGB;SHISAL1;COCH;DLK1;BAIAP3;RESP18;HAP1
Up-regulated Soluble Proteins In Cerebral Cortex Of 8 Wk R6/2 Mice PXD004973	153/810	2.93e-05	9.66e-05	0	0	1.47411	15.3869	MTCH1;SERPINE2;WDSUB1;RPL31;CPNE7;ZBTB22;HS6ST2;RPS16;UROD;WDR91;DPF1;SACS;ANKS1B;PDK1;AGTPBP1;SLC30A3;VPS33B;PHKA1;ACSL4;ZCRB1;KCTD4;FRMD6;GPD1;PGP;SIK3;VDAC2;DENND6B;DGKI;SNRPB;NECAB3;SAR1A;CTBP2;PEF1;UBA6;PNP2;CHRNA4;GLO1;TMTC1;HNRNPLL;TIMM50;FAM171A1;DGUOK;ARHGAP21;COMMD9;ZMAT4;CDH22;OTOF;GRIA3;MPDU1;ABCA1;FZD1;VAT1;OSBPL8;ODF2;LRBA;RAB27A;SMAD9;B3GALT5;SYNJ2;COQ9;HSPA2;HSPA12A;SYT9;REEP1;NSF…
Friedreich Ataxia iPSCs Expression Vs MR90C2P27 Cell Line GSE22651	632/3986	3.08e-05	0.000102	0	0	1.2223	12.6964	PNMT;WIPF3;EMC10;FNBP1L;GLE1;GCSH;SAMD14;AI593442;PPP4R4;WDR91;PWWP2A;PKNOX1;IER5;UNC13B;RNF138RT1;MED1;PRKCI;IAH1;WSB2;COL23A1;HPCAL1;SOX11;GTPBP3;EML4;ZC2HC1C;DAAM1;RBP1;ASPHD2;FAR2;RABL2;PLBD2;VPS28;SKAP2;ATF4;SLBP;LRPAP1;SAR1A;MEAF6;PDGFB;FIGNL2;AGAP3;C9ORF72;HIF1A;DEDD2;RHOT2;FAM124A;RIC8B;HLCS;RDH11;FLRT3;EPB41L2;D5ERTD579E;CFAP65;VTI1B;S100A10;JAG2;ACD;JUP;NEBL;LRBA;NR2F1;L1CAM;GRIN2B;WDR5…
Genes Up-Regulated In dSPNs Of 9 Wks R6/2 Vs WT PMID32681824	412/2494	3.09e-05	0.000102	0	0	1.27062	13.1932	TRIR;PATJ;PID1;TMEM200A;WIPF2;NEXMIF;RAPH1;DCAF5;ALKBH6;PTPDC1;GCSH;GLE1;SAMD14;DPYSL3;NDST3;RBFOX2;9330159F19RIK;B630019K06RIK;SOX11;GPR165;DAAM1;ACOT2;SPIN2C;ATF4;SF1;SKAP2;SLBP;CTBP2;FLII;TAPBPL;HIF1A;CFAP69;PIP5K1B;ABCA1;CREBBP;PRPF38B;H3F3B;GTF2IRD2;SETD1B;NR2F1;POU6F2;EIF2AK4;PHC3;MEX3A;ADI1;FAT1;CDK13;PHF2;ZFP367;PHF1;TGFB1I1;MEI4;ARHGAP1;SHD;TUBA1B;TCTN2;TRIM3;NELFB;2610301B20RIK;GPRASP2;…
Genes Enriched In Quiescent Vs Activated NSCs PMID29983386	93/448	3.3e-05	0.000108	0	0	1.65068	17.0331	PIGS;POMT2;SLC46A3;ATP8A1;GDE1;RORA;MSMO1;SLC4A4;CXCL14;FAM228B;SYNE1;TMEM47;DOCK10;LAPTM4B;DPYSL4;SESN1;COTL1;SOX9;ANKS1B;PHLDA3;PPP1R16B;KIRREL3;MBNL2;PAQR7;SGIP1;LIMCH1;MMD;FBXO2;GAA;ARHGEF17;ARAP2;CACNA2D2;SLC6A11;LIFR;SCAMP1;CYP7B1;ATP1B1;SHISA9;DAAM2;KCNMA1;SLC9A9;ARHGEF4;RBMS1;TNIK;CD302;CD47;ASTN2;HBEGF;DGKH;AGPAT5;ADCYAP1R1;SLC24A3;HLF;SRC;PCDH10;NTM;NEDD4L;AK4;PTN;TMEM164;AGPAT3;ENHO;AB…
Genes Up-Regulated In Expression In 1 D WT Mice Vs 4 Wk HSALR Myotonic Dystrophy Mice GSE60487	612/3852	3.39e-05	0.000111	0	0	1.22388	12.5948	PATJ;NEXMIF;GM21698;XYLT2;SPINT2;ADARB2;FNBP1L;DCAF4;ZDBF2;SAMD14;ZFYVE27;DPYSL4;WDR91;STMN1;HOMER3;ANKS1B;HES6;STARD4;RBFOX2;DDX11;COL23A1;HPCAL1;MRTFA;B630019K06RIK;SOX11;WDR73;UPB1;RC3H2;DKK2;EML4;ARMC6;RFX4;ACOT2;ACOT1;RABL2;UBA52;PLBD2;PIF1;ZBTB8A;SAR1A;CTBP2;PDGFB;ENDOD1;NYAP2;SLC30A10;ADAMTS10;ADAMTS19;CHST15;SFN;ZBTB7A;EXPH5;JAG2;MYH7B;PRPF38B;ARPP21;GTF2IRD2;LRBA;POU6F2;PBX2;INO80;GRIN2B…
Genes Down-Regulated In Expression In Quadriceps Muscle Of 3 Mon Mbnl1 KO Myotonic Dystrophy Mice GSE14691	118/598	3.5e-05	0.000115	0	0	1.552	15.9243	RIPOR2;CCNK;SPON1;ATP8A1;IRS1;RORA;DCAF5;CXCL14;GPATCH8;CYB5D2;PCMT1;LAPTM4B;PPP1CC;TMEM267;FNTA;AGTPBP1;TAGAP1;CMC2;TPM1;LIFR;SLC9A2;TIAM1;ADCY9;OBSCN;GPD1;TLN2;6430571L13RIK;ZFP467;PFKFB3;PKDCC;ANAPC16;EPB41;AK4;TMTC1;ACTR3B;RHOBTB2;SLC9A3R2;ENHO;GRK2;PCBP4;RNF170;ST3GAL2;SLC15A5;MARK2;RABGAP1L;SMAD3;FAM78A;GFPT2;DDIT4L;DNAJC13;ELL2;REEP1;CPEB1;P4HA1;UBLCP1;ADI1;MOB2;UNC119;CALM3;AMOTL1;CALM1;K…
Differentially Expressed Soluble Proteins In Striatum Of 12 Wk R6/2 Mice PXD004973	154/819	3.51e-05	0.000115	0	0	1.46575	15.0335	CMAS;SERPINE2;DGKB;1110065P20RIK;CXCL14;RPS6KA4;TMEM266;OSBP;DPF1;TOM1;DAG1;PPFIA3;EPM2A;CHRNB2;DGAT2;MBNL2;SLC30A3;ACTN2;ACTN1;KRT2;TPM1;CDYL;BCR;ERN1;MINPP1;OBSCN;HECW2;MAP1A;AKAP9;RRAGD;PGP;LY6H;NGEF;PLBD2;CEMIP;BEX2;SPTBN5;NECAB3;TMEM161A;CCDC149;PEF1;SMYD5;PNP2;MRI1;TAPBPL;OMA1;RASGRP2;HNRNPLL;FBXO44;CACNA1E;PMF1;TRP53I11;ASIC4;NKAIN3;NEU1;CDH22;SYNDIG1;PGK1;KCNN1;PLXNA1;OTOF;DRD1;CBX8;ODF2;…
Genes Up-Regulated In Human Granule Cells Vs Basket Cells GSE101912	106/526	3.55e-05	0.000116	0	0	1.59185	16.3087	DGKG;WDSUB1;SLC4A4;SAMD14;RIMS3;MCIDAS;WDR91;STK32A;SAMD10;EPHA4;PHYH;COL27A1;EPDR1;CYS1;DKK2;CACNB2;CACNB3;FRMD6;TRIM17;ORAI2;PKP2;KCTD12;SQSTM1;CCNO;ZFP467;GPR85;FLRT3;KCNN2;ARPP21;EGR4;GTF2IRD2;NEBL;ANKRD22;L1CAM;FOXN2;DNAJC15;DCLK1;TRMT9B;CCDC88B;NET1;PKIB;TMEM236;ZFAT;MAP3K13;FANK1;ABCD2;MCTP1;KCNK9;ONECUT2;CELF1;MTCL1;PTPRQ;PTPRO;CHD7;PCSK9;PPP1R9A;ABCC12;LRRC1;MEDAG;HEBP2;CRTAC1;NNT;PGM5;S…
Markers Of Locus Ceruleus In Pontine Tegmentum PMID22996553	50/205	3.56e-05	0.000116	0	0	2.02416	20.7338	MCTP1;DGKB;GPR68;PTPRO;NUDT4;SMPD3;ADGRA1;CAMKV;DPYSL3;ENC1;SLC16A3;NANOS1;MREG;HMGCS1;TMEM255A;FST;HPCAL1;CACNA2D2;TEX15;TMEM150C;SLC7A4;CACNB3;DOK4;CDH18;SKAP2;NECAB2;SAMD5;CHRNA7;NXPH4;TRP53I11;ARVCF;TMEM65;GCNT2;PAK3;SCN3A;CACNG3;WNT4;VAT1;ANKRD34C;PDE2A;KCNIP4;DLK1;HCRTR1;SYT17;REEP1;LRFN2;LRFN5;KCNS2;RIMBP2;LNX1
GABAergic Interneuron Gene Module PMID19638972	33/117	3.63e-05	0.000118	0	0	2.46002	25.1511	AGPAT5;FLII;DIRAS1;HMGB3;BHLHE22;SIPA1L2;SHD;SLC9A3R2;MROH1;EPB41L1;PMVK;LGALS8;CCDC50;WNT4;HSDL2;CTPS2;KRT77;ELOVL6;EIF2AK4;AMPD3;KCTD4;GRHL1;TRAIP;GATAD2A;DAZL;SLC22A23;CSDC2;PKP2;CREBRF;ACOT1;FKBP4;KANK3;GSDME
Proteins Depleted In HD Patient iPSC-derived Neurons Vs Control iPSC-derived Neurons PMID30768179	43/168	3.64e-05	0.000118	0	0	2.15681	22.0464	CYFIP2;SNAP25;AMER2;MTPN;ISYNA1;RAB3A;SERPINE2;IGSF3;DIRAS1;GBE1;NEDD4L;PSIP1;ZCCHC17;FAM169A;STRN4;AKAP12;DACH1;CAMKV;BASP1;EPB41L1;KIF3A;CASKIN1;PGK1;PLXNA1;NEFM;EPHB2;PPFIA3;NPDC1;KIDINS220;TSC22D2;HPCAL1;DAB2IP;CACNA2D2;PPP2R5D;LAMB1;SYP;ATP1B1;L1CAM;GNAO1;CARHSP1;GPRIN1;CD47;NGEF
Friedreich Ataxia iPSCs Expression Vs BG01 Cell Line GSE22651	740/4737	3.72e-05	0.000121	0	0	1.20618	12.3032	TRIR;SERPINE2;RPL31;WIPF3;WDR83;ADARB1;FNBP1L;DCAF4;PTPDC1;GCSH;PCMT1;PPP4R4;ZXDB;WDR91;LIPG;PWWP2A;IER5;HES6;MED1;PRKCI;WSB2;PRKCB;CACNA2D2;PHKA1;FRS3;DAAM1;RBP1;SPIN2C;FAR2;PLBD2;ACOT4;ATF4;SAR1A;ANAPC16;CTBP1;PNP2;FIGNL2;AGAP3;C9ORF72;DEDD2;XKRX;FAM171A1;ABR;FAM124A;RIC8B;EPB41L1;RDH11;EPB41L2;LDHD;CFAP69;SFN;LHPP;VTI1B;S100A10;JAG2;ABCA1;NDFIP2;JUP;CADM1;TIPARP;NEBL;GTF2IRD2;NCAPH2;LRBA;PBX2;…
Genes Up-Regulated In Expression In PC12 Cells With nonSUMOylatable AR112Q (KRKR) Upon Ligand Stimulation GSE50383	45/179	3.91e-05	0.000127	0	0	2.10596	21.3747	ADCYAP1R1;CEBPB;TLNRD1;UXS1;ZFAND5;ADARB1;MESD;ETS2;PTPRF;SLC8A2;LRRC1;SRM;DNAJB1;GOLGA4;FUT8;LSM11;ABLIM2;PSMD5;OLFML3;SESN1;NEU1;PLXNA1;STX3;BTRC;ANKRD50;CCDC134;TGFB3;TIPARP;DUSP1;EDEM1;NEK6;KCNIP3;SEMA4C;EIF2AK4;ARFGAP3;BAIAP2;ERN1;ENAH;DISP3;CDK8;DAAM1;DGKQ;SGK3;ARL8B;KCTD16
Genes Up-Regulated In WT Treated With PLX3397 Vs Control GSE136158	211/1181	4.02e-05	0.00013	0	0	1.38154	13.9819	POP5;RPL31;GDE1;EMC10;STMN4;ICAM5;ZDHHC1;DCAF4;RPS6KA4;DPF1;CCDC97;IER5;IAH1;ACTN2;ALG1;WDR73;GCAT;KRT9;AFG3L2;RBP4;ADGRB1;CSNK2B;ASPHD2;ATP6V0D1;NGEF;NECAB2;GRB7;IGSF8;ZBTB8A;ANAPC16;AGAP3;MRPL12;ACTR3B;DGUOK;PENK;DYM;GSG1L;VTI1B;LHPP;S100A10;VPS16;EGR1;ACD;TMEM86B;PLK5;JUP;DDIT4L;WDR54;FXYD2;PPP1R1B;GIPC2;PSMG4;CYSTM1;NOL12;SETD4;ACY1;GRIK5;CITED4;MED16;SHB;NAT14;C1QTNF4;CAMKV;TNFAIP8L1;SH3BGRL…
Genes Down-Regulated In Astrocytes Of HdhQ170 Vs HdhQ20 PMID32681824	30/103	4.17e-05	0.000135	0	0	2.5722	25.9422	HRK;MTCH1;LRRC10B;ARL3;ITPR1;PSMA7;ARHGDIB;PENK;CLPTM1;LRRC8C;PMEPA1;SH3BGRL3;HRAS;LZTS3;ZFP579;COX8A;OSBPL8;ARPP21;GPR6;UPB1;KRT9;ARHGAP10;GAREM1;SYNDIG1L;PDE10A;SLMAP;PPP1R1B;SCN4B;JCAD;ITGA9
Up-regulated Genes In Skin Of HD Q175 Mice PMID26900923	207/1157	4.37e-05	0.000141	0	0	1.38343	13.8861	CYFIP2;FAAH;SLC46A1;TONSL;ELK1;GBA2;RPS6KA4;PTGFRN;TNS4;SAMD10;FBXO9;UNC13B;COL23A1;KRT1;AP1B1;ACSL5;SCAMP1;FNDC9;PLPP6;TIAM1;DAAM1;RIN1;KCTD15;SKAP2;HIF1A;PPL;PGS1;SEC14L2;NEU3;ABR;TSPAN5;SNX7;RREB1;EXPH5;S100A10;SLC19A2;JAG2;WNT10A;RABGAP1L;JUP;LRBA;NCAPH2;ERLIN1;L1CAM;SRPK1;NET1;PKIB;PPP5C;GJB3;SDC1;PLCH2;CALM1;ACHE;LAD1;ZFP367;SLC35F5;MEI4;ARHGAP1;CLTB;SIPA1L3;PTPRF;LRRC1;C77080;ZCWPW1;EPB41L…
Genes Changed In HDACi 106 Vs Vehicle Treated Healthy Donor Blood Cells GSE30933	558/3491	4.39e-05	0.000142	0	0	1.22901	12.3325	CYFIP2;PATJ;PID1;SERPINE2;RAPH1;ADARB1;FNBP1L;DCAF4;PCMT1;SAMD14;CNST;DPYSL4;PPP4R4;4921524J17RIK;DPYSL3;MPV17;PKNOX1;IER5;HES6;MED1;RBFOX2;PRKCB;COL23A1;MRTFA;EML4;ARMC6;HECW2;RBP1;FAR2;RABL2;ATF6;RNF122;SKAP2;SF1;LRPAP1;SAR1A;ANAPC16;FLII;NEDD4L;WDR61;TAPBPL;MRPL12;HIF1A;HSPH1;RIC8B;RDH11;RRS1;SLC19A1;LHPP;JAG2;NDFIP2;NDFIP1;JUP;CADM1;H3F3B;TIPARP;GTF2IRD2;CDC7;EIF2AK4;INO80;WDR54;NR2F6;CYLD;UC…
Genes Down-Regulated In Endothelial Cells Of zQ175DN Vs WT PMID32681824	99/487	4.46e-05	0.000144	0	0	1.60818	16.1099	SPARC;SPPL2A;ZBTB20;FNBP1L;SLC4A4;PPP1CB;RGS4;GOLGA4;CNST;RPS16;SESN3;SESN1;IER5;ANKRD13A;RAB2A;MAGI3;PLPP6;AKAP9;SRSF7;JCAD;KANK3;ISYNA1;CTTNBP2;SLC1A1;CACNA1E;PHF21A;MBTD1;FUT8;PRKAR2B;EPB41L2;PSAP;PENK;UBC;S100A13;MAP3K20;ZBTB7A;SKIL;LRRN3;ODF2;INSR;SSH1;NET1;SLC6A6;BC005537;ARHGAP32;TBCK;STAG1;ARL2BP;BCL2;CDK13;CALM1;ZFP644;SETD2;TCF20;SIPA1L3;PTPRF;DUSP11;AKAP12;AKAP13;SPRED2;MED13;TMSB4X;YW…
Friedreich Ataxia iPSCs Expression Vs H9 Cell Line GSE22651	658/4177	4.46e-05	0.000144	0	0	1.21323	12.1528	CYFIP2;TRIR;SERPINE2;RPL31;WIPF3;ACCS;FNBP1L;ALKBH6;GCSH;SAMD14;MSANTD1;PPP4R4;ZXDB;WDR91;PKNOX1;IER5;RNF138RT1;MED1;PRKCI;WSB2;PRKCB;FRS3;ZC2HC1C;ADCY9;DAAM1;SPIN2C;FAR2;PLBD2;VPS28;SKAP2;ATF4;SLBP;ZBTB8A;SAR1A;ANAPC16;FLII;FIGNL2;AGAP3;HIF1A;DEDD2;FAM171A1;RHOT2;RIC8B;RDH11;FLRT3;EPB41L2;SFN;ST3GAL2;VPS16;VTI1B;S100A10;JAG2;ABCA1;NDFIP2;ACD;JUP;TIPARP;NEBL;LRBA;THAP12;INO80;DAZL;TMEM199;PKIB;SQ…
Expression In Quadriceps Muscle Of Clcn1 Null Myotonic Dystrophy Mice (MOE430A Array) GSE14691	134/699	4.47e-05	0.000144	0	0	1.49874	15.0091	PITPNA;SPPL2A;GDE1;CIB2;COMT;CXCL14;TMEM141;NUDT4;LAPTM4B;PPP1CC;RPS6KA3;CCND2;APMAP;FAM3C;ANKRD13A;FBXO9;MAP2K3;CAST;PHYH;DGAT2;DGAT1;IGFBP4;PHKA1;CMBL;ATP1B1;ATAD3A;RBP4;MORF4L2;SUB1;EHBP1L1;ACOT2;NHP2;PGP;PKP2;ACOT1;GEMIN7;CBFB;KMT2A;GLO1;MGST3;ITPR1;SLC41A1;AK4;FOXO1;RHOBTB2;HSPH1;EPB41L2;DYM;ST3GAL2;S100A10;MAP2K6;RAB11FIP5;WNT4;B3GALNT2;H3F3B;ZFP638;ODF2;CACFD1;IDH2;CCZ1;DDIT4L;SMARCA1;REEP…
Genes Changed In Astrocytes Of HdhQ50 Vs HdhQ20 PMID32681824	40/154	4.69e-05	0.000151	0	0	2.19892	21.9194	CYFIP2;CAMK2B;SLC24A2;SNAP25;RAB3A;MEAF6;NEXMIF;CHRNA7;ANKRD12;KCNA4;FAIM2;LAMP5;TRO;CKMT1;ARHGAP20;HRH3;FRRS1L;PRKAR2B;PHF24;PAK3;KRT222;EGR1;SMIM10L2A;PRMT8;ATP6V1G2;PRKCB;NAP1L2;KSR2;GRIN2B;SORL1;DCLK1;EML4;TTLL7;DLG2;AIM2;CALY;MTF2;CNTN3;TNIK;MAP3K13
Genes Up-Regulated In Astrocytes Of HdhQ50 Vs HdhQ20 PMID32681824	39/149	4.82e-05	0.000155	0	0	2.22162	22.0828	CYFIP2;CAMK2B;SLC24A2;SNAP25;RAB3A;MEAF6;NEXMIF;CHRNA7;ANKRD12;KCNA4;FAIM2;LAMP5;TRO;CKMT1;ARHGAP20;HRH3;FRRS1L;PRKAR2B;PHF24;PAK3;KRT222;EGR1;SMIM10L2A;PRMT8;ATP6V1G2;PRKCB;NAP1L2;KSR2;GRIN2B;SORL1;DCLK1;EML4;TTLL7;DLG2;CALY;MTF2;CNTN3;TNIK;MAP3K13
Markers Of Caudal Group Of Intralaminar Nuclei In Dorsal Thalamus PMID22996553	19/53	4.86e-05	0.000156	0	0	3.49163	34.6783	LMO1;GPR26;DCC;IGFBP3;PCDH20;TPBG;PCDH11X;GREB1L;GPR83;DKK2;DCBLD1;RGS4;TRP53I11;OLFM2;CYP2S1;CCDC88C;TLL1;RSPO1;QRFPR
Genes Down-Regulated In Expression In WT4 Line NSCs Vs ESCs GSE34201	611/3858	5.03e-05	0.000161	0	0	1.21808	12.0551	PNMT;POP5;PATJ;PID1;SERPINE2;TMEM200A;WIPF3;XYLT2;SPINT2;ACCS;ELK1;DCAF4;COMTD1;DPYSL3;UNC13B;MBNL2;UNC13A;IAH1;PRKCB;FIBCD1;CACNA2D2;SCAMP1;ZC2HC1C;RBP1;ACOT2;ACOT1;ASPHD2;FAR2;ASTN2;ACOT5;NGEF;ACOT3;PIF1;CTBP2;PNP2;FLII;IQGAP2;SLC30A10;MRPL12;FAM149A;RHOT2;FAM124A;PCDHA1;TERT;ADAMTS19;LDHD;SYNDIG1;CFAP69;SLC19A1;LHPP;S100A10;JAG2;PRPF38B;JUP;LRBA;EIF2AK4;ELL2;WDR54;DAZL;SLC6A6;CPEB1;GSTM6;HRK;S…
Genes Changed In Oligodendrocytes Of R6/2 Vs WT PMID32681824	51/213	5.04e-05	0.000161	0	0	1.97535	19.5487	PCDH11X;ZBTB20;STMN4;GRIK1;RORA;PIK3C2B;DOCK10;SYNPR;KIRREL3;PPP1R16B;MBNL2;LIMCH1;PRKCB;ANO4;ENAH;PCP4;DAAM1;SIK3;ST6GALNAC3;SCN4B;DGKI;GAS7;NPSR1;SLC24A2;DDX5;PCDH15;PRICKLE2;PTN;NKAIN2;ABLIM2;CDH20;CLMN;PENK;TRA2A;MAP7;CTNNA3;CKB;BRINP3;ABCA1;CADM1;PCDH7;KCNIP4;SYNJ2;TTLL7;GNAO1;PTPRD;MYO1D;TTLL5;RALYL;PDE10A;YPEL2
Expression In Cerebellum Of 6 Mon Ataxin-2 KO Spinocerebellar Ataxia 2 Mice GSE55177	92/447	5.08e-05	0.000162	0	0	1.63232	16.1407	RBM28;ZFAND5;LPCAT1;RYR3;IGF1R;TMEM47;EPB41L4B;TMEM267;LSM11;NEFL;NEFM;NEFH;AGFG2;KIRREL3;COL27A1;ACTL6B;TSC22D1;PLA2G4B;SOX11;CYS1;KCNAB2;RAD23B;LEMD1;ETV5;RNF41;PLPP6;FRMD6;MAP1A;PXDN;SIK3;KDELR2;DENND6B;TNIK;RGS7BP;RHOV;SCN4B;RNF122;VWA7;CEMIP;NECAB3;SRC;TMEM63C;CTTNBP2;NEDD4L;NOL4;TRP53RKA;GOLGA7B;TMEM25;FGD4;ABLIM1;ACVR1C;EPB41L1;CLMN;CREG1;CLPTM1;RNF39;ISOC1;GSG1L;SLIT3;STX3;IGFBP6;EXTL3;S1…
Cortex RNA M19 Module (Lightyellow) PMID26900923	81/383	5.33e-05	0.00017	0	0	1.68774	16.606	PIGS;CNTNAP1;TLNRD1;TMEM151B;TGFB1I1;HR;ELFN1;PTPRF;C77080;CCDC97;NEFL;EPHB2;PHLDA1;TBC1D10A;GIT1;UPF1;RNF44;MIGA2;FBXW8;ABCC8;ARHGEF17;MINK1;ISLR2;MRTFA;ARAP3;KCNAB2;MFSD12;ATAD3A;POU3F3;RNF41;GPR162;SNPH;GFOD2;ARHGEF4;HDAC5;BRSK2;LIN37;TMEM63C;GLS2;SRC;FLII;RGS16;2510039O18RIK;RAP1GAP;DEDD2;RELB;SLC9A3R2;RHOT2;ARVCF;RXRA;GRK2;RAB26;GPC1;RNF39;ANKRD54;PLXNA1;N4BP3;CCDC184;UBQLN4;ST3GAL2;MARK2;AC…
HD Grade 3 Markers In Human Frontal Lobe BA4 (HG-U133A) GSE3790	130/677	5.35e-05	0.00017	0	0	1.50119	14.766	OXTR;SPON1;WWC1;FNBP1L;CNDP2;CCND2;AKT3;DPYSL3;PIM1;SLC16A6;CHP1;SLC16A7;ARL6IP4;SLC12A6;PHLDA1;FBXO9;MEF2A;RAB2A;EPHA4;PRKCI;RBFOX2;SEMA6A;AIP;SCAMP1;ATP1B1;RNF41;TPST1;TMX4;HNRNPUL2;ARMCX6;SIK3;MTMR3;PFKFB3;INSIG1;STC1;LTBP3;ATXN1;GRK2;FLRT2;FLRT3;KIF3A;EPB41L2;PMVK;S100A13;MAP7;SFN;ZBTB7A;GRIA3;KLHDC10;ABCA1;OSBPL8;CD163;RABGAP1L;TCAF1;H3F3B;GADD45B;TIPARP;TMEM132A;ERLIN1;CRIM1;CDC7;PTPRD;GNAO…
Differentially Expressed Soluble Proteins In Cerebral Cortex Of 12 Wk R6/2 Mice PXD004973	170/926	5.38e-05	0.000171	0	0	1.42416	13.9999	SPARC;GDE1;ZBTB20;UBE2L6;MSMO1;FAIM2;CASC3;ZBTB22;ADARB2;1110065P20RIK;LAMP5;WDR91;DPF1;TOM1;DAG1;KIF21B;PPFIA4;EPM2A;UNC13B;ATP6V1G2;DGAT1;SLC30A3;ARL15;PHKA1;ZCRB1;ALG1;NRBP1;FRMD6;GAREM1;OBSCN;DMTF1;MORF4L2;MAPKAPK2;MAP1A;SIK3;SF1;KCTD16;6430571L13RIK;LRPAP1;ADCYAP1R1;ZFP346;NECAB3;FBLIM1;PEF1;PNP2;MRI1;HNRNPLL;ACTR3B;CACNA1E;COMMD9;ERI3;CDH22;MAP3K20;PLXNA1;OTOF;ST3GAL2;VTI1B;MAP2K6;KLHDC2;EG…
[truncated: 1,716 more rows]
