# Supplementary material for: Postnatal Conditional Deletion of Bcl11b in Striatal Projection Neurons Mimics the Transcriptional Signature of Huntington’s Disease
Source: Biomedicines. 2022 Sep 23;10(10):2377. doi: 10.3390/biomedicines10102377 (PMC9598565; doi:10.3390/biomedicines10102377)
Supplement: Supplementary file 1 [file biomedicines-10-02377-s001.zip › TableS1_ver3 later copy.xlsx]

## Sheet: Label
Label	Descritpion	Regulation pattern	Gene type	Cutoff
sample	Experiment and sample summary	N/A	N/A	N/A
summarize	Differentially expressed analysis result summary	N/A	N/A	N/A
DEG01	Differentially expressed genes by Bcl11b status in all cells	all	gene	adjust p-value<0.01
DETF01	Differentially expressed transcription factors by Bcl11b status in all cells	all	TF	adjust p-value<0.01
GO_up	GO enrichment analysis for up-regulated genes	up-regulated	gene	adjust p-value<0.01, logfoldchange > 0
GO_dn	GO enrichment analysis for down-regulated genes	down-regulated	gene	adjust p-value<0.01, logfoldchange < 0
GO_all	GO enrichment analysis for all genes	all	gene	adjust p-value<0.01
KEGG_up	KEGG enrichment analysis for up-regulated gene	up-regulated	gene	adjust p-value<0.01, logfoldchange > 0
KEGG_dn	KEGG enrichment analysis for down-regulated genes	down-regulated	gene	adjust p-value<0.01, logfoldchange < 0
KEGG_all	KEGG enrichment analysis for all genes	all	gene	adjust p-value<0.01
GO_tfup	GO enrichment analysis for up-regulated TFs	up-regulated	TF	adjust p-value<0.01, logfoldchange > 0
GO_tfdn	GO enrichment analysis for down-regulated TFs	down-regulated	TF	adjust p-value<0.01, logfoldchange < 0
GO_tfall	GO enrichment analysis for all TFs	all	TF	adjust p-value<0.01
KEGG_tfup	KEGG enrichment analysis for up-regulated TFs	up-regulated	TF	adjust p-value<0.01, logfoldchange > 0
KEGG_tfdn	KEGG enrichment analysis for down-regulated TFs	down-regulated	TF	adjust p-value<0.01, logfoldchange < 0
KEGG_tfall	KEGG enrichment analysis for all TFs	all	TF	adjust p-value<0.01

## Sheet: sample
id	cre	% Previous Aligned reads	% Aligned reads after filtered
167_S8	negative	77.65	79.1
170_S6	negative	80.64	81.7
180_S7	negative	79.7	80.3
181_S4	negative	81.11	82
166_S5	positive	79.73	81.4
177_S2	positive	79.77	81.7
178_S3	positive	80.79	82.5
179_S1	positive	80.83	82.3

## Sheet: summarize
	up	down	total
DEG	1536	1235	2771
DETF	109	178	287

## Sheet: DEG01
	Gene names (Uniprot)	baseMean	log2FoldChange	lfcSE	stat	pvalue	padj	entrez ID
Sohlh1	Spermatogenesis- and oogenesis-specific basic helix-loop-helix-containing protein 1	17.9808	-7.76513	1.20375	-6.45079	1.11265e-10	4.57645e-09	227631
Ffar3	Free fatty acid receptor 3	33.9416	-7.23828	1.38882	-5.21182	1.86996e-07	4.1759e-06	233080
Prss32	Protease, serine 32	7.39825	-5.74348	1.3658	-4.20521	2.60837e-05	0.000343032	69814
Gpx6	Glutathione peroxidase 6	233.266	-5.20091	0.789847	-6.58471	4.55785e-11	1.99695e-09	75512
Pbp2	Phosphatidylethanolamine-binding protein 2	8.6098	-5.18598	1.41755	-3.6584	0.00025379	0.00248801	76400
Gm19402	Predicted gene, 19402	7.09887	-4.37365	1.26817	-3.44878	0.00056313	0.00489903	100502831
Sec14l3	Uncharacterized protein	203.718	-4.19159	0.597909	-7.01041	2.37619e-12	1.23058e-10	380683
Wnt8b	Protein Wnt-8b	96.2288	-3.82776	0.439516	-8.70903	3.06487e-18	3.08849e-16	22423
Bsph1	Binder of sperm protein homolog 1	12.3308	-3.81455	0.813627	-4.68833	2.75447e-06	4.72796e-05	330470
E230025N22Rik	Riken cDNA E230025N22 gene	165.563	-3.77204	0.526724	-7.16132	7.99012e-13	4.51498e-11	240216
Theg	Testicular haploid expressed gene protein	13.9423	-3.57553	0.778125	-4.59506	4.32634e-06	7.04504e-05	21830
Krt15	Keratin, type I cytoskeletal 15	30.6013	-3.47101	0.642629	-5.40127	6.6171e-08	1.62472e-06	16665
Clec12a	C-type lectin domain family 12 member A	267.855	-3.09305	0.291907	-10.596	3.10903e-26	7.02728e-24	232413
Ifi27l2b	Interferon alpha-inducible protein 27-like protein 2B	32.0253	-3.04671	0.541575	-5.62565	1.8481e-08	5.07335e-07	217845
Bnipl	Bcl-2/adenovirus E1B 19 kDa-interacting protein 2-like protein	35.5124	-3.00994	0.384794	-7.82222	5.18983e-15	3.70254e-13	171388
Piwil4	Piwi-like protein 4	23.2242	-2.94677	0.645836	-4.56272	5.0495e-06	8.07153e-05	330890
Ccr6	C-C chemokine receptor type 6	30.6059	-2.72938	0.586051	-4.65724	3.20478e-06	5.38995e-05	12458
Adprhl1	[Protein ADP-ribosylarginine] hydrolase-like protein 1	24.9055	-2.69504	0.740849	-3.63777	0.00027501	0.00266792	234072
Rspo1	R-spondin-1	185.996	-2.68212	0.295099	-9.08889	1.00056e-19	1.16339e-17	192199
Slc47a2	Multidrug and toxin extrusion protein 2	13.3476	-2.59083	0.785087	-3.30005	0.000966663	0.00770559	380701
Olfr1393	Olfactory receptor	209.418	-2.58155	0.204566	-12.6196	1.64614e-36	6.86413e-34	258463
Slc4a11	Sodium bicarbonate transporter-like protein 11	162.625	-2.5208	0.30485	-8.26897	1.35124e-16	1.15476e-14	269356
Il2rb	Interleukin-2 receptor subunit beta	56.9872	-2.50509	0.319214	-7.8477	4.23739e-15	3.0683e-13	16185
Ankrd22	Ankyrin repeat domain-containing protein 22	9.06191	-2.50219	0.712514	-3.51178	0.00044512	0.00401837	52024
Tspear	Thrombospondin-type laminin G domain and EAR repeat-containing protein	97.7276	-2.49569	0.224528	-11.1153	1.05748e-28	2.87362e-26	252974
Dmkn	Dermokine	552.621	-2.44638	0.44829	-5.45713	4.83885e-08	1.22286e-06	73712
Cyp2g1	Cytochrome P450, family 2, subfamily g, polypeptide 1	13.5927	-2.43363	0.635366	-3.83028	0.000128	0.00139007	13108
Sftpc	Pulmonary surfactant-associated protein C	13.3129	-2.42886	0.584599	-4.15475	3.25648e-05	0.00041539	20389
Tpm2	Tropomyosin beta chain	329.634	-2.39884	0.222391	-10.7866	3.98283e-27	9.5371e-25	22004
Fabp4	Fatty acid-binding protein, adipocyte	35.2041	-2.28569	0.397126	-5.75558	8.63465e-09	2.54669e-07	11770
Klhl1	Kelch-like protein 1	442.84	-2.28527	0.480814	-4.75292	2.00499e-06	3.57602e-05	93688
Strit1	Sarcoplasmic/endoplasmic reticulum calcium ATPase regulator DWORF	55.7459	-2.26754	0.41642	-5.44533	5.17104e-08	1.29834e-06	102637511
Mas1	Proto-oncogene Mas	162.897	-2.26034	0.649811	-3.47845	0.000504321	0.00445146	17171
Cldn23	Claudin-23	39.2093	-2.24206	0.58305	-3.8454	0.000120354	0.00132067	71908
Myo3b	Myosin-IIIb	349.279	-2.21923	0.254456	-8.72147	2.74607e-18	2.79049e-16	329421
Sbsn	Suprabasin	223.724	-2.20286	0.455174	-4.8396	1.30098e-06	2.4278e-05	282619
Mafa	Transcription factor MafA	155.657	-2.19484	0.2152	-10.199	2.00232e-24	3.69664e-22	378435
Gm14444	Predicted gene 14444	13.552	-2.18886	0.585206	-3.74032	0.000183784	0.00188339	105244401
Ror1	Inactive tyrosine-protein kinase transmembrane receptor ROR1	208.514	-2.17493	0.238834	-9.10642	8.51487e-20	9.99671e-18	26563
Ano2	Anoctamin-2	1660.16	-2.16188	0.161254	-13.4067	5.52586e-41	2.78423e-38	243634
Gm19410	Predicted gene, 19410	2761.65	-2.14601	0.264359	-8.1178	4.74691e-16	3.87851e-14	100502846
Cdcp1	CUB domain-containing protein 1	36.6371	-2.09421	0.37964	-5.5163	3.46211e-08	8.97441e-07	109332
1700014D04Rik	RIKEN cDNA 1700014D04 gene	58.031	-2.09358	0.301074	-6.95368	3.55867e-12	1.81193e-10	102638268
Zp3r	Zona pellucida sperm-binding protein 3 receptor	34.5167	-2.02871	0.344017	-5.89712	3.69891e-09	1.17553e-07	22789
Tmem114	Transmembrane protein 114	15.3663	-2.02848	0.521786	-3.88757	0.000101253	0.00113633	74720
Vwa7	von Willebrand factor A domain-containing protein 7	129.53	-1.99634	0.260726	-7.65685	1.90555e-14	1.27661e-12	27762
Obscn	Obscurin	1150.64	-1.98387	0.501179	-3.95841	7.54499e-05	0.000875183	380698
Dazl	Deleted in azoospermia-like	577.74	-1.94786	0.141092	-13.8056	2.35926e-43	1.29679e-40	13164
Rreb1	Ras-responsive element-binding protein 1	582.572	-1.94548	0.135433	-14.3649	8.59238e-47	5.93734e-44	68750
Slco4c1	Solute carrier organic anion transporter family member 4C1	140.205	-1.94387	0.283142	-6.86536	6.63254e-12	3.27363e-10	227394
Srpx	Sushi-repeat-containing protein SRPX	26.883	-1.93029	0.496148	-3.89055	0.000100018	0.00112456	51795
Abcc12	ATP-binding cassette sub-family C member 12	300.575	-1.92331	0.127683	-15.0631	2.83045e-51	2.53535e-48	244562
Arhgef39	Rho guanine nucleotide exchange factor 39	137.393	-1.91307	0.292048	-6.55052	5.73365e-11	2.48065e-09	230098
Acvrl1	Serine/threonine-protein kinase receptor R3	1583.03	-1.87541	0.365764	-5.12737	2.93815e-07	6.32762e-06	11482
Fxyd2	Sodium/potassium-transporting ATPase subunit gamma	146.033	-1.86801	0.208215	-8.97159	2.9227e-19	3.21298e-17	11936
Plch2	1-phosphatidylinositol 4,5-bisphosphate phosphodiesterase eta-2	1076.05	-1.85417	0.15364	-12.0682	1.55456e-33	5.44884e-31	269615
Fibcd1	Fibrinogen C domain-containing protein 1	610.767	-1.84142	0.201628	-9.13278	6.6764e-20	7.99351e-18	98970
Nxf7	Nuclear RNA export factor 7	116.702	-1.82733	0.253335	-7.2131	5.46938e-13	3.15697e-11	170722
Ankk1	Ankyrin repeat and protein kinase domain-containing protein 1	150.624	-1.80068	0.266875	-6.74727	1.50654e-11	7.06117e-10	244859
5730507C01Rik	RIKEN cDNA 5730507C01 gene	19.2893	-1.79455	0.484659	-3.70271	0.00021331	0.00213619	236366
Cyp2a5	Cytochrome P450 2A5	187.28	-1.79055	0.228235	-7.84522	4.322e-15	3.11094e-13	13087
Retn	Resistin	95.8843	-1.78944	0.299398	-5.97679	2.27584e-09	7.53989e-08	57264
Tmem154	Transmembrane protein 154	20.6517	-1.7874	0.451525	-3.95858	7.53977e-05	0.000874997	320782
Arhgdib	Rho GDP-dissociation inhibitor 2	334.62	-1.77334	0.23856	-7.43353	1.05738e-13	6.55713e-12	11857
Fgf11	Fibroblast growth factor 11	810.537	-1.76652	0.172961	-10.2134	1.72621e-24	3.2363e-22	14166
Syt2	Synaptotagmin-2	1873.19	-1.73028	0.306839	-5.63905	1.70993e-08	4.76435e-07	20980
Nod2	Nucleotide-binding oligomerization domain-containing protein 2	124.543	-1.70269	0.241659	-7.04583	1.84359e-12	9.79473e-11	257632
Myo15b	Myosin XVB	24.9345	-1.68362	0.439021	-3.83495	0.00012559	0.00136933	217328
Irak3	Interleukin-1 receptor-associated kinase 3	104.845	-1.6573	0.320777	-5.16651	2.38506e-07	5.20345e-06	73914
Gm4779	Predicted gene 4779	31.6485	-1.65479	0.375423	-4.4078	1.04425e-05	0.000153247	102634296
Fblim1	Filamin-binding LIM protein 1	44.0661	-1.64523	0.384071	-4.28366	1.83847e-05	0.000253286	74202
Ptpn7	Tyrosine-protein phosphatase non-receptor type 7	413.763	-1.63197	0.142609	-11.4437	2.52876e-30	7.36844e-28	320139
Cd4	T-cell surface glycoprotein CD4	1276.67	-1.63014	0.146532	-11.1248	9.50103e-29	2.61116e-26	12504
Gdf7	Growth/differentiation factor 7	26.4535	-1.60878	0.471108	-3.41489	0.000638088	0.00542621	238057
Rerg	Ras-related and estrogen-regulated growth inhibitor	474.146	-1.60139	0.151392	-10.5777	3.77959e-26	8.46383e-24	232441
Pitpnm3	Membrane-associated phosphatidylinositol transfer protein 3	1047.49	-1.6006	0.406229	-3.94015	8.14317e-05	0.000935594	327958
Stc1	Stanniocalcin-1	104.066	-1.59968	0.284534	-5.62209	1.88657e-08	5.16723e-07	20855
Fam90a1b	Family with sequence similarity 90, member A1B	27.7951	-1.58841	0.375614	-4.22884	2.34904e-05	0.000312839	631145
9030624G23Rik	RIKEN cDNA 9030624G23 gene	52.2251	-1.58764	0.320965	-4.94645	7.55808e-07	1.47651e-05	66808
Synpo2	Synaptopodin-2	581.277	-1.56479	0.153893	-10.168	2.75375e-24	5.00747e-22	118449
Papln	Papilin	1049.71	-1.53564	0.161052	-9.53508	1.49772e-21	2.09724e-19	170721
Ppef2	Serine/threonine-protein phosphatase with EF-hands 2	123.549	-1.53545	0.215942	-7.11049	1.15633e-12	6.3559e-11	19023
Ccdc110	Coiled-coil domain-containing protein 110	24.5086	-1.53401	0.361381	-4.24485	2.18737e-05	0.000293898	212392
Pxdn	Peroxidasin homolog	3004.57	-1.52221	0.144746	-10.5164	7.26148e-26	1.55415e-23	69675
Htr1b	5-hydroxytryptamine receptor 1B	2074.89	-1.51552	0.129644	-11.6899	1.43596e-31	4.51021e-29	15551
Sptssb	Serine palmitoyltransferase small subunit B	29.3618	-1.51476	0.413608	-3.6623	0.000249961	0.00245539	66183
Cyp2s1	Cytochrome P450 2S1	236.492	-1.51304	0.178616	-8.47093	2.43445e-17	2.18874e-15	74134
Lipo2	Lipase	29.4664	-1.49527	0.413194	-3.61881	0.000295961	0.00283703	101055671
Kremen2	Kremen protein 2	117.33	-1.49462	0.250086	-5.97642	2.2809e-09	7.54632e-08	73016
Plk5	Inactive serine/threonine-protein kinase PLK5	1366.88	-1.48048	0.126848	-11.6713	1.78733e-31	5.54187e-29	216166
Dusp1	Dual specificity protein phosphatase 1	520.735	-1.47877	0.164135	-9.00947	2.07064e-19	2.32923e-17	19252
Iqgap2	Ras GTPase-activating-like protein IQGAP2	1347.3	-1.47398	0.314224	-4.69084	2.72089e-06	4.68282e-05	544963
Slc39a5	Zinc transporter ZIP5	38.07	-1.46998	0.40901	-3.594	0.000325642	0.00308124	72002
Mcub	Calcium uniporter regulatory subunit MCUb, mitochondrial	122.295	-1.46527	0.201236	-7.28134	3.30526e-13	1.95447e-11	66815
Mei4	Meiosis-specific protein MEI4	186.589	-1.46167	0.204412	-7.15062	8.6388e-13	4.83633e-11	75033
Casq2	Calsequestrin-2	235.511	-1.45104	0.272179	-5.3312	9.75635e-08	2.327e-06	12373
Musk	Muscle, skeletal receptor tyrosine-protein kinase	443.247	-1.43936	0.106543	-13.5096	1.37287e-41	7.06442e-39	18198
Traip	E3 ubiquitin-protein ligase TRAIP	1743.56	-1.43526	0.13961	-10.2805	8.62896e-25	1.68299e-22	22036
Bcl11b	B-cell lymphoma/leukemia 11B	14498.8	-1.43049	0.130734	-10.942	7.25952e-28	1.86778e-25	58208
Cyp11a1	Cholesterol side-chain cleavage enzyme, mitochondrial	35.7511	-1.43033	0.422475	-3.38559	0.000710263	0.00593768	13070
Spink8	Serine protease inhibitor Kazal-type 8	90.1565	-1.42641	0.424978	-3.35644	0.000789526	0.00648898	78709
Coch	Cochlin	4113.9	-1.41732	0.114805	-12.3454	5.15503e-35	2.01088e-32	12810
Gm3604	Predicted gene 3604	135.093	-1.40928	0.210358	-6.69943	2.09237e-11	9.65725e-10	100041979
Smpdl3b	Acid sphingomyelinase-like phosphodiesterase 3b	577.836	-1.37141	0.119351	-11.4905	1.47192e-30	4.34126e-28	100340
Ddit4l	DNA damage-inducible transcript 4-like protein	690.432	-1.3714	0.122556	-11.19	4.56631e-29	1.28414e-26	73284
Adamtsl5	ADAMTS-like 5	212.863	-1.36774	0.251646	-5.4352	5.47343e-08	1.36892e-06	66548
Dsg1c	Desmoglein-1-gamma	142.176	-1.36747	0.265704	-5.14658	2.65278e-07	5.75403e-06	211924
Pif1	ATP-dependent DNA helicase PIF1	63.536	-1.36155	0.273199	-4.98374	6.23668e-07	1.24041e-05	208084
Rapsn	43 kDa receptor-associated protein of the synapse	53.7843	-1.3579	0.290351	-4.67677	2.91432e-06	4.97058e-05	19400
Rgs14	Regulator of G-protein signaling 14	3020.93	-1.35263	0.156903	-8.62077	6.65026e-18	6.53808e-16	51791
Ryr1	Ryanodine receptor 1	2410.52	-1.34826	0.128185	-10.5181	7.13176e-26	1.54001e-23	20190
Dkk2	Dickkopf-related protein 2	34.2762	-1.34559	0.333201	-4.03837	5.38245e-05	0.000650872	56811
Prrt4	Proline-rich transmembrane protein 4	119.189	-1.33061	0.287886	-4.62201	3.80039e-06	6.28956e-05	101359
Pou6f2	POU domain, class 6, transcription factor 2	40.0435	-1.31698	0.370639	-3.55326	0.000380495	0.00349628	218030
Hrk	Activator of apoptosis harakiri	2399.07	-1.31697	0.127873	-10.299	7.1197e-25	1.39992e-22	12123
Slc26a5	Prestin	36.7734	-1.31103	0.315501	-4.15538	3.24746e-05	0.000414458	80979
Klc3	Kinesin light chain 3	237.877	-1.30768	0.283934	-4.60558	4.11315e-06	6.75791e-05	232943
Arid3b	AT-rich interactive domain-containing protein 3B	267.238	-1.30148	0.145289	-8.95783	3.31138e-19	3.62379e-17	56380
Trib3	Tribbles homolog 3	114.518	-1.29746	0.318557	-4.07293	4.64255e-05	0.000568795	228775
Glis1	Zinc finger protein GLIS1	32.4959	-1.27101	0.316849	-4.01142	6.03549e-05	0.000718702	230587
Ust	Uronyl 2-sulfotransferase	936.128	-1.26375	0.148847	-8.49021	2.0626e-17	1.86134e-15	338362
Ddx11	ATP-dependent DNA helicase DDX11	246.881	-1.25843	0.170989	-7.35971	1.84307e-13	1.11997e-11	320209
Itga5	Integrin alpha-5	480.548	-1.25591	0.142326	-8.82418	1.10266e-18	1.15947e-16	16402
Gpr12	G-protein coupled receptor 12	1639.96	-1.25238	0.117828	-10.6289	2.18643e-26	4.98856e-24	14738
Syt10	Synaptotagmin-10	479.522	-1.25093	0.345459	-3.62107	0.000293392	0.00281352	54526
Itga9	Integrin alpha-9	1816.5	-1.24643	0.130583	-9.54515	1.35908e-21	1.92219e-19	104099
1700001O22Rik	RIKEN cDNA 1700001O22 gene	142.033	-1.24294	0.264752	-4.69474	2.6695e-06	4.61486e-05	73598
Cfap47	Cilia and flagella-associated protein 47	300.073	-1.23798	0.207973	-5.95259	2.63925e-09	8.66083e-08	636104
Crispld1	Cysteine-rich secretory protein LCCL domain-containing 1	610.77	-1.21936	0.125214	-9.73821	2.07174e-22	3.23259e-20	83691
Prmt8	Protein arginine N-methyltransferase 8	1832.75	-1.20233	0.0924065	-13.0113	1.05592e-38	4.81839e-36	381813
Nexn	Nexilin	702.34	-1.20144	0.141371	-8.49848	1.92087e-17	1.75307e-15	68810
Agbl1	Cytosolic carboxypeptidase 4	31.2756	-1.19597	0.359352	-3.32812	0.000874345	0.00708647	244071
Pcdha1	Protocadherin alpha 1	70.2727	-1.17822	0.318346	-3.70106	0.000214705	0.00214749	116731
Gm9925	Predicted gene 9925	163.335	-1.17579	0.184422	-6.37557	1.82285e-10	7.21533e-09	433202
Baz1a	Bromodomain adjacent to zinc finger domain protein 1A	458.11	-1.15968	0.230108	-5.0397	4.6626e-07	9.59702e-06	217578
Tll1	Tolloid-like protein 1	195.844	-1.15898	0.233636	-4.96064	7.02628e-07	1.37819e-05	21892
Hbegf	Proheparin-binding EGF-like growth factor	1408.53	-1.13968	0.109642	-10.3945	2.62601e-25	5.33698e-23	15200
D930048N14Rik	RIKEN cDNA D930048N14 gene	59.9572	-1.13897	0.319948	-3.55987	0.000371041	0.00343291	97775
Arg2	Arginase-2, mitochondrial	388.714	-1.1356	0.167198	-6.79195	1.10626e-11	5.31905e-10	11847
Col14a1	Collagen alpha-1(XIV) chain	109.57	-1.11333	0.248847	-4.47396	7.67838e-06	0.000117088	12818
Rbp4	Retinol-binding protein 4	240.957	-1.11204	0.222234	-5.0039	5.61818e-07	1.13135e-05	19662
Dgat2l6	Diacylglycerol O-acyltransferase 2-like protein 6	70.0215	-1.10504	0.240088	-4.60263	4.17197e-06	6.84525e-05	668257
Rasgrp2	RAS guanyl-releasing protein 2	7750.91	-1.09693	0.129803	-8.45078	2.89372e-17	2.59202e-15	19395
Fancb	Fanconi anemia group B protein homolog	432.969	-1.09581	0.148447	-7.38179	1.56171e-13	9.51385e-12	237211
Samd5	Sterile alpha motif domain-containing protein 5	1553.25	-1.0838	0.166898	-6.4938	8.36973e-11	3.53885e-09	320825
Syt9	Synaptotagmin-9	479.614	-1.07792	0.158529	-6.79954	1.04952e-11	5.0664e-10	60510
Pdp1	[Pyruvate dehydrogenase [acetyl-transferring]]-phosphatase 1, mitochondrial	12131.7	-1.07259	0.116404	-9.21436	3.13131e-20	3.96496e-18	381511
Selenov	cDNA sequence BC089491	76.2363	-1.06916	0.295179	-3.62207	0.000292253	0.0028037	280621
Snorc	Protein SNORC	60.509	-1.05781	0.2545	-4.1564	3.23295e-05	0.000413042	73234
Chil5	Chitinase-like 5	128.191	-1.05732	0.245317	-4.31	1.63255e-05	0.000227832	229687
Col26a1	Collagen alpha-1(XXVI) chain	140.195	-1.05377	0.182124	-5.78602	7.20723e-09	2.17069e-07	140709
Cys1	Cystin-1	207.17	-1.04492	0.176368	-5.92465	3.12962e-09	1.01461e-07	12879
Vamp9	Vesicle-associated membrane protein 9	46.6652	-1.03533	0.301399	-3.43508	0.000592373	0.00510826	102639650
Lrrc10b	Leucine-rich repeat-containing 10B	10799.9	-1.03067	0.137245	-7.50977	5.92336e-14	3.77985e-12	278795
Ackr2	Atypical chemokine receptor 2	245.508	-1.02845	0.224678	-4.57743	4.70725e-06	7.5846e-05	59289
Kcnu1	Potassium channel subfamily U member 1	71.6954	-1.02789	0.29112	-3.53082	0.000414278	0.00377375	16532
Gdpd5	Glycerophosphodiester phosphodiesterase domain-containing protein 5	2083.19	-1.02668	0.144632	-7.09858	1.2605e-12	6.86935e-11	233552
2900026A02Rik	Uncharacterized protein KIAA1671	720.398	-1.02164	0.157032	-6.50594	7.72094e-11	3.29913e-09	243219
Wnt1	Proto-oncogene Wnt-1	69.6761	-1.01933	0.276458	-3.68711	0.000226811	0.00225089	22408
Pnp2	Purine nucleoside phosphorylase	176.512	-1.01684	0.248307	-4.09509	4.22011e-05	0.000521796	667034
Zbtb8a	Zinc finger and BTB domain-containing protein 8A	427.998	-1.01231	0.147808	-6.84885	7.44483e-12	3.6448e-10	73680
Sgpp2	Sphingosine-1-phosphate phosphatase 2	510.145	-1.00655	0.157776	-6.37966	1.77487e-10	7.04848e-09	433323
Mpp6	Protein PALS2	4871.82	-1.00597	0.0717883	-14.013	1.29828e-44	7.47591e-42	56524
Mfsd8	Major facilitator superfamily domain-containing protein 8	590.665	-1.00494	0.0927958	-10.8296	2.49297e-27	6.15229e-25	72175
Arpp21	cAMP-regulated phosphoprotein 21	57258.4	-1.00382	0.0912893	-10.9961	3.99137e-28	1.03797e-25	74100
Grem2	Gremlin-2	766.093	-0.999559	0.139367	-7.17213	7.384e-13	4.19207e-11	23893
Oxgr1	2-oxoglutarate receptor 1	41.0559	-0.998157	0.285342	-3.49811	0.000468572	0.00418788	239283
Fam102b	Protein FAM102B	10661.2	-0.996895	0.097437	-10.2312	1.43766e-24	2.7164e-22	329739
Nt5e	5'-nucleotidase	865.251	-0.996182	0.163465	-6.09418	1.10002e-09	3.85007e-08	23959
Pnmt	Phenylethanolamine N-methyltransferase	96.79	-0.994428	0.225186	-4.41603	1.00532e-05	0.000148213	18948
Exph5	Exophilin-5	312.082	-0.993977	0.23247	-4.27572	1.90518e-05	0.000261354	320051
Chrna4	Neuronal acetylcholine receptor subunit alpha-4	302.735	-0.982818	0.265893	-3.69629	0.000218776	0.00218099	11438
Plcxd1	PI-PLC X domain-containing protein 1	848.59	-0.976143	0.157704	-6.18972	6.027e-10	2.20853e-08	403178
Gcnt2	N-acetyllactosaminide beta-1,6-N-acetylglucosaminyl-transferase	2936.84	-0.973846	0.0949009	-10.2617	1.04827e-24	1.99626e-22	14538
1810020O05Rik	Riken cDNA 1810020O05 gene	257.736	-0.972454	0.170311	-5.70987	1.13066e-08	3.24376e-07	613264
Gstm6	Glutathione S-transferase Mu 6	239.454	-0.969768	0.239101	-4.05589	4.99448e-05	0.000608521	14867
Abi3bp	ABI family member 3-binding protein	415.95	-0.967935	0.20273	-4.77449	1.80159e-06	3.27113e-05	320712
Slc26a10	Solute carrier family 26 member 10	524.208	-0.965312	0.157024	-6.14756	7.86848e-10	2.82763e-08	216441
Cd302	CD302 antigen	982.117	-0.960834	0.0959451	-10.0144	1.31737e-23	2.29214e-21	66205
Ptpn5	Tyrosine-protein phosphatase non-receptor type 5	16198.7	-0.954443	0.0839102	-11.3746	5.59718e-30	1.61152e-27	19259
Tbc1d8	TBC1 domain family member 8	5241.55	-0.954432	0.0891715	-10.7033	9.81897e-27	2.28338e-24	54610
Ehbp1l1	EH domain-binding protein 1-like protein 1	2086.19	-0.953353	0.121652	-7.83675	4.62374e-15	3.31825e-13	114601
Ccdc42	Coiled-coil domain-containing protein 42	83.5281	-0.952327	0.239927	-3.96924	7.21023e-05	0.000840383	276920
Neto2	Neuropilin and tolloid-like protein 2	10299.8	-0.949244	0.0977987	-9.7061	2.83999e-22	4.34716e-20	74513
Gipc2	PDZ domain-containing protein GIPC2	233.439	-0.948378	0.206546	-4.59161	4.39837e-06	7.14403e-05	54120
Mmp23	Matrix metalloproteinase-23	67.4213	-0.939447	0.242995	-3.86612	0.000110581	0.00122399	26561
Sptbn5	Spectrin beta, non-erythrocytic 5	273.101	-0.937068	0.139547	-6.71509	1.87953e-11	8.72485e-10	640524
Npl	N-acetylneuraminate lyase	386.821	-0.936377	0.186467	-5.02167	5.12234e-07	1.04543e-05	74091
4930447C04Rik	Protein SIX6OS1	392.735	-0.935968	0.206099	-4.54135	5.58943e-06	8.80668e-05	75801
Abcc8	ATP-binding cassette, sub-family C	730.044	-0.932351	0.136025	-6.85425	7.16852e-12	3.51665e-10	20927
Eya1	Eyes absent homolog 1	370.863	-0.928064	0.185847	-4.9937	5.92349e-07	1.18592e-05	14048
Tmprss6	Transmembrane protease serine 6	220.568	-0.92802	0.186827	-4.96727	6.79004e-07	1.33836e-05	71753
Ttc34	Tetratricopeptide repeat protein 34	198.702	-0.917871	0.185013	-4.96112	7.00873e-07	1.37586e-05	242800
Apol8	Apolipoprotein L 8	199.144	-0.915224	0.159828	-5.72631	1.0264e-08	2.96577e-07	239552
Srgap1	SLIT-ROBO Rho GTPase-activating protein 1	1733.27	-0.914735	0.0838074	-10.9147	9.80206e-28	2.4954e-25	117600
Ankrd35	Ankyrin repeat domain 35	688.753	-0.911012	0.167729	-5.43145	5.58991e-08	1.3923e-06	213121
Slc16a7	Monocarboxylate transporter 2	1477.25	-0.908613	0.111184	-8.17216	3.02922e-16	2.52626e-14	20503
Ankdd1a	Ankyrin repeat and death domain-containing 1A	341.671	-0.908104	0.174861	-5.19328	2.06616e-07	4.56765e-06	330963
Mroh7	Maestro heat-like repeat-containing protein family member 7	329.94	-0.903336	0.208667	-4.32907	1.49739e-05	0.000211162	381538
Msantd1	Myb/SANT-like DNA-binding domain-containing protein 1	162.915	-0.898212	0.170559	-5.26627	1.39224e-07	3.20679e-06	403174
Rnf122	RING finger protein 122	315.646	-0.888347	0.117906	-7.53434	4.90793e-14	3.14017e-12	68867
Fosb	Protein fosB	472.817	-0.885986	0.163903	-5.40556	6.46054e-08	1.59274e-06	14282
Fbxo32	F-box only protein 32	414.557	-0.878981	0.139869	-6.28431	3.29318e-10	1.24641e-08	67731
Gxylt2	Glucoside xylosyltransferase 2	69.4764	-0.875722	0.251111	-3.48739	0.00048776	0.00432739	232313
Stk26	Serine/threonine-protein kinase 26	2977.26	-0.868606	0.0888243	-9.77892	1.38688e-22	2.20669e-20	70415
Samd15	Sterile alpha motif domain-containing protein 15	143.866	-0.854478	0.152911	-5.58807	2.29602e-08	6.15781e-07	238333
Cenpj	Centromere protein J	240.899	-0.851242	0.150919	-5.64037	1.69681e-08	4.73326e-07	219103
Tnfrsf9	Tumor necrosis factor receptor superfamily member 9	56.0925	-0.849676	0.25006	-3.39789	0.000679086	0.00571259	21942
Fmnl1	Formin-like protein 1	470.058	-0.84726	0.141343	-5.99437	2.04281e-09	6.84283e-08	57778
Zfp566	Zinc finger protein 566	105.571	-0.843082	0.210529	-4.00459	6.2125e-05	0.000737252	72556
Chia1	Acidic mammalian chitinase	284.916	-0.840168	0.166809	-5.03669	4.73641e-07	9.74065e-06	81600
AI593442	Uncharacterized protein C11orf87 homolog	9511.44	-0.837957	0.0968627	-8.65098	5.10611e-18	5.06112e-16	330941
Cnnm2	Metal transporter CNNM2	2337.78	-0.837262	0.0802588	-10.432	1.77076e-25	3.6293e-23	94219
Ptcd1	Pentatricopeptide repeat-containing protein 1, mitochondrial	1901.06	-0.833177	0.0838921	-9.93153	3.03571e-23	5.20699e-21	71799
Kcnk2	Potassium channel subfamily K member 2	2460.54	-0.832038	0.12424	-6.69703	2.12694e-11	9.77947e-10	16526
Crybg3	Beta/gamma crystallin domain-containing protein 3	4470.62	-0.831864	0.0921279	-9.02944	1.72548e-19	1.95919e-17	224273
Cited4	Cbp/p300-interacting transactivator 4	220.517	-0.830966	0.149426	-5.56106	2.68135e-08	7.07951e-07	56222
Arl5c	ADP-ribosylation factor-like protein 5C	302.756	-0.830175	0.236544	-3.50959	0.000448792	0.00404247	217151
Klf2	Krueppel-like factor 2	56.4995	-0.826712	0.241346	-3.42542	0.000613848	0.00525333	16598
Gpr83	Probable G-protein coupled receptor 83	3653.93	-0.820574	0.0883389	-9.28893	1.55852e-20	2.01565e-18	14608
Cenpp	Centromere protein P	111.114	-0.820328	0.23257	-3.52724	0.000419923	0.00381942	66336
Dpy19l3	Probable C-mannosyltransferase DPY19L3	3138.5	-0.819901	0.107231	-7.64614	2.07107e-14	1.37607e-12	233115
Kif27	Kinesin-like protein KIF27	956.489	-0.816282	0.12822	-6.36626	1.93687e-10	7.62918e-09	75050
S100a10	Protein S100-A10	568.912	-0.814213	0.159264	-5.11236	3.18153e-07	6.77334e-06	20194
Tmem267	Transmembrane protein 267	668.43	-0.811179	0.203096	-3.99406	6.49504e-05	0.00076402	633640
Shcbp1l	Testicular spindle-associated protein SHCBP1L	203.812	-0.80733	0.149523	-5.39938	6.68732e-08	1.63863e-06	71836
Zfp831	Zinc finger protein 831	1423.13	-0.807038	0.135641	-5.94979	2.68481e-09	8.78648e-08	100043757
Gpr63	Probable G-protein coupled receptor 63	228.191	-0.806144	0.141391	-5.70153	1.18736e-08	3.39437e-07	81006
Ezh2	Histone-lysine N-methyltransferase EZH2	1035.87	-0.805455	0.127585	-6.31307	2.73561e-10	1.05688e-08	14056
Tnfrsf25	Tumor necrosis factor receptor superfamily, member 25	116.254	-0.800399	0.204632	-3.91141	9.17604e-05	0.00104336	85030
Sfn	14-3-3 protein sigma	86.4604	-0.798629	0.217791	-3.66695	0.000245458	0.00241415	55948
Fgf3	Fibroblast growth factor 3	343.485	-0.798622	0.15199	-5.25445	1.48466e-07	3.39588e-06	14174
Lrrc1	Leucine-rich repeat-containing protein 1	1577.64	-0.795725	0.087194	-9.12591	7.11337e-20	8.43318e-18	214345
Sycp2	Synaptonemal complex protein 2	354	-0.795622	0.153019	-5.19949	1.9984e-07	4.43814e-06	320558
Pla2g4b	Cytosolic phospholipase A2 beta	79.2637	-0.794984	0.2122	-3.74639	0.000179401	0.00184552	211429
Lhpp	Phospholysine phosphohistidine inorganic pyrophosphate phosphatase	732.193	-0.792598	0.0885136	-8.95454	3.41152e-19	3.71656e-17	76429
Xrra1	X-ray radiation resistance-associated protein 1	155.211	-0.792207	0.200726	-3.9467	7.92351e-05	0.000912537	446101
E2f1	Transcription factor E2F1	223.188	-0.790776	0.187445	-4.21872	2.45696e-05	0.000325597	13555
4921524J17Rik	UPF0547 protein C16orf87 homolog	405.825	-0.790239	0.136248	-5.79999	6.63208e-09	2.01251e-07	66714
Ppp2r2a	Serine/threonine-protein phosphatase 2A 55 kDa regulatory subunit B alpha isoform	5203.19	-0.789159	0.0748939	-10.537	5.83146e-26	1.28213e-23	71978
Ccno	Cyclin-O	229.699	-0.78776	0.134896	-5.83975	5.2278e-09	1.60858e-07	218630
Rap1gap	Rap1 GTPase-activating protein 1	17984.5	-0.786067	0.0918139	-8.56153	1.1138e-17	1.06053e-15	110351
Syndig1l	Synapse differentiation-inducing gene protein 1-like	2789.42	-0.777609	0.121629	-6.3933	1.62348e-10	6.50063e-09	627191
Cep128	Centrosomal protein of 128 kDa	806.582	-0.77722	0.102615	-7.57411	3.61611e-14	2.34466e-12	75216
Clspn	Claspin	1008.37	-0.776806	0.145019	-5.35659	8.48056e-08	2.04489e-06	269582
Mlip	Muscular LMNA-interacting protein	431.97	-0.776235	0.1488	-5.21663	1.82211e-07	4.08034e-06	69642
Lzts3	Leucine zipper putative tumor suppressor 3	25804.6	-0.775604	0.0996402	-7.78404	7.02423e-15	4.92409e-13	241638
Mctp1	Multiple C2 and transmembrane domain-containing protein 1	15400.8	-0.775407	0.12413	-6.24675	4.19092e-10	1.56658e-08	78771
Ablim2	Actin-binding LIM protein 2	8086.47	-0.770671	0.0890419	-8.65516	4.92238e-18	4.89908e-16	231148
Angptl6	Angiopoietin-related protein 6	423.796	-0.768899	0.127697	-6.02129	1.73028e-09	5.86914e-08	70726
Cttnbp2	Cortactin-binding protein 2	7279.61	-0.765601	0.0756932	-10.1145	4.76267e-24	8.4695e-22	30785
Fcho1	F-BAR domain only protein 1	3819.35	-0.759999	0.11885	-6.39459	1.60976e-10	6.45639e-09	74015
Fam241a	Uncharacterized protein FAM241A	531.475	-0.757956	0.104257	-7.27007	3.59308e-13	2.11432e-11	70617
Slc16a13	Monocarboxylate transporter 13	155.118	-0.757637	0.191607	-3.95411	7.6819e-05	0.000889358	69309
Ripor2	Rho family-interacting cell polarization regulator 2	5445.35	-0.753515	0.103515	-7.27928	3.35615e-13	1.97972e-11	193385
Kcnip4	Kv channel-interacting protein 4	1278.49	-0.751215	0.123592	-6.07816	1.21568e-09	4.21221e-08	80334
N4bp3	NEDD4-binding protein 3	722.41	-0.74865	0.141353	-5.29633	1.18156e-07	2.76096e-06	212706
Cnst	Consortin	7730.43	-0.746883	0.0793504	-9.41247	4.84601e-21	6.4396e-19	226744
Psmc3ip	Homologous-pairing protein 2 homolog	250.834	-0.744384	0.140606	-5.29412	1.19592e-07	2.78644e-06	19183
Abcd2	ATP-binding cassette sub-family D member 2	2831.24	-0.74027	0.0954132	-7.75857	8.5893e-15	5.9352e-13	26874
Slc9a2	Sodium/hydrogen exchanger	665.363	-0.738518	0.134623	-5.48582	4.11552e-08	1.05662e-06	226999
Fra10ac1	Protein FRA10AC1 homolog	590.725	-0.738182	0.100546	-7.3417	2.10895e-13	1.27195e-11	70567
Tmem44	Transmembrane protein 44	2664.5	-0.735198	0.124087	-5.92488	3.12528e-09	1.01456e-07	224090
Dcc	Netrin receptor DCC	3629.28	-0.734442	0.085609	-8.57903	9.56771e-18	9.18235e-16	13176
Ptk7	Inactive tyrosine-protein kinase 7	1124.88	-0.734211	0.106943	-6.86544	6.62884e-12	3.27363e-10	71461
Ccdc88b	Coiled-coil domain-containing protein 88B	323.973	-0.731151	0.160157	-4.56521	4.98999e-06	7.98695e-05	78317
Asb11	Ankyrin repeat and SOCS box protein 11	462.906	-0.730521	0.128775	-5.67286	1.40432e-08	3.96769e-07	68854
Per2	Period circadian protein homolog 2	1589.88	-0.730508	0.0984961	-7.41661	1.20154e-13	7.35677e-12	18627
Hvcn1	Voltage-gated hydrogen channel 1	192.296	-0.730047	0.18358	-3.97672	6.98718e-05	0.000816747	74096
Slc16a6	Monocarboxylate transporter 7	639.771	-0.729921	0.150474	-4.8508	1.22966e-06	2.31254e-05	104681
Crocc	Rootletin	6124.8	-0.729526	0.115342	-6.32488	2.53427e-10	9.85392e-09	230872
Asb18	Ankyrin repeat and SOCS box protein 18	133.631	-0.729224	0.219258	-3.32587	0.000881444	0.00712729	208372
Pld5	Inactive phospholipase D5	697.347	-0.729014	0.147644	-4.93765	7.90689e-07	1.53597e-05	319455
Tnfaip8l1	Tumor necrosis factor alpha-induced protein 8-like protein 1	309.156	-0.728595	0.143583	-5.07439	3.88743e-07	8.133e-06	66443
Ippk	Inositol-pentakisphosphate 2-kinase	3185.6	-0.727565	0.0819707	-8.87591	6.93661e-19	7.32585e-17	75678
Plxnd1	Plexin-D1	4233.06	-0.726423	0.0975369	-7.44767	9.50023e-14	5.90651e-12	67784
Gpr6	G-protein coupled receptor 6	6273.63	-0.725571	0.0743373	-9.76053	1.66287e-22	2.62852e-20	140741
BC055324	Uncharacterized protein C1orf112 homolog	254.011	-0.724497	0.136373	-5.31262	1.08058e-07	2.54965e-06	381306
Zdhhc23	Palmitoyltransferase ZDHHC23	1062.83	-0.719925	0.0774905	-9.29049	1.53586e-20	1.99703e-18	332175
Lingo3	Leucine-rich repeat and immunoglobulin-like domain-containing nogo receptor-interacting protein 3	5037.42	-0.719364	0.0965779	-7.44854	9.43781e-14	5.88282e-12	237403
Setd1b	Histone-lysine N-methyltransferase SETD1B	284.611	-0.717219	0.129351	-5.54477	2.94345e-08	7.72096e-07	208043
Jup	Junction plakoglobin	2119.96	-0.71595	0.0742164	-9.64679	5.07189e-22	7.47949e-20	16480
Arhgap10	Rho GTPase-activating protein 10	7677.32	-0.714686	0.118114	-6.05081	1.44116e-09	4.92294e-08	78514
Plxdc1	Plexin domain-containing protein 1	245.003	-0.713731	0.207767	-3.43525	0.000592013	0.00510804	72324
Egr4	Early growth response protein 4	401.236	-0.71269	0.183198	-3.89027	0.000100134	0.00112535	13656
Gabrd	Gamma-aminobutyric acid receptor subunit delta	8668.92	-0.711948	0.0828353	-8.59475	8.34485e-18	8.07281e-16	14403
Pradc1	Protease-associated domain-containing protein 1	412.174	-0.711619	0.137791	-5.16447	2.41124e-07	5.25367e-06	73327
Ccdc92b	Coiled-coil domain-containing 92B	923.839	-0.710454	0.123421	-5.75633	8.59615e-09	2.54154e-07	432582
Gm43951	Predicted gene, 43951	552.431	-0.706432	0.153741	-4.59494	4.32869e-06	7.04504e-05	NA
Rgs20	Regulator of G-protein signaling 20	1370.47	-0.706213	0.0716251	-9.85985	6.21404e-23	1.01545e-20	58175
Cntnap5b	Contactin-associated protein like 5-2	2111.82	-0.705943	0.112212	-6.29118	3.15058e-10	1.19431e-08	241175
Ppp1ca	Serine/threonine-protein phosphatase PP1-alpha catalytic subunit	9686.23	-0.705723	0.077677	-9.08536	1.0336e-19	1.19606e-17	19045
Spred2	Sprouty-related, EVH1 domain-containing protein 2	1282.49	-0.701935	0.111433	-6.29919	2.99204e-10	1.14136e-08	114716
Gba2	Non-lysosomal glucosylceramidase	2548.1	-0.700928	0.0997579	-7.02629	2.12095e-12	1.11029e-10	230101
Raver2	Ribonucleoprotein PTB-binding 2	1162.72	-0.700001	0.124356	-5.62899	1.81266e-08	4.98738e-07	242570
Ptpro	Receptor-type tyrosine-protein phosphatase O	1629.41	-0.698238	0.0876327	-7.96778	1.6155e-15	1.21716e-13	19277
Camkv	CaM kinase-like vesicle-associated protein	54585	-0.697859	0.10107	-6.90474	5.02957e-12	2.51323e-10	235604
Myo5b	Unconventional myosin-Vb	3907.38	-0.696063	0.0887156	-7.846	4.29507e-15	3.10079e-13	17919
Ttc22	Tetratricopeptide repeat protein 22	165.303	-0.696029	0.157544	-4.41799	9.96247e-06	0.000147185	230576
Krt10	Keratin, type I cytoskeletal 10	770.917	-0.691645	0.109173	-6.33533	2.36827e-10	9.23814e-09	16661
Tcf7	Transcription factor 7	242.614	-0.688682	0.187723	-3.6686	0.000243879	0.00240058	21414
Tiam2	Rho guanine nucleotide exchange factor TIAM2	8322.68	-0.688591	0.0860732	-8.00006	1.24359e-15	9.51777e-14	24001
Muc15	Mucin-15	315.552	-0.687219	0.153615	-4.47364	7.68991e-06	0.00011719	269328
Adamts2	A disintegrin and metalloproteinase with thrombospondin motifs 2	264.626	-0.684998	0.19133	-3.5802	0.000343333	0.00321468	216725
Ranbp17	Ran-binding protein 17	1356.55	-0.683272	0.146619	-4.66018	3.1593e-06	5.32087e-05	66011
Acy1	Aminoacylase-1	1707.18	-0.68203	0.100593	-6.78011	1.2008e-11	5.73942e-10	109652
Skap2	Src kinase-associated phosphoprotein 2	1534.5	-0.681646	0.123247	-5.53074	3.18888e-08	8.31743e-07	54353
Zfp804a	Zinc finger protein 804A	589.195	-0.681118	0.125086	-5.44519	5.17511e-08	1.29834e-06	241514
Pfkfb3	6-phosphofructo-2-kinase	1653.27	-0.678752	0.103033	-6.58774	4.46564e-11	1.9601e-09	170768
Xkrx	XK-related protein 2	84.2263	-0.677992	0.203883	-3.3254	0.000882915	0.0071368	331524
Myh7b	Myosin-7B	402.362	-0.677763	0.111949	-6.05422	1.41102e-09	4.82682e-08	668940
Klf5	Krueppel-like factor 5	526.871	-0.67643	0.179624	-3.7658	0.000166015	0.0017232	12224
Mtcl1	Microtubule cross-linking factor 1	9161.52	-0.676404	0.09706	-6.96893	3.19364e-12	1.6364e-10	68617
Hrh3	Histamine H3 receptor	2969.86	-0.676151	0.0945689	-7.14982	8.68894e-13	4.85316e-11	99296
Lin7a	Protein lin-7 homolog A	1294.14	-0.674401	0.113305	-5.9521	2.64731e-09	8.6755e-08	108030
Rimbp3	RIMS-binding protein 3	257.277	-0.674157	0.131526	-5.12565	2.96521e-07	6.37453e-06	239731
Rgs7bp	Regulator of G-protein signaling 7-binding protein	18918	-0.673389	0.0898884	-7.49138	6.81516e-14	4.31017e-12	52882
Pwwp3b	PWWP domain-containing DNA repair factor 3B	700.391	-0.67245	0.148731	-4.52124	6.14787e-06	9.5803e-05	245631
Zfp976	Zinc finger protein 976	466.856	-0.671827	0.130037	-5.16643	2.38604e-07	5.20345e-06	208111
Rpe65	Retinoid isomerohydrolase	393.878	-0.669185	0.124919	-5.35694	8.46447e-08	2.04305e-06	19892
Rps6ka4	Ribosomal protein S6 kinase alpha-4	1961.47	-0.668136	0.111562	-5.98891	2.11247e-09	7.03722e-08	56613
Zmat4	Zinc finger matrin-type protein 4	1030.86	-0.667026	0.118922	-5.60892	2.03597e-08	5.51399e-07	320158
Rxrg	Retinoic acid receptor RXR-gamma	6551.64	-0.66567	0.117118	-5.68376	1.31761e-08	3.7402e-07	20183
Chrna7	Neuronal acetylcholine receptor subunit alpha-7	999.724	-0.661658	0.141716	-4.66889	3.02838e-06	5.14209e-05	11441
Mis18a	Protein Mis18-alpha	421.137	-0.656912	0.113068	-5.80987	6.252e-09	1.90434e-07	66578
Ralgapa2	Ral GTPase-activating protein subunit alpha-2	2442.23	-0.655535	0.0967401	-6.77625	1.23337e-11	5.86735e-10	241694
Cntnap1	Contactin-associated protein 1	6035.53	-0.652654	0.0922686	-7.07341	1.51173e-12	8.12469e-11	53321
Pinx1	PIN2/TERF1-interacting telomerase inhibitor 1	616.213	-0.64843	0.118487	-5.47259	4.43511e-08	1.1279e-06	72400
Hsph1	Heat shock protein 105 kDa	9263.27	-0.648171	0.0858233	-7.5524	4.27325e-14	2.74863e-12	15505
Fcor	Foxo1-corepressor	312.76	-0.647943	0.151406	-4.2795	1.8731e-05	0.000257537	100503924
Rell1	RELT-like protein 1	373.01	-0.647935	0.17421	-3.71928	0.00019979	0.0020175	100532
Mamstr	MEF2-activating motif and SAP domain-containing transcriptional regulator	266.471	-0.647642	0.139351	-4.64755	3.35908e-06	5.626e-05	74490
Grb7	Growth factor receptor-bound protein 7	212.403	-0.647426	0.160399	-4.03634	5.4291e-05	0.000656186	14786
Hs3st4	Sulfotransferase	1763.27	-0.647118	0.114894	-5.6323	1.77823e-08	4.9263e-07	628779
Lmo7	LIM domain only 7	11866.9	-0.646616	0.0679115	-9.52146	1.70763e-21	2.37351e-19	380928
Zfp341	Zinc finger protein 341	153.288	-0.645399	0.173638	-3.71692	0.000201669	0.00203309	228807
Rassf3	Ras association domain-containing protein 3	835.112	-0.644482	0.143066	-4.50478	6.64406e-06	0.000102872	192678
Nrgn	Neurogranin	4559	-0.643627	0.127597	-5.04422	4.55382e-07	9.40514e-06	64011
Slc25a23	Calcium-binding mitochondrial carrier protein SCaMC-3	1590.41	-0.64073	0.108032	-5.93095	3.01192e-09	9.80396e-08	66972
Fam129c	Niban apoptosis regulator 3	164.773	-0.639609	0.174004	-3.67583	0.000237081	0.00233747	100037278
Zbtb18	Zinc finger and BTB domain-containing protein 18	6896.5	-0.638586	0.0876779	-7.28332	3.25715e-13	1.93074e-11	30928
Igfbp3	Insulin-like growth factor-binding protein 3	287.579	-0.638192	0.193651	-3.29557	0.000982214	0.00781152	16009
Thrb	Thyroid hormone receptor beta	2890.95	-0.637793	0.0646991	-9.85782	6.34105e-23	1.02925e-20	21834
Epb41	Protein 4.1	7150.85	-0.637532	0.0796135	-8.00783	1.16746e-15	8.96349e-14	269587
Tmprss9	Transmembrane protease serine 9	245.953	-0.637304	0.15469	-4.11988	3.79071e-05	0.00047551	432478
Ubqln4	Ubiquilin-4	4170.7	-0.636622	0.105267	-6.04768	1.46946e-09	5.01255e-08	94232
Nanos1	Nanos homolog 1	1882.36	-0.636133	0.0909953	-6.99083	2.73257e-12	1.40611e-10	332397
Ahnak	AHNAK nucleoprotein	6514.86	-0.63588	0.132341	-4.80487	1.54851e-06	2.85883e-05	66395
Ppp1r16b	Protein phosphatase 1 regulatory inhibitor subunit 16B	20840.3	-0.633299	0.0822869	-7.69623	1.4014e-14	9.49379e-13	228852
Slc7a8	Large neutral amino acids transporter small subunit 2	1039	-0.630549	0.126384	-4.98916	6.06408e-07	1.21007e-05	50934
Panx2	Pannexin-2	432.052	-0.629367	0.154496	-4.07369	4.62743e-05	0.000567229	406218
Tbc1d16	TBC1 domain family, member 16	4358.33	-0.629154	0.0956648	-6.57666	4.81144e-11	2.10045e-09	207592
Kyat3	Kynurenine--oxoglutarate transaminase 3	450.187	-0.628631	0.115308	-5.45176	4.98749e-08	1.25518e-06	229905
Tiparp	Protein mono-ADP-ribosyltransferase TIPARP	1790.33	-0.624233	0.126463	-4.93609	7.97028e-07	1.5458e-05	99929
Gm20696	Predicted gene 20696	385.692	-0.623689	0.163467	-3.81537	0.000135977	0.00146355	NA
Snx25	Sorting nexin-25	5671.78	-0.623595	0.0607157	-10.2707	9.54705e-25	1.84716e-22	102141
Apaf1	Apoptotic protease-activating factor 1	1264.88	-0.622679	0.121318	-5.13263	2.85727e-07	6.16993e-06	11783
Kdm3a	Lysine-specific demethylase 3A	6231.47	-0.622595	0.075181	-8.28128	1.21861e-16	1.04883e-14	104263
Cacnb2	Voltage-dependent L-type calcium channel subunit beta-2	4296.37	-0.622374	0.0727125	-8.55938	1.13473e-17	1.07621e-15	12296
Rasl10a	Ras-like protein family member 10A	575.159	-0.621052	0.174497	-3.55909	0.000372137	0.00343911	75668
Stk32a	Serine/threonine-protein kinase 32A	2581.77	-0.61958	0.103907	-5.96285	2.47871e-09	8.16725e-08	269019
Cd164l2	CD164 sialomucin-like 2 protein	114.811	-0.618755	0.176763	-3.50049	0.000464412	0.00415839	69655
Atf6	Cyclic AMP-dependent transcription factor ATF-6 alpha	6235.88	-0.617838	0.0953941	-6.47669	9.37555e-11	3.90271e-09	226641
Onecut2	One cut domain family member 2	2180.47	-0.616871	0.12593	-4.89854	9.65497e-07	1.84298e-05	225631
Jarid2	Protein Jumonji	2938.41	-0.615899	0.0965183	-6.38117	1.75746e-10	6.9908e-09	16468
Shank3	SH3 and multiple ankyrin repeat domains protein 3	3595.02	-0.615427	0.116574	-5.27926	1.29705e-07	3.0047e-06	58234
Phf24	PHD finger protein 24	13310.4	-0.6152	0.107193	-5.73917	9.51418e-09	2.77899e-07	230085
Tle4	Transducin-like enhancer protein 4	6657.67	-0.614693	0.082519	-7.4491	9.39762e-14	5.87291e-12	21888
Dok3	Docking protein 3	275.223	-0.612765	0.167407	-3.66033	0.000251894	0.00247142	27261
Rad9a	Cell cycle checkpoint control protein RAD9A	232.462	-0.611682	0.151739	-4.03114	5.55073e-05	0.000668548	19367
Mcf2l	Guanine nucleotide exchange factor DBS	11959.8	-0.608092	0.0628996	-9.66766	4.13747e-22	6.17683e-20	17207
Rasd2	GTP-binding protein Rhes	17927.2	-0.607819	0.105781	-5.74599	9.1382e-09	2.68213e-07	75141
Zfp3	Zinc finger protein 3	1012.42	-0.607015	0.104444	-5.81185	6.17846e-09	1.88431e-07	193043
Map2k6	Dual specificity mitogen-activated protein kinase kinase 6	512.588	-0.605148	0.105069	-5.75951	8.43588e-09	2.49721e-07	26399
Auts2	Autism susceptibility gene 2 protein homolog	278.797	-0.604524	0.166305	-3.63505	0.000277932	0.00269194	319974
Pcdhb6	Protocadherin beta-6	810.542	-0.603909	0.0985768	-6.12628	8.99558e-10	3.19469e-08	93877
Tbc1d2b	TBC1 domain family member 2B	1583.53	-0.603777	0.0947418	-6.37287	1.85528e-10	7.31973e-09	67016
Ikzf5	Zinc finger protein Pegasus	223.792	-0.603488	0.151325	-3.98801	6.66289e-05	0.000782242	67143
Prdm5	PR domain zinc finger protein 5	898.79	-0.602278	0.144043	-4.18125	2.89916e-05	0.000374752	70779
Cacng3	Voltage-dependent calcium channel gamma-3 subunit	987.707	-0.602107	0.117699	-5.11566	3.12648e-07	6.67377e-06	54376
Drd2	D(2) dopamine receptor	4154.64	-0.601868	0.0564023	-10.671	1.39142e-26	3.2049e-24	13489
Garem1	GRB2-associated and regulator of MAPK protein	1949.19	-0.598741	0.0746178	-8.0241	1.02271e-15	7.92761e-14	381126
Nipal3	NIPA-like protein 3	6805.5	-0.598355	0.0870521	-6.87353	6.26313e-12	3.11035e-10	74552
Tpd52l1	Tumor protein D53	1639.54	-0.595951	0.129617	-4.5978	4.26976e-06	6.9679e-05	21987
Peli2	E3 ubiquitin-protein ligase pellino homolog 2	1541.76	-0.592971	0.105868	-5.60106	2.13046e-08	5.75057e-07	93834
Ccm2	Cerebral cavernous malformations protein 2 homolog	4051.55	-0.592876	0.12491	-4.74643	2.07037e-06	3.67636e-05	216527
Has3	Hyaluronan synthase 3	433.008	-0.592019	0.143869	-4.11498	3.87219e-05	0.000483723	15118
Hras	GTPase HRas	6656.43	-0.591344	0.0838553	-7.05196	1.76421e-12	9.41885e-11	15461
Tnfaip3	Tumor necrosis factor alpha-induced protein 3	307.372	-0.590796	0.133578	-4.42284	9.74112e-06	0.000144533	21929
Gsdme	Gasdermin-E	2662.4	-0.590564	0.0644726	-9.15993	5.19312e-20	6.34638e-18	54722
Tgfa	Protransforming growth factor alpha	6249.97	-0.58942	0.0917188	-6.42638	1.30676e-10	5.34753e-09	21802
Bank1	B-cell scaffold protein with ankyrin repeats	198.127	-0.588942	0.154601	-3.80944	0.000139281	0.00149049	242248
Spred1	Sprouty-related, EVH1 domain-containing protein 1	16269.4	-0.588789	0.0905129	-6.50502	7.76815e-11	3.31345e-09	114715
Erc2	ERC protein 2	11210.6	-0.587916	0.0966517	-6.08283	1.18078e-09	4.10302e-08	238988
Lamp5	Lysosome-associated membrane glycoprotein 5	1046.68	-0.586517	0.141116	-4.15628	3.23477e-05	0.000413056	76161
Zfp934	Zinc finger protein 934	391.317	-0.584433	0.12721	-4.59423	4.34345e-06	7.06431e-05	77117
Lpcat4	Lysophospholipid acyltransferase LPCAT4	1837.23	-0.580458	0.0818044	-7.09568	1.28716e-12	6.97983e-11	99010
Far2	Fatty acyl-CoA reductase 2	985.343	-0.580422	0.096656	-6.00502	1.91304e-09	6.45284e-08	330450
Zfp180	Zinc finger protein 180	5575.05	-0.580347	0.0926173	-6.26607	3.70265e-10	1.3905e-08	210135
Egr1	Early growth response protein 1	2932.5	-0.580083	0.088644	-6.54397	5.99074e-11	2.58264e-09	13653
Rhobtb2	Rho-related BTB domain-containing protein 2	6563.26	-0.579886	0.0734608	-7.89382	2.93063e-15	2.1609e-13	246710
Arntl	Aryl hydrocarbon receptor nuclear translocator-like protein 1	1766.47	-0.579159	0.0955111	-6.06378	1.32955e-09	4.58705e-08	11865
Grm1	Metabotropic glutamate receptor 1	5182.85	-0.578806	0.107215	-5.39853	6.71885e-08	1.64303e-06	14816
Lrrc42	Leucine-rich repeat-containing protein 42	546.98	-0.577193	0.0928456	-6.2167	5.07729e-10	1.88046e-08	77809
Mettl23	Methyltransferase-like protein 23	1113.25	-0.576652	0.0887587	-6.49684	8.2022e-11	3.48629e-09	74319
Lrrc3b	Leucine-rich repeat-containing protein 3B	272.151	-0.576324	0.12471	-4.6213	3.81348e-06	6.2998e-05	218763
Clvs1	Clavesin-1	1408.79	-0.575793	0.0794027	-7.25155	4.12039e-13	2.41287e-11	74438
Slc1a1	Excitatory amino acid transporter 3	3697.39	-0.575158	0.0829331	-6.93521	4.05621e-12	2.05659e-10	20510
Ano6	Anoctamin-6	1308.74	-0.575012	0.0798628	-7.2	6.0214e-13	3.45089e-11	105722
Hlf	Hepatic leukemia factor	3130.18	-0.574757	0.0937343	-6.13176	8.69095e-10	3.10016e-08	217082
Parp4	Protein mono-ADP-ribosyltransferase PARP4	370.226	-0.57289	0.161891	-3.53875	0.000402033	0.00367467	328417
Grk5	G protein-coupled receptor kinase 5	1357.65	-0.571342	0.095067	-6.00988	1.85657e-09	6.27112e-08	14773
Arhgap18	Rho GTPase-activating protein 18	978.309	-0.571268	0.108955	-5.24317	1.57841e-07	3.59114e-06	73910
Abcb4	Phosphatidylcholine translocator ABCB4	611.415	-0.569049	0.109876	-5.17903	2.23047e-07	4.89953e-06	18670
Sfxn4	Sideroflexin-4	968.833	-0.568972	0.109447	-5.19861	2.00784e-07	4.44686e-06	94281
Kctd4	BTB/POZ domain-containing protein KCTD4	1192.58	-0.568917	0.128303	-4.43418	9.24251e-06	0.000138272	67516
Nyap2	Neuronal tyrosine-phosphorylated phosphoinositide-3-kinase adapter 2	2375.73	-0.5669	0.0858512	-6.60329	4.02141e-11	1.78128e-09	241134
Htr1d	5-hydroxytryptamine receptor 1D	441.102	-0.566446	0.111079	-5.09949	3.40578e-07	7.20636e-06	15552
Fam78a	Protein FAM78A	501.626	-0.566353	0.107078	-5.28914	1.2289e-07	2.86054e-06	241303
Plppr1	Phospholipid phosphatase-related protein type 1	2464.06	-0.565579	0.0836512	-6.76115	1.36898e-11	6.4792e-10	272031
Plag1	Zinc finger protein PLAG1	738.655	-0.565492	0.127922	-4.42058	9.84341e-06	0.000145783	56711
Actn2	Alpha-actinin-2	3577.55	-0.565236	0.0953377	-5.92877	3.05208e-09	9.92132e-08	11472
Lrrc8c	Volume-regulated anion channel subunit LRRC8C	767.541	-0.562727	0.0974033	-5.77729	7.59152e-09	2.2751e-07	100604
1700001K19Rik	RIKEN cDNA 1700001K19 gene	197.429	-0.562593	0.140487	-4.00459	6.21261e-05	0.000737252	66323
Arhgap33	Rho GTPase-activating protein 33	1704.45	-0.560387	0.137424	-4.07779	4.54649e-05	0.000558156	233071
Phf21b	PHD finger protein 21B	186.366	-0.559606	0.15876	-3.52485	0.000423723	0.00384964	271305
Dguok	Deoxyguanosine kinase, mitochondrial	1302.44	-0.558507	0.0919984	-6.07083	1.27252e-09	4.39656e-08	27369
Clgn	Calmegin	222.233	-0.557429	0.172386	-3.2336	0.00122239	0.00938225	12745
Vill	Villin-like protein	259.65	-0.557124	0.165078	-3.37491	0.000738389	0.00615013	22351
Fst	Follistatin	201.982	-0.554261	0.162614	-3.40844	0.000653356	0.00553658	14313
Slc7a4	Cationic amino acid transporter 4	2965.04	-0.554219	0.0807738	-6.86137	6.82026e-12	3.35943e-10	224022
Map3k13	Mitogen-activated protein kinase kinase kinase 13	1527.8	-0.551727	0.0823718	-6.698	2.11286e-11	9.73325e-10	71751
Me2	NAD-dependent malic enzyme, mitochondrial	2343.66	-0.550199	0.118321	-4.65004	3.31865e-06	5.56599e-05	107029
Bola1	BolA-like protein 1	911.947	-0.549641	0.0980666	-5.60477	2.08526e-08	5.63486e-07	69168
Dab2ip	Disabled homolog 2-interacting protein	4196.56	-0.549439	0.0846364	-6.49176	8.4837e-11	3.57453e-09	69601
Tiam1	Rho guanine nucleotide exchange factor TIAM1	5656.11	-0.54935	0.0832668	-6.59747	4.1823e-11	1.83907e-09	21844
Srpk1	SRSF protein kinase 1	4819.51	-0.549012	0.0632008	-8.68679	3.72834e-18	3.72603e-16	20815
Tlnrd1	Talin rod domain-containing protein 1	2342.74	-0.547998	0.0919577	-5.95923	2.53423e-09	8.33882e-08	80889
Zfp365	Protein ZNF365	17124.9	-0.545046	0.0829939	-6.5673	5.12369e-11	2.23273e-09	216049
Slc9b2	Sodium/hydrogen exchanger 9B2	188.469	-0.544544	0.164448	-3.31134	0.000928517	0.00744568	97086
C2cd5	C2 domain-containing protein 5	5109.61	-0.544083	0.0768028	-7.08415	1.39898e-12	7.5355e-11	74741
Foxo1	Forkhead box protein O1	1855.11	-0.543192	0.0906492	-5.99224	2.06969e-09	6.91372e-08	56458
Pdzd7	PDZ domain-containing protein 7	237.569	-0.543077	0.168179	-3.22916	0.00124152	0.00950498	100503041
Map1a	Microtubule-associated protein 1A	21689.7	-0.541478	0.124655	-4.34382	1.40027e-05	0.000198392	17754
Bcr	Breakpoint cluster region protein	14169.7	-0.541222	0.102226	-5.29435	1.19443e-07	2.78644e-06	110279
Sacs	Sacsin	13983.9	-0.540462	0.0700173	-7.71898	1.17262e-14	8.05678e-13	50720
Nrip1	Nuclear receptor-interacting protein 1	2260.7	-0.540396	0.0796539	-6.78429	1.16658e-11	5.58687e-10	268903
Lyst	Lysosomal-trafficking regulator	9366.84	-0.539445	0.0682404	-7.90507	2.67776e-15	1.98048e-13	17101
Nmnat3	Nicotinamide/nicotinic acid mononucleotide adenylyltransferase 3	434.63	-0.539408	0.12638	-4.26816	1.97095e-05	0.0002687	74080
Pik3c2b	Phosphatidylinositol-4-phosphate 3-kinase	2686.69	-0.538896	0.0770905	-6.99043	2.74048e-12	1.40719e-10	240752
Zcwpw1	Zinc finger CW-type PWWP domain protein 1	317.969	-0.53827	0.113068	-4.76058	1.93039e-06	3.46967e-05	381678
Kremen1	Kremen protein 1	1729.21	-0.537577	0.0992605	-5.41582	6.10072e-08	1.50865e-06	84035
Phlda1	Pleckstrin homology-like domain family A member 1	152.108	-0.537166	0.153204	-3.5062	0.000454553	0.00408371	21664
Dzip1l	Zinc finger protein DZIP1L	1828.22	-0.537029	0.101355	-5.29848	1.16771e-07	2.73631e-06	72507
Aoc2	Retina-specific copper amine oxidase	177.635	-0.53679	0.159176	-3.37231	0.0007454	0.00619502	237940
Ttc9	Tetratricopeptide repeat protein 9A	1585.61	-0.534712	0.0989316	-5.40487	6.48547e-08	1.59726e-06	69480
Rarb	Retinoic acid receptor beta	4384.62	-0.532241	0.0802762	-6.63012	3.3541e-11	1.49666e-09	218772
Rab40b	Ras-related protein Rab-40B	4021.83	-0.529739	0.0755025	-7.01618	2.28021e-12	1.18851e-10	217371
Jcad	Junctional protein associated with coronary artery disease	14614.6	-0.529696	0.0632191	-8.37873	5.35007e-17	4.72232e-15	240185
Cpne2	Copine-2	684.639	-0.52894	0.120611	-4.3855	1.15719e-05	0.000168088	234577
Olfml3	Olfactomedin-like protein 3	884.024	-0.528828	0.11561	-4.57425	4.77939e-06	7.6906e-05	99543
Hebp1	Heme-binding protein 1	1681.05	-0.528701	0.0800804	-6.60213	4.05303e-11	1.792e-09	15199
Srsf12	Serine/arginine-rich splicing factor 12	814.575	-0.52867	0.0979273	-5.3986	6.71644e-08	1.64303e-06	272009
Ppp4r4	Serine/threonine-protein phosphatase 4 regulatory subunit 4	5247.03	-0.527669	0.094465	-5.58586	2.32544e-08	6.20759e-07	74521
Ncoa7	Nuclear receptor coactivator 7	2727.99	-0.525816	0.106463	-4.93898	7.85318e-07	1.52676e-05	211329
Slc39a11	Zinc transporter ZIP11	958.968	-0.525372	0.1045	-5.0275	4.96925e-07	1.01676e-05	69806
Zfp882	Zinc finger protein 882	900.13	-0.52517	0.0984178	-5.33612	9.49548e-08	2.27355e-06	382019
Six3	Homeobox protein SIX3	415.528	-0.524944	0.150701	-3.48334	0.000495199	0.00438535	20473
Pmepa1	Protein TMEPAI	1400.68	-0.523767	0.0932947	-5.61411	1.97572e-08	5.37489e-07	65112
Asic4	Acid-sensing ion channel 4	5891.07	-0.521301	0.0850727	-6.12772	8.91487e-10	3.17535e-08	241118
Srm	Spermidine synthase	1279.74	-0.520926	0.0986642	-5.27979	1.29332e-07	2.99894e-06	20810
Zfp236	Zinc finger protein 236	4032.65	-0.518679	0.0693626	-7.4778	7.55795e-14	4.76013e-12	329002
Slc6a6	Sodium- and chloride-dependent taurine transporter	8474.57	-0.518672	0.093021	-5.57586	2.46306e-08	6.55326e-07	21366
Pcmtd1	Protein-L-isoaspartate O-methyltransferase domain-containing protein 1	12336.3	-0.517438	0.0665718	-7.77263	7.68727e-15	5.35783e-13	319263
Syt14	Synaptotagmin-14	3143.79	-0.517123	0.0954204	-5.41942	5.97928e-08	1.48165e-06	329324
Dock4	Dedicator of cytokinesis protein 4	9983.78	-0.51692	0.0764883	-6.75816	1.3976e-11	6.58886e-10	238130
Cyld	Ubiquitin carboxyl-terminal hydrolase CYLD	28586.7	-0.514738	0.0725136	-7.09851	1.26111e-12	6.86935e-11	74256
Dock6	Dedicator of cytokinesis protein 6	453.814	-0.514199	0.159417	-3.22549	0.00125759	0.00959761	319899
Fam171a1	Family with sequence similarity 171, member A1	3877.54	-0.513968	0.0797517	-6.44461	1.15901e-10	4.75096e-09	269233
Slc25a45	Solute carrier family 25 member 45	316.118	-0.513621	0.123106	-4.17219	3.01687e-05	0.000388307	107375
Tpst1	Protein-tyrosine sulfotransferase 1	2394.64	-0.512937	0.0656725	-7.81053	5.69493e-15	4.02725e-13	22021
Ppp1r1b	Protein phosphatase 1 regulatory subunit 1B	37176.4	-0.511721	0.0574928	-8.9006	5.55451e-19	5.91787e-17	19049
Lonrf1	LON peptidase N-terminal domain and RING finger protein 1	799.87	-0.511255	0.0891695	-5.73352	9.83703e-09	2.86292e-07	244421
Dact2	Dapper homolog 2	1892.02	-0.508591	0.155482	-3.27106	0.00107144	0.00839142	240025
Gask1b	Golgi-associated kinase 1B	512.757	-0.505829	0.141407	-3.57712	0.000347402	0.003249	68659
Dlgap2	Disks large-associated protein 2	2060.39	-0.5035	0.0995175	-5.05941	4.20556e-07	8.73809e-06	244310
Ctdspl	CTD small phosphatase-like protein	1425.01	-0.502727	0.0736514	-6.82577	8.74547e-12	4.23866e-10	69274
Mro	Protein maestro	470.053	-0.50267	0.123108	-4.08315	4.4429e-05	0.000546549	71263
AW549877	UPF0600 protein C5orf51 homolog	2772.81	-0.502216	0.0770877	-6.51487	7.27538e-11	3.11977e-09	106064
Dok4	Docking protein 4	1021.93	-0.499968	0.0885492	-5.64622	1.64012e-08	4.59633e-07	114255
Rnf44	RING finger protein 44	1606.75	-0.49988	0.096154	-5.19874	2.00648e-07	4.44686e-06	105239
Tmem86b	Lysoplasmalogenase	296.997	-0.499454	0.141795	-3.52236	0.000427723	0.00388306	68255
Wdr17	WD repeat domain 17	5098	-0.499167	0.0738531	-6.75891	1.3903e-11	6.56725e-10	244484
Erich3	Glutamate-rich 3	2555.66	-0.497045	0.0956698	-5.19543	2.0425e-07	4.51947e-06	209601
Sncaip	Synphilin-1	303.164	-0.496811	0.133511	-3.72112	0.00019834	0.00200369	67847
Bbs2	Bardet-Biedl syndrome 2 protein homolog	2485.04	-0.496296	0.0860082	-5.77033	7.91173e-09	2.35647e-07	67378
Lamb1	Laminin subunit beta-1	3112.99	-0.495783	0.0968419	-5.11951	3.06327e-07	6.5562e-06	16777
Peak1	Inactive tyrosine-protein kinase PEAK1	1642.77	-0.49549	0.106337	-4.65962	3.16794e-06	5.33172e-05	244895
Rab26	Ras-related protein Rab-26	963.215	-0.49549	0.132632	-3.73583	0.0001871	0.00190889	328778
Peli1	E3 ubiquitin-protein ligase pellino homolog 1	2976.43	-0.495482	0.100183	-4.94575	7.58499e-07	1.48057e-05	67245
Akt3	RAC-gamma serine/threonine-protein kinase	16096.2	-0.494608	0.0864575	-5.72083	1.06005e-08	3.0557e-07	23797
Il17d	Interleukin 17D	390.802	-0.494218	0.125205	-3.94727	7.90458e-05	0.000912082	239114
Ubc	Polyubiquitin-C	4697.83	-0.493827	0.136778	-3.61042	0.000305705	0.00292117	22190
Mak	Serine/threonine-protein kinase MAK	280.542	-0.493409	0.119798	-4.11867	3.81061e-05	0.000477264	17152
Jade2	E3 ubiquitin-protein ligase Jade-2	3743.42	-0.49266	0.0802588	-6.1384	8.33581e-10	2.98284e-08	76901
Plk2	Serine/threonine-protein kinase PLK2	25630.6	-0.492489	0.0546322	-9.01464	1.97514e-19	2.23219e-17	20620
Cyfip2	Cytoplasmic FMR1-interacting protein 2	15030.4	-0.492308	0.110853	-4.44107	8.95128e-06	0.000134297	76884
Plekha6	Pleckstrin homology domain-containing family A member 6	2099.72	-0.489693	0.0978251	-5.0058	5.56292e-07	1.12397e-05	240753
Wipf3	WAS/WASL-interacting protein family member 3	3496.92	-0.489398	0.112415	-4.3535	1.33978e-05	0.000190941	330319
Zmat3	Zinc finger matrin-type protein 3	2438.24	-0.488984	0.104242	-4.69084	2.7208e-06	4.68282e-05	22401
Pcdhga8	Protocadherin gamma A8	873.145	-0.488172	0.125438	-3.89175	9.95235e-05	0.00111952	93716
Rxra	Retinoic acid receptor RXR-alpha	1919.32	-0.486571	0.0994472	-4.89275	9.94343e-07	1.89654e-05	20181
Acvr1c	Activin receptor type-1C	12174	-0.486565	0.10063	-4.83518	1.33025e-06	2.47288e-05	269275
Btaf1	B-TFIID TATA-box-binding protein-associated factor 1	6462.3	-0.486255	0.0821049	-5.92236	3.17358e-09	1.02749e-07	107182
Ccdc107	Coiled-coil domain-containing protein 107	1200.48	-0.485892	0.130378	-3.72678	0.000193942	0.00196501	622404
Sbk1	Serine/threonine-protein kinase SBK1	4285.65	-0.48524	0.0785688	-6.17599	6.57518e-10	2.39129e-08	104175
Kcnn3	Small conductance calcium-activated potassium channel protein 3	2600.54	-0.484782	0.0913847	-5.30485	1.12765e-07	2.64521e-06	140493
Taf3	Transcription initiation factor TFIID subunit 3	279.992	-0.484769	0.144524	-3.35424	0.000795828	0.00653552	209361
Cradd	Death domain-containing protein CRADD	184.365	-0.484649	0.135621	-3.57357	0.000352153	0.00328581	12905
Car11	Carbonic anhydrase-related protein 11	13650	-0.482957	0.0815933	-5.91908	3.23747e-09	1.04258e-07	12348
Parp3	Protein mono-ADP-ribosyltransferase PARP3	388.672	-0.482917	0.149841	-3.22286	0.0012692	0.00967092	235587
Jph4	Junctophilin-4	6272.45	-0.482832	0.081956	-5.89135	3.83047e-09	1.20703e-07	319984
Igf1r	Insulin-like growth factor 1 receptor	3028.06	-0.482768	0.0647394	-7.45711	8.84429e-14	5.5551e-12	16001
Sfxn2	Sideroflexin-2	569.821	-0.482684	0.127203	-3.79459	0.000147888	0.00156863	94279
Slc17a8	Vesicular glutamate transporter 3	825.505	-0.48266	0.0979621	-4.927	8.35008e-07	1.61171e-05	216227
Slc25a25	Calcium-binding mitochondrial carrier protein SCaMC-2	4086.5	-0.48151	0.112799	-4.26876	1.96562e-05	0.000268124	227731
Rmnd5a	E3 ubiquitin-protein ligase RMND5A	12391.3	-0.480161	0.0656432	-7.31472	2.57921e-13	1.5402e-11	68477
Kdm7a	Lysine-specific demethylase 7A	6605.14	-0.479818	0.0556517	-8.6218	6.59078e-18	6.50604e-16	338523
Wdr54	WD repeat-containing protein 54	1136.35	-0.479607	0.10099	-4.74904	2.04389e-06	3.63199e-05	75659
Ubxn2b	UBX domain-containing protein 2B	4673.82	-0.478412	0.073006	-6.55305	5.63743e-11	2.44339e-09	68053
Flna	Filamin-A	8086.1	-0.478045	0.0848135	-5.63643	1.73613e-08	4.82624e-07	192176
Crem	cAMP-responsive element modulator	825.775	-0.475342	0.102853	-4.62158	3.80834e-06	6.2956e-05	12916
Cep57l1	Centrosomal protein CEP57L1	476.503	-0.474828	0.0998529	-4.75527	1.98182e-06	3.54514e-05	103268
Mettl8	mRNA N(3)-methylcytidine methyltransferase METTL8	540.459	-0.474381	0.127011	-3.73497	0.000187735	0.00191335	228019
Osbpl8	Oxysterol-binding protein-related protein 8	35446.2	-0.473042	0.0698066	-6.77647	1.23144e-11	5.86735e-10	237542
Slc9a1	Sodium/hydrogen exchanger 1	880.331	-0.472912	0.130164	-3.63321	0.000279915	0.00270682	20544
Tmem198b	Transmembrane protein 198b	238.433	-0.472336	0.142606	-3.31219	0.0009257	0.00743177	73827
Pcdhga6	Protocadherin gamma A6	1345.89	-0.471563	0.079936	-5.89925	3.65154e-09	1.16201e-07	93714
Kcna1	Potassium voltage-gated channel subfamily A member 1	8337.78	-0.470913	0.0745133	-6.31985	2.61817e-10	1.01313e-08	16485
Scn4b	Sodium channel subunit beta-4	79109.3	-0.470105	0.10353	-4.54076	5.60528e-06	8.82576e-05	399548
Chst15	Carbohydrate sulfotransferase 15	4752.97	-0.470059	0.0871223	-5.39539	6.83749e-08	1.67035e-06	77590
Pnma2	Paraneoplastic antigen Ma2 homolog	4214.45	-0.470005	0.0952293	-4.93551	7.99425e-07	1.54921e-05	239157
Sh3rf2	E3 ubiquitin-protein ligase SH3RF2	4380.79	-0.469539	0.106265	-4.41858	9.93508e-06	0.00014687	269016
BC024978	cDNA sequence BC024978	239.385	-0.469429	0.129328	-3.62975	0.000283692	0.0027335	414069
Pde2a	cGMP-dependent 3',5'-cyclic phosphodiesterase	2210.67	-0.469409	0.120204	-3.9051	9.41884e-05	0.00106845	207728
Ano3	Anoctamin-3	32005	-0.469391	0.0765444	-6.13228	8.66301e-10	3.09475e-08	228432
Egfem1	EGF-like and EMI domain-containing protein 1	1018.01	-0.468945	0.129929	-3.60924	0.000307092	0.00293095	75740
Proz	Vitamin K-dependent protein Z	615.579	-0.468592	0.110524	-4.23974	2.23781e-05	0.000299014	66901
Sec14l1	SEC14-like protein 1	15203.1	-0.468212	0.0551128	-8.49553	1.97039e-17	1.78639e-15	74136
Shb	SH2 domain-containing adapter protein B	1176.55	-0.467932	0.14313	-3.26929	0.00107817	0.0084387	230126
Ppp2r5d	Serine/threonine-protein phosphatase 2A 56 kDa regulatory subunit	6340.27	-0.46701	0.0665452	-7.01794	2.25166e-12	1.17616e-10	21770
Ccnk	Cyclin-K	480.086	-0.466866	0.122105	-3.82347	0.000131584	0.0014226	12454
Lipo3	Lipase	731.113	-0.466348	0.108006	-4.31778	1.57606e-05	0.000220329	381236
Sytl5	Synaptotagmin-like protein 5	805.564	-0.465955	0.114146	-4.08209	4.46329e-05	0.000548778	236643
Arl15	ADP-ribosylation factor-like protein 15	2859.09	-0.465792	0.0955358	-4.87558	1.08491e-06	2.05792e-05	218639
Pcdhb18	Protocadherin beta-18	895.326	-0.465766	0.0922749	-5.04759	4.47413e-07	9.24844e-06	93889
Rnf149	E3 ubiquitin-protein ligase RNF149	1278.33	-0.465572	0.0918698	-5.06773	4.02582e-07	8.40073e-06	67702
Grin2b	Glutamate receptor ionotropic, NMDA 2B	29125.9	-0.465092	0.10055	-4.62548	3.73738e-06	6.19524e-05	14812
Sp9	Transcription factor Sp9	571.569	-0.465079	0.096965	-4.79636	1.61575e-06	2.96037e-05	381373
Bhlhe41	Class E basic helix-loop-helix protein 41	1561.77	-0.464922	0.0809209	-5.74539	9.17089e-09	2.68846e-07	79362
Fam13a	Protein FAM13A	378.815	-0.464618	0.132408	-3.509	0.000449794	0.00404765	58909
Ankrd13a	Ankyrin repeat domain-containing protein 13A	3082.75	-0.464287	0.0905044	-5.13	2.89749e-07	6.24562e-06	68420
Skil	Ski-like protein	13269.8	-0.462604	0.076148	-6.07506	1.23943e-09	4.28836e-08	20482
Mark2	Serine/threonine-protein kinase MARK2	2635.25	-0.461349	0.0782518	-5.8957	3.73102e-09	1.18193e-07	13728
Limch1	LIM and calponin homology domains-containing protein 1	11758.7	-0.460541	0.101201	-4.55075	5.34559e-06	8.47812e-05	77569
Zfp40	Zinc finger protein 40	1168.25	-0.46047	0.0846553	-5.43936	5.34734e-08	1.33877e-06	22700
Fbxl16	F-box/LRR-repeat protein 16	18558.7	-0.460419	0.0934114	-4.92894	8.26777e-07	1.59837e-05	214931
Tcf20	Transcription factor 20	24702.5	-0.460236	0.104572	-4.40116	1.07674e-05	0.000157633	21411
Trim17	E3 ubiquitin-protein ligase TRIM17	233.329	-0.459498	0.130871	-3.51108	0.000446292	0.00402595	56631
Sntg2	Gamma-2-syntrophin	630.24	-0.459315	0.120596	-3.80872	0.000139688	0.00149352	268534
Anp32b	Acidic leucine-rich nuclear phosphoprotein 32 family member B	251.637	-0.458939	0.118401	-3.87615	0.000106124	0.00118168	67628
Akt2	RAC-beta serine/threonine-protein kinase	6671.06	-0.458872	0.0844344	-5.43466	5.4901e-08	1.37167e-06	11652
Slc41a1	Solute carrier family 41 member 1	4409.75	-0.458609	0.0822303	-5.57712	2.44527e-08	6.52026e-07	98396
Cyb561a3	Lysosomal membrane ascorbate-dependent ferrireductase CYB561A3	524.196	-0.457731	0.103304	-4.43091	9.38373e-06	0.000139831	225912
Man2a1	Alpha-mannosidase 2	3309.88	-0.457433	0.0750226	-6.09727	1.07896e-09	3.78734e-08	17158
Rbm24	RNA-binding protein 24	1646.89	-0.457372	0.0985648	-4.64032	3.47865e-06	5.81418e-05	666794
Prkci	Protein kinase C iota type	3542.57	-0.457146	0.0799785	-5.71586	1.09149e-08	3.13511e-07	18759
Kmt2d	Histone-lysine N-methyltransferase 2D	2901.16	-0.456949	0.111199	-4.1093	3.96864e-05	0.000495005	381022
Sgk3	Serine/threonine-protein kinase Sgk3	3073.44	-0.456153	0.110826	-4.11594	3.85607e-05	0.000481959	170755
Pcgf5	Polycomb group RING finger protein 5	1895.64	-0.456087	0.0716541	-6.36512	1.95136e-10	7.67375e-09	76073
Vrk3	Inactive serine/threonine-protein kinase VRK3	990.913	-0.455258	0.0684822	-6.64783	2.97445e-11	1.34462e-09	101568
Nr1d1	Nuclear receptor subfamily 1 group D member 1	995.268	-0.455089	0.117857	-3.86137	0.000112753	0.00124461	217166
Dach1	Dachshund homolog 1	4862.08	-0.455044	0.106591	-4.26906	1.96302e-05	0.000268034	13134
Ephx4	Epoxide hydrolase 4	1647.58	-0.454085	0.0583399	-7.78343	7.05822e-15	4.93362e-13	384214
Oprd1	Delta-type opioid receptor	1866.19	-0.452886	0.106225	-4.26344	2.013e-05	0.000273354	18386
Zswim4	Zinc finger SWIM domain-containing protein 4	1239.9	-0.451989	0.100646	-4.49089	7.09277e-06	0.000108983	212168
Lynx1	Ly-6/neurotoxin-like protein 1	14912.7	-0.451123	0.0804092	-5.61034	2.01929e-08	5.47494e-07	23936
Ctdnep1	CTD nuclear envelope phosphatase 1	781.803	-0.450102	0.0899195	-5.00562	5.56838e-07	1.12413e-05	67181
Doc2b	Double C2-like domain-containing protein beta	2228.84	-0.449375	0.120969	-3.71479	0.000203369	0.00204681	13447
Fam184a	Family with sequence similarity 184, member A	2825.48	-0.448922	0.08607	-5.21578	1.83046e-07	4.09525e-06	75906
Ncdn	Neurochondrin	65733.2	-0.447145	0.0966214	-4.6278	3.69573e-06	6.13881e-05	26562
Slit3	Slit homolog 3 protein	2238.27	-0.445824	0.0926231	-4.81331	1.48451e-06	2.74697e-05	20564
Sox9	Transcription factor SOX-9	608.595	-0.445149	0.128807	-3.45593	0.000548401	0.00478984	20682
Gm5141	Predicted gene 5141	491.528	-0.44415	0.124762	-3.55998	0.000370887	0.0034328	380850
Ccdc88c	Protein Daple	4756.55	-0.443575	0.0897637	-4.94159	7.74879e-07	1.50889e-05	68339
Tpm1	Tropomyosin alpha-1 chain	13980.1	-0.443049	0.081624	-5.42793	5.7012e-08	1.41856e-06	22003
Mrtfa	Myocardin-related transcription factor A	1249.94	-0.442771	0.117141	-3.7798	0.000156955	0.00165041	223701
Fam189a1	Protein FAM189A1	589.822	-0.44252	0.131579	-3.36314	0.00077062	0.00636548	70638
Fam124a	Family with sequence similarity 124, member A	369.404	-0.441604	0.135622	-3.25613	0.00112944	0.00877183	629059
Dgat2	Diacylglycerol O-acyltransferase 2	7238.1	-0.44056	0.0778334	-5.6603	1.51111e-08	4.25945e-07	67800
Svil	Supervillin	1307.02	-0.439636	0.0813654	-5.40323	6.54509e-08	1.61031e-06	225115
Ptch1	Protein patched homolog 1	2729.1	-0.438758	0.0787787	-5.5695	2.55467e-08	6.78952e-07	19206
Tlk1	Serine/threonine-protein kinase tousled-like 1	3622.03	-0.438242	0.0835983	-5.24224	1.58641e-07	3.60596e-06	228012
Akap9	A-kinase anchor protein 9	27213.7	-0.437897	0.0705229	-6.20929	5.32241e-10	1.96223e-08	100986
Sh3bgrl3	SH3 domain-binding glutamic acid-rich-like protein 3	1050.46	-0.43782	0.117092	-3.7391	0.000184678	0.00189015	73723
Samhd1	Deoxynucleoside triphosphate triphosphohydrolase SAMHD1	573.267	-0.437478	0.0985018	-4.44132	8.94089e-06	0.000134224	56045
Camkk1	Calcium/calmodulin-dependent protein kinase kinase 1	7264.75	-0.436313	0.0944576	-4.61914	3.85325e-06	6.35682e-05	55984
Rngtt	mRNA-capping enzyme	2813.31	-0.436129	0.0819149	-5.32417	1.01416e-07	2.40466e-06	24018
Nek6	Serine/threonine-protein kinase Nek6	921.631	-0.435751	0.0832348	-5.2352	1.64805e-07	3.72158e-06	59126
Kcna4	Potassium voltage-gated channel subfamily A member 4	13608.9	-0.434693	0.0907384	-4.79062	1.66265e-06	3.0417e-05	16492
Kcnq3	Potassium voltage-gated channel subfamily KQT member 3	8999.35	-0.434619	0.0916735	-4.74095	2.12722e-06	3.75983e-05	110862
Shc3	SHC-transforming protein 3	4531.6	-0.43449	0.076387	-5.68801	1.28525e-08	3.65262e-07	20418
Zfyve28	Lateral signaling target protein 2 homolog	4396.96	-0.433249	0.081603	-5.30923	1.1009e-07	2.59254e-06	231125
Arap3	Arf-GAP with Rho-GAP domain, ANK repeat and PH domain-containing protein 3	387.336	-0.432115	0.124023	-3.48416	0.000493682	0.00437351	106952
Hs6st3	Heparan-sulfate 6-O-sulfotransferase 3	1074.37	-0.431988	0.122867	-3.51591	0.000438246	0.0039652	50787
Slmap	Sarcolemmal membrane-associated protein	10494.7	-0.431794	0.0631091	-6.84202	7.80846e-12	3.80741e-10	83997
Kcnh4	potassium Voltage-gated channel, subfamily H	1023.73	-0.431765	0.129554	-3.3327	0.000860079	0.00697787	380728
Phf21a	PHD finger protein 21A	3879.49	-0.431687	0.0813384	-5.3073	1.11263e-07	2.61506e-06	192285
Ntm	Neurotrimin	6328.67	-0.43161	0.072898	-5.92073	3.20512e-09	1.03492e-07	235106
Flrt3	Leucine-rich repeat transmembrane protein FLRT3	4329.64	-0.431608	0.0987792	-4.36942	1.24576e-05	0.000178806	71436
Tmem132a	Transmembrane protein 132A	4189.67	-0.431152	0.0914625	-4.71398	2.42927e-06	4.24201e-05	98170
Fam117a	Protein FAM117A	451.21	-0.431058	0.133327	-3.23309	0.0012246	0.00939329	215512
Ciart	Circadian-associated transcriptional repressor	698.553	-0.43025	0.114759	-3.74918	0.000177416	0.00182756	229599
Ccdc112	Coiled-coil domain-containing protein 112	337.38	-0.430139	0.133578	-3.22014	0.00128127	0.00974753	240261
Atl2	Atlastin-2	5592.36	-0.429887	0.0508959	-8.4464	3.00436e-17	2.6812e-15	56298
Kctd16	BTB/POZ domain-containing protein KCTD16	2864.78	-0.429407	0.0715882	-5.99829	1.99402e-09	6.69796e-08	383348
Thsd4	Thrombospondin type-1 domain-containing protein 4	904.114	-0.42931	0.0830257	-5.17081	2.33088e-07	5.09695e-06	207596
Il34	Interleukin-34	1773.74	-0.427932	0.107959	-3.96382	7.37593e-05	0.000858042	76527
Sppl2a	Signal peptide peptidase-like 2A	4590.54	-0.42772	0.0643455	-6.64724	2.98646e-11	1.34502e-09	66552
Cd47	Leukocyte surface antigen CD47	5189.74	-0.427328	0.0849677	-5.02931	4.92258e-07	1.00978e-05	16423
Tsga10	Testis-specific gene 10 protein	1412.38	-0.426596	0.0908316	-4.69656	2.64579e-06	4.5837e-05	211484
Phf1	PHD finger protein 1	1149.65	-0.42615	0.102041	-4.17625	2.96354e-05	0.000382054	21652
S100pbp	S100P-binding protein	5422.12	-0.424968	0.0888655	-4.78215	1.73434e-06	3.16566e-05	74648
Hpca	Neuron-specific calcium-binding protein hippocalcin	61385.4	-0.424186	0.0791497	-5.35929	8.35518e-08	2.02272e-06	15444
Aim2	Interferon-inducible protein AIM2	319.58	-0.423767	0.121358	-3.49187	0.000479644	0.00426949	383619
Cdc42ep3	Cdc42 effector protein 3	1702.97	-0.423482	0.0863011	-4.90703	9.24679e-07	1.76785e-05	260409
Rab3c	Ras-related protein Rab-3C	13922.5	-0.422806	0.0970169	-4.35806	1.3122e-05	0.000187563	67295
Dcbld1	Discoidin, CUB and LCCL domain-containing protein 1	545.941	-0.422393	0.114867	-3.67724	0.000235771	0.00232644	66686
Adamts3	A disintegrin-like and metallopeptidase	2300.44	-0.421221	0.126645	-3.32599	0.000881063	0.00712659	330119
Vcan	Versican core protein	2580.97	-0.420994	0.0843974	-4.98824	6.09331e-07	1.21418e-05	13003
Osbp2	Oxysterol-binding protein 2	5260.47	-0.4209	0.0734831	-5.72785	1.01714e-08	2.94606e-07	74309
Arhgef15	Rho guanine nucleotide exchange factor 15	1342.5	-0.417868	0.0977786	-4.27362	1.92328e-05	0.000263687	442801
Carf	Calcium-responsive transcription factor	2092.72	-0.417476	0.0821249	-5.08342	3.7069e-07	7.80936e-06	241066
Gulp1	PTB domain-containing engulfment adapter protein 1	940.19	-0.416538	0.128363	-3.24499	0.00117453	0.00908411	70676
Prkar2b	cAMP-dependent protein kinase type II-beta regulatory subunit	9040.93	-0.416307	0.0713336	-5.83605	5.34519e-09	1.64053e-07	19088
Fam228b	Protein FAM228B	828.678	-0.416103	0.0845762	-4.91986	8.66066e-07	1.66899e-05	207921
Kcnip2	Kv channel-interacting protein 2	9436.3	-0.415915	0.083637	-4.97286	6.59712e-07	1.30459e-05	80906
Brdt	Bromodomain testis-specific protein	548.319	-0.415609	0.0996874	-4.16912	3.05778e-05	0.000392685	114642
Ybx3	Y-box-binding protein 3	846.997	-0.413556	0.105442	-3.9221	8.77789e-05	0.00100229	56449
Fnbp1l	Formin-binding protein 1-like	10025.7	-0.41303	0.0794159	-5.20085	1.98379e-07	4.40975e-06	214459
Bcl2	Apoptosis regulator Bcl-2	2180.84	-0.412599	0.0871041	-4.73685	2.17068e-06	3.82917e-05	12043
Mmaa	Methylmalonic aciduria type A homolog, mitochondrial	1218.45	-0.412584	0.0859892	-4.79808	1.6019e-06	2.93723e-05	109136
Baiap2	Brain-specific angiogenesis inhibitor 1-associated protein 2	20557.5	-0.412445	0.0706691	-5.83628	5.3379e-09	1.64037e-07	108100
Ptpre	Receptor-type tyrosine-protein phosphatase epsilon	1974.69	-0.411771	0.0897622	-4.58735	4.48906e-06	7.26208e-05	19267
Aff3	AF4/FMR2 family member 3	3260.84	-0.411321	0.0865359	-4.75318	2.00242e-06	3.57602e-05	16764
Scmh1	Polycomb protein SCMH1	2277.87	-0.411249	0.0854728	-4.81146	1.49834e-06	2.77044e-05	29871
Tut1	Speckle targeted PIP5K1A-regulated poly(A) polymerase	2245.41	-0.411038	0.0947328	-4.33892	1.43183e-05	0.000202745	70044
Akap1	A-kinase anchor protein 1, mitochondrial	3703.07	-0.410325	0.0970691	-4.22714	2.36676e-05	0.000314505	11640
Kcnma1	Calcium-activated potassium channel subunit alpha-1	7859.47	-0.410113	0.108833	-3.76827	0.000164381	0.00170918	16531
Ide	Insulin-degrading enzyme	1571.44	-0.410001	0.11311	-3.62481	0.000289179	0.00277863	15925
Cdk13	Cyclin-dependent kinase 13	6429.29	-0.409293	0.0709218	-5.77105	7.87811e-09	2.34935e-07	69562
R3hdm1	R3hdm1 protein	7875.3	-0.4085	0.122303	-3.34006	0.000837592	0.00682713	226412
Lrba	Lipopolysaccharide-responsive and beige-like anchor protein	10082.1	-0.407952	0.0668652	-6.10111	1.05334e-09	3.719e-08	80877
Tbc1d5	TBC1 domain family member 5	1953.45	-0.407824	0.0682627	-5.97433	2.31033e-09	7.62633e-08	72238
Dbp	D site-binding protein	3433.31	-0.407578	0.0894716	-4.55539	5.22885e-06	8.32519e-05	13170
Rgs11	Regulator of G-protein signaling 11	1538.84	-0.40747	0.0778434	-5.23448	1.65446e-07	3.73257e-06	50782
Amz1	Archaemetzincin-1	2275.28	-0.407156	0.0835772	-4.87161	1.10692e-06	2.09804e-05	231842
Icam5	Intercellular adhesion molecule 5	8297.95	-0.407117	0.0896359	-4.5419	5.57498e-06	8.79522e-05	15898
Sgip1	SH3-containing GRB2-like protein 3-interacting protein 1	4552.59	-0.405848	0.0843545	-4.81122	1.50009e-06	2.77156e-05	73094
Cap2	Adenylyl cyclase-associated protein 2	12422.6	-0.405251	0.0845431	-4.79343	1.63955e-06	3.00171e-05	67252
Acat2	Acetyl-CoA acetyltransferase, cytosolic	2374.71	-0.405181	0.119937	-3.37828	0.000729401	0.00608295	110460
Slc22a23	Solute carrier family 22 member 23	4199.6	-0.405084	0.0759159	-5.33596	9.50407e-08	2.27355e-06	73102
Wnk3	Serine/threonine-protein kinase WNK3	3791.43	-0.403659	0.0715856	-5.63883	1.71206e-08	4.76481e-07	279561
Erlin1	Erlin-1	1777.65	-0.402883	0.0846958	-4.75683	1.96658e-06	3.52309e-05	226144
Etv5	ETS translocation variant 5	3368.06	-0.402776	0.0926586	-4.34689	1.38084e-05	0.000196214	104156
Ccdc149	Coiled-coil domain-containing 149	2715.57	-0.402453	0.084125	-4.78399	1.7185e-06	3.13912e-05	100503884
Gmnn	Geminin	370.171	-0.402101	0.112575	-3.57186	0.000354456	0.00330094	57441
Scn3b	Sodium channel subunit beta-3	6571.79	-0.402086	0.0819717	-4.90518	9.33425e-07	1.78317e-05	235281
Pcdhgb6	Protocadherin gamma B6	1074.75	-0.401405	0.101208	-3.96616	7.3041e-05	0.000850577	93703
L1cam	Neural cell adhesion molecule L1	3714	-0.400546	0.123754	-3.23663	0.00120949	0.0093069	16728
Prdm10	PR domain zinc finger protein 10	1015.27	-0.399675	0.0853498	-4.68279	2.82999e-06	4.84382e-05	382066
Rell2	RELT-like protein 2	1220.48	-0.399358	0.0851149	-4.69199	2.70566e-06	4.67068e-05	225392
Csdc2	Cold shock domain-containing protein C2	974.701	-0.399259	0.117823	-3.38865	0.000702382	0.005884	105859
Klhl15	Kelch-like protein 15	2914.99	-0.398889	0.0614719	-6.48897	8.64246e-11	3.61623e-09	236904
Lrrc8b	Volume-regulated anion channel subunit LRRC8B	4712.28	-0.398616	0.0690213	-5.77525	7.68378e-09	2.2999e-07	433926
Spata13	Spermatogenesis-associated protein 13	4085.57	-0.398599	0.108743	-3.66553	0.000246825	0.00242662	219140
Zfp319	Zinc finger protein 319	829.899	-0.398507	0.0946511	-4.21028	2.55057e-05	0.000335978	79233
Foxn2	Forkhead box N2	2910.96	-0.397458	0.0914071	-4.34821	1.37251e-05	0.000195145	14236
Plpp6	Phospholipid phosphatase 6	1372.86	-0.396085	0.0792406	-4.99851	5.77758e-07	1.15863e-05	74411
Chd3	DNA helicase	18788.5	-0.3957	0.0886603	-4.4631	8.07836e-06	0.000122646	216848
Lmtk3	Serine/threonine-protein kinase LMTK3	1929.07	-0.394815	0.104172	-3.79003	0.000150626	0.00159287	381983
St3gal2	CMP-N-acetylneuraminate-beta-galactosamide-alpha-2,3-sialyltransferase 2	2822.07	-0.394755	0.0750227	-5.2618	1.42652e-07	3.27017e-06	20444
Golga4	Golgin subfamily A member 4	10369.3	-0.394672	0.0633534	-6.22969	4.6736e-10	1.73894e-08	54214
Inpp5j	Phosphatidylinositol 4,5-bisphosphate 5-phosphatase A	1160.01	-0.394365	0.0876545	-4.49909	6.82461e-06	0.000105533	170835
Lmtk2	Serine/threonine-protein kinase LMTK2	12310	-0.394002	0.0699741	-5.63069	1.79487e-08	4.9667e-07	231876
Zbtb34	Zinc finger and BTB domain-containing 34	475.321	-0.393524	0.106051	-3.71071	0.000206676	0.00207696	241311
Taf4	TATA-box-binding protein-associated factor 4	786.727	-0.393054	0.0874434	-4.49495	6.95872e-06	0.00010729	228980
Actn1	Alpha-actinin-1	3685.17	-0.392613	0.0835777	-4.69758	2.63259e-06	4.5641e-05	109711
Gpcpd1	Glycerophosphocholine phosphodiesterase GPCPD1	7188.37	-0.392076	0.0788737	-4.97094	6.66286e-07	1.31437e-05	74182
Letm2	LETM1 domain-containing protein LETM2, mitochondrial	709.35	-0.391895	0.114005	-3.43752	0.00058707	0.00507082	270035
Kcna5	Potassium voltage-gated channel subfamily A member 5	2319.64	-0.391757	0.117297	-3.33988	0.000838145	0.00682713	16493
Gng7	Guanine nucleotide-binding protein G(I)/G(S)/G(O) subunit gamma-7	19668.4	-0.3917	0.0838621	-4.67076	3.00087e-06	5.10021e-05	14708
Mal2	Protein MAL2	6426.94	-0.391339	0.0890479	-4.39471	1.10923e-05	0.000161802	105853
Wasf2	Wiskott-Aldrich syndrome protein family member 2	656.261	-0.390384	0.0975915	-4.00018	6.32933e-05	0.000748167	242687
Pde10a	cAMP and cAMP-inhibited cGMP 3',5'-cyclic phosphodiesterase 10A	92286.2	-0.389311	0.0790934	-4.92217	8.55918e-07	1.65075e-05	23984
Sike1	Suppressor of IKBKE 1	1910.02	-0.388534	0.0672138	-5.78057	7.44495e-09	2.23395e-07	66641
9930021J03Rik	RIKEN cDNA 9930021J03 gene	4493.69	-0.387422	0.07073	-5.47749	4.3141e-08	1.10292e-06	240613
Dgkb	Diacylglycerol kinase beta	43377.9	-0.387231	0.053778	-7.20054	5.99728e-13	3.44523e-11	217480
Gtf2h2	General transcription factor IIH subunit 2	1326.69	-0.387162	0.0911954	-4.24541	2.18198e-05	0.000293615	23894
Upf1	Regulator of nonsense transcripts 1	3445.44	-0.387125	0.116104	-3.33429	0.000855162	0.00694496	19704
Ryr3	Ryanodine receptor 3	16460.7	-0.385673	0.0795826	-4.84621	1.25844e-06	2.35757e-05	20192
Eml5	Echinoderm microtubule-associated protein-like 5	8527.62	-0.383142	0.0620191	-6.17781	6.49982e-10	2.37101e-08	319670
Rin1	Ras and Rab interactor 1	3973.09	-0.382533	0.100434	-3.80879	0.000139646	0.00149352	225870
Cry1	Cryptochrome-1	1724.59	-0.382148	0.118435	-3.22665	0.00125247	0.0095676	12952
Foxp1	Forkhead box protein P1	16898.6	-0.381882	0.0769315	-4.96392	6.90833e-07	1.35946e-05	108655
Cpeb2	Cytoplasmic polyadenylation element-binding protein 2	2394.74	-0.381596	0.090445	-4.21909	2.45287e-05	0.000325234	231207
Slc25a33	Solute carrier family 25 member 33	1394.28	-0.381467	0.115953	-3.28984	0.00100245	0.00794363	70556
Brd4	Bromodomain-containing protein 4	873.132	-0.381457	0.103335	-3.69147	0.000222964	0.00221818	57261
Zfp710	Zinc finger protein 710	1253.14	-0.380254	0.108818	-3.4944	0.000475128	0.00423552	209225
Cyp7b1	Cytochrome P450 7B1	746.379	-0.379843	0.092521	-4.10547	4.03491e-05	0.000501719	13123
Ppp1r9a	Protein phosphatase 1, regulatory subunit 9A	54080.9	-0.379338	0.0637745	-5.94812	2.71234e-09	8.85262e-08	243725
Smarcd1	SWI/SNF-related matrix-associated actin-dependent regulator of chromatin subfamily D member 1	2636.7	-0.379309	0.0712275	-5.32531	1.00779e-07	2.39424e-06	83797
Elk1	ETS domain-containing protein Elk-1	2091.56	-0.37809	0.0726869	-5.20163	1.97549e-07	4.39937e-06	13712
Diaph2	Protein diaphanous homolog 2	2674.54	-0.377566	0.0767601	-4.91879	8.70824e-07	1.67565e-05	54004
Ppig	Peptidyl-prolyl cis-trans isomerase G	3194.4	-0.376958	0.0600347	-6.27901	3.40746e-10	1.28765e-08	228005
Pak3	Serine/threonine-protein kinase PAK 3	8655.36	-0.376439	0.112374	-3.34989	0.000808447	0.00661668	18481
Slc22a15	Solute carrier family 22 member 15	447.402	-0.376413	0.115007	-3.27297	0.00106424	0.00834317	242126
Wipf2	WAS/WASL-interacting protein family member 2	1015.67	-0.376168	0.113443	-3.31593	0.000913388	0.00734874	68524
Itgbl1	Integrin beta-like protein 1	819.601	-0.375416	0.107259	-3.50009	0.000465096	0.00416297	223272
Ccdc85c	Coiled-coil domain-containing protein 85C	5624.09	-0.374972	0.0914672	-4.09953	4.13997e-05	0.00051399	668158
St6galnac3	Alpha-N-acetylgalactosaminide alpha-2,6-sialyltransferase 3	827.674	-0.3749	0.100617	-3.72603	0.000194522	0.00197006	20447
Rnf103	E3 ubiquitin-protein ligase RNF103	4843.81	-0.374658	0.0592507	-6.32327	2.56088e-10	9.94137e-09	22644
Unc79	Protein unc-79 homolog	8211.91	-0.374576	0.0572267	-6.54547	5.93077e-11	2.56135e-09	217843
Nedd4l	E3 ubiquitin-protein ligase NEDD4-like	11676.1	-0.374317	0.0879959	-4.2538	2.1017e-05	0.000284281	83814
Xrcc4	DNA repair protein XRCC4	1109.66	-0.373265	0.104378	-3.57609	0.000348774	0.00326057	108138
Rbms1	RNA-binding motif, single-stranded-interacting protein 1	1786.79	-0.373204	0.0815622	-4.5757	4.74635e-06	7.64251e-05	56878
Dnajc28	DnaJ homolog subfamily C member 28	841.36	-0.373144	0.0834246	-4.47283	7.71916e-06	0.000117562	246738
Tef	Thyrotroph embryonic factor	29035.6	-0.37301	0.0608754	-6.12743	8.93087e-10	3.17637e-08	21685
Fyco1	FYVE and coiled-coil domain-containing protein 1	2089.07	-0.372992	0.110111	-3.38741	0.000705571	0.00590663	17281
Srbd1	S1 RNA-binding domain-containing protein 1	1223.48	-0.372117	0.0810174	-4.59305	4.36807e-06	7.09959e-05	78586
Pip5k1a	Phosphatidylinositol 4-phosphate 5-kinase type-1 alpha	4224.12	-0.371205	0.0841617	-4.41061	1.03079e-05	0.000151549	18720
Gm1043	Predicted gene 1043	2389.86	-0.371086	0.0974111	-3.80949	0.000139254	0.00149049	381634
Rundc1	RUN domain-containing protein 1	2148.25	-0.371038	0.0882179	-4.20593	2.60012e-05	0.000342318	217201
Pcdhb14	Protocadherin beta-14	1983.47	-0.370939	0.102077	-3.6339	0.000279164	0.00270172	93885
Ctnna3	Catenin alpha-3	517.321	-0.370708	0.104885	-3.53444	0.000408641	0.00372943	216033
Slc8a2	Sodium/calcium exchanger 2	12622.2	-0.369841	0.0917723	-4.02999	5.57796e-05	0.000671307	110891
Kmt2a	Histone-lysine N-methyltransferase 2A	4781.06	-0.369646	0.0822035	-4.49672	6.90082e-06	0.000106507	214162
Psmg4	Proteasome assembly chaperone 4	638.816	-0.369446	0.100143	-3.68917	0.000224983	0.00223642	69666
Lmf1	Lipase maturation factor 1	857.333	-0.369284	0.103024	-3.58446	0.000337772	0.00317614	76483
mt-Nd3	NADH-ubiquinone oxidoreductase chain 3	602.756	-0.36904	0.104504	-3.53134	0.000413467	0.0037692	NA
Zfat	Zinc finger protein ZFAT	990.744	-0.3683	0.083368	-4.41776	9.97274e-06	0.000147247	380993
Gsk3b	Glycogen synthase kinase-3 beta	11758.9	-0.368165	0.0690135	-5.33467	9.57161e-08	2.28744e-06	56637
Cdyl	Chromodomain Y-like protein	2558.41	-0.368157	0.114598	-3.21259	0.00131545	0.00995128	12593
Kcns1	Potassium voltage-gated channel subfamily S member 1	615.468	-0.366815	0.106821	-3.43393	0.000594889	0.00512128	16538
Samd1	Atherin	1106.75	-0.36635	0.0906633	-4.04077	5.32751e-05	0.000646364	666704
Kcnj11	ATP-sensitive inward rectifier potassium channel 11	1800.36	-0.366302	0.103566	-3.5369	0.000404852	0.00369903	16514
Pou3f4	POU domain, class 3, transcription factor 4	2636.05	-0.365618	0.0941187	-3.88465	0.000102478	0.00114742	18994
Sipa1l3	Signal-induced proliferation-associated 1-like protein 3	1050.77	-0.365563	0.111391	-3.2818	0.00103148	0.00812846	74206
P4ha1	Prolyl 4-hydroxylase subunit alpha-1	6176.07	-0.365175	0.0727733	-5.01797	5.22197e-07	1.06307e-05	18451
Dock10	Dedicator of cytokinesis protein 10	7450.99	-0.365063	0.0705993	-5.17092	2.32944e-07	5.09695e-06	210293
Osbp	Oxysterol-binding protein 1	4330.81	-0.365037	0.068662	-5.31644	1.0582e-07	2.50171e-06	76303
Pptc7	Protein phosphatase PTC7 homolog	6970.48	-0.363415	0.0646807	-5.61861	1.92504e-08	5.2607e-07	320717
Clec2l	C-type lectin domain family 2 member L	800.461	-0.363053	0.101632	-3.57225	0.000353927	0.00329966	665180
Eepd1	Endonuclease/exonuclease/phosphatase family domain-containing protein 1	1795.55	-0.362327	0.062742	-5.77487	7.70134e-09	2.30231e-07	67484
Mapk3	Mitogen-activated protein kinase 3	2421.78	-0.362023	0.0859049	-4.21422	2.50639e-05	0.000331241	26417
Kcnip3	Calsenilin	3338.4	-0.360928	0.0864807	-4.17351	2.99939e-05	0.000386264	56461
Zfp574	Zinc finger protein 574	1069.67	-0.360887	0.0930382	-3.87892	0.000104923	0.00117208	232976
Tmtc1	Protein O-mannosyl-transferase TMTC1	7565.72	-0.360538	0.0678993	-5.30989	1.09691e-07	2.58565e-06	387314
Nhsl2	NHS-like protein 2	4501.38	-0.359534	0.0815763	-4.40733	1.04653e-05	0.000153488	100042480
Thap1	THAP domain-containing protein 1	682.378	-0.359197	0.092096	-3.90025	9.60923e-05	0.00108649	73754
Uxs1	UDP-glucuronic acid decarboxylase 1	2089.58	-0.35842	0.068482	-5.23378	1.66077e-07	3.7433e-06	67883
Cntn4	Contactin-4	2861.42	-0.357505	0.0784588	-4.55659	5.19912e-06	8.28332e-05	269784
Drosha	Ribonuclease 3	2841.6	-0.357352	0.0713138	-5.01098	5.41546e-07	1.09969e-05	14000
Arhgap32	Rho GTPase-activating protein 32	21077.6	-0.357224	0.0674276	-5.2979	1.17142e-07	2.73992e-06	330914
Zdbf2	DBF4-type zinc finger-containing protein 2 homolog	2655.47	-0.356849	0.0941948	-3.78841	0.000151612	0.00160189	73884
Tmem47	Transmembrane protein 47	8580.37	-0.356344	0.0936232	-3.80615	0.000141144	0.00150709	192216
Slc7a14	Probable cationic amino acid transporter	7847.57	-0.35599	0.0945299	-3.7659	0.00016595	0.0017232	241919
Shisa9	Protein shisa-9	2654.78	-0.35589	0.0754771	-4.71521	2.41462e-06	4.21948e-05	72555
Naa16	N-alpha-acetyltransferase 16, NatA auxiliary subunit	658.823	-0.355767	0.0900181	-3.95217	7.74454e-05	0.00089618	66897
Gria3	Glutamate receptor 3	8576.35	-0.354643	0.0963568	-3.68052	0.000232756	0.00230213	53623
Zbtb4	Zinc finger and BTB domain-containing protein 4	5999.27	-0.352821	0.0597611	-5.90386	3.55098e-09	1.13149e-07	75580
Spen	Msx2-interacting protein	1900.82	-0.352816	0.0749915	-4.70475	2.54181e-06	4.41621e-05	56381
Mmd	Monocyte to macrophage differentiation factor	6413.06	-0.352696	0.0652167	-5.40807	6.37084e-08	1.57384e-06	67468
Cep126	Centrosomal protein of 126 kDa	1921.84	-0.352673	0.0585806	-6.02031	1.74084e-09	5.89666e-08	234915
Kcnd2	Potassium voltage-gated channel subfamily D member 2	11307.7	-0.352055	0.0710241	-4.95685	7.16462e-07	1.40305e-05	16508
Cd68	Macrosialin	528.541	-0.351957	0.0987512	-3.56408	0.000365131	0.0033886	12514
Sik3	Serine/threonine-protein kinase SIK3	5110.67	-0.35172	0.0736133	-4.77794	1.77096e-06	3.22278e-05	70661
Hlcs	Biotin--protein ligase	864.494	-0.351621	0.0909995	-3.86398	0.000111552	0.00123304	110948
Cystm1	Cysteine-rich and transmembrane domain-containing protein 1	2595.95	-0.351569	0.0809302	-4.34411	1.39843e-05	0.000198364	66060
Usp28	Ubiquitin carboxyl-terminal hydrolase 28	2664.91	-0.3503	0.0962183	-3.64068	0.000271922	0.0026422	235323
Spr	Sepiapterin reductase	2004.7	-0.350075	0.0938524	-3.73006	0.000191432	0.00194366	20751
Gm38393	Predicted gene, 38393	3230	-0.349764	0.082985	-4.21478	2.50018e-05	0.0003306	NA
Mbd2	Methyl-CpG-binding domain protein 2	2451.38	-0.349554	0.0826769	-4.22795	2.35828e-05	0.000313897	17191
Map7	Ensconsin	4898.31	-0.349277	0.0748706	-4.66508	3.08504e-06	5.21395e-05	17761
Sorbs1	Sorbin and SH3 domain-containing protein 1	3445.68	-0.349234	0.0735858	-4.74594	2.07537e-06	3.68252e-05	20411
Unc13a	Protein unc-13 homolog A	12584.3	-0.348715	0.0813466	-4.28678	1.8128e-05	0.000250243	382018
Dcaf17	DDB1- and CUL4-associated factor 17	1388.46	-0.34844	0.0747577	-4.66092	3.14799e-06	5.30921e-05	75763
Bend4	BEN domain-containing protein 4	912.52	-0.347271	0.0749457	-4.63363	3.593e-06	5.98875e-05	666938
Hnrnpll	Heterogeneous nuclear ribonucleoprotein L-like	4473.44	-0.347252	0.0630815	-5.50481	3.69573e-08	9.54928e-07	72692
Per1	Period circadian protein homolog 1	2562.95	-0.346383	0.0784484	-4.41543	1.0081e-05	0.000148483	18626
Gucy1a2	Guanylate cyclase	2138.3	-0.346129	0.0800022	-4.3265	1.51498e-05	0.000213146	234889
Rhot2	Mitochondrial Rho GTPase 2	1798.59	-0.346126	0.102598	-3.3736	0.000741922	0.0061746	214952
Tmem164	Transmembrane protein 164	3123.23	-0.346074	0.100332	-3.44929	0.000562053	0.00489494	209497
Ccl27a	C-C motif chemokine 27	1863.02	-0.345976	0.097289	-3.55617	0.000376299	0.00346697	20301
Pcsk9	Proprotein convertase subtilisin/kexin type 9	693.18	-0.345838	0.0915915	-3.77587	0.00015945	0.00166867	100102
Fbf1	Fas-binding factor 1	4410.28	-0.345437	0.0946603	-3.64923	0.000263028	0.00256816	217335
Selenoi	Ethanolaminephosphotransferase 1	7493.61	-0.344562	0.0575587	-5.98628	2.14701e-09	7.12283e-08	28042
Hey1	Hairy/enhancer-of-split related with YRPW motif protein 1	3595.87	-0.34436	0.0668038	-5.1548	2.53902e-07	5.52214e-06	15213
AW146154	Expressed sequence AW146154	456.981	-0.344336	0.102689	-3.35319	0.000798851	0.00655367	101835
Acap2	Arf-GAP with coiled-coil, ANK repeat and PH domain-containing protein 2	10177.5	-0.344333	0.0530441	-6.49145	8.50132e-11	3.57573e-09	78618
Atp8a1	Phospholipid-transporting ATPase IA	20710.8	-0.343766	0.056509	-6.08338	1.17675e-09	4.10066e-08	11980
Numb	Protein numb homolog	1674.91	-0.34373	0.0743348	-4.62407	3.76277e-06	6.23305e-05	18222
Xxylt1	Xyloside xylosyltransferase 1	1398.68	-0.343411	0.0752426	-4.56405	5.01753e-06	8.02572e-05	268880
Trim9	E3 ubiquitin-protein ligase TRIM9	5282.87	-0.343168	0.0780947	-4.39426	1.11151e-05	0.000162036	94090
Dchs1	Protocadherin-16	945.1	-0.342666	0.0985936	-3.47554	0.000509832	0.00449683	233651
Ampd3	AMP deaminase 3	746.555	-0.342107	0.097596	-3.50533	0.000456036	0.00409399	11717
Ppm1d	Protein phosphatase 1D	1250.72	-0.341951	0.0872441	-3.91947	8.87452e-05	0.00101193	53892
Pwwp2a	PWWP domain-containing protein 2A	1371.62	-0.341771	0.105172	-3.24964	0.00115551	0.00894846	70802
Fam131b	Protein FAM131B	7309.01	-0.341721	0.0805475	-4.24247	2.21071e-05	0.000296211	76156
Slitrk2	SLIT and NTRK-like protein 2	2549.48	-0.341319	0.060055	-5.68344	1.32015e-08	3.743e-07	245450
Prdm15	PR domain zinc finger protein 15	1315.16	-0.340744	0.0814243	-4.1848	2.85421e-05	0.000369733	114604
Zbtb49	Zinc finger and BTB domain-containing protein 49	1048.94	-0.339877	0.088995	-3.81905	0.000133965	0.00144511	75079
Phactr3	Phosphatase and actin regulator 3	7510.15	-0.339603	0.0618031	-5.49492	3.90886e-08	1.0057e-06	74189
Adgrl1	Adhesion G protein-coupled receptor L1	14223.9	-0.339205	0.0996602	-3.40361	0.000665006	0.00561759	330814
Msmo1	Methylsterol monooxygenase 1	4862.27	-0.339141	0.103424	-3.27912	0.00104131	0.00819528	66234
Kdm3b	Lysine-specific demethylase 3B	2838.75	-0.339119	0.0660827	-5.13174	2.87078e-07	6.19356e-06	277250
Noct	Nocturnin	1415.01	-0.339081	0.0965668	-3.51137	0.000445809	0.0040231	12457
Riox2	Ribosomal oxygenase 2	587.146	-0.339037	0.0978922	-3.46338	0.000533444	0.0046744	67014
Neurl1a	E3 ubiquitin-protein ligase NEURL1	5503.94	-0.338174	0.105067	-3.21867	0.00128788	0.00978247	18011
Rab30	Ras-related protein Rab-30	5576.99	-0.338118	0.0782944	-4.31855	1.57058e-05	0.000219691	75985
Rab11fip3	Rab11 family-interacting protein 3	2965.53	-0.337856	0.0918913	-3.67669	0.000236281	0.00233052	215445
Ubald1	UBA-like domain-containing protein 1	1243.68	-0.337448	0.0925185	-3.64736	0.000264951	0.0025838	207740
Mterf2	Transcription termination factor 2, mitochondrial	932.567	-0.337278	0.0853461	-3.95188	7.75403e-05	0.000896849	74238
Tnrc18	Trinucleotide repeat-containing gene 18 protein	1306.16	-0.337036	0.0960902	-3.50749	0.000452351	0.00406794	231861
Ylpm1	YLP motif-containing protein 1	4655.47	-0.336975	0.0835891	-4.03133	5.54628e-05	0.000668344	56531
Ddn	Dendrin	51320.3	-0.335951	0.088633	-3.79037	0.000150425	0.00159144	13199
Ccdc134	Coiled-coil domain-containing protein 134	825.874	-0.335339	0.0889453	-3.77018	0.000163133	0.00169986	76457
Zc3h6	Zinc finger CCCH domain-containing protein 6	1218.12	-0.335186	0.0764554	-4.38407	1.16481e-05	0.000168789	78751
9330159F19Rik	RIKEN cDNA 9330159F19 gene	3085.59	-0.334804	0.0639409	-5.23615	1.63963e-07	3.70601e-06	212448
Zbtb20	Zinc finger and BTB domain-containing protein 20	10912	-0.334489	0.0828166	-4.03891	5.36997e-05	0.000650279	56490
Sf1	Splicing factor 1	866.209	-0.334206	0.0763922	-4.37487	1.21505e-05	0.000174917	22668
Smyd5	SET and MYND domain-containing protein 5	2366.82	-0.334201	0.0975156	-3.42716	0.000609935	0.00522539	232187
Slc24a2	Slc24a2 protein	32546.7	-0.334031	0.0848349	-3.93742	8.23635e-05	0.000944953	76376
Mef2a	Myocyte-specific enhancer factor 2A	10534.5	-0.333954	0.0720857	-4.63274	3.6086e-06	6.00647e-05	17258
Diaph1	Protein diaphanous homolog 1	1841.58	-0.333867	0.0872698	-3.82568	0.000130411	0.00141055	13367
Fem1c	Protein fem-1 homolog C	2243.99	-0.333651	0.0666502	-5.006	5.55727e-07	1.12377e-05	240263
Dnajb1	DnaJ homolog subfamily B member 1	2718.77	-0.333643	0.0810966	-4.11414	3.88622e-05	0.000485225	81489
Usp3	Ubiquitin carboxyl-terminal hydrolase 3	3271.61	-0.333503	0.0666014	-5.00744	5.51575e-07	1.11724e-05	235441
Vcl	Vinculin	1912.2	-0.333464	0.0991302	-3.3639	0.000768498	0.00635206	22330
Sorl1	Sortilin-related receptor	15279.3	-0.332887	0.0891298	-3.73486	0.00018782	0.0019134	20660
Ell2	RNA polymerase II elongation factor ELL2	1347.09	-0.33281	0.0789786	-4.21393	2.50969e-05	0.000331379	192657
Zfp932	Zinc finger protein 431	1722.72	-0.332235	0.0816586	-4.06858	4.72996e-05	0.000578917	69504
Dym	Dymeclin	2319.49	-0.331915	0.0809971	-4.09787	4.16973e-05	0.000516359	69190
Stag1	Cohesin subunit SA-1	6321.84	-0.331764	0.0926476	-3.58093	0.000342375	0.00321068	20842
Lamc1	Laminin subunit gamma-1	2178.51	-0.331298	0.0853532	-3.88149	0.000103819	0.00116082	226519
Atf6b	Cyclic AMP-dependent transcription factor ATF-6 beta	1665.69	-0.331182	0.0765636	-4.32558	1.52131e-05	0.000213788	12915
Pcp4	Calmodulin regulator protein PCP4	8943.66	-0.33096	0.0834465	-3.96614	7.30473e-05	0.000850577	18546
Arnt	Aryl hydrocarbon receptor nuclear translocator	1441.48	-0.330765	0.0788035	-4.19734	2.70064e-05	0.000352864	11863
Ngef	Ephexin-1	22898.6	-0.330053	0.0747367	-4.41622	1.00442e-05	0.000148212	53972
Sfxn3	Sideroflexin-3	2375.06	-0.329681	0.082766	-3.98329	6.79668e-05	0.000796404	94280
Foxj2	Forkhead box protein J2	1037.19	-0.329656	0.0936105	-3.52157	0.000428993	0.00389314	60611
Penk	Proenkephalin-A	29059.2	-0.329017	0.0634261	-5.1874	2.13251e-07	4.69714e-06	18619
Frs3	Fibroblast growth factor receptor substrate 3	581.767	-0.328816	0.102058	-3.22185	0.00127367	0.00970194	107971
Wasf1	Wiskott-Aldrich syndrome protein family member 1	2603.94	-0.328245	0.10157	-3.23169	0.00123059	0.00942722	83767
C9orf72	Guanine nucleotide exchange C9orf72 homolog	1855.86	-0.327664	0.0714873	-4.58353	4.57195e-06	7.38134e-05	73205
Hirip3	HIRA-interacting protein 3	952.16	-0.327664	0.10006	-3.27467	0.00105787	0.00829858	233876
Dmtf1	Cyclin-D-binding Myb-like transcription factor 1	4055.57	-0.327003	0.0720603	-4.53791	5.68145e-06	8.92825e-05	23857
Celf3	CUGBP Elav-like family member 3	3754.74	-0.326758	0.0979813	-3.3349	0.000853308	0.00693223	78784
Prkcb	Protein kinase C beta type	40007.4	-0.32624	0.0612571	-5.32575	1.00535e-07	2.3908e-06	18751
Zfp950	Zinc finger protein 950	4802	-0.32577	0.0912036	-3.5719	0.000354405	0.00330094	414758
Shisa7	Protein shisa-7	2031.39	-0.324975	0.0847678	-3.8337	0.000126228	0.00137452	232813
Chmp2b	Charged multivesicular body protein 2b	2175.69	-0.324859	0.0693767	-4.68253	2.8335e-06	4.84641e-05	68942
Plcl2	Inactive phospholipase C-like protein 2	12525.9	-0.324157	0.0823083	-3.93833	8.2051e-05	0.000941815	224860
Hcn2	Potassium/sodium hyperpolarization-activated cyclic nucleotide-gated channel 2	2539.2	-0.323976	0.0908846	-3.56469	0.00036428	0.003382	15166
Arhgap20	Rho GTPase-activating protein 20	7577.02	-0.323857	0.0773199	-4.18853	2.80761e-05	0.000364673	244867
Aamdc	Mth938 domain-containing protein	1164.61	-0.323251	0.0856139	-3.77569	0.000159567	0.00166917	66273
Ndst1	Bifunctional heparan sulfate N-deacetylase/N-sulfotransferase 1	6749.96	-0.322474	0.0822219	-3.922	8.78167e-05	0.00100229	15531
Tbc1d20	TBC1 domain family member 20	3487.88	-0.322448	0.0835398	-3.85981	0.000113474	0.00125085	67231
Arid1a	AT-rich interactive domain-containing protein 1A	2323.1	-0.322407	0.0988663	-3.26104	0.00111003	0.00865169	93760
Pbx2	Pre-B-cell leukemia transcription factor 2	2947.29	-0.322027	0.0742604	-4.33646	1.44795e-05	0.000204788	18515
Pou3f3	POU domain, class 3, transcription factor 3	6274.03	-0.321499	0.0785081	-4.09511	4.21966e-05	0.000521796	18993
Myo1d	Unconventional myosin-Id	897.511	-0.321168	0.0840645	-3.82049	0.000133187	0.00143856	338367
Zbtb7a	Zinc finger and BTB domain-containing protein 7A	1725.79	-0.320516	0.0866262	-3.69999	0.000215606	0.00215562	16969
Ksr2	Kinase suppressor of Ras 2	2585.97	-0.320453	0.0821152	-3.90248	9.52122e-05	0.00107906	333050
Ncoa6	Nuclear receptor coactivator 6	1030.09	-0.320129	0.0956506	-3.34686	0.000817329	0.00668326	56406
Fbxl17	F-box/LRR-repeat protein 17	2805.89	-0.31998	0.0758938	-4.21616	2.48501e-05	0.000328775	50758
Mbnl2	Muscleblind-like protein 2	16740.9	-0.319448	0.0661656	-4.82801	1.37903e-06	2.56158e-05	105559
mt-Nd2	NADH-ubiquinone oxidoreductase chain 2	5978.83	-0.319136	0.0893638	-3.5712	0.000355346	0.00330794	NA
Sema6a	Semaphorin-6A	632.894	-0.319049	0.0991109	-3.21911	0.00128587	0.00977029	20358
Mllt6	Myeloid/lymphoid or mixed-lineage leukemia; translocated to, 6	12154.7	-0.318734	0.0881511	-3.61577	0.000299459	0.00286594	246198
Zfp959	Zinc finger protein 959	591.234	-0.318692	0.0926953	-3.43805	0.00058591	0.00506261	224893
Aff4	AF4/FMR2 family member 4	20463.3	-0.318675	0.0532313	-5.98661	2.14266e-09	7.11997e-08	93736
Crebrf	CREB3 regulatory factor	15534.7	-0.31843	0.0938794	-3.3919	0.000694091	0.00582059	77128
Sgtb	Small glutamine-rich tetratricopeptide repeat-containing protein beta	6556.43	-0.31821	0.0883752	-3.60067	0.000317399	0.00301267	218544
Anapc16	Anaphase-promoting complex subunit 16	3203.37	-0.317861	0.0859202	-3.69949	0.000216031	0.00215897	52717
Prkx	cAMP-dependent protein kinase catalytic subunit PRKX	659.614	-0.317771	0.0827895	-3.8383	0.00012389	0.00135456	19108
Ndfip2	NEDD4 family-interacting protein 2	8711.96	-0.317529	0.0858659	-3.69796	0.000217336	0.00217022	76273
Kctd1	BTB/POZ domain-containing protein KCTD1	3477.32	-0.317437	0.0890811	-3.56345	0.000366006	0.00339542	106931
Syne1	Nesprin-1	66358.7	-0.317327	0.0670438	-4.73313	2.21083e-06	3.89431e-05	64009
Far1	Fatty acyl-CoA reductase 1	8515.16	-0.316357	0.0655841	-4.82368	1.40932e-06	2.61583e-05	67420
Dnajc1	DnaJ homolog subfamily C member 1	2599.19	-0.316083	0.0838499	-3.76963	0.00016349	0.00170285	13418
Mplkip	M-phase-specific PLK1-interacting protein	726.017	-0.315838	0.0967321	-3.26508	0.00109433	0.00854304	66308
Dcaf4	DDB1 and CUL4-associated factor 4	1317.38	-0.315563	0.0863916	-3.6527	0.000259492	0.00253569	73828
Gpx1	Glutathione peroxidase 1	4755.11	-0.315379	0.0787051	-4.0071	6.14688e-05	0.000730527	14775
Wdr44	WD repeat-containing protein 44	1100.82	-0.315173	0.0874462	-3.60419	0.00031313	0.00297917	72404
Ssbp2	Single-stranded DNA-binding protein 2	4356.78	-0.315148	0.0615856	-5.11723	3.10058e-07	6.62433e-06	66970
Trak1	Trafficking kinesin-binding protein 1	5554.74	-0.314835	0.0849203	-3.70742	0.000209385	0.00210123	67095
Ccdc126	Coiled-coil domain-containing protein 126	643.505	-0.314764	0.0816429	-3.85537	0.000115553	0.00127233	57895
Nfat5	Nuclear factor of activated T-cells 5	3087.22	-0.314695	0.0802309	-3.92236	8.76852e-05	0.00100173	54446
Rpe	Ribulose-phosphate 3-epimerase	1775.85	-0.31354	0.0924216	-3.39249	0.000692601	0.00581188	66646
Eef1akmt2	EEF1A lysine methyltransferase 2	1557.73	-0.31346	0.0699262	-4.48272	7.36966e-06	0.000112807	72096
Cyb5d2	Neuferricin	822.553	-0.313412	0.0863391	-3.63001	0.000283406	0.00273297	192986
Sash1	SAM and SH3 domain-containing protein 1	3302.46	-0.313382	0.0881838	-3.55374	0.000379801	0.0034927	70097
Camk2b	Calcium/calmodulin-dependent protein kinase type II subunit beta	47695.9	-0.312669	0.0781282	-4.002	6.28084e-05	0.000743161	12323
Sowaha	Ankyrin repeat domain-containing protein SOWAHA	8666.98	-0.312531	0.0807418	-3.87074	0.000108504	0.00120541	237761
Spcs3	Signal peptidase complex subunit 3	5027.67	-0.312499	0.0698198	-4.47579	7.61277e-06	0.000116161	76687
Gsg1l	Germ cell-specific gene 1-like protein	4010.32	-0.311273	0.0726665	-4.28359	1.83904e-05	0.000253286	269994
Usf3	Gene model 608,	2538.05	-0.311227	0.088695	-3.50896	0.000449869	0.00404765	207806
Ttc39b	Tetratricopeptide repeat protein 39B	4764.37	-0.311156	0.0708202	-4.39361	1.11484e-05	0.000162425	69863
Drp2	Dystrophin-related protein 2	3737.67	-0.3111	0.08863	-3.5101	0.000447934	0.00403625	13497
Cap1	Adenylyl cyclase-associated protein 1	15180.6	-0.30971	0.0617617	-5.0146	5.3143e-07	1.08096e-05	12331
Jak2	Tyrosine-protein kinase JAK2	5703.31	-0.309172	0.0534474	-5.7846	7.26862e-09	2.18646e-07	16452
Klf13	Krueppel-like factor 13	2843.27	-0.308954	0.094877	-3.25636	0.0011285	0.00877014	50794
Mus81	Crossover junction endonuclease MUS81	1728.55	-0.308901	0.0664867	-4.64606	3.38331e-06	5.66265e-05	71711
Top1	DNA topoisomerase 1	4344	-0.308779	0.0722695	-4.2726	1.93208e-05	0.000264594	21969
Agfg2	Arf-GAP domain and FG repeat-containing protein 2	3830.31	-0.308706	0.0867337	-3.55923	0.000371937	0.00343857	231801
D5Ertd579e	Uncharacterized protein KIAA0232	12901.1	-0.308377	0.0587221	-5.25147	1.50892e-07	3.44602e-06	320661
Usp48	Ubiquitin carboxyl-terminal hydrolase 48	7591.2	-0.308129	0.0607975	-5.06812	4.01773e-07	8.3911e-06	170707
Crebbp	Histone lysine acetyltransferase CREBBP	4629.4	-0.30718	0.0820322	-3.74463	0.000180663	0.00185613	12914
Setd4	SET domain-containing protein 4	776.157	-0.307167	0.0820677	-3.74286	0.000181941	0.00186688	224440
Cacna1e	Voltage-dependent R-type calcium channel subunit alpha-1E	26668.4	-0.306836	0.0881331	-3.4815	0.000498605	0.00441228	12290
Ogt	UDP-N-acetylglucosamine--peptide N-acetylglucosaminyltransferase 110 kDa subunit	17846.9	-0.306675	0.0546335	-5.61331	1.98487e-08	5.39372e-07	108155
Ccnd2	G1/S-specific cyclin-D2	2776.22	-0.306625	0.0793712	-3.86318	0.000111921	0.00123655	12444
Tra2a	Transformer-2 protein homolog alpha	3736.27	-0.306589	0.0736528	-4.16263	3.14607e-05	0.000402581	101214
Ckmt1	Creatine kinase U-type, mitochondrial	7248.74	-0.306098	0.0656233	-4.66447	3.09415e-06	5.2257e-05	12716
Iah1	Isoamyl acetate-hydrolyzing esterase 1 homolog	850.884	-0.305999	0.0872051	-3.50896	0.000449865	0.00404765	67732
Nbea	Neurobeachin	30270.2	-0.305945	0.0700242	-4.36914	1.24738e-05	0.000178825	26422
Selenom	Selenoprotein M	2734.78	-0.305818	0.0872473	-3.50518	0.000456297	0.00409482	114679
Sema3a	Semaphorin-3A	2892.79	-0.305724	0.0783997	-3.89956	9.63671e-05	0.00108908	20346
Gramd1b	Protein Aster-B	5190.75	-0.305301	0.0563123	-5.42157	5.9079e-08	1.46546e-06	235283
Cdc73	Parafibromin	3682.81	-0.304858	0.0596279	-5.11267	3.1763e-07	6.76817e-06	214498
Socs7	Suppressor of cytokine signaling 7	8158.96	-0.303986	0.0709336	-4.28551	1.82321e-05	0.000251536	192157
Trpc1	Short transient receptor potential channel 1	5184.75	-0.303648	0.0598042	-5.07737	3.82692e-07	8.02724e-06	22063
Chmp1b	Charged multivesicular body protein 1b-1	1149.52	-0.303041	0.0882624	-3.43341	0.000596033	0.00512809	67064
Zfp512b	Zinc finger protein 512B	2488.83	-0.302999	0.0894275	-3.3882	0.000703521	0.0058915	269401
Smarca1	Probable global transcription activator SNF2L1	8166.07	-0.302934	0.0619823	-4.88744	1.02158e-06	1.94389e-05	93761
Ccdc97	Coiled-coil domain-containing protein 97	864.264	-0.302789	0.0761903	-3.97411	7.0643e-05	0.000824964	52132
Dclk1	Serine/threonine-protein kinase DCLK1	32128.5	-0.301929	0.0851451	-3.54605	0.000391051	0.00358377	13175
Spata2l	Spermatogenesis-associated protein 2-like protein	2567.85	-0.301535	0.0932768	-3.23269	0.0012263	0.00940334	78779
Ranbp2	E3 SUMO-protein ligase RanBP2	26245.9	-0.301359	0.0710145	-4.24362	2.19942e-05	0.000294861	19386
Rtn4rl1	Reticulon-4 receptor-like 1	1417.93	-0.30112	0.0752807	-3.99996	6.33521e-05	0.00074831	237847
Amer2	APC membrane recruitment protein 2	5260.91	-0.30046	0.064646	-4.64777	3.35545e-06	5.62381e-05	72125
Cdk8	Cyclin-dependent kinase 8	2588.78	-0.30019	0.0643986	-4.66144	3.14002e-06	5.29946e-05	264064
BC005537	Uncharacterized protein C6orf62 homolog	6505.97	-0.299537	0.0598707	-5.00307	5.64238e-07	1.13528e-05	79555
Fcho2	F-BAR domain only protein 2	1583.29	-0.299505	0.0716066	-4.18264	2.88138e-05	0.000372653	218503
Tcaf1	TRPM8 channel-associated factor 1	19808.4	-0.299251	0.057022	-5.248	1.53757e-07	3.50481e-06	77574
Mbd5	Methyl-CpG-binding domain protein 5	2922.99	-0.298763	0.0786296	-3.79962	0.000144915	0.00154396	109241
Tbc1d30	TBC1 domain family member 30	5951.25	-0.298714	0.0894376	-3.33992	0.00083803	0.00682713	74694
Ahctf1	Protein ELYS	7444.1	-0.297965	0.0541996	-5.49755	3.85104e-08	9.91879e-07	226747
Cdh20	Cadherin-20	707.269	-0.297246	0.0869049	-3.42036	0.000625373	0.00533686	23836
Zfp286	Zinc finger protein 286	1008.67	-0.297198	0.072761	-4.08458	4.41575e-05	0.000543486	192651
Gmcl1	Germ cell-less protein-like 1	1655.01	-0.29695	0.0791683	-3.75087	0.000176224	0.00181748	23885
Ep300	Histone acetyltransferase p300	3044.34	-0.296798	0.0699788	-4.24125	2.22277e-05	0.000297661	328572
Galnt13	Polypeptide N-acetylgalactosaminyltransferase 13	8418.08	-0.296786	0.0781619	-3.79707	0.000146418	0.00155654	271786
Prr14l	Proline-rich 14-like	4163.57	-0.296072	0.0611163	-4.84439	1.26998e-06	2.37728e-05	215476
Ogfrl1	Opioid growth factor receptor-like protein 1	3977.91	-0.295591	0.078907	-3.74607	0.000179625	0.00184704	70155
Rmnd5b	E3 ubiquitin-protein transferase RMND5B	2507.19	-0.294893	0.0781701	-3.77246	0.000161649	0.0016873	66089
Nat14	N-acetyltransferase 14	2780.86	-0.294843	0.0674119	-4.37376	1.22125e-05	0.000175601	269854
Srsf7	Serine/arginine-rich splicing factor 7	8550.85	-0.294634	0.0589858	-4.995	5.8836e-07	1.17891e-05	225027
Ncoa3	Nuclear receptor coactivator	2443.78	-0.293429	0.0805377	-3.64337	0.000269093	0.00261786	17979
Ofd1	Oral-facial-digital syndrome 1 protein homolog	1065.69	-0.293052	0.0762697	-3.84231	0.000121882	0.00133441	237222
Strbp	Spermatid perinuclear RNA-binding protein	19094.7	-0.292794	0.0768234	-3.81126	0.00013826	0.00148153	20744
Nebl	LIM zinc-binding domain-containing Nebulette	8819.83	-0.292083	0.0547017	-5.33957	9.31692e-08	2.2332e-06	74103
Zfp532	Zinc finger protein 532	3029.76	-0.292037	0.0695907	-4.19649	2.7108e-05	0.000353808	328977
Izumo4	Izumo sperm-egg fusion protein 4	1721.68	-0.292019	0.0904131	-3.22983	0.00123866	0.00948603	71564
Ankrd10	Ankyrin repeat domain-containing protein 10	4686.84	-0.291691	0.0765019	-3.81286	0.000137367	0.00147561	102334
Osbpl1a	Oxysterol-binding protein-related protein 1	8444.55	-0.29129	0.0877465	-3.31968	0.000901207	0.00726281	64291
Daam2	Disheveled-associated activator of morphogenesis 2	2749.29	-0.291288	0.0683765	-4.26005	2.04379e-05	0.000276913	76441
Arhgap21	Rho GTPase-activating protein 21	4928.12	-0.291276	0.0736485	-3.95494	7.65536e-05	0.00088671	71435
Ntrk3	NT-3 growth factor receptor	12233.8	-0.291009	0.0783316	-3.71509	0.000203128	0.00204608	18213
Phf2	Lysine-specific demethylase PHF2	897.873	-0.290838	0.088321	-3.29297	0.000991368	0.00787138	18676
Fnip2	Folliculin-interacting protein 2	1388.5	-0.290776	0.0839908	-3.462	0.00053617	0.00469319	329679
Myrf	Myelin regulatory factor	821.824	-0.290589	0.0862211	-3.37028	0.000750923	0.00623235	225908
Hdac4	Histone deacetylase 4	2651.01	-0.290478	0.0895578	-3.24346	0.00118085	0.00912136	208727
Grik5	Glutamate receptor ionotropic, kainate 5	4967.38	-0.290395	0.0812747	-3.573	0.000352909	0.00329159	14809
Tbck	TBC domain-containing protein kinase-like protein	4183.84	-0.290245	0.0583408	-4.97499	6.52499e-07	1.29244e-05	271981
Ypel2	Protein yippee-like 2	9709.98	-0.289542	0.0788084	-3.67399	0.00023879	0.00235336	77864
Nt5c3b	7-methylguanosine phosphate-specific 5'-nucleotidase	1258.68	-0.28905	0.0757383	-3.81643	0.000135399	0.00145863	68106
Tmem263	Transmembrane protein 263	4979.17	-0.28799	0.0701011	-4.10821	3.98738e-05	0.000497087	103266
Igsf3	Immunoglobulin superfamily member 3	708.808	-0.28783	0.0788936	-3.64833	0.000263946	0.00257504	78908
Dgki	Diacylglycerol kinase iota	16378.5	-0.287627	0.0864611	-3.32667	0.000878919	0.00711368	320127
Etv1	ETS translocation variant 1	2683.57	-0.287153	0.0825913	-3.47679	0.00050745	0.00447744	14009
Eefsec	Selenocysteine-specific elongation factor	780.432	-0.286806	0.0878258	-3.26562	0.00109226	0.00852964	65967
Rbm28	RNA-binding protein 28	2957.65	-0.286255	0.0715754	-3.99936	6.35146e-05	0.000749683	68272
Dph6	Diphthine--ammonia ligase	1196.86	-0.286218	0.0889744	-3.21686	0.001296	0.00983488	66632
Rps6ka3	Ribosomal protein S6 kinase alpha-3	4950.24	-0.285613	0.0738084	-3.86965	0.000108992	0.00120916	110651
Cdc7	Cell division cycle 7-related protein kinase	1183.16	-0.284653	0.0825542	-3.44808	0.000564596	0.00490296	12545
Cttnbp2nl	CTTNBP2 N-terminal-like protein	1349.73	-0.284573	0.0836706	-3.40111	0.00067112	0.0056608	80281
Nars2	Probable asparagine--tRNA ligase, mitochondrial	1436.46	-0.284539	0.0808103	-3.52107	0.000429801	0.003899	244141
Gpsm2	G-protein-signaling modulator 2	905.272	-0.284185	0.0751736	-3.78038	0.000156589	0.00164872	76123
Tcaim	T-cell activation inhibitor, mitochondrial	1561.72	-0.283232	0.0720708	-3.92992	8.49748e-05	0.000973988	382117
Gpatch8	G patch domain-containing protein 8	2748.35	-0.282097	0.0811998	-3.4741	0.000512561	0.00451925	237943
Smpd3	Sphingomyelin phosphodiesterase 3	9181.89	-0.281859	0.0748888	-3.76369	0.000167423	0.00173653	58994
Ptk2b	Protein-tyrosine kinase 2-beta	15668.6	-0.28181	0.0636008	-4.43092	9.38337e-06	0.000139831	19229
Actl6b	Actin-like protein 6B	2707.09	-0.281701	0.0790599	-3.56314	0.000366452	0.00339825	83766
Nnt	NAD(P) transhydrogenase, mitochondrial	1654.59	-0.281578	0.0745115	-3.77899	0.000157467	0.00165391	18115
Dgkh	Diacylglycerol kinase eta	17525.6	-0.281206	0.078218	-3.59515	0.000324201	0.00307001	380921
Tmem121b	Transmembrane protein 121B	3231.33	-0.280875	0.0752839	-3.73088	0.000190813	0.00193818	94047
Zeb1	Zinc finger E-box-binding homeobox 1	7156.82	-0.280858	0.0598933	-4.68931	2.74129e-06	4.70867e-05	21417
Ptn	Pleiotrophin	12992.9	-0.279624	0.0649593	-4.3046	1.67285e-05	0.000232918	19242
Dag1	Dystroglycan	2973.61	-0.279519	0.079799	-3.50279	0.000460412	0.00412716	13138
Zxdb	Zinc finger X-linked protein ZXDB	1238.86	-0.279283	0.0766495	-3.64363	0.000268816	0.00261623	668166
Adora2a	Adenosine receptor A2a	16019.1	-0.279222	0.0847396	-3.29506	0.000984016	0.00782329	11540
Dennd4a	DENN/MADD domain-containing 4A	4691.59	-0.279067	0.0655008	-4.26052	2.03952e-05	0.000276645	102442
Ppp3cb	Serine/threonine-protein phosphatase 2B catalytic subunit beta isoform	8512.58	-0.278843	0.0697888	-3.99552	6.45518e-05	0.000760441	19056
Ppm1f	Protein phosphatase 1F	5757.79	-0.278538	0.0765301	-3.63959	0.000273077	0.0026513	68606
Chrm1	Muscarinic acetylcholine receptor M1	3847.46	-0.278535	0.081967	-3.39813	0.000678475	0.00570944	12669
Cog5	Conserved oligomeric Golgi complex subunit 5	3246.34	-0.278377	0.0706592	-3.93971	8.15791e-05	0.000936842	238123
Kbtbd8	Kelch repeat and BTB domain-containing protein 8	951.66	-0.278039	0.0771476	-3.60398	0.000313376	0.00298034	243574
Man2a2	Alpha-mannosidase 2x	13787.4	-0.277507	0.0688617	-4.02992	5.57953e-05	0.000671307	140481
Zfp280d	Zinc finger protein 280D	3333.21	-0.276219	0.0627778	-4.39994	1.08278e-05	0.00015823	235469
Zcchc8	Zinc finger CCHC domain-containing protein 8	1731.85	-0.27556	0.076861	-3.58518	0.000336849	0.00316992	70650
Zfp644	Zinc finger protein 644	13693.3	-0.275192	0.0779526	-3.53025	0.000415169	0.00377902	52397
Dlg2	Disks large homolog 2	24818.4	-0.273929	0.0632452	-4.33122	1.48283e-05	0.000209232	23859
Epb41l1	Band 4.1-like protein 1	22337.5	-0.273781	0.0809228	-3.38324	0.00071636	0.00598452	13821
Rpl31	60S ribosomal protein L31	11117	-0.273334	0.0802236	-3.40715	0.000656441	0.00555884	114641
Slc4a4	Electrogenic sodium bicarbonate cotransporter 1	18343.8	-0.273234	0.0620651	-4.40238	1.07068e-05	0.000156936	54403
Mgat4a	Alpha-1,3-mannosyl-glycoprotein 4-beta-N-acetylglucosaminyltransferase A	4033.78	-0.273169	0.0613343	-4.45378	8.43725e-06	0.000127694	269181
Sptbn4	Spectrin beta chain	9013.05	-0.271946	0.0730713	-3.72166	0.000197921	0.0020003	80297
Rc3h2	Roquin-2	11259.5	-0.27171	0.0534653	-5.08198	3.73516e-07	7.86204e-06	319817
Rtn2	Reticulon-2	2537.95	-0.271088	0.0705113	-3.84461	0.000120745	0.0013235	20167
Slc12a6	Solute carrier family 12 member 6	3391.38	-0.270899	0.061545	-4.40165	1.07432e-05	0.000157374	107723
Zfp346	Zinc finger protein 346	1490.34	-0.270649	0.0813486	-3.32703	0.00087778	0.00710894	26919
Naa60	N-alpha-acetyltransferase 60	1300.04	-0.270627	0.080925	-3.34417	0.000825301	0.00673411	74763
Ppp2r2d	Serine/threonine-protein phosphatase 2A 55 kDa regulatory subunit B delta isoform	3057.18	-0.270267	0.0676177	-3.99699	6.41535e-05	0.000756485	52432
Lcor	Ligand-dependent corepressor	2492.04	-0.270071	0.0627241	-4.30569	1.66463e-05	0.000232041	212391
Slc25a14	Brain mitochondrial carrier protein 1	3204.35	-0.26998	0.0770402	-3.5044	0.000457641	0.00410472	20523
Acvr1	Activin receptor type-1	1123.24	-0.269669	0.0788316	-3.42083	0.000624304	0.00532962	11477
Senp7	Sentrin-specific protease 7	2550.8	-0.269323	0.0668698	-4.02758	5.63538e-05	0.000676386	66315
Spop	Speckle-type POZ protein	6316.78	-0.269259	0.0609245	-4.41955	9.89045e-06	0.000146337	20747
Cdh8	Cadherin-8	9251.65	-0.269213	0.0740287	-3.6366	0.000276256	0.00267786	12564
Fpgt	Fucose-1-phosphate guanylyltransferase	2280.21	-0.268246	0.0746087	-3.59538	0.000323924	0.00306979	75540
Hmgn1	Non-histone chromosomal protein HMG-14	5978.66	-0.26812	0.0688461	-3.89449	9.84066e-05	0.00110902	15312
Fig4	Polyphosphoinositide phosphatase	4158.67	-0.267965	0.0716918	-3.73773	0.000185689	0.0018989	103199
Hecw2	E3 ubiquitin-protein ligase HECW2	8226.64	-0.267879	0.0545178	-4.9136	8.942e-07	1.71683e-05	329152
Tfdp2	Transcription factor Dp-2	4645.08	-0.267676	0.07367	-3.63345	0.000279659	0.00270542	211586
Ptprd	Receptor-type tyrosine-protein phosphatase delta	11927.3	-0.266005	0.063302	-4.20215	2.6439e-05	0.000346555	19266
Git1	ARF GTPase-activating protein GIT1	4860.55	-0.265521	0.0823765	-3.22326	0.00126739	0.00966325	216963
Hip1	Huntingtin-interacting protein 1	3430.2	-0.264944	0.0706718	-3.74894	0.000177587	0.00182841	215114
Arpc2	Actin-related protein 2/3 complex subunit 2	5892.23	-0.264889	0.0529522	-5.00242	5.66137e-07	1.13816e-05	76709
Fam162a	Protein FAM162A	1238.2	-0.264535	0.0715262	-3.69844	0.000216933	0.00216709	70186
Msl1	Male-specific lethal 1 homolog	5410.74	-0.264302	0.0688297	-3.83994	0.000123065	0.00134614	74026
Ubn2	Ubinuclein-2	5094.66	-0.263958	0.0684659	-3.85532	0.00011558	0.00127233	320538
Epha4	Ephrin type-A receptor 4	19941.4	-0.263894	0.0698836	-3.77619	0.000159243	0.00166722	13838
Atxn1	Ataxin-1	12788	-0.26389	0.0735717	-3.58685	0.0003347	0.00315215	20238
Frrs1l	DOMON domain-containing protein FRRS1L	17746.2	-0.263506	0.0692351	-3.80597	0.000141252	0.00150758	230235
Bicral	BRD4-interacting chromatin-remodeling complex-associated protein-like	1480.77	-0.26317	0.0702726	-3.74498	0.000180405	0.00185427	210982
Ncl	Nucleolin	4506.83	-0.263103	0.077251	-3.40582	0.000659653	0.00558213	17975
Ctdsp2	Carboxy-terminal domain RNA polymerase II polypeptide A small phosphatase 2	3266.89	-0.262321	0.073854	-3.55188	0.000382484	0.00351058	52468
mt-Cytb	Cytochrome b	19442.5	-0.262315	0.0640805	-4.09352	4.2487e-05	0.000524795	NA
Uhrf2	E3 ubiquitin-protein ligase UHRF2	4668.35	-0.262215	0.0606806	-4.32123	1.55159e-05	0.000217538	109113
Arhgef9	Rho guanine nucleotide exchange factor 9	27007.7	-0.26214	0.0526222	-4.98154	6.30795e-07	1.25253e-05	236915
Clk1	Dual specificity protein kinase CLK1	13746.7	-0.261587	0.062737	-4.16957	3.05169e-05	0.000392371	12747
Drd1	D(1A) dopamine receptor	27980.5	-0.261178	0.0788547	-3.31214	0.00092586	0.00743177	13488
Agtpbp1	Cytosolic carboxypeptidase 1	14890.5	-0.261079	0.0742885	-3.5144	0.000440755	0.00398521	67269
Ppm1k	Protein phosphatase 1K, mitochondrial	8181.39	-0.2605	0.0646488	-4.02946	5.59045e-05	0.000671993	243382
Ankrd17	Ankyrin repeat domain-containing protein 17	9361.74	-0.26049	0.0700596	-3.71813	0.000200707	0.00202507	81702
Rasl10b	Ras-like protein family member 10B	15495.1	-0.259574	0.0677681	-3.83033	0.000127969	0.00139007	276952
Srr	Serine racemase	1743.96	-0.259462	0.0744406	-3.48549	0.000491228	0.00435656	27364
Dnajc2	DnaJ homolog subfamily C member 2	2560.07	-0.259174	0.0720921	-3.59503	0.000324351	0.00307023	22791
Osgep	Probable tRNA N6-adenosine threonylcarbamoyltransferase	1501.48	-0.259155	0.0780138	-3.32191	0.000894036	0.00720982	66246
Fam8a1	Family with sequence similarity 8, member A1	4809.4	-0.25854	0.0529556	-4.8822	1.04908e-06	1.99153e-05	97863
Gnao1	Guanine nucleotide-binding protein G(o) subunit alpha	9907	-0.258016	0.0683513	-3.77484	0.000160109	0.00167412	14681
Chn1	N-chimaerin	29192.4	-0.258013	0.0593975	-4.34383	1.40018e-05	0.000198392	108699
Chordc1	Cysteine and histidine-rich domain-containing protein 1	4943.3	-0.257969	0.0744521	-3.46489	0.000530439	0.00465312	66917
Srf	Serum response factor	2054.09	-0.257471	0.0786829	-3.27226	0.00106692	0.00835877	20807
Caly	Neuron-specific vesicular protein calcyon	6502.21	-0.257219	0.0593266	-4.33564	1.45336e-05	0.000205432	68566
Mbtd1	MBT domain-containing protein 1	2039.51	-0.256748	0.0597888	-4.29424	1.75292e-05	0.000242669	103537
Chtf8	Decreased expression in renal and prostate cancer protein	4637.14	-0.256686	0.0512674	-5.00682	5.53377e-07	1.11995e-05	214987
Yipf1	Protein YIPF1	1905.22	-0.256292	0.0737976	-3.4729	0.000514867	0.00453627	230584
Smg5	Protein SMG5	8977.5	-0.256245	0.0738431	-3.47013	0.000520207	0.00457332	229512
Dhx32	Putative pre-mRNA-splicing factor ATP-dependent RNA helicase DHX32	3121.13	-0.255777	0.0794225	-3.22045	0.00127988	0.00974006	101437
Carhsp1	Calcium-regulated heat stable protein 1	7506.71	-0.255264	0.0733507	-3.48004	0.000501335	0.00442833	52502
Ccnl1	Cyclin-L1	3035.35	-0.254972	0.0702023	-3.63196	0.000281272	0.00271776	56706
Isyna1	Inositol-3-phosphate synthase 1	3058.83	-0.254885	0.0677453	-3.7624	0.00016829	0.00174383	71780
Cnot6	CCR4-NOT transcription complex subunit 6	4216.7	-0.2545	0.0539523	-4.71712	2.39206e-06	4.18611e-05	104625
Ppp1r7	Protein phosphatase 1 regulatory subunit 7	10399.4	-0.254412	0.0662885	-3.83795	0.000124067	0.00135588	66385
Arl3	ADP-ribosylation factor-like protein 3	2866.3	-0.254167	0.0644714	-3.94233	8.06937e-05	0.000928438	56350
Celf1	CUGBP Elav-like family member 1	3452.3	-0.254147	0.0565518	-4.49406	6.98787e-06	0.000107576	13046
Rpgrip1l	Protein fantom	2462.32	-0.253259	0.0608105	-4.16472	3.11741e-05	0.000399759	244585
Uba6	Ubiquitin-like modifier-activating enzyme 6	2805.29	-0.25195	0.064836	-3.88596	0.000101927	0.00114284	231380
Chd2	Chromodomain-helicase-DNA-binding protein 2	5553.41	-0.251869	0.0570652	-4.41371	1.01614e-05	0.000149486	244059
Bptf	Bromodomain PHD finger transcription factor	6102.77	-0.251437	0.0610422	-4.11908	3.80395e-05	0.000476924	207165
Taok1	Serine/threonine-protein kinase TAO1	23690.7	-0.249981	0.053195	-4.69934	2.61001e-06	4.53144e-05	216965
Tnik	Traf2 and NCK-interacting protein kinase	15258.4	-0.249951	0.0705721	-3.54179	0.000397429	0.00363671	665113
Kctd12	BTB/POZ domain-containing protein KCTD12	2215.96	-0.249355	0.0713972	-3.49251	0.00047851	0.00426253	239217
Mink1	Misshapen-like kinase 1	14435.3	-0.249264	0.0734314	-3.39452	0.000687499	0.00577733	50932
Zfp68	Zinc finger protein 68	3523.17	-0.248712	0.0597212	-4.16456	3.1196e-05	0.000399828	24135
Actr3	Actin-related protein 3	17330.2	-0.247928	0.0577435	-4.29361	1.75789e-05	0.000243219	74117
Ankrd50	Ankyrin repeat domain 50	4650.93	-0.247815	0.0614224	-4.0346	5.46958e-05	0.000660748	99696
Arap2	Arf-GAP with Rho-GAP domain, ANK repeat and PH domain-containing protein 2	6984.62	-0.24772	0.0765171	-3.23745	0.00120602	0.00928314	212285
Mob1b	MOB kinase activator 1B	1893.51	-0.247096	0.0756563	-3.26603	0.00109068	0.00852101	68473
Mbtps1	Membrane-bound transcription factor site-1 protease	7548.65	-0.246947	0.0677947	-3.64257	0.000269926	0.00262492	56453
Nap1l2	Nucleosome assembly protein 1-like 2	5574.72	-0.246758	0.0573367	-4.30366	1.67998e-05	0.000233647	17954
Slk	STE20-like serine/threonine-protein kinase	12522	-0.246541	0.0557849	-4.4195	9.89298e-06	0.000146337	20874
Zfp942	Zinc finger protein 942	1394.55	-0.24563	0.0708285	-3.46796	0.000524427	0.0046054	73233
Emsy	BRCA2-interacting transcriptional repressor EMSY	3187.81	-0.245593	0.0660696	-3.71718	0.00020146	0.00203182	233545
Ankrd63	Ankyrin repeat domain-containing protein 63	8117.49	-0.245428	0.0726669	-3.37744	0.000731634	0.00609947	383787
Kidins220	Kinase D-interacting substrate 220	33581.6	-0.245325	0.0693076	-3.53966	0.000400638	0.0036633	77480
Rbm15	RNA-binding protein 15	2764.35	-0.245281	0.0621074	-3.94931	7.83779e-05	0.000905671	229700
Reep1	Receptor expression-enhancing protein 1	7450.64	-0.244428	0.0574263	-4.25638	2.07766e-05	0.000281345	52250
Arhgef7	Rho guanine nucleotide exchange factor 7	3681.46	-0.244238	0.0697612	-3.50106	0.000463418	0.00415102	54126
Fam120a	Constitutive coactivator of PPAR-gamma-like protein 1	7522.31	-0.243628	0.05867	-4.15252	3.28833e-05	0.00041857	218236
Setd2	Histone-lysine N-methyltransferase SETD2	5119.04	-0.243272	0.0589057	-4.12985	3.62999e-05	0.0004582	235626
Gabra4	Gamma-aminobutyric acid receptor subunit alpha-4	11187.2	-0.242801	0.0510631	-4.75492	1.98528e-06	3.54871e-05	14397
Cdk17	Cyclin-dependent kinase 17	26813.5	-0.241537	0.0608107	-3.97195	7.1287e-05	0.000832083	237459
Zmym2	Zinc finger MYM-type protein 2	7792.96	-0.241484	0.0573219	-4.21277	2.52255e-05	0.00033283	76007
Zbtb37	Zinc finger and BTB domain-containing 37	2321.12	-0.241379	0.0675722	-3.57216	0.000354047	0.00329966	240869
Ddx6	Probable ATP-dependent RNA helicase DDX6	17917.6	-0.241194	0.0632714	-3.81206	0.000137813	0.00147846	13209
Lrrc8d	Volume-regulated anion channel subunit LRRC8D	942.542	-0.240443	0.0730726	-3.29046	0.00100024	0.00793139	231549
Recql5	ATP-dependent DNA helicase Q5	1554.68	-0.240198	0.0729616	-3.29211	0.000994394	0.00789282	170472
Krit1	Krev interaction trapped protein 1	5552.15	-0.239829	0.0540293	-4.43887	9.04306e-06	0.00013559	79264
Hdac5	Histone deacetylase 5	6395.57	-0.239374	0.0668463	-3.58096	0.000342328	0.00321068	15184
Casc3	Protein CASC3	1245.37	-0.238707	0.0728396	-3.27716	0.00104857	0.00824436	192160
Glud1	Glutamate dehydrogenase 1, mitochondrial	10378.2	-0.238312	0.0691644	-3.44559	0.000569821	0.00493947	14661
Phc3	Polyhomeotic-like protein 3	5088.63	-0.238308	0.0633182	-3.76366	0.000167442	0.00173653	241915
Nhp2	H/ACA ribonucleoprotein complex subunit 2	2297.87	-0.237982	0.0715315	-3.32696	0.000877999	0.00710894	52530
Alg1	Chitobiosyldiphosphodolichol beta-mannosyltransferase	1731.11	-0.237022	0.0705392	-3.36015	0.000779011	0.00641703	208211
Paxbp1	PAX3- and PAX7-binding protein 1	3631.01	-0.236643	0.0664458	-3.56144	0.00036883	0.00341507	67367
Zfx	Zinc finger X-chromosomal protein	2763.52	-0.236458	0.0610114	-3.87564	0.000106346	0.00118361	22764
Kmt2e	Inactive histone-lysine N-methyltransferase 2E	4316.35	-0.235697	0.0712271	-3.30909	0.000936008	0.00749333	69188
Camkk2	Calcium/calmodulin-dependent protein kinase kinase 2	12360.7	-0.23558	0.0599998	-3.92634	8.62481e-05	0.000986713	207565
Ankrd12	Ankyrin repeat domain 12	15380.9	-0.235326	0.069199	-3.40071	0.000672101	0.00566368	106585
Lpgat1	Acyl-CoA:lysophosphatidylglycerol acyltransferase 1	12423.4	-0.234377	0.0708139	-3.30976	0.000933751	0.00748348	226856
Gm15446	Predicted gene 15446	1706.82	-0.234128	0.0688214	-3.40196	0.000669044	0.00564775	100642166
Umps	Uridine 5'-monophosphate synthase	1237.94	-0.234113	0.0674599	-3.4704	0.000519693	0.00457046	22247
Vti1b	Vesicle transport through interaction with t-SNAREs homolog 1B	11162	-0.233825	0.0600732	-3.89233	9.92872e-05	0.00111791	53612
Psip1	PC4 and SFRS1-interacting protein	8543.53	-0.233588	0.0581252	-4.0187	5.85206e-05	0.000698546	101739
Ralgps2	Ras-specific guanine nucleotide-releasing factor RalGPS2	4928.8	-0.233559	0.0700549	-3.33395	0.000856232	0.00695131	78255
Dennd6a	Protein DENND6A	1513.32	-0.232331	0.0710529	-3.26983	0.00107611	0.00842528	211922
Klf9	Krueppel-like factor 9	17002.8	-0.231536	0.0548088	-4.22443	2.39549e-05	0.000318149	16601
Ptpn9	Tyrosine-protein phosphatase non-receptor type 9	1434.16	-0.230624	0.0671578	-3.43406	0.000594623	0.00512128	56294
Med13	Mediator of RNA polymerase II transcription subunit 13	8151.58	-0.23036	0.0471187	-4.88893	1.01384e-06	1.93068e-05	327987
Prpf38b	Pre-mRNA-splicing factor 38B	2970.12	-0.230318	0.0657852	-3.50107	0.000463392	0.00415102	66921
Shprh	E3 ubiquitin-protein ligase SHPRH	5662.16	-0.229709	0.0521995	-4.4006	1.07952e-05	0.000157908	268281
Add1	Alpha-adducin	19020	-0.229669	0.0666886	-3.44391	0.000573367	0.00496355	11518
Ccnt2	Cyclin-T2	6434.55	-0.229638	0.0693391	-3.31181	0.000926941	0.00743551	72949
Med1	Mediator of RNA polymerase II transcription subunit 1	3450.16	-0.22949	0.0620605	-3.69785	0.000217433	0.00217029	19014
Mtf2	Metal-response element-binding transcription factor 2	4621.74	-0.229438	0.0513175	-4.47096	7.78698e-06	0.00011852	17765
Pdpk1	3-phosphoinositide-dependent protein kinase 1	16296.2	-0.229182	0.071217	-3.21808	0.00129052	0.00979636	18607
Ralgapb	Ral GTPase-activating protein subunit beta	10473.6	-0.228894	0.0570217	-4.01416	5.96586e-05	0.00071076	228850
Tesc	Calcineurin B homologous protein 3	4109.56	-0.228037	0.0666155	-3.42318	0.000618925	0.00529304	57816
Fam120c	Constitutive coactivator of PPAR-gamma-like protein 2	3104.44	-0.227541	0.0654996	-3.47393	0.000512888	0.00452048	207375
Gpr137c	G protein-coupled receptor 137C	2987.74	-0.227344	0.063236	-3.59516	0.000324191	0.00307001	70713
Yod1	Ubiquitin thioesterase OTU1	2277.44	-0.227337	0.0675481	-3.36555	0.000763919	0.00632285	226418
Fryl	FRY-like transcription coactivator	5736.17	-0.227198	0.0614735	-3.69588	0.000219131	0.00218363	72313
B3galnt2	UDP-GalNAc:beta-1,3-N-acetylgalactosaminyltransferase 2	1442.91	-0.227089	0.0671891	-3.37985	0.000725256	0.00605256	97884
Btrc	F-box/WD repeat-containing protein 1A	5566.87	-0.226879	0.0620914	-3.65396	0.000258227	0.00252536	12234
Cpsf3	Cleavage and polyadenylation specificity factor subunit 3	4149	-0.226176	0.0582854	-3.88049	0.000104248	0.00116508	54451
Ppp1cb	Serine/threonine-protein phosphatase PP1-beta catalytic subunit	22504.3	-0.226023	0.0466702	-4.84299	1.27902e-06	2.3905e-05	19046
Arhgef17	Rho guanine nucleotide exchange factor 17	9850.93	-0.225067	0.0599386	-3.75495	0.000173374	0.00178961	207212
Zfp799	Zinc finger protein 799	2329.5	-0.224446	0.0672052	-3.3397	0.000838677	0.00682713	240064
Phf20l1	PHD finger protein 20-like protein 1	6210.95	-0.223984	0.0618037	-3.62412	0.000289945	0.00278377	239510
Purb	Transcriptional activator protein Pur-beta	32610.8	-0.223784	0.0641482	-3.48854	0.000485661	0.00431035	19291
Tdrd7	Tudor domain-containing protein 7	4699.41	-0.223267	0.0573985	-3.88978	0.000100336	0.00112694	100121
Scn3a	Sodium channel protein type 3 subunit alpha	11415.6	-0.223029	0.0673942	-3.30931	0.000935253	0.00748977	20269
Zfp638	Zinc finger protein 638	14558	-0.223005	0.0434023	-5.13809	2.77546e-07	5.99861e-06	18139
Kbtbd2	Kelch repeat and BTB	5587.9	-0.221747	0.0578721	-3.83167	0.000127274	0.00138343	210973
Casd1	N-acetylneuraminate 9-O-acetyltransferase	6101.65	-0.221727	0.0555946	-3.98827	6.65556e-05	0.000782128	213819
Spopl	Speckle-type POZ protein-like	3441.92	-0.221376	0.0667098	-3.3185	0.000905039	0.00729126	76857
Phip	PH-interacting protein	13209.1	-0.220189	0.0632623	-3.48057	0.000500352	0.00442288	83946
Dusp11	RNA/RNP complex-1-interacting phosphatase	2288.85	-0.220116	0.0591944	-3.71852	0.000200395	0.00202277	72102
Sec16a	Protein transport protein Sec16A	4454.24	-0.21984	0.0629005	-3.49505	0.000473973	0.0042299	227648
Ncor1	Nuclear receptor corepressor 1	10965.4	-0.219428	0.0567615	-3.86579	0.00011073	0.00122507	20185
Bzw2	Basic leucine zipper and W2 domain-containing protein 2	2348.96	-0.219414	0.0648061	-3.3857	0.000709977	0.00593734	66912
Tacc1	Transforming acidic coiled-coil-containing protein 1	22430	-0.2193	0.0671084	-3.26785	0.00108369	0.00847363	320165
Tmem170b	Transmembrane protein 170B	5374.13	-0.219277	0.06422	-3.41446	0.000639079	0.00543273	621976
Ric8b	Synembryn-B	11919	-0.218539	0.0652229	-3.35065	0.000806231	0.00660077	237422
Anks1b	Ankyrin repeat and sterile alpha motif domain-containing protein 1B	22593	-0.217335	0.0626586	-3.46856	0.000523253	0.00459676	77531
Rgs7	Regulator of G-protein signaling 7	1813.04	-0.217255	0.0627445	-3.46254	0.000535106	0.00468557	24012
Srsf10	Serine/arginine-rich splicing factor 10	4954.19	-0.21653	0.0598748	-3.61638	0.000298751	0.00286037	14105
Zfp871	Zinc finger protein 871	7211.14	-0.216277	0.0653679	-3.30861	0.000937595	0.00750107	208292
Tln2	Talin-2	17040.4	-0.215971	0.055588	-3.88521	0.000102243	0.00114585	70549
Ppp2r5a	Serine/threonine-protein phosphatase 2A 56 kDa regulatory subunit alpha isoform	6345.74	-0.215627	0.0658331	-3.27536	0.00105528	0.00828363	226849
Serpine2	Glia-derived nexin	13052.3	-0.215388	0.0661421	-3.25644	0.0011282	0.00877014	20720
Trim11	E3 ubiquitin-protein ligase TRIM11	2538.9	-0.215105	0.0665089	-3.23423	0.0012197	0.00936456	94091
Kdm5a	Lysine-specific demethylase 5A	6884.13	-0.215001	0.0553545	-3.88407	0.000102723	0.00114963	214899
Sfpq	Splicing factor, proline- and glutamine-rich	7233.04	-0.213316	0.0620874	-3.43574	0.000590933	0.00510054	71514
Igip	IgA-inducing protein	4463.02	-0.213248	0.0646806	-3.29694	0.000977434	0.00778118	109169
Focad	Focadhesin	5166.7	-0.212062	0.0634961	-3.33977	0.000838474	0.00682713	230393
Mllt3	Protein AF-9	3010.93	-0.210051	0.0570735	-3.68036	0.000232909	0.00230213	70122
C2cd3	C2 domain-containing protein 3	1689.95	-0.209844	0.0602123	-3.48507	0.000492005	0.00436165	277939
Ino80	Chromatin-remodeling ATPase INO80	2373.98	-0.20977	0.0597482	-3.5109	0.000446586	0.0040271	68142
Clptm1	Cleft lip and palate transmembrane protein 1 homolog	8979.07	-0.208208	0.056573	-3.68034	0.000232926	0.00230213	56457
Rbfox2	RNA binding protein fox-1 homolog 2	12499.8	-0.207944	0.0610464	-3.40633	0.00065842	0.00557364	93686
Dmtn	Dematin	12562.2	-0.207773	0.0551314	-3.76868	0.000164112	0.00170711	13829
Cipc	CLOCK-interacting pacemaker	7330.97	-0.207107	0.0641455	-3.22871	0.00124348	0.00951699	217732
Epb41l2	Band 4.1-like protein 2	4618.55	-0.205695	0.0593861	-3.4637	0.0005328	0.00467045	13822
Ncbp1	Nuclear cap-binding protein subunit 1	3576.34	-0.205611	0.0530365	-3.87679	0.000105843	0.00117935	433702
Sesn3	Sestrin-3	16323.9	-0.205369	0.0638507	-3.21639	0.00129814	0.00984218	75747
Hnrnpul2	Heterogeneous nuclear ribonucleoprotein U-like protein 2	5372.27	-0.204945	0.0608636	-3.36729	0.00075911	0.00628688	68693
Tbl1x	F-box-like/WD repeat-containing protein TBL1X	3173.4	-0.204538	0.0608318	-3.36235	0.000772828	0.00637913	21372
Gtf3c1	General transcription factor 3C polypeptide 1	12568.2	-0.202964	0.0570327	-3.55873	0.000372645	0.00344249	233863
Acin1	Apoptotic chromatin condensation inducer in the nucleus	3635.87	-0.202512	0.0616643	-3.2841	0.00102309	0.00807023	56215
Ppp1r12a	Protein phosphatase 1 regulatory subunit 12A	12738.3	-0.202361	0.043374	-4.6655	3.07869e-06	5.20687e-05	17931
Scamp1	Secretory carrier-associated membrane protein 1	15949.4	-0.201134	0.0509619	-3.94675	7.92199e-05	0.000912537	107767
Dnajc13	DnaJ heat shock protein family	5240.33	-0.200886	0.0624644	-3.21601	0.00129984	0.00984861	235567
Tcf12	Transcription factor 12	3629.53	-0.200582	0.0606084	-3.30948	0.00093468	0.00748765	21406
Klhl7	Kelch-like protein 7	9595.3	-0.199214	0.0483299	-4.12197	3.75645e-05	0.000472192	52323
Zswim5	Zinc finger SWIM domain-containing protein 5	2394.42	-0.198846	0.0593202	-3.35208	0.000802072	0.00657563	74464
Ttll7	Tubulin polyglutamylase TTLL7	21967.3	-0.197296	0.0542283	-3.63825	0.000274493	0.00266397	70892
Dynll1	Dynein light chain 1, cytoplasmic	10695	-0.196134	0.0522935	-3.75064	0.000176386	0.00181837	56455
Etnk1	Ethanolamine kinase 1	28376.4	-0.195604	0.0567156	-3.44885	0.000562975	0.00489903	75320
Pura	Transcriptional activator protein Pur-alpha	9535.28	-0.194488	0.0564708	-3.44405	0.000573079	0.00496355	19290
Thoc2	THO complex subunit 2	4598.7	-0.193918	0.0595387	-3.25701	0.00112594	0.00875874	331401
Adcy9	Adenylate cyclase type 9	5479.33	-0.193802	0.0591573	-3.27605	0.00105271	0.00827151	11515
Zfp148	Zinc finger protein 148	9645.43	-0.193656	0.0468068	-4.13735	3.51339e-05	0.000445109	22661
Itpr1	Inositol 1,4,5-trisphosphate receptor type 1	111355	-0.192292	0.0577753	-3.32827	0.000873874	0.00708503	16438
Sos2	Son of sevenless homolog 2	2401.44	-0.191333	0.0590695	-3.23912	0.00119899	0.0092392	20663
Kdm5c	Lysine-specific demethylase 5C	5830.34	-0.189327	0.0566504	-3.34203	0.000831672	0.00678152	20591
Tarsl2	Threonine--tRNA ligase 2, cytoplasmic	2795.7	-0.188424	0.0553302	-3.40544	0.000660577	0.00558799	272396
Hnrnpm	Heterogeneous nuclear ribonucleoprotein M	6077.52	-0.18679	0.0564555	-3.30861	0.000937593	0.00750107	76936
Xrn2	5'-3' exoribonuclease 2	5340.18	-0.18544	0.0521102	-3.55862	0.000372811	0.0034427	24128
Creld1	Protein disulfide isomerase Creld1	3493.6	-0.185412	0.0547509	-3.38647	0.000707989	0.00592277	171508
Snx27	Sorting nexin-27	8730.81	-0.183418	0.054411	-3.37098	0.000749015	0.00622078	76742
Ddx5	Probable ATP-dependent RNA helicase DDX5	60317.3	-0.18189	0.0481975	-3.77385	0.000160746	0.00167881	13207
Gas7	Growth arrest-specific protein 7	27000.5	-0.181698	0.0527129	-3.44694	0.000566973	0.00492184	14457
Inpp5f	Phosphatidylinositide phosphatase SAC2	11810.6	-0.18154	0.046455	-3.90786	9.31162e-05	0.00105679	101490
Mga	MAX gene-associated protein	9191.08	-0.178586	0.0517855	-3.44857	0.000563572	0.00489967	29808
Suco	SUN domain-containing ossification factor	4611.34	-0.173221	0.050298	-3.44388	0.00057342	0.00496355	226551
Wdr37	WD repeat-containing protein 37	4778.74	-0.170036	0.04748	-3.58121	0.000342006	0.00320971	207615
Tug1	Taurine upregulated gene 1	7089.45	-0.165934	0.0502949	-3.29922	0.000969556	0.00772355	544752
Insr	Insulin receptor	4909.72	-0.164024	0.0469836	-3.49109	0.000481055	0.0042789	16337
Hipk1	Homeodomain-interacting protein kinase 1	8890.67	-0.159936	0.0465615	-3.43495	0.000592672	0.00510826	15257
Bclaf1	Bcl-2-associated transcription factor 1	16368.4	-0.154463	0.0470398	-3.28367	0.00102465	0.00807991	72567
Sar1a	GTP-binding protein SAR1a	9962.15	0.152074	0.0470462	3.23244	0.00122739	0.0094087	20224
Dcaf8	DDB1- and CUL4-associated factor 8	9728.43	0.156352	0.04752	3.29024	0.00100103	0.00793505	98193
Eif4g1	Eukaryotic translation initiation factor 4 gamma 1	15883.2	0.163792	0.0489393	3.34683	0.00081741	0.00668326	208643
Strn4	Striatin-4	10126.9	0.166227	0.0482693	3.44374	0.000573724	0.0049644	97387
Elmod1	ELMO domain-containing protein 1	19107.5	0.171114	0.04999	3.42296	0.000619442	0.00529558	270162
Tusc3	Tumor suppressor candidate 3	14813.4	0.171632	0.0494722	3.46926	0.000521899	0.00458653	80286
Adarb1	Double-stranded RNA-specific editase 1	10318.2	0.172839	0.052713	3.27887	0.00104223	0.00819718	110532
Nap1l4	Nucleosome assembly protein 1-like 4	6616.29	0.175613	0.0534389	3.28625	0.00101533	0.0080221	17955
Mcrs1	Microspherule protein 1	4381.75	0.177431	0.052826	3.35878	0.00078288	0.0064445	51812
Vdac2	Voltage-dependent anion-selective channel protein 2	12399.2	0.178798	0.0521277	3.43	0.000603571	0.00518373	22334
Rapgef5	Rap guanine nucleotide exchange factor 5	9034.84	0.179911	0.0524679	3.42898	0.000605849	0.00519407	217944
Ube2q1	Ubiquitin-conjugating enzyme E2 Q1	3216.24	0.180019	0.0534302	3.36923	0.000753781	0.00625178	70093
Ctnnb1	Catenin beta-1	23466.2	0.180941	0.0501735	3.60631	0.000310585	0.00295845	12387
Plaa	Phospholipase A-2-activating protein	3381.65	0.18144	0.0535058	3.39103	0.000696305	0.00583511	18786
Ndrg2	Protein NDRG2	32337.2	0.182385	0.0567818	3.21204	0.00131796	0.00996399	29811
Tubgcp6	Gamma-tubulin complex component 6	2255.8	0.182552	0.056415	3.23588	0.0012127	0.00932566	328580
Klhdc10	Kelch domain-containing protein 10	6580.97	0.187155	0.0495371	3.77807	0.000158046	0.00165684	76788
Zfand5	AN1-type zinc finger protein 5	10798	0.187336	0.0543611	3.44615	0.000568633	0.00493094	22682
Ctbp1	C-terminal-binding protein 1	9435.22	0.189379	0.0533143	3.55213	0.000382125	0.00350862	13016
Ptpa	Serine/threonine-protein phosphatase 2A activator	7518.18	0.190308	0.0578975	3.28698	0.00101269	0.00800648	110854
Arhgef4	Rho guanine nucleotide exchange factor 4	8428.66	0.190447	0.0591131	3.22174	0.00127416	0.00970263	226970
Dnajb6	DnaJ homolog subfamily B member 6	7379.34	0.190998	0.0588741	3.24418	0.00117788	0.00910714	23950
Coa5	Cytochrome c oxidase assembly factor 5	5135.29	0.191734	0.0594286	3.22629	0.00125405	0.00957394	76178
Elp1	Elongator complex protein 1	7186.27	0.194796	0.0571246	3.41002	0.00064958	0.00551424	230233
Pcsk2	Neuroendocrine convertase 2	17671.9	0.195194	0.0588565	3.31644	0.000911719	0.00733774	18549
Retreg2	Reticulophagy regulator 2	7855.89	0.195829	0.0535386	3.65772	0.000254467	0.00249363	227298
Sars	Serine--tRNA ligase, cytoplasmic	9698.24	0.196366	0.0536882	3.65753	0.000254656	0.00249447	20226
Eif4h	Eukaryotic translation initiation factor 4H	25876.8	0.196578	0.0515574	3.8128	0.000137402	0.00147561	22384
Morf4l2	Mortality factor 4-like protein 2	13330.4	0.196812	0.0542076	3.6307	0.000282652	0.00273001	56397
Zwint	ZW10 interactor	40610.3	0.197056	0.0587686	3.35308	0.000799175	0.0065541	52696
Csnk1d	Casein kinase I isoform delta	5923.98	0.197141	0.0586183	3.36313	0.000770648	0.00636548	104318
BC005624	Telomere length and silencing protein 1 homolog	3594.6	0.197195	0.0578056	3.41134	0.000646437	0.00548949	227707
Dcaf5	DDB1- and CUL4-associated factor 5	5119.99	0.197306	0.0608778	3.24102	0.00119101	0.00918515	320808
Aagab	Alpha- and gamma-adaptin-binding protein p34	4190.64	0.198528	0.0605428	3.27913	0.00104126	0.00819528	66939
Vps28	Vacuolar protein sorting-associated protein 28 homolog	4198.31	0.198819	0.055413	3.58795	0.000333292	0.00314256	66914
Mapk9	Mitogen-activated protein kinase 9	9758.83	0.19907	0.0594933	3.34608	0.00081962	0.00669568	26420
Rad23b	UV excision repair protein RAD23 homolog B	11478	0.199332	0.0550935	3.61807	0.000296811	0.00284405	19359
Skiv2l	Uncharacterized protein	5074.77	0.199924	0.0496304	4.02825	5.61937e-05	0.000674799	108077
Ranbp3	Ran-binding protein 3	4800.73	0.201098	0.0614264	3.27381	0.00106108	0.00832105	71810
Snx17	Sorting nexin-17	4382.3	0.201608	0.0593985	3.39416	0.000688401	0.0057829	266781
Ica1l	Islet cell autoantigen 1-like protein	2849.05	0.204044	0.0620826	3.28665	0.00101388	0.00801329	70375
Glrb	Glycine receptor subunit beta	13640.5	0.204894	0.0637331	3.21488	0.00130501	0.00988464	14658
Usp47	Ubiquitin carboxyl-terminal hydrolase 47	10304.9	0.205431	0.0500287	4.10626	4.02125e-05	0.000500535	74996
Comt	Catechol O-methyltransferase	1879.77	0.206836	0.0641762	3.22294	0.00126883	0.00967092	12846
Rnf170	E3 ubiquitin-protein ligase RNF170	1881.23	0.208056	0.0619229	3.35992	0.000779648	0.00642009	77733
Usp20	Ubiquitin carboxyl-terminal hydrolase 20	4498.72	0.20907	0.0649023	3.2213	0.00127609	0.00971429	74270
Brk1	Protein BRICK1	7968.48	0.209189	0.0507583	4.12127	3.76788e-05	0.000473137	101314
Gpaa1	Glycosylphosphatidylinositol anchor attachment 1 protein	1878.22	0.209239	0.0631776	3.31192	0.000926572	0.00743502	14731
Ubl4a	Ubiquitin-like protein 4A	1851.74	0.209515	0.0636596	3.29117	0.000997715	0.00791658	27643
Fam20b	Glycosaminoglycan xylosylkinase	6109.84	0.211582	0.0520301	4.06654	4.77169e-05	0.000583435	215015
Clcn4	H(+)/Cl(-) exchange transporter 4	12411.6	0.211758	0.0597589	3.54353	0.000394806	0.00361544	12727
Rpl13	60S ribosomal protein L13	21842.9	0.212051	0.0609384	3.47976	0.000501856	0.00443132	270106
Slc9a7	Sodium/hydrogen exchanger 7	3431.16	0.212154	0.0580406	3.65526	0.00025692	0.00251424	236727
Mrps26	28S ribosomal protein S26, mitochondrial	2713.17	0.212287	0.0559185	3.79637	0.000146833	0.00155958	99045
1500011B03Rik	RIKEN cDNA 1500011B03 gene	4442.56	0.212707	0.04843	4.39204	1.1229e-05	0.000163303	66236
Ncaph2	Condensin-2 complex subunit H2	6095.31	0.213079	0.0475163	4.48435	7.31382e-06	0.000112094	52683
Tmem201	Transmembrane protein 201	2558.58	0.213423	0.0621134	3.43602	0.000590323	0.00509709	230917
Nsmaf	Protein FAN	3243.51	0.213678	0.0601374	3.55316	0.000380637	0.00349628	18201
Mtfr1l	Mitochondrial fission regulator 1-like	3937.77	0.214379	0.0513159	4.17763	2.9456e-05	0.000380146	76824
Fnta	Protein farnesyltransferase/geranylgeranyltransferase type-1 subunit alpha	3255.3	0.214678	0.0668276	3.21241	0.00131627	0.00995436	14272
Mtpn	Myotrophin	22295	0.21481	0.0484703	4.43178	9.34593e-06	0.000139526	14489
Creg1	Protein CREG1	1510.09	0.214914	0.0667577	3.21931	0.00128498	0.00976655	433375
Cul4a	Cullin-4A	5698.74	0.215269	0.0544953	3.95024	7.80734e-05	0.000902583	99375
Arl8b	ADP-ribosylation factor-like protein 8B	9941.93	0.215946	0.0599001	3.60511	0.000312024	0.00297098	67166
Fut8	Alpha-(1,6)-fucosyltransferase	3133.46	0.216545	0.0586301	3.6934	0.000221275	0.00220318	53618
Prpf40b	Pre-mRNA-processing factor 40 homolog B	2618.79	0.216666	0.0673709	3.21602	0.00129982	0.00984861	54614
Dstyk	Dual serine/threonine and tyrosine protein kinase	8605.85	0.216897	0.0597497	3.63009	0.000283318	0.00273297	213452
Saraf	Store-operated calcium entry-associated regulatory factor	14874.4	0.217413	0.0631757	3.4414	0.000578704	0.00500391	67887
Hars	Histidine--tRNA ligase, cytoplasmic	4046.24	0.217552	0.0641098	3.39343	0.000690226	0.00579622	15115
Src	Neuronal proto-oncogene tyrosine-protein kinase Src	4727.09	0.218471	0.0647403	3.37457	0.000739313	0.006155	20779
Thap12	52 kDa repressor of the inhibitor of the protein kinase	5278.03	0.220058	0.0643084	3.42191	0.00062183	0.00531224	72981
Tax1bp1	Tax1-binding protein 1 homolog	11940	0.220068	0.0619106	3.55461	0.000378541	0.00348497	52440
Hnrnph2	Heterogeneous nuclear ribonucleoprotein H2	8060.33	0.220652	0.0586311	3.7634	0.000167619	0.00173762	56258
Mccc2	Methylcrotonoyl-CoA carboxylase beta chain, mitochondrial	1857.08	0.220679	0.0661171	3.3377	0.000844734	0.00687181	78038
Afg3l2	AFG3-like protein 2	2862.48	0.220805	0.06773	3.26007	0.00111383	0.00867289	69597
Prps1	Ribose-phosphate pyrophosphokinase 1	3051.73	0.221309	0.0684743	3.23201	0.00122924	0.00941989	19139
Eri3	ERI1 exoribonuclease 3	5388.78	0.221877	0.0489536	4.53238	5.83215e-06	9.1354e-05	140546
Nemf	Nuclear export mediator factor Nemf	6983.64	0.222053	0.0609389	3.64387	0.000268567	0.0026159	66244
Zcchc17	Nucleolar protein of 40 kDa	3475.16	0.223159	0.0627162	3.55824	0.00037335	0.00344374	619605
Smim10l1	Small integral membrane protein 10-like 1	11644.9	0.22356	0.0622322	3.59235	0.000327711	0.00309839	381820
Rab2a	Ras-related protein Rab-2A	15349.2	0.224034	0.0587726	3.81188	0.000137912	0.00147846	59021
Coq9	Ubiquinone biosynthesis protein COQ9, mitochondrial	3507.44	0.224048	0.0615511	3.64003	0.00027261	0.00264782	67914
Dgkd	Diacylglycerol kinase delta	6541.97	0.224409	0.065486	3.42683	0.000610669	0.00522982	227333
Zcrb1	Zinc finger CCHC-type and RNA-binding motif-containing protein 1	1495.81	0.224862	0.0694271	3.23882	0.00120024	0.0092445	67197
Tmx4	Thioredoxin-related transmembrane protein 4	18078.5	0.225834	0.0641716	3.51922	0.000432814	0.00391898	52837
Creb3	Cyclic AMP-responsive element-binding protein 3	2735.7	0.225924	0.066974	3.37331	0.000742699	0.00617631	12913
Hk1	Hexokinase-1	9131.99	0.225952	0.070332	3.21264	0.0013152	0.00995128	15275
Camta1	Calmodulin-binding transcription activator 1	5964.34	0.226031	0.0698537	3.23578	0.0012131	0.00932579	100072
Rnf11	RING finger protein 11	11330.9	0.226436	0.0517329	4.37702	1.20313e-05	0.00017351	29864
Rps6kc1	Ribosomal protein S6 kinase delta-1	6170.59	0.227403	0.0511003	4.45012	8.58226e-06	0.000129645	320119
Rabgap1l	Rab GTPase-activating protein 1-like	9327.63	0.227583	0.0639545	3.55851	0.000372967	0.00344283	29809
Pomt2	Protein O-mannosyl-transferase 2	1746.18	0.22771	0.063301	3.59726	0.000321583	0.00304918	217734
Ensa	Alpha-endosulfine	15998.3	0.228362	0.0502051	4.54858	5.40082e-06	8.55395e-05	56205
Fem1b	Protein fem-1 homolog B	13988.6	0.228597	0.0590841	3.86901	0.000109279	0.00121178	14155
Ndfip1	NEDD4 family-interacting protein 1	19848.6	0.229294	0.0613767	3.73584	0.000187086	0.00190889	65113
Mgat3	Beta-1,4-mannosyl-glycoprotein 4-beta-N-acetylglucosaminyltransferase	7243.28	0.22985	0.0607808	3.78163	0.000155807	0.0016412	17309
Tbc1d10a	TBC1 domain family member 10A	1652.78	0.230801	0.0667826	3.456	0.000548262	0.00478984	103724
Rnf41	E3 ubiquitin-protein ligase NRDP1	4762.01	0.231508	0.0712836	3.2477	0.00116343	0.0090069	67588
Txn1	Thioredoxin	2040.02	0.231666	0.0692249	3.34657	0.000818175	0.00668725	22166
Snx11	Sorting nexin-11	1933.73	0.23174	0.0686997	3.37324	0.000742894	0.00617631	74479
Nap1l1	Nucleosome assembly protein 1-like 1	11769.1	0.232872	0.0540072	4.31187	1.61882e-05	0.000226046	53605
Cxcl14	C-X-C motif chemokine 14	2197.44	0.233061	0.0723884	3.21959	0.00128376	0.00976036	57266
Fndc4	Fibronectin type III domain-containing protein 4	3128.1	0.233156	0.0648152	3.59724	0.000321606	0.00304918	64339
Fbxo22	F-box only protein 22	1921.01	0.233239	0.0722707	3.2273	0.00124964	0.00955808	71999
Sgsm3	Small G protein signaling modulator 3	4435.6	0.233259	0.0492852	4.73283	2.21407e-06	3.89718e-05	105835
Ube2z	Ubiquitin-conjugating enzyme E2 Z	4056.27	0.233531	0.0549549	4.2495	2.14247e-05	0.000289149	268470
Epha6	Ephrin type-A receptor 6	3715.7	0.233579	0.0552192	4.23002	2.33668e-05	0.000311365	13840
Bdh1	D-beta-hydroxybutyrate dehydrogenase, mitochondrial	1661.66	0.233827	0.0710973	3.28883	0.00100605	0.00796436	71911
Spata7	Spermatogenesis-associated protein 7 homolog	1879.64	0.234021	0.0656452	3.56494	0.000363936	0.0033801	104871
Nkain2	Sodium/potassium-transporting ATPase subunit beta-1-interacting protein 2	5459.67	0.234069	0.0696983	3.35832	0.000784166	0.0064507	432450
Kcnab2	Voltage-gated potassium channel subunit beta-2	15072.9	0.234565	0.057351	4.08999	4.314e-05	0.000531503	16498
Mtmr3	Myotubularin-related protein 3	8365.92	0.234884	0.0529683	4.43444	9.23122e-06	0.00013824	74302
1110051M20Rik	UPF0705 protein C11orf49 homolog	4020.81323	0.234942	0.0536014	4.38314	1.16981e-05	0.000169413	228356
Ift22	Intraflagellar transport protein 22 homolog	2489	0.235078	0.0687448	3.41958	0.000627174	0.00534656	67286
Tmem62	Transmembrane protein 62	1528.7	0.235234	0.0659517	3.56675	0.000361433	0.00335814	96957
Cdkn2aipnl	CDKN2AIP N-terminal-like protein	2405.71	0.235493	0.0585291	4.02352	5.73344e-05	0.000685773	52626
Wars	Tryptophan--tRNA ligase, cytoplasmic	4737.62	0.236113	0.0545981	4.32457	1.52831e-05	0.000214522	22375
Vps16	Vacuolar protein sorting-associated protein 16 homolog	3915.63	0.236126	0.0637558	3.7036	0.000212563	0.0021296	80743
Maea	E3 ubiquitin-protein transferase MAEA	4251.47	0.236205	0.0587346	4.02157	5.78125e-05	0.000690808	59003
Klc1	Kinesin light chain 1	30003	0.23642	0.0711041	3.32499	0.000884218	0.00714494	16593
Fahd2a	Fumarylacetoacetate hydrolase domain-containing protein 2A	1131.75	0.236787	0.0734228	3.22498	0.00125982	0.0096116	68126
Med22	Mediator of RNA polymerase II transcription subunit 22	2631.45	0.237047	0.0564859	4.19656	2.70998e-05	0.000353808	20933
Actr3b	Actin-related protein 3B	7044.62	0.237047	0.0595522	3.98049	6.87732e-05	0.000804683	242894
Sntg1	Gamma-1-syntrophin	4044	0.23707	0.068026	3.48499	0.000492162	0.00436165	71096
Ergic3	Endoplasmic reticulum-Golgi intermediate compartment protein 3	3544.25	0.237214	0.0709055	3.3455	0.000821339	0.00670631	66366
Zfp330	Zinc finger protein 330	2436.67	0.237344	0.0691346	3.43307	0.000596785	0.00513273	30932
Slc6a15	Sodium-dependent neutral amino acid transporter B(0)AT2	3941.25	0.238164	0.0598023	3.98253	6.81859e-05	0.000798584	103098
Rae1	mRNA export factor	1622.14	0.238318	0.0697134	3.41854	0.000629591	0.00536338	66679
Dact3	Dapper homolog 3	3436.71	0.238428	0.0559373	4.26242	2.02222e-05	0.000274453	629378
Coq2	4-hydroxybenzoate polyprenyltransferase, mitochondrial	3951.7	0.238433	0.0707583	3.36969	0.000752541	0.00624363	71883
Cmas	N-acylneuraminate cytidylyltransferase	4080.35	0.238438	0.0566228	4.21099	2.54259e-05	0.000335109	12764
Lpin2	Phosphatidate phosphatase LPIN2	3679.83	0.238602	0.0697494	3.42085	0.000624253	0.00532962	64898
Lrpap1	Alpha-2-macroglobulin receptor-associated protein	11703.3	0.239667	0.0532763	4.49855	6.84173e-06	0.00010573	16976
Nsfl1c	NSFL1 cofactor p47	3475.27	0.24001	0.0613198	3.91407	9.07529e-05	0.00103287	386649
Borcs8	BLOC-1-related complex subunit 8	1279.78	0.240145	0.0686167	3.4998	0.000465609	0.00416448	72368
Uqcrfs1	Cytochrome b-c1 complex subunit Rieske, mitochondrial	5021.72	0.240468	0.0563901	4.26436	2.00475e-05	0.000272541	66694
Nim1k	Serine/threonine-protein kinase NIM1	1754.06	0.240589	0.0676303	3.55741	0.000374526	0.00345326	245269
Atp9a	Probable phospholipid-transporting ATPase IIA	28074.9	0.241355	0.0515295	4.68382	2.81576e-06	4.82289e-05	11981
Akr1a1	Aldo-keto reductase family 1 member A1	11988.6	0.241359	0.0703849	3.42913	0.000605513	0.00519349	58810
Nsg1	Neuronal vesicle trafficking-associated protein 1	26724.1	0.242404	0.0576799	4.20258	2.63892e-05	0.000346108	18196
Ccdc148	Coiled-coil domain-containing protein 148	1639.56	0.242517	0.0698666	3.47115	0.000518235	0.00456096	227933
Agpat5	1-acyl-sn-glycerol-3-phosphate acyltransferase epsilon	3437.96	0.242599	0.0602169	4.02875	5.6075e-05	0.000673708	52123
Dele1	DAP3-binding cell death enhancer 1	2443.64	0.242963	0.0685249	3.54562	0.000391686	0.00358823	66839
Chp1	Calcineurin B homologous protein 1	5331.19	0.243155	0.0695737	3.49492	0.000474198	0.00423035	56398
Kifap3	Kinesin-associated protein 3	16657.5	0.243959	0.0717322	3.40097	0.000671477	0.0056608	16579
Ccz1	Vacuolar fusion protein CCZ1 homolog	2104.73	0.244453	0.067389	3.62749	0.00028619	0.00275209	231874
Repin1	Replication initiator 1	3349.61	0.244965	0.0700102	3.49899	0.000467025	0.0041756	58887
Gpi1	Glucose-6-phosphate isomerase	19281.8	0.245375	0.0629398	3.89857	9.67631e-05	0.00109203	14751
Rps6ka2	Ribosomal protein S6 kinase alpha-2	3926.76	0.24548	0.0650841	3.77174	0.000162116	0.00169145	20112
Cacul1	CDK2-associated and cullin domain-containing protein 1	4927.52	0.24569	0.0631246	3.89214	9.93637e-05	0.00111825	78832
Psmd5	26S proteasome non-ATPase regulatory subunit 5	3736.07	0.245821	0.0644701	3.81295	0.000137319	0.00147561	66998
Dennd6b	Protein DENND6B	3907.34	0.245898	0.0688097	3.5736	0.000352112	0.00328581	69440
Grb2	Growth factor receptor-bound protein 2	4434.66	0.246012	0.0676581	3.63611	0.000276787	0.00268193	14784
Kdsr	3-ketodihydrosphingosine reductase	3308.64	0.246209	0.0656705	3.74916	0.000177429	0.00182756	70750
Ap2s1	AP-2 complex subunit sigma	4852.56	0.24657	0.0711703	3.4645	0.000531216	0.00465825	232910
Csnk1g2	Casein kinase I isoform gamma-2	6424.68	0.247112	0.0590034	4.1881	2.81298e-05	0.000364828	103236
Ankrd16	Ankyrin repeat domain-containing protein 16	2233.32	0.247196	0.0648209	3.81353	0.000136997	0.00147322	320816
Sfr1	Swi5-dependent recombination DNA repair protein 1 homolog	3965.66	0.247558	0.0617725	4.00757	6.13463e-05	0.00072943	67788
Smim7	Small integral membrane protein 7	6761.19	0.247678	0.0653192	3.7918	0.000149557	0.00158434	66818
Psap	Prosaposin	72378.8	0.247904	0.0665864	3.72305	0.000196833	0.00199014	19156
Tcta	T-cell leukemia translocation-altered gene protein homolog	1584.28	0.248348	0.070958	3.49993	0.00046538	0.00416397	102791
Snap47	Synaptosomal-associated protein 47	12394.5	0.248415	0.0764201	3.25065	0.0011514	0.00891944	67826
Tsen34	tRNA-splicing endonuclease subunit Sen34	3081.17	0.249525	0.0569105	4.38451	1.16245e-05	0.00016865	66078
Wdfy2	WD repeat and FYVE domain-containing protein 2	2036.98	0.250177	0.0753936	3.31828	0.000905734	0.00729443	268752
Ppm1g	Protein phosphatase 1G	1598.33	0.250212	0.0671065	3.72858	0.000192559	0.00195428	14208
Daam1	Disheveled-associated activator of morphogenesis 1	4647.14	0.250612	0.0709627	3.5316	0.00041306	0.00376691	208846
Atp6v0d1	V-type proton ATPase subunit d 1	6548.16	0.250653	0.0713221	3.51438	0.000440787	0.00398521	11972
Sdf4	45 kDa calcium-binding protein	13145	0.25068	0.0622735	4.02546	5.68634e-05	0.00068108	20318
Acvr1b	Activin receptor type-1B	8328.69	0.251328	0.0500785	5.01868	5.20269e-07	1.06004e-05	11479
Tro	Trophinin	19545.5	0.251338	0.072011	3.49028	0.000482521	0.00428868	56191
Fgfr3	Fibroblast growth factor receptor 3	6159.46	0.251434	0.0657041	3.82677	0.000129834	0.0014062	14184
Tmub2	Transmembrane and ubiquitin-like domain-containing protein 2	2717.79	0.251471	0.0592517	4.24412	2.19455e-05	0.000294596	72053
Wdr4	tRNA	1658.92	0.251534	0.0653792	3.84732	0.000119419	0.00131214	57773
Hdac11	Histone deacetylase 11	8213.98	0.251585	0.0504223	4.98955	6.05194e-07	1.20864e-05	232232
Ddx49	Probable ATP-dependent RNA helicase DDX49	1241.67	0.252316	0.078439	3.21671	0.00129669	0.00983704	234374
Glo1	Lactoylglutathione lyase	5233.21	0.252525	0.0749743	3.36815	0.000756738	0.006272	109801
Agrn	Agrin	10783.3	0.253088	0.0733522	3.45031	0.000559941	0.00488182	11603
Ppp1r16a	Protein phosphatase 1 regulatory subunit 16A	3161.44	0.253623	0.0635939	3.98816	6.65868e-05	0.000782128	73062
Tspan5	Tetraspanin-5	5224.17	0.253644	0.0771861	3.28613	0.00101574	0.00802278	56224
Mesd	LRP chaperone MESD	2028.7	0.254059	0.0703742	3.61011	0.000306062	0.00292343	67943
Abcf3	ATP-binding cassette sub-family F member 3	4558.33	0.254771	0.0549644	4.63521	3.56579e-06	5.95571e-05	27406
Elac2	Zinc phosphodiesterase ELAC protein 2	1933.67	0.25566	0.0589695	4.33545	1.45461e-05	0.000205489	68626
Tmem199	Transmembrane protein 199	2541.22	0.255737	0.0633197	4.03882	5.37216e-05	0.000650279	195040
Isoc1	Isochorismatase domain-containing protein 1	2372.32	0.255825	0.068465	3.73658	0.000186541	0.00190599	66307
Lin54	Protein lin-54 homolog	1514.79	0.256101	0.075311	3.40058	0.000672424	0.00566443	231506
Gpd1	Glycerol-3-phosphate dehydrogenase [NAD(+)], cytoplasmic	5256.2	0.256377	0.0664188	3.86001	0.000113384	0.00125043	14555
Cmtm4	CKLF-like MARVEL transmembrane domain-containing protein 4	8922.53	0.257371	0.0697398	3.69044	0.000223864	0.00222622	97487
Wdr61	WD repeat-containing protein 61	2462.15	0.257402	0.0607415	4.23767	2.25856e-05	0.000301619	66317
Zfp606	Zinc finger protein 606	1847.92	0.257438	0.0660255	3.89907	9.65618e-05	0.00109027	67370
Sema4c	Semaphorin-4C	809.297	0.257764	0.079173	3.2557	0.00113113	0.00878214	20353
Dgat1	Diacylglycerol O-acyltransferase 1	1348.12	0.257875	0.0692574	3.72342	0.00019654	0.00198801	13350
Pde7a	High affinity cAMP-specific 3',5'-cyclic phosphodiesterase 7A	2016.1	0.258354	0.0748916	3.4497	0.000561209	0.00489111	18583
Prmt7	Protein arginine N-methyltransferase 7	3025.9	0.258846	0.0674676	3.83659	0.000124755	0.00136155	214572
Chd7	Chromodomain-helicase-DNA-binding protein 7	1661.5	0.259234	0.0714319	3.62911	0.000284401	0.00273924	320790
Psma7	Proteasome subunit alpha type-7	6419.75	0.259271	0.0628549	4.12491	3.70886e-05	0.000466695	26444
H3f3b	Histone H3.3	12693.2	0.259336	0.0676778	3.83192	0.000127146	0.00138265	15081
Ccdc32	Coiled-coil domain-containing protein 32	2041.12	0.25937	0.0657108	3.94715	7.90862e-05	0.000912112	269336
Mrpl3	39S ribosomal protein L3, mitochondrial	4039.24	0.259894	0.069427	3.74341	0.000181537	0.00186432	94062
Anks1	Ankyrin repeat and SAM domain-containing protein 1A	2199.63	0.260604	0.0643486	4.04988	5.12445e-05	0.000622789	224650
Fgd4	FYVE, RhoGEF and PH domain-containing protein 4	3510.6	0.261186	0.0802119	3.2562	0.00112914	0.00877183	224014
Flrt2	Leucine-rich repeat transmembrane protein FLRT2	4593.63	0.261235	0.0771388	3.38656	0.000707742	0.00592275	399558
Napa	Alpha-soluble NSF attachment protein	10382	0.261342	0.0625278	4.17961	2.92003e-05	0.000377048	108124
Meaf6	Chromatin modification-related protein MEAF6	3977.9	0.261662	0.0578954	4.51956	6.19686e-06	9.64421e-05	70088
Lifr	Leukemia inhibitory factor receptor	3678.45	0.263507	0.0617487	4.2674	1.97762e-05	0.000269306	16880
Hdac6	Histone deacetylase 6	2681.79	0.264087	0.0645548	4.09091	4.29692e-05	0.00053021	15185
Gcdh	Glutaryl-CoA dehydrogenase, mitochondrial	2352.82	0.264192	0.0708094	3.73103	0.000190696	0.00193781	270076
Lpcat1	Lysophosphatidylcholine acyltransferase 1	2812.71	0.264408	0.0717792	3.68363	0.000229935	0.00227816	210992
Stat3	Signal transducer and activator of transcription 3	4035.88	0.264569	0.0807917	3.27471	0.0010577	0.00829858	20848
Mtch1	Mitochondrial carrier homolog 1	24377.7	0.265401	0.0581281	4.56579	4.97625e-06	7.97024e-05	56462
Zdhhc1	Palmitoyltransferase ZDHHC1	1414.85	0.266925	0.0706474	3.77827	0.000157923	0.00165628	70796
Ric3	Protein RIC-3	6603.91	0.266961	0.0646357	4.13024	3.62378e-05	0.000457656	320360
Tmsb4x	Thymosin beta-4	45482.8	0.26747	0.0664427	4.02557	5.68375e-05	0.00068108	19241
Poldip2	Polymerase delta-interacting protein 2	4271.14	0.26754	0.0707244	3.78285	0.000155045	0.00163531	67811
Atf4	Cyclic AMP-dependent transcription factor ATF-4	4772.97	0.267617	0.0652963	4.0985	4.1583e-05	0.000515208	11911
Zfyve27	Protrudin	4527.79	0.267883	0.0532626	5.02949	4.91796e-07	1.00968e-05	319740
Tomm5	Mitochondrial import receptor subunit TOM5 homolog	1680.69	0.268037	0.0687928	3.8963	9.7674e-05	0.00110128	68512
Med16	Mediator of RNA polymerase II transcription subunit 16	2564.5	0.268133	0.0630393	4.25343	2.1052e-05	0.000284596	216154
Nup133	Nuclear pore complex protein Nup133	2100.62	0.268217	0.0709872	3.77839	0.000157848	0.00165621	234865
Urod	Uroporphyrinogen decarboxylase	1979.59	0.269182	0.0727143	3.70192	0.000213978	0.002142	22275
Rdh11	Retinol dehydrogenase 11	2002.18	0.269542	0.0790469	3.40989	0.000649882	0.00551487	17252
Kif3a	Kinesin-like protein KIF3A	4916.85	0.270753	0.0720956	3.75548	0.000173013	0.00178664	16568
2310011J03Rik	UPF0449 protein C19orf25 homolog	2088.93	0.27082	0.0659856	4.10423	4.05655e-05	0.000504151	66374
Cadm1	Cell adhesion molecule 1	11323.7	0.270949	0.0811929	3.3371	0.000846562	0.00688231	54725
Pef1	Peflin	2688.06	0.271417	0.0731711	3.70934	0.000207797	0.00208703	67898
Arl5a	ADP-ribosylation factor-like protein 5A	4100.99	0.27174	0.0568407	4.78073	1.74657e-06	3.18318e-05	75423
Mettl2	tRNA N(3)-methylcytidine methyltransferase METTL2	735.201	0.271776	0.0808418	3.36182	0.000774311	0.00638701	52686
Elovl6	Elongation of very long chain fatty acids protein 6	3320.7	0.271995	0.0773484	3.51649	0.000437301	0.00395813	170439
Vps33b	Vacuolar protein sorting-associated protein 33B	1167.19	0.272012	0.0796475	3.41519	0.000637364	0.00542197	233405
Col4a2	Collagen alpha-2(IV) chain	1469.42	0.272229	0.0789331	3.44885	0.000562973	0.00489903	12827
Hspa14	Heat shock 70 kDa protein 14	2141.06	0.272407	0.0610496	4.46206	8.11752e-06	0.000123086	50497
Fam174a	Membrane protein FAM174A	3689.89	0.272646	0.0729297	3.73848	0.000185138	0.00189407	67698
Maged1	Melanoma-associated antigen D1	28990.3	0.272698	0.0794693	3.43148	0.000600288	0.00515927	94275
Igsf8	Immunoglobulin superfamily member 8	10378.8	0.272825	0.0642841	4.24406	2.19516e-05	0.000294596	140559
Gm42517	Predicted gene 42517	2584.57	0.27342	0.0551626	4.95663	7.17265e-07	1.40348e-05	NA
Fam241b	Protein FAM241B	1623.88	0.27346	0.0802274	3.40856	0.000653068	0.00553608	69894
Fbxo2	F-box only protein 2	4633.37	0.2738	0.0609135	4.49489	6.96046e-06	0.00010729	230904
Rrp36	Ribosomal RNA processing protein 36 homolog	944.797	0.273928	0.0717429	3.8182	0.000134431	0.0014495	224823
Snx7	Sorting nexin-7	1296.65	0.274222	0.07447	3.68231	0.000231126	0.00228808	76561
Ap1b1	AP-1 complex subunit beta-1	8036.63	0.274629	0.0620973	4.42256	9.75401e-06	0.000144636	11764
Leprot	Leptin receptor gene-related protein	2087.51	0.275071	0.0773048	3.55826	0.000373318	0.00344374	230514
Gle1	Nucleoporin GLE1	3061.82	0.275431	0.0706034	3.90111	9.57546e-05	0.00108419	74412
Derl1	Derlin-1	5665.17	0.276329	0.0634443	4.35545	1.32795e-05	0.000189366	67819
Calm1	Calmodulin-1	199893	0.276586	0.0555449	4.9795	6.37497e-07	1.2648e-05	12313
Fbxw8	F-box/WD repeat-containing protein 8	2427.92	0.276694	0.077863	3.55359	0.000380004	0.00349312	231672
Lemd2	LEM domain-containing protein 2	2353.15	0.276895	0.0701618	3.94652	7.92939e-05	0.000912767	224640
Pithd1	PITH domain-containing protein 1	3289.29	0.277231	0.0598679	4.63071	3.64413e-06	6.06143e-05	66193
0610010F05Rik	Uncharacterized protein KIAA1841	3262.96	0.277862	0.0613305	4.53058	5.88233e-06	9.20209e-05	71675
Acad9	Complex I assembly factor ACAD9, mitochondrial	2063.82	0.277906	0.079461	3.49739	0.000469831	0.00419758	229211
Atp6v0e2	V-type proton ATPase subunit e 2	8922.23	0.27804	0.0854776	3.25278	0.0011428	0.00885854	76252
Fam199x	Protein FAM199X	1862.71	0.278344	0.085951	3.23841	0.00120199	0.00925508	245622
Pi4ka	Phosphatidylinositol 4-kinase alpha	16782	0.279166	0.0608953	4.58437	4.55357e-06	7.35658e-05	224020
Csnk2b	Casein kinase II subunit beta	2272.31	0.279176	0.075693	3.68826	0.000225791	0.00224261	13001
Nrbp1	Nuclear receptor-binding protein	3693.64	0.27941	0.0685876	4.07376	4.62604e-05	0.000567229	192292
Yaf2	YY1-associated factor 2	3600.76	0.279721	0.0639325	4.37526	1.21287e-05	0.000174707	67057
Tusc2	Tumor suppressor candidate 2	2384.36	0.280136	0.0723396	3.87251	0.000107719	0.00119724	80385
Arhgef28	Rho guanine nucleotide exchange factor 28	1780	0.281061	0.0868539	3.23602	0.00121207	0.00932377	110596
Ccdc50	Coiled-coil domain-containing protein 50	3975.93	0.281202	0.0640735	4.38875	1.14005e-05	0.000165698	67501
2510039O18Rik	Uncharacterized protein KIAA2013	1528.25	0.281715	0.0789819	3.56683	0.000361331	0.00335814	77034
Copb2	Coatomer subunit beta'	7018	0.28176	0.0646262	4.35984	1.30156e-05	0.000186262	50797
5730455P16Rik	Protein Njmu-R1	5642.77	0.281945	0.0628426	4.48653	7.23937e-06	0.000111024	70591
Hspa2	Heat shock-related 70 kDa protein 2	2991.17	0.282196	0.0778643	3.62419	0.000289864	0.00278377	15512
Sh3gl3	Endophilin-A3	3793.63	0.282252	0.0695842	4.05626	4.98641e-05	0.000607844	20408
Zfr	Zinc finger RNA-binding protein	18399.6	0.282374	0.0594585	4.74909	2.04331e-06	3.63199e-05	22763
Rab6a	Ras-related protein Rab-6A	13203.2	0.282399	0.0828208	3.40976	0.000650198	0.00551562	19346
Pex2	Peroxisome biogenesis factor 2	2175.28	0.282495	0.0849975	3.32357	0.000888721	0.00717469	19302
1500009C09Rik	RIKEN cDNA 1500009C09 gene	5931.21	0.282697	0.0593535	4.76293	1.90798e-06	3.43593e-05	76505
Rev3l	DNA polymerase zeta catalytic subunit	4588.25	0.283348	0.0825158	3.43387	0.00059503	0.00512128	19714
Hdac9	Histone deacetylase 9	1601.69	0.28413	0.0666089	4.26565	1.99322e-05	0.000271278	79221
Akap7	A-kinase anchor protein 7 isoform alpha	2116.29	0.284267	0.065412	4.34579	1.38774e-05	0.000197078	432442
Commd9	COMM domain-containing protein 9	1473.01	0.284279	0.0695835	4.08544	4.3993e-05	0.000541736	76501
Gls2	Glutaminase liver isoform, mitochondrial	927.422	0.284358	0.0813252	3.49656	0.000471302	0.00420917	216456
Flii	Protein flightless-1 homolog	3086.25	0.284635	0.0752293	3.78356	0.000154599	0.00163132	14248
Ppfia3	Liprin-alpha-3	5724.13	0.284868	0.0663717	4.292	1.77067e-05	0.000244831	76787
Ddx21	Nucleolar RNA helicase 2	1868.76	0.284953	0.0794146	3.58817	0.000333011	0.00314114	56200
Epdr1	Mammalian ependymin-related protein 1	8210.02	0.285188	0.0619435	4.604	4.14462e-06	6.80501e-05	105298
Mrps12	28S ribosomal protein S12, mitochondrial	1821.5	0.285498	0.0628286	4.54408	5.51751e-06	8.71594e-05	24030
Ogfod1	Prolyl 3-hydroxylase OGFOD1	6232.44	0.285656	0.0698418	4.09005	4.31277e-05	0.000531503	270086
Cables2	CDK5 and ABL1 enzyme substrate 2	813.68	0.285822	0.0784949	3.64128	0.000271288	0.0026371	252966
Plbd2	Putative phospholipase B-like 2	1240.09	0.28731	0.076224	3.76928	0.00016372	0.00170451	71772
Stard7	StAR-related lipid transfer protein 7, mitochondrial	6891.75	0.287481	0.0560738	5.12684	2.9465e-07	6.33996e-06	99138
Gfod2	Glucose-fructose oxidoreductase domain-containing protein 2	995.959	0.288016	0.0753509	3.82233	0.000132198	0.0014286	70575
Tsen15	tRNA-splicing endonuclease subunit Sen15	1344.63	0.288408	0.073987	3.89809	9.69538e-05	0.00109367	66637
Unc45a	Protein unc-45 homolog A	1836.62	0.288653	0.0695119	4.15257	3.28764e-05	0.00041857	101869
Wdr12	Ribosome biogenesis protein WDR12	2948.35	0.288883	0.0651958	4.43101	9.37939e-06	0.000139831	57750
Amotl1	Angiomotin-like protein 1	5088.3	0.289292	0.0894182	3.23527	0.00121526	0.00933349	75723
Gpsm1	G-protein-signaling modulator 1	3837.96	0.289613	0.0836293	3.46306	0.000534066	0.00467816	67839
Arhgef11	Rho guanine nucleotide exchange factor	3357.02	0.289645	0.0801113	3.61553	0.000299737	0.00286594	213498
Enpp5	Ectonucleotide pyrophosphatase/phosphodiesterase family member 5	25835.2	0.289846	0.066267	4.37392	1.22036e-05	0.000175577	83965
Rbbp7	Histone-binding protein RBBP7	8886.14	0.290121	0.0605662	4.79015	1.66658e-06	3.04657e-05	245688
Fis1	Mitochondrial fission 1 protein	9059.88	0.290363	0.0639718	4.53893	5.65407e-06	8.89488e-05	66437
Pigs	GPI transamidase component PIG-S	1142.16	0.290551	0.0766537	3.79043	0.000150384	0.00159144	276846
Oscp1	Protein OSCP1	2964.89	0.290959	0.0606207	4.79967	1.58931e-06	2.92078e-05	230751
Clcn5	H(+)/Cl(-) exchange transporter 5	1004.35	0.29098	0.0895006	3.25115	0.00114938	0.00890668	12728
Mdp1	Magnesium-dependent phosphatase 1	1993.45	0.291121	0.0678379	4.29143	1.77529e-05	0.000245205	67881
Hsdl2	Hydroxysteroid dehydrogenase-like protein 2	1820.45	0.291137	0.0882956	3.29729	0.000976217	0.00777406	72479
Slc9a5	Sodium/hydrogen exchanger	1934.66	0.291409	0.0869022	3.35331	0.000798527	0.00655323	277973
Odf2	Outer dense fiber protein 2	5241.76	0.291981	0.0611375	4.7758	1.78993e-06	3.25485e-05	18286
Lgi1	Leucine-rich glioma-inactivated protein 1	4371.5	0.292056	0.0818756	3.56708	0.000360988	0.00335659	56839
Uqcc1	Ubiquinol-cytochrome-c reductase complex assembly factor 1	3376	0.292395	0.0562427	5.1988	2.00578e-07	4.44686e-06	56046
Fbxo44	F-box only protein 44	5546.03	0.29265	0.0593638	4.92977	8.23249e-07	1.59282e-05	230903
Insig1	Insulin-induced gene 1 protein	5225.1	0.292919	0.0851247	3.44106	0.00057944	0.00500849	231070
Mrpl48	39S ribosomal protein L48, mitochondrial	3492.74	0.292976	0.0593436	4.93695	7.93547e-07	1.54028e-05	52443
Pitpna	Phosphatidylinositol transfer protein alpha isoform	6427.39	0.293031	0.0849473	3.44956	0.000561501	0.00489189	18738
Cds2	Phosphatidate cytidylyltransferase 2	32933	0.293265	0.0678728	4.3208	1.55463e-05	0.000217837	110911
Timm50	Mitochondrial import inner membrane translocase subunit TIM50	1384.41	0.293279	0.0820194	3.57573	0.000349253	0.00326379	66525
Dcaf12l1	DDB1- and CUL4-associated factor 12-like protein 1	3332.1	0.293363	0.0586201	5.00448	5.60137e-07	1.12891e-05	245404
Agap3	Arf-GAP with GTPase, ANK repeat and PH domain-containing protein 3	5743.02	0.293751	0.0611443	4.80422	1.55358e-06	2.86383e-05	213990
Spg7	Paraplegin	2620.16	0.29464	0.0669746	4.39928	1.08613e-05	0.000158623	234847
Mfn1	Mitofusin-1	2878.75	0.294709	0.0820664	3.5911	0.00032928	0.00311201	67414
Brinp1	BMP/retinoic acid-inducible neural-specific protein 1	13160.3	0.295114	0.0806484	3.65927	0.000252935	0.00248063	56710
Tmem106c	Transmembrane protein 106C	1186.38	0.295249	0.0863975	3.41733	0.000632387	0.00538342	380967
Lias	Lipoyl synthase, mitochondrial	1580.51	0.29533	0.0807597	3.6569	0.000255281	0.00249958	79464
Pcbp1	Poly(rC)-binding protein 1	1935.5	0.295604	0.090581	3.26342	0.00110077	0.00859056	23983
Chmp6	Charged multivesicular body protein 6	1592.31	0.295658	0.0823545	3.59007	0.00033059	0.00312195	208092
Zfp467	Zinc finger protein 467	1022.82	0.295953	0.0801141	3.69415	0.000220627	0.00219764	68910
Mob2	MOB kinase activator 2	1808.52	0.296195	0.0669139	4.4265	9.57729e-06	0.000142364	101513
Ache	Acetylcholinesterase	3194.32	0.296515	0.0836991	3.54263	0.000396163	0.0036265	11423
Eif2b2	Translation initiation factor eIF-2B subunit beta	1351.51	0.29653	0.0660729	4.48792	7.19223e-06	0.000110371	217715
Lurap1	Leucine rich adaptor protein 1	1746.69	0.297245	0.0748568	3.97085	7.16153e-05	0.000835384	68075
Tm2d1	TM2 domain-containing protein 1	1212.06	0.29732	0.0850657	3.49518	0.000473745	0.00422943	94043
Pmvk	Phosphomevalonate kinase	1595.44	0.297384	0.0691004	4.30366	1.68002e-05	0.000233647	68603
Gpr180	Integral membrane protein GPR180	1724.25	0.297475	0.0862647	3.4484	0.000563925	0.00489967	58245
Rcc1l	RCC1-like G exchanging factor-like protein	653.939	0.298749	0.0886372	3.37047	0.000750394	0.0062301	94254
LTO1	Protein LTO1 homolog	835.137	0.299139	0.0921261	3.24706	0.00116603	0.00902122	72284
Dync2h1	Cytoplasmic dynein 2 heavy chain 1	7760.99	0.29981	0.0790094	3.79461	0.000147878	0.00156863	110350
Cltb	Clathrin light chain B	10558.3	0.299873	0.0563202	5.32442	1.01274e-07	2.40363e-06	74325
Ampd2	AMP deaminase 2	3748.08	0.300015	0.0913278	3.28503	0.00101971	0.00804889	109674
Lzts2	Leucine zipper putative tumor suppressor 2	2432	0.300733	0.089455	3.36184	0.000774258	0.00638701	226154
Edem1	ER degradation-enhancing alpha-mannosidase-like protein 1	1696.92	0.301112	0.0785197	3.83486	0.000125637	0.00136933	192193
Miga2	Mitoguardin 2	4669.32	0.301836	0.0553245	5.45575	4.87678e-08	1.22988e-06	108958
Ptpdc1	Protein tyrosine phosphatase domain-containing protein 1	1633.9	0.301997	0.0736817	4.09867	4.15531e-05	0.000515101	218232
Uck1	Uridine-cytidine kinase 1	2580.65	0.302006	0.0670103	4.50685	6.57973e-06	0.000102007	22245
Ppp1cc	Serine/threonine-protein phosphatase PP1-gamma catalytic subunit	8030.34	0.302479	0.080152	3.77382	0.000160766	0.00167881	19047
Nceh1	Neutral cholesterol ester hydrolase 1	9038.2	0.302494	0.0669606	4.51749	6.25762e-06	9.73251e-05	320024
Tceal1	Transcription elongation factor A protein-like 1	1331.27	0.302858	0.0795213	3.80851	0.000139808	0.00149415	237052
Tspan3	Tetraspanin-3	16283.7	0.303002	0.0658552	4.60104	4.2039e-06	6.88148e-05	56434
Hif1a	Hypoxia-inducible factor 1-alpha	6251.64	0.303415	0.0728893	4.16268	3.1454e-05	0.000402581	15251
B3gat3	Galactosylgalactosylxylosylprotein 3-beta-glucuronosyltransferase 3	4399.8	0.303584	0.0659827	4.60096	4.20543e-06	6.88148e-05	72727
Pex16	Peroxisomal membrane protein PEX16	1212.68	0.303828	0.0763166	3.98115	6.85834e-05	0.000802851	18633
Minpp1	Multiple inositol polyphosphate phosphatase 1	2654.86	0.30412	0.0716442	4.24487	2.18721e-05	0.000293898	17330
Slc7a6	Y+L amino acid transporter 2	940.188	0.304217	0.0928776	3.27546	0.00105491	0.00828342	330836
Anapc11	Anaphase-promoting complex subunit 11	2105.41	0.30444	0.066313	4.59095	4.41223e-06	7.15963e-05	66156
Mgat2	Alpha-1,6-mannosyl-glycoprotein 2-beta-N-acetylglucosaminyltransferase	1938.9	0.304793	0.0812168	3.75283	0.000174848	0.00180405	217664
Ctu2	Cytoplasmic tRNA 2-thiolation protein 2	1052.98	0.305179	0.0816943	3.73562	0.000187254	0.00190925	66965
Atad3a	ATPase family AAA domain-containing protein 3	2150.67	0.305637	0.0639284	4.78092	1.74493e-06	3.18258e-05	108888
Tmem14a	Transmembrane protein 14A	2669.68	0.305811	0.0604305	5.06054	4.18068e-07	8.69387e-06	75712
Ppan	Suppressor of SWI4 1 homolog	925.671	0.30632	0.0748854	4.09052	4.30409e-05	0.000530823	235036
Aip	AH receptor-interacting protein	1491.47	0.307055	0.0677434	4.53263	5.8255e-06	9.13089e-05	11632
Rora	Nuclear receptor ROR-alpha	5559.87	0.307346	0.0669803	4.5886	4.46226e-06	7.22838e-05	19883
Gtpbp3	tRNA modification GTPase GTPBP3, mitochondrial	2196.1	0.307575	0.0737715	4.1693	3.05543e-05	0.000392644	70359
Lrfn5	Leucine-rich repeat and fibronectin type-III domain-containing protein 5	4736.25	0.308232	0.0788435	3.90941	9.2521e-05	0.00105053	238205
Sqstm1	Sequestosome-1	29908.7	0.308322	0.0608183	5.06957	3.98721e-07	8.33455e-06	18412
Pgk1	Phosphoglycerate kinase 1	12583.8	0.308374	0.0712482	4.32817	1.50355e-05	0.000211784	18655
Gosr2	Golgi SNAP receptor complex member 2	4875.73	0.308482	0.0573675	5.3773	7.56098e-08	1.83781e-06	56494
Dhdds	Dehydrodolichyl diphosphate synthase complex subunit Dhdds	1884.9	0.309534	0.0696553	4.44379	8.83872e-06	0.000132773	67422
Tsc22d2	TSC22 domain family, member 2	2513.31	0.31014	0.0775897	3.99718	6.41026e-05	0.000756254	72033
Scarb1	Scavenger receptor class B member 1	1709.27	0.310436	0.0900243	3.44835	0.000564014	0.00489967	20778
Stx3	Syntaxin-3	1708.4	0.310609	0.0654603	4.745	2.08505e-06	3.69158e-05	20908
Ap4s1	AP-4 complex subunit sigma-1	2440.98	0.310883	0.0653433	4.75769	1.95824e-06	3.51327e-05	11782
Wdr91	WD repeat-containing protein 91	1605.33	0.310933	0.0714894	4.34935	1.36539e-05	0.000194361	101240
Klhdc3	Kelch domain-containing protein 3	2040.03	0.311893	0.0950611	3.28097	0.0010345	0.00814965	71765
Alkbh6	Alpha-ketoglutarate-dependent dioxygenase alkB homolog 6	1201.45	0.313063	0.0838308	3.73447	0.000188115	0.0019156	233065
Dedd2	DNA-binding death effector domain-containing protein 2	1512.93	0.313265	0.0728969	4.29737	1.72835e-05	0.000239542	67379
Homez	Homeobox and leucine zipper protein Homez	753.724	0.313311	0.0838678	3.73577	0.00018714	0.00190889	239099
Arl2	ADP-ribosylation factor-like protein 2	2097.89	0.31371	0.0729332	4.30133	1.69779e-05	0.000235848	56327
Adam19	Disintegrin and metalloproteinase domain-containing protein 19	524.059	0.313776	0.0952725	3.29346	0.000989638	0.00786023	11492
Tfcp2	Alpha-globin transcription factor CP2	1545.14	0.313907	0.0730459	4.2974	1.72814e-05	0.000239542	21422
Mvd	Diphosphomevalonate decarboxylase	871.616	0.314425	0.0925104	3.3988	0.000676819	0.00569748	192156
Slc39a10	Zinc transporter ZIP10	9062.18	0.314561	0.0828511	3.7967	0.000146635	0.00155816	227059
Gpr137	Integral membrane protein GPR137	2499.39	0.314838	0.0808793	3.89269	9.91368e-05	0.00111673	107173
Thoc3	THO complex subunit 3	1730.6	0.31526	0.0738375	4.26964	1.95788e-05	0.000267521	73666
Phka1	Phosphorylase b kinase regulatory subunit alpha, skeletal muscle isoform	1651.05	0.315579	0.0808908	3.9013	9.56785e-05	0.00108383	18679
Tub	Tubby protein	7924.14	0.315941	0.0808079	3.90978	9.23788e-05	0.0010494	22141
Lztr1	Leucine-zipper-like transcriptional regulator 1	10293.2	0.316604	0.0626693	5.05199	4.37237e-07	9.04584e-06	66863
Ogdhl	Oxoglutarate dehydrogenase	7262.37	0.317092	0.0671105	4.72492	2.30204e-06	4.03441e-05	239017
Coq4	Ubiquinone biosynthesis protein COQ4 homolog, mitochondrial	728.331	0.317181	0.0904337	3.50733	0.000452628	0.00406794	227683
Ntsr2	Neurotensin receptor type 2	3746.13	0.3176	0.0543015	5.84884	4.95018e-09	1.53291e-07	18217
Bex3	Protein BEX3	4982.65	0.317772	0.0668142	4.75605	1.97414e-06	3.53401e-05	12070
Pgs1	CDP-diacylglycerol--glycerol-3-phosphate 3-phosphatidyltransferase, mitochondrial	2808.36	0.317779	0.0690714	4.60073	4.21007e-06	6.88441e-05	74451
Rheb	GTP-binding protein Rheb	4914.28	0.317885	0.0890692	3.56897	0.00035839	0.003335	19744
Maged2	Mage-d2	2284.25	0.317974	0.0749241	4.24395	2.19622e-05	0.000294596	80884
Coq7	5-demethoxyubiquinone hydroxylase, mitochondrial	1262.11	0.318251	0.0787728	4.04011	5.34251e-05	0.000647662	12850
Zcchc3	Zinc finger CCHC domain-containing protein 3	494.646	0.31917	0.099122	3.21997	0.00128205	0.00975041	67917
Acsl4	Long-chain-fatty-acid--CoA ligase 4	4236.06	0.319231	0.0935353	3.41294	0.000642655	0.00546121	50790
Fam3c	Protein FAM3C	3399.19	0.319232	0.0679786	4.69606	2.65226e-06	4.59162e-05	27999
Washc1	WASH complex subunit 1	2166.71	0.31961	0.073211	4.3656	1.26776e-05	0.000181639	68767
Tbccd1	TBCC domain-containing protein 1	851.226	0.319966	0.0916472	3.49128	0.000480704	0.00427734	70573
Wdr19	WD repeat-containing protein 19	2317.72	0.320216	0.0674763	4.7456	2.07892e-06	3.68612e-05	213081
Slc25a39	Solute carrier family 25 member 39	1683.41	0.320519	0.0835357	3.8369	0.000124595	0.00136042	68066
Pdlim7	PDZ and LIM domain protein 7	1681.36	0.320637	0.0683064	4.69411	2.67773e-06	4.62578e-05	67399
Cacfd1	Calcium channel flower homolog	1059.73	0.320928	0.083828	3.82841	0.000128972	0.00139936	381356
Cdan1	Codanin-1	1170.19	0.321034	0.0752187	4.26801	1.97222e-05	0.000268722	68968
Pknox1	Homeobox protein PKNOX1	1384.94	0.321212	0.0881555	3.6437	0.00026875	0.00261623	18771
Stk3	Serine/threonine-protein kinase 3	1712.74	0.321368	0.0892115	3.60232	0.000315396	0.00299601	56274
Atp1b1	Sodium/potassium-transporting ATPase subunit beta-1	23238.5	0.321462	0.0703958	4.56649	4.9596e-06	7.94884e-05	11931
Ccdc71l	Coiled-coil domain-containing 71-like	1170.71	0.321766	0.0939626	3.4244	0.000616157	0.00527123	72123
Entpd5	Ectonucleoside triphosphate diphosphohydrolase 5	2405.05	0.321774	0.0869283	3.7016	0.000214246	0.00214379	12499
Diras1	GTP-binding protein Di-Ras1	3978.17	0.322096	0.0758563	4.24614	2.17486e-05	0.000292868	208666
Ccdc9	Coiled-coil domain-containing protein 9	1278.14	0.322224	0.0766902	4.20163	2.64998e-05	0.000346994	243846
Elp2	Elongator complex protein 2	5757.07	0.322278	0.0761002	4.23492	2.28635e-05	0.000305163	58523
Pgm1	Phosphoglucomutase-2	3193.47	0.322626	0.0613294	5.26054	1.43629e-07	3.28947e-06	66681
Eml4	Echinoderm microtubule-associated protein-like 4	2988.14	0.323299	0.0575805	5.61474	1.9686e-08	5.36761e-07	78798
Cmpk2	UMP-CMP kinase 2, mitochondrial	2231.13	0.324346	0.0838717	3.86717	0.000110104	0.00121982	22169
Wsb2	WD repeat and SOCS box-containing protein 2	8222.36	0.32435	0.0679713	4.77188	1.82519e-06	3.30158e-05	59043
Cask	Peripheral plasma membrane protein CASK	6362.49	0.324377	0.0802933	4.0399	5.34749e-05	0.000647941	12361
Armc6	Armadillo repeat-containing protein 6	1253.68	0.324474	0.0831256	3.90342	9.48423e-05	0.00107537	76813
Alg5	Dolichyl-phosphate beta-glucosyltransferase	707.378	0.325366	0.082908	3.92443	8.6937e-05	0.000993654	66248
Cdv3	Protein CDV3	4973.48	0.325377	0.0847156	3.84081	0.000122629	0.00134198	321022
B3galt5	Beta-1,3-galactosyltransferase 5	7617.54	0.32599	0.067072	4.8603	1.1721e-06	2.21117e-05	93961
Fam169a	Soluble lamin-associated protein of 75 kDa	4192.58	0.326053	0.0669839	4.86764	1.12938e-06	2.13725e-05	320557
Lrrfip2	Leucine-rich repeat flightless-interacting protein 2	2156.26	0.326075	0.0857496	3.80264	0.000143162	0.00152594	71268
Dgkq	Diacylglycerol kinase theta	2188.83	0.326959	0.0617577	5.29422	1.19527e-07	2.78644e-06	110524
Map3k20	Mitogen-activated protein kinase kinase kinase 20	874.354	0.327167	0.0868097	3.76879	0.000164042	0.00170711	65964
Tmem65	Transmembrane protein 65	3552.12	0.327818	0.0749753	4.37234	1.22919e-05	0.000176532	74868
Ptprf	Receptor-type tyrosine-protein phosphatase F	5473.4	0.328253	0.072795	4.50928	6.50476e-06	0.000101039	19268
Bex2	Protein BEX2	12797.7	0.328355	0.0623798	5.2638	1.41111e-07	3.24193e-06	12069
Mpdu1	Mannose-P-dolichol utilization defect 1 protein	1988.11	0.328811	0.091265	3.60281	0.000314791	0.00299262	24070
Sugp1	SURP and G-patch domain-containing protein 1	1623.65	0.329122	0.0704231	4.6735	2.96105e-06	5.03962e-05	70616
Igfbp4	Insulin-like growth factor-binding protein 4	2680.08	0.329235	0.0838358	3.92714	8.59607e-05	0.00098389	16010
Wdr73	WD repeat-containing protein 73	1990.03	0.32951	0.0722371	4.56151	5.07882e-06	8.11303e-05	71968
Atg16l2	Protein Atg16l2	1768.16	0.329519	0.0819987	4.01859	5.85467e-05	0.000698546	73683
Slc9a9	Sodium/hydrogen exchanger 9	653.709	0.330342	0.0940938	3.51078	0.000446797	0.0040275	331004
Tmem160	Transmembrane protein 160	1095.85	0.331257	0.0936652	3.5366	0.000405307	0.00370179	69094
Ldlr	Low-density lipoprotein receptor	1094.59	0.331703	0.0914266	3.62808	0.000285539	0.00274693	16835
Stmn4	Stathmin-4	8215.39	0.331912	0.0967256	3.43148	0.000600297	0.00515927	56471
Bag1	BAG family molecular chaperone regulator 1	4983.3	0.331966	0.0708292	4.68685	2.77438e-06	4.75537e-05	12017
Snx30	Sorting nexin-30	4575.01	0.332109	0.0660408	5.02885	4.93443e-07	1.01135e-05	209131
Epm2a	Laforin	3329.02	0.332445	0.0544096	6.11004	9.9607e-10	3.52192e-08	13853
Pald1	Paladin	940.929	0.332457	0.093171	3.56824	0.000359385	0.00334297	27355
Cyp2j6	Cytochrome P450 2J6	1566.56	0.333389	0.0877947	3.79738	0.000146235	0.00155528	13110
Apbb1	Amyloid-beta A4 precursor protein-binding family B member 1	21366.7	0.333581	0.0718818	4.64068	3.4726e-06	5.80807e-05	11785
Srebf1	Sterol regulatory element-binding protein 1	6549.04	0.334005	0.0953118	3.50434	0.000457739	0.00410472	20787
Efna3	Ephrin-A3	1281.09	0.334507	0.0794243	4.21164	2.53526e-05	0.000334325	13638
Uck2	Uridine-cytidine kinase 2	1780.09	0.334793	0.0811086	4.12771	3.66396e-05	0.000461525	80914
Arrb2	Beta-arrestin-2	1251.28	0.335363	0.0798095	4.20204	2.6452e-05	0.000346555	216869
Ttll5	Tubulin polyglutamylase TTLL5	2195.91	0.335563	0.0856578	3.91748	8.94805e-05	0.00101925	320244
Sdc3	Syndecan-3	2989.63	0.335594	0.0790133	4.24731	2.16349e-05	0.000291824	20970
Nfxl1	Nuclear transcription factor, X-box-binding-like 1	837.967	0.336673	0.0791958	4.25115	2.1268e-05	0.000287356	100978
Cse1l	Exportin-2	3986.64	0.336695	0.0778348	4.32576	1.52004e-05	0.000213734	110750
Emc6	ER membrane protein complex subunit 6	1636.03	0.33752	0.0734313	4.59641	4.29839e-06	7.00988e-05	66048
Map4k3	Mitogen-activated protein kinase kinase kinase kinase 3	3567.28	0.337753	0.0922706	3.66046	0.000251763	0.00247114	225028
Atmin	ATM interactor	3961.54	0.337883	0.103369	3.26872	0.00108037	0.00845317	234776
1700003E16Rik	Uncharacterized protein C2orf81 homolog	664.893	0.337983	0.0956231	3.53453	0.000408494	0.00372943	71837
Syndig1	Synapse differentiation-inducing gene protein 1	4576.52	0.338726	0.0841776	4.02394	5.7232e-05	0.000684886	433485
Lrrn3	Leucine-rich repeat neuronal protein 3	5406.29	0.339172	0.0971746	3.49033	0.00048242	0.00428868	16981
Ubl3	Ubiquitin-like protein 3	22598.1	0.339385	0.0745682	4.55134	5.33065e-06	8.46499e-05	24109
Smad3	Mothers against decapentaplegic homolog 3	5540.29	0.33999	0.0606401	5.60668	2.06243e-08	5.57942e-07	17127
Rab3a	Ras-related protein Rab-3A	5796.61	0.340335	0.0891888	3.8159	0.00013569	0.00146111	19339
Mocs3	Adenylyltransferase and sulfurtransferase MOCS3	609.946	0.340498	0.0964419	3.53061	0.00041461	0.00377536	69372
Fam185a	Protein FAM185A	1030.26	0.340863	0.0949611	3.5895	0.000331312	0.00312633	330050
AI413582	Small integral membrane protein 29	957.709	0.341107	0.0944936	3.60984	0.000306384	0.00292534	106672
Klhl5	Kelch-like 5	2700.41	0.341391	0.071713	4.76051	1.93102e-06	3.46967e-05	71778
Tmed3	Transmembrane emp24 domain-containing protein 3	1441.63	0.341982	0.105557	3.23978	0.00119621	0.00922231	66111
Plxnb1	Plexin-B1	5779.31	0.342125	0.0897504	3.81196	0.000137869	0.00147846	235611
Rab11fip5	Rab11 family-interacting protein 5	3919.37	0.342429	0.0802137	4.26896	1.96385e-05	0.000268034	52055
Chrnb2	Neuronal acetylcholine receptor subunit beta-2	3643.1	0.342562	0.0844985	4.05406	5.03361e-05	0.00061298	11444
Gprasp2	G-protein coupled receptor-associated sorting protein 2	9036.5	0.342783	0.0708839	4.83583	1.32589e-06	2.46667e-05	245607
Slc35e3	Solute carrier family 35 member E3	719.935	0.342869	0.0856432	4.00346	6.24225e-05	0.000740044	215436
Kcnd3	Potassium voltage-gated channel subfamily D member 3	2837.89	0.343236	0.0798172	4.30028	1.70585e-05	0.000236831	56543
Ypel3	Protein yippee-like 3	2408.9	0.343301	0.0734497	4.67397	2.95439e-06	5.03183e-05	66090
Synj2	Synaptojanin-2	2413.04	0.343809	0.106821	3.21855	0.00128841	0.00978345	20975
Galk2	N-acetylgalactosamine kinase	2071.34	0.344319	0.075028	4.5892	4.44938e-06	7.21235e-05	69976
Kcnh3	Potassium voltage-gated channel subfamily H member 3	8575.52	0.344394	0.0687763	5.00744	5.51574e-07	1.11724e-05	16512
Cacnb3	Voltage-dependent L-type calcium channel subunit beta-3	5302.62	0.344566	0.0836064	4.12129	3.76751e-05	0.000473137	12297
Sub1	Activated RNA polymerase II transcriptional coactivator p15	21684.5	0.344738	0.0779359	4.42335	9.71806e-06	0.00014428	20024
Trir	Telomerase RNA component interacting RNase	3192.23	0.34524	0.0744899	4.63472	3.57413e-06	5.96552e-05	68544
Smim10l2a	Protein Smim10l2a	1151.23	0.3467	0.0827082	4.19184	2.76701e-05	0.000360173	320237
Nt5m	5'(3')-deoxyribonucleotidase, mitochondrial	1175.9	0.346784	0.0758953	4.56924	4.89489e-06	7.85033e-05	103850
Fbxo9	F-box only protein 9	4428.01	0.346826	0.0651827	5.32082	1.03301e-07	2.44454e-06	71538
Sec61b	Protein transport protein Sec61 subunit beta	1506.35	0.34685	0.0789622	4.39261	1.11997e-05	0.000162975	66212
Gusb	Beta-glucuronidase	614.28	0.347821	0.0885129	3.92961	8.50822e-05	0.000974757	110006
Fkbp4	Peptidyl-prolyl cis-trans isomerase FKBP4	6318.06	0.34807	0.0608572	5.71946	1.06864e-08	3.07679e-07	14228
Aprt	Adenine phosphoribosyltransferase	1097.05	0.34831	0.0757281	4.59949	4.23533e-06	6.92105e-05	11821
Ano4	Anoctamin-4	2009.3	0.348848	0.0864685	4.03439	5.47446e-05	0.000661008	320091
Crebzf	CREB/ATF bZIP transcription factor	5968.45	0.34913	0.0532301	6.55888	5.42149e-11	2.35402e-09	233490
Pcdhb16	Uncharacterized protein	1221.56	0.349851	0.0990817	3.53093	0.0004141	0.00377356	93887
Smpd1	Sphingomyelin phosphodiesterase	5556.63	0.350274	0.0788028	4.44495	8.79141e-06	0.000132227	20597
Me3	NADP-dependent malic enzyme, mitochondrial	4404.91	0.350535	0.0658438	5.32373	1.0166e-07	2.40808e-06	109264
Hs6st2	Heparan-sulfate 6-O-sulfotransferase 2	7146.12	0.35125	0.0820383	4.28153	1.85613e-05	0.00025535	50786
Osbpl5	Oxysterol-binding protein-related protein 5	1004.36	0.351272	0.0842394	4.16992	3.04703e-05	0.000391981	79196
Tmem121	Transmembrane protein 121	862.405	0.351835	0.095945	3.66705	0.000245369	0.00241415	69195
Caskin1	Caskin-1	3637.33	0.352004	0.0849202	4.14511	3.39645e-05	0.000430971	268932
Iscu	Iron-sulfur cluster assembly enzyme ISCU, mitochondrial	2508.06	0.352133	0.0832933	4.22763	2.3617e-05	0.000314049	66383
Endod1	Endonuclease domain-containing 1 protein	5726.62	0.352177	0.0961654	3.6622	0.000250057	0.00245539	71946
Slc36a4	Proton-coupled amino acid transporter 4	4741.49	0.352757	0.0663691	5.31508	1.06612e-07	2.51797e-06	234967
Hspa12a	Heat shock 70 kDa protein 12A	7307.12	0.352812	0.103875	3.39652	0.00068249	0.00573922	73442
Akr7a5	Aflatoxin B1 aldehyde reductase member 2	985.173	0.353248	0.0911145	3.87697	0.000105764	0.00117935	110198
Ak4	Adenylate kinase 4, mitochondrial	1442.32	0.353892	0.104909	3.37331	0.000742694	0.00617631	11639
Jag2	Protein jagged-2	1873.81	0.353985	0.0875763	4.04202	5.29934e-05	0.000643396	16450
Nol12	Nucleolar protein 12	733.665	0.354217	0.094863	3.73399	0.000188472	0.00191843	97961
Magi3	Membrane-associated guanylate kinase, WW and PDZ domain-containing protein 3	3917.46	0.354286	0.0788534	4.49296	7.02386e-06	0.000108061	99470
Ddx25	ATP-dependent RNA helicase DDX25	1988.59	0.354417	0.0854915	4.14564	3.38865e-05	0.000430207	30959
Paox	Peroxisomal N(1)-acetyl-spermine/spermidine oxidase	405.681	0.355171	0.105973	3.35153	0.000803673	0.00658219	212503
Katnb1	Katanin p80 WD40 repeat-containing subunit B1	2333.22	0.355329	0.0690624	5.14504	2.67471e-07	5.7964e-06	74187
Tmem161a	Transmembrane protein 161A	2016.18	0.355394	0.0739957	4.8029	1.56381e-06	2.88049e-05	234371
Pus1	tRNA pseudouridine synthase A	540.604	0.355471	0.103879	3.42197	0.000621694	0.00531224	56361
Wdr35	WD repeat-containing protein 35	3475.47	0.356005	0.0806332	4.41512	1.00954e-05	0.000148605	74682
Dipk1b	Divergent protein kinase domain 1B	2065.88	0.356134	0.061446	5.79589	6.79585e-09	2.05704e-07	56279
Mturn	Maturin	4847.81	0.356277	0.0839224	4.24532	2.18284e-05	0.000293615	68235
Gm2a	Ganglioside GM2 activator	2239.14	0.356317	0.0989183	3.60214	0.000315611	0.00299688	14667
Gde1	Glycerophosphodiester phosphodiesterase 1	8102.75	0.356449	0.0873945	4.07861	4.53048e-05	0.000556474	56209
Mindy4	Probable ubiquitin carboxyl-terminal hydrolase MINDY-4	716.111	0.357498	0.0916815	3.89935	9.6451e-05	0.00108952	330323
Orai2	Protein orai-2	6366	0.35799	0.0805104	4.44651	8.72784e-06	0.000131516	269717
Slc46a1	Proton-coupled folate transporter	679.973	0.358118	0.111053	3.22474	0.00126086	0.00961646	52466
Itm2c	Integral membrane protein 2C	90581.1	0.358211	0.0655444	5.46516	4.62489e-08	1.17123e-06	64294
Pcdh11x	Protocadherin 11 X-linked	3408.56	0.358445	0.0961539	3.72783	0.000193139	0.00195852	245578
Gpkow	G-patch domain and KOW motifs-containing protein	1231.43	0.358691	0.0936858	3.82865	0.000128846	0.00139862	209416
Cav2	Caveolin-2	972.168	0.359365	0.106928	3.36081	0.000777149	0.00640387	12390
Txn2	Thioredoxin, mitochondrial	1376.33	0.36046	0.103563	3.48057	0.000500346	0.00442288	56551
Ankrd24	Ankyrin repeat domain-containing protein 24	1203.17	0.361428	0.078467	4.60611	4.10268e-06	6.7453e-05	70615
Zswim7	Zinc finger SWIM domain-containing protein 7	653.936	0.362714	0.0977487	3.71067	0.000206709	0.00207696	69747
Idh2	Isocitrate dehydrogenase [NADP], mitochondrial	3612.3	0.362794	0.101507	3.57409	0.000351446	0.00328175	269951
Bag5	BAG family molecular chaperone regulator 5	6949.8	0.363203	0.0713957	5.08719	3.63413e-07	7.66272e-06	70369
Synpr	Synaptoporin	15877.5	0.364027	0.102265	3.55964	0.000371367	0.00343462	72003
Gatad2a	Transcriptional repressor p66 alpha	1027.13	0.364448	0.0897903	4.05887	4.93098e-05	0.000601997	234366
Pop5	Ribonuclease P/MRP protein subunit POP5	2457.19	0.364645	0.0896053	4.06946	4.7123e-05	0.000577048	117109
Kdelr2	ER lumen protein-retaining receptor 2	1496.62	0.364825	0.0920845	3.96185	7.43723e-05	0.000864757	66913
Mpv17	Protein Mpv17	1338.65	0.36494	0.0678141	5.38148	7.38761e-08	1.79748e-06	17527
Lin37	Protein lin-37 homolog	520.352	0.365539	0.113284	3.22675	0.00125203	0.00956725	75660
Enho	Adropin	2291.99	0.365625	0.0637782	5.73276	9.88113e-09	2.8723e-07	69638
Frat1	Proto-oncogene FRAT1	1203.95	0.365896	0.0887097	4.12465	3.71296e-05	0.000466968	14296
Rnf19b	E3 ubiquitin-protein ligase RNF19B	2004.08	0.366021	0.0679098	5.38981	7.05312e-08	1.71955e-06	75234
Gm16286	#N/A	4140.16	0.366197	0.078129	4.68709	2.77122e-06	4.75332e-05	NA
Mtss1	Protein MTSS 1	1752.5	0.366214	0.0755671	4.8462	1.25848e-06	2.35757e-05	211401
Slc19a2	Thiamine transporter 1	893.078	0.366609	0.0813647	4.50575	6.614e-06	0.000102472	116914
Cryz	Quinone oxidoreductase	1178.24	0.367309	0.0831778	4.41595	1.00565e-05	0.000148213	12972
Ralb	Ras-related protein Ral-B	931.282	0.367952	0.0940951	3.91042	9.21341e-05	0.00104712	64143
Hip1r	Huntingtin-interacting protein 1-related protein	6228.49	0.368311	0.0745662	4.93938	7.83697e-07	1.52484e-05	29816
Wwc1	Protein KIBRA	3530.03	0.368618	0.0868099	4.24627	2.17363e-05	0.000292866	211652
Mpi	Mannose-6-phosphate isomerase	2266.65	0.368847	0.0710773	5.18938	2.10996e-07	4.65171e-06	110119
Klhl26	Kelch-like protein 26	2481.61	0.369098	0.0815795	4.52439	6.05692e-06	9.45076e-05	234378
Rcn2	Reticulocalbin-2	5558	0.36943	0.0717259	5.15058	2.59682e-07	5.64277e-06	26611
Metrn	Meteorin	985.59	0.370089	0.0778897	4.75146	2.01957e-06	3.59671e-05	70083
Atp5g1	ATP synthase F(0) complex subunit C1, mitochondrial	7693.44	0.370134	0.101017	3.66409	0.000248223	0.00243936	11951
Arhgef10l	Rho guanine nucleotide exchange factor 10-like protein	3179.76	0.370388	0.0821214	4.51025	6.47503e-06	0.000100642	72754
Cdr2l	Cerebellar degeneration-related protein 2-like	1014.05	0.37136	0.115082	3.22691	0.00125136	0.00956512	237988
Grk3	Beta-adrenergic receptor kinase 2	3581.95	0.371629	0.113974	3.26065	0.00111158	0.00866098	320129
Mrps6	28S ribosomal protein S6, mitochondrial	626.484	0.372236	0.0996283	3.73624	0.00018679	0.00190773	121022
Galntl6	Polypeptide N-acetylgalactosaminyltransferase	2483.24	0.37249	0.0986047	3.77761	0.000158339	0.00165848	270049
Snrpb	Small nuclear ribonucleoprotein-associated protein B	4172.76	0.372548	0.0581909	6.40218	1.53174e-10	6.1742e-09	20638
Cox8a	Cytochrome c oxidase subunit 8A, mitochondrial	20734.3	0.372631	0.0796597	4.67779	2.89987e-06	4.95642e-05	12868
Yipf2	Protein YIPF2	545.632	0.37281	0.103488	3.60244	0.000315249	0.00299579	74766
Slc6a11	Sodium- and chloride-dependent GABA transporter 3	3126.67	0.372815	0.0646772	5.76424	8.20262e-09	2.43711e-07	243616
Nhlrc3	NHL repeat-containing protein 3	995.768	0.372837	0.0754086	4.94422	7.64476e-07	1.49104e-05	212114
Gpr85	Probable G-protein coupled receptor 85	3216.76	0.37312	0.0672225	5.55052	2.84813e-08	7.47906e-07	64450
Oma1	Metalloendopeptidase OMA1, mitochondrial	678.646	0.373272	0.108942	3.42633	0.000611794	0.0052376	67013
Dnajc15	DnaJ homolog subfamily C member 15	5417.43	0.373495	0.0803052	4.65094	3.30418e-06	5.54557e-05	66148
Sparc	SPARC	6968.16	0.373668	0.102941	3.62994	0.000283482	0.00273297	20692
Zcchc2	Zinc finger CCHC domain-containing protein 2	1130.52	0.373944	0.0895149	4.17745	2.94791e-05	0.000380241	227449
Prickle2	Prickle-like protein 2	11135.6	0.374282	0.0972864	3.84721	0.000119468	0.00131214	243548
Wdr83	WD repeat domain-containing protein 83	702.915	0.375133	0.0997641	3.7602	0.00016978	0.00175776	67836
Cpeb1	Cytoplasmic polyadenylation element-binding protein 1	1799.66	0.375997	0.0837688	4.48851	7.1723e-06	0.000110135	12877
Col16a1	Collagen alpha-1(XVI) chain	1117.66	0.376485	0.0860846	4.37343	1.2231e-05	0.000175762	107581
Gart	Trifunctional purine biosynthetic protein adenosine-3	2634.56	0.377377	0.0637638	5.91836	3.25164e-09	1.04576e-07	14450
Hmgcs1	Hydroxymethylglutaryl-CoA synthase, cytoplasmic	7405.86	0.377737	0.100552	3.75665	0.000172205	0.00177982	208715
Ccdc82	Coiled-coil domain-containing protein 82	1581.91	0.37793	0.0863126	4.37862	1.19434e-05	0.000172345	66396
Pgp	Glycerol-3-phosphate phosphatase	2845.83	0.37824	0.0738201	5.12381	2.99421e-07	6.42546e-06	67078
Wwp2	NEDD4-like E3 ubiquitin-protein ligase WWP2	2888.94	0.378313	0.0642639	5.88687	3.9357e-09	1.23457e-07	66894
Pgls	6-phosphogluconolactonase	1254.95	0.378545	0.0832662	4.54621	5.46217e-06	8.6398e-05	66171
2700081O15Rik	Zinc finger translocation-associated protein	1597.31	0.378623	0.0691888	5.47231	4.44205e-08	1.12848e-06	108899
Rasa3	Ras GTPase-activating protein 3	6184.87	0.379132	0.0692434	5.47536	4.36627e-08	1.11391e-06	19414
Fam149a	Protein FAM149A	889.937	0.379277	0.0914025	4.14952	3.33167e-05	0.000423418	212326
Cd163	Scavenger receptor cysteine-rich type 1 protein M130	827.438	0.379382	0.0838455	4.52478	6.04597e-06	9.43976e-05	93671
Ppp5c	Serine/threonine-protein phosphatase 5	3002.08	0.37975	0.0601877	6.30944	2.80054e-10	1.08024e-08	19060
Pcbp4	Poly(rC)-binding protein 4	6167.53	0.379761	0.0655556	5.79297	6.91529e-09	2.09058e-07	59092
Ccdc85a	Coiled-coil domain-containing protein 85A	2184.84	0.379798	0.0618707	6.13857	8.32654e-10	2.98284e-08	216613
Nell1	Protein kinase C-binding protein NELL1	2166.36	0.380137	0.106122	3.58206	0.000340889	0.00320047	338352
L2hgdh	L-2-hydroxyglutarate dehydrogenase, mitochondrial	1825.99	0.380175	0.0828111	4.59088	4.4139e-06	7.15963e-05	217666
Trpv2	Transient receptor potential cation channel subfamily V member 2	828.538	0.380305	0.10613	3.5834	0.000339147	0.00318666	22368
Ier5	Immediate early response gene 5 protein	6174.46	0.380485	0.0920398	4.13392	3.56623e-05	0.000451331	15939
Nme1	Nucleoside diphosphate kinase A	2878.67	0.380863	0.0735727	5.17669	2.25853e-07	4.95666e-06	18102
Mgst3	Microsomal glutathione S-transferase 3	2589.02	0.380932	0.0943239	4.03855	5.3783e-05	0.000650696	66447
Snhg4	Small nucleolar RNA host gene 4	414.66	0.381644	0.110345	3.45863	0.000542929	0.0047472	100503380
Zfp619	Zinc finger protein 619	585.59	0.381836	0.113929	3.35152	0.000803688	0.00658219	70227
Abca1	Phospholipid-transporting ATPase ABCA1	8076.43	0.382442	0.0860042	4.44679	8.71648e-06	0.000131426	11303
Gcsh	Glycine cleavage system H protein, mitochondrial	3024.73	0.383218	0.0607586	6.30722	2.84085e-10	1.0923e-08	68133
Snn	Stannin	17736.7	0.38346	0.0598569	6.40628	1.49109e-10	6.03045e-09	20621
Plekha2	Pleckstrin homology domain-containing family A member 2	1258.11	0.383895	0.0847187	4.5314	5.85928e-06	9.17195e-05	83436
Akr1e1	1,5-anhydro-D-fructose reductase	1335.84	0.383952	0.0997475	3.84924	0.000118486	0.00130313	56043
Dok5	Docking protein 5	957.488	0.3842	0.10404	3.69281	0.000221787	0.00220737	76829
Chpf2	Hexosyltransferase	3362.35	0.384545	0.0563108	6.82897	8.55236e-12	4.15339e-10	100910
Trpm4	Transient receptor potential cation channel subfamily M member 4	599.689	0.385303	0.108422	3.55373	0.000379814	0.0034927	68667
Pcsk1n	ProSAAS	4165.41	0.385379	0.0685714	5.62011	1.90839e-08	5.22108e-07	30052
Usp13	Ubiquitin carboxyl-terminal hydrolase 13	1350.86	0.385675	0.104598	3.68721	0.000226725	0.00225089	72607
Pold1	DNA polymerase delta catalytic subunit	673.232	0.386309	0.0926616	4.16903	3.05899e-05	0.000392685	18971
Syt5	Synaptotagmin-5	7123.26	0.38659	0.107469	3.59723	0.000321623	0.00304918	53420
Mri1	Methylthioribose-1-phosphate isomerase	721.144	0.386664	0.0913179	4.23426	2.29302e-05	0.000305883	67873
Bnip2	BCL2/adenovirus E1B 19 kDa protein-interacting protein 2	2695.33	0.387006	0.07076	5.46928	4.51866e-08	1.14636e-06	12175
Canx	Calnexin	32573.3	0.387147	0.0545434	7.09796	1.2661e-12	6.88106e-11	12330
Slc25a10	Mitochondrial dicarboxylate carrier	663.119	0.387335	0.0996452	3.88714	0.000101432	0.00113782	27376
Lrch1	Leucine-rich repeat and calponin homology domain-containing protein 1	1325.72	0.387731	0.115367	3.36086	0.000777004	0.00640387	380916
Bend5	BEN domain-containing protein 5	290.964	0.388454	0.119285	3.25653	0.00112783	0.00877014	67621
Zfp579	Zinc finger protein 579	309.547	0.388496	0.118866	3.26837	0.0010817	0.0084608	68490
Usp46	Ubiquitin carboxyl-terminal hydrolase 46	5628.36	0.388542	0.0916387	4.23994	2.23584e-05	0.000298916	69727
G6pdx	Glucose-6-phosphate 1-dehydrogenase X	1563.22	0.388605	0.072517	5.35881	8.37697e-08	2.02597e-06	14381
Map1lc3a	Microtubule-associated proteins 1A/1B light chain 3A	4666.35	0.38881	0.0745824	5.21316	1.85655e-07	4.14979e-06	66734
Timm10	Mitochondrial import inner membrane translocase subunit Tim10	1314.96	0.388881	0.0816214	4.76445	1.89371e-06	3.41277e-05	30059
Agl	4-alpha-glucanotransferase	2910.67	0.390635	0.0832031	4.69496	2.66661e-06	4.61317e-05	77559
Cbx8	Chromobox protein homolog 8	898.077	0.39077	0.09028	4.32843	1.50179e-05	0.000211659	30951
Nagpa	N-acetylglucosamine-1-phosphodiester alpha-N-acetylglucosaminidase	767.589	0.391113	0.0951412	4.11087	3.94176e-05	0.000491906	27426
Cep170b	Centrosomal protein of 170 kDa protein B	1803.95	0.391374	0.0838277	4.66879	3.02976e-06	5.14209e-05	217882
Nemp2	Nuclear envelope integral membrane protein 2	376.125	0.391622	0.116996	3.34731	0.000815993	0.00667618	227094
Adgrb2	Adhesion G protein-coupled receptor B2	16812.8	0.392245	0.0872235	4.49702	6.89137e-06	0.000106429	230775
Btbd6	BTB/POZ domain-containing protein 6	2186.74	0.392655	0.0676977	5.80012	6.62684e-09	2.01251e-07	399566
Yif1b	Protein YIF1B	1200.58	0.393059	0.101051	3.8897	0.000100369	0.00112694	77254
Mettl26	Methyltransferase-like 26	896.022	0.393146	0.109435	3.5925	0.000327515	0.00309775	68347
Borcs7	BLOC-1-related complex subunit 7	600.162	0.394256	0.0871684	4.52292	6.09934e-06	9.5108e-05	66439
Snx9	Sorting nexin-9	986.526	0.394609	0.0927378	4.25511	2.0895e-05	0.000282789	66616
Crim1	Cysteine-rich motor neuron 1 protein	6342.02	0.395264	0.0736903	5.36385	8.1467e-08	1.97423e-06	50766
Fam214b	Protein FAM214B	899.522	0.395519	0.103528	3.82039	0.000133238	0.00143856	230088
Grsf1	G-rich sequence factor 1	3988.61	0.395736	0.0759824	5.20826	1.90624e-07	4.25298e-06	231413
Nmnat2	Nicotinamide/nicotinic acid mononucleotide adenylyltransferase 2	11317.1	0.395769	0.0668917	5.91656	3.28746e-09	1.05587e-07	226518
Unc13b	Protein unc-13 homolog B	2099.39	0.396083	0.0903778	4.38253	1.17311e-05	0.000169788	22249
Stx6	Syntaxin-6	8763	0.396122	0.0628546	6.30219	2.93474e-10	1.12305e-08	58244
Enah	Protein enabled homolog	6570.45	0.397354	0.0937023	4.24061	2.22916e-05	0.000298352	13800
Ssh1	Protein phosphatase Slingshot homolog 1	557.178	0.397852	0.10368	3.83732	0.000124383	0.00135871	231637
Raph1	Ras association	1796.02	0.398234	0.112502	3.53981	0.000400418	0.00366267	77300
Pitpnm1	Membrane-associated phosphatidylinositol transfer protein 1	4783.85	0.398378	0.0734473	5.424	5.82796e-08	1.44712e-06	18739
Coq3	Ubiquinone biosynthesis O-methyltransferase, mitochondrial	1051.17	0.398509	0.0788399	5.05466	4.31167e-07	8.9279e-06	230027
Ptges2	Prostaglandin E synthase 2	1704.55	0.398587	0.0875275	4.55385	5.26719e-06	8.38072e-05	96979
Pnkd	Probable hydrolase PNKD	2202.83	0.398619	0.0716169	5.56599	2.60667e-08	6.91254e-07	56695
Dalrd3	DALR anticodon-binding domain-containing protein 3	3126.63	0.399008	0.0682978	5.84217	5.15242e-09	1.5874e-07	67789
Ddrgk1	DDRGK domain-containing protein 1	4011.22	0.400218	0.0701815	5.70262	1.17981e-08	3.37677e-07	77006
Apmap	Adipocyte plasma membrane-associated protein	3293.57	0.400637	0.0765887	5.23102	1.6858e-07	3.79618e-06	71881
Pycrl	Pyrroline-5-carboxylate reductase 3	831.399	0.401519	0.0940202	4.27056	1.94981e-05	0.000266721	66194
Scn1b	Sodium channel subunit beta-1	8205.57	0.401912	0.071395	5.62942	1.8082e-08	4.98646e-07	20266
Ccdc136	Coiled-coil domain-containing protein 136	1082.56	0.402227	0.0767845	5.23838	1.6199e-07	3.66826e-06	232664
Mvb12a	Multivesicular body subunit 12A	990.17	0.402808	0.0848887	4.74514	2.08367e-06	3.69158e-05	73711
Ypel4	Protein yippee-like 4	1316.21	0.404458	0.0770863	5.24682	1.54748e-07	3.52409e-06	241525
Apba2	Amyloid-beta A4 precursor protein-binding family A member 2	4760.34	0.405951	0.121963	3.32848	0.000873208	0.007082	11784
Klhl23	Kelch-like protein 23	5365.92	0.406353	0.0741074	5.48329	4.17477e-08	1.06956e-06	277396
Tafa5	Chemokine-like protein TAFA-5	4948.4	0.407813	0.0654941	6.22672	4.76303e-10	1.76949e-08	106014
Cers4	Ceramide synthase 4	2718.93	0.407995	0.0835627	4.8825	1.04749e-06	1.99007e-05	67260
Pafah1b3	Platelet-activating factor acetylhydrolase IB subunit alpha1	319.929	0.408455	0.125032	3.2668	0.00108772	0.00850241	18476
Susd4	Sushi domain-containing protein 4	3142.94	0.408571	0.110833	3.68637	0.000227472	0.0022556	96935
Asb1	Ankyrin repeat and SOCS box protein 1	4252.93	0.408712	0.0637022	6.41598	1.39919e-10	5.66824e-09	65247
Arl4c	ADP-ribosylation factor-like protein 4C	1738.96	0.408852	0.0824608	4.95815	7.11693e-07	1.39484e-05	320982
Pfkl	ATP-dependent 6-phosphofructokinase, liver type	10369.7	0.409129	0.0786584	5.20134	1.97861e-07	4.40226e-06	18641
Dusp28	Dual specificity phosphatase 28	1129.26	0.409466	0.0747575	5.47726	4.31957e-08	1.10316e-06	67446
Mfsd5	Molybdate-anion transporter	1211.83	0.409655	0.0697606	5.87231	4.29774e-09	1.34464e-07	106073
Clstn1	Calsyntenin-1	52757.1	0.410827	0.0977257	4.20388	2.62381e-05	0.000344687	65945
Rgs4	Regulator of G-protein signaling 4	47596	0.411084	0.0805867	5.10113	3.37624e-07	7.15013e-06	19736
Acox3	Peroxisomal acyl-coenzyme A oxidase 3	1323.51	0.411401	0.076794	5.3572	8.45215e-08	2.04211e-06	80911
Zfp52	Zinc finger protein 52	397.385	0.411504	0.122604	3.35637	0.000789718	0.00648898	22710
Cbfb	Core-binding factor subunit beta	1449.35	0.412517	0.11102	3.71568	0.000202658	0.00204221	12400
Armcx6	Protein ARMCX6	270.944	0.412776	0.124222	3.3229	0.000890884	0.0071868	278097
Trnau1ap	tRNA selenocysteine 1-associated protein 1	1448.75	0.413284	0.0815799	5.066	4.0626e-07	8.47018e-06	71787
Ccdc157	Coiled-coil domain-containing protein 157	1823.99	0.413705	0.0983692	4.20564	2.6035e-05	0.000342576	216516
Pnmal1	Paraneoplastic antigen-like protein 8A	9359.06	0.414311	0.0908888	4.55843	5.15367e-06	8.22173e-05	71691
Atp2b3	Calcium-transporting ATPase	5307.33	0.414604	0.102155	4.0586	4.93684e-05	0.000602106	320707
Mapkapk2	MAP kinase-activated protein kinase 2	1225.57	0.414796	0.12336	3.36247	0.000772473	0.00637837	17164
Npdc1	Neural proliferation differentiation and control protein 1	2458.35	0.414932	0.104858	3.95707	7.58758e-05	0.000879701	18146
Plekha3	Pleckstrin homology domain-containing family A member 3	2157.29	0.415062	0.0581239	7.14099	9.26618e-13	5.15178e-11	83435
Calm3	Calmodulin-3	100533	0.415079	0.0520558	7.97373	1.5396e-15	1.1636e-13	12315
Rab11fip4	Rab11 family-interacting protein 4	28500.9	0.415128	0.0662404	6.267	3.68078e-10	1.38444e-08	268451
Strip1	Striatin-interacting protein 1	1655.75	0.416217	0.109107	3.81478	0.000136307	0.00146645	229707
Sord	Sorbitol dehydrogenase	1073.61	0.416615	0.0759745	5.48362	4.1671e-08	1.06873e-06	20322
Stim2	Stromal interaction molecule 2	5331.88	0.416646	0.0736475	5.6573	1.53775e-08	4.3295e-07	116873
Pcmt1	Protein-L-isoaspartate(D-aspartate) O-methyltransferase	4319.16	0.416718	0.0576066	7.23386	4.6946e-13	2.73588e-11	18537
Prrc1	Protein PRRC1	559.733	0.416972	0.101904	4.09182	4.28009e-05	0.000528402	73137
Pcdh7	Protocadherin 7	6782.7	0.417267	0.0892959	4.67286	2.97041e-06	5.05199e-05	54216
Sqle	Squalene monooxygenase	2372.88	0.417471	0.089465	4.66631	3.0666e-06	5.19777e-05	20775
Tacc3	Transforming acidic coiled-coil-containing protein 3	303.896	0.417591	0.124343	3.35839	0.000783987	0.0064507	21335
Dtd1	D-aminoacyl-tRNA deacylase 1	3300.47	0.41802	0.0727034	5.74966	8.94219e-09	2.62779e-07	66044
Ccdc57	Coiled-coil domain-containing protein 57	581.042	0.418569	0.12971	3.22696	0.00125113	0.00956512	71276
Akap13	A-kinase anchor protein 13	3035.63	0.41935	0.0803095	5.22167	1.77312e-07	3.98171e-06	75547
Ssx2ip	Afadin- and alpha-actinin-binding protein	6334.68	0.419625	0.0477263	8.79233	1.46486e-18	1.53366e-16	99167
Nol4l	Nucleolar protein 4-like	915.99	0.419675	0.123096	3.40933	0.000651222	0.00552238	329540
Slc30a10	Zinc transporter 10	2496.04	0.420006	0.0939807	4.46906	7.85631e-06	0.000119425	226781
Manbal	Protein MANBAL	1181.36	0.420733	0.078879	5.33391	9.61228e-08	2.2949e-06	69161
Pdgfb	Platelet-derived growth factor subunit B	949.202	0.421113	0.0888414	4.74006	2.1366e-06	3.7718e-05	18591
Flot2	Flotillin-2	3324.94	0.421872	0.0635705	6.63629	3.21683e-11	1.4434e-09	14252
Trim26	Tripartite motif-containing protein 26	760.754	0.423544	0.0848561	4.99132	5.99679e-07	1.19961e-05	22670
Zkscan17	Zinc finger protein 496	353.901	0.424339	0.129041	3.28841	0.00100753	0.00797095	268417
Rragd	Ras-related GTP-binding protein D	29194.1	0.425934	0.0510808	8.33845	7.52714e-17	6.52487e-15	52187
Ntmt1	N-terminal Xaa-Pro-Lys N-methyltransferase 1	1355.61	0.427282	0.0700896	6.09623	1.08602e-09	3.80658e-08	66617
Mad2l1	Mitotic spindle assembly checkpoint protein MAD2A	423.694	0.427586	0.1143	3.74093	0.000183341	0.00187966	56150
Stip1	Stress-induced-phosphoprotein 1	8207.64	0.427649	0.0635382	6.73059	1.68976e-11	7.87417e-10	20867
Tgfb3	Transforming growth factor beta-3 proprotein	971.323	0.427739	0.0810828	5.27533	1.32516e-07	3.06396e-06	21809
Tmem30a	Cell cycle control protein 50A	27761.6	0.42775	0.0727901	5.87649	4.19062e-09	1.31283e-07	69981
Clcn2	Chloride channel protein 2	3080.82	0.428467	0.0540143	7.93248	2.14806e-15	1.60342e-13	12724
Slc4a10	Sodium-driven chloride bicarbonate exchanger	14939.9	0.429001	0.103263	4.15443	3.26093e-05	0.000415519	94229
Fndc10	Fibronectin type III domain-containing protein 10	778.459	0.429234	0.0821584	5.22446	1.74661e-07	3.92581e-06	230991
Dph3	DPH3 homolog	1842.96	0.429421	0.0746037	5.75603	8.61175e-09	2.54304e-07	105638
Epb41l4b	Band 4.1-like protein 4B	847.63	0.429994	0.115749	3.71489	0.000203295	0.00204681	54357
Sh3bgrl	SH3 domain-binding glutamic acid-rich-like protein	4700.26	0.430824	0.11113	3.87674	0.000105866	0.00117935	56726
Acd	Adrenocortical dysplasia protein	751.521	0.430939	0.0910678	4.73207	2.22239e-06	3.90899e-05	497652
Cavin1	Caveolae-associated protein 1	961.248	0.433104	0.133866	3.23535	0.00121492	0.00933349	19285
Tubb4b	Tubulin beta-4B chain	9360.61	0.434211	0.0944827	4.59567	4.31364e-06	7.03001e-05	227613
Golm1	Golgi membrane protein 1	1305.93	0.43521	0.0897957	4.84667	1.2555e-06	2.35748e-05	105348
Myt1	Myelin transcription factor 1	1905.94	0.435284	0.0743975	5.85079	4.89253e-09	1.517e-07	17932
Itpkc	Inositol-trisphosphate 3-kinase C	280.64	0.435904	0.126226	3.45336	0.000553642	0.00483213	233011
Cc2d2a	Coiled-coil and C2 domain-containing protein 2A	1970.12	0.436252	0.0859258	5.07708	3.83285e-07	8.03271e-06	231214
Zfp503	Zinc finger protein 503	1217.97	0.436944	0.0980015	4.45854	8.25206e-06	0.000125048	218820
Enc1	Ectoderm-neural cortex protein 1	23184.4	0.437146	0.113057	3.86659	0.000110369	0.0012222	13803
Itgb8	Integrin beta-8	7743.88	0.438461	0.106742	4.10768	3.99648e-05	0.000497965	320910
Clta	Clathrin light chain A	12902.7	0.438464	0.0642	6.82967	8.51117e-12	4.1417e-10	12757
BC030500	cDNA sequence BC030500	893.356	0.438675	0.106515	4.11845	3.81427e-05	0.000477475	234290
Zfp868	Zinc finger protein 868	959.447	0.438978	0.0930005	4.72016	2.35657e-06	4.12698e-05	234362
Dpysl4	Dihydropyrimidinase-related protein 4	1005.89	0.439845	0.10469	4.20141	2.65253e-05	0.000347139	26757
Cox5a	Cytochrome c oxidase subunit 5A, mitochondrial	2014.77	0.440044	0.130615	3.36901	0.000754375	0.00625456	12858
Cmc2	COX assembly mitochondrial protein 2 homolog	464.812	0.440165	0.0990239	4.44504	8.78754e-06	0.000132227	66531
Hes6	Transcription cofactor HES-6	642.204	0.440469	0.133388	3.30216	0.000959417	0.0076554	55927
Dusp18	Dual specificity protein phosphatase 18	973.163	0.440659	0.109055	4.0407	5.32913e-05	0.000646364	75219
Kcnv1	Potassium voltage-gated channel subfamily V member 1	6902.72	0.440673	0.108346	4.06727	4.75675e-05	0.000581902	67498
Emc4	ER membrane protein complex subunit 4	2421.14	0.441316	0.0796952	5.53756	3.0672e-08	8.02815e-07	68032
Slc46a3	Solute carrier family 46 member 3	494.897	0.441365	0.0898291	4.91339	8.95151e-07	1.71683e-05	71706
Selenoh	Selenoprotein H	737.361	0.442812	0.0914569	4.84175	1.28699e-06	2.40355e-05	72657
Gpc1	Glypican-1	5370.84	0.443433	0.081262	5.45683	4.84707e-08	1.22366e-06	14733
Gstz1	Maleylacetoacetate isomerase	1464.44	0.444509	0.10272	4.32739	1.50886e-05	0.000212408	14874
2210408I21Rik	Uncharacterized protein KIAA0825 homolog	1476.91	0.444948	0.110609	4.02272	5.75287e-05	0.000687756	72371
Snx8	Sorting nexin-8	652.44	0.444965	0.101116	4.40052	1.07993e-05	0.000157908	231834
Lgals8	Galectin-8	1913.41	0.445437	0.0813826	5.47337	4.41563e-08	1.12509e-06	56048
Sirt3	NAD-dependent protein deacetylase sirtuin-3	2023.47	0.445492	0.0797225	5.58803	2.29661e-08	6.15781e-07	64384
Spaca6	Sperm acrosome membrane-associated protein 6	1277.79	0.445621	0.112121	3.97448	7.05328e-05	0.000824075	75202
Ckb	Creatine kinase B-type	190494	0.447243	0.067125	6.66283	2.68599e-11	1.21877e-09	12709
Eif2ak4	eIF-2-alpha kinase GCN2	1494.99	0.447539	0.0779438	5.74181	9.36716e-09	2.74267e-07	27103
Kcnc3	Potassium voltage-gated channel subfamily C member 3	382.718	0.447761	0.124954	3.5834	0.000339155	0.00318666	16504
Col11a2	Collagen alpha-2(XI) chain	3406.19	0.449072	0.107213	4.18858	2.80706e-05	0.000364673	12815
Hyls1	Hydrolethalus syndrome protein 1 homolog	679.802	0.449977	0.0884142	5.08941	3.59171e-07	7.57989e-06	76832
Kcnn2	Small conductance calcium-activated potassium channel protein 2	956.085	0.450464	0.127733	3.5266	0.000420925	0.00382709	140492
Cgrrf1	Cell growth regulator with RING finger domain protein 1	1261.97	0.451406	0.0951967	4.74183	2.11797e-06	3.74712e-05	68755
Tmem9	Proton-transporting V-type ATPase complex assembly regulator TMEM9	2474.35	0.45173	0.081244	5.56016	2.69527e-08	7.10851e-07	66241
Tram1	Translocating chain-associated membrane protein 1	2082.03	0.452004	0.100928	4.47851	7.51674e-06	0.000114986	72265
Plekho2	Pleckstrin homology domain-containing family O member 2	548.617	0.452363	0.0946754	4.77805	1.77007e-06	3.22278e-05	102595
Lrrc75a	Leucine-rich repeat-containing protein 75A	438.276	0.45319	0.106377	4.26022	2.04229e-05	0.000276866	192976
Asphd2	Aspartate beta-hydroxylase domain-containing protein 2	9132.61	0.453252	0.0666778	6.79765	1.0634e-11	5.12319e-10	72898
Dctn2	Dynactin subunit 2	9714.64	0.453539	0.0687264	6.5992	4.13388e-11	1.82109e-09	69654
Arl2bp	ADP-ribosylation factor-like protein 2-binding protein	4295.01	0.454832	0.0807932	5.62958	1.80645e-08	4.98646e-07	107566
Mpp7	MAGUK p55 subfamily member 7	3193.46	0.454955	0.10291	4.42092	9.82821e-06	0.000145647	75739
Kdm8	Bifunctional peptidase and arginyl-hydroxylase JMJD5	437.2	0.455212	0.125384	3.63055	0.000282823	0.00273057	77035
Nat8l	N-acetylaspartate synthetase	12693.8	0.457136	0.0711724	6.42295	1.33661e-10	5.46046e-09	269642
Zfp941	Zinc finger protein 941	3856.28	0.45733	0.0743392	6.15194	7.65412e-10	2.76704e-08	407812
Grk2	Beta-adrenergic receptor kinase 1	5192.21	0.457609	0.0677353	6.75583	1.42016e-11	6.68223e-10	110355
Zbtb22	Zinc finger and BTB domain-containing protein 22	2170.95	0.457722	0.0688577	6.64736	2.98391e-11	1.34502e-09	81630
Rfx4	Transcription factor RFX4	980.403	0.458005	0.106036	4.31935	1.56489e-05	0.000219148	71137
Abr	Active breakpoint cluster region-related protein	15162.3	0.458281	0.0536288	8.54542	1.28067e-17	1.19127e-15	109934
N4bp2	NEDD4-binding protein 2	895.725	0.45838	0.135678	3.37843	0.000729017	0.00608185	333789
Ankrd54	Ankyrin repeat domain-containing protein 54	861.249	0.459368	0.114081	4.0267	5.65651e-05	0.000678248	223690
Tceal3	Transcription elongation factor A protein-like 3	4056.24	0.459699	0.0693122	6.63229	3.30512e-11	1.47753e-09	594844
Vav2	Guanine nucleotide exchange factor VAV2	645.943	0.459716	0.11009	4.17581	2.96931e-05	0.000382593	22325
Odc1	Ornithine decarboxylase	4907.49	0.460357	0.105366	4.36914	1.24735e-05	0.000178825	18263
Inhbb	Inhibin beta B chain	302.806	0.461048	0.139549	3.30385	0.000953654	0.00761444	16324
Vwc2	Brorin	439.939	0.461165	0.133659	3.45031	0.000559937	0.00488182	319922
Ern1	Serine/threonine-protein kinase/endoribonuclease IRE1	502.717	0.462261	0.0937116	4.9328	8.10575e-07	1.56956e-05	78943
Pnpla3	1-acylglycerol-3-phosphate O-acyltransferase Pnpla3	194.417	0.462847	0.142768	3.24195	0.00118714	0.00916114	116939
Wee1	Wee1-like protein kinase	946.974	0.463048	0.102815	4.50368	6.67864e-06	0.000103342	22390
Wdr31	WD repeat-containing protein 31	389.858	0.463942	0.099432	4.66593	3.07227e-06	5.19963e-05	71354
Ecel1	Endothelin-converting enzyme-like 1	1789.03	0.463966	0.0934876	4.96286	6.9461e-07	1.36467e-05	13599
Nudt12	NAD-capped RNA hydrolase NUDT12	442.042	0.464256	0.122526	3.78903	0.000151234	0.0015986	67993
Bcat1	Branched-chain-amino-acid aminotransferase, cytosolic	3312.95	0.464502	0.12162	3.81929	0.000133836	0.00144436	12035
Gprin2	G protein-regulated inducer of neurite outgrowth 2	321.437	0.464834	0.107465	4.32545	1.52221e-05	0.00021379	432839
Armcx4	Armadillo repeat-containing, X-linked 4	2604.79	0.464975	0.114782	4.05095	5.10104e-05	0.000620567	100503043
Snrnp25	U11/U12 small nuclear ribonucleoprotein 25 kDa protein	669.315	0.465234	0.114892	4.0493	5.13708e-05	0.000624009	78372
Nexmif	Neurite extension and migration factor	4371.15	0.46551	0.103815	4.48404	7.32437e-06	0.000112185	245555
Slc35d3	Solute carrier family 35 member D3	3414.87	0.467208	0.0978924	4.77267	1.81803e-06	3.29109e-05	76157
Slc29a1	Equilibrative nucleoside transporter 1	2249.77	0.468034	0.125036	3.74318	0.000181707	0.00186527	63959
1110065P20Rik	Uncharacterized protein C1orf122 homolog	780.373	0.469124	0.107111	4.37979	1.18794e-05	0.000171525	68920
Rgs3	Regulator of G-protein signaling 3	1030.33	0.469571	0.12754	3.68174	0.000231644	0.00229227	50780
Slc16a3	Monocarboxylate transporter 4	532.08	0.470046	0.111923	4.19974	2.6722e-05	0.000349335	80879
Timp2	Metalloproteinase inhibitor 2	6669.03	0.470449	0.0755805	6.22447	4.83173e-10	1.79226e-08	21858
Tom1	Target of Myb protein 1	509.693	0.471066	0.113005	4.16855	3.06547e-05	0.000393307	21968
Rbm3	RNA-binding protein 3	5697.44	0.471158	0.0851159	5.53549	3.10361e-08	8.11468e-07	19652
Cndp2	Cytosolic non-specific dipeptidase	1346.92	0.472394	0.0922345	5.12166	3.02863e-07	6.49357e-06	66054
[truncated: 772 more rows]

## Sheet: DETF01
	baseMean	log2FoldChange	lfcSE	stat	pvalue	padj	entrez
Ctbp1	9435.22	0.189379	0.0533143	3.55213	0.000382125	0.00350862	13016
Eya1	370.863	-0.928064	0.185847	-4.9937	5.92349e-07	1.18592e-05	14048
Morf4l2	13330.4	0.196812	0.0542076	3.6307	0.000282652	0.00273001	56397
Aff3	3260.84	-0.411321	0.0865359	-4.75318	2.00242e-06	3.57602e-05	16764
Pou3f3	6274.03	-0.321499	0.0785081	-4.09511	4.21966e-05	0.000521796	18993
Mapk9	9758.83	0.19907	0.0594933	3.34608	0.00081962	0.00669568	26420
Src	4727.09	0.218471	0.0647403	3.37457	0.000739313	0.006155	20779
Per2	1589.88	-0.730508	0.0984961	-7.41661	1.20154e-13	7.35677e-12	18627
Cdc73	3682.81	-0.304858	0.0596279	-5.11267	3.1763e-07	6.76817e-06	214498
Tax1bp1	11940	0.220068	0.0619106	3.55461	0.000378541	0.00348497	52440
Zbtb37	2321.12	-0.241379	0.0675722	-3.57216	0.000354047	0.00329966	240869
Rxrg	6551.64	-0.66567	0.117118	-5.68376	1.31761e-08	3.7402e-07	20183
Atf6	6235.88	-0.617838	0.0953941	-6.47669	9.37555e-11	3.90271e-09	226641
Zbtb18	6896.5	-0.638586	0.0876779	-7.28332	3.25715e-13	1.93074e-11	30928
Ahctf1	7444.1	-0.297965	0.0541996	-5.49755	3.85104e-08	9.91879e-07	226747
Creb3	2735.7	0.225924	0.066974	3.37331	0.000742699	0.00617631	12913
Taf3	279.992	-0.484769	0.144524	-3.35424	0.000795828	0.00653552	209361
Dnajc1	2599.19	-0.316083	0.0838499	-3.76963	0.00016349	0.00170285	13418
Sohlh1	17.9808	-7.76513	1.20375	-6.45079	1.11265e-10	4.57645e-09	227631
Rxra	1919.32	-0.486571	0.0994472	-4.89275	9.94343e-07	1.89654e-05	20181
Zbtb34	475.321	-0.393524	0.106051	-3.71071	0.000206676	0.00207696	241311
Rc3h2	11259.5	-0.27171	0.0534653	-5.08198	3.73516e-07	7.86204e-06	319817
Mbd5	2922.99	-0.298763	0.0786296	-3.79962	0.000144915	0.00154396	109241
Sp9	571.569	-0.465079	0.096965	-4.79636	1.61575e-06	2.96037e-05	381373
Zfp804a	589.195	-0.681118	0.125086	-5.44519	5.17511e-08	1.29834e-06	241514
Mga	9191.08	-0.178586	0.0517855	-3.44857	0.000563572	0.00489967	29808
Kcnip3	3338.4	-0.360928	0.0864807	-4.17351	2.99939e-05	0.000386264	56461
Zc3h6	1218.12	-0.335186	0.0764554	-4.38407	1.16481e-05	0.000168789	78751
Camta1	5964.34	0.226031	0.0698537	3.23578	0.0012131	0.00932579	100072
Trib3	114.518	-1.29746	0.318557	-4.07293	4.64255e-05	0.000568795	228775
E2f1	223.188	-0.790776	0.187445	-4.21872	2.45696e-05	0.000325597	13555
Zfp341	153.288	-0.645399	0.173638	-3.71692	0.000201669	0.00203309	228807
Ncoa6	1030.09	-0.320129	0.0956506	-3.34686	0.000817329	0.00668326	56406
Txn1	2040.02	0.231666	0.0692249	3.34657	0.000818175	0.00668725	22166
Hdac11	8213.98	0.251585	0.0504223	4.98955	6.05194e-07	1.20864e-05	232232
Ncoa3	2443.78	-0.293429	0.0805377	-3.64337	0.000269093	0.00261786	17979
Zfp606	1847.92	0.257438	0.0660255	3.89907	9.65618e-05	0.00109027	67370
Zfp831	1423.13	-0.807038	0.135641	-5.94979	2.68481e-09	8.78648e-08	100043757
Zfp512b	2488.83	-0.302999	0.0894275	-3.3882	0.000703521	0.0058915	269401
Prmt7	3025.9	0.258846	0.0674676	3.83659	0.000124755	0.00136155	214572
Hey1	3595.87	-0.34436	0.0668038	-5.1548	2.53902e-07	5.52214e-06	15213
Meaf6	3977.9	0.261662	0.0578954	4.51956	6.19686e-06	9.64421e-05	70088
Skil	13269.8	-0.462604	0.076148	-6.07506	1.23943e-09	4.28836e-08	20482
Zmat3	2438.24	-0.488984	0.104242	-4.69084	2.7208e-06	4.68282e-05	22401
Foxo1	1855.11	-0.543192	0.0906492	-5.99224	2.06969e-09	6.91372e-08	56458
Hdac6	2681.79	0.264087	0.0645548	4.09091	4.29692e-05	0.00053021	15185
Stat3	4035.88	0.264569	0.0807917	3.27471	0.0010577	0.00829858	20848
Arnt	1441.48	-0.330765	0.0788035	-4.19734	2.70064e-05	0.000352864	11863
Bola1	911.947	-0.549641	0.0980666	-5.60477	2.08526e-08	5.63486e-07	69168
Atf4	4772.97	0.267617	0.0652963	4.0985	4.1583e-05	0.000515208	11911
Rbm15	2764.35	-0.245281	0.0621074	-3.94931	7.83779e-05	0.000905671	229700
Plag1	738.655	-0.565492	0.127922	-4.42058	9.84341e-06	0.000145783	56711
Med16	2564.5	0.268133	0.0630393	4.25343	2.1052e-05	0.000284596	216154
Maged1	28990.3	0.272698	0.0794693	3.43148	0.000600288	0.00515927	94275
Hdac9	1601.69	0.28413	0.0666089	4.26565	1.99322e-05	0.000271278	79221
Flii	3086.25	0.284635	0.0752293	3.78356	0.000154599	0.00163132	14248
Rbbp7	8886.14	0.290121	0.0605662	4.79015	1.66658e-06	3.04657e-05	245688
Mllt3	3010.93	-0.210051	0.0570735	-3.68036	0.000232909	0.00230213	70122
Glis1	32.4959	-1.27101	0.316849	-4.01142	6.03549e-05	0.000718702	230587
Cited4	220.517	-0.830966	0.149426	-5.56106	2.68135e-08	7.07951e-07	56222
Pcbp1	1935.5	0.295604	0.090581	3.26342	0.00110077	0.00859056	23983
Zfp467	1022.82	0.295953	0.0801141	3.69415	0.000220627	0.00219764	68910
Sfpq	7233.04	-0.213316	0.0620874	-3.43574	0.000590933	0.00510054	71514
Zbtb8a	427.998	-1.01231	0.147808	-6.84885	7.44483e-12	3.6448e-10	73680
Arid1a	2323.1	-0.322407	0.0988663	-3.26104	0.00111003	0.00865169	93760
Hif1a	6251.64	0.303415	0.0728893	4.16268	3.1454e-05	0.000402581	15251
Aip	1491.47	0.307055	0.0677434	4.53263	5.8255e-06	9.13089e-05	11632
Rora	5559.87	0.307346	0.0669803	4.5886	4.46226e-06	7.22838e-05	19883
Dmtf1	4055.57	-0.327003	0.0720603	-4.53791	5.68145e-06	8.92825e-05	23857
Dnajc2	2560.07	-0.259174	0.0720921	-3.59503	0.000324351	0.00307023	22791
Kmt2e	4316.35	-0.235697	0.0712271	-3.30909	0.000936008	0.00749333	69188
Sqstm1	29908.7	0.308322	0.0608183	5.06957	3.98721e-07	8.33455e-06	18412
Zbtb49	1048.94	-0.339877	0.088995	-3.81905	0.000133965	0.00144511	75079
Tsc22d2	2513.31	0.31014	0.0775897	3.99718	6.41026e-05	0.000756254	72033
Homez	753.724	0.313311	0.0838678	3.73577	0.00018714	0.00190889	239099
Zfp644	13693.3	-0.275192	0.0779526	-3.53025	0.000415169	0.00377902	52397
Mtf2	4621.74	-0.229438	0.0513175	-4.47096	7.78698e-06	0.00011852	17765
Tfcp2	1545.14	0.313907	0.0730459	4.2974	1.72814e-05	0.000239542	21422
Dynll1	10695	-0.196134	0.0522935	-3.75064	0.000176386	0.00181837	56455
Tub	7924.14	0.315941	0.0808079	3.90978	9.23788e-05	0.0010494	22141
Actl6b	2707.09	-0.281701	0.0790599	-3.56314	0.000366452	0.00339825	83766
Zfp68	3523.17	-0.248712	0.0597212	-4.16456	3.1196e-05	0.000399828	24135
Cdk8	2588.78	-0.30019	0.0643986	-4.66144	3.14002e-06	5.29946e-05	264064
Hsph1	9263.27	-0.648171	0.0858233	-7.5524	4.27325e-14	2.74863e-12	15505
Pknox1	1384.94	0.321212	0.0881555	3.6437	0.00026875	0.00261623	18771
Lrrfip2	2156.26	0.326075	0.0857496	3.80264	0.000143162	0.00152594	71268
Ezh2	1035.87	-0.805455	0.127585	-6.31307	2.73561e-10	1.05688e-08	14056
Bag1	4983.3	0.331966	0.0708292	4.68685	2.77438e-06	4.75537e-05	12017
Srebf1	6549.04	0.334005	0.0953118	3.50434	0.000457739	0.00410472	20787
Prdm5	898.79	-0.602278	0.144043	-4.18125	2.89916e-05	0.000374752	70779
Egr4	401.236	-0.71269	0.183198	-3.89027	0.000100134	0.00112535	13656
Nfxl1	837.967	0.336673	0.0791958	4.25115	2.1268e-05	0.000287356	100978
Gmcl1	1655.01	-0.29695	0.0791683	-3.75087	0.000176224	0.00181748	23885
Smad3	5540.29	0.33999	0.0606401	5.60668	2.06243e-08	5.57942e-07	17127
Foxp1	16898.6	-0.381882	0.0769315	-4.96392	6.90833e-07	1.35946e-05	108655
Crebzf	5968.45	0.34913	0.0532301	6.55888	5.42149e-11	2.35402e-09	233490
Kdm5a	6884.13	-0.215001	0.0553545	-3.88407	0.000102723	0.00114963	214899
Foxj2	1037.19	-0.329656	0.0936105	-3.52157	0.000428993	0.00389314	60611
Ybx3	846.997	-0.413556	0.105442	-3.9221	8.77789e-05	0.00100229	56449
Bhlhe41	1561.77	-0.464922	0.0809209	-5.74539	9.17089e-09	2.68846e-07	79362
Pus1	540.604	0.355471	0.103879	3.42197	0.000621694	0.00531224	56361
Gatad2a	1027.13	0.364448	0.0897903	4.05887	4.93098e-05	0.000601997	234366
Wwp2	2888.94	0.378313	0.0642639	5.88687	3.9357e-09	1.23457e-07	66894
Fosb	472.817	-0.885986	0.163903	-5.40556	6.46054e-08	1.59274e-06	14282
Pcbp4	6167.53	0.379761	0.0655556	5.79297	6.91529e-09	2.09058e-07	59092
Zfp180	5575.05	-0.580347	0.0926173	-6.26607	3.70265e-10	1.3905e-08	210135
Zfp574	1069.67	-0.360887	0.0930382	-3.87892	0.000104923	0.00117208	232976
Zfp619	585.59	0.381836	0.113929	3.35152	0.000803688	0.00658219	70227
Zfp566	105.571	-0.843082	0.210529	-4.00459	6.2125e-05	0.000737252	72556
Zfp579	309.547	0.388496	0.118866	3.26837	0.0010817	0.0084608	68490
Dbp	3433.31	-0.407578	0.0894716	-4.55539	5.22885e-06	8.32519e-05	13170
Klf13	2843.27	-0.308954	0.094877	-3.25636	0.0011285	0.00877014	50794
Mef2a	10534.5	-0.333954	0.0720857	-4.63274	3.6086e-06	6.00647e-05	17258
Zfp710	1253.14	-0.380254	0.108818	-3.4944	0.000475128	0.00423552	209225
Cbx8	898.077	0.39077	0.09028	4.32843	1.50179e-05	0.000211659	30951
Cbfb	1449.35	0.412517	0.11102	3.71568	0.000202658	0.00204221	12400
Emsy	3187.81	-0.245593	0.0660696	-3.71718	0.00020146	0.00203182	233545
Zkscan17	353.901	0.424339	0.129041	3.28841	0.00100753	0.00797095	268417
Myt1	1905.94	0.435284	0.0743975	5.85079	4.89253e-09	1.517e-07	17932
Arntl	1766.47	-0.579159	0.0955111	-6.06378	1.32955e-09	4.58705e-08	11865
Mapk3	2421.78	-0.362023	0.0859049	-4.21422	2.50639e-05	0.000331241	26417
Zfp503	1217.97	0.436944	0.0980015	4.45854	8.25206e-06	0.000125048	218820
Ikzf5	223.792	-0.603488	0.151325	-3.98801	6.66289e-05	0.000782242	67143
Hes6	642.204	0.440469	0.133388	3.30216	0.000959417	0.0076554	55927
Zfp941	3856.28	0.45733	0.0743392	6.15194	7.65412e-10	2.76704e-08	407812
Zmat4	1030.86	-0.667026	0.118922	-5.60892	2.03597e-08	5.51399e-07	320158
Thap1	682.378	-0.359197	0.092096	-3.90025	9.60923e-05	0.00108649	73754
Zbtb22	2170.95	0.457722	0.0688577	6.64736	2.98391e-11	1.34502e-09	81630
Rfx4	980.403	0.458005	0.106036	4.31935	1.56489e-05	0.000219148	71137
Klf2	56.4995	-0.826712	0.241346	-3.42542	0.000613848	0.00525333	16598
Tsc22d1	28358	0.479096	0.0865963	5.53253	3.15652e-08	8.24411e-07	21807
Zfp319	829.899	-0.398507	0.0946511	-4.21028	2.55057e-05	0.000335978	79233
Hdac7	387.355	0.487845	0.133791	3.64631	0.000266035	0.00259229	56233
Arnt2	10811.9	0.488651	0.0761033	6.4209	1.35474e-10	5.50856e-09	11864
Uchl5	1156.58	0.490777	0.0769881	6.37472	1.833e-10	7.24365e-09	56207
Nfat5	3087.22	-0.314695	0.0802309	-3.92236	8.76852e-05	0.00100173	54446
Zbtb1	1316.28	0.496642	0.0756922	6.56133	5.33288e-11	2.31971e-09	268564
Zfp423	354.729	0.509979	0.136322	3.741	0.00018329	0.00187966	94187
Prdm10	1015.27	-0.399675	0.0853498	-4.68279	2.82999e-06	4.84382e-05	382066
Kmt2a	4781.06	-0.369646	0.0822035	-4.49672	6.90082e-06	0.000106507	214162
Arid3b	267.238	-1.30148	0.145289	-8.95783	3.31138e-19	3.62379e-17	56380
Vhl	5291.52	0.522862	0.0648158	8.06689	7.21102e-16	5.75573e-14	22346
Mycl	627.657	0.52523	0.0964455	5.44587	5.1552e-08	1.29603e-06	16918
Tcf12	3629.53	-0.200582	0.0606084	-3.30948	0.00093468	0.00748765	21406
Zfp280d	3333.21	-0.276219	0.0627778	-4.39994	1.08278e-05	0.00015823	235469
Tfdp2	4645.08	-0.267676	0.07367	-3.63345	0.000279659	0.00270542	211586
Zfp787	1385.14	0.52787	0.0793227	6.65472	2.83833e-11	1.28549e-09	67109
Dpf1	3326.52	0.549631	0.0637872	8.61665	6.89433e-18	6.75058e-16	29861
Nr2f1	514.89	0.584353	0.171785	3.40165	0.000669798	0.00565215	13865
Bclaf1	16368.4	-0.154463	0.0470398	-3.28367	0.00102465	0.00807991	72567
Ncoa7	2727.99	-0.525816	0.106463	-4.93898	7.85318e-07	1.52676e-05	211329
Zfp365	17124.9	-0.545046	0.0829939	-6.5673	5.12369e-11	2.23273e-09	216049
Basp1	6987.33	0.588203	0.124791	4.71348	2.43517e-06	4.24924e-05	70350
Zbtb7a	1725.79	-0.320516	0.0866262	-3.69999	0.000215606	0.00215562	16969
Ets2	5371.03	0.603882	0.0782637	7.71599	1.20047e-14	8.22476e-13	23872
Cry1	1724.59	-0.382148	0.118435	-3.22665	0.00125247	0.0095676	12952
Purb	32610.8	-0.223784	0.0641482	-3.48854	0.000485661	0.00431035	19291
Lrrfip1	2816.23	0.615296	0.107978	5.69833	1.20986e-08	3.45052e-07	16978
Dmrtc1a	377.728	0.626671	0.1491	4.20304	2.63358e-05	0.000345782	70887
Zfp7	276.521	0.628694	0.147921	4.2502	2.13577e-05	0.000288407	223669
Tcf7	242.614	-0.688682	0.187723	-3.6686	0.000243879	0.00240058	21414
Aff4	20463.3	-0.318675	0.0532313	-5.98661	2.14266e-09	7.11997e-08	93736
Pias3	609.61	0.653065	0.0985633	6.62584	3.45279e-11	1.53221e-09	229615
Trim11	2538.9	-0.215105	0.0665089	-3.23423	0.0012197	0.00936456	94091
Zfp641	800.82	0.656832	0.0981887	6.68949	2.23951e-11	1.02193e-09	239652
D630045J12Rik	2049.33	0.657296	0.0983972	6.68003	2.38897e-11	1.08604e-09	330286
Smad9	684.734	0.669235	0.088724	7.54288	4.59696e-14	2.949e-12	55994
Ncor1	10965.4	-0.219428	0.0567615	-3.86579	0.00011073	0.00122507	20185
Zfp286	1008.67	-0.297198	0.072761	-4.08458	4.41575e-05	0.000543486	192651
Per1	2562.95	-0.346383	0.0784484	-4.41543	1.0081e-05	0.000148483	18626
Zbtb4	5999.27	-0.352821	0.0597611	-5.90386	3.55098e-09	1.13149e-07	75580
Zfp3	1012.42	-0.607015	0.104444	-5.81185	6.17846e-09	1.88431e-07	193043
Med13	8151.58	-0.23036	0.0471187	-4.88893	1.01384e-06	1.93068e-05	327987
Hlf	3130.18	-0.574757	0.0937343	-6.13176	8.69095e-10	3.10016e-08	217082
Mbtd1	2039.51	-0.256748	0.0597888	-4.29424	1.75292e-05	0.000242669	103537
Spop	6316.78	-0.269259	0.0609245	-4.41955	9.89045e-06	0.000146337	20747
Mllt6	12154.7	-0.318734	0.0881511	-3.61577	0.000299459	0.00286594	246198
Nr1d1	995.268	-0.455089	0.117857	-3.86137	0.000112753	0.00124461	217166
Jup	2119.96	-0.71595	0.0742164	-9.64679	5.07189e-22	7.47949e-20	16480
Zfp618	446.033	0.669862	0.110164	6.08059	1.19742e-09	4.1549e-08	72701
Egln1	4538.86	0.669992	0.104598	6.40537	1.50004e-10	6.0565e-09	112405
Mta3	2075.44	0.706114	0.106348	6.63964	3.14452e-11	1.41357e-09	116871
Hdac5	6395.57	-0.239374	0.0668463	-3.58096	0.000342328	0.00321068	15184
Ddx5	60317.3	-0.18189	0.0481975	-3.77385	0.000160746	0.00167881	13207
Bptf	6102.77	-0.251437	0.0610422	-4.11908	3.80395e-05	0.000476924	207165
Sox9	608.595	-0.445149	0.128807	-3.45593	0.000548401	0.00478984	20682
Meis1	1966	0.720928	0.114418	6.30083	2.96054e-10	1.13113e-08	17268
Mybl1	356.536	0.734951	0.161925	4.53884	5.65653e-06	8.89488e-05	17864
Sox11	2852.68	0.772049	0.163287	4.72817	2.2655e-06	3.97614e-05	20666
Stat5a	226.49	0.793014	0.160269	4.94802	7.49708e-07	1.46578e-05	20850
Etv1	2683.57	-0.287153	0.0825913	-3.47679	0.00050745	0.00447744	14009
Baz1a	458.11	-1.15968	0.230108	-5.0397	4.6626e-07	9.59702e-06	217578
Nr2f6	959.566	0.798196	0.0975362	8.18359	2.75518e-16	2.30568e-14	13864
Cebpb	94.3409	0.8214	0.213653	3.84455	0.000120776	0.0013235	12608
Scand1	311.045	0.828273	0.221489	3.73957	0.000184338	0.00188828	19018
Cipc	7330.97	-0.207107	0.0641455	-3.22871	0.00124348	0.00951699	217732
Bcl11b	14498.8	-1.43049	0.130734	-10.942	7.25952e-28	1.86778e-25	58208
Cdk13	6429.29	-0.409293	0.0709218	-5.77105	7.87811e-09	2.34935e-07	69562
Pou6f2	40.0435	-1.31698	0.370639	-3.55326	0.000380495	0.00349628	218030
Gmnn	370.171	-0.402101	0.112575	-3.57186	0.000354456	0.00330094	57441
Rreb1	582.572	-1.94548	0.135433	-14.3649	8.59238e-47	5.93734e-44	68750
Jarid2	2938.41	-0.615899	0.0965183	-6.38117	1.75746e-10	6.9908e-09	16468
Phf2	897.873	-0.290838	0.088321	-3.29297	0.000991368	0.00787138	18676
Zfp346	1490.34	-0.270649	0.0813486	-3.32703	0.00087778	0.00710894	26919
Jdp2	1137.57	0.832359	0.0864337	9.63002	5.97172e-22	8.64826e-20	81703
Klf10	2237.35	0.837694	0.141506	5.91986	3.2221e-09	1.03902e-07	21847
Gtf2h2	1326.69	-0.387162	0.0911954	-4.24541	2.18198e-05	0.000293615	23894
Rarb	4384.62	-0.532241	0.0802762	-6.63012	3.3541e-11	1.49666e-09	218772
Thrb	2890.95	-0.637793	0.0646991	-9.85782	6.34105e-23	1.02925e-20	21834
Zfp711	991.976	0.853731	0.103158	8.27594	1.27444e-16	1.09299e-14	245595
Relb	414.357	0.858488	0.119602	7.1779	7.07925e-13	4.02851e-11	19698
Zmym2	7792.96	-0.241484	0.0573219	-4.21277	2.52255e-05	0.00033283	76007
Atf3	216.499	0.862242	0.262868	3.28013	0.0010376	0.00817142	11910
Dach1	4862.08	-0.455044	0.106591	-4.26906	1.96302e-05	0.000268034	13134
Klf5	526.871	-0.67643	0.179624	-3.7658	0.000166015	0.0017232	12224
Ctbp2	982.288	0.869191	0.128772	6.74984	1.48012e-11	6.95081e-10	13017
Ldb2	1364.39	0.901873	0.108003	8.3504	6.80296e-17	5.9397e-15	16826
Zfat	990.744	-0.3683	0.083368	-4.41776	9.97274e-06	0.000147247	380993
Mafa	155.657	-2.19484	0.2152	-10.199	2.00232e-24	3.69664e-22	378435
Ebf4	119.303	0.906586	0.243371	3.72512	0.000195222	0.00197555	228598
Cux2	1029.5	0.949239	0.0998551	9.50616	1.97822e-21	2.7339e-19	13048
Rbfox2	12499.8	-0.207944	0.0610464	-3.40633	0.00065842	0.00557364	93686
Irf1	398.726	0.97418	0.143768	6.77607	1.23485e-11	5.86735e-10	16362
Tef	29035.6	-0.37301	0.0608754	-6.12743	8.93087e-10	3.17637e-08	21685
Tcf20	24702.5	-0.460236	0.104572	-4.40116	1.07674e-05	0.000157633	21411
Zfp105	336.958	1.00589	0.179963	5.58945	2.27791e-08	6.12806e-07	22646
Hsf4	325.421	1.03521	0.175603	5.89518	3.74278e-09	1.18326e-07	26386
Kmt2d	2901.16	-0.456949	0.111199	-4.1093	3.96864e-05	0.000495005	381022
Smarcd1	2636.7	-0.379309	0.0712275	-5.32531	1.00779e-07	2.39424e-06	83797
Trp73	90.9819	1.07694	0.328081	3.28256	0.00102871	0.00810928	22062
Crebbp	4629.4	-0.30718	0.0820322	-3.74463	0.000180663	0.00185613	12914
Carhsp1	7506.71	-0.255264	0.0733507	-3.48004	0.000501335	0.00442833	52502
Etv5	3368.06	-0.402776	0.0926586	-4.34689	1.38084e-05	0.000196214	104156
Zfp148	9645.43	-0.193656	0.0468068	-4.13735	3.51339e-05	0.000445109	22661
Gsk3b	11758.9	-0.368165	0.0690135	-5.33467	9.57161e-08	2.28744e-06	56637
Zbtb20	10912	-0.334489	0.0828166	-4.03891	5.36997e-05	0.000650279	56490
Usf3	2538.05	-0.311227	0.088695	-3.50896	0.000449869	0.00404765	207806
Nrip1	2260.7	-0.540396	0.0796539	-6.78429	1.16658e-11	5.58687e-10	268903
Paxbp1	3631.01	-0.236643	0.0664458	-3.56144	0.00036883	0.00341507	67367
Bhlhe22	191.603	1.12644	0.224041	5.02785	4.96011e-07	1.01575e-05	59058
Prdm15	1315.16	-0.340744	0.0814243	-4.1848	2.85421e-05	0.000369733	114604
Phf1	1149.65	-0.42615	0.102041	-4.17625	2.96354e-05	0.000382054	21652
Zfp367	1654.12	1.21286	0.0969313	12.5125	6.37597e-36	2.61361e-33	238673
Zfp799	2329.5	-0.224446	0.0672052	-3.3397	0.000838677	0.00682713	240064
Lmo1	362.176	1.23623	0.153686	8.04383	8.70703e-16	6.85927e-14	109594
Pbx2	2947.29	-0.322027	0.0742604	-4.33646	1.44795e-05	0.000204788	18515
Atf6b	1665.69	-0.331182	0.0765636	-4.32558	1.52131e-05	0.000213788	12915
Srf	2054.09	-0.257471	0.0786829	-3.27226	0.00106692	0.00835877	20807
Trerf1	290.405	-0.48622	0.135528	-3.5876	0.000333732	0.00314548	224829
Zbtb7c	437.173	1.49879	0.451033	3.323	0.000890533	0.00718637	207259
Six3	415.528	-0.524944	0.150701	-3.48334	0.000495199	0.00438535	20473
Foxn2	2910.96	-0.397458	0.0914071	-4.34821	1.37251e-05	0.000195145	14236
Crem	825.775	-0.475342	0.102853	-4.62158	3.80834e-06	6.2956e-05	12916
Zeb1	7156.82	-0.280858	0.0598933	-4.68931	2.74129e-06	4.70867e-05	21417
Egr1	2932.5	-0.580083	0.088644	-6.54397	5.99074e-11	2.58264e-09	13653
Pura	9535.28	-0.194488	0.0564708	-3.44405	0.000573079	0.00496355	19290
Tgfb1i1	96.7387	1.64188	0.237722	6.90673	4.95938e-12	2.48328e-10	21804
Onecut2	2180.47	-0.616871	0.12593	-4.89854	9.65497e-07	1.84298e-05	225631
Zfp532	3029.76	-0.292037	0.0695907	-4.19649	2.7108e-05	0.000353808	328977
Mbd2	2451.38	-0.349554	0.0826769	-4.22795	2.35828e-05	0.000313897	17191
Grhl1	585.421	1.95025	0.204056	9.55744	1.20703e-21	1.72733e-19	195733
Zfp236	4032.65	-0.518679	0.0693626	-7.4778	7.55795e-14	4.76013e-12	329002
Scx	217.886	2.1101	0.164053	12.8623	7.3354e-38	3.22558e-35	20289
Sf1	866.209	-0.334206	0.0763922	-4.37487	1.21505e-05	0.000174917	22668
Myrf	821.824	-0.290589	0.0862211	-3.37028	0.000750923	0.00623235	225908
Tle4	6657.67	-0.614693	0.082519	-7.4491	9.39762e-14	5.87291e-12	21888
Klf9	17002.8	-0.231536	0.0548088	-4.22443	2.39549e-05	0.000318149	16601
Jak2	5703.31	-0.309172	0.0534474	-5.7846	7.26862e-09	2.18646e-07	16452
Pcgf5	1895.64	-0.456087	0.0716541	-6.36512	1.95136e-10	7.67375e-09	76073
Lcor	2492.04	-0.270071	0.0627241	-4.30569	1.66463e-05	0.000232041	212391
Btrc	5566.87	-0.226879	0.0620914	-3.65396	0.000258227	0.00252536	12234
Zfp804b	112.084	2.15264	0.341429	6.30479	2.88579e-10	1.10782e-08	207618
Elk1	2091.56	-0.37809	0.0726869	-5.20163	1.97549e-07	4.39937e-06	13712
Smarca1	8166.07	-0.302934	0.0619823	-4.88744	1.02158e-06	1.94389e-05	93761
Zfp385c	59.864	2.21017	0.282654	7.81936	5.30945e-15	3.77673e-13	278304
Flna	8086.1	-0.478045	0.0848135	-5.63643	1.73613e-08	4.82624e-07	192176
Zfx	2763.52	-0.236458	0.0610114	-3.87564	0.000106346	0.00118361	22764
Sox3	71.9951	2.28342	0.275424	8.29057	1.1271e-16	9.73534e-15	20675
Zxdb	1238.86	-0.279283	0.0766495	-3.64363	0.000268816	0.00261623	668166
Ogt	17846.9	-0.306675	0.0546335	-5.61331	1.98487e-08	5.39372e-07	108155
Msc	57.9965	2.45634	0.307618	7.98502	1.40499e-15	1.06855e-13	17681
Pou3f4	2636.05	-0.365618	0.0941187	-3.88465	0.000102478	0.00114742	18994
Bnc2	153.873	2.87344	0.222937	12.889	5.18846e-38	2.32376e-35	242509
Pou4f3	21.3834	3.32907	0.543946	6.12021	9.34502e-10	3.31392e-08	18998
Kdm5c	5830.34	-0.189327	0.0566504	-3.34203	0.000831672	0.00678152	20591
Rps6ka3	4950.24	-0.285613	0.0738084	-3.86965	0.000108992	0.00120916	110651
Klf14	75.5246	4.11046	0.371175	11.0742	1.67385e-28	4.49802e-26	619665

## Sheet: GO_up
	ONTOLOGY	ID	Description	GeneRatio	BgRatio	pvalue	p.adjust	qvalue	geneID	Count
GO:0050808	BP	GO:0050808	synapse organization	66/1478	479/23328	2.14819e-09	1.17248e-05	1.04832e-05	Ppfia4/Prnp/Syndig1/Ghsr/Mfn1/Glrb/Sema4a/Chrnb2/Unc13b/Ptprf/Rims3/Adgrb2/Ephb2/Clstn1/Agrn/Fzd1/Rheb/Dok7/Ssh1/Cux2/Ache/Elfn1/Sdk1/Oxtr/Camk1/Vhl/Iqsec3/Caprin2/Shank1/Ppfia3/Mesd/Apbb1/Glra3/Rab3a/Egln1/Kirrel3/Cadm1/Tpbg/Cacna2d2/Sema3f/Plxnb1/Ctnnb1/Sparc/Ntn1/Itga3/Lrrn3/Lrfn5/Flrt2/Ndrg2/Nefl/Slitrk1/Slitrk6/Adgrb1/Nptxr/Pdgfb/Cacnb3/Eif4g1/Lrfn2/Ptprs/Pcdhb16/Afg3l2/Nrxn2/Hdac6/Cask/Slit…	66
GO:0007416	BP	GO:0007416	synapse assembly	33/1478	191/23328	1.32301e-07	0.000722101	0.00025692	Syndig1/Ghsr/Sema4a/Chrnb2/Adgrb2/Ephb2/Clstn1/Agrn/Fzd1/Cux2/Ache/Sdk1/Oxtr/Shank1/Kirrel3/Cadm1/Tpbg/Plxnb1/Ntn1/Lrrn3/Lrfn5/Flrt2/Slitrk1/Slitrk6/Adgrb1/Nptxr/Pdgfb/Eif4g1/Ptprs/Pcdhb16/Nrxn2/Slitrk4/Efnb1	33
GO:0010959	BP	GO:0010959	regulation of metal ion transport	56/1478	427/23328	1.91038e-07	0.00104269	0.00025692	Dpp10/Atp2b4/Atp1b1/Rgs4/Nos1ap/Slc30a10/Lrrc55/Chp1/Prnp/Fkbp1a/Oprl1/Trpc3/Camk2d/Chd7/Nkain3/Creb3/Ptpn3/Kcnab2/Agrn/Kcnh2/Nos3/Ywhah/Stim2/Iscu/Adcyap1r1/Scn1b/Cemip/Drd4/Saraf/Homer3/Wwp2/Atp2c2/Trpc6/Npsr1/Scn5a/Ctnnb1/Akap7/Nkain2/Trdn/Jsrp1/Stc2/Kcnip1/Trpv2/Arrb2/Cacna1g/Hap1/Crhr1/Hspa2/Glrx/Kcns2/Pdgfb/Atf4/Cacnb3/Cask/Rgn/G6pdx	56
GO:0042391	BP	GO:0042391	regulation of membrane potential	58/1478	450/23328	2.1059e-07	0.0011494	0.00025692	Pid1/Bok/Atp1b1/Rgs4/Src/Mfn1/Glrb/Npy2r/Chrnb2/Pias3/Kcnd3/Camk2d/Unc13b/Ptpn3/Rims3/Kcnab2/Agrn/Kcnh2/Ywhah/Ssh1/Cux2/Tac1/Bid/Kcnk6/Scn1b/Shank1/Trpm4/Drd4/Glra3/Wwp2/Tmem25/Chrnb4/Hcn4/Tusc2/Scn5a/Scn11a/Xirp1/Hebp2/Akap7/Trdn/Slc1a6/Kcnip1/P2rx5/Cacna1g/Atp5g1/Ntsr2/Begain/Glrx/Kcnk9/Cacnb3/Kcnh3/Pkp2/Grik1/Slc29a1/Kcnh8/Kcnn2/Grk2/Kcnk4	58
GO:0034765	BP	GO:0034765	regulation of ion transmembrane transport	61/1478	489/23328	3.25003e-07	0.00177387	0.000269988	Kcnb2/Dpp10/Atp2b4/Atp1b1/Rgs4/Nos1ap/Kcnj9/Kcnj3/Lrrc55/Chp1/Prnp/Fkbp1a/Oprl1/Kcnd3/Camk2d/Chd7/Ptpn3/Ephb2/Kcnab2/Agrn/Kcnh2/Ywhah/Stim2/Iscu/Scn1b/Shank1/Kcnc3/Cemip/Drd4/Wwp2/Kcng4/Trpc6/Npsr1/Hcn4/Cacna2d2/Scn5a/Scn11a/Akap7/Trdn/Hk1/Jsrp1/Kcnip1/Hap1/Crhr1/Cacng5/Hspa2/Coa8/Glrx/Rasgrf2/Kcns2/Kcnv1/Cacnb3/Kcnh3/Clcn2/Ifngr2/Slc9a3r2/Kcnh8/Kcnk4/Acsl5/Rgn/G6pdx	61
GO:0071805	BP	GO:0071805	potassium ion transmembrane transport	33/1478	200/23328	3.99099e-07	0.00217828	0.000269988	Kcnb2/Dpp10/Atp1b1/Rgs4/Kcnj9/Kcnj3/Lrrc55/Prnp/Slc24a3/Kcnd3/Kcnab2/Agrn/Kcnh2/Kcnk6/Kcnc3/Kcnn1/Slc9a5/Wwp2/Kcng4/Hcn4/Slc9a9/Akap7/Kcnip1/Slc24a4/Kcns2/Kcnv1/Kcnk9/Kcnh3/Kcnh8/Kcnn2/Kcng2/Kcnk4/Slc9a7	33
GO:0090407	BP	GO:0090407	organophosphate biosynthetic process	55/1478	427/23328	4.40798e-07	0.00240588	0.000269988	Pid1/Dgkd/Etnk2/Nmnat2/Uck2/Itpkb/Pdk1/Cds2/Mocs3/Pmvk/Ampd2/Ak5/Ak4/Fabp3/Dhdds/Nos3/Dgkq/Zp3/Adcyap1r1/Itpkc/Idh2/Agpat5/Gcdh/Ldhd/Mvd/Aprt/Plcd1/Agpat3/Pdxk/Pemt/Pigs/Nme1/Atp5g1/Stat3/Pgs1/Cmpk2/Sh3yl1/Pygl/Ckb/Adssl1/Adcy2/Lpcat1/Hmgcs1/Gpaa1/Pdgfb/Pnpla3/Adcy6/Dgkg/Gart/Pip5k1b/Acsl5/G6pdx/Prps1/Acsl4/Ctps2	55
GO:0001558	BP	GO:0001558	regulation of cell growth	56/1478	438/23328	4.42602e-07	0.00241572	0.000269988	Sema4c/Rgs4/Avp/Sema4a/Sema6c/Creb3/Plaa/Mad2l2/Clstn1/Atad3a/Sema3d/Cgref1/Rasal1/Plxna4/Mtpn/Sema4f/Cpne9/Caprin2/Dact3/Apbb1/Usp47/Syt17/Ddx49/Ppan/Islr2/Smad3/Sema3f/Epm2a/Sesn1/Cirbp/Trpv2/Ntn1/Atp5g1/Igfbp4/Krt17/Eif2b2/Gng4/Cdhr2/Sema3g/Cgrrf1/Extl3/Acvr1b/Nubp1/Eif4g1/Tomm70a/Cdkn1a/Ptprs/Lgi1/Slit1/Zfyve27/Kazald1/Plxna3/G6pdx/Acsl4/Tro/Rbbp7	56
GO:0034703	CC	GO:0034703	cation channel complex	40/1487	222/23271	2.33761e-09	1.48204e-06	1.19587e-06	Kcnb2/Dpp10/Nos1ap/Ptpa/Kcnj3/Lrrc55/Snap25/Trpc3/Kcnd3/Olfm3/Kcnab2/Kcnh2/Calm3/Catsperg1/Scn1b/Shank1/Kcnc3/Trpm4/Kcng4/Trpc6/Olfm2/Hcn4/Cacna2d2/Scn5a/Scn11a/Trdn/Vwc2/Kcnip1/Cacna1g/Atp5g1/Cacng5/Hspa2/Calm1/Abhd6/Kcns2/Kcnv1/Cacnb3/Grik1/Kcng2/Kcnk4	40
GO:0034702	CC	GO:0034702	ion channel complex	45/1487	296/23271	5.5024e-08	3.48852e-05	1.10209e-05	Kcnb2/Dpp10/Nos1ap/Ptpa/Kcnj3/Lrrc55/Snap25/Trpc3/Glrb/Chrnb2/Kcnd3/Olfm3/Kcnab2/Kcnh2/Calm3/Catsperg1/Scn1b/Shank1/Kcnc3/Trpm4/Glra3/Kcng4/Trpc6/Olfm2/Chrnb4/Hcn4/Cacna2d2/Scn5a/Scn11a/Trdn/Vwc2/Kcnip1/Cacna1g/Atp5g1/Cacng5/Hspa2/Calm1/Abhd6/Kcns2/Kcnv1/Cacnb3/Clcn2/Grik1/Kcng2/Kcnk4	45
GO:1990351	CC	GO:1990351	transporter complex	47/1487	319/23271	7.44771e-08	4.72185e-05	1.10209e-05	Kcnb2/Dpp10/Atp1b1/Nos1ap/Ptpa/Kcnj3/Timm10/Lrrc55/Snap25/Trpc3/Glrb/Chrnb2/Kcnd3/Olfm3/Kcnab2/Kcnh2/Calm3/Catsperg1/Scn1b/Shank1/Kcnc3/Trpm4/Glra3/Kcng4/Trpc6/Olfm2/Chrnb4/Hcn4/Cacna2d2/Scn5a/Scn11a/Trdn/Vwc2/Kcnip1/Cacna1g/Atp5g1/Cacng5/Hspa2/Calm1/Abhd6/Kcns2/Kcnv1/Cacnb3/Clcn2/Grik1/Kcng2/Kcnk4	47
GO:1902495	CC	GO:1902495	transmembrane transporter complex	46/1487	312/23271	1.00113e-07	6.34716e-05	1.10209e-05	Kcnb2/Dpp10/Atp1b1/Nos1ap/Ptpa/Kcnj3/Lrrc55/Snap25/Trpc3/Glrb/Chrnb2/Kcnd3/Olfm3/Kcnab2/Kcnh2/Calm3/Catsperg1/Scn1b/Shank1/Kcnc3/Trpm4/Glra3/Kcng4/Trpc6/Olfm2/Chrnb4/Hcn4/Cacna2d2/Scn5a/Scn11a/Trdn/Vwc2/Kcnip1/Cacna1g/Atp5g1/Cacng5/Hspa2/Calm1/Abhd6/Kcns2/Kcnv1/Cacnb3/Clcn2/Grik1/Kcng2/Kcnk4	46
GO:0097060	CC	GO:0097060	synaptic membrane	61/1487	470/23271	1.07714e-07	6.82909e-05	1.10209e-05	Sema4c/Atp2b4/Kcnj9/Kcnj3/Snap25/Syndig1/Snph/Ghsr/Glrb/Chrnb2/Kcnd3/Unc13b/Clta/Ptprf/Rims3/Ephb2/Clstn1/Otof/Nsg1/Kctd8/Hip1r/Ache/Grm8/Sema4f/Slc6a11/Iqsec3/Shank1/Kcnc3/Apbb1/Drd4/Glra3/Olfm2/Cadm1/Chrnb4/Grm2/Scn11a/Ctnnb1/Slc1a6/Canx/Arrb2/Flot2/Itga3/Cacng5/Slc16a3/Lrfn5/Cltb/Abhd6/Slitrk1/Adgrb1/Faim2/Comt/Grik1/Lrfn2/Ptprs/Pcdhb16/Nrxn2/Stx3/Syp/Cask/Atp2b3/Efnb1	61
GO:0042734	CC	GO:0042734	presynaptic membrane	33/1487	198/23271	3.81146e-07	0.000241647	3.24977e-05	Atp2b4/Kcnj9/Kcnj3/Snap25/Snph/Chrnb2/Unc13b/Clta/Rims3/Ephb2/Otof/Ache/Grm8/Slc6a11/Kcnc3/Apbb1/Drd4/Cadm1/Grm2/Scn11a/Ctnnb1/Slc1a6/Canx/Flot2/Cltb/Grik1/Ptprs/Nrxn2/Stx3/Syp/Cask/Atp2b3/Efnb1	33
GO:0034705	CC	GO:0034705	potassium channel complex	20/1487	90/23271	7.75465e-07	0.000491645	5.66731e-05	Kcnb2/Dpp10/Nos1ap/Kcnj3/Lrrc55/Snap25/Kcnd3/Kcnab2/Kcnh2/Calm3/Kcnc3/Kcng4/Hcn4/Kcnip1/Calm1/Kcns2/Kcnv1/Grik1/Kcng2/Kcnk4	20
GO:0030133	CC	GO:0030133	transport vesicle	46/1487	339/23271	1.12619e-06	0.000714007	7.20171e-05	Sema4c/Stx6/Chp1/Snap25/Syndig1/Rab2a/Unc13b/Clta/Rab3b/Pef1/Otof/Slc30a3/Fgfr3/Cav2/Syt5/Clcn4/Calm3/Apba2/Vps33b/Rab6a/Syt17/Npy1r/Rab3a/Atp6v0d1/Yipf2/Kirrel3/Cadm1/Rab27a/Akap7/Sar1a/Snap47/Gosr2/Calm1/Clba1/Cltb/Synpr/Vdac2/Slc18a3/Kcnk9/Atp6v1g2/Ptprs/Dpysl3/Syt12/Stx3/Clcn5/Syp	46
GO:0008076	CC	GO:0008076	voltage-gated potassium channel complex	18/1487	78/23271	1.52766e-06	0.000968537	8.68355e-05	Kcnb2/Dpp10/Nos1ap/Kcnj3/Lrrc55/Snap25/Kcnd3/Kcnab2/Kcnh2/Calm3/Kcnc3/Kcng4/Hcn4/Kcnip1/Calm1/Kcns2/Kcnv1/Kcng2	18
GO:0070382	CC	GO:0070382	exocytic vesicle	38/1487	261/23271	1.72459e-06	0.00109339	8.82265e-05	Sema4c/Stx6/Snap25/Syndig1/Rab2a/Unc13b/Clta/Rab3b/Otof/Slc30a3/Syt5/Clcn4/Calm3/Apba2/Vps33b/Rab6a/Syt17/Npy1r/Rab3a/Atp6v0d1/Kirrel3/Cadm1/Rab27a/Akap7/Snap47/Calm1/Cltb/Synpr/Vdac2/Slc18a3/Kcnk9/Atp6v1g2/Ptprs/Dpysl3/Syt12/Stx3/Clcn5/Syp	38
GO:0012506	CC	GO:0012506	vesicle membrane	46/1487	363/23271	7.28852e-06	0.00462092	0.000338968	Sema4c/Mreg/Pam/Stx6/Syndig1/Rab2a/Unc13b/Clta/Rab3b/Pef1/Nos3/Otof/Slc30a3/Dgkq/Kdelr2/Cav2/Ccdc136/Syt5/Ap2s1/Calm3/Cemip/Drd4/Rab3a/Rab27a/Tmed3/Copb2/Myrip/Sar1a/Sparc/Snap47/Flot2/Tmem199/Gosr2/Grb2/Calm1/Clba1/Cltb/Synpr/Slc18a3/Enthd1/Aqp5/Snx9/Atp6v1g2/Ptprs/Stx3/Syp	46
GO:0015267	MF	GO:0015267	channel activity	62/1467	461/22669	3.57015e-08	3.50945e-05	1.50322e-05	Kcnb2/Kcnj9/Kcnj3/Lrrc55/Snap25/Slc24a3/Trpc3/Glrb/Chrnb2/Kcnd3/Gjb3/Kcnab2/Kcnh2/Mpv17/Stim2/Tmem150c/Orai2/Clcn4/Kcnk6/Scn1b/Kcnc3/Trpm4/Aqp11/Orai3/Rasa3/Glra3/Kcnn1/Cngb1/Kcng4/Trpc6/Chrnb4/Tmem266/Hcn4/Cacna2d2/Scn5a/Scn11a/Ano10/Ano4/Kcnip1/Trpv2/P2rx5/Cacna1g/Atp5g1/Cacng5/Tmem63c/Slc24a4/Vdac2/Gja3/Kcns2/Kcnv1/Kcnk9/Pkdrej/Cacnb3/Kcnh3/Aqp5/Clcn2/Grik1/Kcnh8/Kcnn2/Kcng2/Kcnk4/Clcn5	62
GO:0022803	MF	GO:0022803	passive transmembrane transporter activity	62/1467	461/22669	3.57015e-08	3.50945e-05	1.50322e-05	Kcnb2/Kcnj9/Kcnj3/Lrrc55/Snap25/Slc24a3/Trpc3/Glrb/Chrnb2/Kcnd3/Gjb3/Kcnab2/Kcnh2/Mpv17/Stim2/Tmem150c/Orai2/Clcn4/Kcnk6/Scn1b/Kcnc3/Trpm4/Aqp11/Orai3/Rasa3/Glra3/Kcnn1/Cngb1/Kcng4/Trpc6/Chrnb4/Tmem266/Hcn4/Cacna2d2/Scn5a/Scn11a/Ano10/Ano4/Kcnip1/Trpv2/P2rx5/Cacna1g/Atp5g1/Cacng5/Tmem63c/Slc24a4/Vdac2/Gja3/Kcns2/Kcnv1/Kcnk9/Pkdrej/Cacnb3/Kcnh3/Aqp5/Clcn2/Grik1/Kcnh8/Kcnn2/Kcng2/Kcnk4/Clcn5	62
GO:0005261	MF	GO:0005261	cation channel activity	48/1467	327/22669	8.87172e-08	8.7209e-05	2.1137e-05	Kcnb2/Kcnj9/Kcnj3/Lrrc55/Snap25/Slc24a3/Trpc3/Chrnb2/Kcnd3/Kcnab2/Kcnh2/Stim2/Orai2/Kcnk6/Scn1b/Kcnc3/Trpm4/Orai3/Rasa3/Kcnn1/Cngb1/Kcng4/Trpc6/Chrnb4/Hcn4/Cacna2d2/Scn5a/Scn11a/Ano10/Kcnip1/Trpv2/P2rx5/Cacna1g/Atp5g1/Cacng5/Tmem63c/Slc24a4/Kcns2/Kcnv1/Kcnk9/Pkdrej/Cacnb3/Kcnh3/Grik1/Kcnh8/Kcnn2/Kcng2/Kcnk4	48
GO:0005216	MF	GO:0005216	ion channel activity	57/1467	421/22669	1.00401e-07	9.8694e-05	2.1137e-05	Kcnb2/Kcnj9/Kcnj3/Lrrc55/Snap25/Slc24a3/Trpc3/Glrb/Chrnb2/Kcnd3/Kcnab2/Kcnh2/Stim2/Tmem150c/Orai2/Clcn4/Kcnk6/Scn1b/Kcnc3/Trpm4/Orai3/Rasa3/Glra3/Kcnn1/Cngb1/Kcng4/Trpc6/Chrnb4/Tmem266/Hcn4/Cacna2d2/Scn5a/Scn11a/Ano10/Ano4/Kcnip1/Trpv2/P2rx5/Cacna1g/Atp5g1/Cacng5/Tmem63c/Slc24a4/Vdac2/Kcns2/Kcnv1/Kcnk9/Pkdrej/Cacnb3/Kcnh3/Clcn2/Grik1/Kcnh8/Kcnn2/Kcng2/Kcnk4/Clcn5	57
GO:0046873	MF	GO:0046873	metal ion transmembrane transporter activity	57/1467	426/22669	1.50436e-07	0.000147879	2.53366e-05	Kcnb2/Slc39a10/Atp2b4/Atp1b1/Kcnj9/Slc30a10/Kcnj3/Slc4a10/Lrrc55/Snap25/Slc24a3/Trpc3/Kcnd3/Kcnab2/Kcnh2/Slc30a3/Stim2/Orai2/Slc6a11/Kcnk6/Scn1b/Kcnc3/Trpm4/Orai3/Rasa3/Tusc3/Kcnn1/Slc9a5/Kcng4/Atp2c2/Trpc6/Hcn4/Slc9a9/Cacna2d2/Scn5a/Scn11a/Slc1a6/Slc6a15/Kcnip1/Trpv2/Slc13a5/Cacna1g/Cacng5/Slc24a4/Kcns2/Kcnv1/Kcnk9/Pkdrej/Cacnb3/Kcnh3/Grik1/Kcnh8/Kcnn2/Kcng2/Kcnk4/Slc9a7/Atp2b3	57
GO:0015079	MF	GO:0015079	potassium ion transmembrane transporter activity	29/1467	156/22669	2.33909e-07	0.000229932	3.28293e-05	Kcnb2/Atp1b1/Kcnj9/Kcnj3/Lrrc55/Snap25/Slc24a3/Kcnd3/Kcnab2/Kcnh2/Kcnk6/Kcnc3/Kcnn1/Slc9a5/Kcng4/Hcn4/Slc9a9/Kcnip1/Slc24a4/Kcns2/Kcnv1/Kcnk9/Kcnh3/Grik1/Kcnh8/Kcnn2/Kcng2/Kcnk4/Slc9a7	29
GO:0022836	MF	GO:0022836	gated channel activity	46/1467	323/22669	3.98803e-07	0.000392024	4.79763e-05	Kcnb2/Kcnj9/Kcnj3/Lrrc55/Snap25/Trpc3/Glrb/Chrnb2/Kcnd3/Kcnab2/Kcnh2/Tmem150c/Clcn4/Scn1b/Kcnc3/Trpm4/Rasa3/Glra3/Kcnn1/Cngb1/Kcng4/Chrnb4/Hcn4/Cacna2d2/Scn5a/Scn11a/Ano10/Kcnip1/P2rx5/Cacna1g/Atp5g1/Cacng5/Tmem63c/Vdac2/Kcns2/Kcnv1/Kcnk9/Cacnb3/Kcnh3/Clcn2/Grik1/Kcnh8/Kcnn2/Kcng2/Kcnk4/Clcn5	46
GO:0005244	MF	GO:0005244	voltage-gated ion channel activity	32/1467	190/22669	5.88168e-07	0.000578169	5.50333e-05	Kcnb2/Kcnj9/Kcnj3/Lrrc55/Snap25/Kcnd3/Kcnab2/Kcnh2/Clcn4/Scn1b/Kcnc3/Trpm4/Kcng4/Hcn4/Cacna2d2/Scn5a/Scn11a/Kcnip1/Cacna1g/Cacng5/Vdac2/Kcns2/Kcnv1/Kcnk9/Cacnb3/Kcnh3/Clcn2/Grik1/Kcnh8/Kcng2/Kcnk4/Clcn5	32
GO:0022832	MF	GO:0022832	voltage-gated channel activity	32/1467	190/22669	5.88168e-07	0.000578169	5.50333e-05	Kcnb2/Kcnj9/Kcnj3/Lrrc55/Snap25/Kcnd3/Kcnab2/Kcnh2/Clcn4/Scn1b/Kcnc3/Trpm4/Kcng4/Hcn4/Cacna2d2/Scn5a/Scn11a/Kcnip1/Cacna1g/Cacng5/Vdac2/Kcns2/Kcnv1/Kcnk9/Cacnb3/Kcnh3/Clcn2/Grik1/Kcnh8/Kcng2/Kcnk4/Clcn5	32
GO:0015077	MF	GO:0015077	monovalent inorganic cation transmembrane transporter activity	48/1467	361/22669	1.69635e-06	0.00166752	0.000142851	Kcnb2/Atp1b1/Kcnj9/Kcnj3/Slc4a10/Lrrc55/Snap25/Slc24a3/Kcnd3/Kcnab2/Kcnh2/Atp6v0e2/Slc6a11/Clcn4/Kcnk6/Scn1b/Kcnc3/Kcnn1/Slc9a5/Atp6v0d1/Kcng4/Atp2c2/Cox5a/Hcn4/Slc9a9/Scn5a/Scn11a/Slc1a6/Slc6a15/Kcnip1/Slc13a5/Slc46a1/Cacna1g/Atp5g1/Slc24a4/Kcns2/Kcnv1/Kcnk9/Kcnh3/Grik1/Atp6v1g2/Kcnh8/Kcnn2/Kcng2/Kcnk4/Cox8a/Clcn5/Slc9a7	48
GO:0005267	MF	GO:0005267	potassium channel activity	23/1467	120/22669	2.33425e-06	0.00229456	0.000178698	Kcnb2/Kcnj9/Kcnj3/Lrrc55/Snap25/Kcnd3/Kcnab2/Kcnh2/Kcnk6/Kcnc3/Kcnn1/Kcng4/Hcn4/Kcnip1/Kcns2/Kcnv1/Kcnk9/Kcnh3/Grik1/Kcnh8/Kcnn2/Kcng2/Kcnk4	23

## Sheet: GO_dn
	ONTOLOGY	ID	Description	GeneRatio	BgRatio	pvalue	p.adjust	qvalue	geneID	Count
GO:1990778	BP	GO:1990778	protein localization to cell periphery	52/1181	363/23328	1.23542e-11	6.47481e-08	5.3448e-08	Actr3/Cnst/Ppp2r5a/Cacnb2/Sec16a/Rapsn/Kcnip3/Tnik/Prkci/S100a10/Snx27/Pip5k1a/Gpsm2/Epb41/Kcnip4/Tesc/C2cd5/Sptbn4/Akt2/Kcnj11/Dlg2/Dchs1/Cacng3/Hras/Bbs2/Scn3b/Ptpn9/Dag1/Golga4/Map7/Epb41l2/Lin7a/Camk2b/Git1/Jup/Rab40b/Vti1b/Numb/Actn2/Ptch1/Fcho2/Rab3c/Slmap/Gsk3b/Zdhhc23/Pdpk1/Rab26/Myo5b/Sorbs1/Arl3/Flna/Wnk3	52
GO:0016311	BP	GO:0016311	dephosphorylation	52/1181	374/23328	3.83087e-11	2.00776e-07	8.28678e-08	Eya1/Sgpp2/Ppp1r7/Bcl2/Ptpn7/Cnst/Ppp2r5a/Spred1/Ppp1r16b/Slc7a14/Smg5/Cttnbp2nl/Pdp1/Rngtt/Plppr1/Ptprd/Ppp1cb/Pptc7/Ppm1k/Dusp11/Ptpro/Vrk3/Lmtk3/Ptpn5/Dlg2/Inpp5f/Lhpp/Ptpre/Ppp2r2d/Drd2/Ptpn9/Ppp1r12a/Ctdsp2/Inpp5j/Ctdnep1/Myo1d/Ppm1d/Akap1/Ppp1r1b/Ppp4r4/Vcan/Ppp3cb/Ppp2r2a/Ppm1f/Dusp1/Ppp2r5d/Sh3rf2/Ppp1ca/Plpp6/Jak2/Fra10ac1/Btrc	52
GO:0048511	BP	GO:0048511	rhythmic process	45/1181	301/23328	7.12931e-11	3.73647e-07	1.02812e-07	Per2/Top1/Cyp7b1/Noct/Ciart/Sfpq/Ppp1cb/Kcnd2/Ptn/Ezh2/Kdm5a/Grin2b/Bhlhe41/Dbp/Chrna7/Igf1r/Ntrk3/Arntl/Retn/Kmt2a/Drd2/Adora2a/Cry1/Ncor1/Per1/Hlf/Nr1d1/Ddx5/Cipc/Drd1/Kcnma1/Ep300/Tef/Crebbp/Gsk3b/Nrip1/Fbxl17/Six3/Crem/Egr1/Ppp1ca/Klf9/Btrc/Ogt/Kdm5c	45
GO:0099173	BP	GO:0099173	postsynapse organization	35/1181	200/23328	1.20319e-10	6.30592e-07	1.30135e-07	Epha4/Dock10/Ngef/Actr3/Zfp804a/Rapsn/Lzts3/Snx27/Musk/Ptprd/Wasf2/Ppp1r9a/Ptn/Grin2b/Shisa7/Arhgap33/Chrna7/Igf1r/Ntrk3/Insr/Arhgef7/Zfp365/Camk2b/Baiap2/Dgkb/Actn1/Numb/Shank3/Etv5/Chmp2b/Tiam1/Myo5b/Sorbs1/Arhgef9/Pak3	35
GO:0031346	BP	GO:0031346	positive regulation of cell projection organization	59/1181	478/23328	2.43753e-10	1.27751e-06	2.10911e-07	Arpc2/Epha4/Serpine2/Hdac4/Actr3/Syt2/Dab2ip/Myo3b/Zfp804a/Prkci/Skil/Ptprd/Ror1/Wasf2/Crocc/Dynll1/Auts2/Ppp1r9a/Ptn/Ezh2/Itpr1/Plxnd1/Ptpn5/Igf1r/Ntrk3/Hras/Unc13a/Golga4/Trak1/Fig4/Plk5/Camk2b/Baiap2/Kidins220/Numb/Ripor2/Rreb1/Cenpj/Ptk2b/Ep300/Shank3/Wnt1/Map3k13/Gsk3b/Tiam1/Pcp4/Tiam2/Srf/Ptk7/Ppp2r5d/Cdc42ep3/Nedd4l/Dcc/Myo5b/Mark2/Neurl1a/L1cam/Flna/Pak3	59
GO:0007623	BP	GO:0007623	circadian rhythm	36/1181	217/23328	3.08537e-10	1.61704e-06	2.22471e-07	Per2/Top1/Cyp7b1/Noct/Ciart/Sfpq/Ppp1cb/Kcnd2/Ezh2/Kdm5a/Bhlhe41/Dbp/Ntrk3/Arntl/Kmt2a/Drd2/Adora2a/Cry1/Ncor1/Per1/Nr1d1/Ddx5/Cipc/Drd1/Kcnma1/Ep300/Gsk3b/Nrip1/Fbxl17/Six3/Crem/Egr1/Ppp1ca/Btrc/Ogt/Kdm5c	36
GO:0050807	BP	GO:0050807	regulation of synapse organization	41/1181	277/23328	6.76568e-10	3.54589e-06	3.84922e-07	Epha4/Ngef/Actr3/Dab2ip/Zfp804a/Rapsn/Lzts3/Flrt3/Snx27/Musk/Ptprd/Ppp1r9a/Cttnbp2/Ptn/Grin2b/Ptpro/Shisa7/Arhgap33/Chrna7/Ntrk3/Adgrl1/Cdh8/Drd2/Camkv/Dag1/Camk2b/Arhgef15/Baiap2/Dgkb/Numb/Shank3/Etv5/Gsk3b/Chmp2b/Tiam1/Myo5b/Sorbs1/Neurl1a/Slitrk2/Arhgef9/Pak3	41
GO:0050803	BP	GO:0050803	regulation of synapse structure or activity	42/1181	289/23328	7.44199e-10	3.90035e-06	3.84922e-07	Epha4/Ngef/Actr3/Dab2ip/Zfp804a/Rapsn/Lzts3/Flrt3/Snx27/Musk/Ptprd/Ppp1r9a/Cttnbp2/Ptn/Grin2b/Ptpro/Shisa7/Arhgap33/Chrna7/Ntrk3/Adgrl1/Cdh8/Drd2/Camkv/Dag1/Slc17a8/Camk2b/Arhgef15/Baiap2/Dgkb/Numb/Shank3/Etv5/Gsk3b/Chmp2b/Tiam1/Myo5b/Sorbs1/Neurl1a/Slitrk2/Arhgef9/Pak3	42
GO:0006470	BP	GO:0006470	protein dephosphorylation	37/1181	235/23328	8.00751e-10	4.19673e-06	3.84922e-07	Eya1/Ppp1r7/Bcl2/Ptpn7/Ppp2r5a/Ppp1r16b/Cttnbp2nl/Pdp1/Ptprd/Ppp1cb/Pptc7/Ppm1k/Dusp11/Ptpro/Vrk3/Ptpn5/Lhpp/Ptpre/Ppp2r2d/Drd2/Ptpn9/Ppp1r12a/Ctdsp2/Ctdnep1/Ppm1d/Akap1/Ppp1r1b/Ppp4r4/Vcan/Ppp3cb/Ppp2r2a/Ppm1f/Dusp1/Ppp2r5d/Ppp1ca/Jak2/Btrc	37
GO:0042326	BP	GO:0042326	negative regulation of phosphorylation	57/1181	471/23328	1.03954e-09	5.44825e-06	4.4504e-07	Rnf149/Hdac4/Ppp2r5a/Dab2ip/Spred1/Trib3/Pmepa1/Fabp4/Foxo1/C9orf72/Shb/Zfyve28/Ppef2/Dynll1/Hsph1/Pbp2/Ptpro/Vrk3/Ptpn5/Chrna7/Igf1r/Ntrk3/Pde2a/Inpp5f/Insr/Snx25/Cyld/Chordc1/Sorl1/Drd2/Dag1/Ctdspl/Tnfaip3/Adora2a/Irak3/Ctdsp2/Inpp5j/Igfbp3/Spred2/Ncor1/Per1/Prkar2b/Atxn1/Drd1/Rgs14/Dmtn/Ppm1f/Gsk3b/Pcp4/Prdm15/Mas1/Pdpk1/Dusp1/Ppp2r5d/Sh3rf2/Sema6a/Ogt	57
GO:0032922	BP	GO:0032922	circadian regulation of gene expression	19/1181	70/23328	1.13155e-09	5.93045e-06	4.4504e-07	Per2/Top1/Noct/Ciart/Ppp1cb/Kdm5a/Bhlhe41/Arntl/Kmt2a/Drd2/Cry1/Ncor1/Per1/Nr1d1/Nrip1/Crem/Egr1/Ppp1ca/Ogt	19
GO:0050808	BP	GO:0050808	synapse organization	57/1181	479/23328	1.95046e-09	1.02223e-05	7.03191e-07	Epha4/Dock10/Ngef/Actr3/Cacnb2/Dab2ip/Zfp804a/Rapsn/Lzts3/Flrt3/Snx27/Musk/Ptprd/Wasf2/Ppp1r9a/Cttnbp2/Ptn/Plxnd1/Grin2b/Ptpro/Shisa7/Slc8a2/Arhgap33/Chrna7/Igf1r/Ntrk3/Insr/Arhgef7/Unc13a/Adgrl1/Cdh8/Drd2/Camkv/Dag1/Wasf1/Zfp365/Camk2b/Arhgef15/Baiap2/Dgkb/Actn1/Numb/Drd1/Shank3/Etv5/Gsk3b/Chmp2b/Tiam1/Myo5b/Sorbs1/Neurl1a/Slitrk2/L1cam/Flna/Arhgef9/Drp2/Pak3	57
GO:0045666	BP	GO:0045666	positive regulation of neuron differentiation	56/1181	472/23328	3.01522e-09	1.58028e-05	1.00345e-06	Epha4/Serpine2/Bcl2/Actr3/Syt2/Dab2ip/Zfp804a/Prkci/Skil/Ptprd/Ror1/Ppp1r9a/Ptn/Ezh2/Itpr1/Plxnd1/Ptpn5/Igf1r/Ntrk3/Gdpd5/Unc13a/Tcf12/Golga4/Trak1/Fig4/Plk5/Camk2b/Cyb5d2/Mmd/Baiap2/Gdf7/Kidins220/Numb/Rarb/Ptk2b/Ep300/Shank3/Map3k13/Etv5/Gsk3b/Tiam1/Pcp4/Tiam2/Srf/Ptk7/Ppp2r5d/Zeb1/Nedd4l/Dcc/Myo5b/Mark2/Neurl1a/L1cam/Flna/Nap1l2/Pak3	56
GO:0001933	BP	GO:0001933	negative regulation of protein phosphorylation	52/1181	425/23328	3.85987e-09	2.02296e-05	1.11589e-06	Rnf149/Dab2ip/Spred1/Trib3/Pmepa1/Fabp4/Foxo1/C9orf72/Shb/Zfyve28/Ppef2/Hsph1/Pbp2/Ptpro/Vrk3/Ptpn5/Chrna7/Igf1r/Ntrk3/Inpp5f/Insr/Snx25/Cyld/Chordc1/Sorl1/Drd2/Dag1/Ctdspl/Tnfaip3/Adora2a/Irak3/Ctdsp2/Inpp5j/Igfbp3/Spred2/Ncor1/Per1/Prkar2b/Drd1/Rgs14/Dmtn/Ppm1f/Gsk3b/Pcp4/Prdm15/Mas1/Pdpk1/Dusp1/Ppp2r5d/Sh3rf2/Sema6a/Ogt	52
GO:0042391	BP	GO:0042391	regulation of membrane potential	54/1181	450/23328	3.86897e-09	2.02773e-05	1.11589e-06	Bcl2/Rgs7/Kcnk2/Cacnb2/Scn3a/Chrna4/Casq2/Oprd1/Slc9a1/Slc25a33/Gabrd/Akap9/Slc26a5/Gabra4/Slc4a4/Ppp1r9a/Kcnd2/Ptn/Dgki/Foxp1/Kcna5/Kcna1/Grin2b/Slc8a2/Grik5/Akt2/Ffar3/Kcnj11/Chrna7/Ntrk3/Rnf122/Scn3b/Scn4b/Syne1/Ctnna3/Adora2a/Hcn2/Jup/Kcnh4/Cntnap1/Baiap2/Actn2/Atxn1/Drd1/Rgs7bp/Kcnma1/Slmap/Ptk2b/Kcnq3/Shank3/Gsk3b/Nedd4l/Kcnip2/Flna	54
GO:0015672	BP	GO:0015672	monovalent inorganic cation transport	57/1181	489/23328	4.17613e-09	2.18871e-05	1.1292e-06	Slc9a2/Hecw2/Asic4/Serpine2/Rgs7/Akt3/Kcnk2/Scn3a/Kcna4/Slc12a6/Kcnip3/Slc4a11/Kcns1/Kcnn3/Snx27/Casq2/Slc9b2/Slc24a2/Pcsk9/Slc9a1/Akap9/Kcnip4/Slc4a4/Tesc/Hvcn1/Kcnd2/Slc6a6/Kcna5/Kcna1/Slc8a2/Sptbn4/Akt2/Kcnj11/Abcc8/Kcnu1/Neto2/Scn3b/Scn4b/Fxyd2/Drd2/Hcn2/Slc17a8/Per1/Fgf11/Mllt6/Kcnh4/Actn2/Nnt/Kcnma1/Slmap/Ptk2b/Kcnq3/Ano6/Nedd4l/Kcnip2/Flna/Wnk3	57
GO:0018105	BP	GO:0018105	peptidyl-serine phosphorylation	44/1181	331/23328	4.99761e-09	2.61925e-05	1.27184e-06	Sgk3/Clk1/Bcl2/Akt3/Nek6/Myo3b/Tlk1/Top1/Prkci/Dclk1/Fnip2/Hipk1/Clspn/Oprd1/Akap9/Cdc7/Lmtk2/Sptbn4/Akt2/Vrk3/Chrna7/Ntrk3/Prkcb/Sbk1/Mapk3/Inpp5f/Phip/Camkv/Inpp5j/Camk2b/Ppp1r1b/Drd1/Plk2/Dmtn/Ppm1f/Map3k13/Gsk3b/Pdpk1/Plcl2/Stk32a/Rps6ka4/Mark2/Prkx/Ogt	44
GO:0043547	BP	GO:0043547	positive regulation of GTPase activity	34/1181	222/23328	7.95331e-09	4.16833e-05	1.91158e-06	Tbc1d8/Dock10/Ngef/Rgs7/Chn1/Ralgapa2/Tbc1d20/Ralgapb/S100a10/Pip5k1a/Tbck/Rap1gap/Arap2/Ezh2/Akt2/Ntrk3/Hras/Arhgef7/Adprhl1/Gnao1/Tbc1d2b/Bcr/Tbc1d30/Arhgef15/Rundc1/Tbc1d16/Rgs14/Ptk2b/Gsk3b/Tiam1/Tiam2/Tbc1d5/Arap3/Rasgrp2	34
GO:0016570	BP	GO:0016570	histone modification	53/1181	448/23328	8.8199e-09	4.62251e-05	2.0083e-06	Eya1/Per2/Hdac4/Cdc73/Mettl8/Ncoa6/Sfpq/Kmt2e/Mtf2/Setd1b/Auts2/Actl6b/Kdm7a/Ezh2/Prdm5/Kdm3a/Kdm5a/Prmt8/Prkcb/Mapk3/Kmt2a/Usp3/Setd2/Jade2/Ncor1/Per1/Mllt6/Ppp1r1b/Msl1/Hdac5/Jarid2/Phf2/Drd1/Phf20l1/Ep300/Kmt2d/Naa60/Crebbp/Ppm1f/Riox2/Paxbp1/Hlcs/Phf1/Brd4/Kdm3b/Rps6ka4/Jak2/Pcgf5/Slk/Tbl1x/Ogt/Nap1l2/Kdm5c	53
GO:0016569	BP	GO:0016569	covalent chromatin modification	54/1181	462/23328	9.73115e-09	5.1001e-05	2.02122e-06	Eya1/Per2/Hdac4/Cdc73/Mettl8/Ncoa6/Sfpq/Kmt2e/Mtf2/Setd1b/Auts2/Actl6b/Kdm7a/Ezh2/Prdm5/Kdm3a/Kdm5a/Prmt8/Prkcb/Mapk3/Kmt2a/Usp3/Setd2/Jade2/Ncor1/Per1/Mllt6/Ppp1r1b/Msl1/Hdac5/Jarid2/Phf2/Drd1/Phf20l1/Ep300/Kmt2d/Naa60/Crebbp/Ppm1f/Riox2/Paxbp1/Hlcs/Phf1/Brd4/Kdm3b/Mbd2/Rps6ka4/Jak2/Pcgf5/Slk/Tbl1x/Ogt/Nap1l2/Kdm5c	54
GO:0099175	BP	GO:0099175	regulation of postsynapse organization	25/1181	132/23328	1.01683e-08	5.32919e-05	2.02122e-06	Epha4/Ngef/Actr3/Zfp804a/Rapsn/Lzts3/Snx27/Musk/Ptprd/Ppp1r9a/Ptn/Grin2b/Shisa7/Arhgap33/Ntrk3/Camk2b/Baiap2/Dgkb/Numb/Shank3/Chmp2b/Tiam1/Sorbs1/Arhgef9/Pak3	25
GO:0048813	BP	GO:0048813	dendrite morphogenesis	30/1181	182/23328	1.0677e-08	5.59581e-05	2.02122e-06	Hecw2/Epha4/Dock10/Ngef/Actr3/Lzts3/Tnik/Dclk1/Ptprd/Sema3a/Ppp1r9a/Ptn/Arhgap33/Chrna7/Mef2a/Trak1/Syne1/Zfp365/Camk2b/Mink1/Baiap2/Kidins220/Numb/Rbfox2/Shank3/Gsk3b/Tiam1/Nedd4l/Myo5b/Pak3	30
GO:0034765	BP	GO:0034765	regulation of ion transmembrane transport	56/1181	489/23328	1.07454e-08	5.63168e-05	2.02122e-06	Hecw2/Per2/Cacna1e/Rgs7/Cacnb2/Scn3a/Kcna4/Kcnip3/Kcns1/Chrna4/Strit1/Snx27/Casq2/Pcsk9/Hpca/Slc9a1/Akap9/Slc26a5/Kcnip4/Tesc/Hvcn1/Kcnd2/Tcaf1/Kcna5/Kcna1/Akt2/Kcnj11/Abcc8/Cacng3/Gsg1l/Kcnu1/Neto2/Scn3b/Scn4b/Fxyd2/Drd2/Trpc1/Hcn2/Fgf11/Mink1/Actn2/Drd1/Kcnma1/Slmap/Ptk2b/Kcnq3/Shank3/Ano6/Shisa9/Pdpk1/Diaph1/Nedd4l/Ahnak/Kcnip2/Flna/Wnk3	56
GO:0010959	BP	GO:0010959	regulation of metal ion transport	51/1181	427/23328	1.22486e-08	6.41949e-05	2.20797e-06	Hecw2/Serpine2/Bcl2/Rgs7/Akt3/Cacnb2/Kcnip3/Kcns1/Strit1/Snx27/Casq2/Pcsk9/Hpca/Epb41/Oprd1/Slc9a1/Akap9/Kcnip4/Tesc/Itpr1/Cd4/Kcna5/Kcna1/Sptbn4/Akt2/Abcc8/Neto2/Gnao1/Scn3b/Scn4b/Fxyd2/Drd2/Trpc1/Adora2a/Per1/Fgf11/Mllt6/Actn2/Drd1/Slmap/Jph4/Ptk2b/Stc1/Ano6/Pdpk1/Diaph1/Nedd4l/Ahnak/Kcnip2/Flna/Wnk3	51
GO:0106027	BP	GO:0106027	neuron projection organization	22/1181	106/23328	1.34949e-08	7.07267e-05	2.33533e-06	Epha4/Dock10/Ngef/Actr3/Zfp804a/Map1a/Lzts3/Ppp1r9a/Grin2b/Arhgap33/Chrna7/Igf1r/Insr/Zfp365/Camk2b/Baiap2/Shank3/Abcd2/Gsk3b/Tiam1/Myo5b/Pak3	22
GO:0072659	BP	GO:0072659	protein localization to plasma membrane	40/1181	295/23328	1.41251e-08	7.40295e-05	2.35037e-06	Actr3/Cnst/Ppp2r5a/Cacnb2/Sec16a/Kcnip3/Tnik/Prkci/S100a10/Snx27/Pip5k1a/Kcnip4/Tesc/C2cd5/Sptbn4/Akt2/Kcnj11/Dchs1/Bbs2/Scn3b/Ptpn9/Golga4/Map7/Camk2b/Jup/Rab40b/Vti1b/Numb/Actn2/Ptch1/Fcho2/Rab3c/Slmap/Zdhhc23/Pdpk1/Rab26/Myo5b/Sorbs1/Flna/Wnk3	40
GO:0018209	BP	GO:0018209	peptidyl-serine modification	45/1181	357/23328	1.7465e-08	9.15339e-05	2.79848e-06	Sgk3/Clk1/Bcl2/Akt3/Nek6/Galnt13/Myo3b/Tlk1/Top1/Prkci/Dclk1/Fnip2/Hipk1/Clspn/Oprd1/Akap9/Cdc7/Lmtk2/Sptbn4/Akt2/Vrk3/Chrna7/Ntrk3/Prkcb/Sbk1/Mapk3/Inpp5f/Phip/Camkv/Inpp5j/Camk2b/Ppp1r1b/Drd1/Plk2/Dmtn/Ppm1f/Map3k13/Gsk3b/Pdpk1/Plcl2/Stk32a/Rps6ka4/Mark2/Prkx/Ogt	45
GO:0010976	BP	GO:0010976	positive regulation of neuron projection development	46/1181	372/23328	2.20006e-08	0.000115305	3.39934e-06	Epha4/Serpine2/Actr3/Syt2/Dab2ip/Zfp804a/Prkci/Skil/Ptprd/Ror1/Ppp1r9a/Ptn/Ezh2/Itpr1/Plxnd1/Ptpn5/Igf1r/Ntrk3/Unc13a/Golga4/Trak1/Fig4/Plk5/Camk2b/Baiap2/Kidins220/Numb/Ptk2b/Ep300/Shank3/Map3k13/Gsk3b/Tiam1/Pcp4/Tiam2/Srf/Ptk7/Ppp2r5d/Nedd4l/Dcc/Myo5b/Mark2/Neurl1a/L1cam/Flna/Pak3	46
GO:0071805	BP	GO:0071805	potassium ion transmembrane transport	31/1181	200/23328	2.70529e-08	0.000141784	4.03584e-06	Slc9a2/Rgs7/Kcnk2/Kcna4/Slc12a6/Kcnip3/Kcns1/Kcnn3/Snx27/Casq2/Slc24a2/Slc9a1/Akap9/Kcnip4/Kcnd2/Kcna5/Kcna1/Kcnj11/Abcc8/Kcnu1/Neto2/Hcn2/Kcnh4/Actn2/Kcnma1/Kcnq3/Ano6/Nedd4l/Kcnip2/Flna/Wnk3	31
GO:0043087	BP	GO:0043087	regulation of GTPase activity	40/1181	303/23328	3.00591e-08	0.00015754	4.33483e-06	Tbc1d8/Epha4/Dock10/Ngef/Rgs7/Dab2ip/Chn1/Ralgapa2/Tbc1d20/Ralgapb/S100a10/Pip5k1a/Tbck/Rap1gap/Cpeb2/Arap2/Dgki/Ezh2/Plxnd1/Akt2/Ntrk3/Hras/Arhgef7/Adprhl1/Gnao1/Tbc1d2b/Bcr/Tbc1d30/Arhgef15/Rundc1/Tbc1d16/Rgs14/Iqgap2/Ptk2b/Gsk3b/Tiam1/Tiam2/Tbc1d5/Arap3/Rasgrp2	40
GO:0032409	BP	GO:0032409	regulation of transporter activity	38/1181	280/23328	3.15393e-08	0.000165298	4.40158e-06	Hecw2/Bcl2/Cacnb2/Kcns1/Chrna4/Strit1/Snx27/Casq2/Cttnbp2nl/Pcsk9/Hpca/Slc9a1/Akap9/Tesc/Tcaf1/Kcna1/Kcnj11/Abcc8/Cacng3/Gsg1l/Insr/Neto2/Scn3b/Kmt2a/Scn4b/Fxyd2/Drd2/Fgf11/Mink1/Actn2/Slmap/Ptk2b/Ndfip2/Shank3/Shisa9/Nedd4l/Ahnak/Wnk3	38
GO:1905475	BP	GO:1905475	regulation of protein localization to membrane	30/1181	195/23328	5.36259e-08	0.000281053	7.25008e-06	Arpc2/Actr3/Cnst/Ppp2r5a/Tnik/Prkci/Snx27/Musk/Hpca/Ptn/Tcaf1/C2cd5/Shisa7/Akt2/Kcnj11/Hras/Ptpn9/Dag1/Camk2b/Vti1b/Numb/Dmtn/Shank3/Gsk3b/Pdpk1/Mtcl1/Myo5b/Sorbs1/Ogt/Wnk3	30
GO:0006813	BP	GO:0006813	potassium ion transport	34/1181	240/23328	5.7668e-08	0.000302238	7.5603e-06	Slc9a2/Rgs7/Kcnk2/Kcna4/Slc12a6/Kcnip3/Kcns1/Kcnn3/Snx27/Casq2/Slc24a2/Slc9a1/Akap9/Kcnip4/Kcnd2/Kcna5/Kcna1/Kcnj11/Abcc8/Kcnu1/Neto2/Fxyd2/Drd2/Hcn2/Kcnh4/Actn2/Kcnma1/Ptk2b/Kcnq3/Ano6/Nedd4l/Kcnip2/Flna/Wnk3	34
GO:0007264	BP	GO:0007264	small GTPase mediated signal transduction	50/1181	437/23328	6.76377e-08	0.000354489	8.60653e-06	Dock10/Ngef/Ralgps2/Dab2ip/Chn1/Ralgapa2/Ralgapb/Gpsm2/Arhgef39/Wasf2/Rap1gap/Ksr2/Auts2/Dgki/Arhgdib/Rerg/Sipa1l3/Arhgap33/Arhgef17/Hras/Arhgef7/Mcf2l/Dock6/Arhgap32/Usp28/Dennd4a/Arhgap18/Wasf1/Bcr/Srgap1/Obscn/Arhgef15/Git1/Baiap2/Dock4/Sos2/Ccdc88c/Ripor2/Dok3/Plk2/Spata13/Rhobtb2/Tiam1/Tiam2/Cdc42ep3/Arap3/Rasgrp2/Arl3/Arhgef9/Ogt	50
GO:0016358	BP	GO:0016358	dendrite development	39/1181	306/23328	1.15248e-07	0.000604017	1.42458e-05	Hecw2/Epha4/Dock10/Ngef/Actr3/Dab2ip/Map1a/Lzts3/Tnik/Dclk1/Ptprd/Sema3a/Uba6/Actl6b/Ppp1r9a/Ptn/Ezh2/Arhgap33/Chrna7/Mef2a/Trak1/Syne1/Zfp365/Camk2b/Mink1/Git1/Baiap2/Kidins220/Numb/Plk2/Klhl1/Rbfox2/Shank3/Gsk3b/Tiam1/Nedd4l/Myo5b/Neurl1a/Pak3	39
GO:0090630	BP	GO:0090630	activation of GTPase activity	19/1181	92/23328	1.41193e-07	0.000739994	1.6968e-05	Tbc1d8/Ngef/Ralgapa2/Ralgapb/Pip5k1a/Tbck/Akt2/Ntrk3/Adprhl1/Tbc1d2b/Bcr/Tbc1d30/Arhgef15/Rundc1/Tbc1d16/Ptk2b/Tiam1/Tiam2/Tbc1d5	19
GO:0002028	BP	GO:0002028	regulation of sodium ion transport	19/1181	93/23328	1.69108e-07	0.000886293	1.97733e-05	Hecw2/Serpine2/Akt3/Pcsk9/Slc9a1/Tesc/Sptbn4/Akt2/Neto2/Scn3b/Scn4b/Fxyd2/Drd2/Per1/Fgf11/Mllt6/Slmap/Nedd4l/Wnk3	19
GO:0046777	BP	GO:0046777	protein autophosphorylation	33/1181	241/23328	2.02793e-07	0.00106284	2.30881e-05	Clk1/Epha4/Ppp2r5a/Nek6/Myo3b/Tnik/Musk/Mob1b/Camkk2/Lmtk2/Igf1r/Mapk3/Insr/Peak1/Bcr/Irak3/Camk2b/Obscn/Mink1/Taok1/Mak/Ptk2b/Map3k13/Gsk3b/Brd4/Ppp2r5d/Mark2/Jak2/Slk/Grk5/Stk26/Prkx/Wnk3	33
GO:0001508	BP	GO:0001508	action potential	23/1181	138/23328	4.4144e-07	0.00231359	4.89695e-05	Cacnb2/Scn3a/Chrna4/Slc9a1/Kcnd2/Foxp1/Kcna5/Kcna1/Grin2b/Slc8a2/Ffar3/Chrna7/Ntrk3/Scn3b/Scn4b/Ctnna3/Jup/Cntnap1/Drd1/Kcnma1/Slmap/Nedd4l/Flna	23
GO:0097061	BP	GO:0097061	dendritic spine organization	19/1181	99/23328	4.72488e-07	0.00247631	5.0547e-05	Epha4/Dock10/Ngef/Actr3/Zfp804a/Lzts3/Ppp1r9a/Grin2b/Arhgap33/Chrna7/Igf1r/Insr/Zfp365/Camk2b/Baiap2/Shank3/Tiam1/Myo5b/Pak3	19
GO:1904062	BP	GO:1904062	regulation of cation transmembrane transport	42/1181	361/23328	4.79028e-07	0.00251059	5.0547e-05	Hecw2/Rgs7/Cacnb2/Kcnip3/Kcns1/Chrna4/Strit1/Snx27/Casq2/Pcsk9/Hpca/Slc9a1/Akap9/Kcnip4/Tesc/Kcna1/Kcnj11/Abcc8/Cacng3/Gsg1l/Neto2/Scn3b/Scn4b/Fxyd2/Drd2/Trpc1/Fgf11/Mink1/Actn2/Drd1/Slmap/Ptk2b/Shank3/Ano6/Shisa9/Pdpk1/Diaph1/Nedd4l/Ahnak/Kcnip2/Flna/Wnk3	42
GO:0007044	BP	GO:0007044	cell-substrate junction assembly	18/1181	90/23328	4.96379e-07	0.00260152	5.11307e-05	Bcl2/Lamc1/S100a10/Pip5k1a/Limch1/Peak1/Bcr/Actn1/Actn2/Vcl/Ptk2b/Dmtn/Acvrl1/Itga5/Ppm1f/Pdpk1/Sorbs1/Slk	18
GO:0010769	BP	GO:0010769	regulation of cell morphogenesis involved in differentiation	41/1181	351/23328	5.88416e-07	0.00308389	5.92017e-05	Hecw2/Arpc2/Epha4/Ngef/Actr3/Chn1/Lzts3/Tnik/Skil/S100a10/Ptprd/Zswim5/Sema3a/Ppp1r9a/Plxnd1/Arhgap33/Ntrk3/Zswim4/Golga4/Trak1/Syne1/Ust/Camk2b/Baiap2/Numb/Rreb1/Dmtn/Ep300/Shank3/Map3k13/Gsk3b/Tiam1/Tiam2/Srf/Sema6a/Nedd4l/Myo5b/Mark2/L1cam/Flna/Pak3	41
GO:1903829	BP	GO:1903829	positive regulation of cellular protein localization	38/1181	317/23328	7.94808e-07	0.00416559	7.81498e-05	Arpc2/Actr3/Cnst/Sec16a/Map1a/Prkci/Snx27/Gpsm2/Musk/Hpca/Epb41/Sfn/Crocc/Ptn/Tcaf1/C2cd5/Akt2/Kcnj11/Ptpn5/Hras/Cyld/Sorl1/Ptpn9/Epb41l2/Jup/Pinx1/Ep300/Gsk3b/Pdpk1/Hnrnpm/Mtcl1/Myo5b/Chrm1/Jak2/Sorbs1/Flna/Ogt/Wnk3	38
GO:0150115	BP	GO:0150115	NA	18/1181	93/23328	8.26055e-07	0.00432935	7.94172e-05	Bcl2/Lamc1/S100a10/Pip5k1a/Limch1/Peak1/Bcr/Actn1/Actn2/Vcl/Ptk2b/Dmtn/Acvrl1/Itga5/Ppm1f/Pdpk1/Sorbs1/Slk	18
GO:0022898	BP	GO:0022898	regulation of transmembrane transporter activity	34/1181	270/23328	9.72207e-07	0.00509534	8.95826e-05	Hecw2/Bcl2/Cacnb2/Kcns1/Chrna4/Strit1/Snx27/Casq2/Pcsk9/Hpca/Slc9a1/Akap9/Tesc/Tcaf1/Kcna1/Kcnj11/Abcc8/Cacng3/Gsg1l/Neto2/Scn3b/Scn4b/Fxyd2/Drd2/Fgf11/Mink1/Actn2/Slmap/Ptk2b/Shank3/Shisa9/Nedd4l/Ahnak/Wnk3	34
GO:0006814	BP	GO:0006814	sodium ion transport	31/1181	234/23328	9.73203e-07	0.00510056	8.95826e-05	Slc9a2/Hecw2/Asic4/Serpine2/Akt3/Scn3a/Slc4a11/Slc9b2/Slc24a2/Pcsk9/Slc9a1/Slc4a4/Tesc/Slc6a6/Slc8a2/Sptbn4/Akt2/Neto2/Scn3b/Scn4b/Fxyd2/Drd2/Hcn2/Slc17a8/Per1/Fgf11/Mllt6/Slmap/Ano6/Nedd4l/Wnk3	31
GO:0032412	BP	GO:0032412	regulation of ion transmembrane transporter activity	33/1181	259/23328	1.07269e-06	0.00562194	9.66828e-05	Hecw2/Cacnb2/Kcns1/Chrna4/Strit1/Snx27/Casq2/Pcsk9/Hpca/Slc9a1/Akap9/Tesc/Tcaf1/Kcna1/Kcnj11/Abcc8/Cacng3/Gsg1l/Neto2/Scn3b/Scn4b/Fxyd2/Drd2/Fgf11/Mink1/Actn2/Slmap/Ptk2b/Shank3/Shisa9/Nedd4l/Ahnak/Wnk3	33
GO:0099159	BP	GO:0099159	regulation of modification of postsynaptic structure	7/1181	13/23328	1.09801e-06	0.00575465	9.69453e-05	Cttnbp2/Camkv/Baiap2/Gsk3b/Chmp2b/Tiam1/Myo5b	7
GO:1905244	BP	GO:1905244	regulation of modification of synaptic structure	8/1181	18/23328	1.16976e-06	0.00613072	0.000101215	Epha4/Cttnbp2/Camkv/Baiap2/Gsk3b/Chmp2b/Tiam1/Myo5b	8
GO:0048168	BP	GO:0048168	regulation of neuronal synaptic plasticity	15/1181	69/23328	1.44966e-06	0.00759765	0.000122974	Ncdn/Grin2b/Shisa7/Slc8a2/Hras/Unc13a/Kmt2a/Drd2/Camk2b/Drd1/Shank3/Shisa9/Gsk3b/Egr1/Neurl1a	15
GO:0007613	BP	GO:0007613	memory	23/1181	149/23328	1.76057e-06	0.00922715	0.000146477	Map1a/Hrh3/Cyp7b1/Musk/Slc24a2/Ptn/Ccnd2/Grin2b/Shisa7/Slc8a2/Abcc8/Chrna7/Drd2/Ppp1r1b/Atxn1/Drd1/Rgs14/Plk2/Shank3/Itga5/Srf/Egr1/Rin1	23
GO:0043266	BP	GO:0043266	regulation of potassium ion transport	19/1181	108/23328	1.88669e-06	0.00988812	0.000154008	Rgs7/Kcnip3/Kcns1/Snx27/Casq2/Akap9/Kcnip4/Kcna5/Kcna1/Abcc8/Neto2/Drd2/Actn2/Ptk2b/Ano6/Nedd4l/Kcnip2/Flna/Wnk3	19
GO:0098984	CC	GO:0098984	neuron to neuron synapse	67/1184	433/23271	3.37564e-16	1.96125e-13	1.5066e-13	Epha4/Kcna4/Map1a/Lzts3/Flrt3/Epb41l1/Dclk1/Snx27/Penk/Ptprd/Epb41/Oprd1/Akap9/Add1/Ppp1r9a/Kcnd2/Dgki/Itpr1/Grin2b/Ptpro/Shisa7/Slc8a2/Grik5/Chrna7/Dlg2/Syt9/Cacng3/Gsg1l/Dnajb1/Adgrl1/Neto2/Arhgap32/Nrgn/Drd2/Grm1/Bcr/Adora2a/Anks1b/Slc16a7/Camk2b/Baiap2/Numb/Actn2/Cap2/Rgs14/Ptch1/Rgs7bp/Erc2/Ptk2b/Dmtn/Drosha/Mal2/Shank3/Shisa9/Gsk3b/Chmp2b/Tiam1/Pdpk1/Pura/Dcc/Chrm1/Slc1a1/Neurl1a/Gria3/Arhg…	67
GO:0032279	CC	GO:0032279	asymmetric synapse	63/1184	405/23271	2.04049e-15	1.18552e-12	4.55351e-13	Epha4/Kcna4/Map1a/Lzts3/Flrt3/Epb41l1/Dclk1/Snx27/Epb41/Oprd1/Akap9/Add1/Ppp1r9a/Kcnd2/Dgki/Itpr1/Grin2b/Ptpro/Shisa7/Slc8a2/Grik5/Chrna7/Dlg2/Cacng3/Gsg1l/Dnajb1/Adgrl1/Neto2/Arhgap32/Nrgn/Drd2/Grm1/Bcr/Adora2a/Anks1b/Slc16a7/Camk2b/Baiap2/Numb/Actn2/Cap2/Rgs14/Ptch1/Rgs7bp/Erc2/Ptk2b/Dmtn/Drosha/Shank3/Shisa9/Gsk3b/Chmp2b/Tiam1/Pdpk1/Pura/Dcc/Chrm1/Slc1a1/Neurl1a/Gria3/Arhgef9/Drp2/Pak3	63
GO:0099572	CC	GO:0099572	postsynaptic specialization	65/1184	439/23271	8.28357e-15	4.81275e-12	1.23236e-12	Epha4/Rapsn/Map1a/Lzts3/Flrt3/Epb41l1/Chrna4/Dclk1/Snx27/Epb41/Oprd1/Akap9/Add1/Gabra4/Ppp1r9a/Kcnd2/Dgki/Itpr1/Grin2b/Ptpro/Shisa7/Slc8a2/Grik5/Chrna7/Dlg2/Cacng3/Gsg1l/Dlgap2/Dnajb1/Adgrl1/Neto2/Arhgap32/Nrgn/Drd2/Grm1/Bcr/Adora2a/Anks1b/Slc16a7/Camk2b/Baiap2/Numb/Actn2/Cap2/Rgs14/Ptch1/Rgs7bp/Erc2/Ptk2b/Dmtn/Drosha/Shank3/Shisa9/Gsk3b/Chmp2b/Tiam1/Pdpk1/Pura/Dcc/Chrm1/Neurl1a/Gria3/Arhgef9/Drp…	65
GO:0014069	CC	GO:0014069	postsynaptic density	61/1184	400/23271	1.44842e-14	8.41534e-12	1.61614e-12	Epha4/Map1a/Lzts3/Flrt3/Epb41l1/Dclk1/Snx27/Epb41/Oprd1/Akap9/Add1/Ppp1r9a/Kcnd2/Dgki/Itpr1/Grin2b/Ptpro/Shisa7/Slc8a2/Grik5/Chrna7/Dlg2/Cacng3/Gsg1l/Dnajb1/Adgrl1/Neto2/Arhgap32/Nrgn/Drd2/Grm1/Bcr/Adora2a/Anks1b/Slc16a7/Camk2b/Baiap2/Numb/Actn2/Cap2/Rgs14/Ptch1/Rgs7bp/Erc2/Ptk2b/Dmtn/Drosha/Shank3/Shisa9/Gsk3b/Chmp2b/Tiam1/Pdpk1/Pura/Dcc/Chrm1/Neurl1a/Gria3/Arhgef9/Drp2/Pak3	61
GO:0097060	CC	GO:0097060	synaptic membrane	67/1184	470/23271	2.0836e-14	1.21057e-11	1.85989e-12	Epha4/Cacna1e/Rgs7/Rapsn/Kcna4/Flrt3/Epb41l1/Chrna4/Nbea/Musk/Ptprd/Oprd1/Usp48/Gabrd/Akap9/Gabra4/Hip1/Kcnd2/Dgki/Slc6a6/Itpr1/Kcna1/Grin2b/Ptpro/Shisa7/Slc8a2/Grik5/Ptpn5/Chrna7/Ntrk3/Dlg2/Pde2a/Cacng3/Gsg1l/Unc13a/Adgrl1/Cdh8/Nrgn/Drd2/Htr1b/Nt5e/Dag1/Syne1/Grm1/Adora2a/Lin7a/Slc16a7/Akap1/Cntnap1/Baiap2/Actn2/Drd1/Fcho2/Rgs7bp/Kcnma1/Erc2/Kctd12/Shank3/Ddn/Shisa9/Tiam1/Kctd16/Dcc/Chrm1/Gria3/…	67
GO:0043197	CC	GO:0043197	dendritic spine	40/1184	195/23271	3.10499e-14	1.804e-11	2.30968e-12	Arpc2/Epha4/Dock10/Zfp804a/Kcna4/Lzts3/Hpca/Oprd1/Add1/Ppp1r9a/Kcnd2/Dgki/Grin2b/Ptpro/Slc8a2/Arhgap33/Chrna7/Dlgap2/Dnajb1/Nrgn/Drd2/Syne1/Grm1/Ppp1r1b/Nr1d1/Baiap2/Prkar2b/Actn1/Drd1/Rgs14/Rgs7bp/Ptk2b/Shank3/Gsk3b/Tiam1/Myo5b/Ppp1ca/Slc1a1/Neurl1a/Gria3	40
GO:0044309	CC	GO:0044309	neuron spine	40/1184	200/23271	7.50121e-14	4.35821e-11	4.78273e-12	Arpc2/Epha4/Dock10/Zfp804a/Kcna4/Lzts3/Hpca/Oprd1/Add1/Ppp1r9a/Kcnd2/Dgki/Grin2b/Ptpro/Slc8a2/Arhgap33/Chrna7/Dlgap2/Dnajb1/Nrgn/Drd2/Syne1/Grm1/Ppp1r1b/Nr1d1/Baiap2/Prkar2b/Actn1/Drd1/Rgs14/Rgs7bp/Ptk2b/Shank3/Gsk3b/Tiam1/Myo5b/Ppp1ca/Slc1a1/Neurl1a/Gria3	40
GO:0045211	CC	GO:0045211	postsynaptic membrane	52/1184	330/23271	3.5355e-13	2.05413e-10	1.97244e-11	Epha4/Cacna1e/Rgs7/Rapsn/Kcna4/Flrt3/Chrna4/Nbea/Musk/Oprd1/Usp48/Gabrd/Akap9/Gabra4/Hip1/Kcnd2/Dgki/Slc6a6/Kcna1/Grin2b/Ptpro/Shisa7/Slc8a2/Grik5/Chrna7/Ntrk3/Dlg2/Cacng3/Gsg1l/Nrgn/Drd2/Dag1/Syne1/Grm1/Adora2a/Lin7a/Slc16a7/Akap1/Actn2/Drd1/Rgs7bp/Kcnma1/Kctd12/Shank3/Ddn/Shisa9/Tiam1/Kctd16/Dcc/Chrm1/Gria3/Slitrk2	52
GO:0098936	CC	GO:0098936	intrinsic component of postsynaptic membrane	32/1184	178/23271	4.15672e-10	2.41505e-07	2.06134e-08	Epha4/Cacna1e/Kcna4/Flrt3/Chrna4/Oprd1/Gabrd/Gabra4/Kcnd2/Slc6a6/Kcna1/Grin2b/Ptpro/Shisa7/Slc8a2/Grik5/Chrna7/Ntrk3/Dlg2/Cacng3/Gsg1l/Drd2/Grm1/Adora2a/Slc16a7/Drd1/Rgs7bp/Shisa9/Dcc/Chrm1/Gria3/Slitrk2	32
GO:0099055	CC	GO:0099055	integral component of postsynaptic membrane	30/1184	169/23271	1.98801e-09	1.15503e-06	8.8728e-08	Epha4/Cacna1e/Kcna4/Flrt3/Chrna4/Oprd1/Gabrd/Gabra4/Kcnd2/Slc6a6/Kcna1/Grin2b/Ptpro/Shisa7/Slc8a2/Grik5/Chrna7/Ntrk3/Cacng3/Gsg1l/Drd2/Grm1/Adora2a/Slc16a7/Drd1/Shisa9/Dcc/Chrm1/Gria3/Slitrk2	30
GO:0099240	CC	GO:0099240	intrinsic component of synaptic membrane	36/1184	244/23271	9.12666e-09	5.30259e-06	3.70307e-07	Epha4/Cacna1e/Kcna4/Flrt3/Chrna4/Ptprd/Oprd1/Gabrd/Gabra4/Kcnd2/Slc6a6/Kcna1/Grin2b/Ptpro/Shisa7/Slc8a2/Grik5/Chrna7/Ntrk3/Dlg2/Cacng3/Gsg1l/Adgrl1/Drd2/Htr1b/Grm1/Adora2a/Slc16a7/Drd1/Rgs7bp/Kcnma1/Shisa9/Dcc/Chrm1/Gria3/Slitrk2	36
GO:0099699	CC	GO:0099699	integral component of synaptic membrane	34/1184	226/23271	1.42531e-08	8.28103e-06	5.30114e-07	Epha4/Cacna1e/Kcna4/Flrt3/Chrna4/Ptprd/Oprd1/Gabrd/Gabra4/Kcnd2/Slc6a6/Kcna1/Grin2b/Ptpro/Shisa7/Slc8a2/Grik5/Chrna7/Ntrk3/Cacng3/Gsg1l/Adgrl1/Drd2/Htr1b/Grm1/Adora2a/Slc16a7/Drd1/Kcnma1/Shisa9/Dcc/Chrm1/Gria3/Slitrk2	34
GO:0034702	CC	GO:0034702	ion channel complex	40/1184	296/23271	1.7816e-08	1.03511e-05	6.11658e-07	Cacna1e/Kcnk2/Cacnb2/Scn3a/Kcna4/Ryr3/Kcnip3/Kcns1/Chrna4/Mcub/Gabrd/Kcnip4/Gabra4/Lrrc8b/Lrrc8c/Lrrc8d/Kcnd2/Ano2/Kcna5/Kcna1/Grin2b/Grik5/Ryr1/Kcnj11/Abcc8/Chrna7/Dlg2/Cacng3/Scn3b/Scn4b/Trpc1/Hcn2/Kcnma1/Ptk2b/Kcnq3/Shank3/Ano6/Shisa9/Kcnip2/Gria3	40
GO:0150034	CC	GO:0150034	distal axon	47/1184	384/23271	2.48247e-08	1.44232e-05	7.87925e-07	Arpc2/Epha4/Kcnk2/Zfp804a/Kcnip3/Lamp5/Flrt3/Penk/C9orf72/Ror1/Oprd1/Auts2/Lmtk2/Ppp1r9a/Dgki/Kcna1/Grin2b/Slc8a2/Grik5/Chrna7/Prkcb/Arhgef7/Unc13a/Adgrl1/Cdh8/Drd2/Htr1b/Trak1/Slc17a8/Inpp5j/Git1/Pnmt/Hdac5/Drd1/Ptch1/Kcnma1/Erc2/Ptk2b/Gsk3b/Tiam1/Dcc/Chrm1/Slc1a1/Elk1/Gria3/L1cam/Flna	47
GO:1902495	CC	GO:1902495	transmembrane transporter complex	41/1184	312/23271	2.6481e-08	1.53854e-05	7.87925e-07	Cacna1e/Kcnk2/Cacnb2/Scn3a/Kcna4/Ryr3/Kcnip3/Kcns1/Chrna4/Mcub/Slc9a1/Gabrd/Kcnip4/Gabra4/Lrrc8b/Lrrc8c/Lrrc8d/Kcnd2/Ano2/Kcna5/Kcna1/Grin2b/Grik5/Ryr1/Kcnj11/Abcc8/Chrna7/Dlg2/Cacng3/Scn3b/Scn4b/Trpc1/Hcn2/Kcnma1/Ptk2b/Kcnq3/Shank3/Ano6/Shisa9/Kcnip2/Gria3	41
GO:0043198	CC	GO:0043198	dendritic shaft	17/1184	69/23271	4.42789e-08	2.5726e-05	1.23515e-06	Arpc2/Epha4/Zfp804a/Kcna4/Map1a/Chrna7/Hcn2/Inpp5j/Baiap2/Prkar2b/Drd1/Rgs7bp/Jph4/Gsk3b/Slc1a1/Gria3/Flna	17
GO:1990351	CC	GO:1990351	transporter complex	41/1184	319/23271	4.9635e-08	2.88379e-05	1.30311e-06	Cacna1e/Kcnk2/Cacnb2/Scn3a/Kcna4/Ryr3/Kcnip3/Kcns1/Chrna4/Mcub/Slc9a1/Gabrd/Kcnip4/Gabra4/Lrrc8b/Lrrc8c/Lrrc8d/Kcnd2/Ano2/Kcna5/Kcna1/Grin2b/Grik5/Ryr1/Kcnj11/Abcc8/Chrna7/Dlg2/Cacng3/Scn3b/Scn4b/Trpc1/Hcn2/Kcnma1/Ptk2b/Kcnq3/Shank3/Ano6/Shisa9/Kcnip2/Gria3	41
GO:0042734	CC	GO:0042734	presynaptic membrane	30/1184	198/23271	8.473e-08	4.92281e-05	2.10091e-06	Epha4/Cacna1e/Kcna4/Chrna4/Ptprd/Oprd1/Hip1/Dgki/Kcna1/Grin2b/Grik5/Chrna7/Pde2a/Unc13a/Adgrl1/Drd2/Htr1b/Grm1/Adora2a/Cntnap1/Drd1/Fcho2/Rgs7bp/Kcnma1/Erc2/Kctd12/Kctd16/Chrm1/Gria3/L1cam	30
GO:0099634	CC	GO:0099634	postsynaptic specialization membrane	24/1184	136/23271	9.00983e-08	5.23471e-05	2.11644e-06	Rapsn/Chrna4/Oprd1/Akap9/Gabra4/Kcnd2/Dgki/Grin2b/Ptpro/Shisa7/Grik5/Chrna7/Dlg2/Cacng3/Gsg1l/Grm1/Slc16a7/Actn2/Rgs7bp/Shisa9/Tiam1/Dcc/Chrm1/Gria3	24
GO:0044306	CC	GO:0044306	neuron projection terminus	31/1184	213/23271	1.32026e-07	7.67069e-05	2.84574e-06	Arpc2/Epha4/Kcnk2/Kcnip3/Flrt3/Penk/Ror1/Oprd1/Dgki/Kcna1/Grin2b/Slc8a2/Grik5/Prkcb/Unc13a/Cdh8/Drd2/Ptpn9/Htr1b/Slc17a8/Git1/Pnmt/Baiap2/Drd1/Kcnma1/Erc2/Chrm1/Slc1a1/Elk1/Gria3/L1cam	31
GO:0015629	CC	GO:0015629	actin cytoskeleton	54/1184	497/23271	1.33897e-07	7.77943e-05	2.84574e-06	Arpc2/Hdac4/Actr3/Arhgap21/Myo3b/Myh7b/Cttnbp2nl/Synpo2/Nexn/Tpm2/Ror1/Cap1/Epb41/Crocc/Fblim1/Abcb4/Add1/Ablim2/Limch1/Auts2/Ppp1r9a/Cttnbp2/Wipf3/Sptbn4/Sipa1l3/Tlnrd1/Prkcb/Arhgap32/Peak1/Tpm1/Vill/Ackr2/Epb41l2/Ppp1r12a/Gas7/Myo1d/Wipf2/Jup/Baiap2/Actn1/Actn2/Cap2/Vcl/Dmtn/Dgkh/Cdc42ep3/Svil/Onecut2/Myo5b/Ehbp1l1/Mark2/Ahnak/Sorbs1/Flna	54
GO:0043679	CC	GO:0043679	axon terminus	29/1184	192/23271	1.48368e-07	8.62018e-05	3.00995e-06	Arpc2/Epha4/Kcnk2/Kcnip3/Flrt3/Penk/Ror1/Oprd1/Dgki/Kcna1/Grin2b/Slc8a2/Grik5/Prkcb/Unc13a/Cdh8/Drd2/Htr1b/Slc17a8/Git1/Pnmt/Drd1/Kcnma1/Erc2/Chrm1/Slc1a1/Elk1/Gria3/L1cam	29
GO:0043204	CC	GO:0043204	perikaryon	23/1184	140/23271	6.26136e-07	0.000363785	1.21502e-05	Arpc2/Epha4/Cacna1e/Ckmt1/Top1/Penk/C9orf72/Ncdn/Hpca/Grik5/Ptpn5/Drd2/Cyp11a1/Slc17a8/Camk2b/Pnmt/Rgs7bp/Pde10a/Pdpk1/Ppp1ca/Slc1a1/Neurl1a/Gria3	23
GO:0034703	CC	GO:0034703	cation channel complex	30/1184	222/23271	1.05264e-06	0.000611586	1.95755e-05	Cacna1e/Kcnk2/Cacnb2/Scn3a/Kcna4/Ryr3/Kcnip3/Kcns1/Mcub/Kcnip4/Kcnd2/Kcna5/Kcna1/Grin2b/Grik5/Ryr1/Kcnj11/Abcc8/Dlg2/Cacng3/Scn3b/Scn4b/Trpc1/Hcn2/Kcnma1/Ptk2b/Kcnq3/Shisa9/Kcnip2/Gria3	30
GO:0030016	CC	GO:0030016	myofibril	29/1184	212/23271	1.23079e-06	0.000715088	2.19728e-05	Hdac4/Ppp2r5a/Nebl/Ryr3/Myh7b/Casq2/Synpo2/Nexn/Tpm2/Ablim2/Kcna5/Grin2b/Ryr1/Scn3b/Tpm1/Trpc1/Dag1/Syne1/Ppp1r12a/Obscn/Jup/Actn1/Actn2/Ppp3cb/Vcl/Fbxo32/Svil/Ahnak/Flna	29
GO:0098839	CC	GO:0098839	postsynaptic density membrane	18/1184	97/23271	1.68741e-06	0.000980383	2.8966e-05	Oprd1/Akap9/Dgki/Grin2b/Ptpro/Grik5/Dlg2/Cacng3/Gsg1l/Grm1/Slc16a7/Actn2/Rgs7bp/Shisa9/Tiam1/Dcc/Chrm1/Gria3	18
GO:0031252	CC	GO:0031252	cell leading edge	43/1184	395/23271	2.37437e-06	0.00137951	3.92489e-05	Arpc2/Actr3/Lamp5/Prkci/Pip5k1a/Hpca/Oprd1/Wasf2/Gabra4/Tesc/Ppp1r9a/Plxnd1/C2cd5/Shisa7/Akt2/Kcnj11/Chrna7/Insr/Arhgef7/Mcf2l/Tln2/Dag1/Arhgap18/Wasf1/Ctnna3/Adora2a/Hcn2/Inpp5j/Gas7/Myo1d/Actn1/Ripor2/Iqgap2/Spata13/Ptk2b/Itga5/Shisa9/Acap2/Tiam1/Jcad/Diaph1/Arap3/Slk	43
GO:0098948	CC	GO:0098948	intrinsic component of postsynaptic specialization membrane	19/1184	111/23271	3.10183e-06	0.00180217	4.94428e-05	Chrna4/Oprd1/Gabra4/Kcnd2/Grin2b/Ptpro/Shisa7/Grik5/Chrna7/Dlg2/Cacng3/Gsg1l/Grm1/Slc16a7/Rgs7bp/Shisa9/Dcc/Chrm1/Gria3	19
GO:0043292	CC	GO:0043292	contractile fiber	29/1184	226/23271	4.51809e-06	0.00262501	6.95344e-05	Hdac4/Ppp2r5a/Nebl/Ryr3/Myh7b/Casq2/Synpo2/Nexn/Tpm2/Ablim2/Kcna5/Grin2b/Ryr1/Scn3b/Tpm1/Trpc1/Dag1/Syne1/Ppp1r12a/Obscn/Jup/Actn1/Actn2/Ppp3cb/Vcl/Fbxo32/Svil/Ahnak/Flna	29
GO:0030018	CC	GO:0030018	Z disc	20/1184	125/23271	5.03668e-06	0.00292631	7.49317e-05	Hdac4/Ppp2r5a/Nebl/Ryr3/Casq2/Synpo2/Nexn/Kcna5/Grin2b/Ryr1/Scn3b/Ppp1r12a/Obscn/Jup/Actn1/Actn2/Ppp3cb/Vcl/Fbxo32/Flna	20
GO:0097440	CC	GO:0097440	apical dendrite	9/1184	28/23271	6.35725e-06	0.00369356	9.15271e-05	Arpc2/Grin2b/Slc17a8/Osbp2/Myo1d/Ptk2b/Slc1a1/Neurl1a/Flna	9
GO:0005925	CC	GO:0005925	focal adhesion	23/1184	161/23271	7.30576e-06	0.00424465	0.00010086	Arpc2/Flrt3/Synpo2/Nexn/Focad/Fblim1/Abcb4/Mtf2/Mapk3/Arhgef7/Peak1/Tln2/Dag1/Git1/Grb7/Actn1/Actn2/Vcl/Ptk2b/Itgbl1/Itga5/Jak2/Sorbs1	23
GO:0031256	CC	GO:0031256	leading edge membrane	22/1184	150/23271	7.45743e-06	0.00433277	0.00010086	Arpc2/Lamp5/Pip5k1a/Hpca/Oprd1/Gabra4/C2cd5/Shisa7/Akt2/Kcnj11/Chrna7/Insr/Adora2a/Hcn2/Myo1d/Ripor2/Spata13/Itga5/Shisa9/Tiam1/Jcad/Diaph1	22
GO:0030055	CC	GO:0030055	cell-substrate junction	24/1184	174/23271	8.60402e-06	0.00499893	0.000112944	Arpc2/Actr3/Flrt3/Synpo2/Nexn/Focad/Fblim1/Abcb4/Mtf2/Mapk3/Arhgef7/Peak1/Tln2/Dag1/Git1/Grb7/Actn1/Actn2/Vcl/Ptk2b/Itgbl1/Itga5/Jak2/Sorbs1	24
GO:0034705	CC	GO:0034705	potassium channel complex	16/1184	90/23271	1.11471e-05	0.00647646	0.000142146	Kcnk2/Kcna4/Kcnip3/Kcns1/Kcnip4/Kcnd2/Kcna5/Kcna1/Grik5/Kcnj11/Abcc8/Dlg2/Hcn2/Kcnma1/Kcnq3/Kcnip2	16
GO:0098685	CC	GO:0098685	Schaffer collateral - CA1 synapse	18/1184	113/23271	1.56997e-05	0.00912154	0.00019464	Epha4/Prkci/Ptprd/Dgki/Itpr1/Cacng3/Gsg1l/Grm1/Bcr/Anks1b/Slc16a7/Baiap2/Dgkb/Gsk3b/Dcc/Myo5b/Chrm1/L1cam	18
GO:0030695	MF	GO:0030695	GTPase regulator activity	44/1192	258/22669	4.43658e-12	4.12158e-09	3.30175e-09	Rgs20/Tbc1d8/Rgs7/Arhgap21/Dab2ip/Chn1/Ralgapa2/Tbc1d20/Ralgapb/Gpsm2/Tbck/Rap1gap/Krit1/Cpeb2/Arap2/Agfg2/Dgki/Arhgdib/Sipa1l3/Arhgap33/Adprhl1/Arhgap10/Arhgap32/Arhgap20/Tbc1d2b/Arhgap18/Ranbp2/Bcr/Ric8b/Tbc1d30/Srgap1/Arhgef15/Git1/Rundc1/Tbc1d16/Dock4/Rgs14/Iqgap2/Acap2/Tiam2/Rgs11/Tbc1d5/Arap3/Rin1	44
GO:0060589	MF	GO:0060589	nucleoside-triphosphatase regulator activity	47/1192	298/22669	1.44687e-11	1.34414e-08	5.38387e-09	Rgs20/Tbc1d8/Rgs7/Arhgap21/Dab2ip/Chn1/Ralgapa2/Tbc1d20/Ralgapb/Fnip2/Gpsm2/Tbck/Rap1gap/Krit1/Cpeb2/Arap2/Agfg2/Hsph1/Dgki/Arhgdib/Sipa1l3/Arhgap33/Adprhl1/Arhgap10/Dnajb1/Arhgap32/Arhgap20/Tbc1d2b/Arhgap18/Ranbp2/Bcr/Ric8b/Tbc1d30/Srgap1/Arhgef15/Git1/Rundc1/Tbc1d16/Dock4/Rgs14/Iqgap2/Acap2/Tiam2/Rgs11/Tbc1d5/Arap3/Rin1	47
GO:0005096	MF	GO:0005096	GTPase activator activity	40/1192	238/22669	6.61215e-11	6.14269e-08	1.64028e-08	Rgs20/Tbc1d8/Rgs7/Arhgap21/Dab2ip/Chn1/Ralgapa2/Tbc1d20/Ralgapb/Tbck/Rap1gap/Arap2/Agfg2/Arhgdib/Sipa1l3/Arhgap33/Adprhl1/Arhgap10/Arhgap32/Arhgap20/Tbc1d2b/Arhgap18/Ranbp2/Bcr/Ric8b/Tbc1d30/Srgap1/Arhgef15/Git1/Rundc1/Tbc1d16/Dock4/Rgs14/Iqgap2/Acap2/Tiam2/Rgs11/Tbc1d5/Arap3/Rin1	40
GO:0003779	MF	GO:0003779	actin binding	57/1192	434/22669	1.84322e-10	1.71235e-07	3.42936e-08	Arpc2/Actr3/Cacnb2/Nebl/Myo3b/Ino80/Sptbn5/Map1a/Myh7b/Epb41l1/Phactr3/Synpo2/Nexn/Tpm2/Cap1/Hpca/Epb41/Wasf2/Crocc/Add1/Ablim2/Limch1/Hip1/Ppp1r9a/Wipf3/Sptbn4/Tlnrd1/Nod2/Tpm1/Tln2/Dag1/Vill/Syne1/Epb41l2/Wasf1/Ctnna3/Gas7/Myo1d/Wipf2/Fmnl1/Sntg2/Actn1/Actn2/Cap2/Iqgap2/Vcl/Kcnma1/Dmtn/Klhl1/Mrtfa/Shank3/Daam2/Svil/Diaph1/Myo5b/Flna/Diaph2	57
GO:0004674	MF	GO:0004674	protein serine/threonine kinase activity	57/1192	439/22669	2.87312e-10	2.66913e-07	4.27641e-08	Sgk3/Clk1/Akt3/Nek6/Acvr1c/Acvr1/Myo3b/Tlk1/Top1/Tnik/Prkci/Dclk1/Hipk1/Cdc7/Ksr2/Camkk2/Lmtk2/Cdk8/Akt2/Vrk3/Lmtk3/Prkcb/Sbk1/Mapk3/Sik3/Ankk1/Camkv/Bcr/Cdk17/Irak3/Camk2b/Obscn/Mink1/Camkk1/Taok1/Map2k6/Ccnk/Cdk13/Mak/Plk2/Ptk2b/Acvrl1/Map3k13/Gsk3b/Pdpk1/Srpk1/Brd4/Stk32a/Rps6ka4/Mark2/Slk/Grk5/Stk26/Prkx/Pak3/Wnk3/Rps6ka3	57
GO:0031267	MF	GO:0031267	small GTPase binding	54/1192	424/22669	1.70821e-09	1.58693e-06	2.11878e-07	Tbc1d8/Dock10/Ngef/Tbc1d20/Sike1/Tbck/C9orf72/Arhgef39/Yipf1/Rap1gap/Dgki/Arhgdib/Arhgef17/Arhgef7/Mcf2l/Adprhl1/Sorl1/Exph5/Dennd4a/Tbc1d2b/Wasf1/Ranbp2/Bcr/Tbc1d30/Srgap1/Ranbp17/Obscn/Arhgef15/Git1/Rundc1/Fmnl1/Tbc1d16/Dock4/Sos2/Iqgap2/Vcl/Dennd6a/Spata13/Acap2/Tiam1/Tiam2/Rab11fip3/Daam2/Tbc1d5/Cdc42ep3/Diaph1/Myo5b/Rin1/Sytl5/Wdr44/Flna/Arhgef9/Diaph2/Pak3	54
GO:0042578	MF	GO:0042578	phosphoric ester hydrolase activity	48/1192	357/22669	2.32905e-09	2.16369e-06	2.47615e-07	Eya1/Sgpp2/Ptpn7/Ppp2r5a/Pfkfb3/Sec16a/Gpcpd1/Samhd1/Noct/Pdp1/Rngtt/Plppr1/Ptprd/Smpdl3b/Plch2/Ppp1cb/Ppef2/Plcxd1/Pptc7/Ppm1k/Dusp11/Ptpro/Ptpn5/Gdpd5/Pde2a/Inpp5f/Lhpp/Ptpre/Smpd3/Ptpn9/Nt5e/Ctdspl/Fig4/Ppp1r12a/Ctdsp2/Inpp5j/Ctdnep1/Ppm1d/Nt5c3b/Ppp3cb/Ppm1f/Pde10a/Dusp1/Ppp2r5d/Plcl2/Ppp1ca/Plpp6/Fra10ac1	48
GO:0017016	MF	GO:0017016	Ras GTPase binding	52/1192	409/22669	3.63082e-09	3.37303e-06	3.37762e-07	Tbc1d8/Dock10/Ngef/Tbc1d20/Sike1/Tbck/C9orf72/Arhgef39/Yipf1/Rap1gap/Dgki/Arhgdib/Arhgef17/Arhgef7/Mcf2l/Adprhl1/Exph5/Dennd4a/Tbc1d2b/Wasf1/Ranbp2/Bcr/Tbc1d30/Srgap1/Ranbp17/Obscn/Arhgef15/Rundc1/Fmnl1/Tbc1d16/Dock4/Sos2/Iqgap2/Vcl/Dennd6a/Spata13/Acap2/Tiam1/Tiam2/Rab11fip3/Daam2/Tbc1d5/Cdc42ep3/Diaph1/Myo5b/Rin1/Sytl5/Wdr44/Flna/Arhgef9/Diaph2/Pak3	52
GO:0016791	MF	GO:0016791	phosphatase activity	38/1192	271/22669	3.48239e-08	3.23514e-05	2.87959e-06	Eya1/Sgpp2/Ptpn7/Ppp2r5a/Pfkfb3/Sec16a/Noct/Pdp1/Rngtt/Plppr1/Ptprd/Ppp1cb/Ppef2/Pptc7/Ppm1k/Dusp11/Ptpro/Ptpn5/Inpp5f/Lhpp/Ptpre/Ptpn9/Nt5e/Ctdspl/Fig4/Ppp1r12a/Ctdsp2/Inpp5j/Ctdnep1/Ppm1d/Nt5c3b/Ppp3cb/Ppm1f/Dusp1/Ppp2r5d/Ppp1ca/Plpp6/Fra10ac1	38
GO:0017048	MF	GO:0017048	Rho GTPase binding	28/1192	168/22669	5.65756e-08	5.25587e-05	4.21041e-06	Dock10/Ngef/Sike1/Arhgef39/Arhgdib/Arhgef17/Arhgef7/Mcf2l/Wasf1/Bcr/Srgap1/Obscn/Arhgef15/Fmnl1/Dock4/Sos2/Iqgap2/Vcl/Spata13/Tiam1/Tiam2/Daam2/Cdc42ep3/Diaph1/Flna/Arhgef9/Diaph2/Pak3	28
GO:0016247	MF	GO:0016247	channel regulator activity	25/1192	143/22669	1.10748e-07	0.000102885	7.14722e-06	Sgk3/Bcl2/Kcnk2/Cacnb2/Kcnip3/Kcns1/Mcub/Pcsk9/Akap9/Kcnip4/Itpr1/Kcna5/Chrna7/Prkcb/Cacng3/Scn3b/Scn4b/Fxyd2/Fgf11/Vti1b/Lynx1/Nedd4l/Kcnip2/Flna/Wnk3	25
GO:0003712	MF	GO:0003712	transcription coregulator activity	51/1192	441/22669	1.15245e-07	0.000107063	7.14722e-06	Per2/Hdac4/Zbtb18/Trib3/Ncoa6/Ncoa3/Hipk1/Psip1/Cited4/Spen/Ezh2/Kdm3a/Kdm5a/Bhlhe41/Mamstr/Prkcb/Dnajb1/Mlip/Tfdp2/Bclaf1/Ncoa7/Ncor1/Med13/Med1/Jup/Psmc3ip/Hdac5/Ddx5/Cys1/Actn1/Actn2/Gmnn/Cdyl/Mak/Phf2/Cenpj/Rbfox2/Mrtfa/Ep300/Kmt2d/Crebbp/Riox2/Nrip1/Bicral/Kctd1/Kdm3b/Dcc/Tle4/Btaf1/Tbl1x/Zxdb	51
GO:0008047	MF	GO:0008047	enzyme activator activity	51/1192	460/22669	4.27845e-07	0.000397468	2.44928e-05	Rgs20/Tbc1d8/Ccnt2/Rgs7/Ppp2r5a/Arhgap21/Dab2ip/Chn1/Ralgapa2/Tbc1d20/Ralgapb/Strit1/Tbck/Rap1gap/Arap2/Mob1b/Agfg2/Arhgdib/Sipa1l3/Arhgap33/Adprhl1/Arhgap10/Dnajb1/Arhgap32/Arhgap20/Tbc1d2b/Arhgap18/Ranbp2/Bcr/Ric8b/Apaf1/Tbc1d30/Srgap1/Igfbp3/Arhgef15/Git1/Taok1/Rundc1/Tbc1d16/Dock4/Ccnk/Rgs14/Iqgap2/Acap2/Tiam2/Pdpk1/Rgs11/Ppp2r5d/Tbc1d5/Arap3/Rin1	51
GO:0004721	MF	GO:0004721	phosphoprotein phosphatase activity	26/1192	171/22669	1.04498e-06	0.000970788	4.94802e-05	Eya1/Ptpn7/Ppp2r5a/Pdp1/Rngtt/Ptprd/Ppp1cb/Ppef2/Pptc7/Ppm1k/Dusp11/Ptpro/Ptpn5/Lhpp/Ptpre/Ptpn9/Ctdspl/Ppp1r12a/Ctdsp2/Ctdnep1/Ppm1d/Ppp3cb/Ppm1f/Dusp1/Ppp2r5d/Ppp1ca	26
GO:0016248	MF	GO:0016248	channel inhibitor activity	11/1192	35/22669	1.05266e-06	0.00097792	4.94802e-05	Bcl2/Kcnk2/Mcub/Pcsk9/Itpr1/Kcna5/Scn3b/Vti1b/Lynx1/Nedd4l/Wnk3	11
GO:0099106	MF	GO:0099106	ion channel regulator activity	20/1192	110/22669	1.06379e-06	0.00098826	4.94802e-05	Sgk3/Kcnk2/Cacnb2/Kcnip3/Kcns1/Mcub/Pcsk9/Akap9/Kcnip4/Itpr1/Kcna5/Prkcb/Scn3b/Fxyd2/Vti1b/Lynx1/Nedd4l/Kcnip2/Flna/Wnk3	20
GO:0005261	MF	GO:0005261	cation channel activity	39/1192	327/22669	1.63775e-06	0.00152147	7.16959e-05	Asic4/Cacna1e/Kcnk2/Cacnb2/Scn3a/Kcna4/Ryr3/Kcnip3/Slc4a11/Kcns1/Chrna4/Kcnn3/Slc24a2/Kcnip4/Hvcn1/Kcnd2/Itpr1/Kcna5/Kcna1/Grin2b/Grik5/Ryr1/Kcnj11/Abcc8/Chrna7/Cacng3/Kcnu1/Scn3b/Scn4b/Htr1b/Trpc1/Hcn2/Kcnh4/Kcnma1/Ptk2b/Kcnq3/Ano6/Kcnip2/Gria3	39
GO:0005216	MF	GO:0005216	ion channel activity	46/1192	421/22669	2.32722e-06	0.00216199	9.28486e-05	Asic4/Cacna1e/Kcnk2/Cacnb2/Scn3a/Kcna4/Ano3/Ryr3/Kcnip3/Slc4a11/Kcns1/Chrna4/Kcnn3/Slc24a2/Gabrd/Kcnip4/Gabra4/Lrrc8b/Lrrc8c/Lrrc8d/Hvcn1/Kcnd2/Itpr1/Ano2/Kcna5/Kcna1/Grin2b/Grik5/Ryr1/Kcnj11/Abcc8/Chrna7/Cacng3/Kcnu1/Scn3b/Scn4b/Htr1b/Trpc1/Hcn2/Kcnh4/Kcnma1/Ptk2b/Kcnq3/Ano6/Kcnip2/Gria3	46
GO:0005244	MF	GO:0005244	voltage-gated ion channel activity	27/1192	190/22669	2.49522e-06	0.00231806	9.28486e-05	Cacna1e/Kcnk2/Cacnb2/Scn3a/Kcna4/Kcnip3/Kcns1/Kcnip4/Hvcn1/Kcnd2/Kcna5/Kcna1/Grin2b/Ryr1/Kcnj11/Cacng3/Kcnu1/Scn3b/Scn4b/Htr1b/Hcn2/Kcnh4/Kcnma1/Ptk2b/Kcnq3/Ano6/Kcnip2	27
GO:0022832	MF	GO:0022832	voltage-gated channel activity	27/1192	190/22669	2.49522e-06	0.00231806	9.28486e-05	Cacna1e/Kcnk2/Cacnb2/Scn3a/Kcna4/Kcnip3/Kcns1/Kcnip4/Hvcn1/Kcnd2/Kcna5/Kcna1/Grin2b/Ryr1/Kcnj11/Cacng3/Kcnu1/Scn3b/Scn4b/Htr1b/Hcn2/Kcnh4/Kcnma1/Ptk2b/Kcnq3/Ano6/Kcnip2	27
GO:0022836	MF	GO:0022836	gated channel activity	38/1192	323/22669	3.08216e-06	0.00286332	0.000108371	Asic4/Cacna1e/Kcnk2/Cacnb2/Scn3a/Kcna4/Ryr3/Kcnip3/Kcns1/Chrna4/Kcnn3/Gabrd/Kcnip4/Gabra4/Hvcn1/Kcnd2/Itpr1/Ano2/Kcna5/Kcna1/Grin2b/Grik5/Ryr1/Kcnj11/Chrna7/Cacng3/Kcnu1/Scn3b/Scn4b/Htr1b/Hcn2/Kcnh4/Kcnma1/Ptk2b/Kcnq3/Ano6/Kcnip2/Gria3	38
GO:0046873	MF	GO:0046873	metal ion transmembrane transporter activity	46/1192	426/22669	3.20362e-06	0.00297616	0.000108371	Slc9a2/Asic4/Slc41a1/Cacna1e/Kcnk2/Cacnb2/Scn3a/Kcna4/Slc12a6/Ryr3/Kcnip3/Slc4a11/Kcns1/Kcnn3/Slc9b2/Slc24a2/Slc9a1/Nipal3/Kcnip4/Slc4a4/Kcnd2/Slc6a6/Itpr1/Kcna5/Kcna1/Grin2b/Slc8a2/Grik5/Ryr1/Kcnj11/Abcc8/Cacng3/Kcnu1/Scn3b/Scn4b/Htr1b/Trpc1/Hcn2/Slc39a5/Kcnh4/Slc39a11/Kcnma1/Kcnq3/Slc1a1/Kcnip2/Cnnm2	46
GO:0035255	MF	GO:0035255	ionotropic glutamate receptor binding	11/1192	39/22669	3.48268e-06	0.00323541	0.000112689	Rapsn/Map1a/Snx27/Grin2b/Shisa7/Cacng3/Neto2/Drd2/Shank3/Gsk3b/Myo5b	11
GO:0140297	MF	GO:0140297	NA	41/1192	365/22669	4.11422e-06	0.00382211	0.000127577	Per2/Hdac4/Bcl2/Rxra/Nek6/Ncoa3/Taf4/Arnt/Psip1/Arid1a/Prdm5/Kdm3a/Bhlhe41/Mamstr/Mef2a/Arntl/Prkcb/Tacc1/Bbs2/Tcf12/Grm1/Ncoa7/Zbtb7a/Cry1/Ncor1/Med13/Med1/Jup/Psmc3ip/Hdac5/Ddx5/Sox9/Gmnn/Rarb/Klf5/Ep300/Crebbp/Gsk3b/Nrip1/Srf/Tle4	41
GO:0008200	MF	GO:0008200	ion channel inhibitor activity	10/1192	33/22669	4.74421e-06	0.00440737	0.000139483	Kcnk2/Mcub/Pcsk9/Itpr1/Kcna5/Scn3b/Vti1b/Lynx1/Nedd4l/Wnk3	10
GO:0005089	MF	GO:0005089	Rho guanyl-nucleotide exchange factor activity	15/1192	73/22669	4.87303e-06	0.00452704	0.000139483	Dock10/Ngef/Arhgef39/Arhgef17/Arhgef7/Mcf2l/Bcr/Obscn/Arhgef15/Dock4/Sos2/Spata13/Tiam1/Tiam2/Arhgef9	15
GO:0015267	MF	GO:0015267	channel activity	48/1192	461/22669	5.38345e-06	0.00500122	0.000143086	Asic4/Bcl2/Cacna1e/Kcnk2/Cacnb2/Scn3a/Kcna4/Ano3/Ryr3/Kcnip3/Slc4a11/Kcns1/Chrna4/Kcnn3/Slc24a2/Gabrd/Kcnip4/Gabra4/Lrrc8b/Lrrc8c/Lrrc8d/Hvcn1/Kcnd2/Itpr1/Ano2/Kcna5/Kcna1/Grin2b/Grik5/Ryr1/Kcnj11/Abcc8/Chrna7/Cacng3/Kcnu1/Scn3b/Scn4b/Htr1b/Trpc1/Hcn2/Kcnh4/Kcnma1/Ptk2b/Kcnq3/Panx2/Ano6/Kcnip2/Gria3	48
GO:0022803	MF	GO:0022803	passive transmembrane transporter activity	48/1192	461/22669	5.38345e-06	0.00500122	0.000143086	Asic4/Bcl2/Cacna1e/Kcnk2/Cacnb2/Scn3a/Kcna4/Ano3/Ryr3/Kcnip3/Slc4a11/Kcns1/Chrna4/Kcnn3/Slc24a2/Gabrd/Kcnip4/Gabra4/Lrrc8b/Lrrc8c/Lrrc8d/Hvcn1/Kcnd2/Itpr1/Ano2/Kcna5/Kcna1/Grin2b/Grik5/Ryr1/Kcnj11/Abcc8/Chrna7/Cacng3/Kcnu1/Scn3b/Scn4b/Htr1b/Trpc1/Hcn2/Kcnh4/Kcnma1/Ptk2b/Kcnq3/Panx2/Ano6/Kcnip2/Gria3	48
GO:0051015	MF	GO:0051015	actin filament binding	28/1192	210/22669	5.7671e-06	0.00535764	0.000147998	Arpc2/Actr3/Cacnb2/Nebl/Sptbn5/Myh7b/Nexn/Tpm2/Add1/Ablim2/Hip1/Ppp1r9a/Tpm1/Tln2/Vill/Syne1/Ctnna3/Gas7/Myo1d/Fmnl1/Actn1/Actn2/Iqgap2/Vcl/Dmtn/Svil/Myo5b/Flna	28
GO:0035254	MF	GO:0035254	glutamate receptor binding	14/1192	67/22669	8.1706e-06	0.00759048	0.000202688	Arpc2/Rapsn/Map1a/Snx27/Grin2b/Shisa7/Ptpn5/Cacng3/Neto2/Drd2/Adora2a/Shank3/Gsk3b/Myo5b	14

## Sheet: GO_all
	ONTOLOGY	ID	Description	GeneRatio	BgRatio	pvalue	p.adjust	qvalue	geneID	Count
GO:0050808	BP	GO:0050808	synapse organization	123/2659	479/23328	1.45929e-18	8.77325e-15	6.9585e-15	Epha4/Dock10/Ngef/Actr3/Ppfia4/Cacnb2/Dab2ip/Zfp804a/Rapsn/Lzts3/Prnp/Flrt3/Syndig1/Ghsr/Mfn1/Glrb/Sema4a/Chrnb2/Snx27/Unc13b/Musk/Ptprd/Ptprf/Rims3/Adgrb2/Wasf2/Ephb2/Clstn1/Agrn/Fzd1/Rheb/Dok7/Ssh1/Cux2/Ache/Elfn1/Sdk1/Ppp1r9a/Cttnbp2/Ptn/Oxtr/Camk1/Vhl/Plxnd1/Iqsec3/Grin2b/Ptpro/Caprin2/Shisa7/Slc8a2/Arhgap33/Shank1/Ppfia3/Chrna7/Igf1r/Ntrk3/Mesd/Apbb1/Insr/Arhgef7/Glra3/Rab3a/Unc13a/Adgrl1/Cd…	123
GO:1990778	BP	GO:1990778	protein localization to cell periphery	97/2659	363/23328	4.1101e-16	2.47099e-12	9.16885e-13	Kcnb2/Ankrd39/Vil1/Pid1/Dpp10/Actr3/Lypd1/Atp2b4/Atp1b1/Cnst/Ppp2r5a/Cacnb2/Sec16a/Rapsn/Kcnip3/Prnp/Snap25/Lama5/Ghsr/Tnik/Prkci/S100a10/Snx27/Pip5k1a/Gpsm2/Camk2d/Tspan5/Rab3b/Epb41/Ephb2/Clstn1/Nsg1/Kcnip4/Wdr19/Tesc/Tspan33/C2cd5/Sptbn4/Akt2/Kcnj11/Dlg2/Dchs1/Tub/Cacng3/Hras/Rab3a/Bbs2/Atp2c2/Scn3b/Pdzd3/Ptpn9/Dag1/Golga4/Epm2a/Map7/Epb41l2/Lin7a/Camk2b/Sqstm1/Snap47/Git1/Flot2/Itga3/Jup/Cacn…	97
GO:0042391	BP	GO:0042391	regulation of membrane potential	112/2659	450/23328	5.76848e-16	3.46801e-12	9.16885e-13	Pid1/Bok/Bcl2/Atp1b1/Rgs4/Rgs7/Kcnk2/Cacnb2/Scn3a/Src/Chrna4/Mfn1/Glrb/Npy2r/Chrnb2/Pias3/Casq2/Kcnd3/Camk2d/Unc13b/Ptpn3/Rims3/Oprd1/Slc9a1/Slc25a33/Kcnab2/Gabrd/Agrn/Akap9/Slc26a5/Kcnh2/Ywhah/Gabra4/Slc4a4/Ssh1/Cux2/Ppp1r9a/Tac1/Kcnd2/Ptn/Dgki/Foxp1/Bid/Kcna5/Kcna1/Grin2b/Slc8a2/Grik5/Akt2/Kcnk6/Ffar3/Scn1b/Shank1/Trpm4/Kcnj11/Chrna7/Ntrk3/Drd4/Rnf122/Glra3/Wwp2/Scn3b/Tmem25/Scn4b/Chrnb4/Hcn4/T…	112
GO:0010959	BP	GO:0010959	regulation of metal ion transport	107/2659	427/23328	1.58187e-15	9.51022e-12	1.88576e-12	Hecw2/Serpine2/Bcl2/Dpp10/Atp2b4/Atp1b1/Rgs4/Nos1ap/Rgs7/Akt3/Slc30a10/Cacnb2/Lrrc55/Chp1/Kcnip3/Prnp/Fkbp1a/Kcns1/Oprl1/Trpc3/Strit1/Snx27/Casq2/Camk2d/Chd7/Nkain3/Creb3/Ptpn3/Pcsk9/Hpca/Epb41/Oprd1/Slc9a1/Kcnab2/Agrn/Akap9/Kcnh2/Nos3/Ywhah/Kcnip4/Stim2/Iscu/Tesc/Adcyap1r1/Itpr1/Cd4/Kcna5/Kcna1/Sptbn4/Akt2/Scn1b/Abcc8/Cemip/Drd4/Saraf/Homer3/Neto2/Gnao1/Wwp2/Atp2c2/Trpc6/Npsr1/Scn3b/Scn4b/Fxyd2/…	107
GO:0034765	BP	GO:0034765	regulation of ion transmembrane transport	117/2659	489/23328	2.79486e-15	1.68027e-11	2.66542e-12	Kcnb2/Hecw2/Per2/Dpp10/Atp2b4/Cacna1e/Atp1b1/Rgs4/Nos1ap/Kcnj9/Rgs7/Cacnb2/Kcnj3/Scn3a/Lrrc55/Kcna4/Chp1/Kcnip3/Prnp/Fkbp1a/Kcns1/Chrna4/Oprl1/Strit1/Snx27/Casq2/Kcnd3/Camk2d/Chd7/Ptpn3/Pcsk9/Hpca/Slc9a1/Ephb2/Kcnab2/Agrn/Akap9/Slc26a5/Kcnh2/Ywhah/Kcnip4/Stim2/Iscu/Tesc/Hvcn1/Kcnd2/Tcaf1/Kcna5/Kcna1/Akt2/Scn1b/Shank1/Kcnc3/Kcnj11/Abcc8/Cemip/Cacng3/Gsg1l/Drd4/Kcnu1/Neto2/Wwp2/Kcng4/Trpc6/Npsr1/Sc…	117
GO:0050807	BP	GO:0050807	regulation of synapse organization	79/2659	277/23328	4.77558e-15	2.87108e-11	3.40195e-12	Epha4/Ngef/Actr3/Dab2ip/Zfp804a/Rapsn/Lzts3/Prnp/Flrt3/Syndig1/Ghsr/Mfn1/Sema4a/Chrnb2/Snx27/Musk/Ptprd/Ptprf/Rims3/Adgrb2/Ephb2/Clstn1/Agrn/Fzd1/Rheb/Ssh1/Cux2/Ppp1r9a/Cttnbp2/Ptn/Oxtr/Camk1/Vhl/Grin2b/Ptpro/Caprin2/Shisa7/Arhgap33/Chrna7/Ntrk3/Mesd/Adgrl1/Cdh8/Egln1/Drd2/Tpbg/Sema3f/Camkv/Dag1/Camk2b/Sparc/Ntn1/Arhgef15/Baiap2/Dgkb/Lrrn3/Lrfn5/Numb/Flrt2/Slitrk1/Slitrk6/Adgrb1/Nptxr/Shank3/Eif4…	79
GO:0071805	BP	GO:0071805	potassium ion transmembrane transport	64/2659	200/23328	4.99403e-15	3.00241e-11	3.40195e-12	Kcnb2/Slc9a2/Dpp10/Atp1b1/Rgs4/Kcnj9/Rgs7/Kcnk2/Kcnj3/Lrrc55/Kcna4/Slc12a6/Kcnip3/Prnp/Slc24a3/Kcns1/Kcnn3/Snx27/Casq2/Kcnd3/Slc24a2/Slc9a1/Kcnab2/Agrn/Akap9/Kcnh2/Kcnip4/Kcnd2/Kcna5/Kcna1/Kcnk6/Kcnc3/Kcnj11/Abcc8/Kcnu1/Kcnn1/Neto2/Slc9a5/Wwp2/Kcng4/Hcn4/Slc9a9/Akap7/Hcn2/Kcnip1/Kcnh4/Slc24a4/Actn2/Kcnma1/Kcns2/Kcnv1/Kcnq3/Kcnk9/Ano6/Kcnh3/Kcnh8/Kcnn2/Nedd4l/Kcng2/Kcnk4/Kcnip2/Slc9a7/Flna/Wnk3	64
GO:0015672	BP	GO:0015672	monovalent inorganic cation transport	115/2659	489/23328	1.75776e-14	1.05677e-10	1.03571e-11	Kcnb2/Slc9a2/Hecw2/Asic4/Serpine2/Dpp10/Atp2b4/Atp1b1/Rgs4/Kcnj9/Rgs7/Akt3/Kcnk2/Kcnj3/Slc4a10/Scn3a/Lrrc55/Commd9/Kcna4/Slc12a6/Chp1/Kcnip3/Slc4a11/Prnp/Slc24a3/Kcns1/Kcnn3/Snx27/Casq2/Kcnd3/Camk2d/Slc9b2/Nkain3/Ptpn3/Slc24a2/Pcsk9/Slc9a1/Kcnab2/Agrn/Akap9/Kcnh2/Nos3/Ywhah/Kcnip4/Slc4a4/Tesc/Hvcn1/Kcnd2/Atp6v0e2/Slc6a6/Slc6a11/Kcna5/Kcna1/Slc8a2/Sptbn4/Akt2/Kcnk6/Scn1b/Kcnc3/Trpm4/Kcnj11/Abcc8/D…	115
GO:0050803	BP	GO:0050803	regulation of synapse structure or activity	80/2659	289/23328	1.95481e-14	1.17523e-10	1.03571e-11	Epha4/Ngef/Actr3/Dab2ip/Zfp804a/Rapsn/Lzts3/Prnp/Flrt3/Syndig1/Ghsr/Mfn1/Sema4a/Chrnb2/Snx27/Musk/Ptprd/Ptprf/Rims3/Adgrb2/Ephb2/Clstn1/Agrn/Fzd1/Rheb/Ssh1/Cux2/Ppp1r9a/Cttnbp2/Ptn/Oxtr/Camk1/Vhl/Grin2b/Ptpro/Caprin2/Shisa7/Arhgap33/Chrna7/Ntrk3/Mesd/Adgrl1/Cdh8/Egln1/Drd2/Tpbg/Sema3f/Camkv/Dag1/Slc17a8/Camk2b/Sparc/Ntn1/Arhgef15/Baiap2/Dgkb/Lrrn3/Lrfn5/Numb/Flrt2/Slitrk1/Slitrk6/Adgrb1/Nptxr/Sha…	80
GO:0006813	BP	GO:0006813	potassium ion transport	69/2659	240/23328	1.65387e-13	9.94305e-10	7.88634e-11	Kcnb2/Slc9a2/Dpp10/Atp1b1/Rgs4/Kcnj9/Rgs7/Kcnk2/Kcnj3/Lrrc55/Kcna4/Slc12a6/Kcnip3/Prnp/Slc24a3/Kcns1/Kcnn3/Snx27/Casq2/Kcnd3/Slc24a2/Slc9a1/Kcnab2/Agrn/Akap9/Kcnh2/Nos3/Kcnip4/Kcnd2/Kcna5/Kcna1/Kcnk6/Kcnc3/Kcnj11/Abcc8/Kcnu1/Kcnn1/Neto2/Slc9a5/Wwp2/Kcng4/Fxyd2/Drd2/Hcn4/Slc9a9/Akap7/Hcn2/Kcnip1/Kcnh4/Slc24a4/Actn2/Kcnma1/Ptk2b/Kcns2/Kcnv1/Kcnq3/Kcnk9/Atf4/Ano6/Kcnh3/Kcnh8/Kcnn2/Nedd4l/Kcng2/Kcnk4…	69
GO:0016311	BP	GO:0016311	dephosphorylation	93/2659	374/23328	1.8419e-13	1.10735e-09	7.9845e-11	Eya1/Slc39a10/Sgpp2/Dusp28/Ppp1r7/Bcl2/Ptpn7/Cnst/Ppp2r5a/Ppp1r26/Ptpa/Spred1/Chp1/Fkbp1a/Src/Ppp1r16b/Nceh1/Slc7a14/Smg5/Ensa/Cttnbp2nl/Pdp1/Rngtt/Plppr1/Ptpn3/Ptprd/Ptprf/Ptp4a2/Camta1/Ppm1g/Ppp1cb/Ssh1/Ppp1cc/Pptc7/Rimbp2/Elfn1/Ppm1k/Thnsl2/Dusp11/Ptpro/Igbp1b/Ppp5c/Timm50/Vrk3/Lmtk3/Ptpn5/Dlg2/Smpd1/Inpp5f/Lhpp/Ptpre/Ppp2r2d/Drd2/Ptpn9/Smad3/Dusp7/Epm2a/Plppr3/Ptprq/Ppp1r12a/Ctdsp2/Inpp5j/Dus…	93
GO:0099173	BP	GO:0099173	postsynapse organization	61/2659	200/23328	2.40917e-13	1.44839e-09	9.57327e-11	Epha4/Dock10/Ngef/Actr3/Zfp804a/Rapsn/Lzts3/Prnp/Ghsr/Mfn1/Glrb/Snx27/Musk/Ptprd/Ptprf/Wasf2/Ephb2/Agrn/Rheb/Ssh1/Cux2/Ppp1r9a/Ptn/Vhl/Grin2b/Caprin2/Shisa7/Arhgap33/Shank1/Chrna7/Igf1r/Ntrk3/Mesd/Insr/Arhgef7/Egln1/Cadm1/Sema3f/Zfp365/Camk2b/Itga3/Baiap2/Dgkb/Actn1/Numb/Ndrg2/Adgrb1/Nptxr/Shank3/Etv5/Chmp2b/Tiam1/Lrfn2/Ptprs/Myo5b/Nrxn2/Sorbs1/Hdac6/Cask/Arhgef9/Pak3	61
GO:0045666	BP	GO:0045666	positive regulation of neuron differentiation	108/2659	472/23328	7.27506e-13	4.37376e-09	2.6685e-10	Epha4/Serpine2/Bcl2/Actr3/Syt2/Brinp3/Brinp2/Dab2ip/Zfp804a/Ltk/Prkci/Skil/Mfn1/Brinp1/Ptprd/Plaa/Ror1/Ptprf/Fzd1/Fbxw8/Rasal1/Cux2/Ache/Ppp1r9a/Plxna4/Ptn/Ezh2/Plxna1/Itpr1/Cpne9/Camk1/Plxnd1/Caprin2/Scn1b/Shank1/Ptpn5/Igf1r/Ntrk3/Cpeb1/Sh3gl3/Gdpd5/Apbb1/Syt17/Mob2/Unc13a/Katnb1/Trpc6/Islr2/Bnip2/Tcf12/Tmem30a/Plxnb1/Golga4/Trak1/Fig4/Plk5/Tle6/Camk2b/Vwc2/Trpv2/Ntn1/Cyb5d2/Mmd/Nme1/Itga3/Atp5g…	108
GO:0006470	BP	GO:0006470	protein dephosphorylation	66/2659	235/23328	1.80178e-12	1.08323e-08	6.13689e-10	Eya1/Slc39a10/Dusp28/Ppp1r7/Bcl2/Ptpn7/Ppp2r5a/Ptpa/Fkbp1a/Ppp1r16b/Nceh1/Ensa/Cttnbp2nl/Pdp1/Ptpn3/Ptprd/Ptprf/Ptp4a2/Camta1/Ppm1g/Ppp1cb/Ssh1/Ppp1cc/Pptc7/Ppm1k/Dusp11/Ptpro/Ppp5c/Timm50/Vrk3/Ptpn5/Smpd1/Lhpp/Ptpre/Ppp2r2d/Drd2/Ptpn9/Dusp7/Epm2a/Ptprq/Ppp1r12a/Ctdsp2/Dusp18/Mtmr3/Ublcp1/Ctdnep1/Ppm1d/Akap1/Ppp1r1b/Ppp4r4/Ptpdc1/Vcan/Ppp3cb/Ppp2r2a/Ptp4a3/Ppp1r16a/Ppm1f/Pgp/Dusp1/Ppp2r5d/Ptprs/P…	66
GO:0031346	BP	GO:0031346	positive regulation of cell projection organization	107/2659	478/23328	3.96722e-12	2.38509e-08	1.26116e-09	Arpc2/Vil1/Epha4/Serpine2/Hdac4/Actr3/Syt2/Dab2ip/Myo3b/Zfp804a/Ltk/Src/Prkci/Skil/Mfn1/Ptprd/Plaa/Ror1/Ptprf/Wasf2/Crocc/Agrn/Fzd1/Dynll1/Fbxw8/Rasal1/Cux2/Auts2/Ache/Ppp1r9a/Plxna4/Ptn/Ezh2/Plxna1/Itpr1/Cpne9/Camk1/Brk1/Plxnd1/Caprin2/Scn1b/Shank1/Ptpn5/Igf1r/Ntrk3/Cpeb1/Apbb1/Syt17/Hras/Mob2/Unc13a/Katnb1/Atmin/Islr2/Tmem30a/Plxnb1/Golga4/Trak1/Fig4/Plk5/Camk2b/Trpv2/Ntn1/Nme1/Itga3/Atp5g1/Hap…	107
GO:0032409	BP	GO:0032409	regulation of transporter activity	73/2659	280/23328	6.52439e-12	3.92246e-08	1.94444e-09	Hecw2/Bcl2/Atp1b1/Nos1ap/Cacnb2/Lrrc55/Chp1/Prnp/Fkbp1a/Kcns1/Chrna4/Oprl1/Strit1/Snx27/Casq2/Cttnbp2nl/Camk2d/Ptpn3/Pcsk9/Hpca/Slc9a1/Ephb2/Agrn/Akap9/Ywhah/Stim2/Tesc/Tcaf1/Kcna1/Scn1b/Shank1/Kcnj11/Abcc8/Cacng3/Gsg1l/Drd4/Insr/Neto2/Wwp2/Trpc6/Scn3b/Kmt2a/Scn4b/Fxyd2/Drd2/Akap7/Trdn/Hk1/Jsrp1/Fgf11/Mink1/Hap1/Crhr1/Cacng5/Hspa2/Coa8/Actn2/Glrx/Rasgrf2/Slmap/Ptk2b/Ndfip2/Kcns2/Shank3/Cacnb3/Shi…	73
GO:0072659	BP	GO:0072659	protein localization to plasma membrane	75/2659	295/23328	1.26553e-11	7.60837e-08	3.54976e-09	Kcnb2/Ankrd39/Vil1/Pid1/Dpp10/Actr3/Lypd1/Atp2b4/Atp1b1/Cnst/Ppp2r5a/Cacnb2/Sec16a/Kcnip3/Prnp/Lama5/Tnik/Prkci/S100a10/Snx27/Pip5k1a/Camk2d/Tspan5/Rab3b/Ephb2/Nsg1/Kcnip4/Tesc/Tspan33/C2cd5/Sptbn4/Akt2/Kcnj11/Dchs1/Rab3a/Bbs2/Atp2c2/Scn3b/Pdzd3/Ptpn9/Golga4/Epm2a/Map7/Camk2b/Sqstm1/Flot2/Itga3/Jup/Rab40b/Vti1b/Numb/Zdhhc22/Amn/Actn2/Tspan17/Ptch1/Fcho2/Rab3c/Slmap/Adcy6/Cacnb3/Pkp2/Zdhhc23/Pdpk1…	75
GO:0007409	BP	GO:0007409	axonogenesis	105/2659	482/23328	3.51354e-11	2.11234e-07	9.30779e-09	Sema4c/Raph1/Epha4/Bcl2/Actr3/Enah/Chn1/Map1a/Flrt3/Vstm2l/B4galt5/Lama5/Bhlhe22/Skil/Dclk1/Sema4a/Efna3/Chrnb2/Sema6c/Nexn/C9orf72/Zswim5/Epha10/Stmn1/Ephb2/Agrn/Sema3d/Sema3a/Fgfr3/Auts2/Ache/Lmtk2/Plxna4/Sema4f/Plxna1/Foxp1/Cntn4/Plxnd1/Ptpro/Sptbn4/Scn1b/Igf1r/Ntrk3/Apbb1/Brsk2/Rab3a/Zswim4/Drd2/Islr2/Prtg/Sema3f/Dag1/Plxnb1/Golga4/Trak1/Ust/Adarb1/Nefh/Slit3/Kif3a/Trpv2/Ntn1/Rtn4rl1/Pitpna/A…	105
GO:1904062	BP	GO:1904062	regulation of cation transmembrane transport	85/2659	361/23328	4.32822e-11	2.60213e-07	1.08625e-08	Hecw2/Dpp10/Atp2b4/Atp1b1/Rgs4/Nos1ap/Rgs7/Cacnb2/Lrrc55/Chp1/Kcnip3/Prnp/Fkbp1a/Kcns1/Chrna4/Oprl1/Strit1/Snx27/Casq2/Camk2d/Chd7/Ptpn3/Pcsk9/Hpca/Slc9a1/Ephb2/Kcnab2/Agrn/Akap9/Kcnh2/Ywhah/Kcnip4/Stim2/Iscu/Tesc/Kcna1/Scn1b/Shank1/Kcnj11/Abcc8/Cemip/Cacng3/Gsg1l/Drd4/Neto2/Wwp2/Npsr1/Scn3b/Scn4b/Fxyd2/Drd2/Trpc1/Scn5a/Akap7/Trdn/Jsrp1/Kcnip1/Fgf11/Mink1/Hap1/Crhr1/Cacng5/Hspa2/Coa8/Actn2/Drd1/G…	85
GO:0043270	BP	GO:0043270	positive regulation of ion transport	80/2659	334/23328	6.59711e-11	3.96618e-07	1.57289e-08	Atp1b1/Rgs7/Akt3/Cacnb2/Lrrc55/Chp1/Avp/Cebpb/Chrna4/Trpc3/Strit1/Npy2r/Chrnb2/Creb3/Rab3b/Fabp3/Slc9a1/Ephb2/Akap9/Abcb4/Kcnh2/Nat8l/Stim2/Atp8a1/Tesc/Tcaf1/Adcyap1r1/Itpr1/Cd4/Kcna1/Grin2b/Akt2/Scn1b/Kcnj11/Abcc8/Cemip/Cacng3/Drd4/Atp2c2/Trpc6/Npsr1/Scn3b/Scn4b/Drd2/Trpc1/Scn5a/Akap7/Trdn/Adora2a/Mapk9/Trpv2/Arrb2/Mllt6/Hap1/Map2k6/Hspa2/Coa8/Actn2/Drd1/Glrx/Stc1/Pdgfb/Atf4/Shank3/Ano6/Cacnb3/G…	80
GO:0010976	BP	GO:0010976	positive regulation of neuron projection development	86/2659	372/23328	9.09591e-11	5.46846e-07	2.06539e-08	Epha4/Serpine2/Actr3/Syt2/Dab2ip/Zfp804a/Ltk/Prkci/Skil/Mfn1/Ptprd/Plaa/Ror1/Ptprf/Fzd1/Fbxw8/Rasal1/Cux2/Ache/Ppp1r9a/Plxna4/Ptn/Ezh2/Plxna1/Itpr1/Cpne9/Camk1/Plxnd1/Caprin2/Scn1b/Shank1/Ptpn5/Igf1r/Ntrk3/Cpeb1/Apbb1/Syt17/Mob2/Unc13a/Katnb1/Islr2/Tmem30a/Plxnb1/Golga4/Trak1/Fig4/Plk5/Camk2b/Trpv2/Ntn1/Nme1/Itga3/Atp5g1/Hap1/Baiap2/Kidins220/Numb/Eif2b2/Enc1/Ptk2b/Nefl/Slitrk1/Ep300/Shank3/Map3k…	86
GO:0022898	BP	GO:0022898	regulation of transmembrane transporter activity	68/2659	270/23328	1.76165e-10	1.0591e-06	3.81831e-08	Hecw2/Bcl2/Atp1b1/Nos1ap/Cacnb2/Lrrc55/Chp1/Prnp/Fkbp1a/Kcns1/Chrna4/Oprl1/Strit1/Snx27/Casq2/Camk2d/Ptpn3/Pcsk9/Hpca/Slc9a1/Ephb2/Agrn/Akap9/Ywhah/Stim2/Tesc/Tcaf1/Kcna1/Scn1b/Shank1/Kcnj11/Abcc8/Cacng3/Gsg1l/Drd4/Neto2/Wwp2/Trpc6/Scn3b/Scn4b/Fxyd2/Drd2/Akap7/Trdn/Hk1/Jsrp1/Fgf11/Mink1/Hap1/Crhr1/Cacng5/Hspa2/Coa8/Actn2/Glrx/Rasgrf2/Slmap/Ptk2b/Kcns2/Shank3/Cacnb3/Shisa9/Ifngr2/Pim1/Nedd4l/Ahnak…	68
GO:0032412	BP	GO:0032412	regulation of ion transmembrane transporter activity	66/2659	259/23328	1.90215e-10	1.14357e-06	3.94359e-08	Hecw2/Atp1b1/Nos1ap/Cacnb2/Lrrc55/Chp1/Prnp/Fkbp1a/Kcns1/Chrna4/Oprl1/Strit1/Snx27/Casq2/Camk2d/Ptpn3/Pcsk9/Hpca/Slc9a1/Ephb2/Agrn/Akap9/Ywhah/Stim2/Tesc/Tcaf1/Kcna1/Scn1b/Shank1/Kcnj11/Abcc8/Cacng3/Gsg1l/Drd4/Neto2/Wwp2/Trpc6/Scn3b/Scn4b/Fxyd2/Drd2/Akap7/Trdn/Hk1/Jsrp1/Fgf11/Mink1/Hap1/Crhr1/Cacng5/Hspa2/Coa8/Actn2/Glrx/Rasgrf2/Slmap/Ptk2b/Kcns2/Shank3/Cacnb3/Shisa9/Ifngr2/Nedd4l/Ahnak/Rgn/Wnk3	66
GO:0048511	BP	GO:0048511	rhythmic process	73/2659	301/23328	2.44735e-10	1.47135e-06	4.8625e-08	Per2/Src/Top1/Oprl1/Cyp7b1/Noct/Gpr149/Npy2r/Chrnb2/Ciart/Edn2/Sfpq/Nos3/Ppp1cb/Ppp1cc/Zp3/Kcnd2/Ptn/Ezh2/Kdm5a/Grin2b/Bhlhe41/Relb/Dbp/Chrna7/Igf1r/Ntrk3/Cckbr/Arntl/Kdm8/Drd4/Retn/Cul4a/Npy5r/Nr2f6/Kmt2a/Drd2/Rora/Spsb4/Adora2a/Cry1/Mapk9/Srebf1/Ncor1/Per1/Arrb2/Hlf/Nr1d1/Stat5a/Ddx5/Csnk1d/Cipc/Drd1/Kcnma1/Ptger4/Klf10/Atf4/Ep300/Tef/Crebbp/Gsk3b/Nrip1/Fbxl17/Six3/Crem/Egr1/Ppp1ca/Grk2/Klf9/Bt…	73
GO:0001508	BP	GO:0001508	action potential	43/2659	138/23328	3.69299e-10	2.22023e-06	7.04389e-08	Cacnb2/Scn3a/Chrna4/Chrnb2/Kcnd3/Camk2d/Ptpn3/Slc9a1/Kcnab2/Kcnh2/Ywhah/Tac1/Kcnd2/Foxp1/Kcna5/Kcna1/Grin2b/Slc8a2/Ffar3/Scn1b/Trpm4/Chrna7/Ntrk3/Scn3b/Scn4b/Chrnb4/Hcn4/Scn5a/Scn11a/Ctnna3/Kcnip1/P2rx5/Cacna1g/Jup/Cntnap1/Drd1/Kcnma1/Slmap/Cacnb3/Pkp2/Kcnn2/Nedd4l/Flna	43
GO:0010769	BP	GO:0010769	regulation of cell morphogenesis involved in differentiation	80/2659	351/23328	8.33902e-10	5.01342e-06	1.50286e-07	Sema4c/Hecw2/Arpc2/Epha4/Ngef/Actr3/Chn1/Lzts3/Tnik/Skil/Mfn1/Sema4a/Chrnb2/S100a10/Sema6c/Ptprd/Zswim5/Ptprf/Ephb2/Agrn/Sema3d/Sema3a/Ywhah/Fbxw8/Cux2/Ache/Ppp1r9a/Plxna4/Sema4f/Plxna1/Plxnd1/Caprin2/Arhgap33/Ntrk3/Brsk2/Zswim4/Trpc6/Islr2/Sema3f/Plxnb1/Golga4/Trak1/Syne1/Ust/Camk2b/Mapk9/Trpv2/Ntn1/Atp5g1/Baiap2/Numb/Eif2b2/Net1/Rreb1/Nedd9/Sema3g/Nefm/Nefl/Dmtn/Slitrk1/Ep300/Shank3/Map3k13/Gsk…	80
GO:0043087	BP	GO:0043087	regulation of GTPase activity	72/2659	303/23328	8.50956e-10	5.11595e-06	1.50286e-07	Tbc1d8/Epha4/Dock10/Ngef/Rgs16/Rabgap1l/Rgs4/Rgs7/Gpsm1/Vav2/Dab2ip/Chn1/Arhgap1/Ralgapa2/Tbc1d20/Ralgapb/S100a10/Pip5k1a/Tbck/Wnt4/Rap1gap/Agrn/Cpeb2/Arap2/Rasal1/Cav2/Plxna4/Dgki/Ezh2/Chn2/Plxna1/Plxnd1/Iqsec3/Akt2/Ntrk3/Rgs10/Hras/Arhgef7/Adprhl1/Rasa3/Gnao1/Ccl17/Tbc1d2b/Plxnb1/Bcr/Prtn3/Tbc1d30/Tbc1d10a/Arhgef15/Arrb2/Sgsm2/Abr/Rundc1/Tbc1d16/Net1/Nedd9/Rgs14/Iqgap2/Ptk2b/Lrch1/Sgsm3/Rangap1…	72
GO:0002028	BP	GO:0002028	regulation of sodium ion transport	33/2659	93/23328	9.80895e-10	5.89714e-06	1.67047e-07	Hecw2/Serpine2/Atp2b4/Atp1b1/Akt3/Chp1/Camk2d/Nkain3/Ptpn3/Pcsk9/Slc9a1/Agrn/Nos3/Ywhah/Tesc/Sptbn4/Akt2/Scn1b/Drd4/Neto2/Scn3b/Scn4b/Fxyd2/Drd2/Scn5a/Nkain2/Per1/Fgf11/Mllt6/Glrx/Slmap/Nedd4l/Wnk3	33
GO:0099175	BP	GO:0099175	regulation of postsynapse organization	41/2659	132/23328	1.04543e-09	6.2851e-06	1.71898e-07	Epha4/Ngef/Actr3/Zfp804a/Rapsn/Lzts3/Prnp/Ghsr/Mfn1/Snx27/Musk/Ptprd/Ptprf/Rheb/Ssh1/Cux2/Ppp1r9a/Ptn/Vhl/Grin2b/Caprin2/Shisa7/Arhgap33/Ntrk3/Mesd/Egln1/Sema3f/Camk2b/Baiap2/Dgkb/Numb/Nptxr/Shank3/Chmp2b/Tiam1/Lrfn2/Ptprs/Sorbs1/Cask/Arhgef9/Pak3	41
GO:0007264	BP	GO:0007264	small GTPase mediated signal transduction	93/2659	437/23328	1.64465e-09	9.88766e-06	2.61413e-07	Arhgef4/Dock10/Ngef/Ralb/Ralgps2/Itpkb/Vav2/Dab2ip/Chn1/Arhgap1/Rhov/Ralgapa2/Src/Ralgapb/Arhgef11/Gpsm2/Camk2d/Ssx2ip/Arhgef39/Abca1/Wasf2/Stmn1/Ephb2/Rap1gap/Arhgef10l/Rheb/Ksr2/Rasal1/Auts2/Sh2b2/Dgki/Adcyap1r1/Fgd5/Brk1/Iqsec3/Arhgdib/Rerg/Sipa1l3/Arhgap33/Akap13/Arhgef17/Hras/Arhgef7/Mcf2l/Rasa3/Sipa1l2/Dock6/Arhgap32/Usp28/Dennd4a/Bnip2/Arhgap18/Wasf1/Bcr/Srgap1/Arhgef25/Rasgef1c/Obscn/Ntn1…	93
GO:0006814	BP	GO:0006814	sodium ion transport	59/2659	234/23328	2.64739e-09	1.59161e-05	4.07222e-07	Slc9a2/Hecw2/Asic4/Serpine2/Atp2b4/Atp1b1/Akt3/Slc4a10/Scn3a/Commd9/Chp1/Slc4a11/Slc24a3/Camk2d/Slc9b2/Nkain3/Ptpn3/Slc24a2/Pcsk9/Slc9a1/Agrn/Nos3/Ywhah/Slc4a4/Tesc/Slc6a6/Slc6a11/Slc8a2/Sptbn4/Akt2/Scn1b/Trpm4/Drd4/Neto2/Slc9a5/Scn3b/Scn4b/Fxyd2/Drd2/Hcn4/Slc9a9/Scn5a/Scn11a/Nkain2/Hcn2/Slc17a8/Slc6a15/Per1/Fgf11/Slc13a5/Mllt6/Slc24a4/Glrx/Slmap/Ano6/Nedd4l/Slc9a7/Maged2/Wnk3	59
GO:0003015	BP	GO:0003015	heart process	58/2659	231/23328	4.2529e-09	2.55684e-05	6.25545e-07	Ankrd39/Hdac4/Atp2b4/Tnnt2/Cacna1e/Atp1b1/Rgs4/Cacnb2/Src/Strit1/Casq2/Kcnd3/Camk2d/Edn2/Slc9a1/Agrn/Sema3a/Kcnh2/Nos3/Tac1/Kcna5/Sptbn4/Ffar3/Scn1b/Trpm4/Chrna7/Mef2a/Akap13/Gnao1/Scn3b/Scn4b/Drd2/Hcn4/Tpm1/Cacna2d2/Gpx1/Scn5a/Trdn/Ctnna3/Srebf1/Map2k3/Cacna1g/Jup/Map2k6/Gaa/Thrb/Stc1/Tmem65/Rbfox2/Pkp2/Rps6ka2/Hbegf/Kcnn2/Nedd4l/Grk2/Slc1a1/Jak2/Flna	58
GO:0035725	BP	GO:0035725	sodium ion transmembrane transport	42/2659	143/23328	4.32911e-09	2.60266e-05	6.25545e-07	Slc9a2/Hecw2/Asic4/Atp2b4/Atp1b1/Scn3a/Chp1/Slc24a3/Camk2d/Ptpn3/Slc24a2/Pcsk9/Slc9a1/Agrn/Ywhah/Slc4a4/Tesc/Slc6a6/Slc6a11/Slc8a2/Scn1b/Trpm4/Drd4/Neto2/Slc9a5/Scn3b/Scn4b/Fxyd2/Hcn4/Slc9a9/Scn5a/Scn11a/Hcn2/Slc6a15/Fgf11/Slc24a4/Glrx/Slmap/Ano6/Nedd4l/Slc9a7/Wnk3	42
GO:0060047	BP	GO:0060047	heart contraction	56/2659	221/23328	5.48553e-09	3.2979e-05	7.69334e-07	Ankrd39/Hdac4/Atp2b4/Tnnt2/Cacna1e/Atp1b1/Rgs4/Cacnb2/Strit1/Casq2/Kcnd3/Camk2d/Edn2/Slc9a1/Agrn/Sema3a/Kcnh2/Nos3/Tac1/Kcna5/Sptbn4/Ffar3/Scn1b/Trpm4/Chrna7/Mef2a/Gnao1/Scn3b/Scn4b/Drd2/Hcn4/Tpm1/Cacna2d2/Gpx1/Scn5a/Trdn/Ctnna3/Srebf1/Map2k3/Cacna1g/Jup/Map2k6/Gaa/Thrb/Stc1/Tmem65/Rbfox2/Pkp2/Rps6ka2/Hbegf/Kcnn2/Nedd4l/Grk2/Slc1a1/Jak2/Flna	56
GO:0008016	BP	GO:0008016	regulation of heart contraction	49/2659	183/23328	7.07645e-09	4.25436e-05	9.641e-07	Ankrd39/Hdac4/Atp2b4/Tnnt2/Cacna1e/Atp1b1/Rgs4/Cacnb2/Strit1/Casq2/Kcnd3/Edn2/Slc9a1/Agrn/Sema3a/Kcnh2/Nos3/Tac1/Kcna5/Sptbn4/Ffar3/Scn1b/Trpm4/Chrna7/Mef2a/Gnao1/Scn3b/Scn4b/Drd2/Hcn4/Tpm1/Cacna2d2/Scn5a/Ctnna3/Srebf1/Cacna1g/Jup/Gaa/Thrb/Stc1/Tmem65/Rbfox2/Pkp2/Hbegf/Kcnn2/Grk2/Slc1a1/Jak2/Flna	49
GO:1905475	BP	GO:1905475	regulation of protein localization to membrane	51/2659	195/23328	8.3382e-09	5.01293e-05	1.09522e-06	Arpc2/Vil1/Pid1/Gpc1/Dpp10/Actr3/Lypd1/Atp2b4/Cnst/Ppp2r5a/Prnp/Ghsr/Tnik/Prkci/Snx27/Camk2d/Musk/Hpca/Ephb2/Ssh1/Fis1/Ptn/Tcaf1/C2cd5/Shisa7/Akt2/Kcnj11/Mesd/Cemip/Hras/Necab2/Ptpn9/Dag1/Epm2a/Camk2b/Sqstm1/Itga3/Vti1b/Numb/Dmtn/Shank3/Cacnb3/Gsk3b/Pdpk1/Mtcl1/Pkdcc/Myo5b/Stx3/Sorbs1/Ogt/Wnk3	51
GO:0001558	BP	GO:0001558	regulation of cell growth	91/2659	438/23328	8.49821e-09	5.10913e-05	1.09522e-06	Sema4c/Serpine2/Bcl2/Actr3/Syt2/Cdc73/Rgs4/Dab2ip/Ino80/Avp/Ncoa3/Zmat3/Sema4a/Sema6c/Creb3/Ncbp1/Plaa/Slc9a1/Sfn/Mad2l2/Clstn1/Slc25a33/Atad3a/Sema3d/Sema3a/Dnajc2/Cgref1/Rasal1/Plxna4/Mtpn/Sema4f/Foxp1/Cpne9/Rerg/Caprin2/Dact3/Ntrk3/Apbb1/Usp47/Syt17/Ddx49/Unc13a/Ppan/Islr2/Smad3/Sema3f/Golga4/Epm2a/Sesn1/Cirbp/Igfbp3/Slit3/Trpv2/Ntn1/Atp5g1/Igfbp4/Krt17/Eif2b2/Gng4/Cdhr2/Sema3g/Cgrrf1/Extl3/Pt…	91
GO:0016051	BP	GO:0016051	carbohydrate biosynthetic process	51/2659	197/23328	1.20604e-08	7.25073e-05	1.48416e-06	Irs1/Per2/Atf3/Sord/B4galt5/Foxo1/Ndst3/Akr1a1/Ppp1cb/Maea/Dgkq/Fam3c/Adcyap1r1/Akt2/Gpi1/Dgat2/Chst15/Insr/Isyna1/Smpd3/Has3/St3gal2/Plcd1/Epm2a/Ranbp2/Cry1/Grb10/Mpdu1/Nr1d1/G6pc3/Mgat2/Hif1a/Pck2/Ptk2b/Ptger4/Pdgfb/Atf4/Ep300/Gpd1/Gbe1/B3galt5/Mas1/Pgp/Ndst1/Ppp1ca/Rbp4/Sorbs1/Rgn/G6pdx/Ogt/Pgk1	51
GO:0070838	BP	GO:0070838	divalent metal ion transport	95/2659	467/23328	1.21386e-08	7.29775e-05	1.48416e-06	Slc39a10/Bcl2/Slc41a1/Atp2b4/Cacna1e/Atp1b1/Rgs4/Nos1ap/Slc30a10/Cacnb2/Slc25a25/Ryr3/Prnp/Slc24a3/Fkbp1a/Chrna4/Oprl1/Trpc3/Strit1/Chrnb2/Casq2/Camk2d/Mcub/Chd7/Creb3/Slc24a2/Hpca/Epb41/Oprd1/Slc9a1/Nipal3/Nos3/Slc30a3/Stim2/Orai2/Adcyap1r1/Itpr1/Cd4/Grin2b/Plcz1/Slc8a2/Ryr1/Trpm4/Chrna7/Cemip/Prkcb/Cacng3/Orai3/Drd4/Saraf/Tusc3/Homer3/Gnao1/Atp2c2/Trpc6/Npsr1/Drd2/Trpc1/Cacna2d2/Ctnnb1/Epm2a/Tr…	95
GO:0072511	BP	GO:0072511	divalent inorganic cation transport	95/2659	470/23328	1.68796e-08	0.00010148	2.01223e-06	Slc39a10/Bcl2/Slc41a1/Atp2b4/Cacna1e/Atp1b1/Rgs4/Nos1ap/Slc30a10/Cacnb2/Slc25a25/Ryr3/Prnp/Slc24a3/Fkbp1a/Chrna4/Oprl1/Trpc3/Strit1/Chrnb2/Casq2/Camk2d/Mcub/Chd7/Creb3/Slc24a2/Hpca/Epb41/Oprd1/Slc9a1/Nipal3/Nos3/Slc30a3/Stim2/Orai2/Adcyap1r1/Itpr1/Cd4/Grin2b/Plcz1/Slc8a2/Ryr1/Trpm4/Chrna7/Cemip/Prkcb/Cacng3/Orai3/Drd4/Saraf/Tusc3/Homer3/Gnao1/Atp2c2/Trpc6/Npsr1/Drd2/Trpc1/Cacna2d2/Ctnnb1/Epm2a/Tr…	95
GO:0042326	BP	GO:0042326	negative regulation of phosphorylation	95/2659	471/23328	1.88203e-08	0.000113148	2.1743e-06	Rnf149/Pid1/Hdac4/Atf3/Ppp2r5a/Dab2ip/Spred1/Chp1/Prnp/Trib3/Pmepa1/Fabp4/Foxo1/Kirrel/C9orf72/Bag1/Shb/Ephb2/Trp73/Zfyve28/Ppef2/Dgkq/Dynll1/Hsph1/Pbp2/Ptpro/Ppp5c/Kirrel2/Vrk3/Ptpn5/Chrna7/Igf1r/Ntrk3/Pde2a/Smpd1/Inpp5f/Sirt3/Insr/Snx25/Cyld/Dbndd1/Chordc1/Sorl1/Drd2/Dusp7/Dag1/Ctdspl/Epm2a/Tnfaip3/Pkib/Adora2a/Adarb1/Gadd45b/Ptprq/Irak3/Ctdsp2/Inpp5j/Igfbp3/Grb10/Spred2/Irf1/Ncor1/Per1/Arrb2/S…	95
GO:0032922	BP	GO:0032922	circadian regulation of gene expression	26/2659	70/23328	1.92752e-08	0.000115882	2.1743e-06	Per2/Top1/Noct/Ciart/Ppp1cb/Ppp1cc/Kdm5a/Bhlhe41/Relb/Arntl/Kdm8/Kmt2a/Drd2/Rora/Cry1/Ncor1/Per1/Nr1d1/Csnk1d/Atf4/Nrip1/Crem/Egr1/Ppp1ca/Maged1/Ogt	26
GO:0018105	BP	GO:0018105	peptidyl-serine phosphorylation	73/2659	331/23328	1.96071e-08	0.000117878	2.1743e-06	Sgk3/Clk1/Bcl2/Mapkapk2/Atp2b4/Akt3/Nek6/Myo3b/Tlk1/Pdk1/Tnks1bp1/Avp/Src/Top1/Prkci/Dclk1/Fnip2/Hipk1/Camk2d/Txn1/Clspn/Oprd1/Mad2l2/Akap9/Cdc7/Dgkq/Lmtk2/Camk1/Caprin2/Sptbn4/Akt2/Vrk3/Chrna7/Ntrk3/Prkcb/Sbk1/Mapk3/Inpp5f/Brsk2/Mast1/Phip/Camkv/Epm2a/Hk1/Csnk1g2/Inpp5j/Camk2b/Mapk9/Arrb2/Ppp1r1b/Ern1/Csnk1d/Drd1/Plk2/Dmtn/Angpt1/Pdgfb/Mapk12/Ppm1f/Eif4g1/Map3k13/Gsk3b/Rps6ka2/Pdpk1/Plcl2/Stk32a…	73
GO:0003012	BP	GO:0003012	muscle system process	85/2659	408/23328	2.29106e-08	0.000137739	2.4829e-06	Ankrd39/Hdac4/Atp2b4/Tnnt2/Atp1b1/Rgs4/Cacnb2/Ptgs1/Ryr3/Fkbp1a/Ghsr/Trpc3/Foxo1/Strit1/Npy2r/Lmna/Chrnb2/Casq2/Kcnd3/Camk2d/Tpm2/Edn2/Slc9a1/Htr1d/Agrn/Kcnh2/Nos3/Gtf2ird2/Mtpn/Ezh2/Foxp1/Oxtr/Kcna5/Kcna1/Ryr1/Scn1b/Trpm4/Abcc8/Mef2a/Akap13/Inpp5f/Npy1r/Bbs2/Smpd3/Scn3b/Scn4b/Drd2/Chrnb4/Hcn4/Smad3/Tpm1/Mlip/Scn5a/Ctnna3/Jsrp1/Map2k3/Akap1/Cacna1g/Jup/Map2k6/Gaa/Dock4/Arg2/Actn2/Jarid2/Drd1/Kcnm…	85
GO:1990138	BP	GO:1990138	neuron projection extension	50/2659	198/23328	3.97847e-08	0.000239186	4.21578e-06	Sema4c/Raph1/Actr3/Syt2/Eif2ak4/Flrt3/Dclk1/Sema4a/Sema6c/C9orf72/Plaa/Sema3d/Sema3a/Rasal1/Auts2/Plxna4/Sema4f/Plxna1/Cpne9/Ntrk3/Syt17/Unc13a/Islr2/Sema3f/Golga4/Ctnnb1/Wasf1/Slit3/Cyfip2/Jade2/Trpv2/Ntn1/Atp5g1/Eif2b2/Vcl/Sema3g/Ep300/Map3k13/Gsk3b/Tiam1/Srf/Ptprs/Pou4f3/Sema6a/Nedd4l/Myo5b/Slit1/Zfyve27/L1cam/Plxna3	50
GO:0034329	BP	GO:0034329	cell junction assembly	87/2659	426/23328	4.10418e-08	0.000246744	4.25445e-06	Cdh20/Bcl2/Actr3/Lamc1/Flrt3/Syndig1/Src/Cdh22/Ghsr/Sema4a/Chrnb2/S100a10/Pip5k1a/Hipk1/Musk/Ptprd/Adgrb2/Col16a1/Ephb2/Wnt4/Clstn1/Agrn/Fzd1/Limch1/Cux2/Ache/Sdk1/Ppp1r9a/Oxtr/Plxnd1/Ptpro/Shank1/Ntrk3/Dchs1/Cldn23/Adgrl1/Cdh8/Kirrel3/Cadm1/Peak1/Smad3/Tpbg/Plxnb1/Ctnnb1/Bcr/Ntn1/Jup/Cntnap1/Fbf1/Lrrn3/Lrfn5/Actn1/Numb/Flrt2/Actn2/Vcl/Ptk2b/Dmtn/Slitrk1/Slitrk6/Cdh12/Cdh18/Adgrb1/Nptxr/Pdgfb/Sha…	87
GO:0006816	BP	GO:0006816	calcium ion transport	86/2659	420/23328	4.33135e-08	0.000260401	4.3944e-06	Bcl2/Atp2b4/Cacna1e/Atp1b1/Rgs4/Nos1ap/Cacnb2/Slc25a25/Ryr3/Prnp/Slc24a3/Fkbp1a/Chrna4/Oprl1/Trpc3/Strit1/Chrnb2/Casq2/Camk2d/Mcub/Chd7/Creb3/Slc24a2/Hpca/Epb41/Oprd1/Slc9a1/Nos3/Stim2/Orai2/Adcyap1r1/Itpr1/Cd4/Grin2b/Plcz1/Slc8a2/Ryr1/Trpm4/Chrna7/Cemip/Prkcb/Cacng3/Orai3/Drd4/Saraf/Homer3/Gnao1/Atp2c2/Trpc6/Npsr1/Drd2/Trpc1/Cacna2d2/Ctnnb1/Epm2a/Trdn/Adora2a/Jsrp1/Camk2b/Stc2/Trpv2/Arrb2/Cacna1…	86
GO:0043547	BP	GO:0043547	positive regulation of GTPase activity	54/2659	222/23328	4.5707e-08	0.000274791	4.54063e-06	Tbc1d8/Dock10/Ngef/Rgs16/Rabgap1l/Rgs4/Rgs7/Chn1/Ralgapa2/Tbc1d20/Ralgapb/S100a10/Pip5k1a/Tbck/Wnt4/Rap1gap/Agrn/Arap2/Cav2/Ezh2/Iqsec3/Akt2/Ntrk3/Rgs10/Hras/Arhgef7/Adprhl1/Gnao1/Ccl17/Tbc1d2b/Plxnb1/Bcr/Prtn3/Tbc1d30/Tbc1d10a/Arhgef15/Sgsm2/Abr/Rundc1/Tbc1d16/Net1/Nedd9/Rgs14/Ptk2b/Sgsm3/Rangap1/Gsk3b/Tiam1/Tiam2/Snx9/Tbc1d5/Arap3/Rasgrp2/Rgn	54
GO:0018209	BP	GO:0018209	peptidyl-serine modification	76/2659	357/23328	4.90417e-08	0.000294839	4.77248e-06	Sgk3/Clk1/Bcl2/Mapkapk2/Atp2b4/Akt3/Ntmt1/Nek6/Galnt13/Myo3b/Tlk1/Pdk1/Tnks1bp1/Avp/Src/Top1/Prkci/Dclk1/Fnip2/Hipk1/Camk2d/Txn1/Clspn/Oprd1/Mad2l2/Akap9/Cdc7/Dgkq/Lmtk2/Camk1/Caprin2/Sptbn4/Akt2/Vrk3/Chrna7/Ntrk3/Prkcb/Sbk1/Mapk3/Inpp5f/Brsk2/Mast1/Phip/Camkv/Epm2a/Hk1/Csnk1g2/Inpp5j/Camk2b/Mapk9/Arrb2/Ppp1r1b/Ern1/Csnk1d/Galnt16/Drd1/Plk2/Dmtn/Angpt1/Pdgfb/Mapk12/Ppm1f/Eif4g1/Map3k13/Gsk3b/Rps6…	76
GO:0010770	BP	GO:0010770	positive regulation of cell morphogenesis involved in differentiation	48/2659	188/23328	5.10811e-08	0.000307099	4.87152e-06	Arpc2/Epha4/Actr3/Skil/Mfn1/S100a10/Ptprd/Ptprf/Fbxw8/Cux2/Ache/Plxna4/Plxna1/Plxnd1/Caprin2/Ntrk3/Islr2/Plxnb1/Golga4/Trak1/Camk2b/Mapk9/Trpv2/Ntn1/Atp5g1/Baiap2/Numb/Eif2b2/Net1/Rreb1/Nedd9/Nefl/Dmtn/Slitrk1/Ep300/Map3k13/Gsk3b/Tiam1/Tiam2/Metrn/Srf/Myo5b/Zfyve27/Cask/L1cam/Flna/Plxna3/Pak3	48
GO:0007623	BP	GO:0007623	circadian rhythm	53/2659	217/23328	5.2483e-08	0.000315528	4.90708e-06	Per2/Top1/Oprl1/Cyp7b1/Noct/Npy2r/Chrnb2/Ciart/Sfpq/Ppp1cb/Ppp1cc/Kcnd2/Ezh2/Kdm5a/Bhlhe41/Relb/Dbp/Ntrk3/Arntl/Kdm8/Drd4/Nr2f6/Kmt2a/Drd2/Rora/Spsb4/Adora2a/Cry1/Mapk9/Srebf1/Ncor1/Per1/Nr1d1/Ddx5/Csnk1d/Cipc/Drd1/Kcnma1/Ptger4/Klf10/Atf4/Ep300/Gsk3b/Nrip1/Fbxl17/Six3/Crem/Egr1/Ppp1ca/Btrc/Maged1/Ogt/Kdm5c	53
GO:0062012	BP	GO:0062012	regulation of small molecule metabolic process	76/2659	358/23328	5.54221e-08	0.000333198	5.08223e-06	Irs1/Pid1/Hdac4/Atp2b4/Lpgat1/Pdk1/Avp/Trib3/Src/Pex2/Ghsr/Foxo1/Coq3/Ttc39b/Ak4/Hpca/Fabp3/Wnt4/Nos3/Insig1/Khk/Ppp1cb/Maea/Slc4a4/Dgkq/Pptc7/Fam3c/Adcyap1r1/Akt2/Dgat2/Insr/Hpgd/Smpd3/Ldlr/Rora/Plcd1/Ranbp2/Zbtb7a/Cry1/Sec14l2/Igfbp3/Grb10/Mapk9/Srebf1/Ncor1/Nr1d1/Igfbp4/Stat3/Sox9/Pomc/Hif1a/Entpd5/Thrb/Kcnma1/Ptk2b/Ptger4/Dgat1/Pdgfb/Ep300/Abcd2/Gpd1/Comt/Clcn2/Zbtb20/Mas1/Pgp/Lmf1/Stard4/Egr…	76
GO:0099003	BP	GO:0099003	vesicle-mediated transport in synapse	60/2659	260/23328	6.49818e-08	0.000390671	5.76835e-06	Syt2/Snap25/Syndig1/Chrna4/Chrnb2/Unc13b/Plaa/Rab3b/Rims3/Hpca/Clstn1/Otof/Nsg1/Usp46/Dgkq/Grm8/Dgki/Syt5/Napa/Grik5/Ppfia3/Chrna7/Apba2/Sh3gl3/Syt9/Syt17/Prkcb/Gsg1l/Ctbp2/Caly/Drd4/Glra3/Rab3a/Unc13a/Drd2/Htr1b/Ctnnb1/Syne1/Adora2a/Slc17a8/Canx/Snap47/Doc2b/Git1/Hap1/Trim9/Numb/Drd1/Fcho2/Ppp3cb/Erc2/Slc18a3/Syt10/Gsk3b/Synj2/Myo5b/Syt12/Stx3/Syp/Cask	60
GO:1903522	BP	GO:1903522	regulation of blood circulation	58/2659	248/23328	6.53237e-08	0.000392726	5.76835e-06	Ankrd39/Per2/Hdac4/Atp2b4/Tnnt2/Cacna1e/Atp1b1/Rgs4/Cacnb2/Ptgs1/Avp/Strit1/Casq2/Kcnd3/Edn2/Slc9a1/Agrn/Sema3a/Kcnh2/Nos3/Tac1/Oxtr/Kcna5/Sptbn4/Ffar3/Scn1b/Trpm4/Chrna7/Mef2a/Npy1r/Gnao1/Scn3b/Scn4b/Drd2/Hcn4/Tpm1/Cacna2d2/Scn5a/Ctnna3/Srebf1/Cacna1g/Jup/Gaa/Dock4/Hif1a/Drd1/Thrb/Stc1/Tmem65/Rbfox2/Pdgfb/Pkp2/Hbegf/Kcnn2/Grk2/Slc1a1/Jak2/Flna	58
GO:0043266	BP	GO:0043266	regulation of potassium ion transport	33/2659	108/23328	6.70309e-08	0.00040299	5.81148e-06	Dpp10/Atp1b1/Rgs4/Rgs7/Lrrc55/Kcnip3/Prnp/Kcns1/Snx27/Casq2/Kcnab2/Agrn/Akap9/Kcnh2/Nos3/Kcnip4/Kcna5/Kcna1/Abcc8/Neto2/Wwp2/Drd2/Akap7/Kcnip1/Actn2/Ptk2b/Kcns2/Atf4/Ano6/Nedd4l/Kcnip2/Flna/Wnk3	33
GO:0001933	BP	GO:0001933	negative regulation of protein phosphorylation	86/2659	425/23328	7.5412e-08	0.000453377	6.42136e-06	Rnf149/Pid1/Atf3/Dab2ip/Spred1/Chp1/Prnp/Trib3/Pmepa1/Fabp4/Foxo1/Kirrel/C9orf72/Bag1/Shb/Ephb2/Trp73/Zfyve28/Ppef2/Dgkq/Hsph1/Pbp2/Ptpro/Ppp5c/Kirrel2/Vrk3/Ptpn5/Chrna7/Igf1r/Ntrk3/Smpd1/Inpp5f/Sirt3/Insr/Snx25/Cyld/Dbndd1/Chordc1/Sorl1/Drd2/Dusp7/Dag1/Ctdspl/Epm2a/Tnfaip3/Pkib/Adora2a/Adarb1/Gadd45b/Ptprq/Irak3/Ctdsp2/Inpp5j/Igfbp3/Spred2/Irf1/Ncor1/Per1/Arrb2/Chmp6/Prkar2b/Wars/Sfrp4/Drd1/Rgs1…	86
GO:1903829	BP	GO:1903829	positive regulation of cellular protein localization	69/2659	317/23328	8.15138e-08	0.000490061	6.81916e-06	Arpc2/Vil1/Dpp10/Actr3/Atp2b4/Cnst/Sec16a/Map1a/Ddrgk1/Prnp/Src/Prkci/Snx27/Gpsm2/Musk/Plk3/Hpca/Epb41/Sfn/Ephb2/Crocc/Ssh1/Fis1/Cav2/Ptn/Tcaf1/Edem1/Camk1/C2cd5/Akt2/Kcnj11/Ptpn5/Mesd/Cemip/Hras/Cyld/Zdhhc1/Necab2/Sorl1/Ptpn9/Tmem30a/Slc35d3/Epb41l2/Sar1a/Sqstm1/Kif3a/Itga3/Jup/Tert/Pinx1/Vps28/Mgat3/Ep300/Cacnb3/Mcrs1/Gsk3b/Pdpk1/Hnrnpm/Washc1/Mtcl1/Myo5b/Chrm1/B3gat3/Stx3/Jak2/Sorbs1/Flna/Ogt/…	69
GO:1905477	BP	GO:1905477	positive regulation of protein localization to membrane	33/2659	109/23328	8.56963e-08	0.000515206	7.04545e-06	Arpc2/Vil1/Dpp10/Actr3/Atp2b4/Cnst/Prnp/Prkci/Snx27/Musk/Hpca/Ephb2/Ssh1/Fis1/Ptn/Tcaf1/C2cd5/Akt2/Kcnj11/Mesd/Cemip/Hras/Necab2/Ptpn9/Sqstm1/Itga3/Cacnb3/Pdpk1/Mtcl1/Myo5b/Stx3/Sorbs1/Wnk3	33
GO:0006836	BP	GO:0006836	neurotransmitter transport	57/2659	245/23328	1.02179e-07	0.000614298	8.25814e-06	Pnkd/Per2/Syt2/Snap25/Chrna4/Chrnb2/Unc13b/Rab3b/Rims3/Otof/Nat8l/Ppp1r9a/Grm8/Dgki/Slc6a6/Slc6a11/Syt5/Napa/Grik5/Kcnc3/Ppfia3/Chrna7/Apba2/Syt9/Syt17/Prkcb/Ctbp2/Drd4/Glra3/Rab3a/Unc13a/Drd2/Htr1b/Adora2a/Slc1a6/Slc17a8/Slc6a15/Lin7a/Snap47/Doc2b/Git1/Trim9/Drd1/Mctp1/Erc2/Slc18a3/Ptger4/Syt10/Gsk3b/Baiap3/Slc29a1/Sncaip/Syt12/Nrxn2/Stx3/Syp/Cask	57
GO:0050433	BP	GO:0050433	regulation of catecholamine secretion	24/2659	66/23328	1.07624e-07	0.000647038	8.55331e-06	Syt2/Ptgs1/Hrh3/Chrna4/Ghsr/Npy2r/Chrnb2/Oxtr/Syt5/Ffar3/Chrna7/Syt9/Syt17/Prkcb/Rab3a/Drd2/Htr1b/Plcd1/Adora2a/Crhr1/Syt10/Pcp4/Grk2/Syt12	24
GO:0051937	BP	GO:0051937	catecholamine transport	28/2659	85/23328	1.11636e-07	0.000671158	8.72671e-06	Syt2/Ptgs1/Hrh3/Chrna4/Ghsr/Npy2r/Chrnb2/Rab3b/Nat8l/Oxtr/Syt5/Ffar3/Chrna7/Syt9/Syt17/Prkcb/Rab3a/Smpd3/Drd2/Htr1b/Plcd1/Adora2a/Crhr1/Drd1/Syt10/Pcp4/Grk2/Syt12	28
GO:1901379	BP	GO:1901379	regulation of potassium ion transmembrane transport	28/2659	86/23328	1.47631e-07	0.000887556	1.13543e-05	Dpp10/Atp1b1/Rgs4/Rgs7/Lrrc55/Kcnip3/Prnp/Kcns1/Snx27/Casq2/Kcnab2/Agrn/Akap9/Kcnh2/Kcnip4/Kcna1/Abcc8/Neto2/Wwp2/Akap7/Kcnip1/Actn2/Kcns2/Ano6/Nedd4l/Kcnip2/Flna/Wnk3	28
GO:0007269	BP	GO:0007269	neurotransmitter secretion	47/2659	189/23328	1.6458e-07	0.000989456	1.22623e-05	Pnkd/Syt2/Snap25/Chrna4/Chrnb2/Unc13b/Rims3/Otof/Ppp1r9a/Grm8/Dgki/Syt5/Napa/Grik5/Kcnc3/Ppfia3/Chrna7/Apba2/Syt9/Syt17/Prkcb/Ctbp2/Drd4/Glra3/Rab3a/Unc13a/Drd2/Htr1b/Adora2a/Lin7a/Snap47/Doc2b/Git1/Trim9/Drd1/Mctp1/Erc2/Ptger4/Syt10/Gsk3b/Baiap3/Sncaip/Syt12/Nrxn2/Stx3/Syp/Cask	47
GO:0099643	BP	GO:0099643	signal release from synapse	47/2659	189/23328	1.6458e-07	0.000989456	1.22623e-05	Pnkd/Syt2/Snap25/Chrna4/Chrnb2/Unc13b/Rims3/Otof/Ppp1r9a/Grm8/Dgki/Syt5/Napa/Grik5/Kcnc3/Ppfia3/Chrna7/Apba2/Syt9/Syt17/Prkcb/Ctbp2/Drd4/Glra3/Rab3a/Unc13a/Drd2/Htr1b/Adora2a/Lin7a/Snap47/Doc2b/Git1/Trim9/Drd1/Mctp1/Erc2/Ptger4/Syt10/Gsk3b/Baiap3/Sncaip/Syt12/Nrxn2/Stx3/Syp/Cask	47
GO:0048588	BP	GO:0048588	developmental cell growth	60/2659	267/23328	1.75313e-07	0.00105398	1.27734e-05	Sema4c/Raph1/Actr3/Syt2/Rgs4/Eif2ak4/Flrt3/Dclk1/Sema4a/Sema6c/Camk2d/C9orf72/Plaa/Sema3d/Sema3a/Rasal1/Auts2/Plxna4/Sema4f/Plxna1/Foxp1/Cpne9/Akap13/Ntrk3/Syt17/Unc13a/Islr2/Sema3f/Golga4/Ctnnb1/Wasf1/Slit3/Cyfip2/Jade2/Trpv2/Ntn1/Atp5g1/Sox9/Eif2b2/Vcl/Sema3g/Col14a1/Ep300/Kmt2d/Map3k13/Gsk3b/Tomm70a/Tiam1/Srf/Ptprs/Pou4f3/Sema6a/Nedd4l/Myo5b/Slit1/Zfyve27/Hdac6/L1cam/Plxna3/G6pdx	60
GO:2000649	BP	GO:2000649	regulation of sodium ion transmembrane transporter activity	21/2659	54/23328	1.76797e-07	0.0010629	1.27734e-05	Hecw2/Atp1b1/Chp1/Camk2d/Ptpn3/Pcsk9/Slc9a1/Agrn/Ywhah/Tesc/Scn1b/Drd4/Neto2/Scn3b/Scn4b/Fxyd2/Fgf11/Glrx/Slmap/Nedd4l/Wnk3	21
GO:0050432	BP	GO:0050432	catecholamine secretion	24/2659	68/23328	2.06373e-07	0.00124071	1.46876e-05	Syt2/Ptgs1/Hrh3/Chrna4/Ghsr/Npy2r/Chrnb2/Oxtr/Syt5/Ffar3/Chrna7/Syt9/Syt17/Prkcb/Rab3a/Drd2/Htr1b/Plcd1/Adora2a/Crhr1/Syt10/Pcp4/Grk2/Syt12	24
GO:0050770	BP	GO:0050770	regulation of axonogenesis	50/2659	208/23328	2.09706e-07	0.00126075	1.47054e-05	Sema4c/Epha4/Actr3/Chn1/Skil/Sema4a/Sema6c/Zswim5/Ephb2/Agrn/Sema3d/Sema3a/Ache/Plxna4/Sema4f/Plxna1/Plxnd1/Ntrk3/Brsk2/Zswim4/Islr2/Sema3f/Plxnb1/Golga4/Trak1/Ust/Trpv2/Ntn1/Atp5g1/Eif2b2/Sema3g/Nefm/Nefl/Slitrk1/Ep300/Map3k13/Gsk3b/Tiam1/Tiam2/Metrn/Srf/Ptprs/Sema6a/Myo5b/Mark2/Slit1/Zfyve27/L1cam/Plxna3/Pak3	50
GO:1902305	BP	GO:1902305	regulation of sodium ion transmembrane transport	23/2659	64/23328	2.52793e-07	0.00151979	1.74699e-05	Hecw2/Atp2b4/Atp1b1/Chp1/Camk2d/Ptpn3/Pcsk9/Slc9a1/Agrn/Ywhah/Tesc/Scn1b/Drd4/Neto2/Scn3b/Scn4b/Fxyd2/Scn5a/Fgf11/Glrx/Slmap/Nedd4l/Wnk3	23
GO:0007015	BP	GO:0007015	actin filament organization	86/2659	437/23328	2.688e-07	0.00161603	1.83107e-05	Arpc2/Vil1/Bcl2/Actr3/Tnnt2/Rgs4/Enah/Fam171a1/Nebl/Src/Ghsr/Prkci/Kirrel/S100a10/Synpo2/C9orf72/Tpm2/Gba2/Cap1/Wasf2/Stmn1/Wnt4/Arhgef10l/Mad2l2/Actr3b/Add1/Limch1/Ssh1/Hip1r/Hip1/Ppp1r9a/Tac1/Mtpn/Brk1/Shank1/Kash5/Fat1/Cotl1/Pstpip1/Smad3/Tpm1/Vill/Xirp1/Arhgap18/Wasf1/Pcdh15/Flii/Gas7/Arhgef15/Rflnb/Myo1d/Samd14/Grb2/Baiap2/Rhob/Actn1/Tgfb3/Actn2/Nedd9/Cap2/Iqgap2/Ptk2b/Rhobtb2/Dmtn/Tpm3-rs7/…	86
GO:0016079	BP	GO:0016079	synaptic vesicle exocytosis	38/2659	141/23328	2.77522e-07	0.00166846	1.86386e-05	Syt2/Snap25/Chrna4/Chrnb2/Unc13b/Rims3/Otof/Grm8/Dgki/Syt5/Napa/Grik5/Ppfia3/Chrna7/Apba2/Syt9/Syt17/Prkcb/Ctbp2/Drd4/Glra3/Rab3a/Unc13a/Drd2/Htr1b/Adora2a/Snap47/Doc2b/Git1/Trim9/Drd1/Erc2/Syt10/Gsk3b/Syt12/Stx3/Syp/Cask	38
GO:0048168	BP	GO:0048168	regulation of neuronal synaptic plasticity	24/2659	69/23328	2.82389e-07	0.00169773	1.87021e-05	Slc4a10/Unc13b/Ncdn/Ephb2/Grin2b/Shisa7/Slc8a2/Ppfia3/Cpeb1/Hras/Rab3a/Unc13a/Kmt2a/Drd2/Camk2b/Drd1/Shank3/Shisa9/Gsk3b/Grik1/Egr1/Kcnn2/Neurl1a/Syp	24
GO:0051056	BP	GO:0051056	regulation of small GTPase mediated signal transduction	60/2659	271/23328	3.0182e-07	0.00181454	1.97152e-05	Arhgef4/Ngef/Ralgps2/Itpkb/Vav2/Dab2ip/Chn1/Ralgapa2/Src/Ralgapb/Camk2d/Ssx2ip/Arhgef39/Abca1/Stmn1/Ephb2/Rap1gap/Arhgef10l/Rasal1/Auts2/Sh2b2/Dgki/Adcyap1r1/Fgd5/Iqsec3/Arhgdib/Sipa1l3/Akap13/Arhgef17/Hras/Arhgef7/Mcf2l/Rasa3/Sipa1l2/Dennd4a/Bnip2/Arhgap18/Bcr/Arhgef25/Obscn/Arhgef15/Abr/Git1/Itga3/Timp2/Sos2/Net1/Ripor2/Rasgrf2/Arhgef28/Spata13/Fgd4/Lztr1/Tiam1/Tiam2/Arap3/Arhgap19/Arhgef9/Star…	60
GO:0071375	BP	GO:0071375	cellular response to peptide hormone stimulus	57/2659	253/23328	3.21831e-07	0.00193485	2.07382e-05	Irs1/Pid1/Inhbb/Akt3/Slc30a10/Mbd5/Trib3/Src/Ghsr/Prkci/Foxo1/Rpe65/Leprot/Pcsk9/Ptprf/Slc9a1/Slc25a33/Insig1/Cpeb2/Sh2b2/Cav2/C2cd5/Akt2/Ffar3/Igf1r/Cpeb1/Prkcb/Ptpre/Insr/Sesn3/Sorl1/Cyp11a1/Phip/Ctnnb1/Osbpl8/Grb10/Irf1/Srebf1/Socs7/Stat5a/Stat3/Crhr1/Grb2/Hdac9/Actn2/Gkap1/Pck2/Rangap1/Adcy6/Gsk3b/Pdpk1/Lpin2/Grk2/Jak2/Sorbs1/Ogt/Irs4	57
GO:0030048	BP	GO:0030048	actin filament-based movement	35/2659	126/23328	3.67431e-07	0.00220899	2.33609e-05	Vil1/Tnnt2/Cacnb2/Strit1/Casq2/Kcnd3/Camk2d/Wasf2/Kcnh2/Limch1/Wipf3/Kcna5/Scn1b/Trpm4/Apbb1/Parva/Scn3b/Scn4b/Hcn4/Tpm1/Scn5a/Myrip/Ctnna3/Myo1d/Cacna1g/Wipf2/Jup/Frmd6/Ccdc88c/Stc1/Pkp2/Kcnn2/Nedd4l/Myo5b/Flna	35
GO:0051952	BP	GO:0051952	regulation of amine transport	33/2659	116/23328	4.30623e-07	0.00258891	2.70183e-05	Per2/Syt2/Rgs4/Ptgs1/Avp/Hrh3/Chrna4/Ghsr/Npy2r/Chrnb2/Rab3b/Nat8l/Oxtr/Grin2b/Syt5/Ffar3/Chrna7/Syt9/Syt17/Prkcb/Npy5r/Rab3a/Drd2/Htr1b/Plcd1/Adora2a/Crhr1/Arg2/Syt10/Grik1/Pcp4/Grk2/Syt12	33
GO:0106027	BP	GO:0106027	neuron projection organization	31/2659	106/23328	4.89928e-07	0.00294545	3.034e-05	Epha4/Dock10/Ngef/Actr3/Zfp804a/Map1a/Lzts3/Prnp/Mfn1/Ephb2/Cux2/Ppp1r9a/Grin2b/Caprin2/Arhgap33/Shank1/Chrna7/Igf1r/Insr/Zfp365/Camk2b/Itga3/Baiap2/Shank3/Abcd2/Gsk3b/Tiam1/Myo5b/Hdac6/Cask/Pak3	31
GO:0001505	BP	GO:0001505	regulation of neurotransmitter levels	57/2659	257/23328	5.55595e-07	0.00334024	3.39655e-05	Pnkd/Per2/Syt2/Snap25/Hrh3/Chrna4/Chrnb2/Unc13b/Rab3b/Rims3/Otof/Nat8l/Ache/Ppp1r9a/Grm8/Dgki/Slc6a11/Syt5/Napa/Grik5/Kcnc3/Ppfia3/Chrna7/Apba2/Syt9/Syt17/Prkcb/Ctbp2/Drd4/Glra3/Rab3a/Unc13a/Drd2/Htr1b/Adora2a/Slc1a6/Lin7a/Snap47/Doc2b/Git1/Trim9/Drd1/Agtpbp1/Mctp1/Erc2/Ptger4/Syt10/Comt/Gsk3b/Baiap3/Slc29a1/Sncaip/Syt12/Nrxn2/Stx3/Syp/Cask	57
GO:0007416	BP	GO:0007416	synapse assembly	46/2659	191/23328	5.95956e-07	0.00358289	3.59718e-05	Actr3/Flrt3/Syndig1/Ghsr/Sema4a/Chrnb2/Musk/Ptprd/Adgrb2/Ephb2/Clstn1/Agrn/Fzd1/Cux2/Ache/Sdk1/Ppp1r9a/Oxtr/Plxnd1/Shank1/Ntrk3/Adgrl1/Kirrel3/Cadm1/Tpbg/Plxnb1/Ntn1/Lrrn3/Lrfn5/Numb/Flrt2/Slitrk1/Slitrk6/Adgrb1/Nptxr/Pdgfb/Shank3/Eif4g1/Gsk3b/Ptprs/Pcdhb16/Nrxn2/Slitrk4/Slitrk2/Arhgef9/Efnb1	46
GO:0006898	BP	GO:0006898	receptor-mediated endocytosis	54/2659	240/23328	6.78703e-07	0.00408036	4.04543e-05	Dgkd/Snap25/Slc9b2/Clta/Sgip1/Pcsk9/Cap1/Rspo1/Hpca/Snx17/Lrpap1/Usp46/Grk3/Ankrd13a/Hip1r/Hip1/Ache/Cav2/Wdr54/Ptpn5/Sh3gl3/Cacng3/Gsg1l/Inpp5f/Caly/Drd4/Insr/Fcho1/Necab2/Ldlr/Sorl1/Drd2/Htr1b/Dnajc13/Syne1/Wasf1/Canx/Kif3a/Arrb2/Unc119/Hap1/Cacng5/Grb2/Numb/Amn/Sfrp4/Cltb/Fcho2/Gtf2h2/Angpt1/Snx9/Tbc1d5/Ankrd13d/Grk2	54
GO:0051963	BP	GO:0051963	regulation of synapse assembly	34/2659	124/23328	7.46376e-07	0.00448721	4.39387e-05	Actr3/Flrt3/Syndig1/Ghsr/Sema4a/Chrnb2/Musk/Ptprd/Adgrb2/Ephb2/Clstn1/Agrn/Fzd1/Cux2/Ppp1r9a/Oxtr/Ntrk3/Adgrl1/Tpbg/Ntn1/Lrrn3/Lrfn5/Numb/Flrt2/Slitrk1/Slitrk6/Adgrb1/Nptxr/Eif4g1/Gsk3b/Ptprs/Slitrk4/Slitrk2/Arhgef9	34
GO:1901653	BP	GO:1901653	cellular response to peptide	63/2659	299/23328	9.64178e-07	0.00579664	5.60684e-05	Epha4/Irs1/Pid1/Inhbb/Akt3/Slc30a10/Mbd5/Prnp/Trib3/Src/Ghsr/Prkci/Foxo1/Rpe65/Leprot/Pcsk9/Ptprf/Slc9a1/Slc25a33/Insig1/Cpeb2/Sh2b2/Fis1/Cav2/C2cd5/Akt2/Ffar3/Igf1r/Cpeb1/Prkcb/Ptpre/Insr/Nod2/Smpd3/Sesn3/Sorl1/Cyp11a1/Phip/Ctnnb1/Osbpl8/Grb10/Irf1/Srebf1/Socs7/Stat5a/Stat3/Crhr1/Grb2/Hdac9/Actn2/Gkap1/Pck2/Rangap1/Adcy6/Gsk3b/Pdpk1/Ddx11/Lpin2/Grk2/Jak2/Sorbs1/Ogt/Irs4	63
GO:0070252	BP	GO:0070252	actin-mediated cell contraction	28/2659	94/23328	1.1464e-06	0.00689218	6.58619e-05	Vil1/Tnnt2/Cacnb2/Strit1/Casq2/Kcnd3/Camk2d/Kcnh2/Limch1/Kcna5/Scn1b/Trpm4/Parva/Scn3b/Scn4b/Hcn4/Tpm1/Scn5a/Ctnna3/Cacna1g/Jup/Frmd6/Ccdc88c/Stc1/Pkp2/Kcnn2/Nedd4l/Flna	28
GO:0086001	BP	GO:0086001	cardiac muscle cell action potential	20/2659	55/23328	1.22065e-06	0.00733853	6.90581e-05	Cacnb2/Kcnd3/Camk2d/Kcnh2/Kcnd2/Kcna5/Scn1b/Trpm4/Scn3b/Scn4b/Hcn4/Scn5a/Ctnna3/Cacna1g/Jup/Slmap/Pkp2/Kcnn2/Nedd4l/Flna	20
GO:0015837	BP	GO:0015837	amine transport	33/2659	121/23328	1.231e-06	0.00740079	6.90581e-05	Per2/Syt2/Rgs4/Ptgs1/Avp/Hrh3/Chrna4/Ghsr/Npy2r/Chrnb2/Rab3b/Nat8l/Oxtr/Grin2b/Syt5/Ffar3/Chrna7/Syt9/Syt17/Prkcb/Npy5r/Rab3a/Drd2/Htr1b/Plcd1/Adora2a/Crhr1/Arg2/Syt10/Grik1/Pcp4/Grk2/Syt12	33
GO:0098657	BP	GO:0098657	import into cell	55/2659	251/23328	1.29929e-06	0.00781134	7.20415e-05	Slc9a2/Slc39a10/Per2/Atp1b1/Rgs4/Kcnj9/Kcnj3/Slc12a6/Slc27a2/Prnp/Snap25/Kcnd3/Slc24a2/Rab3b/Hpca/Fabp3/Slc9a1/Kcnh2/Nat8l/Usp46/Iscu/Slc6a6/Slc6a11/Slc8a2/Akt2/Trpm4/Kcnj11/Cacng3/Gsg1l/Caly/Drd4/Slc9a5/Smpd3/Drd2/Hcn4/Slc9a9/Scn5a/Syne1/Slc19a1/Slc1a6/Hcn2/Slc39a5/Trpv2/Slc46a1/Hap1/Cacng5/Numb/Slc7a8/Kcnk9/Vps28/Slc29a1/Slc1a1/Acsl5/Slc9a7/Wnk3	55
GO:0097060	CC	GO:0097060	synaptic membrane	128/2671	470/23271	2.30208e-21	1.62527e-18	1.20677e-18	Sema4c/Epha4/Atp2b4/Cacna1e/Kcnj9/Rgs7/Kcnj3/Rapsn/Kcna4/Snap25/Flrt3/Syndig1/Snph/Epb41l1/Chrna4/Ghsr/Nbea/Glrb/Chrnb2/Kcnd3/Unc13b/Clta/Musk/Ptprd/Ptprf/Rims3/Oprd1/Ephb2/Usp48/Clstn1/Gabrd/Akap9/Otof/Nsg1/Kctd8/Gabra4/Hip1r/Hip1/Ache/Kcnd2/Grm8/Dgki/Sema4f/Slc6a6/Itpr1/Slc6a11/Iqsec3/Kcna1/Grin2b/Ptpro/Shisa7/Slc8a2/Grik5/Shank1/Kcnc3/Ptpn5/Chrna7/Ntrk3/Dlg2/Pde2a/Apbb1/Cacng3/Gsg1l/Drd4/Glra3…	128
GO:0098984	CC	GO:0098984	neuron to neuron synapse	112/2671	433/23271	4.8043e-17	3.39184e-14	1.25923e-14	Sema4c/Epha4/Rps6kc1/Kcna4/Map1a/Lzts3/Prnp/Flrt3/Syndig1/Epb41l1/Src/Dclk1/Snx27/Kcnd3/Penk/Unc13b/Ptprd/Ptprf/Epb41/Oprd1/Clstn1/Kcnab2/Akap9/Rheb/Slc30a3/Add1/Hip1r/Ppp1r9a/Kcnd2/Dgki/Itpr1/Camk1/Iqsec3/Grin2b/Ptpro/Shisa7/Slc8a2/Grik5/Shank1/Chrna7/Cpeb1/Sh3gl3/Dlg2/Syt9/Cacng3/Gsg1l/Adgra1/Homer3/Dnajb1/Adgrl1/Neto2/Egln1/Arhgap32/Nrgn/Cadm1/Drd2/Ctnnb1/Grm1/Akap7/Bcr/Adora2a/Anks1b/Slc16a7/…	112
GO:0034702	CC	GO:0034702	ion channel complex	85/2671	296/23271	4.23401e-16	2.98921e-13	7.39837e-14	Kcnb2/Dpp10/Cacna1e/Nos1ap/Kcnk2/Cacnb2/Ptpa/Kcnj3/Scn3a/Lrrc55/Kcna4/Ryr3/Kcnip3/Snap25/Kcns1/Chrna4/Trpc3/Glrb/Chrnb2/Kcnd3/Olfm3/Mcub/Kcnab2/Gabrd/Kcnh2/Kcnip4/Gabra4/Lrrc8b/Lrrc8c/Lrrc8d/Kcnd2/Ano2/Kcna5/Kcna1/Grin2b/Calm3/Grik5/Ryr1/Catsperg1/Scn1b/Shank1/Kcnc3/Trpm4/Kcnj11/Abcc8/Chrna7/Dlg2/Cacng3/Glra3/Kcng4/Trpc6/Olfm2/Scn3b/Scn4b/Chrnb4/Hcn4/Trpc1/Cacna2d2/Scn5a/Scn11a/Trdn/Hcn2/Vwc2/Kcn…	85
GO:0034703	CC	GO:0034703	cation channel complex	70/2671	222/23271	8.96979e-16	6.33267e-13	1.13473e-13	Kcnb2/Dpp10/Cacna1e/Nos1ap/Kcnk2/Cacnb2/Ptpa/Kcnj3/Scn3a/Lrrc55/Kcna4/Ryr3/Kcnip3/Snap25/Kcns1/Trpc3/Kcnd3/Olfm3/Mcub/Kcnab2/Kcnh2/Kcnip4/Kcnd2/Kcna5/Kcna1/Grin2b/Calm3/Grik5/Ryr1/Catsperg1/Scn1b/Shank1/Kcnc3/Trpm4/Kcnj11/Abcc8/Dlg2/Cacng3/Kcng4/Trpc6/Olfm2/Scn3b/Scn4b/Hcn4/Trpc1/Cacna2d2/Scn5a/Scn11a/Trdn/Hcn2/Vwc2/Kcnip1/Cacna1g/Atp5g1/Cacng5/Hspa2/Calm1/Abhd6/Kcnma1/Ptk2b/Kcns2/Kcnv1/Kcnq3/Cac…	70
GO:0032279	CC	GO:0032279	asymmetric synapse	104/2671	405/23271	1.08232e-15	7.6412e-13	1.13473e-13	Sema4c/Epha4/Rps6kc1/Kcna4/Map1a/Lzts3/Prnp/Flrt3/Syndig1/Epb41l1/Src/Dclk1/Snx27/Kcnd3/Ptprf/Epb41/Oprd1/Clstn1/Kcnab2/Akap9/Rheb/Add1/Hip1r/Ppp1r9a/Kcnd2/Dgki/Itpr1/Camk1/Iqsec3/Grin2b/Ptpro/Shisa7/Slc8a2/Grik5/Shank1/Chrna7/Cpeb1/Sh3gl3/Dlg2/Cacng3/Gsg1l/Adgra1/Homer3/Dnajb1/Adgrl1/Neto2/Egln1/Arhgap32/Nrgn/Cadm1/Drd2/Ctnnb1/Grm1/Bcr/Adora2a/Anks1b/Slc16a7/Nefh/Camk2b/Snap47/Arrb2/Abr/Samd14/S…	104
GO:1902495	CC	GO:1902495	transmembrane transporter complex	87/2671	312/23271	1.32776e-15	9.37398e-13	1.16004e-13	Kcnb2/Dpp10/Cacna1e/Atp1b1/Nos1ap/Kcnk2/Cacnb2/Ptpa/Kcnj3/Scn3a/Lrrc55/Kcna4/Ryr3/Kcnip3/Snap25/Kcns1/Chrna4/Trpc3/Glrb/Chrnb2/Kcnd3/Olfm3/Mcub/Slc9a1/Kcnab2/Gabrd/Kcnh2/Kcnip4/Gabra4/Lrrc8b/Lrrc8c/Lrrc8d/Kcnd2/Ano2/Kcna5/Kcna1/Grin2b/Calm3/Grik5/Ryr1/Catsperg1/Scn1b/Shank1/Kcnc3/Trpm4/Kcnj11/Abcc8/Chrna7/Dlg2/Cacng3/Glra3/Kcng4/Trpc6/Olfm2/Scn3b/Scn4b/Chrnb4/Hcn4/Trpc1/Cacna2d2/Scn5a/Scn11a/Trdn…	87
GO:1990351	CC	GO:1990351	transporter complex	88/2671	319/23271	1.84725e-15	1.30416e-12	1.23943e-13	Kcnb2/Dpp10/Cacna1e/Atp1b1/Nos1ap/Kcnk2/Cacnb2/Ptpa/Kcnj3/Scn3a/Timm10/Lrrc55/Kcna4/Ryr3/Kcnip3/Snap25/Kcns1/Chrna4/Trpc3/Glrb/Chrnb2/Kcnd3/Olfm3/Mcub/Slc9a1/Kcnab2/Gabrd/Kcnh2/Kcnip4/Gabra4/Lrrc8b/Lrrc8c/Lrrc8d/Kcnd2/Ano2/Kcna5/Kcna1/Grin2b/Calm3/Grik5/Ryr1/Catsperg1/Scn1b/Shank1/Kcnc3/Trpm4/Kcnj11/Abcc8/Chrna7/Dlg2/Cacng3/Glra3/Kcng4/Trpc6/Olfm2/Scn3b/Scn4b/Chrnb4/Hcn4/Trpc1/Cacna2d2/Scn5a/Scn1…	88
GO:0045211	CC	GO:0045211	postsynaptic membrane	90/2671	330/23271	1.89151e-15	1.3354e-12	1.23943e-13	Sema4c/Epha4/Cacna1e/Rgs7/Rapsn/Kcna4/Flrt3/Syndig1/Chrna4/Nbea/Glrb/Chrnb2/Kcnd3/Musk/Ptprf/Oprd1/Ephb2/Usp48/Clstn1/Gabrd/Akap9/Nsg1/Kctd8/Gabra4/Hip1/Ache/Kcnd2/Dgki/Sema4f/Slc6a6/Slc6a11/Iqsec3/Kcna1/Grin2b/Ptpro/Shisa7/Slc8a2/Grik5/Shank1/Kcnc3/Chrna7/Ntrk3/Dlg2/Apbb1/Cacng3/Gsg1l/Drd4/Glra3/Nrgn/Cadm1/Drd2/Chrnb4/Grm2/Dag1/Ctnnb1/Syne1/Grm1/Adora2a/Slc1a6/Lin7a/Slc16a7/Canx/Arrb2/Akap1/Cacn…	90
GO:0014069	CC	GO:0014069	postsynaptic density	102/2671	400/23271	3.35556e-15	2.36903e-12	1.95447e-13	Sema4c/Epha4/Rps6kc1/Map1a/Lzts3/Prnp/Flrt3/Syndig1/Epb41l1/Src/Dclk1/Snx27/Kcnd3/Ptprf/Epb41/Oprd1/Clstn1/Kcnab2/Akap9/Rheb/Add1/Hip1r/Ppp1r9a/Kcnd2/Dgki/Itpr1/Camk1/Iqsec3/Grin2b/Ptpro/Shisa7/Slc8a2/Grik5/Shank1/Chrna7/Cpeb1/Sh3gl3/Dlg2/Cacng3/Gsg1l/Adgra1/Homer3/Dnajb1/Adgrl1/Neto2/Egln1/Arhgap32/Nrgn/Cadm1/Drd2/Ctnnb1/Grm1/Bcr/Adora2a/Anks1b/Slc16a7/Nefh/Camk2b/Snap47/Arrb2/Abr/Samd14/Stat3/C…	102
GO:0099572	CC	GO:0099572	postsynaptic specialization	108/2671	439/23271	7.19914e-15	5.0826e-12	3.77387e-13	Sema4c/Epha4/Rps6kc1/Rapsn/Map1a/Lzts3/Prnp/Flrt3/Syndig1/Epb41l1/Src/Chrna4/Dclk1/Chrnb2/Snx27/Kcnd3/Ptprf/Epb41/Oprd1/Clstn1/Kcnab2/Akap9/Rheb/Add1/Gabra4/Hip1r/Ppp1r9a/Kcnd2/Dgki/Itpr1/Camk1/Iqsec3/Grin2b/Ptpro/Shisa7/Slc8a2/Grik5/Shank1/Chrna7/Cpeb1/Sh3gl3/Dlg2/Cacng3/Gsg1l/Adgra1/Dlgap2/Glra3/Homer3/Dnajb1/Adgrl1/Neto2/Egln1/Arhgap32/Nrgn/Cadm1/Drd2/Ctnnb1/Grm1/Bcr/Adora2a/Anks1b/Slc16a7/Nef…	108
GO:0042734	CC	GO:0042734	presynaptic membrane	63/2671	198/23271	1.51911e-14	1.07249e-11	7.23941e-13	Epha4/Atp2b4/Cacna1e/Kcnj9/Kcnj3/Kcna4/Snap25/Snph/Chrna4/Chrnb2/Unc13b/Clta/Ptprd/Rims3/Oprd1/Ephb2/Otof/Hip1/Ache/Grm8/Dgki/Slc6a11/Kcna1/Grin2b/Grik5/Kcnc3/Chrna7/Pde2a/Apbb1/Drd4/Unc13a/Adgrl1/Cadm1/Drd2/Htr1b/Grm2/Scn11a/Ctnnb1/Grm1/Adora2a/Slc1a6/Canx/Flot2/Cntnap1/Drd1/Cltb/Fcho2/Rgs7bp/Kcnma1/Erc2/Kctd12/Grik1/Ptprs/Kctd16/Nrxn2/Chrm1/Stx3/Syp/Cask/Gria3/Atp2b3/L1cam/Efnb1	63
GO:0099240	CC	GO:0099240	intrinsic component of synaptic membrane	68/2671	244/23271	1.71282e-12	1.20925e-09	7.4823e-11	Epha4/Atp2b4/Cacna1e/Kcnj9/Kcnj3/Kcna4/Snap25/Flrt3/Chrna4/Ghsr/Chrnb2/Kcnd3/Ptprd/Ptprf/Oprd1/Ephb2/Clstn1/Gabrd/Gabra4/Kcnd2/Grm8/Slc6a6/Slc6a11/Kcna1/Grin2b/Ptpro/Shisa7/Slc8a2/Grik5/Kcnc3/Chrna7/Ntrk3/Dlg2/Cacng3/Gsg1l/Drd4/Glra3/Adgrl1/Cadm1/Drd2/Htr1b/Grm2/Scn11a/Grm1/Adora2a/Slc1a6/Slc16a7/Canx/Flot2/Cacng5/Slc16a3/Lrfn5/Drd1/Rgs7bp/Abhd6/Kcnma1/Slitrk1/Adgrb1/Shisa9/Grik1/Lrfn2/Ptprs/Dcc/…	68
GO:0099699	CC	GO:0099699	integral component of synaptic membrane	64/2671	226/23271	3.5368e-12	2.49698e-09	1.2974e-10	Epha4/Atp2b4/Cacna1e/Kcnj9/Kcnj3/Kcna4/Flrt3/Chrna4/Ghsr/Chrnb2/Kcnd3/Ptprd/Ptprf/Oprd1/Ephb2/Clstn1/Gabrd/Gabra4/Kcnd2/Grm8/Slc6a6/Slc6a11/Kcna1/Grin2b/Ptpro/Shisa7/Slc8a2/Grik5/Kcnc3/Chrna7/Ntrk3/Cacng3/Gsg1l/Drd4/Glra3/Adgrl1/Cadm1/Drd2/Htr1b/Grm2/Scn11a/Grm1/Adora2a/Slc1a6/Slc16a7/Canx/Cacng5/Slc16a3/Lrfn5/Drd1/Abhd6/Kcnma1/Slitrk1/Adgrb1/Shisa9/Grik1/Lrfn2/Ptprs/Dcc/Chrm1/Gria3/Slitrk2/Atp2b…	64
GO:0034705	CC	GO:0034705	potassium channel complex	36/2671	90/23271	3.66922e-12	2.59047e-09	1.2974e-10	Kcnb2/Dpp10/Nos1ap/Kcnk2/Kcnj3/Lrrc55/Kcna4/Kcnip3/Snap25/Kcns1/Kcnd3/Kcnab2/Kcnh2/Kcnip4/Kcnd2/Kcna5/Kcna1/Calm3/Grik5/Kcnc3/Kcnj11/Abcc8/Dlg2/Kcng4/Hcn4/Hcn2/Kcnip1/Calm1/Kcnma1/Kcns2/Kcnv1/Kcnq3/Grik1/Kcng2/Kcnk4/Kcnip2	36
GO:0044309	CC	GO:0044309	neuron spine	59/2671	200/23271	3.79568e-12	2.67975e-09	1.2974e-10	Arpc2/Epha4/Dock10/Zfp804a/Kcna4/Lzts3/Syndig1/Kcnd3/Hpca/Oprd1/Fbxo2/Clstn1/Add1/Grk3/Ppp1cc/Hip1r/Ppp1r9a/Kcnd2/Dgki/Grin2b/Ptpro/Slc8a2/Strn4/Arhgap33/Shank1/Chrna7/Apba2/Apbb1/Rgs10/Drd4/Dlgap2/Dnajb1/Nrgn/Drd2/Syne1/Grm1/Canx/Arrb2/Ppp1r1b/Nr1d1/Baiap2/Prkar2b/Actn1/Drd1/Rgs14/Rgs7bp/Ptk2b/Shank3/Comt/Gsk3b/Tiam1/Kcnn2/Myo5b/Ppp1ca/Grk2/Slc1a1/Neurl1a/Syp/Gria3	59
GO:0043197	CC	GO:0043197	dendritic spine	58/2671	195/23271	3.95993e-12	2.79571e-09	1.2974e-10	Arpc2/Epha4/Dock10/Zfp804a/Kcna4/Lzts3/Syndig1/Kcnd3/Hpca/Oprd1/Fbxo2/Clstn1/Add1/Grk3/Ppp1cc/Hip1r/Ppp1r9a/Kcnd2/Dgki/Grin2b/Ptpro/Slc8a2/Strn4/Arhgap33/Shank1/Chrna7/Apba2/Apbb1/Rgs10/Drd4/Dlgap2/Dnajb1/Nrgn/Drd2/Syne1/Grm1/Canx/Arrb2/Ppp1r1b/Nr1d1/Baiap2/Prkar2b/Actn1/Drd1/Rgs14/Rgs7bp/Ptk2b/Shank3/Comt/Gsk3b/Tiam1/Kcnn2/Myo5b/Ppp1ca/Grk2/Slc1a1/Neurl1a/Gria3	58
GO:0098936	CC	GO:0098936	intrinsic component of postsynaptic membrane	53/2671	178/23271	3.15599e-11	2.22813e-08	9.73177e-10	Epha4/Cacna1e/Kcna4/Flrt3/Chrna4/Chrnb2/Kcnd3/Ptprf/Oprd1/Ephb2/Clstn1/Gabrd/Gabra4/Kcnd2/Slc6a6/Slc6a11/Kcna1/Grin2b/Ptpro/Shisa7/Slc8a2/Grik5/Kcnc3/Chrna7/Ntrk3/Dlg2/Cacng3/Gsg1l/Drd4/Glra3/Cadm1/Drd2/Grm2/Grm1/Adora2a/Slc1a6/Slc16a7/Canx/Cacng5/Slc16a3/Lrfn5/Drd1/Rgs7bp/Abhd6/Slitrk1/Adgrb1/Shisa9/Lrfn2/Ptprs/Dcc/Chrm1/Gria3/Slitrk2	53
GO:0099055	CC	GO:0099055	integral component of postsynaptic membrane	51/2671	169/23271	4.2865e-11	3.02627e-08	1.24835e-09	Epha4/Cacna1e/Kcna4/Flrt3/Chrna4/Chrnb2/Kcnd3/Ptprf/Oprd1/Ephb2/Clstn1/Gabrd/Gabra4/Kcnd2/Slc6a6/Slc6a11/Kcna1/Grin2b/Ptpro/Shisa7/Slc8a2/Grik5/Kcnc3/Chrna7/Ntrk3/Cacng3/Gsg1l/Drd4/Glra3/Cadm1/Drd2/Grm2/Grm1/Adora2a/Slc1a6/Slc16a7/Canx/Cacng5/Slc16a3/Lrfn5/Drd1/Abhd6/Slitrk1/Adgrb1/Shisa9/Lrfn2/Ptprs/Dcc/Chrm1/Gria3/Slitrk2	51
GO:0008076	CC	GO:0008076	voltage-gated potassium channel complex	31/2671	78/23271	1.38177e-10	9.75527e-08	3.8123e-09	Kcnb2/Dpp10/Nos1ap/Kcnk2/Kcnj3/Lrrc55/Kcna4/Kcnip3/Snap25/Kcns1/Kcnd3/Kcnab2/Kcnh2/Kcnip4/Kcnd2/Kcna5/Kcna1/Calm3/Kcnc3/Dlg2/Kcng4/Hcn4/Hcn2/Kcnip1/Calm1/Kcnma1/Kcns2/Kcnv1/Kcnq3/Kcng2/Kcnip2	31
GO:0150034	CC	GO:0150034	distal axon	87/2671	384/23271	3.01424e-10	2.12805e-07	7.90048e-09	Arpc2/Epha4/Kcnk2/Slc4a10/Zfp804a/Kcnip3/Prnp/Lamp5/Snap25/Flrt3/Fkbp1a/Penk/C9orf72/Unc13b/Ror1/Ptprf/Oprd1/Kcnab2/Agrn/Ssh1/Auts2/Orai2/Lmtk2/Ppp1r9a/Dgki/Kcna1/Fkbp4/Grin2b/Slc8a2/Calm3/Grik5/Kcnc3/Chrna7/Cpeb1/Apbb1/Prkcb/Rgs10/Drd4/Brsk2/Arhgef7/Rab3a/Unc13a/Adgrl1/Katnb1/Cdh8/Atp6v0d1/Drd2/Hcn4/Htr1b/Trak1/Slc17a8/Nts/Dctn2/Inpp5j/Trpv2/Git1/Itga3/Atp5g1/Pnmt/Hap1/Hdac5/Timp2/Calm1/Klc1/Drd…	87
GO:0070382	CC	GO:0070382	exocytic vesicle	63/2671	261/23271	6.47224e-09	4.5694e-06	1.61563e-07	Sema4c/Syt2/Stx6/Snap25/Syndig1/Slc9b2/Penk/Rab2a/Unc13b/Clta/Rab3b/Oprd1/Otof/Slc30a3/Atp8a1/Cttnbp2/Dgki/Grin2b/Syt5/Clcn4/Calm3/Abcc8/Ptpn5/Apba2/Vps33b/Dlg2/Rab6a/Syt9/Syt17/Npy1r/Rab3a/Unc13a/Atp6v0d1/Kirrel3/Cadm1/Drd2/Rab27a/Akap7/Slc17a8/Snap47/Rab40b/Trim9/Vti1b/Calm1/Cltb/Mctp1/Scamp1/Rab3c/Synpr/Vdac2/Slc18a3/Mal2/Kcnk9/Syt10/Rab26/Atp6v1g2/Ptprs/Dpysl3/Syt12/Stx3/Clcn5/Syp/Sytl5	63
GO:0030658	CC	GO:0030658	transport vesicle membrane	42/2671	147/23271	1.30413e-08	9.20715e-06	3.10745e-07	Sema4c/Syt2/Stx6/Sec16a/Syndig1/Slc9b2/Rab2a/Unc13b/Clta/Rab3b/Pef1/Oprd1/Otof/Slc30a3/Atp8a1/Syt5/Calm3/Abcc8/Dlg2/Syt9/Rab3a/Unc13a/Nrgn/Drd2/Sar1a/Slc17a8/Snap47/Gosr2/Vti1b/Calm1/Clba1/Cltb/Mctp1/Scamp1/Rab3c/Synpr/Slc18a3/Mal2/Rab26/Atp6v1g2/Ptprs/Syp	42
GO:0030133	CC	GO:0030133	transport vesicle	75/2671	339/23271	1.4689e-08	1.03704e-05	3.34788e-07	Sema4c/Syt2/Stx6/Cnst/Sec16a/Chp1/Snap25/Syndig1/Slc9b2/Penk/Rab2a/Unc13b/Clta/Yipf1/Rab3b/Pef1/Oprd1/Otof/Slc30a3/Fgfr3/Atp8a1/Cav2/Cttnbp2/Dgki/Grin2b/Syt5/Clcn4/Calm3/Abcc8/Ptpn5/Apba2/Vps33b/Dlg2/Rab6a/Syt9/Syt17/Npy1r/Rab3a/Unc13a/Atp6v0d1/Yipf2/Kirrel3/Nrgn/Cadm1/Drd2/Rab27a/Akap7/Sar1a/Slc17a8/Snap47/Gosr2/Rab40b/Trim9/Vti1b/Calm1/Clba1/Cltb/Mctp1/Scamp1/Rab3c/Synpr/Vdac2/Slc18a3/Mal2/Kcnk…	75
GO:0098889	CC	GO:0098889	intrinsic component of presynaptic membrane	38/2671	128/23271	2.03026e-08	1.43337e-05	4.43453e-07	Epha4/Atp2b4/Cacna1e/Kcnj9/Kcnj3/Kcna4/Snap25/Chrna4/Chrnb2/Ptprd/Oprd1/Ephb2/Grm8/Slc6a11/Kcna1/Grin2b/Grik5/Kcnc3/Chrna7/Drd4/Adgrl1/Cadm1/Drd2/Htr1b/Scn11a/Adora2a/Slc1a6/Canx/Flot2/Drd1/Rgs7bp/Kcnma1/Grik1/Ptprs/Chrm1/Gria3/Atp2b3/Efnb1	38
GO:0098685	CC	GO:0098685	Schaffer collateral - CA1 synapse	35/2671	113/23271	2.19972e-08	1.553e-05	4.61246e-07	Epha4/Ghsr/Prkci/Ptprd/Dgki/Itpr1/Shank1/Apba2/Apbb1/Cacng3/Gsg1l/Cadm1/Ctnnb1/Akap12/Grm1/Bcr/Anks1b/Slc16a7/Nefh/Abr/Stat3/Baiap2/Dgkb/Nefl/Gsk3b/Csnk2b/Lrfn2/Ptprs/Dcc/Myo5b/Chrm1/Stx3/Syp/Cask/L1cam	35
GO:0030672	CC	GO:0030672	synaptic vesicle membrane	35/2671	116/23271	4.61379e-08	3.25734e-05	8.63785e-07	Sema4c/Syt2/Stx6/Syndig1/Slc9b2/Rab2a/Unc13b/Clta/Rab3b/Oprd1/Otof/Slc30a3/Atp8a1/Syt5/Calm3/Abcc8/Dlg2/Syt9/Rab3a/Unc13a/Drd2/Slc17a8/Snap47/Calm1/Cltb/Mctp1/Scamp1/Rab3c/Synpr/Slc18a3/Mal2/Rab26/Atp6v1g2/Ptprs/Syp	35
GO:0099056	CC	GO:0099056	integral component of presynaptic membrane	35/2671	116/23271	4.61379e-08	3.25734e-05	8.63785e-07	Epha4/Atp2b4/Cacna1e/Kcnj9/Kcnj3/Kcna4/Chrna4/Chrnb2/Ptprd/Oprd1/Ephb2/Grm8/Slc6a11/Kcna1/Grin2b/Grik5/Kcnc3/Chrna7/Drd4/Adgrl1/Cadm1/Drd2/Htr1b/Scn11a/Adora2a/Slc1a6/Canx/Drd1/Kcnma1/Grik1/Ptprs/Chrm1/Gria3/Atp2b3/Efnb1	35
GO:0099501	CC	GO:0099501	exocytic vesicle membrane	35/2671	116/23271	4.61379e-08	3.25734e-05	8.63785e-07	Sema4c/Syt2/Stx6/Syndig1/Slc9b2/Rab2a/Unc13b/Clta/Rab3b/Oprd1/Otof/Slc30a3/Atp8a1/Syt5/Calm3/Abcc8/Dlg2/Syt9/Rab3a/Unc13a/Drd2/Slc17a8/Snap47/Calm1/Cltb/Mctp1/Scamp1/Rab3c/Synpr/Slc18a3/Mal2/Rab26/Atp6v1g2/Ptprs/Syp	35
GO:0008021	CC	GO:0008021	synaptic vesicle	56/2671	239/23271	1.28998e-07	9.10727e-05	2.3318e-06	Sema4c/Syt2/Stx6/Snap25/Syndig1/Slc9b2/Penk/Rab2a/Unc13b/Clta/Rab3b/Oprd1/Otof/Slc30a3/Atp8a1/Cttnbp2/Dgki/Grin2b/Syt5/Clcn4/Calm3/Abcc8/Ptpn5/Apba2/Vps33b/Dlg2/Syt9/Npy1r/Rab3a/Unc13a/Atp6v0d1/Kirrel3/Cadm1/Drd2/Slc17a8/Snap47/Rab40b/Trim9/Vti1b/Calm1/Cltb/Mctp1/Scamp1/Rab3c/Synpr/Vdac2/Slc18a3/Mal2/Kcnk9/Rab26/Atp6v1g2/Ptprs/Syt12/Stx3/Clcn5/Syp	56
GO:0044306	CC	GO:0044306	neuron projection terminus	51/2671	213/23271	2.25753e-07	0.000159382	3.94474e-06	Arpc2/Epha4/Kcnk2/Slc4a10/Kcnip3/Prnp/Flrt3/Fkbp1a/Penk/Unc13b/Ror1/Oprd1/Kcnab2/Dgki/Kcna1/Grin2b/Slc8a2/Grik5/Kcnc3/Prkcb/Rgs10/Drd4/Mob2/Rab3a/Unc13a/Cdh8/Atp6v0d1/Drd2/Ptpn9/Hcn4/Htr1b/Slc17a8/Nts/Git1/Pnmt/Hap1/Baiap2/Drd1/Kcnma1/Erc2/Slc18a3/Ptger4/Grik1/Synj2/Chrm1/Stx3/Slc1a1/Syp/Elk1/Gria3/L1cam	51
GO:0043204	CC	GO:0043204	perikaryon	38/2671	140/23271	2.71728e-07	0.00019184	4.59493e-06	Arpc2/Resp18/Epha4/Pam/Cacna1e/Ckmt1/Pcsk2/Top1/Penk/C9orf72/Ncdn/Hpca/Ppp5c/Grik5/Ptpn5/Drd2/Cyp11a1/Pcmt1/Epm2a/Slc17a8/Nefh/Camk2b/Mapk9/Pnmt/Ntsr2/Ngb/Rgs7bp/Nefm/Mcrs1/Clcn2/Pde10a/Pdpk1/Pde9a/Ppp1ca/Slc1a1/Neurl1a/Hdac6/Gria3	38
GO:0012506	CC	GO:0012506	vesicle membrane	75/2671	363/23271	2.80849e-07	0.000198279	4.60075e-06	Sema4c/Mreg/Pam/Zp3r/Syt2/Stx6/Sec16a/Ryr3/Slc4a11/Lamp5/Syndig1/Slc9b2/Rab2a/Unc13b/Clta/Sgip1/Rab3b/Pef1/Oprd1/Nos3/Otof/Slc30a3/Atp8a1/Dgkq/Kdelr2/Cav2/Ccdc136/Itpr1/C2cd5/Syt5/Ap2s1/Calm3/Ryr1/Abcc8/Cemip/Dlg2/Syt9/Drd4/Rab3a/Unc13a/Nrgn/Drd2/Rab27a/Tmed3/Copb2/Myrip/Sar1a/Slc17a8/Tmem198b/Sparc/Snap47/Flot2/Tmem199/Gosr2/Grb2/Vti1b/Actn1/Calm1/Clba1/Cltb/Mctp1/Scamp1/Rab3c/Synpr/Slc18a3/Mal2…	75
GO:0043198	CC	GO:0043198	dendritic shaft	24/2671	69/23271	3.21342e-07	0.000226867	5.10457e-06	Arpc2/Epha4/Zfp804a/Kcna4/Map1a/Syndig1/Kirrel/Grk3/Chrna7/Kirrel3/Ctnnb1/Hcn2/Inpp5j/Baiap2/Ntsr2/Prkar2b/Drd1/Rgs7bp/Jph4/Gsk3b/Grk2/Slc1a1/Gria3/Flna	24
GO:0043679	CC	GO:0043679	axon terminus	47/2671	192/23271	3.32654e-07	0.000234854	5.12884e-06	Arpc2/Epha4/Kcnk2/Slc4a10/Kcnip3/Prnp/Flrt3/Fkbp1a/Penk/Unc13b/Ror1/Oprd1/Kcnab2/Dgki/Kcna1/Grin2b/Slc8a2/Grik5/Kcnc3/Prkcb/Rgs10/Drd4/Rab3a/Unc13a/Cdh8/Atp6v0d1/Drd2/Hcn4/Htr1b/Slc17a8/Nts/Git1/Pnmt/Hap1/Drd1/Kcnma1/Erc2/Slc18a3/Grik1/Synj2/Chrm1/Stx3/Slc1a1/Syp/Elk1/Gria3/L1cam	47
GO:0098982	CC	GO:0098982	GABA-ergic synapse	31/2671	105/23271	4.53077e-07	0.000319872	6.78593e-06	Cacna1e/Glrb/Kcnd3/Clstn1/Gabrd/Ctbp1/Gabra4/Kcnd2/Grm8/Slc6a6/Itpr1/Slc6a11/Iqsec3/Ptpro/Ctbp2/Drd4/Arhgef7/Glra3/Drd2/Dag1/Git1/Hap1/Lrfn5/Drd1/Abhd6/Erc2/Slitrk1/Baiap3/Slitrk2/Atp2b3/Arhgef9	31
GO:0099634	CC	GO:0099634	postsynaptic specialization membrane	36/2671	136/23271	1.0676e-06	0.000753722	1.55457e-05	Rapsn/Syndig1/Chrna4/Chrnb2/Kcnd3/Ptprf/Oprd1/Clstn1/Akap9/Gabra4/Kcnd2/Dgki/Grin2b/Ptpro/Shisa7/Grik5/Chrna7/Dlg2/Cacng3/Gsg1l/Glra3/Grm1/Slc16a7/Cacng5/Slc16a3/Lrfn5/Actn2/Rgs7bp/Slitrk1/Shisa9/Tiam1/Lrfn2/Ptprs/Dcc/Chrm1/Gria3	36
GO:0030659	CC	GO:0030659	cytoplasmic vesicle membrane	69/2671	337/23271	1.16579e-06	0.000823048	1.65167e-05	Sema4c/Mreg/Pam/Zp3r/Syt2/Stx6/Sec16a/Ryr3/Lamp5/Syndig1/Slc9b2/Rab2a/Unc13b/Clta/Sgip1/Rab3b/Pef1/Oprd1/Otof/Slc30a3/Atp8a1/Kdelr2/Cav2/Ccdc136/Itpr1/C2cd5/Syt5/Ap2s1/Calm3/Ryr1/Abcc8/Cemip/Dlg2/Syt9/Rab3a/Unc13a/Nrgn/Drd2/Rab27a/Tmed3/Copb2/Myrip/Sar1a/Slc17a8/Sparc/Snap47/Flot2/Tmem199/Gosr2/Vti1b/Actn1/Calm1/Clba1/Cltb/Mctp1/Scamp1/Rab3c/Synpr/Slc18a3/Mal2/Enthd1/Aqp5/Snx9/Rab26/Atp6v1g2/Tbc1…	69
GO:0030055	CC	GO:0030055	cell-substrate junction	42/2671	174/23271	2.02967e-06	0.00143295	2.79993e-05	Arpc2/Actr3/Enah/Flrt3/Synpo2/Nexn/Focad/Fblim1/Abcb4/Mtf2/Cav2/Alkbh6/Parva/Mapk3/Tgfb1i1/Arhgef7/Cib2/Peak1/Itga11/Tln2/Dag1/Xirp1/Tle2/Git1/Grb7/Tns4/Actn1/Flrt2/Itgb8/Actn2/Pdlim7/Vcl/Ptk2b/Itgbl1/Adgrb1/Itgb7/Itga5/Arl2/Pgm5/Jak2/Sorbs1/Col17a1	42
GO:0015629	CC	GO:0015629	actin cytoskeleton	92/2671	497/23271	2.31242e-06	0.00163257	3.10819e-05	Arpc2/Vil1/Hdac4/Actr3/Lad1/Tnnt2/Enah/Arhgap21/Myo3b/Vps16/Snap25/Actl10/Myh7b/Src/Cttnbp2nl/Synpo2/Trmt10a/Nexn/Tpm2/Ror1/Lurap1/Cap1/Epb41/Crocc/Fblim1/Abcb4/Actr3b/Maea/Add1/Ablim2/Limch1/Auts2/Sh2b2/Ppp1r9a/Cttnbp2/Mtpn/Dennd2a/Wipf3/Sptbn4/Sipa1l3/Akap13/Tlnrd1/Parva/Prkcb/Cotl1/Arhgap32/Cib2/Pstpip1/Peak1/Tpm1/Vill/Xirp1/Myrip/Ackr2/Epb41l2/Ppp1r12a/Dctn2/Flii/Gas7/Rflnb/Flot2/Myo1d/Acaca/…	92
GO:0014704	CC	GO:0014704	intercalated disc	21/2671	62/23271	2.82937e-06	0.00199753	3.70796e-05	Atp1b1/Camk2d/Slc9a1/Ywhah/Kcna5/Sptbn4/Scn1b/Kcnj11/Scn4b/Tln2/Scn5a/Xirp1/Ctnnb1/Ctnna3/Obscn/Jup/Actn1/Vcl/Tmem65/Pkp2/Pgm5	21
GO:0045121	CC	GO:0045121	membrane raft	74/2671	379/23271	3.11186e-06	0.00219697	3.9787e-05	Irs1/Gpc1/Rgs16/Atp1b1/Nos1ap/Rgs7/Prnp/Snap25/Src/Ghsr/Kirrel/Chrnb2/S100a10/Kcnd3/Abca1/Oprd1/Slc9a1/Usp48/Nos3/Add1/Grk3/Scarb1/Cav2/Kcnd2/Adcyap1r1/Itpr1/Cd4/Kcna5/Chrna7/Igf1r/Pde2a/Mapk3/Insr/Tradd/Ldlr/Trpc1/Dag1/Plcd1/Scn5a/Ctnnb1/Hk1/Prtn3/Rtn4rl1/Flot2/Myo1d/Cavin1/Cys1/Prkar2b/Drd1/Ptch1/Adcy2/Vcl/Vdac2/Kcnma1/Gja3/Ptk2b/Angpt1/Mal2/Kcnq3/Adcy6/Faim2/Gsk3b/Hspa1a/Dcc/Grk2/Ahnak/Jak2/So…	74
GO:0098857	CC	GO:0098857	membrane microdomain	74/2671	380/23271	3.43764e-06	0.00242698	4.29059e-05	Irs1/Gpc1/Rgs16/Atp1b1/Nos1ap/Rgs7/Prnp/Snap25/Src/Ghsr/Kirrel/Chrnb2/S100a10/Kcnd3/Abca1/Oprd1/Slc9a1/Usp48/Nos3/Add1/Grk3/Scarb1/Cav2/Kcnd2/Adcyap1r1/Itpr1/Cd4/Kcna5/Chrna7/Igf1r/Pde2a/Mapk3/Insr/Tradd/Ldlr/Trpc1/Dag1/Plcd1/Scn5a/Ctnnb1/Hk1/Prtn3/Rtn4rl1/Flot2/Myo1d/Cavin1/Cys1/Prkar2b/Drd1/Ptch1/Adcy2/Vcl/Vdac2/Kcnma1/Gja3/Ptk2b/Angpt1/Mal2/Kcnq3/Adcy6/Faim2/Gsk3b/Hspa1a/Dcc/Grk2/Ahnak/Jak2/So…	74
GO:0005925	CC	GO:0005925	focal adhesion	39/2671	161/23271	4.22342e-06	0.00298174	5.14875e-05	Arpc2/Enah/Flrt3/Synpo2/Nexn/Focad/Fblim1/Abcb4/Mtf2/Cav2/Alkbh6/Parva/Mapk3/Tgfb1i1/Arhgef7/Peak1/Itga11/Tln2/Dag1/Xirp1/Tle2/Git1/Grb7/Tns4/Actn1/Flrt2/Itgb8/Actn2/Pdlim7/Vcl/Ptk2b/Itgbl1/Adgrb1/Itgb7/Itga5/Arl2/Pgm5/Jak2/Sorbs1	39
GO:0098589	CC	GO:0098589	membrane region	75/2671	393/23271	6.34311e-06	0.00447823	7.5571e-05	Irs1/Gpc1/Zp3r/Rgs16/Atp1b1/Nos1ap/Rgs7/Prnp/Snap25/Src/Ghsr/Kirrel/Chrnb2/S100a10/Kcnd3/Abca1/Oprd1/Slc9a1/Usp48/Nos3/Add1/Grk3/Scarb1/Cav2/Kcnd2/Adcyap1r1/Itpr1/Cd4/Kcna5/Chrna7/Igf1r/Pde2a/Mapk3/Insr/Tradd/Ldlr/Trpc1/Dag1/Plcd1/Scn5a/Ctnnb1/Hk1/Prtn3/Rtn4rl1/Flot2/Myo1d/Cavin1/Cys1/Prkar2b/Drd1/Ptch1/Adcy2/Vcl/Vdac2/Kcnma1/Gja3/Ptk2b/Angpt1/Mal2/Kcnq3/Adcy6/Faim2/Gsk3b/Hspa1a/Dcc/Grk2/Ahnak/Ja…	75
GO:0031252	CC	GO:0031252	cell leading edge	75/2671	395/23271	7.65307e-06	0.00540307	8.91515e-05	Sntg1/Raph1/Arpc2/Vil1/Actr3/Enah/Arhgap1/Lamp5/Snap25/Src/Prkci/Pip5k1a/Ssx2ip/Hpca/Oprd1/Wasf2/Ldb2/Gabra4/Ssh1/Tesc/Hip1r/Sh2b2/Ppp1r9a/Brk1/Plxnd1/C2cd5/Shisa7/Akt2/Kcnc3/Kcnj11/Chrna7/Apbb1/Parva/Insr/Arhgef7/Mcf2l/Fat1/Amotl1/Tln2/Dag1/Ctnnb1/Arhgap18/Wasf1/Ctnna3/Adora2a/Hcn2/Inpp5j/Wwc1/Trpv2/Gas7/Flot2/Myo1d/Nme1/Sh3yl1/Actn1/Ripor2/Pdlim7/Iqgap2/Spata13/Ptk2b/Atf4/Itga5/Shisa9/Fgd4/Acap…	75
GO:0098839	CC	GO:0098839	postsynaptic density membrane	27/2671	97/23271	8.3324e-06	0.00588267	9.4955e-05	Syndig1/Ptprf/Oprd1/Clstn1/Akap9/Dgki/Grin2b/Ptpro/Grik5/Dlg2/Cacng3/Gsg1l/Grm1/Slc16a7/Cacng5/Slc16a3/Lrfn5/Actn2/Rgs7bp/Slitrk1/Shisa9/Tiam1/Lrfn2/Ptprs/Dcc/Chrm1/Gria3	27
GO:0060076	CC	GO:0060076	excitatory synapse	23/2671	77/23271	1.07589e-05	0.00759576	0.000119998	Actr3/Kcnj9/Kcnj3/Syndig1/Ptprf/Elfn1/Dgki/Grin2b/Shisa7/Shank1/Cacng3/Unc13a/Ntm/Slc1a6/Slc17a8/Slc16a7/Itga3/Baiap2/Slc16a3/Shank3/Syp/Gria3/Atp2b3	23
GO:0005912	CC	GO:0005912	adherens junction	34/2671	138/23271	1.15148e-05	0.00812948	0.000125754	Cdh20/Nectin4/Tnks1bp1/Cdh22/Ssx2ip/Add1/Oxtr/Sptbn4/Dchs1/Plekha7/Cdh8/Ddx6/Dag1/Xirp1/Ctnnb1/Ctnna3/Lin7a/Flot2/Jup/Pdlim7/Vcl/Lmo7/Cdh12/Cdh18/Mtss1/Rnd1/Pkp2/Arvcf/Jcad/Mpp7/Ppp1ca/Pgm5/Sorbs1/Wnk3	34
GO:0060589	MF	GO:0060589	nucleoside-triphosphatase regulator activity	82/2659	298/22669	6.42748e-14	7.1088e-11	3.06797e-11	Rgs20/Bag2/Tbc1d8/Rgs16/Rabgap1l/Atp1b1/Rgs4/Rgs7/Arhgap21/Gpsm1/Dab2ip/Chn1/Arhgap1/Ralgapa2/Tbc1d20/Ralgapb/Fnip2/Gpsm2/Tbck/Bag1/Rgs3/Rap1gap/Arhgef10l/Agrn/Krit1/Agap3/Dnajb6/Cpeb2/Arap2/Rasal1/Agfg2/Hsph1/Dgki/Chn2/Arhgdib/Sipa1l3/Arhgap33/Rab6a/Rgs10/Adprhl1/Rasa3/Rab3a/Arhgap10/Dnajb1/Arl2bp/Sipa1l2/Arhgap32/Arhgap20/Elmod1/Tbc1d2b/Arhgap18/Ranbp2/Bcr/Ric8b/Tbc1d30/Srgap1/Tbc1d10a/Arhgef15…	82
GO:0005261	MF	GO:0005261	cation channel activity	87/2659	327/22669	9.1451e-14	1.01145e-10	3.06797e-11	Kcnb2/Asic4/Cacna1e/Kcnj9/Kcnk2/Cacnb2/Kcnj3/Scn3a/Lrrc55/Kcna4/Ryr3/Kcnip3/Slc4a11/Snap25/Slc24a3/Kcns1/Chrna4/Trpc3/Kcnn3/Chrnb2/Kcnd3/Slc24a2/Kcnab2/Kcnh2/Kcnip4/Stim2/Hvcn1/Orai2/Kcnd2/Itpr1/Kcna5/Kcna1/Grin2b/Grik5/Ryr1/Kcnk6/Scn1b/Kcnc3/Trpm4/Kcnj11/Abcc8/Chrna7/Cacng3/Orai3/Rasa3/Kcnu1/Kcnn1/Cngb1/Kcng4/Trpc6/Scn3b/Scn4b/Chrnb4/Hcn4/Htr1b/Trpc1/Cacna2d2/Scn5a/Scn11a/Ano10/Hcn2/Kcnip1/Trpv2…	87
GO:0015267	MF	GO:0015267	channel activity	110/2659	461/22669	1.54749e-13	1.71153e-10	3.06797e-11	Kcnb2/Asic4/Bcl2/Cacna1e/Kcnj9/Kcnk2/Cacnb2/Kcnj3/Scn3a/Lrrc55/Kcna4/Ano3/Ryr3/Kcnip3/Slc4a11/Snap25/Slc24a3/Kcns1/Chrna4/Trpc3/Glrb/Kcnn3/Chrnb2/Kcnd3/Slc24a2/Gjb3/Kcnab2/Gabrd/Kcnh2/Mpv17/Kcnip4/Stim2/Gabra4/Tmem150c/Lrrc8b/Lrrc8c/Lrrc8d/Hvcn1/Orai2/Kcnd2/Itpr1/Ano2/Kcna5/Kcna1/Grin2b/Clcn4/Grik5/Ryr1/Kcnk6/Scn1b/Kcnc3/Trpm4/Kcnj11/Abcc8/Chrna7/Aqp11/Cacng3/Orai3/Rasa3/Kcnu1/Glra3/Kcnn1/Cngb1/K…	110
GO:0022803	MF	GO:0022803	passive transmembrane transporter activity	110/2659	461/22669	1.54749e-13	1.71153e-10	3.06797e-11	Kcnb2/Asic4/Bcl2/Cacna1e/Kcnj9/Kcnk2/Cacnb2/Kcnj3/Scn3a/Lrrc55/Kcna4/Ano3/Ryr3/Kcnip3/Slc4a11/Snap25/Slc24a3/Kcns1/Chrna4/Trpc3/Glrb/Kcnn3/Chrnb2/Kcnd3/Slc24a2/Gjb3/Kcnab2/Gabrd/Kcnh2/Mpv17/Kcnip4/Stim2/Gabra4/Tmem150c/Lrrc8b/Lrrc8c/Lrrc8d/Hvcn1/Orai2/Kcnd2/Itpr1/Ano2/Kcna5/Kcna1/Grin2b/Clcn4/Grik5/Ryr1/Kcnk6/Scn1b/Kcnc3/Trpm4/Kcnj11/Abcc8/Chrna7/Aqp11/Cacng3/Orai3/Rasa3/Kcnu1/Glra3/Kcnn1/Cngb1/K…	110
GO:0005216	MF	GO:0005216	ion channel activity	103/2659	421/22669	1.74525e-13	1.93025e-10	3.06797e-11	Kcnb2/Asic4/Cacna1e/Kcnj9/Kcnk2/Cacnb2/Kcnj3/Scn3a/Lrrc55/Kcna4/Ano3/Ryr3/Kcnip3/Slc4a11/Snap25/Slc24a3/Kcns1/Chrna4/Trpc3/Glrb/Kcnn3/Chrnb2/Kcnd3/Slc24a2/Kcnab2/Gabrd/Kcnh2/Kcnip4/Stim2/Gabra4/Tmem150c/Lrrc8b/Lrrc8c/Lrrc8d/Hvcn1/Orai2/Kcnd2/Itpr1/Ano2/Kcna5/Kcna1/Grin2b/Clcn4/Grik5/Ryr1/Kcnk6/Scn1b/Kcnc3/Trpm4/Kcnj11/Abcc8/Chrna7/Cacng3/Orai3/Rasa3/Kcnu1/Glra3/Kcnn1/Cngb1/Kcng4/Trpc6/Scn3b/Scn4b…	103
GO:0046873	MF	GO:0046873	metal ion transmembrane transporter activity	103/2659	426/22669	3.85138e-13	4.25962e-10	5.64193e-11	Kcnb2/Slc9a2/Slc39a10/Asic4/Slc41a1/Atp2b4/Cacna1e/Atp1b1/Kcnj9/Slc30a10/Kcnk2/Cacnb2/Kcnj3/Slc4a10/Scn3a/Lrrc55/Kcna4/Slc12a6/Ryr3/Kcnip3/Slc4a11/Snap25/Slc24a3/Kcns1/Trpc3/Kcnn3/Kcnd3/Slc9b2/Slc24a2/Slc9a1/Nipal3/Kcnab2/Kcnh2/Slc30a3/Kcnip4/Stim2/Slc4a4/Orai2/Kcnd2/Slc6a6/Itpr1/Slc6a11/Kcna5/Kcna1/Grin2b/Slc8a2/Grik5/Ryr1/Kcnk6/Scn1b/Kcnc3/Trpm4/Kcnj11/Abcc8/Cacng3/Orai3/Rasa3/Kcnu1/Tusc3/Kcnn1…	103
GO:0005244	MF	GO:0005244	voltage-gated ion channel activity	59/2659	190/22669	8.47446e-13	9.37275e-10	9.13434e-11	Kcnb2/Cacna1e/Kcnj9/Kcnk2/Cacnb2/Kcnj3/Scn3a/Lrrc55/Kcna4/Kcnip3/Snap25/Kcns1/Kcnd3/Kcnab2/Kcnh2/Kcnip4/Hvcn1/Kcnd2/Kcna5/Kcna1/Grin2b/Clcn4/Ryr1/Scn1b/Kcnc3/Trpm4/Kcnj11/Cacng3/Kcnu1/Kcng4/Scn3b/Scn4b/Hcn4/Htr1b/Cacna2d2/Scn5a/Scn11a/Hcn2/Kcnip1/Cacna1g/Kcnh4/Cacng5/Vdac2/Kcnma1/Ptk2b/Kcns2/Kcnv1/Kcnq3/Kcnk9/Ano6/Cacnb3/Kcnh3/Clcn2/Grik1/Kcnh8/Kcng2/Kcnk4/Kcnip2/Clcn5	59
GO:0022832	MF	GO:0022832	voltage-gated channel activity	59/2659	190/22669	8.47446e-13	9.37275e-10	9.13434e-11	Kcnb2/Cacna1e/Kcnj9/Kcnk2/Cacnb2/Kcnj3/Scn3a/Lrrc55/Kcna4/Kcnip3/Snap25/Kcns1/Kcnd3/Kcnab2/Kcnh2/Kcnip4/Hvcn1/Kcnd2/Kcna5/Kcna1/Grin2b/Clcn4/Ryr1/Scn1b/Kcnc3/Trpm4/Kcnj11/Cacng3/Kcnu1/Kcng4/Scn3b/Scn4b/Hcn4/Htr1b/Cacna2d2/Scn5a/Scn11a/Hcn2/Kcnip1/Cacna1g/Kcnh4/Cacng5/Vdac2/Kcnma1/Ptk2b/Kcns2/Kcnv1/Kcnq3/Kcnk9/Ano6/Cacnb3/Kcnh3/Clcn2/Grik1/Kcnh8/Kcng2/Kcnk4/Kcnip2/Clcn5	59
GO:0022836	MF	GO:0022836	gated channel activity	84/2659	323/22669	9.35313e-13	1.03446e-09	9.13434e-11	Kcnb2/Asic4/Cacna1e/Kcnj9/Kcnk2/Cacnb2/Kcnj3/Scn3a/Lrrc55/Kcna4/Ryr3/Kcnip3/Snap25/Kcns1/Chrna4/Trpc3/Glrb/Kcnn3/Chrnb2/Kcnd3/Kcnab2/Gabrd/Kcnh2/Kcnip4/Gabra4/Tmem150c/Hvcn1/Kcnd2/Itpr1/Ano2/Kcna5/Kcna1/Grin2b/Clcn4/Grik5/Ryr1/Scn1b/Kcnc3/Trpm4/Kcnj11/Chrna7/Cacng3/Rasa3/Kcnu1/Glra3/Kcnn1/Cngb1/Kcng4/Scn3b/Scn4b/Chrnb4/Hcn4/Htr1b/Cacna2d2/Scn5a/Scn11a/Ano10/Hcn2/Kcnip1/P2rx5/Cacna1g/Atp5g1/Kcnh4/…	84
GO:0015079	MF	GO:0015079	potassium ion transmembrane transporter activity	51/2659	156/22669	3.37794e-12	3.736e-09	2.96903e-10	Kcnb2/Slc9a2/Atp1b1/Kcnj9/Kcnk2/Kcnj3/Lrrc55/Kcna4/Slc12a6/Kcnip3/Snap25/Slc24a3/Kcns1/Kcnn3/Kcnd3/Slc24a2/Slc9a1/Kcnab2/Kcnh2/Kcnip4/Kcnd2/Kcna5/Kcna1/Grik5/Kcnk6/Kcnc3/Kcnj11/Abcc8/Kcnu1/Kcnn1/Slc9a5/Kcng4/Hcn4/Slc9a9/Hcn2/Kcnip1/Kcnh4/Slc24a4/Kcnma1/Kcns2/Kcnv1/Kcnq3/Kcnk9/Kcnh3/Grik1/Kcnh8/Kcnn2/Kcng2/Kcnk4/Kcnip2/Slc9a7	51
GO:0030695	MF	GO:0030695	GTPase regulator activity	70/2659	258/22669	8.87219e-12	9.81264e-09	7.08926e-10	Rgs20/Tbc1d8/Rgs16/Rabgap1l/Rgs4/Rgs7/Arhgap21/Gpsm1/Dab2ip/Chn1/Arhgap1/Ralgapa2/Tbc1d20/Ralgapb/Gpsm2/Tbck/Rgs3/Rap1gap/Arhgef10l/Krit1/Agap3/Cpeb2/Arap2/Rasal1/Agfg2/Dgki/Chn2/Arhgdib/Sipa1l3/Arhgap33/Rgs10/Adprhl1/Rasa3/Arhgap10/Arl2bp/Sipa1l2/Arhgap32/Arhgap20/Elmod1/Tbc1d2b/Arhgap18/Ranbp2/Bcr/Ric8b/Tbc1d30/Srgap1/Tbc1d10a/Arhgef15/Sgsm2/Abr/Git1/Rundc1/Tbc1d16/Dock4/Rgs14/Iqgap2/Sgsm3/Rang…	70
GO:0042578	MF	GO:0042578	phosphoric ester hydrolase activity	86/2659	357/22669	4.11562e-11	4.55188e-08	3.01451e-09	Eya1/Sgpp2/Dusp28/Ptpn7/Ppp2r5a/Pfkfb3/Sec16a/Gpcpd1/Samhd1/Pde7a/Noct/Pdp1/Rngtt/Plppr1/Ptpn3/Ptprd/Ptprf/Ptp4a2/Smpdl3b/Plch2/Napepld/Ppm1g/Ppp1cb/Ppef2/Plcxd1/Ssh1/Ppp1cc/Pptc7/Ppm1k/Dusp11/Ptpro/Plcz1/Ppp5c/Timm50/Ptpn5/Gdpd5/Pde2a/Smpd1/Gde1/Inpp5f/Lhpp/Ptpre/Smpd3/Ptpn9/Nt5e/Dusp7/Ctdspl/Plcd1/Epm2a/Fig4/Pald1/Plppr3/Ptprq/Ppp1r12a/Ppm1h/Ctdsp2/Inpp5j/Dusp18/Mtmr3/Ublcp1/Nt5m/Ctdnep1/Ppm1d/…	86
GO:0005267	MF	GO:0005267	potassium channel activity	41/2659	120/22669	9.25762e-11	1.02389e-07	6.2592e-09	Kcnb2/Kcnj9/Kcnk2/Kcnj3/Lrrc55/Kcna4/Kcnip3/Snap25/Kcns1/Kcnn3/Kcnd3/Kcnab2/Kcnh2/Kcnip4/Kcnd2/Kcna5/Kcna1/Grik5/Kcnk6/Kcnc3/Kcnj11/Abcc8/Kcnu1/Kcnn1/Kcng4/Hcn4/Hcn2/Kcnip1/Kcnh4/Kcnma1/Kcns2/Kcnv1/Kcnq3/Kcnk9/Kcnh3/Grik1/Kcnh8/Kcnn2/Kcng2/Kcnk4/Kcnip2	41
GO:0005096	MF	GO:0005096	GTPase activator activity	64/2659	238/22669	1.03001e-10	1.13919e-07	6.46662e-09	Rgs20/Tbc1d8/Rgs16/Rabgap1l/Rgs4/Rgs7/Arhgap21/Dab2ip/Chn1/Arhgap1/Ralgapa2/Tbc1d20/Ralgapb/Tbck/Rgs3/Rap1gap/Arhgef10l/Agap3/Arap2/Rasal1/Agfg2/Chn2/Arhgdib/Sipa1l3/Arhgap33/Rgs10/Adprhl1/Rasa3/Arhgap10/Sipa1l2/Arhgap32/Arhgap20/Elmod1/Tbc1d2b/Arhgap18/Ranbp2/Bcr/Ric8b/Tbc1d30/Srgap1/Tbc1d10a/Arhgef15/Sgsm2/Abr/Git1/Rundc1/Tbc1d16/Dock4/Rgs14/Iqgap2/Sgsm3/Rangap1/Arfgap3/Racgap1/Acap2/Tiam2/Taga…	64
GO:0016791	MF	GO:0016791	phosphatase activity	68/2659	271/22669	7.09312e-10	7.84499e-07	4.15632e-08	Eya1/Sgpp2/Dusp28/Ptpn7/Ppp2r5a/Pfkfb3/Sec16a/Noct/Pdp1/Rngtt/Plppr1/Ptpn3/Ptprd/Ptprf/Ptp4a2/Ppm1g/Ppp1cb/Ppef2/Ssh1/Ppp1cc/Pptc7/Ppm1k/Dusp11/Ptpro/Ppp5c/Timm50/Ptpn5/Inpp5f/Lhpp/Ptpre/Ptpn9/Nt5e/Dusp7/Ctdspl/Epm2a/Fig4/Pald1/Plppr3/Ptprq/Ppp1r12a/Ppm1h/Ctdsp2/Inpp5j/Dusp18/Mtmr3/Ublcp1/Nt5m/Ctdnep1/Ppm1d/Nt5c3b/G6pc3/Nt5c/Ptpdc1/Ppp3cb/Mdp1/Ptp4a3/Ppm1f/Synj2/Pgp/Dusp1/Ppp2r5d/Ptprs/Lpin2/Ppp1…	68
GO:0004721	MF	GO:0004721	phosphoprotein phosphatase activity	49/2659	171/22669	1.54878e-09	1.71295e-06	8.5081e-08	Eya1/Dusp28/Ptpn7/Ppp2r5a/Pdp1/Rngtt/Ptpn3/Ptprd/Ptprf/Ptp4a2/Ppm1g/Ppp1cb/Ppef2/Ssh1/Ppp1cc/Pptc7/Ppm1k/Dusp11/Ptpro/Ppp5c/Timm50/Ptpn5/Lhpp/Ptpre/Ptpn9/Dusp7/Ctdspl/Epm2a/Pald1/Ptprq/Ppp1r12a/Ppm1h/Ctdsp2/Dusp18/Mtmr3/Ublcp1/Ctdnep1/Ppm1d/Ptpdc1/Ppp3cb/Mdp1/Ptp4a3/Ppm1f/Pgp/Dusp1/Ppp2r5d/Ptprs/Ppp1ca/Dusp9	49
GO:0015077	MF	GO:0015077	monovalent inorganic cation transmembrane transporter activity	82/2659	361/22669	2.3549e-09	2.60452e-06	1.21755e-07	Kcnb2/Slc9a2/Asic4/Slc41a1/Atp1b1/Kcnj9/Kcnk2/Kcnj3/Slc4a10/Scn3a/Lrrc55/Kcna4/Slc12a6/Kcnip3/Slc4a11/Snap25/Slc24a3/Kcns1/Kcnn3/Kcnd3/Slc9b2/Slc24a2/Slc9a1/Kcnab2/Kcnh2/Kcnip4/Slc4a4/Hvcn1/Kcnd2/Atp6v0e2/Slc6a6/Slc6a11/Kcna5/Kcna1/Clcn4/Slc8a2/Grik5/Kcnk6/Scn1b/Kcnc3/Kcnj11/Abcc8/Kcnu1/Kcnn1/Slc9a5/Atp6v0d1/Kcng4/Atp2c2/Scn3b/Scn4b/Cox5a/Hcn4/Slc9a9/Scn5a/Scn11a/Slc1a6/Hcn2/Slc6a15/Kcnip1/Slc13a…	82
GO:0031267	MF	GO:0031267	small GTPase binding	92/2659	424/22669	3.01378e-09	3.33324e-06	1.47164e-07	Arhgef4/Tbc1d8/Dock10/Ngef/Rabgap1l/Vav2/Odf2/Arhgap1/Tbc1d20/Cse1l/Sike1/Strip1/Tbck/C9orf72/Arhgef39/Abca1/Yipf1/Rims3/Rap1gap/Arhgef10l/Rcc1l/Dgki/Dennd2a/Adcyap1r1/Rab11fip5/Fgd5/Brk1/Arhgdib/Akap13/Arhgef17/Arhgef7/Mcf2l/Adprhl1/Yipf2/Sorl1/Exph5/Dennd4a/Tbc1d2b/Myrip/Wasf1/Ranbp2/Bcr/Tbc1d30/Srgap1/Arhgef25/Rnf41/Tbc1d10a/Ranbp17/Kif3a/Obscn/Arhgef15/Sgsm2/Abr/Git1/Rab11fip4/Rundc1/Fmnl1/Tb…	92
GO:0022843	MF	GO:0022843	voltage-gated cation channel activity	42/2659	140/22669	5.02504e-09	5.55769e-06	2.3246e-07	Kcnb2/Cacna1e/Kcnj9/Kcnk2/Cacnb2/Kcnj3/Lrrc55/Kcna4/Snap25/Kcns1/Kcnd3/Kcnab2/Kcnh2/Hvcn1/Kcnd2/Kcna5/Kcna1/Grin2b/Ryr1/Kcnc3/Kcnj11/Cacng3/Kcng4/Hcn4/Htr1b/Cacna2d2/Hcn2/Cacna1g/Kcnh4/Cacng5/Kcnma1/Ptk2b/Kcns2/Kcnv1/Kcnq3/Kcnk9/Cacnb3/Kcnh3/Grik1/Kcnh8/Kcng2/Kcnip2	42
GO:0017016	MF	GO:0017016	Ras GTPase binding	88/2659	409/22669	1.00885e-08	1.11579e-05	4.43364e-07	Arhgef4/Tbc1d8/Dock10/Ngef/Rabgap1l/Vav2/Odf2/Arhgap1/Tbc1d20/Cse1l/Sike1/Strip1/Tbck/C9orf72/Arhgef39/Yipf1/Rims3/Rap1gap/Arhgef10l/Rcc1l/Dgki/Dennd2a/Rab11fip5/Fgd5/Brk1/Arhgdib/Akap13/Arhgef17/Arhgef7/Mcf2l/Adprhl1/Yipf2/Exph5/Dennd4a/Tbc1d2b/Myrip/Wasf1/Ranbp2/Bcr/Tbc1d30/Srgap1/Arhgef25/Rnf41/Tbc1d10a/Ranbp17/Kif3a/Obscn/Arhgef15/Sgsm2/Abr/Rab11fip4/Rundc1/Fmnl1/Tbc1d16/Dock4/Sos2/Daam1/Rapg…	88
GO:0008047	MF	GO:0008047	enzyme activator activity	95/2659	460/22669	2.26203e-08	2.5018e-05	9.46763e-07	Rgs20/Tbc1d8/Ccnt2/Rgs16/Rabgap1l/Atp1b1/Rgs4/Rgs7/Ppp2r5a/Arhgap21/Ptpa/Dab2ip/Chn1/Prkra/Arhgap1/Ralgapa2/Tbc1d20/Ralgapb/Strit1/Tbck/Nsmaf/Rgs3/Plaa/Rap1gap/Arhgef10l/Agap3/Dnajb6/Arap2/Mob1b/Dgkq/Rasal1/Agfg2/Chn2/Arhgdib/Sipa1l3/Arhgap33/Rab6a/Rgs10/Adprhl1/Rasa3/Rab3a/Arhgap10/Dnajb1/Sipa1l2/Arhgap32/Arhgap20/Elmod1/Parp16/Tbc1d2b/Arhgap18/Ranbp2/Bcr/Ric8b/Apaf1/Tbc1d30/Srgap1/Sec14l2/Tbc1d…	95
GO:0016247	MF	GO:0016247	channel regulator activity	41/2659	143/22669	3.19774e-08	3.5367e-05	1.27757e-06	Sgk3/Bcl2/Dpp10/Atp2b4/Kcnk2/Cacnb2/Lrrc55/Kcnip3/Kcns1/Ensa/Pias3/Camk2d/Mcub/Ptpn3/Pcsk9/Kcnab2/Akap9/Ywhah/Kcnip4/Stim2/Itpr1/Kcna5/Scn1b/Chrna7/Prkcb/Cacng3/Scn3b/Scn4b/Fxyd2/Grm2/Kcnip1/Fgf11/Cacng5/Vti1b/Lynx1/Cacnb3/Nedd4l/Nrxn2/Kcnip2/Flna/Wnk3	41
GO:0005249	MF	GO:0005249	voltage-gated potassium channel activity	29/2659	84/22669	3.84899e-08	4.25698e-05	1.4709e-06	Kcnb2/Kcnj9/Kcnk2/Kcnj3/Lrrc55/Kcna4/Snap25/Kcns1/Kcnd3/Kcnab2/Kcnh2/Kcnd2/Kcna5/Kcna1/Kcnc3/Kcnj11/Kcng4/Hcn4/Hcn2/Kcnh4/Kcnma1/Kcns2/Kcnv1/Kcnq3/Kcnk9/Kcnh3/Kcnh8/Kcng2/Kcnip2	29
GO:0003779	MF	GO:0003779	actin binding	90/2659	434/22669	4.31462e-08	4.77197e-05	1.58013e-06	Sntg1/Arpc2/Vil1/Actr3/Tnnt2/Enah/Cacnb2/Nebl/Myo3b/Ino80/Sptbn5/Map1a/Vps16/Myh7b/Epb41l1/Phactr3/Synpo2/Nexn/Tpm2/Cap1/Hpca/Epb41/Wasf2/Crocc/Tmem201/Nos3/Actr3b/Ywhah/Maea/Add1/Ablim2/Limch1/Ssh1/Hip1r/Hip1/Ppp1r9a/Wipf3/Sptbn4/Tlnrd1/Parva/Nod2/Cotl1/Trpc6/Pstpip1/Tpm1/Tln2/Dag1/Vill/Xirp1/Myrip/Syne1/Epb41l2/Wasf1/Ctnna3/Flii/Gas7/Myo1d/Samd14/Wipf2/Tns4/Fmnl1/Sntg2/Daam1/Actn1/Clmn/Adssl1/A…	90
GO:0035254	MF	GO:0035254	glutamate receptor binding	25/2659	67/22669	5.7121e-08	6.31758e-05	2.00825e-06	Arpc2/Rapsn/Map1a/Prnp/Syndig1/Snx27/Grin2b/Shisa7/Calm3/Shank1/Ptpn5/Cacng3/Homer3/Neto2/Necab2/Drd2/Ctnnb1/Adora2a/Sqstm1/Canx/Flot2/Calm1/Shank3/Gsk3b/Myo5b	25
GO:0004674	MF	GO:0004674	protein serine/threonine kinase activity	90/2659	439/22669	7.50059e-08	8.29565e-05	2.53562e-06	Sgk3/Clk1/Mapkapk2/Dstyk/Akt3/Rps6kc1/Nek6/Acvr1c/Acvr1/Myo3b/Tlk1/Pdk1/Map3k20/Eif2ak4/Top1/Trp53rka/Tnik/Prkci/Dclk1/Hipk1/Camk2d/Plk3/Nrbp1/Cdc7/Grk3/Ksr2/Camkk2/Lmtk2/Cdk8/Camk1/Akt2/Vrk3/Lmtk3/Akap13/Stk33/Prkcb/Sbk1/Mapk3/Brsk2/Mast1/Sik3/Ankk1/Camkv/Bcr/Csnk1g2/Cdk17/Irak3/Camk2b/Mapk9/Obscn/Map2k3/Mink1/Camkk1/Taok1/Ern1/Map2k6/Csnk1d/Cdkl1/Ccnk/Cdk13/Mak/Plk2/Nim1k/Ptk2b/Stk3/Mapk12/Acvr…	90
GO:0005089	MF	GO:0005089	Rho guanyl-nucleotide exchange factor activity	26/2659	73/22669	9.36799e-08	0.00010361	3.00739e-06	Arhgef4/Dock10/Ngef/Vav2/Arhgef39/Arhgef10l/Fgd5/Akap13/Arhgef17/Arhgef7/Mcf2l/Bcr/Arhgef25/Obscn/Arhgef15/Abr/Dock4/Sos2/Net1/Rasgrf2/Arhgef28/Spata13/Fgd4/Tiam1/Tiam2/Arhgef9	26
GO:0044325	MF	GO:0044325	ion channel binding	40/2659	143/22669	9.82882e-08	0.000108707	3.00739e-06	Kcnb2/Bag2/Dpp10/Lrrc55/Kcnip3/Prnp/Snap25/Fkbp1a/Src/S100a10/Kcnd3/Camk2d/Rims3/Kcnab2/Agrn/Ywhah/Ppp1r9a/Tcaf1/Itpr1/Calm3/Scn1b/Kcnj11/Abcc8/Kcng4/Scn3b/Scn4b/Trpc1/Scn5a/Ctnnb1/Trdn/Kcnip1/Hap1/Actn1/Calm1/Actn2/Kcnq3/Diaph1/Nedd4l/Kcnip2/Flna	40
GO:0005543	MF	GO:0005543	phospholipid binding	91/2659	448/22669	9.9226e-08	0.000109744	3.00739e-06	Sgk3/Mreg/Vil1/Zcchc2/Syt2/Phlda3/Rps6kc1/Syt14/Gle1/Dab2ip/Plekha3/Pla2g4b/Nsfl1c/Map1lc3a/Prkci/Snx27/Snx7/Clvs1/Unc13b/Abca1/Snx30/Sgip1/Faah/Epb41/Krit1/Snx17/Zfyve28/Dok7/Arap2/Rasal1/Hip1r/Scarb1/Hip1/Snx8/Gpr12/Gsdme/Itpr1/Cpne9/Plcz1/C2cd5/Syt5/Arhgap33/Syt9/Syt17/Osbpl5/Mcf2l/Plekha2/Snx25/Unc13a/Cpne2/Cpne7/Arhgap32/Nrgn/Gramd1b/Esyt3/Vill/Plcd1/Psap/Osbpl8/Obscn/Pemt/Flii/Pitpna/Doc2b/…	91
GO:0003712	MF	GO:0003712	transcription coregulator activity	87/2659	441/22669	6.97031e-07	0.000770916	1.98199e-05	Per2/Hdac4/Zbtb18/Med22/Trib3/Ncoa6/Ncoa3/Maml3/Pmf1/Pias3/Hipk1/Psip1/Cited4/Wnt4/Spen/Camta1/Ctbp1/Ldb2/Pus1/Ezh2/Kdm3a/Kdm5a/Bhlhe41/Dpf1/Mamstr/Prkcb/Tgfb1i1/Ctbp2/Dnajb1/Arl2bp/Cbfb/Mlip/Tfdp2/Ctnnb1/Bclaf1/Ncoa7/Med16/Tle2/Tle6/Wwc1/Sqstm1/Ncor1/Med13/Med1/Jup/Psmc3ip/Hdac5/Ddx5/Cys1/Hdac9/Actn1/Actn2/Gmnn/Cdyl/Mak/Phf2/Mcidas/Cenpj/Hr/Sub1/Basp1/Rbfox2/Mrtfa/Ep300/Yaf2/Hdac7/Kmt2d/Crebbp/R…	87
GO:0099106	MF	GO:0099106	ion channel regulator activity	32/2659	110/22669	6.99036e-07	0.000773133	1.98199e-05	Sgk3/Dpp10/Kcnk2/Cacnb2/Lrrc55/Kcnip3/Kcns1/Ensa/Pias3/Camk2d/Mcub/Pcsk9/Kcnab2/Akap9/Kcnip4/Stim2/Itpr1/Kcna5/Scn1b/Prkcb/Scn3b/Fxyd2/Grm2/Kcnip1/Vti1b/Lynx1/Cacnb3/Nedd4l/Nrxn2/Kcnip2/Flna/Wnk3	32
GO:0017048	MF	GO:0017048	Rho GTPase binding	42/2659	168/22669	1.33594e-06	0.00147755	3.66943e-05	Arhgef4/Dock10/Ngef/Vav2/Sike1/Strip1/Arhgef39/Arhgef10l/Fgd5/Brk1/Arhgdib/Akap13/Arhgef17/Arhgef7/Mcf2l/Wasf1/Bcr/Srgap1/Arhgef25/Obscn/Arhgef15/Abr/Fmnl1/Dock4/Sos2/Daam1/Net1/Rasgrf2/Iqgap2/Arhgef28/Vcl/Spata13/Fgd4/Tiam1/Tiam2/Daam2/Cdc42ep3/Diaph1/Flna/Arhgef9/Diaph2/Pak3	42
GO:0140297	MF	GO:0140297	NA	74/2659	365/22669	1.62374e-06	0.00179586	4.3248e-05	Hes6/Per2/Hdac4/Bcl2/Rxra/Nek6/Ddrgk1/Src/Ncoa3/Cebpb/Taf4/Arnt/Creb3/Psip1/Arid1a/Mad2l2/Ywhah/Ctbp1/Ldb2/Dgkq/Prdm5/Kdm3a/Fkbp4/Bhlhe41/Mamstr/Mef2a/Arnt2/Arntl/Prkcb/Tgfb1i1/Ctbp2/Tacc1/Bbs2/Smad3/Tcf12/Ctnnb1/Grm1/Ncoa7/Med16/Zbtb7a/Tle2/Tle6/Cry1/Ncor1/Med13/Med1/Jup/Stat3/Psmc3ip/Hdac5/Ddx5/Sox9/Hdac9/Hif1a/Gmnn/Rarb/Zfp503/Hr/Klf5/Scx/Atf4/Ep300/Hdac7/Crebbp/Gsk3b/Nrip1/Ets2/Hspa1a/Srf/Mta…	74
GO:0035091	MF	GO:0035091	phosphatidylinositol binding	58/2659	266/22669	2.0101e-06	0.00222317	5.09766e-05	Sgk3/Mreg/Vil1/Zcchc2/Phlda3/Rps6kc1/Dab2ip/Plekha3/Snx27/Snx7/Clvs1/Snx30/Epb41/Krit1/Snx17/Zfyve28/Dok7/Arap2/Hip1r/Hip1/Snx8/Gsdme/Itpr1/Plcz1/Syt5/Arhgap33/Syt9/Osbpl5/Mcf2l/Plekha2/Snx25/Arhgap32/Nrgn/Esyt3/Vill/Plcd1/Osbpl8/Obscn/Flii/Pitpna/Snx11/Grb7/Sh3yl1/Actn2/Iqgap2/Fcho2/Amer2/Laptm4b/Gpaa1/Syt10/Racgap1/Acap2/Snx9/Svil/Arap3/Pitpnm1/Osbp/Ogt	58
GO:0015297	MF	GO:0015297	antiporter activity	24/2659	74/22669	2.02991e-06	0.00224508	5.09766e-05	Slc9a2/Slc41a1/Slc4a10/Slc4a11/Slc24a3/Slc9b2/Slc24a2/Slc9a1/Slc26a5/Clcn4/Slc8a2/Slc9a5/Slc7a6/Slc9a9/Slc35d3/Slc19a1/Slc35e3/Slc26a10/Slc47a2/Slc25a10/Slc24a4/Clcn5/Slc9a7/Slc25a14	24
GO:0035255	MF	GO:0035255	ionotropic glutamate receptor binding	16/2659	39/22669	3.24784e-06	0.00359211	7.92966e-05	Rapsn/Map1a/Snx27/Grin2b/Shisa7/Shank1/Cacng3/Neto2/Drd2/Ctnnb1/Sqstm1/Canx/Flot2/Shank3/Gsk3b/Myo5b	16
GO:0004725	MF	GO:0004725	protein tyrosine phosphatase activity	28/2659	98/22669	4.98898e-06	0.00551782	0.000116105	Eya1/Dusp28/Ptpn7/Rngtt/Ptpn3/Ptprd/Ptprf/Ptp4a2/Ssh1/Dusp11/Ptpro/Timm50/Ptpn5/Ptpre/Ptpn9/Dusp7/Epm2a/Pald1/Ptprq/Dusp18/Mtmr3/Ptpdc1/Mdp1/Ptp4a3/Pgp/Dusp1/Ptprs/Dusp9	28
GO:0005088	MF	GO:0005088	Ras guanyl-nucleotide exchange factor activity	33/2659	125/22669	5.01963e-06	0.00555171	0.000116105	Arhgef4/Dock10/Ngef/Vav2/C9orf72/Arhgef39/Arhgef10l/Rcc1l/Dennd2a/Fgd5/Akap13/Arhgef17/Arhgef7/Mcf2l/Dennd4a/Bcr/Arhgef25/Obscn/Arhgef15/Abr/Dock4/Sos2/Rapgef5/Net1/Rasgrf2/Arhgef28/Dennd6a/Spata13/Dennd6b/Fgd4/Tiam1/Tiam2/Arhgef9	33
GO:0030165	MF	GO:0030165	PDZ domain binding	31/2659	115/22669	6.03506e-06	0.00667477	0.000136013	Atp2b4/Nos1ap/Kcnj9/Lzts3/Musk/Fzd1/Ctbp1/Lnx1/Grik5/Dlg2/Cacng3/Plekha2/Kirrel3/Cadm1/Hcn2/Tbc1d10a/Srr/Mpp3/Baiap2/Kidins220/Sntg2/Dock4/Ccdc88c/Erc2/Adgrb1/Shisa9/Crim1/Cask/Gria3/Atp2b3/L1cam	31
GO:0015298	MF	GO:0015298	solute:cation antiporter activity	13/2659	29/22669	8.46073e-06	0.00935757	0.000185913	Slc9a2/Slc41a1/Slc24a3/Slc9b2/Slc24a2/Slc9a1/Clcn4/Slc8a2/Slc9a5/Slc9a9/Slc24a4/Clcn5/Slc9a7	13

## Sheet: KEGG_up
	ID	Description	GeneRatio	BgRatio	pvalue	p.adjust	qvalue	geneID	Count
mmu04360	mmu04360	Axon guidance	29/585	180/8642	9.75347e-06	0.00287727	0.00254617	Sema4c/Enah/Pdk1/Src/Trpc3/Sema4a/Efna3/Sema6c/Camk2d/Rgs3/Ephb2/Wnt4/Sema3d/Ssh1/Plxna4/Sema4f/Plxna1/Trpc6/Sema3f/Plxnb1/Ntn4/Ntn1/Sema3g/Rnd1/Epha6/Slit1/Ablim1/Plxna3/Efnb1	29

## Sheet: KEGG_dn
	ID	Description	GeneRatio	BgRatio	pvalue	p.adjust	qvalue	geneID	Count
mmu04728	mmu04728	Dopaminergic synapse	23/434	135/8642	2.08959e-07	5.80906e-05	3.98122e-05	Akt3/Ppp2r5a/Ppp1cb/Itpr1/Grin2b/Akt2/Arntl/Prkcb/Ppp2r2d/Caly/Gnao1/Drd2/Gng7/Camk2b/Ppp1r1b/Drd1/Ppp3cb/Ppp2r2a/Gsk3b/Atf6b/Ppp2r5d/Ppp1ca/Gria3	23
mmu05215	mmu05215	Prostate cancer	17/434	97/8642	5.51277e-06	0.000356183	0.000244109	Bcl2/Akt3/E2f1/Foxo1/Tgfa/Akt2/Igf1r/Mapk3/Hras/Tcf7/Sos2/Ep300/Crebbp/Etv5/Gsk3b/Pdpk1/Zeb1	17
mmu04919	mmu04919	Thyroid hormone signaling pathway	19/434	118/8642	5.73015e-06	0.000356183	0.000244109	Rxrg/Akt3/Rxra/Ncoa3/Foxo1/Slc9a1/Akt2/Prkcb/Mapk3/Hras/Fxyd2/Ncor1/Med13/Med1/Thrb/Ep300/Crebbp/Gsk3b/Pdpk1	19
mmu04261	mmu04261	Adrenergic signaling in cardiomyocytes	22/434	152/8642	6.45423e-06	0.000356183	0.000244109	Bcl2/Akt3/Ppp2r5a/Cacnb2/Tpm2/Slc9a1/Ppp1cb/Slc8a2/Akt2/Cacng3/Mapk3/Ppp2r2d/Scn4b/Fxyd2/Tpm1/Camk2b/Ppp2r2a/Adcy9/Atf6b/Ppp2r5d/Crem/Ppp1ca	22
mmu04510	mmu04510	Focal adhesion	26/434	199/8642	6.52307e-06	0.000356183	0.000244109	Bcl2/Lamc1/Akt3/Ppp1cb/Ccnd2/Akt2/Igf1r/Prkcb/Mapk3/Hras/Tln2/Itga9/Ppp1r12a/Lamb1/Sos2/Actn1/Shc3/Vcl/Itga5/Gsk3b/Pdpk1/Diaph1/Ppp1ca/Elk1/Flna/Pak3	26
mmu04024	mmu04024	cAMP signaling pathway	27/434	213/8642	7.68741e-06	0.000356183	0.000244109	Akt3/Slc9a1/Htr1d/Ppp1cb/Grin2b/Akt2/Mapk3/Fxyd2/Drd2/Htr1b/Adora2a/Hcn2/Ppp1r12a/Camk2b/Ppp1r1b/Sox9/Drd1/Ptch1/Ep300/Crebbp/Adcy9/Tiam1/Pde10a/Arap3/Ppp1ca/Chrm1/Gria3	27
mmu04520	mmu04520	Adherens junction	14/434	72/8642	1.07995e-05	0.000378369	0.000259314	Wasf2/Igf1r/Mapk3/Insr/Wasf1/Ctnna3/Tcf7/Baiap2/Actn1/Vcl/Lmo7/Ep300/Crebbp/Sorbs1	14
mmu04810	mmu04810	Regulation of actin cytoskeleton	27/434	217/8642	1.08883e-05	0.000378369	0.000259314	Arpc2/Pip5k1a/Wasf2/Slc9a1/Ppp1cb/Mapk3/Hras/Fgf3/Arhgef7/Itga9/Wasf1/Ppp1r12a/Cyfip2/Git1/Baiap2/Sos2/Actn1/Iqgap2/Vcl/Spata13/Itga5/Tiam1/Diaph1/Ppp1ca/Chrm1/Diaph2/Pak3	27
mmu04720	mmu04720	Long-term potentiation	13/434	67/8642	2.2823e-05	0.000704978	0.000483154	Ppp1cb/Itpr1/Grin2b/Prkcb/Mapk3/Hras/Grm1/Camk2b/Ppp3cb/Ep300/Crebbp/Ppp1ca/Rps6ka3	13
mmu05223	mmu05223	Non-small cell lung cancer	12/434	66/8642	9.16896e-05	0.00246505	0.00168941	Rxrg/Akt3/Rxra/E2f1/Tgfa/Akt2/Prkcb/Mapk3/Hras/Sos2/Rarb/Pdpk1	12
mmu05205	mmu05205	Proteoglycans in cancer	24/434	206/8642	9.7538e-05	0.00246505	0.00168941	Akt3/Slc9a1/Ppp1cb/Itpr1/Akt2/Igf1r/Prkcb/Mapk3/Hras/Ppp1r12a/Camk2b/Ddx5/Sos2/Ptch1/Drosha/Wnt1/Itga5/Tiam1/Pdpk1/Hbegf/Ppp1ca/Wnt8b/Elk1/Flna	24
mmu05231	mmu05231	Choline metabolism in cancer	15/434	99/8642	0.000113025	0.00261842	0.00179453	Akt3/Pla2g4b/Gpcpd1/Pip5k1a/Wasf2/Dgki/Akt2/Prkcb/Mapk3/Hras/Wasf1/Dgkb/Sos2/Dgkh/Pdpk1	15
mmu04725	mmu04725	Cholinergic synapse	16/434	113/8642	0.000153249	0.00327696	0.00224585	Bcl2/Akt3/Chrna4/Itpr1/Akt2/Chrna7/Prkcb/Mapk3/Hras/Gnao1/Gng7/Camk2b/Kcnq3/Adcy9/Chrm1/Jak2	16
mmu04724	mmu04724	Glutamatergic synapse	16/434	114/8642	0.000170225	0.00327696	0.00224585	Pla2g4b/Itpr1/Grin2b/Grik5/Prkcb/Mapk3/Gnao1/Trpc1/Grm1/Gng7/Slc17a8/Ppp3cb/Shank3/Adcy9/Slc1a1/Gria3	16
mmu04015	mmu04015	Rap1 signaling pathway	24/434	214/8642	0.000176814	0.00327696	0.00224585	Akt3/Prkci/Rap1gap/Krit1/Grin2b/Akt2/Sipa1l3/Igf1r/Prkcb/Mapk3/Hras/Fgf3/Insr/Gnao1/Drd2/Tln2/Adora2a/Map2k6/Dock4/Rgs14/Adcy9/Tiam1/Arap3/Rasgrp2	24
mmu04730	mmu04730	Long-term depression	11/434	61/8642	0.000193453	0.00333593	0.00228627	Pla2g4b/Itpr1/Ryr1/Igf1r/Prkcb/Mapk3/Hras/Gnao1/Gucy1a2/Grm1/Gria3	11
mmu01522	mmu01522	Endocrine resistance	14/434	93/8642	0.000203996	0.00333593	0.00228627	Bcl2/Akt3/E2f1/Ncoa3/Akt2/Igf1r/Mapk3/Hras/Ncor1/Med1/Sos2/Shc3/Adcy9/Hbegf	14
mmu04921	mmu04921	Oxytocin signaling pathway	19/434	154/8642	0.000245694	0.00378042	0.0025909	Cacnb2/Ryr3/Pla2g4b/Ppp1cb/Camkk2/Itpr1/Ryr1/Prkcb/Cacng3/Mapk3/Hras/Gnao1/Gucy1a2/Ppp1r12a/Camk2b/Ppp3cb/Adcy9/Ppp1ca/Elk1	19
mmu04012	mmu04012	ErbB signaling pathway	13/434	84/8642	0.000258374	0.00378042	0.0025909	Akt3/Tgfa/Akt2/Prkcb/Mapk3/Hras/Camk2b/Sos2/Shc3/Gsk3b/Hbegf/Elk1/Pak3	13
mmu03015	mmu03015	mRNA surveillance pathway	14/434	96/8642	0.0002868	0.00398652	0.00273215	Ppp2r5a/Smg5/Rngtt/Ncbp1/Ppp1cb/Ppp2r2d/Upf1/Casc3/Cpsf3/Acin1/Ppp2r2a/Ppp2r5d/Ppp1ca/Nxf7	14
mmu04068	mmu04068	FoxO signaling pathway	17/434	132/8642	0.000309614	0.0040987	0.00280903	Sgk3/Akt3/Foxo1/Ccnd2/Akt2/Igf1r/Mapk3/Hras/Insr/Klf2/Grm1/Sos2/Plk2/Fbxo32/Ep300/Crebbp/Pdpk1	17
mmu04915	mmu04915	Estrogen signaling pathway	17/434	134/8642	0.00037067	0.00458674	0.00314351	Bcl2/Akt3/Ncoa3/Tgfa/Itpr1/Akt2/Mapk3/Hras/Gnao1/Grm1/Krt10/Krt15/Sos2/Shc3/Adcy9/Atf6b/Hbegf	17
mmu04713	mmu04713	Circadian entrainment	14/434	99/8642	0.000396921	0.00458674	0.00314351	Per2/Ryr3/Itpr1/Grin2b/Ryr1/Prkcb/Mapk3/Gnao1/Gucy1a2/Gng7/Camk2b/Per1/Adcy9/Gria3	14
mmu04022	mmu04022	cGMP-PKG signaling pathway	20/434	173/8642	0.000407009	0.00458674	0.00314351	Akt3/Oprd1/Ppp1cb/Itpr1/Slc8a2/Akt2/Mef2a/Pde2a/Mapk3/Insr/Kcnu1/Gucy1a2/Fxyd2/Ppp1r12a/Ppp3cb/Kcnma1/Adcy9/Atf6b/Srf/Ppp1ca	20
mmu05135	mmu05135	Yersinia infection	16/434	123/8642	0.000412477	0.00458674	0.00314351	Actr3/Akt3/Pip5k1a/Wasf2/Skap2/Wipf3/Akt2/Mapk3/Arhgef7/Wipf2/Map2k6/Baiap2/Ptk2b/Itga5/Gsk3b/Rps6ka3	16
mmu05226	mmu05226	Gastric cancer	18/434	150/8642	0.000500123	0.00513082	0.00351639	Bcl2/Rxrg/Akt3/Rxra/E2f1/Akt2/Mapk3/Hras/Fgf3/Ctnna3/Tcf7/Jup/Sos2/Shc3/Rarb/Wnt1/Gsk3b/Wnt8b	18
mmu04912	mmu04912	GnRH signaling pathway	13/434	90/8642	0.000515879	0.00513082	0.00351639	Pla2g4b/Itpr1/Prkcb/Mapk3/Hras/Camk2b/Map2k6/Sos2/Ptk2b/Adcy9/Egr1/Hbegf/Elk1	13
mmu05031	mmu05031	Amphetamine addiction	11/434	68/8642	0.000516773	0.00513082	0.00351639	Ppp1cb/Grin2b/Fosb/Prkcb/Camk2b/Ppp1r1b/Drd1/Ppp3cb/Atf6b/Ppp1ca/Gria3	11
mmu05213	mmu05213	Endometrial cancer	10/434	58/8642	0.000547532	0.00524875	0.00359721	Akt3/Akt2/Mapk3/Hras/Ctnna3/Tcf7/Sos2/Gsk3b/Pdpk1/Elk1	10
mmu04710	mmu04710	Circadian rhythm	7/434	30/8642	0.000570481	0.00528646	0.00362306	Per2/Bhlhe41/Arntl/Cry1/Per1/Nr1d1/Btrc	7
mmu01521	mmu01521	EGFR tyrosine kinase inhibitor resistance	12/434	80/8642	0.000593345	0.00532097	0.00364671	Bcl2/Akt3/Tgfa/Akt2/Igf1r/Prkcb/Mapk3/Hras/Sos2/Shc3/Gsk3b/Jak2	12
mmu05202	mmu05202	Transcriptional misregulation in cancer	20/434	183/8642	0.000839921	0.00729681	0.00500084	Eya1/Per2/Ccnt2/Rxrg/Rxra/Foxo1/Mllt3/Ccnd2/Igf1r/Kmt2a/Igfbp3/Ncor1/Jup/Ddx5/Etv1/Bcl11b/Il2rb/Etv5/Zeb1/Gria3	20
mmu05225	mmu05225	Hepatocellular carcinoma	19/434	171/8642	0.000920585	0.00775523	0.00531502	Akt3/E2f1/Gstm6/Arid1a/Actl6b/Tgfa/Akt2/Igf1r/Prkcb/Mapk3/Hras/Tcf7/Sos2/Shc3/Wnt1/Smarcd1/Gsk3b/Wnt8b/Elk1	19
mmu04722	mmu04722	Neurotrophin signaling pathway	15/434	121/8642	0.00103075	0.00842787	0.00577601	Bcl2/Akt3/Arhgdib/Akt2/Ntrk3/Mapk3/Hras/Irak3/Camk2b/Kidins220/Sos2/Shc3/Gsk3b/Pdpk1/Rps6ka3	15
mmu05214	mmu05214	Glioma	11/434	75/8642	0.00120392	0.00956254	0.00655365	Akt3/E2f1/Tgfa/Akt2/Igf1r/Prkcb/Mapk3/Hras/Camk2b/Sos2/Shc3	11
mmu04371	mmu04371	Apelin signaling pathway	16/434	139/8642	0.0015791	0.0121942	0.00835722	Hdac4/Akt3/Ryr3/Slc9a1/Itpr1/Slc8a2/Akt2/Ryr1/Mef2a/Mapk3/Hras/Klf2/Gng7/Hdac5/Adcy9/Egr1	16
mmu04910	mmu04910	Insulin signaling pathway	16/434	140/8642	0.00170282	0.0124726	0.00854805	Akt3/Prkci/Foxo1/Ppp1cb/Akt2/Mapk3/Hras/Insr/Prkar2b/Sos2/Shc3/Gsk3b/Pdpk1/Ppp1ca/Sorbs1/Elk1	16
mmu04010	mmu04010	MAPK signaling pathway	27/434	294/8642	0.00170489	0.0124726	0.00854805	Ptpn7/Cacna1e/Akt3/Cacnb2/Pla2g4b/Tgfa/Akt2/Ptpn5/Igf1r/Prkcb/Cacng3/Mapk3/Hras/Fgf3/Insr/Taok1/Map2k6/Sos2/Ppp3cb/Map3k13/Dusp1/Srf/Rasgrp2/Rps6ka4/Elk1/Flna/Rps6ka3	27
mmu05211	mmu05211	Renal cell carcinoma	10/434	68/8642	0.0019495	0.0138965	0.0095239	Akt3/Arnt/Tgfa/Akt2/Mapk3/Hras/Sos2/Ep300/Crebbp/Pak3	10
mmu04114	mmu04114	Oocyte meiosis	14/434	119/8642	0.00247594	0.0169456	0.0116136	Ppp2r5a/Ppp1cb/Cpeb2/Itpr1/Igf1r/Mapk3/Camk2b/Ppp3cb/Adcy9/Ppp2r5d/Ppp1ca/Btrc/Slk/Rps6ka3	14
mmu04960	mmu04960	Aldosterone-regulated sodium reabsorption	7/434	38/8642	0.00249917	0.0169456	0.0116136	Sfn/Prkcb/Mapk3/Insr/Fxyd2/Pdpk1/Nedd4l	7
mmu04917	mmu04917	Prolactin signaling pathway	10/434	72/8642	0.00300747	0.0199066	0.0136429	Akt3/Ccnd2/Akt2/Mapk3/Hras/Socs7/Sos2/Shc3/Gsk3b/Jak2	10
mmu05033	mmu05033	Nicotine addiction	7/434	40/8642	0.00338625	0.0218925	0.0150039	Chrna4/Gabrd/Gabra4/Grin2b/Chrna7/Slc17a8/Gria3	7
mmu04550	mmu04550	Signaling pathways regulating pluripotency of stem cells	15/434	138/8642	0.00381884	0.0241281	0.0165361	Akt3/Acvr1c/Acvr1/Skil/Akt2/Igf1r/Mapk3/Hras/Tcf7/Jarid2/Wnt1/Gsk3b/Jak2/Pcgf5/Wnt8b	15
mmu04360	mmu04360	Axon guidance	18/434	180/8642	0.0040043	0.0247377	0.0169539	Epha4/Ngef/Sema3a/Ablim2/Mapk3/Hras/Trpc1/Srgap1/Camk2b/Slit3/Gdf7/Ptch1/Ppp3cb/Gsk3b/Sema6a/Dcc/L1cam/Pak3	18
mmu04916	mmu04916	Melanogenesis	12/434	100/8642	0.00418553	0.0252952	0.0173359	Prkcb/Mapk3/Hras/Gnao1/Camk2b/Tcf7/Ep300/Wnt1/Crebbp/Adcy9/Gsk3b/Wnt8b	12
mmu05412	mmu05412	Arrhythmogenic right ventricular cardiomyopathy (ARVC)	10/434	77/8642	0.00492466	0.0291289	0.0199634	Cacnb2/Slc8a2/Cacng3/Dag1/Itga9/Ctnna3/Tcf7/Jup/Actn2/Itga5	10
mmu05034	mmu05034	Alcoholism	19/434	199/8642	0.00523752	0.030334	0.0207893	Hdac4/Ppp1cb/Camkk2/Grin2b/Fosb/Mapk3/Hras/Gnao1/Drd2/Adora2a/Gng7/Camkk1/Ppp1r1b/Hdac5/Sos2/Shc3/Drd1/Atf6b/Ppp1ca	19
mmu04340	mmu04340	Hedgehog signaling pathway	7/434	44/8642	0.00585792	0.0332347	0.0227773	Bcl2/Spopl/Ccnd2/Spop/Ptch1/Gsk3b/Btrc	7
mmu04934	mmu04934	Cushing syndrome	16/434	159/8642	0.00609857	0.033908	0.0232388	Kcnk2/Kcna4/E2f1/Arnt/Itpr1/Mapk3/Kmt2a/Cyp11a1/Camk2b/Tcf7/Wnt1/Kmt2d/Adcy9/Gsk3b/Atf6b/Wnt8b	16
mmu05224	mmu05224	Breast cancer	15/434	147/8642	0.00687085	0.0374529	0.0256682	Akt3/E2f1/Ncoa3/Hey1/Akt2/Igf1r/Mapk3/Hras/Fgf3/Tcf7/Sos2/Shc3/Wnt1/Gsk3b/Wnt8b	15
mmu04310	mmu04310	Wnt signaling pathway	16/434	162/8642	0.00727916	0.0389155	0.0266706	Dkk2/Ror1/Rspo1/Ccnd2/Prkcb/Camk2b/Tcf7/Ppp3cb/Ep300/Wnt1/Crebbp/Gsk3b/Daam2/Wnt8b/Btrc/Tbl1x	16
mmu05161	mmu05161	Hepatitis B	16/434	163/8642	0.00771118	0.0399591	0.0273858	Bcl2/Akt3/E2f1/Akt2/Prkcb/Mapk3/Hras/Apaf1/Map2k6/Sos2/Ptk2b/Ep300/Crebbp/Atf6b/Jak2/Elk1	16
mmu04072	mmu04072	Phospholipase D signaling pathway	15/434	149/8642	0.00776184	0.0399591	0.0273858	Akt3/Pla2g4b/Pip5k1a/Dgki/Akt2/Mapk3/Hras/Insr/Grm1/Dgkb/Sos2/Shc3/Ptk2b/Dgkh/Adcy9	15
mmu04931	mmu04931	Insulin resistance	12/434	110/8642	0.00893876	0.0451814	0.0309649	Akt3/Trib3/Foxo1/Ppp1cb/Akt2/Prkcb/Insr/Gsk3b/Pdpk1/Ppp1ca/Ogt/Rps6ka3	12
mmu04071	mmu04071	Sphingolipid signaling pathway	13/434	124/8642	0.00920767	0.0457095	0.0313268	Sgpp2/Bcl2/Akt3/Ppp2r5a/Oprd1/Akt2/Prkcb/Mapk3/Ppp2r2d/Hras/Ppp2r2a/Pdpk1/Ppp2r5d	13
mmu04611	mmu04611	Platelet activation	13/434	125/8642	0.00982338	0.0479105	0.0328353	Akt3/Pla2g4b/Prkci/Ppp1cb/Itpr1/Akt2/Mapk3/Gucy1a2/Tln2/Ppp1r12a/Adcy9/Ppp1ca/Rasgrp2	13
mmu04390	mmu04390	Hippo signaling pathway	15/434	154/8642	0.0103961	0.0494087	0.0338621	Prkci/Ppp1cb/Mob1b/Ccnd2/Dlg2/Ppp2r2d/Ctnna3/Tcf7/Gdf7/Ppp2r2a/Wnt1/Gsk3b/Ppp1ca/Wnt8b/Btrc	15
mmu04540	mmu04540	Gap junction	10/434	86/8642	0.0106638	0.0494087	0.0338621	Itpr1/Prkcb/Mapk3/Hras/Gucy1a2/Drd2/Grm1/Sos2/Drd1/Adcy9	10
mmu04911	mmu04911	Insulin secretion	10/434	86/8642	0.0106638	0.0494087	0.0338621	Kcnn3/Kcnj11/Abcc8/Prkcb/Kcnu1/Fxyd2/Camk2b/Kcnma1/Adcy9/Atf6b	10

[truncated: 7 more sheets: KEGG_all, GO_tfup, GO_tfdn, GO_tfall, KEGG_tfup, KEGG_tfdn, KEGG_tfall]
